# Supplementary material for: DNA Methylation Signature in Mononuclear Cells and Proinflammatory Cytokines May Define Molecular Subtypes in Sporadic Meniere Disease
Source: Preprints.org preprint supplement (doi:10.20944/preprints202110.0030.v1), 2021-10-01
Supplement: Supplementary file 1 [file Table_S10.xls]

## Sheet: Folha1
chr	start	end	nCpG	methdiff	gene
chr1	47687910	47687911	1	-0.384211	LINC01738
chr1	54518201	54518202	1	-0.351648	LINC02784
chr1	63327348	63327349	1	0.266667	MIR6068
chr1	153429190	153429191	1	-0.308081	S100A7P1
chr10	132419066	132419067	1	-0.466667	AL451069,2
chr11	46375607	46375608	1	-0.4	MIR4688
chr11	61588393	61588417	2	0.322368	AP002754,1
chr11	64935944	64935945	1	-0.375	GPHA2
chr11	97001243	97001244	1	-0.245442	MED28P5
chr11	119347068	119347069	1	-0.303571	MFRP
chr12	49366492	49366498	1	0.303846	SPATS2
chr14	19905347	19905348	1	-0.335227	OR4K4P
chr14	73458775	73458776	1	0.307692	NUMB
chr14	86282811	86282812	1	0.291176	AL161753,1
chr14	101041234	101041235	1	-0.38141	MIR300
chr15	78245794	78245795	1	-0.351449	ACSBG1
chr16	39180	39181	1	-0.428571	IL9RP3
chr16	1160664	1160665	1	-0.357143	AC120498,1
chr16	87065920	87065921	1	0.346154	AC106745,1
chr18	31966244	31966245	1	-0.37395	AC009831,2
chr2	24009691	24009692	1	0.566667	MFSD2B
chr2	131353763	131353867	1	-0.246226	AC073869,2
chr2	139668302	139668303	1	-0.108571	MRPS18BP2
chr2	163288458	163288459	1	-0.294118	RNU6-627P
chr20	52483882	52483883	1	-0.201087	AL049765,2
chr21	46184685	46184686	1	0.283077	AP001468,1
chr21	46184685	46184686	1	0.283077	SPATC1L
chr3	4981052	4981143	1	0.306554	BHLHE40-AS1
chr3	54640611	54640612	1	-0.409091	ESRG
chr4	4858705	4858706	1	0.333333	MSX1
chr5	191297	191298	1	0.384211	LRRC14B
chr6	29995365	29995366	1	-0.322115	MCCD1P2
chr6	84966663	84966664	1	-0.333333	AL109941,1
chr7	9850199	9850218	1	-0.0825942	AC006363,1
chr7	147166845	147166846	1	-0.289855	RANP2
chr8	12381108	12381109	1	-0.5	AC087203,2
chr8	74549569	74549570	1	-0.328571	MIR5681B
chr8	102528283	102528284	1	-0.318182	AP002852,1
† chr - chromossome; nCpG - number of CpG in DMR; methdiff - difference in methylation
