# Supplementary material for: DNA Methylation Signature in Mononuclear Cells and Proinflammatory Cytokines May Define Molecular Subtypes in Sporadic Meniere Disease
Source: Preprints.org preprint supplement (doi:10.20944/preprints202110.0030.v1), 2021-10-01
Supplement: Supplementary file 2 [file Table_S11.xls]

## Sheet: Folha1
gene set	Gene	Position	Strand	mean MD	mean Control	∆Mean	t-test	DF	p-value	padjust	CI_1	CI_2	SE
SV	chr7:152318877	KMT2C	+	0.647766861507355	0.732631992190816	-0.084865130683461	-15.3081197424179	17.9998804610778	9.1693220539687e-12	7.29788574073219E-07	-0.0965122246032098	-0.0732180367637122	0.0055437984619564
HL	chr3:10545443	ATP2B2	+	0.592010404640325	0.708281062501011	-0.116270657860686	-10.6867724916089	17.8745650330057	3.42749856989772e-09	0.0000184623126211433	-0.139139912293978	-0.0934014034273949	0.0108798664846642
HL	chr5:141550082	DIAPH1	+	0.665093966879681	0.770482425597515	-0.105388458717834	-10.9876499864203	15.9489480862986	7.54511361706019e-09	0.0000261539937928772	-0.125726901208167	-0.0850500162275009	0.00959153766711574
HL	chr6:75779789	MYO6	-	0.654307120509191	0.747813593203398	-0.0935064726942072	-10.4860370683318	15.9721815523566	1.43828070865767e-08	0.0000346382664796469	-0.112412845839638	-0.0746000995487763	0.00891723651984789
HL	chr4:122972953	SPATA5	-	0.64164396489421	0.729064641564642	-0.0874206766704315	-10.046598299373	16.511334373281	1.91133033000668e-08	0.0000421469242941957	-0.105820755982073	-0.0690205973587903	0.0087015200633519
SV	chr3:9002757	SRGAP3	+	0.589691211042795	0.696440305400634	-0.106749094357839	-9.52469998253084	17.4870167965689	2.44127720901173e-08	0.0000460220178114048	-0.130345012113989	-0.0831531766016893	0.0112076070168747
HL	chr1:215677582	USH2A	-	0.637421030654113	0.767100709274622	-0.129679678620509	-9.14584732612516	16.9663346437022	5.73152984513244e-08	0.0000680870044153204	-0.159599439737282	-0.0997599175037356	0.01417907756344
SV	chr8:13446699	DLC1	+	0.629835134157322	0.791068874809163	-0.161233740651842	-9.21432875063463	15.8680801773155	9.07895610187893e-08	0.0000859923381067025	-0.198353248526215	-0.124114232777468	0.0174981536925017
HL	chr10:71403578	CDH23	-	0.660671063587694	0.764042831269722	-0.103371767682028	-9.29583509148661	14.5005181683208	1.71523190904605e-07	0.00011753743754914	-0.127145271983204	-0.0795982633808515	0.0111202239136857
HL	chr12:80463357	PTPRQ	+	0.6575402725026	0.757441740998459	-0.0999014684958592	-8.21479305905023	17.8789847276867	1.7615796235291e-07	0.00011872323186714	-0.125463533353052	-0.074339403638666	0.0121611667850595
HL	chr6:24193787	DCDC2	+	0.580222841999812	0.668168795973674	-0.0879459539738615	-8.31955031736367	17.4470241724384	1.76076197847966e-07	0.00011872323186714	-0.110205360538752	-0.0656865474089712	0.0105709985058099
HL, SV	chr11:109912655	RDX	+	0.619650826142423	0.709935666185666	-0.0902848400432434	-8.14303550926548	17.983068067966	1.91526246951378e-07	0.000124845764479748	-0.113580110275987	-0.0669895698104997	0.0110873690702335
SV	chr3:76020431	ROBO2	-	0.653320405247518	0.741607401492341	-0.0882869962448226	-9.3710688439817	13.9672250491212	2.11630388052115e-07	0.000132505597935363	-0.108497974523705	-0.0680760179659399	0.00942123014084166
SV	chr18:58517865	ALPK2	+	0.573110473877737	0.681141336640058	-0.108030862762321	-8.91608408508348	14.7557332336565	2.51625103766946e-07	0.000145643385880925	-0.133893648460233	-0.0821680770644077	0.0121164024174082
SV	chr8:13480274	DLC1	+	0.426535068481173	0.261777634423442	0.164757434057731	9.08075442704048	13.6028343986942	3.81867824558497e-07	0.000179445281283618	0.12573645248857	0.203778415626891	0.0181435843664178
HL, SMD	chr10:54924915	PCDH15	-	0.602113688459486	0.7253558575927	-0.123242169133214	-7.80324689215856	17.6476306013489	3.98278833481392e-07	0.000182993808617898	-0.156471062910931	-0.0900132753554957	0.0157937036769987
SV	chr1:84158379	PRKACB	-	0.655910825868809	0.786221153100949	-0.130310327232139	-12.4636143550717	9.15782267211762	4.73935800560564e-07	0.000198236922719949	-0.153899781048044	-0.106720873416235	0.010455259888486
HL, SV	chr1:165321950	LMX1A	+	0.640041751635818	0.768775847808106	-0.128734096172288	-7.69792723698713	17.5218614487252	5.03770530426574e-07	0.000204297769102043	-0.163937116809828	-0.0935310755347469	0.0167232155110201
SMD	chr7:117360906	CFTR	+	0.644894854792524	0.744785642892839	-0.0998907881003157	-7.76360271100772	16.1292341489766	7.74591635338534e-07	0.000256128851266217	-0.127148906149765	-0.072632670050866	0.012866550726338
SV	chr3:76611689	ROBO2	-	0.594561416865864	0.790008685697375	-0.195447268831511	-7.32275378358878	17.973992170432	8.50919375495973e-07	0.000270711674268756	-0.251527546789563	-0.13936699087346	0.0266904056325823
HL, SMD	chr10:54280633	PCDH15	-	0.611382533528491	0.714976118652589	-0.103593585124099	-7.73836863053916	15.641031758043	9.86813545529008e-07	0.000293068255976162	-0.132025795691488	-0.0751613745567091	0.0133870057204655
SMD	chr10:126355102	ADAM12	+	0.61336235870208	0.74415374947633	-0.13079139077425	-7.6962302678488	14.6805549275985	1.5860227899487e-06	0.000382747329475188	-0.167082472126359	-0.0945003094221418	0.0169942148587516
SV	chr12:102446823	IGF1	-	0.631368394211655	0.730902777777778	-0.0995343835661229	-7.76004555144776	13.5050863493871	2.44990093615558e-06	0.000491118138376177	-0.127139416405058	-0.0719293507271878	0.0128265205282916
SMD	chr7:138977363	KIAA1549	+	0.624454149604075	0.70664999113275	-0.0821958415286751	-7.01966367017574	15.6274066489509	3.30004171319231e-06	0.000576820642627807	-0.107066784485575	-0.0573248985717754	0.011709370333211
HL, SMD	chr10:55175590	PCDH15	+	0.619278440752494	0.705691704572779	-0.0864132638202848	-6.89317473907985	15.5031380817316	4.28700302916077e-06	0.000669853716227161	-0.113057916863232	-0.0597686107773378	0.012536061697432
SV	chr15:47261522	SEMA6D	-	0.600157786440068	0.71265873015873	-0.112500943718662	-6.47834465145107	17.6946226204585	4.66848988939389e-06	0.000701482565502768	-0.149030095900061	-0.075971791537263	0.017365692900186
HL	chr8:101616463	GRHL2	-	0.634406410346308	0.738474188682917	-0.104067778336609	-6.38740678657982	17.1535039784624	6.4692004470682e-06	0.000848808898748042	-0.138418845737161	-0.0697167109360578	0.0162926492415137
SV	chr12:64050354	SRGAP1	-	0.635317392814076	0.746432579765913	-0.111115186951837	-6.81033966665448	14.4195479378854	7.24504487898252e-06	0.000906607065646538	-0.146013517511462	-0.0762168563922124	0.0163156600684532
HL	chr3:53684153	CACNA1D	+	0.384423116796628	0.521213282247765	-0.136790165451137	-7.33403486605196	12.467559482978	7.27183333557305e-06	0.000909153103427904	-0.177259734002357	-0.0963205968999174	0.0186514201185921
HL	chr5:141539731	DIAPH1	-	0.660585036054742	0.741695088889105	-0.0811100528343627	-6.50444381983297	15.717079360477	7.92561771674915e-06	0.00095133222157085	-0.107583880790773	-0.0546362248779523	0.0124699444073983
SV	chr19:2655294	GNG7	+	0.670428597767165	0.75562558356676	-0.0851969857995952	-6.14171617253889	17.9984620726748	8.44507557296403e-06	0.000984331169793273	-0.114340846653239	-0.0560531249459513	0.0138718533071476
SV	chr15:47365987	SEMA6D	+	0.514203628421065	0.630826393941844	-0.116622765520778	-7.54167930520244	11.5220339653436	8.6945266246091e-06	0.00100282399234311	-0.15047108645477	-0.082774444586787	0.0154637661986408
SV	chr10:34488123	PARD3	-	0.569069445960202	0.66359649122807	-0.0945270452678679	-6.15467654815391	17.3817798262603	9.59769643406788e-06	0.00106318218575408	-0.126876668509652	-0.062177422026084	0.0153585723844775
SV	chr17:66689728	PRKCA	-	0.610771493196305	0.511687552213868	0.0990839409824372	6.31955244333533	15.449069230895	1.19965637425518e-05	0.00120444101553704	0.0657494605131558	0.132418421451719	0.0156789490823725
SMD	chr16:24635440	TNRC6A	-	0.558997764380677	0.651469068135735	-0.0924713037550575	-6.52364501698497	13.7732282448796	1.45967038606524e-05	0.00134934148490085	-0.122920234128806	-0.0620223733813086	0.0141747908591438
SV	chr3:79415879	ROBO1	+	0.529571251517598	0.63961118702498	-0.110039935507382	-6.04383342898574	15.8636352519087	1.76881880867917e-05	0.00150978645223458	-0.148663984716039	-0.0714158862987247	0.0182069768798788
HL	chr3:53388989	CACNA1D	+	0.579638492650655	0.660120792422872	-0.0804822997722167	-5.93590487404514	15.6507200877689	2.29144120438389e-05	0.00175323388323792	-0.109277376264373	-0.0516872232800602	0.0135585561898283
SV	chr3:9040814	SRGAP3	-	0.647706010321749	0.743863471314452	-0.0961574609927028	-5.73172318051881	17.2064673230537	2.33314871210019e-05	0.00177631312674769	-0.131520164289376	-0.0607947576960299	0.0167763616567399
SV	chr7:82403164	CACNA2D1	+	0.547406110794855	0.627771655646831	-0.080365544851976	-6.15400731627843	13.8610268189705	2.6141392675928e-05	0.00190128649978133	-0.108400809486138	-0.0523302802178137	0.013059059036117
SV	chr7:82122330	CACNA2D1	+	0.609820068403018	0.69229295608606	-0.0824728876830418	-5.97010764063996	14.1873950172107	3.24141150560232e-05	0.0021578834301517	-0.112064951837547	-0.0528808235285372	0.0138143049752787
SMD	chr2:203160398	NBEAL1	-	0.610903516459867	0.691812024579847	-0.0809085081199801	-6.25218670394381	12.5274468512471	3.49772939157828e-05	0.00226163317073796	-0.108973059789397	-0.0528439564505629	0.0129408336556782
SV	chr19:13542968	CACNA1A	+	0.560883461776319	0.644602984734564	-0.0837195229582448	-5.36963477461556	17.9997060268525	4.20146872455557e-05	0.00251075828544357	-0.11647564218659	-0.0509634037298992	0.0155912881363963
SMD	chr2:203159956	NBEAL1	-	0.615829332333909	0.709842826019297	-0.0940134936853876	-5.58462909705284	15.8548151877507	4.2484087255183e-05	0.00252735657284389	-0.129727258537727	-0.0582997288330483	0.0168343308125872
SMD	chr21:10562624	TPTE	-	0.609896371050054	0.690360655426445	-0.0804642843763913	-6.1444683848853	12.2660205361453	4.53447232503933e-05	0.00263066873228573	-0.108928234767772	-0.0520003339850103	0.0130954021302029
SV	chr3:155069426	MME	+	0.630287902727834	0.748952667111235	-0.118664764383401	-7.52678499350348	8.5913760226609	4.6201776644586e-05	0.00266062916645654	-0.154589429588372	-0.0827400991784292	0.0157656641561866
HL	chr6:24216484	DCDC2	+	0.591189440238534	0.696954418130889	-0.105764977892355	-6.52136928475319	10.6416275235368	5.0240144795749e-05	0.00279385330388118	-0.141608246507931	-0.0699217092767798	0.0162182163398768
SV	chr3:76217582	ROBO2	+	0.611392464911372	0.708865793711331	-0.097473328799959	-5.65673312362195	14.3361541829812	5.41159052444501e-05	0.00291250690393187	-0.134349832837384	-0.0605968247625338	0.0172313819071506
SV	chr8:16222507	MSR1	-	0.517116704805492	0.603686624701117	-0.0865699198956255	-5.46385912749942	15.6121870447427	5.67149774421675e-05	0.00298943280359187	-0.120225844116662	-0.0529139956745893	0.0158440980771122
HL	chr1:216095228	USH2A	-	0.577323406386238	0.670227665852666	-0.092904259466428	-5.66411208266726	13.995563885289	5.85115274280496e-05	0.00304514566127141	-0.128084662239778	-0.0577238566930777	0.0164022636046917
SMD	chr7:117702332	CFTR	-	0.583542731173697	0.66450905695126	-0.0809663257775627	-5.83127556245155	12.7692259902188	6.29890158262106e-05	0.00317076369032291	-0.111017898907919	-0.0509147526472069	0.013884839587914
SV	chr10:34349620	PARD3	+	0.523484463833843	0.66535723366387	-0.141872769830027	-6.16866206403555	11.2040740613901	6.48265382487457e-05	0.00322755004072538	-0.192380860109932	-0.0913646795501222	0.0229989531534191
HL, SV	chr7:32392222	PDE1C	+	0.587093874544118	0.675548884093776	-0.088455009549658	-6.10835797865888	11.4305141507202	6.4904246189164e-05	0.00322829159669883	-0.120181581810514	-0.0567284372888023	0.0144809799718187
HL, SMD	chr10:53863479	PCDH15	+	0.580792428961044	0.661271615559274	-0.0804791865982302	-5.29948781394432	16.2475959179163	6.83401803379493e-05	0.00333056310192478	-0.112632708604187	-0.048325664592273	0.0151862197675913
SV	chr7:90177864	STEAP2	+	0.581319380172481	0.66835096102277	-0.0870315808502896	-5.28797892793741	16.3061950273496	6.91075601480718e-05	0.00335290932378195	-0.121868622353677	-0.0521945393469026	0.0164583826895537
HL	chr3:53472631	CACNA1D	-	0.548834516817614	0.643779685787358	-0.0949451689697445	-5.60249604139382	13.5032746518272	7.45604308541633e-05	0.00351499398600681	-0.131418581972227	-0.0584717559672622	0.0169469408399838
SV	chr3:79605304	ROBO1	-	0.305585491718677	0.462448767462521	-0.156863275743844	-5.22736472129618	16.1313989080049	8.08217419183648e-05	0.0036870086539026	-0.220435515558274	-0.0932910359294133	0.0300080985558145
HL	chr12:80458556	PTPRQ	+	0.470076741317364	0.553549331525983	-0.0834725902086187	-5.77015137729862	11.9274272922723	9.09138753583533e-05	0.00394854511223559	-0.115013176667699	-0.051932003749539	0.0144662738896285
HL	chr1:216129666	USH2A	+	0.600308196812232	0.682600440495177	-0.0822922436829452	-4.91871435515919	17.2124726564224	0.000125481587594795	0.00476364844813003	-0.117557218946536	-0.0470272684193548	0.0167304376186492
HL	chr2:73414643	ALMS1	-	0.50609504386196	0.596501864148923	-0.0904068202869625	-6.66352840716741	8.24694325337384	0.0001381139786319	0.00503451197544765	-0.121531002956768	-0.0592826376171571	0.013567409750924
SV	chr2:161577127	SLC4A10	-	0.569941738602611	0.652538222515537	-0.0825964839129258	-5.0053437620113	15.5686149063008	0.000140353852613181	0.00508229028525181	-0.117657385064312	-0.0475355827615397	0.0165016605931849
HL, SMD	chr10:55026981	PCDH15	+	0.585978164415472	0.68399856049205	-0.0980203960765778	-5.24666887850935	13.2753533086146	0.000147232312298394	0.00522728416043659	-0.138296345339556	-0.0577444468135999	0.0186824056075036
HL	chr2:169361300	LRP2	-	0.421110651658529	0.337636836343733	0.0834738153147958	5.8106042346518	10.3302660825335	0.000150211854050698	0.00528473944770231	0.0516030533650613	0.11534457726453	0.0143657719479492
SMD	chr5:140948764	PCDHA9	-	0.462380187168925	0.542824003729445	-0.0804438165605204	-6.03429571976126	9.46791292322602	0.000157978040952824	0.00544299984685711	-0.110375199614246	-0.0505124335067943	0.0133311027991354
HL	chr12:65336390	MSRB3	+	0.637860789305152	0.71795230912878	-0.0800915198236275	-6.80863235103028	7.6841310851221	0.000164596181937021	0.00558066629065586	-0.107412903463484	-0.052770136183771	0.0117632316880068
HL, SV	chr11:110006984	RDX	+	0.651835606037287	0.732719397681035	-0.0808837916437478	-5.24418730778987	12.849086197565	0.000164670999398937	0.00558143763432448	-0.114244091818769	-0.0475234914687264	0.0154235131006096
SV	chr3:134247294	RYK	+	0.467520676974072	0.371998074781123	0.0955226021929489	6.51790235148559	8.18543205492978	0.00016685469166841	0.00562602020103289	0.061859941266962	0.129185263118936	0.0146554208764998
HL, SMD	chr5:90721360	ADGRV1	+	0.355578815847815	0.503239624352156	-0.147660808504342	-5.26408992221151	12.5507579509129	0.000172051527109207	0.00572586800602298	-0.20848165206193	-0.0868399649467531	0.0280505862715786
HL	chr12:65397684	MSRB3	-	0.485026813755805	0.683555479608111	-0.198528665852306	-5.54471417629679	10.9908189198847	0.000174662094336356	0.00577396184519427	-0.277343041314659	-0.119714290389952	0.0358050315201097
SMD	chr7:117469517	CFTR	-	0.540305887721301	0.620634213281272	-0.0803283255599708	-4.69106172857819	17.9589681032584	0.000183022332083444	0.00593807236245489	-0.116309773277593	-0.044346877842349	0.0171236982601628
SMD	chr5:140901643	PCDHA9	-	0.625716067926373	0.723127044738887	-0.0974109768125138	-4.7944882823229	15.7290203333212	0.000207899252580427	0.00640627812766089	-0.140542078340936	-0.0542798752840915	0.0203172833212805
HL	chr12:80550423	PTPRQ	-	0.299449419627991	0.477272727272727	-0.177823307644736	-4.73065920568254	16.3936051135064	0.000212304089618508	0.00648889811676722	-0.257354362704126	-0.0982922525853464	0.0375895408891708
SV	chr20:57265187	BMP7	+	0.436216191258896	0.344445987154369	0.0917702041045272	6.02423009674753	8.77930613640706	0.000217281889393357	0.00658146059504127	0.057177093937816	0.126363314271238	0.0152335157573204
SV	chr17:66698771	PRKCA	+	0.66179637007403	0.745209851876519	-0.0834134818024883	-6.19439952879128	7.93112115476769	0.000270439748267287	0.00748477219048427	-0.114513025041264	-0.0523139385637128	0.0134659512055666
SV	chr3:77237349	ROBO2	-	0.607051641286685	0.704345638565239	-0.0972939972785538	-4.93211861238733	12.9431202588054	0.000277539274057344	0.00760106445369509	-0.139929800384566	-0.0546581941725413	0.0197266134342742
SV	chr3:49397243	RHOA	+	0.621191203754229	0.721121325784639	-0.0999301220304095	-4.47522435470121	17.9743438163992	0.000293501259836408	0.00785689581152615	-0.146847742595312	-0.0530125014655065	0.0223296340272713
SV	chr19:2607483	GNG7	+	0.589093057984035	0.671046671814216	-0.0819536138301802	-5.17738511683288	11.001417928167	0.000304859216536737	0.00803073629973123	-0.116792793723675	-0.0471144339366852	0.0158291515853688
SMD	chr9:13106557	MPDZ	-	0.610679423284465	0.714473684210526	-0.103794260926061	-4.63466954952421	15.2443299449937	0.000310989101619221	0.00813605989783828	-0.151461909607121	-0.0561266122450005	0.0223951804582738
SV	chr8:90720316	TMEM64	-	0.559127599021451	0.658689458689459	-0.0995618596680075	-4.95874455515585	12.1816841235934	0.000316980139526405	0.00823444688564278	-0.143235891704333	-0.0558878276316824	0.0200780376082265
HL, SMD	chr10:54516577	PCDH15	+	0.593305204396812	0.686339190292357	-0.0930339858955451	-5.61233382122014	8.81479954406089	0.000354824642486026	0.00881390807197617	-0.130653533883597	-0.0554144379074931	0.0165767021098754
HL	chr12:65440113	MSRB3	+	0.481246123771555	0.627146464646465	-0.14590034087491	-5.01309344358529	11.0423073787447	0.000389726457427001	0.00931814002181807	-0.209927561165126	-0.0818731205846932	0.0291038542402601
SV	chr3:76840338	ROBO2	-	0.397011860464209	0.14230350259762	0.254708357866589	5.12358736113512	10.3701628270065	0.000399659753548304	0.00945752406838115	0.14447473084437	0.364941984888808	0.0497128944845705
SV	chr3:155146291	MME	+	0.467009500907815	0.589414281083598	-0.122404780175783	-4.50562769647658	14.9961646550373	0.000418832039442872	0.00972435332167251	-0.18031134557501	-0.0644982147765555	0.0271670871233999
SV	chr4:94908233	BMPR1B	+	0.644591389003154	0.736358024691358	-0.0917666356882043	-5.49921800405065	8.67643617104728	0.000432799112813036	0.00991562265543882	-0.129731424394795	-0.053801846981614	0.0166872154587453
HL	chr1:216067484	USH2A	+	0.610529124583963	0.699721784133029	-0.0891926595490662	-5.60823936038086	8.30236196557106	0.000442570684568514	0.0100491295896614	-0.125635839034813	-0.0527494800633194	0.0159038610547124
HL	chr12:15729159	EPS8	-	0.641185872448973	0.723567193675889	-0.0823813212269167	-4.53721900103098	13.978954398709	0.000466619993939361	0.0103777026870912	-0.12132925838797	-0.043433384065863	0.0181567874965254
SV	chr8:16230255	MSR1	-	0.510453289649682	0.636802395135728	-0.126349105486046	-5.83866866538526	7.58133879933454	0.000474567546735453	0.0104870183778239	-0.176734924121101	-0.0759632868509916	0.0216400540477851
SMD	chr5:140884962	PCDHA9	-	0.397956481923873	0.305988679363292	0.0919678025605809	4.92762623213107	10.6889893090619	0.000491236541516287	0.0106992313406027	0.050742948832313	0.133192656288849	0.0186637131608919
HL	chr6:24200730	DCDC2	+	0.53372200937738	0.633105635465475	-0.099383626088095	-5.16521483585433	9.4794664054171	0.000500766892237143	0.0108071509426544	-0.142576382200393	-0.0561908699757968	0.019240947229963
SV	chr4:110494118	ENPEP	+	0.611932203071728	0.693851436794985	-0.0819192337232574	-4.75822947046562	11.4301808965156	0.000532288423047201	0.0111901779331803	-0.119638842566084	-0.044199624880431	0.017216326835797
SV	chr2:221427675	EPHA4	-	0.610700538650008	0.694546194546194	-0.0838456558961865	-4.29280693534284	16.3646053989413	0.000533169327034065	0.0112047811919374	-0.125176081692235	-0.042515230100138	0.0195316624201946
HL	chr8:71580166	EYA1	+	0.62050691432953	0.712357878017107	-0.0918509636875769	-4.22048968831364	17.662290334172	0.000533718227756474	0.0112106406394874	-0.137636297560395	-0.0460656298147589	0.0217631058172961
HL, SMD	chr5:90837325	ADGRV1	-	0.586569823854307	0.670588212228238	-0.0840183883739313	-5.74874848514127	7.49943666006283	0.00054472364075799	0.0113493037115586	-0.118116416516543	-0.0499203602313191	0.0146150746707901
HL, SV	chr11:109924616	RDX	+	0.584237144434513	0.666362679466128	-0.0821255350316148	-5.44736101840934	8.27032592718246	0.000544954761690811	0.0113507040930898	-0.116694518014895	-0.047556552048335	0.0150762056625349
SV	chr4:94778862	BMPR1B	-	0.610187745712679	0.693977352234118	-0.083789606521439	-4.51158832237007	13.1869808620142	0.000564689772398535	0.0116031818393885	-0.123854404746094	-0.0437248082967835	0.0185720860447262
SV	chr4:156831814	PDGFC	-	0.596159473174621	0.695779220779221	-0.0996197476045994	-4.65553334768088	11.9173685955327	0.000565337797806125	0.011611336516052	-0.146278164901924	-0.0529613303072751	0.021398138551456
SV	chr10:34703045	PARD3	+	0.568191705586664	0.657395462753932	-0.089203757167268	-4.61510946691908	12.2247571907237	0.00056729459494878	0.011636374567794	-0.131231516698138	-0.0471759976363983	0.0193286330057124
HL, SMD	chr5:90868331	ADGRV1	-	0.599119968193387	0.682735442661913	-0.0836154744685262	-4.63087401361821	12.0754230017363	0.000569842057052328	0.0116720029006711	-0.122929077732387	-0.0443018712046658	0.0180560892441977
SV	chr7:82359294	CACNA2D1	-	0.626213463854441	0.720169413919414	-0.0939559500649726	-4.81661683267653	10.6169381717394	0.000595657877870134	0.0119881171844572	-0.137079501408558	-0.0508323987213874	0.0195066274376578
SV	chr3:76304684	ROBO2	-	0.519428213446874	0.605580664854858	-0.0861524514079847	-5.04023612996954	9.42670682047707	0.000607054710856028	0.01212395609123	-0.124554198552032	-0.0477507042639369	0.0170929395342645
SMD	chr11:108237615	ATM	-	0.611160000186619	0.512579365079365	0.0985806351072538	5.68202466117303	7.21486619935957	0.000672864925204494	0.0128898397212382	0.0578018225579302	0.139359447656577	0.0173495612894616
HL	chr1:103059598	COL11A1	+	0.588126344757693	0.690738274071607	-0.102611929313914	-5.22350519801093	8.23368335947473	0.00072863520395338	0.0134965350345621	-0.147688874169089	-0.0575349844587399	0.0196442667182543
SV	chr22:21784786	MAPK1	+	0.418730338289162	0.513031421622753	-0.094301083333591	-4.09916981767209	16.461703485759	0.00079431860349732	0.0142222153975043	-0.142958410354684	-0.0456437563124976	0.0230049223447748
HL	chr10:25956596	MYO3A	-	0.622333798520106	0.702631088047755	-0.0802972895276486	-4.67326331121637	10.2647513356424	0.000817100798342038	0.0144590505119446	-0.118448355803729	-0.0421462232515682	0.0171822737518183
SV	chr18:34620304	DTNA	+	0.61829025091409	0.7385884583253	-0.12029820741121	-4.9029301637932	8.63602722143278	0.000952244742742194	0.0158304014287539	-0.176161098927031	-0.0644353158953902	0.0245359822376382
HL	chr10:71416508	CDH23	-	0.618794581236748	0.704742353217963	-0.0859477719812149	-4.96886714777342	8.36890388677283	0.000957603935112751	0.015886834052519	-0.125531332637136	-0.0463642113252937	0.0172972569853731
HL	chr7:103415612	SLC26A5	-	0.586252356480018	0.667138009049774	-0.0808856525697552	-4.34408763738828	11.8905440564411	0.000974997376998664	0.0160505485768416	-0.121495973473861	-0.0402753316656495	0.0186197101259184
HL	chr8:71254953	EYA1	+	0.589585204711255	0.700361197110423	-0.110775992399168	-5.10967768750812	7.81774007156127	0.000986663296151355	0.0161663792690737	-0.160972944784711	-0.0605790400136254	0.0216796438393732
HL	chr19:10205431	DNMT1	+	0.655338002125044	0.765162751030498	-0.109824748905454	-3.91774306244094	17.9227862503279	0.00101582501071698	0.0164556968897072	-0.168737368755501	-0.0509121290554061	0.0280326573629429
SMD	chr21:10561174	TPTE	+	0.455036603955777	0.573856209150327	-0.11881960519455	-4.81836487228122	8.38491241498926	0.00115967840580299	0.0177970785532578	-0.17523386616801	-0.0624053442210893	0.0246597358946575
SV	chr8:13522539	DLC1	+	0.606743338360985	0.757269146975029	-0.150525808614044	-4.49388267826509	9.84001735473311	0.00120139579774228	0.0181771714854812	-0.225323713874235	-0.0757279033538525	0.0334957139273062
HL, SMD	chr10:55320822	PCDH15	+	0.62901907174353	0.724761904761905	-0.0957428330183748	-4.71992688599447	8.382184404713	0.00132280679951425	0.0192437640650497	-0.142151042761953	-0.0493346232747968	0.0202848127377724
SV	chr7:152291547	KMT2C	-	0.48242817855215	0.606399241456713	-0.123971062904563	-4.17376621184349	11.5498219853536	0.00139951583223119	0.019923484460961	-0.18896800417432	-0.0589741216348057	0.029702445372427
SV	chr7:152377090	KMT2C	+	0.501136865304798	0.590856039385451	-0.0897191740806532	-4.07508893557141	12.5029306737707	0.00141837516655294	0.0200859785967769	-0.137475857477401	-0.0419624906839056	0.0220164947315617
SV	chr3:79415924	ROBO1	+	0.52105910627133	0.602062047679864	-0.0810029414085334	-4.06682489727691	12.2046926107384	0.0015106978016632	0.0208710270789335	-0.124319906370768	-0.0376859764462991	0.0199179810920239
SV	chr2:161577158	SLC4A10	-	0.628337315621798	0.70998056736043	-0.0816432517386316	-3.75100241514126	16.116225574147	0.00172491424470225	0.0226494699019422	-0.127757478228349	-0.0355290252489142	0.0217657155882042
SV	chr8:13405597	DLC1	-	0.563609751933146	0.64963458588411	-0.0860248339509644	-4.19879781333793	10.2480560712643	0.00173652490841999	0.0227418908184382	-0.131525536429308	-0.0405241314726208	0.0204879676934425
SV	chr7:82355644	CACNA2D1	-	0.607601818055157	0.699621212121212	-0.0920193940660549	-4.24843702152087	9.6567420948667	0.00183191419308091	0.0234782006544852	-0.140513505618521	-0.043525282513589	0.0216595876553946
SV	chr8:13523553	DLC1	+	0.57628892112229	0.657764681555004	-0.0814757604327145	-4.18665841631509	9.9390027194912	0.00189292266065601	0.0239250654973581	-0.124873244088973	-0.0380782767764556	0.0194608091539567
SV	chr22:32814107	TIMP3	+	0.584085104522168	0.685859097043308	-0.10177399252114	-4.393165347527	8.58181739415347	0.00194845543816662	0.0243293168373213	-0.154571985230333	-0.0489759998119471	0.0231664379712979
SV	chr3:78780836	ROBO1	-	0.592020191746169	0.695793814601864	-0.103773622855695	-4.61768291236085	7.29054163068284	0.00218787970746749	0.0261080022555734	-0.156487740137162	-0.0510595055742278	0.0224730941524609
HL	chr3:53475817	CACNA1D	-	0.648493009169558	0.729927303976217	-0.0814342948066588	-4.24125643746562	8.96325561410994	0.00219037895302805	0.0261259161521572	-0.124896027865266	-0.0379725617480515	0.0192005119254992
HL, SMD	chr5:90665789	ADGRV1	-	0.402254733245013	0.549601235085106	-0.147346501840093	-4.0316620446805	10.3452863663631	0.00223473474441566	0.0264422002041677	-0.228412128663007	-0.0662808750171795	0.0365473346245643
SV	chr8:13265534	DLC1	-	0.562885229849516	0.645520237080339	-0.0826350072308237	-4.40186472813171	7.55133733848125	0.0026228022565965	0.029141857251582	-0.126376812116785	-0.0388932023448626	0.0187727275449232
HL	chr1:216079986	USH2A	+	0.548387849496319	0.650979907773386	-0.102592058277067	-4.01864384736728	9.42196471646544	0.0027556137803803	0.0300582416377952	-0.159950862856312	-0.0452332536978214	0.025529024759006
HL	chr16:21284395	CRYM	-	0.51035533456039	0.414875329349014	0.0954800052113761	3.93621458470852	9.03124748433125	0.00340245190127589	0.0342353255765349	0.0406362182002654	0.150323792222487	0.0242568089611523
SV	chr4:95037875	BMPR1B	+	0.471694488071909	0.634398723257419	-0.16270423518551	-3.9159668678204	8.49433083635924	0.00395235502026769	0.0374688650830491	-0.257554316549043	-0.0678541538219773	0.0415489304882884
HL	chr7:83436214	SEMA3E	+	0.620290103220775	0.717820191504402	-0.0975300882836265	-3.84044136788655	8.76753684605375	0.00416217352199445	0.0386597551908076	-0.155211824710408	-0.0398483518568451	0.0253955415383151
SV	chr18:34537973	DTNA	+	0.547424804169846	0.628420713290908	-0.0809959091210626	-4.45034530773137	6.09617058183571	0.00416374531933114	0.0386666372100576	-0.1253597532441	-0.0366320649980254	0.0181999156290979
HL	chr13:60052735	DIAPH3	+	0.648117979249116	0.734530991883933	-0.0864130126348172	-4.0029837523683	7.65282076716679	0.00430664310200712	0.0394957059808533	-0.136588917159919	-0.0362371081097151	0.0215871504808612
HL, SMD	chr10:54191880	PCDH15	+	0.585144300054845	0.498867428678214	0.0862768713766311	3.34339986017792	15.1454203421159	0.00439502246884692	0.0399814572994636	0.0313204978014238	0.141233244951838	0.0258051309998081
HL, SV, SMD	chr15:51603451	DMXL2	+	0.577093091561247	0.659605308561258	-0.082512217000011	-3.58369455383543	10.3193141143896	0.00474007626447781	0.0418676377834846	-0.133599289960074	-0.0314251440399482	0.0230243442236735
SV	chr4:102589956	NFKB1	+	0.669199341364108	0.483546531764181	0.185652809599927	4.03324092109905	7.13132090634647	0.00478669904635027	0.0421170664934022	0.0772125573756255	0.294093061824229	0.0460306768754437
HL	chr5:119621996	HSD17B4	-	0.501923825678801	0.600863217899437	-0.0989393922206353	-4.23015173897293	6.26470963855707	0.00499143435840356	0.0432067860287556	-0.155589319985888	-0.0422894644553825	0.0233890882232649
HL	chr1:216062207	USH2A	+	0.479176056387467	0.565738795518207	-0.08656273913074	-3.85978906917633	7.55547891766001	0.00536573883694071	0.0450751395443053	-0.138813485078417	-0.0343119931830629	0.0224268056050048
HL	chr2:227172748	COL4A3	-	0.551081189931713	0.63862363127069	-0.0875424413389772	-3.4169143693982	11.4635402949742	0.0054357686403067	0.0454420031810115	-0.143655433596449	-0.0314294490815051	0.0256203205216394
SV	chr3:79389106	ROBO1	+	0.600564911279197	0.739682753345427	-0.13911784206623	-3.48884729350341	10.159336456571	0.00569832773244183	0.0467415226908642	-0.227776395706873	-0.0504592884255864	0.0398750161193014
HL, SMD	chr10:54603553	PCDH15	-	0.56517193124336	0.646037172703839	-0.0808652414604796	-3.67179401679309	7.98199967042857	0.00631778543099075	0.0497905928631741	-0.131671142757916	-0.0300593401630433	0.0220233599953155
† mean MD - mean methylation in MD patients; Mean Control - mean methylation in controls; ∆Mean - difference in methylation between MD patients and controls; DF - degrees of freedom; CI_1 - lower bound of confidence interval; CI_2 - higher bound of confidence interval; SE - standard error
