# Supplementary material for: DNA Methylation Signature in Mononuclear Cells and Proinflammatory Cytokines May Define Molecular Subtypes in Sporadic Meniere Disease
Source: Preprints.org preprint supplement (doi:10.20944/preprints202110.0030.v1), 2021-10-01
Supplement: Supplementary file 3 [file Table_S12.xls]

## Sheet: Folha1
Gene Set	Comparison	mean_1	mean_2	∆Mean	t-test	DF	p-value	CI_1	CI_2	SE
HL	MDvC	0.62815374793624	0.637812718559792	-0.00965897062355259	-8.08500899131571	9472.71195000057	6.97817669883729e-16	-0.0120007928516369	-0.00731714839546824	0.00119467654691881
	MDHvC	0.625807533212416	0.637812718652293	-0.0120051854398771	-9.85071376417835	9471.76216040119	8.7557157805426e-23	-0.0143941228119663	-0.00961624806778781	0.00121871224027779
	MDLvC	0.630499962679303	0.637812718559792	-0.00731275588048919	-6.17431338404179	9463.45263582733	6.91827844070188e-10	-0.00963440213216074	-0.00499110962881763	0.00118438365946727
	MDLvMDH	0.630499962679303	0.625807533193177	0.0046924294861268	3.91828243609187	9444.75099293641	8.98111030500602e-05	0.00234492858355388	0.00703993038869972	0.00119757305979379
SV	MDvC	0.624034238577747	0.633321666896954	-0.00928742831920715	-7.63386323443408	10795.4480895382	2.47051909922589e-14	-0.0116722059302783	-0.00690265070813598	0.00121660921004117
	MDHvC	0.621934091719269	0.633321666963995	-0.0113875752447261	-9.2284940622794	10815.052690956	3.25546599454562e-20	-0.0138063594286431	-0.00896879106080916	0.00123395812663214
	MDLvC	0.626134385608674	0.633321666896954	-0.00718728128828028	-5.92427069314835	10789.2684927933	3.23267178841421e-09	-0.00956536184308339	-0.00480920073347716	0.00121319258699516
	MDLvMDH	0.626134385608674	0.62193409154682	0.00420029406185363	3.492130341219	10804.6690005998	0.00048109954890814	0.00184260789363779	0.00655798023006947	0.0012027884561684
SMD	MDvC	0.625545001546189	0.635945671414785	-0.0104006698685957	-6.3759072269876	4425.6517397715	2.00471904700204e-10	-0.0135987268942448	-0.00720261284294658	0.00163124548371285
	MDHvC	0.623257307000903	0.635945672041554	-0.0126883650406504	-7.61334177654688	4421.04617478493	3.24543291877441e-14	-0.015955727713106	-0.00942100236819486	0.00166659601171949
	MDLvC	0.627832694716838	0.635945671414785	-0.00811297669794642	-5.00844515793297	4423.63877745115	5.70088068059486e-07	-0.0112887115941321	-0.00493724180176077	0.00161985934598807
	MDLvMDH	0.627832694716838	0.62325730837554	0.0045753863412985	2.77580760437062	4411.89923595839	0.00552968993331495	0.00134387516892649	0.00780689751367052	0.00164830816591696
† mean 1 - mean methylation of first term in comparison; Mean Control - mean methylation of second term in comparison; ∆Mean - difference in methylation between mean_1 and mean_2; DF - degrees of freedom; CI_1 - lower bound of confidence interval; CI_2 - higher bound of confidence interval; SE - standard error
