# Supplementary material for: DNA Methylation Signature in Mononuclear Cells and Proinflammatory Cytokines May Define Molecular Subtypes in Sporadic Meniere Disease
Source: Preprints.org preprint supplement (doi:10.20944/preprints202110.0030.v1), 2021-10-01
Supplement: Supplementary file 4 [file Table_S13.xls]

## Sheet: Folha1
DMC	Representation	term	category	ontology	nDMInCat	nInCat	ratio	padjust
All	over	intrinsic component of membrane	GO:0031224	CC	582	3011	0.193291265360345	0.0000316060577884013
		plasma membrane	GO:0005886	CC	631	3095	0.203877221324717	0.0000316060577884013
		plasma membrane part	GO:0044459	CC	399	1747	0.228391528334287	0.0000316060577884013
		integral component of membrane	GO:0016021	CC	563	2928	0.192281420765027	0.0000316060577884013
		cell periphery	GO:0071944	CC	643	3170	0.202839116719243	0.0000316060577884013
		membrane part	GO:0044425	CC	713	3822	0.186551543694401	0.0000382268519336924
		intrinsic component of plasma membrane	GO:0031226	CC	249	1043	0.238734419942474	0.000275098350060581
		integral component of plasma membrane	GO:0005887	CC	237	1003	0.23629112662014	0.000879622262459515
	under	organelle organization	GO:0006996	BP	300	2273	0.131984161900572	0.00789660420601888
		intracellular	GO:0005622	CC	1183	8204	0.14419795221843	0.00593949651948751
		organelle	GO:0043226	CC	1100	7709	0.142690361914645	0.00557964803498534
		nucleic acid metabolic process	GO:0090304	BP	347	2900	0.119655172413793	0.00541718587374808
		intracellular part	GO:0044424	CC	1181	8198	0.144059526713833	0.00541718587374808
		nucleus	GO:0005634	CC	536	4136	0.129593810444874	0.00340548272418585
		organic cyclic compound metabolic process	GO:1901360	BP	422	3516	0.120022753128555	0.0033443821522908
		nuclear body	GO:0016604	CC	38	472	0.0805084745762712	0.00476336417691674
		organic substance metabolic process	GO:0071704	BP	817	6208	0.131604381443299	0.00223640455267199
		macromolecule metabolic process	GO:0043170	BP	699	5285	0.132261116367077	0.00223640455267199
		cellular macromolecule metabolic process	GO:0044260	BP	611	4657	0.131200343568821	0.00207996541651436
		metabolic process	GO:0008152	BP	855	6478	0.1319851806113	0.00149465372453497
		intracellular organelle	GO:0043229	CC	1005	7228	0.139042612064195	0.00149465372453497
		intracellular membrane-bounded organelle	GO:0043231	CC	814	6186	0.131587455544779	0.00149465372453497
		primary metabolic process	GO:0044238	BP	781	6005	0.130058284762698	0.00149465372453497
		organelle part	GO:0044422	CC	752	5523	0.136157885207315	0.00129601538067861
		nucleoplasm part	GO:0044451	CC	59	675	0.0874074074074074	0.00149465372453497
		cellular aromatic compound metabolic process	GO:0006725	BP	403	3395	0.118703976435935	0.000915225924740598
		cellular metabolic process	GO:0044237	BP	786	6061	0.129681570697905	0.000789922097899417
		heterocycle metabolic process	GO:0046483	BP	397	3363	0.11804936068986	0.000567549033251506
		nucleobase-containing compound metabolic process	GO:0006139	BP	385	3278	0.11744966442953	0.000558894056247896
		intracellular organelle part	GO:0044446	CC	703	5331	0.131870193209529	0.000376828297889154
		cellular nitrogen compound metabolic process	GO:0034641	BP	427	3637	0.117404454220511	0.000376762662565961
		nitrogen compound metabolic process	GO:0006807	BP	726	5697	0.127435492364402	0.000160718089567263
		membrane-enclosed lumen	GO:0031974	CC	340	2980	0.114093959731544	0.0000868234560631698
		organelle lumen	GO:0043233	CC	340	2980	0.114093959731544	0.0000868234560631698
		intracellular organelle lumen	GO:0070013	CC	340	2980	0.114093959731544	0.0000868234560631698
		nucleoplasm	GO:0005654	CC	223	2058	0.108357628765792	0.000054853964317949
		nuclear lumen	GO:0031981	CC	263	2385	0.110272536687631	6.30613521940181E-06
		nuclear part	GO:0044428	CC	289	2611	0.110685561087706	0
Hypothemhylated	over	cell periphery	GO:0071944	CC	607	3170	0.191482649842271	1.90478639511001E-06
		plasma membrane	GO:0005886	CC	595	3095	0.192245557350565	1.90478639511001E-06
		plasma membrane part	GO:0044459	CC	379	1747	0.216943331425301	2.71836025218908E-06
		intrinsic component of membrane	GO:0031224	CC	542	3011	0.180006642311524	3.52878168223073E-06
		membrane part	GO:0044425	CC	666	3822	0.17425431711146	3.83352787786111E-06
		integral component of membrane	GO:0016021	CC	524	2928	0.17896174863388	8.38245387323829E-06
		intrinsic component of plasma membrane	GO:0031226	CC	237	1043	0.227229146692234	0.0000434786739932608
		integral component of plasma membrane	GO:0005887	CC	226	1003	0.225324027916251	0.000129918720111235
	under	regulation of cellular macromolecule biosynthetic process	GO:2000112	BP	240	2187	0.109739368998628	0.0494141438780285
		organonitrogen compound metabolic process	GO:1901564	BP	459	3892	0.117934224049332	0.0462554507927719
		regulation of biosynthetic process	GO:0009889	BP	261	2410	0.108298755186722	0.0445390916951205
		regulation of cellular biosynthetic process	GO:0031326	BP	255	2363	0.107913669064748	0.0297691049978366
		nucleic acid binding	GO:0003676	MF	223	2242	0.0994647636039251	0.0297691049978366
		regulation of macromolecule biosynthetic process	GO:0010556	BP	246	2259	0.108897742363878	0.0244741304682612
		aromatic compound biosynthetic process	GO:0019438	BP	259	2420	0.10702479338843	0.0221154115257095
		chromosome organization	GO:0051276	BP	68	702	0.0968660968660969	0.0256066822146365
		nucleobase-containing compound biosynthetic process	GO:0034654	BP	253	2377	0.106436684896929	0.0187748838804369
		regulation of nucleobase-containing compound metabolic process	GO:0019219	BP	252	2306	0.10928013876843	0.0174948717278709
		heterocycle biosynthetic process	GO:0018130	BP	256	2407	0.106356460324055	0.0155528944221241
		regulation of cellular metabolic process	GO:0031323	BP	400	3506	0.114090131203651	0.00847889539506429
		regulation of metabolic process	GO:0019222	BP	436	3790	0.115039577836412	0.00775308336897631
		cellular nitrogen compound biosynthetic process	GO:0044271	BP	285	2708	0.105243722304284	0.00731724314197086
		regulation of nitrogen compound metabolic process	GO:0051171	BP	376	3323	0.113150767378875	0.00708039495650721
		gene expression	GO:0010467	BP	326	3007	0.108413701363485	0.00701496034173451
		regulation of macromolecule metabolic process	GO:0060255	BP	399	3477	0.114754098360656	0.00653372445904829
		biosynthetic process	GO:0009058	BP	379	3495	0.108440629470672	0.00653372445904829
		regulation of primary metabolic process	GO:0080090	BP	386	3432	0.112470862470862	0.00653372445904829
		membrane-bounded organelle	GO:0043227	CC	875	7057	0.123990364177412	0.00600684364199517
		organelle organization	GO:0006996	BP	270	2273	0.118785745710515	0.00600684364199517
		organic substance biosynthetic process	GO:1901576	BP	372	3456	0.107638888888889	0.00347061343985309
		cellular biosynthetic process	GO:0044249	BP	364	3402	0.106995884773663	0.00280693849301541
		RNA metabolic process	GO:0016070	BP	266	2568	0.103582554517134	0.00266742843027985
		organelle	GO:0043226	CC	996	7709	0.12919963678817	0.00193219303108629
		cellular macromolecule biosynthetic process	GO:0034645	BP	285	2701	0.105516475379489	0.00142857609757411
		nuclear body	GO:0016604	CC	32	472	0.0677966101694915	0.00171910847740585
		macromolecule biosynthetic process	GO:0009059	BP	293	2777	0.105509542671948	0.000895793678530432
		intracellular	GO:0005622	CC	1067	8204	0.130058508044856	0.000516983062441151
		intracellular part	GO:0044424	CC	1065	8198	0.129909734081483	0.000415012001475279
		metabolic process	GO:0008152	BP	769	6478	0.118709478234023	0.000324383933902049
		organic cyclic compound metabolic process	GO:1901360	BP	372	3516	0.10580204778157	0.000324383933902049
		organic substance metabolic process	GO:0071704	BP	732	6208	0.117912371134021	0.000324383933902049
		organelle part	GO:0044422	CC	678	5523	0.122759369907659	0.000324383933902049
		nucleoplasm part	GO:0044451	CC	50	675	0.0740740740740741	0.000324383933902049
		primary metabolic process	GO:0044238	BP	700	6005	0.116569525395504	0.000233740730944413
		intracellular organelle	GO:0043229	CC	904	7228	0.125069175428888	0.000157916631851201
		nucleic acid metabolic process	GO:0090304	BP	299	2900	0.103103448275862	0.000138224359874535
		macromolecule metabolic process	GO:0043170	BP	620	5285	0.117313150425733	0.000100445134166453
		cellular metabolic process	GO:0044237	BP	704	6061	0.116152450090744	0.0000995580838091348
		nucleus	GO:0005634	CC	470	4136	0.113636363636364	0.0000995580838091348
		cellular macromolecule metabolic process	GO:0044260	BP	539	4657	0.115739746617994	0.0000756248018507211
		cellular aromatic compound metabolic process	GO:0006725	BP	354	3395	0.104270986745214	0.0000649124528670484
		intracellular organelle part	GO:0044446	CC	630	5331	0.118176702307259	0.0000499902345656126
		intracellular membrane-bounded organelle	GO:0043231	CC	723	6186	0.116876818622696	0.0000499902345656126
		nucleobase-containing compound metabolic process	GO:0006139	BP	337	3278	0.102806589383771	0.0000294259598818199
		heterocycle metabolic process	GO:0046483	BP	347	3363	0.103181683021112	0.0000269302169282973
		cellular nitrogen compound metabolic process	GO:0034641	BP	376	3637	0.103381908166071	0.0000269302169282973
		nitrogen compound metabolic process	GO:0006807	BP	647	5697	0.113568544848166	0.0000115204794881444
		membrane-enclosed lumen	GO:0031974	CC	299	2980	0.100335570469799	8.58060015331681E-06
		organelle lumen	GO:0043233	CC	299	2980	0.100335570469799	8.58060015331681E-06
		intracellular organelle lumen	GO:0070013	CC	299	2980	0.100335570469799	8.58060015331681E-06
		nucleoplasm	GO:0005654	CC	195	2058	0.0947521865889213	8.05654504806614E-06
		nuclear part	GO:0044428	CC	254	2611	0.0972807353504404	0
		nuclear lumen	GO:0031981	CC	230	2385	0.0964360587002096	0
hypermethylated	over	homophilic cell adhesion via plasma membrane adhesion molecules	GO:0007156	BP	18	120	0.15	0.0322643295263774
† representation - differentially methylated genes in the category than we would expect given the size of the category and the gene length distribution.by chance; nDMInCat - number if genes with DMCs; nInCat - number of genes in category; p,adjust - adjusted p-value; CC- cellular component; MF - molecular function; BP - biological process
