# Supplementary material for: DNA Methylation Signature in Mononuclear Cells and Proinflammatory Cytokines May Define Molecular Subtypes in Sporadic Meniere Disease
Source: Preprints.org preprint supplement (doi:10.20944/preprints202110.0030.v1), 2021-10-01
Supplement: Supplementary file 5 [file Table_S14.xls]

## Sheet: Folha1
DMC	Representation	term	category	ontology	nDMInCat	nInCat	ratio	padjust
all	over	plasma membrane	GO:0005886	CC	933	3095	0.301453957996769	5.13363074070406e-10
		cell periphery	GO:0071944	CC	950	3170	0.299684542586751	5.13363074070406e-10
		intrinsic component of membrane	GO:0031224	CC	852	3011	0.282962470939887	1.60371622070491e-08
		integral component of membrane	GO:0016021	CC	823	2928	0.281079234972678	1.23192452901328e-07
		membrane part	GO:0044425	CC	1045	3822	0.273417059131345	1.80071649762922e-07
		intrinsic component of plasma membrane	GO:0031226	CC	355	1043	0.340364333652924	5.6562357452149e-07
		integral component of plasma membrane	GO:0005887	CC	340	1003	0.338983050847458	1.64417547974907e-06
		plasma membrane part	GO:0044459	CC	557	1747	0.318832283915283	1.64417547974907e-06
		synaptic membrane	GO:0097060	CC	146	298	0.48993288590604	0.000196061659381406
		cell projection	GO:0042995	CC	476	1410	0.337588652482269	0.00343334951845285
		postsynaptic membrane	GO:0045211	CC	113	226	0.5	0.00481480189797984
		membrane	GO:0016020	CC	1342	5233	0.256449455379324	0.00521641893246406
		regulation of membrane potential	GO:0042391	BP	121	265	0.456603773584906	0.00629873066274069
		plasma membrane bounded cell projection	GO:0120025	CC	459	1359	0.337748344370861	0.00766936665307177
		synapse	GO:0045202	CC	290	762	0.380577427821522	0.0079134128421621
		metal ion transmembrane transporter activity	GO:0046873	MF	120	305	0.39344262295082	0.0079134128421621
		presynaptic membrane	GO:0042734	CC	63	112	0.5625	0.0079134128421621
		synapse part	GO:0044456	CC	238	612	0.388888888888889	0.0079134128421621
		neuron part	GO:0097458	CC	391	1120	0.349107142857143	0.00895717844520052
		neuron projection	GO:0043005	CC	302	837	0.360812425328554	0.0177840559104063
		plasma membrane protein complex	GO:0098797	CC	146	379	0.385224274406332	0.0220940852596361
		glutamate receptor signaling pathway	GO:0007215	BP	45	73	0.616438356164384	0.0255398166210523
		regulation of biological quality	GO:0065008	BP	662	2355	0.281104033970276	0.0255398166210523
		system process	GO:0003008	BP	331	1116	0.296594982078853	0.0471775760078913
		cell junction	GO:0030054	CC	279	817	0.341493268053856	0.0482898031886906
	under	transcription by RNA polymerase II	GO:0006366	BP	299	1587	0.188405797101449	0.048699526170662
		regulation of transcription, DNA-templated	GO:0006355	BP	375	1931	0.194199896426722	0.0451344246212515
		regulation of gene expression	GO:0010468	BP	500	2508	0.199362041467305	0.0418003562329146
		chromatin organization	GO:0006325	BP	74	432	0.171296296296296	0.0480640902127537
		cellular protein catabolic process	GO:0044257	BP	71	453	0.15673289183223	0.0475499633603941
		mitotic cell cycle	GO:0000278	BP	105	595	0.176470588235294	0.0422513650122489
		DNA binding	GO:0003677	MF	254	1400	0.181428571428571	0.0375212572218847
		proteolysis involved in cellular protein catabolic process	GO:0051603	BP	65	423	0.153664302600473	0.0422117372713534
		cofactor metabolic process	GO:0051186	BP	38	330	0.115151515151515	0.045661739272533
		peptidyl-lysine modification	GO:0018205	BP	31	236	0.13135593220339	0.0475499633603941
		transferase activity	GO:0016740	MF	299	1457	0.205216197666438	0.0314324524475529
		ubiquitin ligase complex	GO:0000151	CC	24	191	0.12565445026178	0.0464874787573899
		microtubule organizing center	GO:0005815	CC	94	485	0.193814432989691	0.0343218226761941
		ubiquitin-like protein ligase binding	GO:0044389	MF	22	169	0.130177514792899	0.0451344246212515
		cell division	GO:0051301	BP	58	366	0.158469945355191	0.0347891757239698
		cytoplasmic part	GO:0044444	CC	1207	5607	0.215266630996968	0.0262450949554504
		regulation of nucleic acid-templated transcription	GO:1903506	BP	381	1971	0.193302891933029	0.0262450949554504
		viral process	GO:0016032	BP	63	453	0.139072847682119	0.0314324524475529
		pyridine nucleotide metabolic process	GO:0019362	BP	8	121	0.0661157024793388	0.0480640902127537
		nicotinamide nucleotide metabolic process	GO:0046496	BP	8	121	0.0661157024793388	0.0480640902127537
		regulation of RNA metabolic process	GO:0051252	BP	412	2120	0.194339622641509	0.0208714050614016
		regulation of RNA biosynthetic process	GO:2001141	BP	381	1975	0.192911392405063	0.0208714050614016
		cellular macromolecule catabolic process	GO:0044265	BP	102	630	0.161904761904762	0.0238252980125552
		coenzyme metabolic process	GO:0006732	BP	26	249	0.104417670682731	0.0307255929796365
		nucleocytoplasmic transport	GO:0006913	BP	19	206	0.0922330097087379	0.0314324524475529
		cellular macromolecule localization	GO:0070727	BP	205	1117	0.183527305282005	0.020190264366157
		nuclear transport	GO:0051169	BP	19	207	0.0917874396135266	0.0311255628276574
		ubiquitin protein ligase binding	GO:0031625	MF	20	162	0.123456790123457	0.0296806289487626
		centrosome	GO:0005813	CC	59	344	0.171511627906977	0.020190264366157
		cellular protein localization	GO:0034613	BP	203	1110	0.182882882882883	0.0166459268153015
		modification-dependent macromolecule catabolic process	GO:0043632	BP	57	383	0.148825065274151	0.0190740110372385
		regulation of cellular macromolecule biosynthetic process	GO:2000112	BP	424	2187	0.19387288523091	0.0131055058633294
		ribonucleoprotein complex subunit organization	GO:0071826	BP	9	146	0.0616438356164384	0.028779361034524
		ribonucleoprotein complex assembly	GO:0022618	BP	8	135	0.0592592592592593	0.0296806289487626
		organelle organization	GO:0006996	BP	481	2273	0.21161460624725	0.012596782218564
		ubiquitin-dependent protein catabolic process	GO:0006511	BP	55	374	0.147058823529412	0.0166562699756123
		transcription, DNA-templated	GO:0006351	BP	385	2025	0.190123456790123	0.012596782218564
		organic cyclic compound binding	GO:0097159	MF	704	3530	0.19943342776204	0.0121695086835755
		chromosomal region	GO:0098687	CC	27	217	0.124423963133641	0.0189632729615941
		modification-dependent protein catabolic process	GO:0019941	BP	55	376	0.146276595744681	0.0157002333558835
		cell cycle process	GO:0022402	BP	145	812	0.178571428571429	0.0123425841415562
		protein localization to organelle	GO:0033365	BP	78	523	0.149139579349904	0.0131055058633294
		cytoplasm	GO:0005737	CC	1462	6609	0.22121349674686	0.0098421401855604
		chromosome organization	GO:0051276	BP	126	702	0.179487179487179	0.0102806704467718
		nucleic acid-templated transcription	GO:0097659	BP	390	2055	0.18978102189781	0.00864771192329804
		RNA biosynthetic process	GO:0032774	BP	391	2065	0.189346246973366	0.00695305768216802
		chromosomal part	GO:0044427	CC	86	548	0.156934306569343	0.0077674178996443
		binding	GO:0005488	MF	1881	8433	0.223052294557097	0.00644955757149695
		protein ubiquitination	GO:0016567	BP	76	504	0.150793650793651	0.0075864856199915
		heterocyclic compound binding	GO:1901363	MF	690	3480	0.198275862068966	0.00591920508810592
		cellular response to DNA damage stimulus	GO:0006974	BP	81	505	0.16039603960396	0.00704426730222022
		protein binding	GO:0005515	MF	1461	6658	0.219435265845599	0.00481513031709634
		intracellular non-membrane-bounded organelle	GO:0043232	CC	521	2455	0.212219959266802	0.00442364272803045
		regulation of macromolecule biosynthetic process	GO:0010556	BP	434	2259	0.192120407259849	0.00432589748934626
		ribonucleoprotein complex biogenesis	GO:0022613	BP	19	241	0.0788381742738589	0.00685661769067027
		cellular response to stress	GO:0033554	BP	214	1179	0.181509754028838	0.00367442061614794
		non-membrane-bounded organelle	GO:0043228	CC	521	2460	0.211788617886179	0.00314598173849567
		regulation of cellular biosynthetic process	GO:0031326	BP	448	2363	0.189589504866695	0.00314419245215792
		regulation of biosynthetic process	GO:0009889	BP	454	2410	0.188381742738589	0.00209704917773935
		regulation of nucleobase-containing compound metabolic process	GO:0019219	BP	443	2306	0.192107545533391	0.00209704917773935
		DNA repair	GO:0006281	BP	46	339	0.135693215339233	0.0029387409729115
		regulation of cell cycle	GO:0051726	BP	107	678	0.157817109144543	0.00226824373063783
		transferase complex	GO:1990234	CC	72	503	0.143141153081511	0.00225654770243851
		organic cyclic compound biosynthetic process	GO:1901362	BP	468	2502	0.18705035971223	0.00141176710024832
		RNA binding	GO:0003723	MF	122	885	0.137853107344633	0.00149916549020468
		catalytic complex	GO:1902494	CC	131	830	0.157831325301205	0.00127523705733215
		regulation of macromolecule metabolic process	GO:0060255	BP	695	3477	0.199884958297383	0.000987484980075444
		protein metabolic process	GO:0019538	BP	665	3299	0.201576235222795	0.000713413597846398
		protein modification by small protein conjugation	GO:0032446	BP	81	560	0.144642857142857	0.000864527574646798
		RNA processing	GO:0006396	BP	60	511	0.117416829745597	0.000653605822553575
		regulation of metabolic process	GO:0019222	BP	750	3790	0.197889182058047	0.000256531141489221
		aromatic compound biosynthetic process	GO:0019438	BP	447	2420	0.184710743801653	0.000259673096172381
		nucleobase-containing compound biosynthetic process	GO:0034654	BP	438	2377	0.184265881363063	0.000256531141489221
		nucleic acid binding	GO:0003676	MF	387	2242	0.172613737734166	0.000222371908754427
		chromosome	GO:0005694	CC	95	629	0.151033386327504	0.000255891861012151
		heterocycle biosynthetic process	GO:0018130	BP	443	2407	0.184046530951392	0.000199775049416185
		gene expression	GO:0010467	BP	566	3007	0.188227469238444	0.000184288725312304
		cell cycle	GO:0007049	BP	185	1078	0.171614100185529	0.000198851259851782
		cytosol	GO:0005829	CC	612	3014	0.203052422030524	0.000121440446780853
		cellular biosynthetic process	GO:0044249	BP	640	3402	0.188124632569077	0.000104821143449237
		biosynthetic process	GO:0009058	BP	657	3495	0.187982832618026	7.30847156916486e-05
		cellular macromolecule biosynthetic process	GO:0034645	BP	504	2701	0.18659755646057	6.98547048627825e-05
		organic substance biosynthetic process	GO:1901576	BP	648	3456	0.1875	5.33377572934203e-05
		protein modification by small protein conjugation or removal	GO:0070647	BP	98	678	0.144542772861357	6.7418586885085e-05
		regulation of nitrogen compound metabolic process	GO:0051171	BP	644	3323	0.193800782425519	5.19152999031951e-05
		regulation of primary metabolic process	GO:0080090	BP	662	3432	0.192890442890443	4.19162045852814e-05
		macromolecule modification	GO:0043412	BP	501	2530	0.19802371541502	4.19162045852814e-05
		organonitrogen compound metabolic process	GO:1901564	BP	763	3892	0.196043165467626	4.19162045852814e-05
		macromolecule biosynthetic process	GO:0009059	BP	518	2777	0.186532229024127	4.19162045852814e-05
		regulation of cellular metabolic process	GO:0031323	BP	680	3506	0.193953223046206	4.1251949593143e-05
		RNA metabolic process	GO:0016070	BP	465	2568	0.18107476635514	3.00727369610056e-05
		cellular protein metabolic process	GO:0044267	BP	573	2946	0.194501018329939	2.63816010281974e-05
		cellular protein modification process	GO:0006464	BP	475	2412	0.196932006633499	2.56743514212793e-05
		protein modification process	GO:0036211	BP	475	2412	0.196932006633499	2.56743514212793e-05
		cellular nitrogen compound biosynthetic process	GO:0044271	BP	489	2708	0.180576070901034	2.0162562588117e-05
		nuclear body	GO:0016604	CC	59	472	0.125	2.0162562588117e-05
		nucleoplasm part	GO:0044451	CC	89	675	0.131851851851852	4.20730624724975e-07
		metabolic process	GO:0008152	BP	1307	6478	0.201759802408151	1.30200021104269e-07
		macromolecule metabolic process	GO:0043170	BP	1058	5285	0.200189214758751	6.08282708594237e-08
		intracellular membrane-bounded organelle	GO:0043231	CC	1190	6186	0.192369867442612	0
		nuclear lumen	GO:0031981	CC	394	2385	0.165199161425577	0
		intracellular organelle	GO:0043229	CC	1482	7228	0.205035971223022	0
		nuclear part	GO:0044428	CC	441	2611	0.168900804289544	0
		nucleoplasm	GO:0005654	CC	329	2058	0.159863945578231	0
		membrane-enclosed lumen	GO:0031974	CC	504	2980	0.169127516778524	0
		organelle lumen	GO:0043233	CC	504	2980	0.169127516778524	0
		intracellular organelle lumen	GO:0070013	CC	504	2980	0.169127516778524	0
		nucleus	GO:0005634	CC	772	4136	0.186653771760155	0
		nitrogen compound metabolic process	GO:0006807	BP	1096	5697	0.192381955415131	0
		intracellular part	GO:0044424	CC	1749	8198	0.213344718223957	0
		intracellular	GO:0005622	CC	1753	8204	0.213676255485129	0
		cellular nitrogen compound metabolic process	GO:0034641	BP	642	3637	0.176519109155898	0
		heterocycle metabolic process	GO:0046483	BP	594	3363	0.176628010704728	0
		nucleobase-containing compound metabolic process	GO:0006139	BP	577	3278	0.176021964612569	0
		cellular metabolic process	GO:0044237	BP	1189	6061	0.196172248803828	0
		cellular aromatic compound metabolic process	GO:0006725	BP	604	3395	0.177908689248895	0
		intracellular organelle part	GO:0044446	CC	1060	5331	0.198836991183643	0
		cellular macromolecule metabolic process	GO:0044260	BP	910	4657	0.195404767017393	0
		primary metabolic process	GO:0044238	BP	1181	6005	0.196669442131557	0
		organelle	GO:0043226	CC	1638	7709	0.21247892074199	0
		membrane-bounded organelle	GO:0043227	CC	1444	7057	0.204619526711067	0
		organic cyclic compound metabolic process	GO:1901360	BP	633	3516	0.180034129692833	0
		nucleic acid metabolic process	GO:0090304	BP	517	2900	0.178275862068966	0
		organelle part	GO:0044422	CC	1130	5523	0.204598949846098	0
		organic substance metabolic process	GO:0071704	BP	1242	6208	0.200064432989691	0
Hypomethylated	over	plasma membrane	GO:0005886	CC	865	3095	0.279483037156704	3.69218109409393e-13
		cell periphery	GO:0071944	CC	880	3170	0.277602523659306	3.69218109409393e-13
		intrinsic component of membrane	GO:0031224	CC	784	3011	0.260378611756891	8.73351003715983e-11
		membrane part	GO:0044425	CC	960	3822	0.251177394034537	5.8730998153937e-10
		integral component of membrane	GO:0016021	CC	756	2928	0.258196721311475	8.66831434926884e-10
		intrinsic component of plasma membrane	GO:0031226	CC	339	1043	0.325023969319271	8.66831434926884e-10
		plasma membrane part	GO:0044459	CC	528	1747	0.302232398397252	8.66831434926884e-10
		integral component of plasma membrane	GO:0005887	CC	324	1003	0.323030907278166	5.02841181692518e-09
		synaptic membrane	GO:0097060	CC	140	298	0.469798657718121	2.5622444197054e-05
		cell projection	GO:0042995	CC	442	1410	0.313475177304965	0.000123707164123383
		membrane	GO:0016020	CC	1213	5233	0.231798203707242	0.000139833354599438
		postsynaptic membrane	GO:0045211	CC	110	226	0.486725663716814	0.000236489556286575
		plasma membrane bounded cell projection	GO:0120025	CC	427	1359	0.31420161883738	0.000237850625718738
		extracellular region	GO:0005576	CC	512	2193	0.233470132238942	0.000245155570841294
		metal ion transmembrane transporter activity	GO:0046873	MF	115	305	0.377049180327869	0.000346972868562266
		neuron projection	GO:0043005	CC	286	837	0.341696535244922	0.000346972868562266
		system process	GO:0003008	BP	313	1116	0.280465949820789	0.000384997543787695
		neuron part	GO:0097458	CC	364	1120	0.325	0.000452344701060371
		synapse	GO:0045202	CC	271	762	0.355643044619423	0.000601570496832715
		regulation of membrane potential	GO:0042391	BP	115	265	0.433962264150943	0.000601570496832715
		synapse part	GO:0044456	CC	222	612	0.362745098039216	0.0019901959037123
		plasma membrane protein complex	GO:0098797	CC	138	379	0.364116094986807	0.00334188318411684
		signaling receptor activity	GO:0038023	MF	186	683	0.272327964860908	0.00334188318411684
		regulation of biological quality	GO:0065008	BP	605	2355	0.256900212314225	0.00334188318411684
		transmembrane signaling receptor activity	GO:0004888	MF	154	550	0.28	0.00338628898623899
		dendritic tree	GO:0097447	CC	149	396	0.376262626262626	0.00371281450245751
		dendrite	GO:0030425	CC	148	395	0.374683544303797	0.00380241861618519
		inorganic molecular entity transmembrane transporter activity	GO:0015318	MF	162	516	0.313953488372093	0.00489631979516408
		substrate-specific channel activity	GO:0022838	MF	109	280	0.389285714285714	0.0055003321075554
		ion gated channel activity	GO:0022839	MF	91	220	0.413636363636364	0.0055003321075554
		inorganic cation transmembrane transporter activity	GO:0022890	MF	129	389	0.331619537275064	0.0055003321075554
		presynaptic membrane	GO:0042734	CC	59	112	0.526785714285714	0.0055003321075554
		multicellular organismal process	GO:0032501	BP	998	4125	0.241939393939394	0.00583870394905913
		ion transmembrane transporter activity	GO:0015075	MF	171	552	0.309782608695652	0.00590206963185548
		plasma membrane region	GO:0098590	CC	256	799	0.320400500625782	0.00590206963185548
		transmembrane transporter complex	GO:1902495	CC	96	216	0.444444444444444	0.00590206963185548
		transmembrane transporter activity	GO:0022857	MF	192	639	0.300469483568075	0.00590206963185548
		channel activity	GO:0015267	MF	110	289	0.380622837370242	0.00590206963185548
		ion transport	GO:0006811	BP	289	1006	0.28727634194831	0.00590206963185548
		gated channel activity	GO:0022836	MF	92	226	0.407079646017699	0.00590206963185548
		ion channel complex	GO:0034702	CC	94	206	0.456310679611651	0.00590206963185548
		ion channel activity	GO:0005216	MF	107	273	0.391941391941392	0.00624549677592066
		passive transmembrane transporter activity	GO:0022803	MF	110	290	0.379310344827586	0.006658714813468
		transporter activity	GO:0005215	MF	205	693	0.295815295815296	0.00695193147114365
		molecular transducer activity	GO:0060089	MF	192	713	0.269284712482468	0.00782173149167181
		chemical synaptic transmission	GO:0007268	BP	159	444	0.358108108108108	0.00782173149167181
		anterograde trans-synaptic signaling	GO:0098916	BP	159	444	0.358108108108108	0.00782173149167181
		glutamate receptor signaling pathway	GO:0007215	BP	43	73	0.589041095890411	0.00867934632119218
		somatodendritic compartment	GO:0036477	CC	180	527	0.341555977229602	0.00867934632119218
		transporter complex	GO:1990351	CC	96	219	0.438356164383562	0.00867934632119218
		postsynapse	GO:0098794	CC	161	405	0.397530864197531	0.00943761393800375
		cell junction	GO:0030054	CC	257	817	0.314565483476132	0.0111833170443302
		trans-synaptic signaling	GO:0099537	BP	160	449	0.356347438752784	0.0111833170443302
		synaptic signaling	GO:0099536	BP	161	452	0.356194690265487	0.0126281110532836
		cation transmembrane transporter activity	GO:0008324	MF	132	414	0.318840579710145	0.0127465259437636
		cation channel activity	GO:0005261	MF	87	218	0.399082568807339	0.0137652350131807
		cation channel complex	GO:0034703	CC	74	156	0.474358974358974	0.0138453578549209
		G protein-coupled receptor signaling pathway	GO:0007186	BP	159	559	0.284436493738819	0.0146221853112072
		presynapse	GO:0098793	CC	116	325	0.356923076923077	0.0166747158215007
		G protein-coupled receptor activity	GO:0004930	MF	74	280	0.264285714285714	0.0166747158215007
		intrinsic component of synaptic membrane	GO:0099240	CC	55	113	0.486725663716814	0.0213969934750286
		monovalent inorganic cation transmembrane transporter activity	GO:0015077	MF	79	240	0.329166666666667	0.0238467411661569
		cell-cell signaling	GO:0007267	BP	278	978	0.284253578732106	0.0270395039516922
		cell projection part	GO:0044463	CC	297	950	0.312631578947368	0.0271493707988602
		plasma membrane bounded cell projection part	GO:0120038	CC	297	950	0.312631578947368	0.0271493707988602
		nervous system process	GO:0050877	BP	194	684	0.283625730994152	0.0271806413892988
		cation transport	GO:0006812	BP	200	682	0.293255131964809	0.0336542291774073
		postsynaptic density membrane	GO:0098839	CC	35	55	0.636363636363636	0.0426900480538254
		extracellular matrix	GO:0031012	CC	85	286	0.297202797202797	0.0438382815495272
		sodium ion transmembrane transporter activity	GO:0015081	MF	43	114	0.37719298245614	0.0487732967416687
		cell adhesion	GO:0007155	BP	261	874	0.29862700228833	0.0487732967416687
		voltage-gated ion channel activity	GO:0005244	MF	53	123	0.430894308943089	0.0496264289863301
		voltage-gated channel activity	GO:0022832	MF	53	123	0.430894308943089	0.0496264289863301
		biological adhesion	GO:0022610	BP	261	877	0.297605473204105	0.0496264289863301
	under	negative regulation of metabolic process	GO:0009892	BP	274	1624	0.16871921182266	0.0463490811572679
		positive regulation of RNA biosynthetic process	GO:1902680	BP	145	875	0.165714285714286	0.0494578946721113
		nucleolus	GO:0005730	CC	69	524	0.131679389312977	0.0494578946721113
		microtubule cytoskeleton	GO:0015630	CC	146	771	0.189364461738003	0.0430756604634816
		ncRNA metabolic process	GO:0034660	BP	29	289	0.100346020761246	0.0494578946721113
		cellular protein localization	GO:0034613	BP	181	1110	0.163063063063063	0.0336779283882408
		cellular macromolecule localization	GO:0070727	BP	182	1117	0.162936436884512	0.033489612543225
		positive regulation of cellular metabolic process	GO:0031325	BP	324	1833	0.176759410801964	0.0315090948894974
		catalytic activity, acting on RNA	GO:0140098	MF	20	220	0.0909090909090909	0.047989762739822
		symbiont process	GO:0044403	BP	58	476	0.121848739495798	0.0381420490251193
		macromolecule catabolic process	GO:0009057	BP	110	759	0.144927536231884	0.0341170200295855
		negative regulation of cell cycle	GO:0045786	BP	41	347	0.118155619596542	0.037610533554409
		negative regulation of cell cycle process	GO:0010948	BP	18	189	0.0952380952380952	0.0441617171222101
		proteasomal protein catabolic process	GO:0010498	BP	32	278	0.115107913669065	0.0384360038213465
		ubiquitin ligase complex	GO:0000151	CC	20	191	0.104712041884817	0.0401857742086813
		positive regulation of macromolecule biosynthetic process	GO:0010557	BP	166	1016	0.163385826771654	0.027207904534834
		positive regulation of nucleobase-containing compound metabolic process	GO:0045935	BP	174	1033	0.168441432720232	0.0258461722544676
		nucleocytoplasmic transport	GO:0006913	BP	16	206	0.0776699029126214	0.0400598010843249
		nuclear transport	GO:0051169	BP	16	207	0.0772946859903382	0.0397043051244877
		interspecies interaction between organisms	GO:0044419	BP	58	487	0.119096509240246	0.0276970201984814
		protein localization to organelle	GO:0033365	BP	69	523	0.131931166347992	0.0239694598419776
		cellular protein catabolic process	GO:0044257	BP	59	453	0.130242825607064	0.0217930377023235
		pyridine nucleotide metabolic process	GO:0019362	BP	6	121	0.0495867768595041	0.0400127052529685
		nicotinamide nucleotide metabolic process	GO:0046496	BP	6	121	0.0495867768595041	0.0400127052529685
		proteasome-mediated ubiquitin-dependent protein catabolic process	GO:0043161	BP	27	249	0.108433734939759	0.0217930377023235
		negative regulation of macromolecule metabolic process	GO:0010605	BP	242	1485	0.162962962962963	0.012560340007078
		coenzyme metabolic process	GO:0006732	BP	21	249	0.0843373493975904	0.0201955753940092
		chromosomal region	GO:0098687	CC	23	217	0.105990783410138	0.0191828074064993
		cytoplasmic part	GO:0044444	CC	1062	5607	0.189406099518459	0.0106830889791863
		proteolysis involved in cellular protein catabolic process	GO:0051603	BP	53	423	0.125295508274232	0.0128697967258799
		mitotic cell cycle	GO:0000278	BP	88	595	0.147899159663866	0.0114076679768879
		positive regulation of nitrogen compound metabolic process	GO:0051173	BP	306	1761	0.173764906303237	0.00870622175205294
		transcription coregulator activity	GO:0003712	MF	44	335	0.13134328358209	0.0115981626992734
		covalent chromatin modification	GO:0016569	BP	35	284	0.123239436619718	0.0114372113236126
		regulation of cell cycle process	GO:0010564	BP	58	436	0.13302752293578	0.00835694301433741
		protein-containing complex	GO:0032991	CC	570	3132	0.181992337164751	0.00566207340474512
		viral process	GO:0016032	BP	51	453	0.112582781456954	0.00783030257418625
		cytoplasm	GO:0005737	CC	1291	6609	0.195339688303828	0.00429322841800252
		transcription regulator activity	GO:0140110	MF	177	1168	0.151541095890411	0.00452561871719384
		nuclear speck	GO:0016607	CC	22	253	0.0869565217391304	0.00698227415204009
		ribonucleoprotein complex subunit organization	GO:0071826	BP	6	146	0.0410958904109589	0.00868416531277515
		microtubule organizing center	GO:0005815	CC	77	485	0.158762886597938	0.00365405833964566
		cellular response to DNA damage stimulus	GO:0006974	BP	69	505	0.136633663366337	0.00361313574100234
		ubiquitin-dependent protein catabolic process	GO:0006511	BP	44	374	0.117647058823529	0.00342006399568912
		cellular macromolecule catabolic process	GO:0044265	BP	83	630	0.131746031746032	0.00295828546137391
		binding	GO:0005488	MF	1664	8433	0.197320052175975	0.00230779450496591
		modification-dependent protein catabolic process	GO:0019941	BP	44	376	0.117021276595745	0.00319747571034364
		ribonucleoprotein complex assembly	GO:0022618	BP	5	135	0.037037037037037	0.00698227415204009
		modification-dependent macromolecule catabolic process	GO:0043632	BP	45	383	0.117493472584856	0.00258174675675895
		transferase activity	GO:0016740	MF	252	1457	0.172958133150309	0.00175904384000809
		regulation of transcription by RNA polymerase II	GO:0006357	BP	234	1506	0.155378486055777	0.00118367175137151
		organic cyclic compound binding	GO:0097159	MF	607	3530	0.171954674220963	0.00103489805028462
		cell cycle process	GO:0022402	BP	120	812	0.147783251231527	0.00111959274706545
		RNA binding	GO:0003723	MF	104	885	0.117514124293785	0.00102899257748208
		ribonucleoprotein complex biogenesis	GO:0022613	BP	14	241	0.0580912863070539	0.00172624546518378
		centrosome	GO:0005813	CC	46	344	0.133720930232558	0.00114743063676823
		intracellular non-membrane-bounded organelle	GO:0043232	CC	453	2455	0.184521384928717	0.000734528683326691
		protein ubiquitination	GO:0016567	BP	61	504	0.121031746031746	0.000963952615788434
		chromatin organization	GO:0006325	BP	56	432	0.12962962962963	0.000945904984636232
		non-membrane-bounded organelle	GO:0043228	CC	453	2460	0.184146341463415	0.000520867164020137
		heterocyclic compound binding	GO:1901363	MF	595	3480	0.170977011494253	0.000513796346341944
		protein metabolic process	GO:0019538	BP	584	3299	0.177023340406184	0.000503790354877535
		organelle organization	GO:0006996	BP	410	2273	0.180378354597448	0.000497134843130789
		DNA metabolic process	GO:0006259	BP	79	611	0.129296235679214	0.000587781159707606
		RNA processing	GO:0006396	BP	51	511	0.0998043052837573	0.000630055957769684
		histone modification	GO:0016570	BP	29	272	0.106617647058824	0.000734528683326691
		protein binding	GO:0005515	MF	1282	6658	0.192550315410033	0.000398453595122859
		transcription by RNA polymerase II	GO:0006366	BP	243	1587	0.153119092627599	0.000437827948386425
		DNA repair	GO:0006281	BP	37	339	0.109144542772861	0.00055583003543676
		regulation of cell cycle	GO:0051726	BP	89	678	0.131268436578171	0.000445651583233076
		cellular response to stress	GO:0033554	BP	180	1179	0.152671755725191	0.000353082665697127
		chromosomal part	GO:0044427	CC	67	548	0.122262773722628	0.000215115396612708
		peptidyl-lysine modification	GO:0018205	BP	19	236	0.0805084745762712	0.000250641040969473
		DNA binding	GO:0003677	MF	201	1400	0.143571428571429	0.000101960776319731
		protein modification by small protein conjugation	GO:0032446	BP	64	560	0.114285714285714	4.94542799924428e-05
		regulation of gene expression	GO:0010468	BP	408	2508	0.162679425837321	3.49779060256491e-05
		organonitrogen compound metabolic process	GO:1901564	BP	670	3892	0.172147995889003	3.11817481081068e-05
		regulation of transcription, DNA-templated	GO:0006355	BP	300	1931	0.155359917141378	3.11817481081068e-05
		catalytic complex	GO:1902494	CC	105	830	0.126506024096386	2.62263964229479e-05
		regulation of nucleic acid-templated transcription	GO:1903506	BP	305	1971	0.154743784880771	1.23047598192218e-05
		regulation of RNA metabolic process	GO:0051252	BP	332	2120	0.156603773584906	1.04844353058111e-05
		cell cycle	GO:0007049	BP	154	1078	0.142857142857143	1.14519038726318e-05
		regulation of RNA biosynthetic process	GO:2001141	BP	305	1975	0.154430379746835	9.19000822698404e-06
		chromosome organization	GO:0051276	BP	94	702	0.133903133903134	7.91261646626052e-06
		transcription, DNA-templated	GO:0006351	BP	309	2025	0.152592592592593	5.63090677970041e-06
		transferase complex	GO:1990234	CC	52	503	0.10337972166998	5.71252335932999e-06
		protein modification by small protein conjugation or removal	GO:0070647	BP	79	678	0.116519174041298	4.50830283157442e-06
		cytosol	GO:0005829	CC	525	3014	0.174187126741871	3.00748477570014e-06
		nucleic acid-templated transcription	GO:0097659	BP	313	2055	0.152311435523114	3.00748477570014e-06
		regulation of cellular macromolecule biosynthetic process	GO:2000112	BP	340	2187	0.15546410608139	2.81539826254074e-06
		chromosome	GO:0005694	CC	74	629	0.117647058823529	3.00748477570014e-06
		RNA biosynthetic process	GO:0032774	BP	314	2065	0.152058111380145	2.32669739990085e-06
		macromolecule modification	GO:0043412	BP	430	2530	0.1699604743083	1.97681307660999e-06
		cellular protein metabolic process	GO:0044267	BP	494	2946	0.167684996605567	1.76938186624294e-06
		cellular protein modification process	GO:0006464	BP	408	2412	0.169154228855721	1.31442738266337e-06
		protein modification process	GO:0036211	BP	408	2412	0.169154228855721	1.31442738266337e-06
		nuclear body	GO:0016604	CC	47	472	0.0995762711864407	1.62560643592204e-06
		organic cyclic compound biosynthetic process	GO:1901362	BP	383	2502	0.153077537969624	8.12390921065331e-07
		nucleic acid binding	GO:0003676	MF	318	2242	0.141837644959857	6.00455084730924e-07
		regulation of macromolecule metabolic process	GO:0060255	BP	581	3477	0.167098073051481	5.46308462239784e-07
		regulation of cellular biosynthetic process	GO:0031326	BP	361	2363	0.152771900126957	4.5407707311582e-07
		regulation of macromolecule biosynthetic process	GO:0010556	BP	348	2259	0.154050464807437	4.53932413846954e-07
		regulation of biosynthetic process	GO:0009889	BP	367	2410	0.152282157676349	3.68457038564682e-07
		regulation of metabolic process	GO:0019222	BP	633	3790	0.167018469656992	3.52955021069842e-07
		regulation of nucleobase-containing compound metabolic process	GO:0019219	BP	357	2306	0.154813529921943	1.91575708323333e-07
		nucleus	GO:0005634	CC	652	4136	0.157640232108317	0
		nucleoplasm	GO:0005654	CC	270	2058	0.131195335276968	0
		nucleobase-containing compound metabolic process	GO:0006139	BP	474	3278	0.144600366076876	0
		cellular aromatic compound metabolic process	GO:0006725	BP	500	3395	0.147275405007364	0
		nitrogen compound metabolic process	GO:0006807	BP	946	5697	0.166052308232403	0
		membrane-enclosed lumen	GO:0031974	CC	428	2980	0.143624161073826	0
		nuclear lumen	GO:0031981	CC	326	2385	0.136687631027254	0
		cellular nitrogen compound metabolic process	GO:0034641	BP	533	3637	0.146549353863074	0
		intracellular organelle	GO:0043229	CC	1291	7228	0.178610957387936	0
		intracellular membrane-bounded organelle	GO:0043231	CC	1025	6186	0.165696734561914	0
		organelle lumen	GO:0043233	CC	428	2980	0.143624161073826	0
		nuclear part	GO:0044428	CC	365	2611	0.139793182688625	0
		heterocycle metabolic process	GO:0046483	BP	489	3363	0.145405887600357	0
		intracellular organelle lumen	GO:0070013	CC	428	2980	0.143624161073826	0
		nucleic acid metabolic process	GO:0090304	BP	418	2900	0.144137931034483	0
		regulation of chromosome separation	GO:1905818	BP	0	41	0	0.043274471026467
		cellular macromolecule metabolic process	GO:0044260	BP	770	4657	0.165342495168563	0
		intracellular part	GO:0044424	CC	1532	8198	0.186874847523786	0
		intracellular	GO:0005622	CC	1536	8204	0.187225743539737	0
		cellular metabolic process	GO:0044237	BP	1025	6061	0.169114007589507	0
		organic cyclic compound metabolic process	GO:1901360	BP	526	3516	0.149601820250284	0
		intracellular organelle part	GO:0044446	CC	914	5331	0.171450009379103	0
		primary metabolic process	GO:0044238	BP	1025	6005	0.170691090757702	0
		macromolecule metabolic process	GO:0043170	BP	909	5285	0.171996215704825	0
		macromolecule biosynthetic process	GO:0009059	BP	418	2777	0.150522146200936	0
		membrane-bounded organelle	GO:0043227	CC	1263	7057	0.178971234235511	0
		organelle part	GO:0044422	CC	982	5523	0.177801919246786	0
		organelle	GO:0043226	CC	1442	7709	0.187054092619017	0
		cellular macromolecule biosynthetic process	GO:0034645	BP	406	2701	0.150314698259904	0
		cellular nitrogen compound biosynthetic process	GO:0044271	BP	398	2708	0.146971935007386	0
		organic substance metabolic process	GO:0071704	BP	1077	6208	0.173485824742268	0
		RNA metabolic process	GO:0016070	BP	377	2568	0.146806853582555	0
		metabolic process	GO:0008152	BP	1135	6478	0.175208397653597	0
		nucleoplasm part	GO:0044451	CC	69	675	0.102222222222222	0
		organic substance biosynthetic process	GO:1901576	BP	538	3456	0.155671296296296	0
		regulation of cellular metabolic process	GO:0031323	BP	570	3506	0.162578436965203	0
		cellular biosynthetic process	GO:0044249	BP	530	3402	0.155790711346267	0
		biosynthetic process	GO:0009058	BP	547	3495	0.156509298998569	0
		heterocycle biosynthetic process	GO:0018130	BP	359	2407	0.149148317407561	0
		regulation of nitrogen compound metabolic process	GO:0051171	BP	540	3323	0.16250376166115	0
		nucleobase-containing compound biosynthetic process	GO:0034654	BP	355	2377	0.149347917543122	0
		gene expression	GO:0010467	BP	467	3007	0.155304289990023	0
		aromatic compound biosynthetic process	GO:0019438	BP	363	2420	0.15	0
		regulation of primary metabolic process	GO:0080090	BP	558	3432	0.162587412587413	0
† representation - differentially methylated genes in the category than we would expect given the size of the category and the gene length distribution.by chance; nDMInCat - number if genes with DMCs; nInCat - number of genes in category; p,adjust - adjusted p-value; CC- cellular component; MF - molecular function; BP - biological process
