# Supplementary material for: DNA Methylation Signature in Mononuclear Cells and Proinflammatory Cytokines May Define Molecular Subtypes in Sporadic Meniere Disease
Source: Preprints.org preprint supplement (doi:10.20944/preprints202110.0030.v1), 2021-10-01
Supplement: Supplementary file 6 [file Table_S15.xls]

## Sheet: Folha1
DMC	term	category	ontology	nDMInCat	nInCat	ratio	padjust
All	intracellular organelle part	GO:0044446	CC	251	5331	0.0470830988557494	0.0282466424444357
	nuclear part	GO:0044428	CC	105	2611	0.0402144772117962	0.0282466424444357
	nucleus	GO:0005634	CC	183	4136	0.0442456479690522	0.0282466424444357
	cellular nitrogen compound metabolic process	GO:0034641	BP	144	3637	0.0395930712125378	0.0282466424444357
	organic cyclic compound metabolic process	GO:1901360	BP	137	3516	0.0389647326507395	0.0282466424444357
	nucleobase-containing compound metabolic process	GO:0006139	BP	126	3278	0.038438071995119	0.0205894226794812
	heterocycle metabolic process	GO:0046483	BP	130	3363	0.0386559619387452	0.0205894226794812
	cellular aromatic compound metabolic process	GO:0006725	BP	130	3395	0.0382916053019146	0.0205894226794812
	intracellular membrane-bounded organelle	GO:0043231	CC	283	6186	0.0457484642741675	0.0205894226794812
Hypomethylated	cellular nitrogen compound metabolic process	GO:0034641	BP	131	3637	0.0360186967280726	0.0484243428591986
	organic cyclic compound metabolic process	GO:1901360	BP	124	3516	0.0352673492605233	0.0337980569797132
	nucleus	GO:0005634	CC	165	4136	0.0398936170212766	0.0337980569797132
	nucleobase-containing compound metabolic process	GO:0006139	BP	114	3278	0.0347773032336791	0.0299307893556329
	heterocycle metabolic process	GO:0046483	BP	117	3363	0.0347903657448706	0.0290269549234435
	intracellular membrane-bounded organelle	GO:0043231	CC	259	6186	0.0418687358551568	0.0290269549234435
	cellular aromatic compound metabolic process	GO:0006725	BP	117	3395	0.0344624447717231	0.0290269549234435
hypermethylated	homophilic cell adhesion via plasma membrane adhesion molecules	GO:0007156	BP	13	120	0.108333333333333	2.31921742201806e-07
	calcium ion binding	GO:0005509	MF	18	462	0.038961038961039	1.2924946656529e-05
	cell-cell adhesion via plasma-membrane adhesion molecules	GO:0098742	BP	13	179	0.0726256983240224	4.44057138345026e-05
	cell-cell adhesion	GO:0098609	BP	14	508	0.0275590551181102	0.0315550587066915
† nDMInCat - number if genes with DMCs; nInCat - number of genes in category; p,adjust - adjusted p-value; CC- cellular component; MF - molecular function; BP - biological process
