# Supplementary material for: DNA Methylation Signature in Mononuclear Cells and Proinflammatory Cytokines May Define Molecular Subtypes in Sporadic Meniere Disease
Source: Preprints.org preprint supplement (doi:10.20944/preprints202110.0030.v1), 2021-10-01
Supplement: Supplementary file 7 [file Table_S16.xls]

## Sheet: Folha1
Comparison	Phenotype	Term	Binom p-value	Binom FDR Q-Val	Binom Fold Enrichment	Hyper FDR Q-Val	Hyper Fold Enrichment	Hyper Observed Gene Hits	Hyper Total Genes	Hyper Gene Set Coverage	Genes
MDvControl	Single KO	abnormal miniature excitatory postsynaptic currents	0.000006082185	0.011138913609	2.481968	0.000106975329822222	3.899324	20	81	0.01682086	CACNA1A,CACNG2,CADPS,FBXL20,GRIA1,GRIN2A,GRIN2B,GRIN2C,KALRN,LRRTM4,LZTS1,NBEA,NRN1,NRXN1,NRXN3,RBFOX3,SHANK2,SNAP91,TMEM108,TNIK
		organ of Corti degeneration	0.00002081626	0.019061449282	3.000016	0.0123752654723913	3.715826	12	51	0.01009251	ADGRV1,CLIC5,ENSG00000260234,IDUA,ILDR1,LRTOMT,MAP3K1,MYO15A,PCDH15,SLC12A7,SLC26A5,TUB
		cochlear degeneration	0.00003743846	0.0228549318813333	2.78738	0.012615826850851	3.479651	13	59	0.01093356	ADGRV1,CLIC5,ENSG00000260234,IDUA,ILDR1,LAMA2,LRTOMT,MAP3K1,MYO15A,PCDH15,SLC12A7,SLC26A5,TUB
		abnormal posterior primitive streak morphology	0.0001032321	0.0378118535879999	8.337574	0.029360668656962	15.79226	3	3	0.002523129	BMP4,FGFR1,FOXF1
		abnormal excitatory postsynaptic currents	0.0001508791	0.0445677393129032	2.028226	0.000488018855688888	3.433101	20	92	0.01682086	CACNA1A,CACNG2,CADPS,DLG2,DSCAML1,EPS8,GRIK4,GRIN2A,GRIN2C,GRM1,IGSF11,KALRN,LZTS1,NBEA,NRG1,NRXN1,PLCB1,SNAP91,SYN3,TMEM108
	MGI phenotype	abnormal NMDA-mediated synaptic currents	0.000006563763	0.00896516257757142	4.107552	0.0279174541446428	4.356486	8	29	0.006728343	EPS8,FABP7,GRIK4,GRIN2A,GRIN2B,GRIN2C,NRXN1,NRXN3
		abnormal glutamate-mediated receptor currents	0.00001210955	0.011577940755	2.767359	0.00199581829961538	3.701312	15	64	0.01261564	CACNG2,DHCR7,EPS8,FABP7,GRIA1,GRIA4,GRIK4,GRIN2A,GRIN2B,GRIN2C,HLA-G,KALRN,LZTS1,NRXN1,NRXN3
		organ of Corti degeneration	0.00002394237	0.0190760832975	2.969826	0.0125092730518309	3.575607	12	53	0.01009251	ADGRV1,CLIC5,ENSG00000260234,IDUA,ILDR1,LRTOMT,MAP3K1,MYO15A,PCDH15,SLC12A7,SLC26A5,TUB
		cochlear degeneration	0.0000437681	0.0298904860071428	2.756501	0.0140092175092105	3.311281	13	62	0.01093356	ADGRV1,CLIC5,ENSG00000260234,IDUA,ILDR1,LAMA2,LRTOMT,MAP3K1,MYO15A,PCDH15,SLC12A7,SLC26A5,TUB
		abnormal sarcolemma morphology	0.00009451758	0.03929054706	4.172137	0.0170271735178571	5.527292	7	20	0.0058873	A1CF,COL12A1,DYSF,LAMA2,PIK3R4,PTCD2,SGCA
		abnormal posterior primitive streak morphology	0.0001032321	0.0365556336333333	8.337574	0.0239784862841584	15.79226	3	3	0.002523129	BMP4,FGFR1,FOXF1
		impaired swimming	0.0001420567	0.0438130357645161	2.308191	0.00199070840253658	3.355856	17	80	0.01429773	ABR,BLOC1S5-TXNDC5,CACNA1A,CACNG2,CLIC5,DOCK3,DSCAM,FOXI1,GRIN2B,GRM8,HGS,LSAMP,MYO15A,NDUFS4,NF2,NOX3,PCDH15
		decreased excitatory postsynaptic current amplitude	0.0001536373	0.0419693207228571	3.097124	0.0242037680757575	4.512075	8	28	0.006728343	CACNA1A,CADPS,IGSF11,NLGN1,NRXN1,NRXN3,SNAP91,TMEM108
MDLvControl	Single KO	abnormal miniature excitatory postsynaptic currents	0.000006082185	0.011138913609	2.481968	0.000106975329822222	3.899324	20	81	0.01682086	CACNA1A,CACNG2,CADPS,FBXL20,GRIA1,GRIN2A,GRIN2B,GRIN2C,KALRN,LRRTM4,LZTS1,NBEA,NRN1,NRXN1,NRXN3,RBFOX3,SHANK2,SNAP91,TMEM108,TNIK
		organ of Corti degeneration	0.00002081626	0.019061449282	3.000016	0.0123752654723913	3.715826	12	51	0.01009251	ADGRV1,CLIC5,ENSG00000260234,IDUA,ILDR1,LRTOMT,MAP3K1,MYO15A,PCDH15,SLC12A7,SLC26A5,TUB
		cochlear degeneration	0.00003743846	0.0228549318813333	2.78738	0.012615826850851	3.479651	13	59	0.01093356	ADGRV1,CLIC5,ENSG00000260234,IDUA,ILDR1,LAMA2,LRTOMT,MAP3K1,MYO15A,PCDH15,SLC12A7,SLC26A5,TUB
		abnormal posterior primitive streak morphology	0.0001032321	0.0378118535879999	8.337574	0.029360668656962	15.79226	3	3	0.002523129	BMP4,FGFR1,FOXF1
		abnormal excitatory postsynaptic currents	0.0001508791	0.0445677393129032	2.028226	0.000488018855688888	3.433101	20	92	0.01682086	CACNA1A,CACNG2,CADPS,DLG2,DSCAML1,EPS8,GRIK4,GRIN2A,GRIN2C,GRM1,IGSF11,KALRN,LZTS1,NBEA,NRG1,NRXN1,PLCB1,SNAP91,SYN3,TMEM108
	MGI phenotype	abnormal NMDA-mediated synaptic currents	0.000006563763	0.00896516257757142	4.107552	0.0279174541446428	4.356486	8	29	0.006728343	EPS8,FABP7,GRIK4,GRIN2A,GRIN2B,GRIN2C,NRXN1,NRXN3
		abnormal glutamate-mediated receptor currents	0.00001210955	0.011577940755	2.767359	0.00199581829961538	3.701312	15	64	0.01261564	CACNG2,DHCR7,EPS8,FABP7,GRIA1,GRIA4,GRIK4,GRIN2A,GRIN2B,GRIN2C,HLA-G,KALRN,LZTS1,NRXN1,NRXN3
		organ of Corti degeneration	0.00002394237	0.0190760832975	2.969826	0.0125092730518309	3.575607	12	53	0.01009251	ADGRV1,CLIC5,ENSG00000260234,IDUA,ILDR1,LRTOMT,MAP3K1,MYO15A,PCDH15,SLC12A7,SLC26A5,TUB
		cochlear degeneration	0.0000437681	0.0298904860071428	2.756501	0.0140092175092105	3.311281	13	62	0.01093356	ADGRV1,CLIC5,ENSG00000260234,IDUA,ILDR1,LAMA2,LRTOMT,MAP3K1,MYO15A,PCDH15,SLC12A7,SLC26A5,TUB
		abnormal sarcolemma morphology	0.00009451758	0.03929054706	4.172137	0.0170271735178571	5.527292	7	20	0.0058873	A1CF,COL12A1,DYSF,LAMA2,PIK3R4,PTCD2,SGCA
		abnormal posterior primitive streak morphology	0.0001032321	0.0365556336333333	8.337574	0.0239784862841584	15.79226	3	3	0.002523129	BMP4,FGFR1,FOXF1
		impaired swimming	0.0001420567	0.0438130357645161	2.308191	0.00199070840253658	3.355856	17	80	0.01429773	ABR,BLOC1S5-TXNDC5,CACNA1A,CACNG2,CLIC5,DOCK3,DSCAM,FOXI1,GRIN2B,GRM8,HGS,LSAMP,MYO15A,NDUFS4,NF2,NOX3,PCDH15
		decreased excitatory postsynaptic current amplitude	0.0001536373	0.0419693207228571	3.097124	0.0242037680757575	4.512075	8	28	0.006728343	CACNA1A,CADPS,IGSF11,NLGN1,NRXN1,NRXN3,SNAP91,TMEM108
MDHvControl	Single KO	abnormal eye electrophysiology	0.0000000000008685943	3.97685900255E-09	2.006197	0.000916480366675324	1.903622	47	190	0.0192623	ADGRV1,ALMS1,AQP4,ASIC2,ATP8A2,BMP4,CCND1,CRHR1,CRX,CTNNA1,DSCAM,ENSG00000214732,EPAS1,ERC2,FOS,FOXG1,GJA10,GLRA1,GRN,HDAC2,IRX6,LAMA1,LARGE1,LCA5,MERTK,MITF,NDUFS4,NR2E1,OTX2,PLCB4,PRKCQ,PROM1,PRPH2,RANBP2,RCVRN,RDH12,RELN,RGS9,RP1,RP1L1,RPGRIP1,SDK2,SLC7A14,SSTR1,TENM2,TSHR,VSX1
		abnormal miniature excitatory postsynaptic currents	0.0000000002539008	0.0000003874949376	2.213946	0.00470476690685483	2.280146	24	81	0.009836066	CACNG2,CADPS,DACT1,FBXL20,GRIA1,GRIN2A,GRIN2B,GRIN2C,KALRN,LRFN2,LRRTM4,LZTS1,NBEA,NRN1,NRXN1,NRXN3,PLPPR4,RBFOX3,RNF112,SHANK2,SNAP91,SYT1,TMEM108,TNIK
		abnormal organ of Corti supporting cell morphology	0.000000002186492	2.22463413822222E-06	2.628392	0.000122072597815555	3.633982	17	36	0.006967213	ADGRV1,EDNRB,ENSG00000260234,FGF20,FGFR1,FGFR3,GATA3,KCNQ1,LAMA2,NR2F1,PCDH15,POU1F1,SLC12A2,SLC26A5,SPRY2,SRRM4,TUB
		abnormal tectorial membrane morphology	0.000000003974033	3.03251834841666E-06	3.232	0.00792372566405228	3.031557	13	33	0.005327869	COL9A1,GRXCR1,HPN,IGF1,KCNQ1,KIT,MYO15A,OTOG,POU1F1,SLC12A2,TECTA,TPO,TSHR
		organ of Corti degeneration	0.00001302727	0.0013711576021839	2.127117	0.0467648881915584	2.26338	15	51	0.006147541	ADGRV1,CLIC5,EDNRB,ENSG00000260234,GATA3,GRXCR1,KCNQ1,KIT,LRTOMT,MAP3K1,MYO15A,PCDH15,SLC26A5,TUB,USH1C
		abnormal pillar cell morphology	0.00001617865	0.00154320727135416	2.606412	0.0259880932212121	3.621408	8	17	0.003278689	ADGRV1,FGF20,FGFR3,GATA3,PCDH15,POU1F1,SPRY2,SRRM4
		decreased kidney weight	0.00001779673	0.00164610764252525	2.120125	0.013238212465909	2.468365	17	53	0.006967213	BOC,CXCL14,EFEMP1,FGF10,GHR,GLIS2,HSD17B2,LGR4,POU3F3,PREP,RHOBTB3,RIC8B,SLC14A2,SLC3A1,SLC4A4,TKT,ZNF521
		vitreal fibroplasia	0.00004450008	0.00323402565523809	4.200792	0.0140833620556756	7.695492	4	4	0.001639344	COL4A1,LAMA1,LARGE1,RPGRIP1
		abnormal mucous gland morphology	0.00005753437	0.00371015652176056	2.18075	0.0255407365298245	2.91898	11	29	0.004508197	CABLES1,CDH5,CFTR,EDAR,FANCL,FGF10,FOXL1,FSHR,IGF2R,LHCGR,PDX1
		absent diencephalon	0.0000598989	0.00370604207635135	4.069806	0.0411083846795774	6.156393	4	5	0.001639344	DKK1,OTX2,SHH,SSBP3
		enlarged pericardium	0.00007454604	0.00423986390236024	2.120927	0.0290376281481632	2.716056	12	34	0.004918033	AXIN1,BMP10,CLUAP1,GATA2,JAG1,MECOM,NRG1,RSPO3,SLC8A1,SOS1,TCF7L1,XBP1
		decreased type I pneumocyte number	0.00009410047	0.00489589774880681	4.578982	0.0108336521832335	6.41291	5	6	0.00204918	ABCA3,FSTL1,NR3C1,SNX5,WNT7B
		abnormal blood gas level	0.0003567814	0.0124222330030418	3.867228	0.0252237454736607	5.49678	5	7	0.00204918	COL1A1,EDN1,EDNRB,MUC5B,SOD2
		abnormal type I pneumocyte morphology	0.0003710865	0.0126321155408921	3.140811	0.00763938388289473	4.897131	7	11	0.002868852	ABCA3,CITED2,DHCR7,FSTL1,NR3C1,SNX5,WNT7B
		abnormal lateral plate mesoderm morphology	0.0004121785	0.0135280233853046	2.95358	0.025485486879646	4.617295	6	10	0.002459016	BMP4,CLUAP1,FGFR1,FOXF1,ISL1,ZNF345
		delayed fertility	0.0007600142	0.0196040845898591	2.228328	0.00622750112410071	4.074084	9	17	0.003688525	ALK,COL1A1,FHL5,FSHR,GHR,GNRH1,KIT,LPIN1,OTX1
		abnormal miscarriage rate	0.001052496	0.024337641090909	2.799064	0.0140729653097826	5.130328	6	9	0.002459016	ANTXR2,ENSG00000259753,MECOM,SLC13A1,STAT5B,TYR
		small caput epididymis	0.001130496	0.0253724310588235	3.318155	0.0140833620556756	7.695492	4	4	0.001639344	FSHR,LGR4,MYC,ROS1
		decreased aggression towards males	0.001868903	0.0353585635764462	2.212756	0.0330050508347656	3.847746	7	14	0.002868852	CREBBP,GAD2,GRIA1,GRN,KIRREL3,LSAMP,NOS1
		delayed female fertility	0.001953488	0.0364319544114053	2.606561	0.0399927753687943	4.197541	6	11	0.002459016	COL1A1,FSHR,GHR,GNRH1,KIT,LPIN1
		disorganized retinal ganglion layer	0.002432019	0.0417823601932457	2.804234	0.0411083846795774	6.156393	4	5	0.001639344	CCND1,DSCAM,LARGE1,NR2E1
	MGI phenotype	absent tunnel of Corti	3.259661E-15	3.1165618821E-11	5.437157	0.0102411709886363	5.130328	6	9	0.002459016	FGFR3,FOXG1,JAG1,PCDH15,SLC12A2,TUB
		abnormal tunnel of Corti morphology	1.330628E-14	6.361067154E-11	5.027046	0.00569209870704225	4.897131	7	11	0.002868852	FGFR3,FOXG1,JAG1,PCDH15,POU1F1,SLC12A2,TUB
		abnormal hair cell mechanoelectric transduction	0.000000000009203551	2.199878777775E-08	5.478741	0.015870080911821	4.143726	7	13	0.002868852	ADGRV1,MYO15A,PCDH15,PLS1,TECTA,TMC2,USH1C
		decreased synaptic glutamate release	0.00000000001056294	0.000000020198453868	5.686107	0.0178983172035714	4.617295	6	10	0.002459016	ADGRL1,EMX1,NOS1,NRXN1,SLC17A6,SSTR1
		abnormal organ of Corti supporting cell morphology	0.00000000001751237	0.000000027905961595	2.711031	0.000054601980837931	3.345866	20	46	0.008196721	ADGRV1,DLL1,EDNRB,ENSG00000260234,FGF20,FGFR1,FGFR3,FOXG1,GATA3,KCNQ1,LAMA2,NR2F1,PCDH15,POU1F1,SLC12A2,SLC26A5,SPRY2,SRRM4,THRA,TUB
		abnormal glutamate-mediated receptor currents	0.0000000007594362	5.18640679157142E-07	2.452694	0.00209164342211538	2.525083	21	64	0.008606557	CACNG2,DHCR7,EMX1,FABP7,GJA10,GRIA1,GRIA4,GRIK2,GRIK4,GRIN2A,GRIN2B,GRIN2C,HLA-B,HLA-G,KALRN,LZTS1,NRXN1,NRXN3,RGS9,SLC17A6,TYR
		abnormal NMDA-mediated synaptic currents	0.000000001141478	0.0000007275780772	3.397799	0.0490369786553784	2.653618	10	29	0.004098361	EMX1,FABP7,GRIK4,GRIN2A,GRIN2B,GRIN2C,NRXN1,NRXN3,RGS9,TYR
		abnormal tectorial membrane morphology	0.000000003760675	1.89241124605263E-06	3.175325	0.00440777458627659	2.992691	14	36	0.005737705	COL9A1,GRXCR1,HPN,IGF1,KCNQ1,KIT,MYO15A,OTOG,POU1F1,SLC12A2,TECTA,THRA,TPO,TSHR
		abnormal synaptic glutamate release	0.00000001184971	5.39500368142857E-06	3.643944	0.0261180558015665	3.420219	8	18	0.003278689	ADGRL1,EMX1,KCNJ6,NOS1,NRXN1,SLC17A6,SSTR1,ST3GAL5
		enlarged otoliths	0.00000004206398	0.0000129733455735483	4.359026	0.0434132348198757	3.847746	6	12	0.002459016	ABR,ATG5,BCR,KIT,PCDH15,TECTA
		abnormal lateral ganglionic eminence morphology	0.0000000752317	0.0000205511509628571	2.91293	0.000760902945378151	4.23252	11	20	0.004508197	BMP4,BOC,CDON,EBF1,EMX1,FOXG1,ID4,INSC,NR2E1,OTX2,SHH
		abnormal vestibular saccule morphology	0.0000001384432	0.000034833037768421	2.142172	0.00573562577488151	2.518525	18	55	0.007377049	ABR,BCR,BMP4,DLL1,FGF10,FOXG1,FOXI1,GATA3,GRXCR1,JAG1,KCNQ1,KIT,MITF,OTOG,OTX1,PCDH15,SHH,SLC12A2
		abnormal pillar cell morphology	0.0000001415974	0.0000347131472153846	2.833078	0.00556970079374999	3.66452	10	21	0.004098361	ADGRV1,FGF20,FGFR3,FOXG1,GATA3,PCDH15,POU1F1,SPRY2,SRRM4,THRA
		abnormal embryonic/fetal subventricular zone morphology	0.0000004225561	0.0000776934398480769	2.039037	0.00190084227701298	2.608641	20	59	0.008196721	APAF1,BMP4,BOC,CDON,EBF1,EMX1,FEZF1,FOXG1,ID4,INSC,NR2E1,OTX1,OTX2,POU3F2,POU3F3,ROBO1,SHH,SLIT2,SOX11,SRRM4
		decreased kidney weight	0.0000004372561	0.0000788793504169811	2.184257	0.00181583018543046	2.489718	22	68	0.009016393	AGTR1,BOC,CXCL14,EFEMP1,FGF10,GHR,GLIS2,GNRH1,HSD17B2,IGF1,ITGB1,LGR4,POU3F3,PREP,RHOBTB3,RIC8B,SIX2,SLC14A2,SLC3A1,SLC4A4,TKT,ZNF521
		decreased organ of Corti supporting cell number	0.000001880477	0.000249711674958333	3.315787	0.00569209870704225	4.897131	7	11	0.002868852	DLL1,FGF20,FGFR1,FOXG1,GATA3,KCNQ1,SLC12A2
		abnormal organ of Corti supporting cell number	0.000003096366	0.000365485868222222	3.212069	0.015870080911821	4.143726	7	13	0.002868852	DLL1,FGF20,FGFR1,FOXG1,GATA3,KCNQ1,SLC12A2
		abnormal vestibular hair cell morphology	0.000004617008	0.00048509025810989	2.038784	0.0176876916099397	2.456008	15	47	0.006147541	APAF1,BMP4,CACNG2,CLIC5,FGF10,FOXG1,GRXCR1,JAG1,KCNQ1,KIT,LAMA2,OTOG,PCDH15,SRRM4,USH1C
		abnormal otolith morphology	0.000005147536	0.000518058859957894	2.614466	0.0438761566871035	2.565164	11	33	0.004508197	ABR,ATG5,BCR,BLOC1S5-TXNDC5,FOXI1,KCNQ1,KIT,NOX3,OTOG,PCDH15,TECTA
		coiled cecum	0.00000844171	0.000768677993428571	5.482062	0.0442131098037974	7.695492	3	3	0.001229508	CFTR,SLC12A2,SLC4A4
		abnormal otolithic membrane morphology	0.00001162378	0.00100121586108108	2.500682	0.0317823268557692	2.565164	12	36	0.004918033	ABR,ATG5,BCR,BLOC1S5-TXNDC5,DOCK2,FOXI1,KCNQ1,KIT,NOX3,OTOG,PCDH15,TECTA
		organ of Corti degeneration	0.00001628175	0.00123547469642857	2.105711	0.0462104526592741	2.177969	15	53	0.006147541	ADGRV1,CLIC5,EDNRB,ENSG00000260234,GATA3,GRXCR1,KCNQ1,KIT,LRTOMT,MAP3K1,MYO15A,PCDH15,SLC26A5,TUB,USH1C
		absent mandibular coronoid process	0.00001814024	0.00135499089562499	3.152234	0.0434132348198757	3.847746	6	12	0.002459016	BMP2,BMP4,MSX1,OTX2,PAX9,RSPO2
		abnormal hair cell physiology	0.00002009311	0.00144443777977443	2.157233	0.0401130624129032	2.292274	14	47	0.005737705	ADGRV1,ALG10,CHRNA9,ENSG00000260234,HPN,MYO15A,PCDH15,PLS1,POU1F1,SLC26A5,TECTA,THRA,TMC2,USH1C
		abnormal spinal cord lateral column morphology	0.00003221717	0.0021243335335862	3.261967	0.029731375309756	6.156393	4	5	0.001639344	ROBO1,ROBO2,SLIT2,SLIT3
		vitreal fibroplasia	0.00004450008	0.0028364350992	4.200792	0.010226959593609	7.695492	4	4	0.001639344	COL4A1,LAMA1,LARGE1,RPGRIP1
		buphthalmos	0.00004741182	0.0028872892421656	2.931061	0.0434132348198757	3.847746	6	12	0.002459016	ANGPT1,ANGPT2,BMP4,COL4A1,COL4A2,PRKCQ
		absent diencephalon	0.000153735	0.00668118334090909	3.10693	0.032964712056338	4.809682	5	8	0.00204918	DKK1,OTX1,OTX2,SHH,SSBP3
		decreased chemically-elicited antinociception	0.0001670186	0.00706577360442477	2.447136	0.0260882439350649	3.148156	9	22	0.003688525	CAMK4,CHRM2,CNR1,GABRA2,GNAZ,GRIN2A,OPRK1,OPRM1,SLC17A6
		abnormal medial ganglionic eminence morphology	0.000188987	0.00746654837603305	2.62797	0.0292923829402985	4.197541	6	11	0.002459016	BOC,CDON,FOXG1,ID4,OTX2,SHH
		abnormal chemically-elicited antinociception	0.0002314656	0.00857768450232558	2.243585	0.0236949007784916	2.82168	11	30	0.004508197	CAMK4,CHRM2,CNR1,GABRA2,GNAZ,GRIN2A,OPRK1,OPRM1,PENK,PPP1R14C,SLC17A6
		abnormal blood gas level	0.0003567814	0.0111113581934853	3.867228	0.0176101433292537	5.49678	5	7	0.00204918	COL1A1,EDN1,EDNRB,MUC5B,SOD2
		small caput epididymis	0.0004784175	0.013031765576923	3.449251	0.00220623481106249	7.695492	5	5	0.00204918	FSHR,LGR4,MYC,RANBP9,ROS1
		absent cartilage	0.0006127175	0.0156636150200534	2.615373	0.00790393868535564	6.41291	5	6	0.00204918	COL9A1,SHH,SOX5,SOX6,SOX9
		abnormal posterior primitive streak morphology	0.001196246	0.025026932179431	3.941089	0.0442131098037974	7.695492	3	3	0.001229508	BMP4,FGFR1,FOXF1
		delayed fertility	0.001804175	0.0334945964563106	2.07331	0.0141861635301639	3.462971	9	20	0.003688525	ALK,COL1A1,FHL5,FSHR,GHR,GNRH1,KIT,LPIN1,OTX1
		abnormal pyloric sphincter morphology	0.001906978	0.0347950699580152	3.087255	0.032964712056338	4.809682	5	8	0.00204918	GATA3,NOS1,NOS2,PDX1,PRKG1
		delayed female fertility	0.001953488	0.0352401863547169	2.606561	0.0292923829402985	4.197541	6	11	0.002459016	COL1A1,FSHR,GHR,GNRH1,KIT,LPIN1
		absent ciliary process	0.001961163	0.0352456380507518	3.317669	0.0442131098037974	7.695492	3	3	0.001229508	NECTIN1,NECTIN3,OTX1
		abnormal hindlimb bud morphology	0.002167413	0.0378841603162705	2.12963	0.0336227114347826	3.59123	7	15	0.002868852	BMP4, CCNF, ISL1, MECOM, PITX1, TBX4, T
		disorganized retinal ganglion layer	0.002568231	0.042190475242268	2.6414	0.032964712056338	4.809682	5	8	0.00204918	CCND1,DSCAM,LARGE1,MPP5, NR2E1
		decreased diameter of femur	0.002764791	0.0442042922257525	2.404283	0.0182212454049418	3.621408	8	17	0.003278689	COL12A1, COL1A1, EBF2, IGF1, IL6ST, PTPN2, RFLNA, RFLNB
		abnormal fornicate gyrus morphology	0.002840567	0.044964670673841	2.243093	0.0336227114347826	3.59123	7	15	0.002868852	COX10, DCLK1, GM2A, NPAS3, NR2E1, NR2F1, RELN
† binom p-value - uncorrected p-value from binomial test over genomic regions; binom FDR q-value - false discovery rate q-value; hyper FDR - false discovery rate q-value for the hypergeometric test; hyper observ - actual number of genes in the test set with the annotation; hyper total - number of genes in the genome with the annotation; hyper coverage - the fraction of all genes in the test set w…
