# Supplementary material for: DNA Methylation Signature in Mononuclear Cells and Proinflammatory Cytokines May Define Molecular Subtypes in Sporadic Meniere Disease
Source: Preprints.org preprint supplement (doi:10.20944/preprints202110.0030.v1), 2021-10-01
Supplement: Supplementary file 8 [file Table_S17.xlsx]

## Sheet: Folha1
Table S17 - Transcription factor enrichment analysis with GO biological process and KEGG annotations (adjusted p-value < 1.00E-50).
description	annotation_id	relative_enrichment	p-value	padj	genes
regulation of transcription by RNA polymerase II	GO:0006357	9.215005431197064	2.502234553875942e-178	1.6800002794723073e-174	PAX5,ZNF124,EZH2,KLF8,IRF3,KLF4,ZNF282,NFKB1,UBP1,ZNF596,ATP2B4,MEIS1,ETV6,SMARCA4,ZNF529,HNF4A,ZNF20,CITED2,ZNF302,ELF3,ESR2,SP110,ZNF425,RELA,ZNF417,ZNF140,PEG3,RUNX2,TBX21,RB1,HIVEP1,ZNF227,SREBF1,ZNF670,ZNF669,ARID3A,ZNF184,SPI1,PRDM1,ZNF254,NR1H4,ZNF613,ZNF599,MAF,ZNF12,FLI1,JUN,SP3,HOXB9,ZFP36,IRF9,RBL2,NFE2L2,ZNF155,RXRG,FOXO1,ZNF311,TAL1,ETV7,NR5A1,APP,NRF1,ZNF331,BRCA1,TP53,E2F3,NR3C1,ZN…
regulation of transcription, DNA-templated	GO:0006355	9.499315241089917	8.341558924283286e-171	2.800261330881899e-167	PAX5,ZNF124,NCOA1,EZH2,IRF3,ZNF282,NFKB1,ZNF596,HCFC1,TAF5L,MEIS1,ETV6,SMARCA4,ZNF529,HNF4A,ZNF20,CITED2,ZNF302,ELF3,ESR2,ZNF425,RELA,ZNF417,ZNF140,RUNX2,SBNO2,TBX21,RB1,PML,ZNF227,SOX4,SREBF1,ZNF670,ZNF669,ARID3A,ZNF184,SPI1,ZNF254,NR1H4,ZNF613,ZNF599,MAF,ZNF12,FLI1,JUN,SP3,HOXB9,IRF9,NFE2L2,ZNF155,RXRG,FOXO1,ZNF311,ETV7,NR5A1,INSR,ZNF331,TP53,E2F3,NR3C1,ZNF460,NAB2,ELF4,CUX1,ZFHX3,NFATC1,ZNF157…
positive regulation of transcription by RNA polymerase II	GO:0045944	9.302822018886431	6.016906649003055e-165	1.3465837080468837e-161	LPIN3,PAX5,NOD2,NCOA1,HRAS,IRF3,FGF2,KLF4,NFKB1,UBP1,HCFC1,MEIS1,ETV6,SMARCA4,HNF4A,CITED2,PLSCR1,NOS1,ELF3,PARP1,ESR2,RELA,PEG3,RUNX2,GDNF,SBNO2,ACTR2,RB1,ACTR3,HIVEP1,ZNF227,SOX4,SREBF1,ARID3A,SPI1,NR1H4,MAF,ZNF462,FLI1,RRP1B,JUN,SP3,HOXB9,DPF2,DAB2,NFE2L2,RXRG,FOXO1,TAL1,NR5A1,APP,NRF1,MMP12,TLR3,UHRF1,BRCA1,TP53,E2F3,NR3C1,TGFB1,RIPK1,ELF4,ZFHX3,HAMP,CX3CL1,SIRT1,CTNNB1,NFATC1,NFKBIA,TCF4,PAX…
signal transduction	GO:0007165	6.701612771805555	5.223542707162214e-136	8.767716433971775e-133	SOS1,NDRG1,HRAS,TNFSF10,TFF1,PTN,GAST,OXTR,FGF2,NFKB1,ULK1,CCK,VEGFB,STAM,DIRAS2,IFNGR1,CXCL2,KIT,IL23A,OPRM1,CCRL2,TP53BP2,NGF,MADCAM1,IGFBP4,ESR2,KSR1,PLAUR,CCL2,IFNA1,TNFSF13B,TNFRSF10A,CXCL9,ENPEP,GDNF,CSF2,MAP2K6,DRG2,CD2AP,ANGPT2,TNFRSF10D,FCGR1A,CCL3,TNFRSF8,NTF3,CD4,ITGAL,PNOC,SPP1,PRL,IL3,TNFRSF11B,IL5RA,BCAR1,TLR3,SIGIRR,AGTR1,GFER,CHRNA6,PTHLH,CCND3,PLAU,SRC,NR3C1,CCR4,LRRC59,CRH,RIPK1…
apoptotic process	GO:0006915	10.637187306425494	4.698781840283817e-129	6.30952425513311e-126	CD14,HRAS,TNFSF10,AIM2,IRF3,BIRC2,NFKB1,CCK,IL2RA,PLSCR1,BAK1,TP53BP2,PARP1,DAPK2,PEG3,TNFRSF10A,TMBIM6,ALOX15B,PML,MAP2K6,CTSH,FHIT,GADD45A,BNIP3,TNFRSF10D,SERPINB9,RRP1B,PERP,DPF2,MAP3K5,CASP6,DAB2,FOXO1,TNFRSF11B,APP,STEAP3,TP53,IER3,NR3C1,GZMB,DDIT4,TGFB1,RIPK1,GML,GADD45G,BIRC3,SIRT1,PYCARD,APAF1,NFKBIA,BID,ZMAT3,CIDEB,PRF1,BBC3,IGFBP3,CASP3,GJA1,LTA,EPHA2,BCL2L11,AKT2,NEK6,GULP1,CASR,TNFRSF…
negative regulation of apoptotic process	GO:0043066	12.431491691699303	2.8388355124379456e-126	3.176656938418061e-123	SPRY2,BIRC2,EIF2AK2,NFKB1,VEGFB,HSPA5,CITED2,PLAUR,RPS3A,RELA,PAGE4,ADAM10,GDNF,TMBIM6,MPZ,MMP9,CTSH,BNIP3,AURKA,TNFRSF10D,SERPINB9,NR1H4,DAB2,GSTP1,FOXO1,KDR,CCND2,PROC,TP53,NQO1,IER3,SRC,PLK2,PTGS2,RIPK1,CX3CL1,BIRC3,SIRT1,CTNNB1,IFIT3,TFRC,PAX2,PDGFRB,BTG2,TIMP1,VEGFA,PLK1,IL2RB,AKR1B1,EDNRB,COPS5,CAT,MYC,HCK,CASP3,MIF,NAA35,ALOX12,PTGFR,AKT2,PTMA,SMAD3,SOD1,BCL3,PRDX3,NOL3,BCL2A1,MPO,TRIAP1,P…
negative regulation of transcription by RNA polymerase II	GO:0000122	9.39688110041638	1.31674241214847e-125	1.2629440793092612e-122	MCPH1,PAX5,ZNF124,EZH2,KLF8,IRF3,UBE2I,KLF4,ZNF282,NFKB1,ZNF596,HCFC1,ETV6,SMARCA4,ZNF529,CAV1,TXNIP,ZNF20,CITED2,PARP1,ESR2,ZNF425,RELA,ZNF140,PEG3,TBX21,RB1,HIVEP1,SREBF1,ZNF669,SPI1,PRDM1,GADD45A,ZNF254,NR1H4,ZNF599,MAF,JUN,SP3,ZFP36,DPF2,DAB2,CCNE1,TAL1,ETV7,APP,MMP12,UHRF1,TP53,CCND3,NR3C1,CUX1,ZFHX3,HAMP,SIRT1,CTNNB1,DNMT1,CTCF,SMARCA2,ZNF589,BTG2,RARA,MXI1,VEGFA,PLK1,ZNF350,CREM,EDNRB,MYC,…
positive regulation of transcription, DNA-templated	GO:0045893	9.585784811791003	1.2674841535354673e-113	1.063736075854641e-110	NCOA1,IRF3,BIRC2,XPC,FGF2,KLF4,NFKB1,HCFC1,TAF5L,CCNA2,SMARCA4,HNF4A,CITED2,NOS1,ESR2,RELA,PAGE4,RUNX2,TBX21,PML,SOX4,SREBF1,SPI1,NR1H4,PDGFB,FLI1,JUN,SP3,MAP3K5,CD4,NFE2L2,NEK4,FOXO1,SPP1,TAL1,NR5A1,BRCA1,TP53,E2F3,SRC,TGFB1,ELF4,ZFHX3,BLM,CTNNB1,NFATC1,CTCF,NFKBIA,TCF4,PAX2,SMARCA2,REL,RARA,MYC,EGF,CD80,HMGA1,CIITA,ESR1,SMAD3,BRD7,BCL3,EGR2,PPARGC1A,CDKN1C,DDIT3,MYBL1,TP73,HDAC4,AGT,FOXM1,EGFR,…
positive regulation of gene expression	GO:0010628	11.732485500699743	2.5827368869641834e-113	1.9267217176752807e-110	HRAS,SPRY2,FGF2,KLF4,HCFC1,CELF1,IFNGR1,CAV1,KIT,CITED2,PLSCR1,NGF,RUNX2,TBX21,CSF2,CTSH,SPI1,PRDM1,SERPINB9,MAF,PDGFB,CCL3,VIM,FBLN1,NFE2L2,NR5A1,APP,MMP12,TLR3,BRCA1,TP53,SRC,GJC2,TGFB1,CRH,CTNNB1,ALDH1A2,DNMT1,CDH3,CTCF,TFRC,ITGAX,RARA,VEGFA,CRP,MYC,CLDN5,EGF,RBMS3,GJA1,ALOX12,PTGFR,CD34,PRKAB1,SMAD3,HEY1,TNC,ACTC1,CASR,HFE,PPARGC1A,EZR,F3,CXCL8,ATF3,SLC6A4,AMH,TYROBP,CD28,BMP4,IGF1,FN1,AR,ACT…
positive regulation of cell population proliferation	GO:0008284	11.242837215858003	8.256249947730025e-112	5.5432462149059385e-109	NOD2,HRAS,EZH2,PTN,FGF2,MEIS1,CCK,KIT,PDGFRA,RELA,RUNX2,ADAM10,GDNF,CSF2,SOX4,CTSH,PDGFB,JUN,NTF3,KDR,CCND2,PRL,IL3,INSR,E2F3,ITGAV,PTHLH,IL12RB2,PTGS2,FBXO5,TGFB1,CRH,CX3CL1,SIRT1,CTNNB1,ALDH1A2,PAX2,ITGAX,CDK4,PDGFRB,TIMP1,RARA,OSM,VEGFA,EDNRB,S100B,MYC,CLDN5,HCK,EGF,IL21,PTGFR,AKT2,CXCL5,FGFBP1,HTR1A,TNC,CCND1,CASR,MCTS1,PRDX3,PBX1,IGF2,EDN1,RAD51B,ATF3,HDAC4,IL2,AGT,FOXM1,NOTCH2,CDC7,EGFR,CSF…
negative regulation of cell population proliferation	GO:0008285	11.748764890571612	4.383253859628245e-101	2.67537876486764e-98	NDRG1,HRAS,TFF1,SPRY2,FGF2,EIF2AK2,KLF4,CELF1,HNF4A,CAV1,OPRM1,BAK1,NGF,NME1,RB1,ALOX15B,PML,SOX4,RARRES1,TNFRSF8,IFITM1,IFI35,BTG3,APP,TP53,PTHLH,PTGS2,TGFB1,GML,RBM38,CTNNB1,IFIT3,ALDH1A2,CTCF,SMARCA2,BTG2,SSTR2,RARA,OSM,IGFBP3,CDK6,KLF10,GJA1,HMGA1,FGFBP1,SMAD3,BRD7,CDKN2C,CDKN2B,ADRA1A,CXCL8,TP73,TIMP2,HDAC4,IL10,BMP4,RARB,F2R,BCL2,AR,B4GALT1,CAV2,PDPN,ZNF268,CDKN1B,KAT2B,TP53INP1,S100A11,CYP…
immune response	GO:0006955	13.32794715357165	6.40448103767811e-101	3.5833071405809026e-98	TNFSF10,CTSG,MICA,AIM2,CXCL2,IL2RA,IL23A,CCRL2,MADCAM1,CCL2,BPI,TNFSF13B,CXCL9,B2M,FCGR3A,CSF2,CD8A,MS4A2,SERPINB9,FCGR1A,CCL3,CD4,ITGAD,IFITM3,IL3,C1R,TLR3,CCR4,HAMP,CX3CL1,HLA-DRA,HLA-DMA,CCL5,CD24,OSM,CTSK,CCR7,CD80,CTSV,IL21,LTA,IL1R1,KIR3DL1,CXCL3,CXCL5,MBP,CIITA,SMAD3,PPBP,MICB,CXCL8,SPN,IL2,CD274,IL10,CD28,IL1RL1,CBLB,CXCR4,HLA-DRB1,CCR5,CCL16,CEBPB,LTB,CTSS,BMP6,CXCL12,CTSL,IRF8,HLA-E,CXC…
response to drug	GO:0042493	14.986425339366518	2.6447263693499513e-99	1.365899449524275e-96	PTN,ITGA2,CCNB1,OXTR,XPC,DUSP6,VEGFB,TXNIP,BAK1,LPL,NME1,RELA,B2M,APOA1,MAP2K6,SREBF1,RAD51,JUN,NFE2L2,TNFRSF11B,S100A10,TP53,NQO1,SRC,PTGS2,CRH,ABCC1,SMPD1,CTNNB1,CDH3,CDK4,RHOA,CAT,MYC,CASP3,PTH,LTA,ACTC1,CCND1,SOD1,PPARGC1A,ABCB1,EDN1,ADRA1A,TP73,TIMP2,SLC6A4,HDAC4,MAOB,AMH,IL10,APEX1,BLMH,BCL2,CDKN1B,TYMS,MGMT,CA9,CYBB,NTRK1,TH,ABCA2,SLC8A1,ICAM1,TGFB2,STAR,CDH1,POR,HMOX1,ABCA1,FOXO3,FOSL1,HS…
inflammatory response	GO:0006954	11.803673938002296	2.2104660182680359e-91	1.0600763461893995e-88	CD14,NOS2,AIM2,PTX3,NFKB1,CXCL2,IL2RA,KIT,IL23A,CCRL2,ELF3,IGFBP4,CCL2,RELA,CXCL9,MS4A2,NR1H4,MEFV,IL17C,CCL3,NFE2L2,ITGAL,SPP1,TLR3,AGTR1,PTGS2,TGFB1,CCR4,CRH,RIPK1,CX3CL1,PYCARD,C3AR1,ALOX5,CCL5,REL,IRAK2,CRP,CCR7,HCK,NFATC4,MIF,EPHA2,IL1R1,SERPINA3,PTGFR,CXCL3,CXCL5,CIITA,IL17D,BDKRB1,BDKRB2,PPBP,CXCL8,CRHBP,HDAC4,IFI16,CD44,CSF1R,HMGB1,NINJ1,POLB,F2R,TNFAIP6,CXCR4,AGER,ITGB2,CCR5,CCL16,FPR1,C…
positive regulation of apoptotic process	GO:0043065	13.291531997414351	3.303985552997745e-89	1.4788639335217908e-86	NCOA1,TNFSF10,PTN,DUSP6,CCK,TXNIP,BAK1,DAPK2,TNFRSF10A,ADAM10,MAP2K6,SOX4,MMP9,GADD45A,BNIP3,AIFM2,RRP1B,JUN,TNFRSF8,ALDH1A3,MAP3K5,FOXO1,APP,TLR3,TP53,SRC,PTGS2,RIPK1,GADD45G,BIN1,SMPD1,SIRT1,CTNNB1,ALDH1A2,PYCARD,APAF1,CDK4,BID,PDGFRB,ZMAT3,BBC3,IGFBP3,S100B,NFATC4,CASP3,LTA,ALOX12,TOP2A,BCL2L11,TNFRSF10B,SOD1,TP73,HPGD,NOTCH2,BMP4,HMGB1,RARB,B4GALT1,ATM,CSRNP3,ZNF268,HTT,CTSD,TP53INP1,KCNMA1,F…
response to hypoxia	GO:0001666	19.009981810255407	2.270251442152629e-83	9.52654261413297e-81	NOS2,ITGA2,BIRC2,VEGFB,CAV1,CITED2,NOS1,CAPN2,PML,MMP14,NPPA,BNIP3,ANGPT2,VCAM1,PLAU,DDIT4,APAF1,CD24,RHOA,SLC2A1,VEGFA,CAT,CASP3,LTA,SMAD3,EGLN3,PPARGC1A,NOL3,EDN1,LONP1,SLC6A4,MB,CXCR4,AGER,ATM,CDKN1B,MMP2,CA9,CHRNA7,CXCL12,KCNMA1,TH,SLC8A1,ICAM1,TGFB2,REG1A,CASP1,HMOX1,EP300,CFLAR,HSPD1,PPARA,ANG,SMAD4,TLR2,SOD2,F7,ETS1,LEP,MYB,ADAM17,PGF,VEGFC,PENK,XRCC1,TGFBR2,ADA,CREBBP,NF1,CYP1A1,EGR1,PLAT…
regulation of cell cycle	GO:0051726	13.84325596711834	6.145873583251952e-78	2.427258543409036e-75	HRAS,PTPRC,IL12B,CCNB1,BIRC2,FGF2,CELF1,BAK1,ADAM10,RB1,PML,MAP2K6,GADD45A,CCNE2,JUN,RBL2,CCNE1,CCND2,BRCA1,TP53,CCND3,TGFB1,GADD45G,ZFHX3,BIN1,BIRC3,RBM38,CDK4,PLK1,MSH2,CCNG2,COPS5,CCNG1,MYC,MIF,CDK6,JUNB,AKT2,SMAD3,CDKN2C,CCND1,CDKN2B,CDKN1C,CXCL8,TP73,FOXM1,NOTCH2,TCF7L2,HBP1,BCL2,DTL,ATM,ZNF268,CDKN1B,KAT2B,TP53INP1,XIAP,TSC2,TGFB2,CABLES1,HMGA2,STK11,CDKN2D,CSNK2A1,IRF1,MDM4,FOXA1,STAT3,IFN…
response to lipopolysaccharide	GO:0032496	16.958161513942446	1.1574880768960042e-70	4.317430526822095e-68	CD14,NOD2,CTSG,NOS2,IRF3,OPRM1,NOS1,RELA,PCK2,JUN,VCAM1,ACP5,LBP,IL12RB2,PTGS2,SPARC,NFKBIA,EDNRB,CCR7,CASP3,FOXP1,GJA1,LTA,PTGFR,NFKB2,PRDX3,BDKRB1,MPO,EDN1,HPGD,MAOB,IL10,IFNAR1,F2R,IL18BP,CEBPB,CYP27B1,CD6,FASLG,TH,PTAFR,SELE,ICAM1,PTGES,CASP1,ATP2A2,HSPD1,PCK1,NOS3,TLR2,CXCL10,ELANE,MYD88,SOD2,CHUK,IL1B,ADAM17,PENK,CASP8,IL12A,TLR4,JAK2,LITAF,CYP1A1,THBD,PTGIR,SRR,REN,TBXA2R,MAPK1,FOS,FOXP3,E…
positive regulation of cell migration	GO:0030335	12.978790068063423	9.8617180713998e-68	3.4848197437567506e-65	HRAS,SPRY2,CAV1,KIT,HSPA5,PDGFRA,ADAM10,MMP14,MMP9,CTSH,PDGFB,CCL3,NTF3,DAB2,PODXL,KDR,INSR,BCAR1,ITGAV,PLAU,TGFB1,CCL5,ITGAX,PDGFRB,RHOA,VEGFA,EGF,AKT2,SMAD3,MGAT5,EDN1,F3,CD274,EGFR,CSF1R,BMP4,IGF1,F2R,TNFAIP6,PECAM1,PDGFA,CXCR4,PDPN,ATM,ZNF268,SYNE2,CXCL12,PLP1,CDH13,CLDN4,ELP3,MMP7,PDGFC,CSF1,IRS2,IGF1R,STAT3,CXCL10,FLT1,CCL11,ITGB1,CD151,SOD2,F7,F10,ETS1,IL1B,ADAM17,RET,CDH5,VEGFC,SSH2,JAK2,…
cellular response to DNA damage stimulus	GO:0006974	8.356951255859322	4.529363033242618e-64	1.5205071702595469e-61	MCM9,MICA,IRF3,XPC,PARP1,VCP,GADD45A,RAD51,ERCC1,NEK4,FOXO1,MCMDC2,UHRF1,BRCA1,TP53,MLH1,BLM,SIRT1,MCM8,ZMAT3,BTG2,BBC3,MSH2,MYC,CASP3,MACROD1,DCLRE1C,FOXP1,TOP2A,POLD1,CCND1,EGLN3,MCTS1,BCL3,CCNK,RAD51B,DDIT3,ASCC2,TP73,WRN,FOXM1,POLD2,HMGB1,APEX1,POLB,BCL2,DTL,EYA2,ATM,TP63,USP7,MGMT,IRF7,RRM2B,PCNA,FMR1,XIAP,MNDA,ERCC4,INO80,PLK3,FANCC,DDB1,STK11,LIG1,MCM10,PSEN1,INTS7,REV3L,BAX,OGG1,FANCD2,CH…
immune system process	GO:0002376	7.916280086695313	2.414304171153526e-63	7.540469525101278e-61	CD14,NOD2,MICA,AIM2,IRF3,EIF2AK2,IL2RA,IL23A,PSMB9,OAS2,TNFSF13B,B2M,PML,POLR3A,CD8A,PRDM1,NR1H4,MEFV,ZC3HAV1,MCM3AP,FCGR1A,IFITM1,IFI35,MAP3K5,IRF9,CD4,IFITM3,C1R,IDO1,TLR3,GBP1,LBP,SRC,OAS1,IFIT3,PYCARD,HLA-DRA,OASL,HLA-DMA,CFB,IFIT1,BST2,SH2D1A,HCK,MIF,DCLRE1C,ISG15,ERAP2,MICB,TAP1,PARP14,ITGAM,IL2,CD274,IFI16,OAS3,TYROBP,CSF1R,HMGB1,HLA-DRB1,ATM,IRF4,ISG20,MX1,IRF7,JAK3,LTF,IRF8,HLA-E,CASP4,C…
negative regulation of transcription, DNA-templated	GO:0045892	7.817142020062038	2.470812176827943e-63	7.540469525101278e-61	EZH2,UBE2I,KLF4,ZNF282,NFKB1,SMARCA4,HNF4A,CITED2,ELF3,ZNF425,RELA,RUNX2,SBNO2,TBX21,CSF2,RB1,PML,SPI1,ZNF12,PDGFB,JUN,SP3,DPF2,FOXO1,BRCA1,TP53,SRC,NR3C1,TGFB1,NAB2,SIRT1,CTNNB1,DNMT1,CTCF,PAX2,SMARCA2,RARA,ZNF350,KLF10,FOXP1,COPS2,HMGA1,TAF7,CIITA,BRD7,HEY1,BCL3,CDKN1C,DDIT3,PARP14,ATF3,HDAC4,FOXM1,IFI16,TCF7L2,BMP4,APEX1,ZEB1,CDKN1B,TP63,CEBPB,PPARD,FOXD1,SOX6,AHR,TRIM22,GCLC,HMGA2,ID1,WNT4,IR…
cell cycle	GO:0007049	7.203968214129489	2.9791955851247915e-62	8.696660503707762e-60	CCNB1,UBE2I,HCFC1,CCNA2,TXNIP,HMCN1,TP53BP2,CENPW,RB1,GADD45A,CCNE2,AURKA,CD2AP,MAD1L1,RBL2,NEK4,CCNE1,CCND2,STEAP3,UHRF1,BRCA1,TP53,E2F3,CCND3,SRC,NR3C1,MLH1,FBXO5,RBM38,CDK4,CLASP2,MCM8,RHOA,PLK1,CCNG2,CCNG1,CDK6,CDC25A,MCM5,BRD7,NEK6,CDC45,CDKN2C,CCND1,MCM6,MCTS1,KIF23,ARL2,CCNK,CDKN2B,CDKN1C,KIF2A,DDIT3,DBF4,TP73,FOXM1,CDT1,CDC7,E2F6,HELLS,ATM,RACGAP1,CDKN1B,KAT2B,TP63,KIF2C,CDC25C,CDC6,MKI67…
regulation of cell population proliferation	GO:0042127	14.926319355385099	3.351180440035437e-62	9.374927280999136e-60	NDRG1,EZH2,NOS2,SPRY2,BIRC2,KLF4,TXNIP,KIT,KSR1,CXCL9,CSF2,PRDM1,JUN,TAL1,AGTR1,TP53,CCND3,PLAU,PTGS2,TGFB1,SIRT1,CTNNB1,DNMT1,NFKBIA,TFRC,CDK4,BID,CDK6,JUNB,TNC,STAT2,EGLN3,STAT5A,PBX1,AGT,FOXM1,SGK1,CDKN1B,NR5A2,GNL3,S100A11,PPARD,XIAP,CLU,TGFB2,MITF,TFAP2A,ESRRA,SMAD4,STAT3,CXCL10,MYD88,PF4,TNF,ASCL1,FES,IL4R,DBH,CHEK1,TFAP2C,STAT1,CHST11,TGFBR2,WNT7A,IER5,BCL6,CDCA7,HIF1A,PLA2G4A,FANCA
cellular response to lipopolysaccharide	GO:0071222	14.895682410895393	9.032170282117512e-58	2.425679650965479e-55	CD14,NOD2,CTSG,NOS2,IRF3,IL12B,NFKB1,CXCL2,CAPN2,CCL2,RELA,BPI,CXCL9,B2M,SBNO2,CSF2,CD68,ZFP36,VIM,GSTP1,LBP,SRC,SERPINE1,HAMP,PYCARD,CDK4,RARA,RHOA,EDNRB,CD80,CXCL3,CXCL5,PPARGC1A,PPBP,CXCL8,CD274,IL10,HMGB1,CCR5,CEBPB,PPARD,IRF8,IL1A,TNFAIP3,ICAM1,STAR,CASP1,CD40,ABCA1,CXCL10,MYD88,PF4,TNF,IL1B,CD86,IL24,MAPK8,IL6,CEBPE,TLR4,LITAF,RIPK2,TBXA2R,CXCL1,LY96
innate immune response	GO:0045087	7.876463405875171	3.59816557353251e-56	9.29157063872972e-54	CD14,NOD2,AIM2,IRF3,PTX3,EIF2AK2,PTK6,IL23A,OAS2,RELA,BPI,B2M,PML,CHGA,POLR3A,PRDM1,NR1H4,MEFV,ZC3HAV1,FCGR1A,IFITM1,IFI35,MAP3K5,APCS,IFITM3,C1R,APP,TLR3,LBP,SRC,OAS1,ELF4,IFIT3,PYCARD,F12,OASL,REL,NPY,CFB,CRP,IFIT1,BST2,SH2D1A,HCK,MIF,NCF2,ISG15,PARP14,ITGAM,IFI16,OAS3,CSF1R,HMGB1,ISG20,MX1,IRF7,JAK3,LTF,CYBB,HLA-E,CASP4,CD6,NCF1,CLU,TRIM22,CSF1,IRF1,ADAR,ANG,TLR2,LCK,GATA3,MYD88,C1QBP,CHUK,NMI…
response to virus	GO:0009615	18.58561677604549	1.4098914817070277e-55	3.5059301511781424e-53	EIF2AK2,IFNGR1,OAS2,TBX21,ZC3HAV1,IFITM1,IFITM3,TLR3,SRC,OAS1,SMPD1,IFIT3,OASL,ODC1,CCL5,IFIT1,BST2,CDK6,HMGA1,ISG15,BCL3,OAS3,HSPB1,IFNAR1,CXCR4,ACTA2,DUOX2,ISG20,MX1,IRF7,CXCL12,CLU,TRIM22,HMGA2,IFNB1,FOSL1,ADAR,HYAL1,CXCL10,IFNG,CCL11,GATA3,MYD88,CHUK,NMI,TNF,BATF3,IL12A,CCL22,CYP1A1,BCL2L1,FOXP3,HNRNPUL1,CCL4,STMN1
cell differentiation	GO:0030154	5.37017358538162	3.581024334891619e-54	8.586784780165119e-52	PAX5,TFF1,FGF2,KLF4,DUSP6,PTK6,ETV6,HNF4A,CAV1,CITED2,ELF3,NME1,RPS3A,RUNX2,SBNO2,RB1,SOX4,SPI1,MGP,ANGPT2,NR1H4,FLI1,DAB2,RBL2,RXRG,FOXO1,SPP1,KDR,TAL1,ETV7,NR5A1,SRC,ELF4,GADD45G,BIN1,RBM38,SIRT1,CTNNB1,APAF1,TCF4,PAX2,ASF1B,RARA,RHOA,VEGFA,ERG,CREM,HCK,NFATC4,GAS7,CDK6,NTNG2,EPHA2,SMAD3,NRP1,PBX1,RASGRP1,ELF5,KIF2A,MYBL1,NOTCH2,EGFR,AMH,BMP4,RARB,CAV2,EYA2,RACGAP1,ZEB1,ZNF268,TP63,GABPA,CEBPB,…
aging	GO:0007568	14.290317638838552	7.55711339868358e-54	1.7496020468538465e-51	PAX5,FGF2,BAK1,RELA,SREBF1,CD68,JUN,MME,VCAM1,NFE2L2,NQO1,PTGS2,HAMP,CX3CL1,APAF1,PAX2,PDGFRB,TIMP1,EDNRB,CAT,ALOX12,CIITA,NFKB2,SOD1,PPARGC1A,IGFBP1,BCL2A1,MPO,ADRA1A,WRN,LONP1,TIMP2,AGT,AMH,IL10,APEX1,POLB,TYMS,TP63,ATP2B1,NTRK1,MMP7,GCLC,FOXO3,PCK1,STAT3,SOD2,OGG1,PENK,TGFBR2,KRT16,ADA,CASP7,LITAF,PTEN,CYP1A1,SRR,AKT1,MAPK1,FOS,PPP3CA,EPO
negative regulation of gene expression	GO:0010629	10.238071943954296	1.5581156696008227e-53	3.487062868566641e-51	HRAS,EZH2,NOS2,CCNB1,FGF2,KLF4,NFKB1,CELF1,ATP2B4,VEGFB,CITED2,BAK1,NME1,ADAM10,RB1,TCEAL1,MSR1,SPI1,PRDM1,AURKA,PDGFB,CCL3,RBL2,KDR,APP,TP53,TGFB1,CRH,SIRT1,CTNNB1,DNMT1,CTCF,REL,RARA,VEGFA,CLDN5,RBMS3,PTH,MIF,FOXP1,CD34,ESR1,EDN1,PINK1,CXCL8,PARP14,AGT,NOTCH2,CD28,BMP4,IGF1,TP53INP1,TGFB2,WNT4,PSEN1,MYCN,IFNG,GATA3,TNF,ACE,CDK1,PIAS3,PGR,CDKN1A,AKT1,CCR1,VDR,TERT,LDLR,PPARG,HIF1A,PPP3CA,FOXP3,A…
protein phosphorylation	GO:0006468	6.860875971408089	3.7073664602735835e-53	8.029438198153819e-51	CTSG,CCNB1,EIF2AK2,PTK6,ULK1,KIT,PDGFRA,KSR1,CCL2,LMTK2,DAPK2,ADAM10,MAP2K6,PIK3CA,AURKA,PDGFB,CCL3,MAP3K5,NEK4,CCNE1,KDR,APP,INSR,SRC,PLK2,TGFB1,RIPK1,PDK4,CCL5,CDK4,PDGFRB,DMPK,IRAK2,RARA,PLK1,ERG,IGFBP3,HCK,CDK6,COPS2,PLK4,EPHA2,AKT2,CIITA,PRKAB1,NEK6,CCND1,CCNK,PINK1,CDC7,SGK1,EGFR,CSF1R,ATM,JAK3,NTRK1,CDK11A,PLK3,TGFB2,STK11,CSNK2A1,ROR1,IGF1R,LCK,FLT1,CCL11,FGFR1,EIF2AK3,CHUK,AVP,BTK,FES,PP…
Herpes simplex virus 1 infection	hsa05168	28.798319327731093	2.977787188946436e-200	9.82669772352324e-198	ZNF124,IRF3,IL12B,BIRC2,EIF2AK2,ZNF282,NFKB1,ZNF596,HCFC1,IFNGR1,ZNF529,ZNF20,BAK1,ZNF302,OAS2,ITGA5,ZNF425,CCL2,RELA,ZNF417,IFNA1,ZNF140,B2M,PML,PIK3CA,ZNF227,ZNF670,ITGB3,ZNF669,ZNF184,ZNF254,ZNF613,ZNF599,ZNF12,IRF9,ZNF155,ZNF311,ZNF331,TLR3,TP53,SRC,OAS1,ZNF460,BIRC3,ZNF157,HLA-DRA,APAF1,NFKBIA,HLA-DMA,CCL5,ZNF112,ZNF860,BID,ZNF589,ZNF350,ZNF251,ZNF680,BST2,CASP3,ZNF354A,ZNF230,LTA,AKT2,ZNF78…
Pathways in cancer	hsa05200	19.131750602338837	2.5423291165511918e-194	4.194843042309466e-192	SOS1,NCOA1,HRAS,NOS2,ITGA2,IL12B,BIRC2,FGF2,NFKB1,VEGFB,CCNA2,IFNGR1,IL2RA,KIT,IL23A,PDGFRA,BAK1,ESR2,RELA,IFNA1,DAPK2,RB1,PML,PIK3CA,MMP9,SPI1,GADD45A,CCNE2,HSP90AA1,PDGFB,RAD51,JUN,GSTP1,NFE2L2,RXRG,CCNE1,FOXO1,CCND2,IL3,IL5RA,AGTR1,TP53,E2F3,ITGAV,NQO1,CCND3,IL12RB2,PTGS2,MLH1,TGFB1,GADD45G,BIRC3,CTNNB1,APAF1,NFKBIA,CDK4,BID,PDGFRB,RARA,RHOA,BBC3,SLC2A1,VEGFA,MSH2,IL2RB,EDNRB,MYC,EGF,CASP3,CDK…
PI3K-Akt signaling pathway	hsa04151	18.887966522641445	2.4826702827976413e-118	2.7309373110774056e-116	SOS1,HRAS,ITGA2,FGF2,NFKB1,VEGFB,VWF,IL2RA,KIT,PDGFRA,NGF,PIK3R5,ITGA5,RELA,IFNA1,PIK3CA,ITGB3,CCNE2,ANGPT2,HSP90AA1,PDGFB,PCK2,NTF3,RBL2,CCNE1,SPP1,KDR,CCND2,PRL,IL3,INSR,BRCA1,TP53,ITGAV,CCND3,DDIT4,CDK4,PDGFRB,OSM,VEGFA,IL2RB,COL2A1,MYC,EGF,CDK6,EPHA2,BCL2L11,AKT2,TNC,CCND1,IGF2,IL2,SGK1,EGFR,CSF1R,IFNAR1,IGF1,FN1,F2R,BCL2,PDGFA,CDKN1B,JAK3,NTRK1,TSC2,FASLG,PDGFC,STK11,PPP2R2D,IFNB1,CSF1,YWHAQ…
Cytokine-cytokine receptor interaction	hsa04060	22.625473006834543	6.016878158940595e-113	4.963924481125991e-111	TNFSF10,IL12B,IFNGR1,CXCL2,IL2RA,IL23A,NGF,CCL2,IFNA1,TNFSF13B,TNFRSF10A,CXCL9,CSF2,TNFRSF10D,IL17C,CCL3,TNFRSF8,CD4,PRL,IL3,TNFRSF11B,IL5RA,IL12RB2,TGFB1,CCR4,CX3CL1,CCL5,OSM,IL2RB,CCR7,IL21,LTA,IL1R1,CXCL3,CXCL5,IL17D,TNFRSF10B,PPBP,CXCL8,IL2,AMH,IL10,IL1RL1,CSF1R,BMP4,IFNAR1,CXCR4,CCR5,CCL16,LTB,BMP6,CXCL12,CXCR1,IL1A,FASLG,IL5,TGFB2,EBI3,IL19,CD40,TNFSF14,IFNB1,CSF1,CXCL10,IFNG,CCL11,PF4,FAS,…
Human T-cell leukemia virus 1 infection	hsa05166	21.77061275438557	5.112260989948142e-104	3.3740922533657737e-102	HRAS,NFKB1,CCNA2,IL2RA,RELA,B2M,CSF2,RB1,PIK3CA,SPI1,CCNE2,MAD1L1,JUN,ZFP36,CD4,CCNE1,ITGAL,CCND2,TP53,E2F3,CCND3,TGFB1,NFATC1,HLA-DRA,NFKBIA,HLA-DMA,CDK4,SLC2A1,IL2RB,MYC,NFATC4,LTA,IL1R1,AKT2,SMAD3,NRP1,NFKB2,CDKN2C,CCND1,EGR2,STAT5A,CDKN2B,IL2,POLB,HLA-DRB1,ATM,ITGB2,KAT2B,JAK3,HLA-E,XIAP,MMP7,ICAM1,TGFB2,CCNA1,CD40,EP300,FOSL1,SMAD4,CD3D,LCK,CHUK,ETS1,TNF,BAX,SLC25A5,HLA-DMB,E2F1,HLA-DQA2,CHE…
Epstein-Barr virus infection	hsa05169	23.766315492065395	1.749108837216307e-103	9.620098604689689e-102	CD58,IRF3,EIF2AK2,NFKB1,CCNA2,BAK1,OAS2,RELA,IFNA1,B2M,RB1,MAP2K6,PIK3CA,GADD45A,CCNE2,JUN,IRF9,VIM,CCNE1,ITGAL,CCND2,TP53,E2F3,CCND3,OAS1,RIPK1,GADD45G,HLA-DRA,APAF1,NFKBIA,HLA-DMA,CDK4,BID,MYC,CASP3,CDK6,BCL2L11,AKT2,NFKB2,STAT2,CCND1,ISG15,TAP1,OAS3,CD44,IFNAR1,BCL2,HLA-DRB1,CDKN1B,USP7,IRF7,JAK3,HLA-E,TNFAIP3,ICAM1,CCNA1,CD40,IFNB1,CD3D,TRAF2,TLR2,STAT3,CXCL10,MYD88,CHUK,SKP2,FAS,TNF,FCER2,BT…
Lipid and atherosclerosis	hsa05417	21.560101321387233	2.716314052109704e-101	1.2805480531374318e-99	CD14,HRAS,TNFSF10,IRF3,IL12B,NCF4,NFKB1,CXCL2,HSPA5,CCL2,RELA,IFNA1,TNFRSF10A,APOA1,MAP2K6,PIK3CA,MMP9,HSP90AA1,JUN,CCL3,VCAM1,MAP3K5,CASP6,CYP2B6,NFE2L2,RXRG,TP53,LBP,SRC,NFATC1,PYCARD,APAF1,NFKBIA,CCL5,BID,RHOA,CASP3,CXCL3,AKT2,CYP2J2,NCF2,TNFRSF10B,MMP3,DDIT3,CXCL8,BCL2,AGER,IRF7,CYBB,NCF1,FASLG,SELE,ICAM1,CASP1,CD40,IFNB1,ABCA1,HSPD1,NOS3,TRAF2,TLR2,STAT3,MYD88,EIF2AK3,SOD2,CHUK,FAS,TNF,BAX,I…
Transcriptional misregulation in cancer	hsa05202	25.633668852156244	3.190851172733478e-97	1.3162261087525596e-95	CD14,PAX5,BIRC2,DUSP6,NFKB1,MEIS1,ETV6,CCNA2,BAK1,RELA,RUNX2,CSF2,PML,MMP9,SPI1,GADD45A,MAF,FLI1,FCGR1A,RXRG,FOXO1,CCND2,ETV7,IL3,TP53,PLAU,GZMB,GADD45G,BIRC3,REL,RARA,ERG,IL2RB,IGFBP3,MYC,CDKN2C,PBX1,BCL2A1,BMI1,MPO,MMP3,DDIT3,CXCL8,HPGD,ITGAM,CSF1R,IGF1,PDGFA,ATM,ZEB1,CDKN1B,CEBPB,HOXA10,NTRK1,TRAF1,HMGA2,CCNA1,MITF,CD40,MYCN,IGF1R,FLT1,ELANE,BAX,CD86,LYL1,TGFBR2,IL6,ETV4,CEBPE,CDKN1A,MET,PLAT,…
JAK-STAT signaling pathway	hsa04630	25.117855743145228	6.071078828417048e-95	2.003456013377626e-93	SOS1,HRAS,IL12B,STAM,IFNGR1,IL2RA,SOCS4,IL23A,PDGFRA,IFNA1,CSF2,PIK3CA,PDGFB,IRF9,CCND2,PRL,IL3,IL5RA,CISH,SOCS1,CCND3,IL12RB2,PDGFRB,OSM,IL2RB,MYC,EGF,AOX1,SOCS7,IL21,AKT2,STAT2,IL17D,CCND1,SOCS5,STAT5A,IL2,EGFR,IL10,IFNAR1,BCL2,PDGFA,JAK3,IL5,IL19,IFNB1,EP300,SOCS3,STAT3,IFNG,SOCS6,MCL1,LEP,IL12RB1,CSF2RA,IL4R,CSF3R,LIF,IFNLR1,STAT1,IL24,IL6,PIAS3,IL12A,CREBBP,CDKN1A,JAK1,JAK2,MPL,IL4,AKT1,IL6S…
MicroRNAs in cancer	hsa05206	24.04203581885243	5.963384415406721e-95	2.003456013377626e-93	SOS1,TIMP3,HRAS,EZH2,SPRY2,UBE2I,NFKB1,PDGFRA,BAK1,ITGA5,PIK3CA,SOX4,MMP9,ITGB3,CCNE2,PDGFB,VIM,CCNE1,CCND2,SOCS1,BRCA1,TP53,E2F3,GLS,PLAU,PTGS2,DDIT4,ABCC1,SIRT1,DNMT1,PDGFRB,RHOA,VEGFA,CCNG1,MYC,CASP3,CDK6,FOXP1,CDC25A,BCL2L11,TNC,CCND1,KIF23,SERPINB5,BMI1,EZR,ABCB1,HDAC4,NOTCH2,CD44,EGFR,BCL2,PDGFA,CYP24A1,ATM,ZEB1,CDKN1B,TP63,CDC25C,TGFB2,HMGA2,HMOX1,MDM4,EP300,IRS2,STAT3,MCL1,E2F1,FGFR3,CYP1…
Metabolic pathways	hsa01100	9.053652230122818	5.396818422091962e-91	1.6190455266275887e-89	LPIN3,EZH2,NOS2,UGT2B15,MPST,MGAT5B,NOS1,NME1,DHFR,HSD17B1,CYP2C19,DCT,ADH1A,ALOX15B,PIK3CA,TYR,FHIT,PDHA1,CKM,CYP3A5,SUCLG1,PCK2,ALDH1A3,TYRP1,ACP5,LAP3,CYP2B6,GSTP1,ALDOA,IDO1,GALNT6,GLS,NQO1,PTGS2,CYP7A1,SMPD1,SIRT1,ALDH1A2,DNMT1,GALT,B4GALNT1,RRM2,ODC1,ALOX5,CYP3A7,AKR1B1,TRIT1,UGDH,GGPS1,CAT,MIF,AOX1,ALOX12,CYP2J2,MGAT5,EARS2,TPI1,ISYNA1,LTC4S,CERS2,AHCYL1,CYP27A1,POMT2,PDE6A,AMPD3,MAOB,MAT2…
Kaposi sarcoma-associated herpesvirus infection	hsa05167	21.653754114992914	1.3214743797055352e-89	3.634054544190222e-88	HRAS,MICA,IRF3,FGF2,EIF2AK2,NFKB1,IFNGR1,CXCL2,BAK1,PIK3R5,RELA,IFNA1,CSF2,RB1,MAP2K6,PIK3CA,ANGPT2,PDGFB,JUN,ZFP36,IRF9,TLR3,TP53,E2F3,SRC,PTGS2,CCR4,MAP1LC3A,CTNNB1,NFATC1,NFKBIA,CDK4,BID,VEGFA,MYC,HCK,NFATC4,CASP3,CDK6,CXCL3,AKT2,STAT2,CCND1,MICB,CXCL8,TCF7L2,IFNAR1,MAP1LC3B,CCR5,IRF7,HLA-E,ICAM1,IFNB1,EP300,TRAF2,STAT3,CHUK,FAS,BAX,CD86,E2F1,SYK,STAT1,CASP8,HLA-G,MAPK8,IL6,HLA-F,CREBBP,CDKN1A…
p53 signaling pathway	hsa04115	34.67356173238527	1.3340948710116544e-86	3.386548518721892e-85	CCNB1,TNFRSF10A,GADD45A,CCNE2,AIFM2,PERP,CCNE1,CCND2,RCHY1,STEAP3,TP53,CCND3,SERPINE1,GADD45G,APAF1,RRM2,CDK4,BID,ZMAT3,BBC3,CCNG2,IGFBP3,CCNG1,CASP3,TP53I3,CDK6,CCND1,TNFRSF10B,SERPINB5,TP73,IGF1,BCL2,ATM,RRM2B,TSC2,SESN1,TP53AIP1,CD82,MDM4,SIVA1,FAS,BAX,PPM1D,CHEK1,CASP8,PIDD1,CDK1,CDKN1A,PTEN,SIAH1,BCL2L1,CDKN2A,DDB2,SFN,PMAIP1,THBS1,SESN2,CHEK2,EI24,MDM2
Measles	hsa05162	24.40600271939014	5.113131789585343e-83	1.2052382075451165e-81	IRF3,IL12B,EIF2AK2,NFKB1,IL2RA,BAK1,OAS2,RELA,IFNA1,PIK3CA,CCNE2,JUN,IRF9,CCNE1,CCND2,RCHY1,TP53,CCND3,OAS1,APAF1,NFKBIA,CDK4,BID,BBC3,IL2RB,CASP3,CDK6,AKT2,STAT2,CCND1,STAT5A,TP73,IL2,OAS3,CD28,IFNAR1,CBLB,BCL2,CDKN1B,MX1,IRF7,JAK3,IL1A,FASLG,TNFAIP3,IFNB1,CSNK2A1,ADAR,CD3D,TLR2,STAT3,MYD88,EIF2AK3,CHUK,FAS,BAX,IL1B,STAT1,CASP8,MAPK8,IL6,IL12A,HSPA1A,TLR4,JAK1,AKT1,BCL2L1,FOS,CSNK2B,CSNK2A2,EIF2…
Human papillomavirus infection	hsa05165	17.117882117882118	1.8356631463867267e-81	4.038458922050798e-80	SOS1,HRAS,IRF3,ITGA2,EIF2AK2,NFKB1,CCNA2,VWF,BAK1,ITGA5,RELA,IFNA1,RB1,PIK3CA,ITGB3,CCNE2,IRF9,RBL2,CCNE1,FOXO1,SPP1,CCND2,TLR3,TP53,ITGAV,CCND3,PTGS2,CTNNB1,OASL,CDK4,PDGFRB,VEGFA,COL2A1,EGF,CASP3,CDK6,AKT2,HEY1,TNC,STAT2,CCND1,ISG15,NOTCH2,EGFR,TCF7L2,IFNAR1,FN1,ATM,CDKN1B,MX1,HLA-E,TSC2,FASLG,CCNA1,WNT4,PPP2R2D,IFNB1,IRF1,EP300,PSEN1,ITGB1,CHUK,COL1A2,AXIN2,FAS,TNF,BAX,E2F1,STAT1,CASP8,HLA-G,H…
Influenza A	hsa05164	22.29209697204139	5.848634513164841e-79	1.1353231702025868e-77	TNFSF10,IRF3,IL12B,EIF2AK2,NFKB1,IFNGR1,BAK1,OAS2,CCL2,RELA,IFNA1,TNFRSF10A,PML,PIK3CA,IRF9,TLR3,CCND3,OAS1,PYCARD,HLA-DRA,APAF1,NFKBIA,HLA-DMA,CCL5,CDK4,BID,CASP3,CDK6,AKT2,CIITA,STAT2,TNFRSF10B,CXCL8,OAS3,IFNAR1,HLA-DRB1,MX1,IRF7,IL1A,FASLG,ICAM1,CASP1,IFNB1,EP300,SOCS3,ADAR,CXCL10,IFNG,MYD88,CHUK,FAS,TNF,BAX,SLC25A5,IL1B,HLA-DMB,IL18,HLA-DQA2,STAT1,CASP8,IL6,IL12A,CREBBP,TLR4,JAK1,JAK2,AKT1,MA…
Apoptosis	hsa04210	24.737017884076707	5.518367490924206e-79	1.1353231702025868e-77	HRAS,TNFSF10,BIRC2,NFKB1,BAK1,NGF,CAPN2,PARP1,RELA,TNFRSF10A,PIK3CA,CTSH,GADD45A,JUN,MAP3K5,CASP6,IL3,TP53,GZMB,RIPK1,GADD45G,BIRC3,APAF1,NFKBIA,BID,PRF1,BBC3,CTSK,CASP3,CTSV,BCL2L11,AKT2,TNFRSF10B,BCL2A1,DDIT3,BCL2,ATM,CTSD,CTSS,CTSL,NTRK1,XIAP,FASLG,TP53AIP1,TRAF1,PTPN13,CFLAR,TRAF2,EIF2AK3,CHUK,MCL1,FAS,TNF,BAX,CTSB,CASP8,PIDD1,MAPK8,BIRC5,CASP7,AKT1,CASP10,MAPK1,MAP3K14,BCL2L1,FOS,PMAIP1
Hepatitis B	hsa05161	20.36759939172127	3.999505890801438e-75	7.332427466469304e-74	SOS1,HRAS,IRF3,NFKB1,CCNA2,RELA,IFNA1,RB1,MAP2K6,PIK3CA,MMP9,CCNE2,JUN,CCNE1,TLR3,TP53,E2F3,SRC,TGFB1,NFATC1,APAF1,NFKBIA,BID,MYC,NFATC4,CASP3,AKT2,SMAD3,STAT2,EGR2,STAT5A,CXCL8,IFNAR1,BCL2,IRF7,JAK3,PCNA,FASLG,TGFB2,DDB1,CCNA1,IFNB1,YWHAQ,EP300,SMAD4,TLR2,STAT3,MYD88,CHUK,FAS,TNF,BAX,E2F1,STAT1,CASP8,TGFBR2,MAPK8,IL6,BIRC5,CREBBP,TLR4,CDKN1A,JAK1,JAK2,AKT1,CASP10,MAPK1,ATF2,FOS,DDB2,ELK1
MAPK signaling pathway	hsa04010	15.644578331884833	1.0831251674951414e-74	1.881217396175772e-73	SOS1,CD14,HRAS,FGF2,DUSP6,NFKB1,VEGFB,KIT,PDGFRA,NGF,RELA,MAP2K6,GADD45A,ANGPT2,PDGFB,JUN,NTF3,MAP3K5,KDR,INSR,TP53,TGFB1,GADD45G,NFATC1,PDGFRB,VEGFA,MYC,EGF,CASP3,EPHA2,IL1R1,AKT2,NFKB2,RASGRP1,IGF2,DDIT3,EGFR,HSPB1,CSF1R,IGF1,PDGFA,NTRK1,IL1A,FASLG,TGFB2,DUSP5,PDGFC,CSF1,MRAS,IGF1R,TRAF2,FLT1,MYD88,FGFR1,CHUK,FAS,TNF,IL1B,PGF,VEGFC,FGFR3,DUSP1,TGFBR2,MAPK8,AREG,TGFA,HSPA1A,NF1,MET,AKT1,MAPK1,AT…
Tuberculosis	hsa05152	21.183379120879124	1.4381766313000808e-73	2.372991441645133e-72	CD14,NOD2,NOS2,IL12B,NFKB1,IFNGR1,IL23A,KSR1,RELA,IFNA1,FCGR3A,FCGR1A,LBP,SRC,TGFB1,HLA-DRA,APAF1,HLA-DMA,ITGAX,BID,IRAK2,RHOA,CASP3,AKT2,CIITA,ITGAM,IL10,BCL2,HLA-DRB1,ITGB2,CTSD,CEBPB,CYP27B1,CTSS,IL1A,CD74,PLK3,TGFB2,LSP1,IFNB1,EP300,HSPD1,TLR2,IFNG,MYD88,TNF,BAX,IL1B,HLA-DMB,IL18,SYK,HLA-DQA2,STAT1,CASP8,MAPK8,IL6,IL12A,CREBBP,TLR4,JAK1,JAK2,RIPK2,AKT1,CASP10,MAPK1,C3,VDR,PPP3CA
Viral carcinogenesis	hsa05203	20.393877339544158	5.316634498537752e-71	8.35471135484504e-70	HRAS,IRF3,EIF2AK2,NFKB1,CCNA2,BAK1,RELA,RB1,PIK3CA,CCNE2,MAD1L1,JUN,IRF9,RBL2,CCNE1,CCND2,TP53,CCND3,SRC,CCR4,NFKBIA,CDK4,REL,RHOA,CASP3,CDK6,NFKB2,CCND1,EGR2,STAT5A,CDKN2B,HDAC4,POLB,CDKN1B,CCR5,KAT2B,USP7,IRF7,JAK3,HLA-E,TRAF1,DDB1,CCNA1,YWHAQ,EP300,TRAF2,STAT3,SKP2,BAX,SYK,CHEK1,CASP8,GSN,HLA-G,HDAC7,CDK1,HLA-F,CREBBP,CDKN1A,JAK1,MAPK1,ATF2,C3,IL6ST,CDKN2A,PMAIP1,MDM2
Hepatitis C	hsa05160	21.99977709916858	9.245570796751945e-71	1.3868356195127918e-69	SOS1,HRAS,IRF3,EIF2AK2,NFKB1,BAK1,OAS2,RELA,IFNA1,RB1,PIK3CA,IRF9,TLR3,TP53,E2F3,OAS1,RIPK1,CTNNB1,APAF1,NFKBIA,CDK4,BID,IFIT1,MYC,CLDN5,EGF,CASP3,CDK6,AKT2,STAT2,CCND1,OAS3,EGFR,IFNAR1,MX1,IRF7,CLDN23,CLDN4,FASLG,PPP2R2D,IFNB1,YWHAQ,SOCS3,CFLAR,PPARA,TRAF2,STAT3,CXCL10,IFNG,EIF2AK3,CHUK,FAS,TNF,BAX,E2F1,STAT1,CASP8,CDKN1A,JAK1,AKT1,MAPK1,SCARB1,LDLR,EIF2AK1
Human cytomegalovirus infection	hsa05163	16.923520392056645	1.2166218272249227e-69	1.7455878390618455e-68	SOS1,HRAS,IRF3,NFKB1,PDGFRA,BAK1,CCL2,RELA,IFNA1,B2M,RB1,MAP2K6,PIK3CA,ITGB3,CCL3,BCAR1,TP53,E2F3,ITGAV,SRC,PTGS2,RIPK1,CX3CL1,CTNNB1,NFATC1,NFKBIA,CCL5,CDK4,BID,RHOA,VEGFA,MYC,NFATC4,CASP3,CDK6,IL1R1,AKT2,CCND1,TAP1,CXCL8,EGFR,CXCR4,CCR5,CXCL12,HLA-E,TSC2,FASLG,IFNB1,TRAF2,STAT3,CHUK,FAS,TNF,BAX,IL1B,E2F1,CASP8,HLA-G,IL6,HLA-F,CDKN1A,JAK1,AKT1,CCR1,MAPK1,ATF2,CDKN2A,PPP3CA,ELK1,CCL4,SP1,MDM2,CXC…
Cellular senescence	hsa04218	20.934162895927603	8.52661613859328e-68	1.172409719056576e-66	HRAS,CCNB1,NFKB1,CCNA2,CAPN2,RELA,RB1,MAP2K6,PIK3CA,GADD45A,CCNE2,RBL2,CCNE1,FOXO1,CCND2,TP53,E2F3,CCND3,TGFB1,SERPINE1,GADD45G,SIRT1,NFATC1,CDK4,IGFBP3,MYC,NFATC4,CDK6,CDC25A,AKT2,SMAD3,CCND1,CDKN2B,CXCL8,FOXM1,ATM,HLA-E,IL1A,TSC2,TGFB2,CCNA1,MRAS,FOXO3,ETS1,SLC25A5,MYBL2,E2F1,CHEK1,HIPK2,HLA-G,TGFBR2,IL6,CDK1,HLA-F,CDKN1A,PTEN,NBN,AKT1,MAPK1,CDKN2A,PPP3CA,CHEK2,MDM2
FoxO signaling pathway	hsa04068	22.152553329023917	1.1639617996557725e-66	1.5364295755456196e-65	SOS1,HRAS,TNFSF10,CCNB1,PIK3CA,GADD45A,BNIP3,PCK2,RBL2,FOXO1,CCND2,INSR,PLK2,TGFB1,GADD45G,SIRT1,PLK1,CCNG2,CAT,EGF,PLK4,BCL2L11,AKT2,PRKAB1,SMAD3,CCND1,CDKN2B,SGK1,EGFR,IL10,IGF1,ATM,CDKN1B,USP7,FASLG,PLK3,TGFB2,STK11,CDKN2D,FOXO3,EP300,PCK1,IRS2,SMAD4,IGF1R,STAT3,SOD2,CHUK,SKP2,TGFBR2,MAPK8,IL6,CREBBP,CDKN1A,PTEN,AKT1,MAPK1,BCL6,FBXO32,MDM2
TNF signaling pathway	hsa04668	22.898282847030664	1.1653436280134713e-65	1.4790899894017137e-64	NOD2,BIRC2,NFKB1,CXCL2,CCL2,RELA,CSF2,MAP2K6,PIK3CA,MMP14,MMP9,JUN,VCAM1,MAP3K5,PTGS2,RIPK1,CX3CL1,BIRC3,NFKBIA,CCL5,CASP3,LTA,JUNB,CXCL3,AKT2,CXCL5,BCL3,EDN1,MMP3,CEBPB,SELE,TNFAIP3,ICAM1,TRAF1,IFNB1,CSF1,IRF1,SOCS3,CFLAR,TRAF2,CXCL10,CHUK,FAS,TNF,IL1B,VEGFC,LIF,CASP8,MAPK8,IL6,CASP7,AKT1,CASP10,MAPK1,ATF2,MAP3K14,FOS,CXCL1
AGE-RAGE signaling pathway in diabetic complications	hsa04933	25.942508235917167	1.3911073850265034e-65	1.7002423594768377e-64	HRAS,NFKB1,VEGFB,CCL2,RELA,PIK3CA,JUN,VCAM1,FOXO1,AGTR1,TGFB1,SERPINE1,NFATC1,CDK4,VEGFA,CASP3,AKT2,SMAD3,CCND1,STAT5A,EDN1,F3,CXCL8,AGT,FN1,BCL2,AGER,CDKN1B,MMP2,CYBB,IL1A,SELE,ICAM1,TGFB2,NOS3,SMAD4,STAT3,COL1A2,TNF,BAX,IL1B,VEGFC,STAT1,TGFBR2,MAPK8,IL6,JAK2,THBD,EGR1,AKT1,MAPK1,COL1A1,PRKCE,PIM1
NOD-like receptor signaling pathway	hsa04621	19.473639903188467	3.7898915839614604e-65	4.4666579382402925e-64	NOD2,AIM2,IRF3,BIRC2,NFKB1,CXCL2,TXNIP,OAS2,CCL2,RELA,IFNA1,TRPM2,HSP90AA1,MEFV,JUN,IRF9,GBP1,OAS1,RIPK1,MAP1LC3A,BIRC3,PYCARD,NFKBIA,CCL5,RHOA,CXCL3,STAT2,CASR,CXCL8,IFI16,OAS3,TXN,IFNAR1,BCL2,ANTXR1,MAP1LC3B,IRF7,CYBB,CASP4,XIAP,TNFAIP3,CASP1,IFNB1,DEFB4A,TRAF2,MYD88,CHUK,TNF,IL1B,IL18,NLRC4,CTSB,STAT1,CASP8,MAPK8,IL6,TLR4,JAK1,RIPK2,MAPK1,HSP90AB1,BCL2L1,CXCL1
NF-kappa B signaling pathway	hsa04064	23.75507846346395	9.907310322551777e-65	1.1273835884283057e-63	CD14,UBE2I,BIRC2,NFKB1,CXCL2,PARP1,RELA,TNFSF13B,GADD45A,VCAM1,LBP,PLAU,PTGS2,RIPK1,GADD45G,BIRC3,NFKBIA,LTA,IL1R1,CXCL3,NFKB2,BCL2A1,CXCL8,BCL2,ATM,LTB,CXCL12,XIAP,TNFAIP3,ICAM1,TRAF1,CD40,TNFSF14,CSNK2A1,CFLAR,TRAF2,LCK,MYD88,CHUK,TNF,BTK,IL1B,SYK,PIDD1,TLR4,MAP3K14,BCL2L1,CSNK2B,RELB,CSNK2A2,TRIM25,CXCL1,CCL4,CD40LG,TNFSF11,LY96
Osteoclast differentiation	hsa04380	22.28286246625347	1.3703757742278532e-63	1.5074133516506384e-62	NCF4,NFKB1,IFNGR1,RELA,FCGR3A,MAP2K6,PIK3CA,ITGB3,SPI1,FCGR1A,JUN,IRF9,ACP5,TNFRSF11B,SOCS1,TGFB1,NFATC1,NFKBIA,CTSK,IL1R1,JUNB,AKT2,NFKB2,NCF2,STAT2,TYROBP,CSF1R,IFNAR1,IL1A,NCF1,TGFB2,MITF,IFNB1,CSF1,FOSL1,SOCS3,TRAF2,LCK,IFNG,CHUK,LCP2,TNF,BTK,IL1B,SYK,STAT1,TGFBR2,MAPK8,JAK1,AKT1,MAPK1,MAP3K14,FOS,RELB,PPARG,PPP3CA,TNFSF11
Th17 cell differentiation	hsa04659	23.5817503179932	2.436567653230573e-63	2.5937655663422233e-62	NFKB1,IFNGR1,IL2RA,IL23A,RELA,TBX21,HSP90AA1,JUN,CD4,RXRG,TGFB1,NFATC1,HLA-DRA,NFKBIA,HLA-DMA,RARA,IL2RB,IL21,IL1R1,SMAD3,STAT5A,IL2,HLA-DRB1,IRF4,JAK3,AHR,EBI3,SMAD4,CD3D,STAT3,LCK,IFNG,GATA3,CHUK,IL12RB1,IL1B,HLA-DMB,IL4R,HLA-DQA2,STAT1,TGFBR2,MAPK8,IL6,JAK1,JAK2,IL4,MAPK1,HSP90AB1,IL6ST,RORA,FOS,RUNX1,HIF1A,PPP3CA,FOXP3
Cell cycle	hsa04110	23.92475759534583	1.0485902445790742e-62	1.0813586897221703e-61	CCNB1,CCNA2,RB1,GADD45A,CCNE2,MAD1L1,RBL2,CCNE1,CCND2,TP53,E2F3,CCND3,TGFB1,GADD45G,CDK4,PLK1,MYC,CDK6,CDC25A,MCM5,SMAD3,CDC45,CDKN2C,CCND1,MCM6,CDKN2B,CDKN1C,DBF4,CDC7,ATM,CDKN1B,PCNA,CDC25C,CDC6,TGFB2,CCNA1,CDKN2D,YWHAQ,EP300,SMAD4,SKP2,E2F1,CHEK1,PTTG1,CDK1,CREBBP,CDKN1A,CDKN2A,SFN,RAD21,PRKDC,CHEK2,MCM7,MDM2
Coronavirus disease - COVID-19	hsa05171	20.107702252498637	3.5818070255825166e-62	3.581807025582516e-61	IRF3,IL12B,EIF2AK2,NFKB1,VWF,OAS2,RPS3A,CCL2,RELA,IFNA1,CSF2,PIK3CA,RPS24,F13A1,JUN,IRF9,C1R,TLR3,AGTR1,OAS1,NFKBIA,C3AR1,CFB,NRP1,STAT2,ISG15,MMP3,CXCL8,IL2,OAS3,EGFR,IFNAR1,MX1,CYBB,CASP1,IFNB1,ADAR,TLR2,STAT3,CXCL10,MYD88,CHUK,TNF,IL1B,ADAM17,SYK,ACE,STAT1,MAPK8,IL6,IL12A,TLR4,JAK1,MAPK1,RPS27L,C3,IL6ST,FOS,MMP1
Hematopoietic cell lineage	hsa04640	25.420054945054947	2.6277325911211238e-61	2.550446338441091e-60	CD14,ITGA2,IL2RA,KIT,DNTT,ITGA5,CSF2,ITGB3,CD8A,FCGR1A,MME,CD4,IL3,IL5RA,CD5,HLA-DRA,TFRC,HLA-DMA,CD24,IL1R1,CD34,GP9,ITGAM,CD44,CSF1R,HLA-DRB1,IL1A,IL5,CD22,CSF1,CD3D,CD33,TNF,FCER2,CSF2RA,CD19,IL1B,CD9,HLA-DMB,IL4R,CSF3R,HLA-DQA2,IL6,ANPEP,GP5,IL4,ITGA4,CR2,EPO,EPOR,ITGA2B
Rheumatoid arthritis	hsa05323	28.218944856048928	9.311560561714477e-59	8.779471386759363e-58	CXCL2,IL23A,CCL2,TNFSF13B,CSF2,JUN,CCL3,ACP5,ITGAL,TGFB1,HLA-DRA,HLA-DMA,CCL5,VEGFA,CTSK,PTH,CD80,CXCL3,CXCL5,MMP3,CXCL8,CD28,HLA-DRB1,ITGB2,LTB,CXCL12,CTSL,IL1A,ICAM1,TGFB2,CSF1,TLR2,IFNG,FLT1,TNF,IL1B,HLA-DMB,IL18,CD86,HLA-DQA2,IL6,TLR4,FOS,MMP1,CXCL1,TNFSF11
Fluid shear stress and atherosclerosis	hsa05418	21.1100802311875	1.5147246752688773e-58	1.388497618996471e-57	NFKB1,CAV1,CCL2,RELA,MAP2K6,PIK3CA,MMP9,ITGB3,HSP90AA1,PDGFB,JUN,VCAM1,MAP3K5,GSTP1,NFE2L2,KDR,TP53,ITGAV,NQO1,SRC,CTNNB1,RHOA,VEGFA,IL1R1,AKT2,NCF2,EDN1,TXN,BMP4,BCL2,PECAM1,PDGFA,CAV2,MMP2,CTSL,IL1A,NCF1,SELE,ICAM1,HMOX1,NOS3,IFNG,CHUK,TNF,IL1B,CDH5,DUSP1,MAPK8,THBD,AKT1,HSP90AB1,PLAT,FOS,ITGA2B
Proteoglycans in cancer	hsa05205	15.94983839689722	1.5020283367527728e-55	1.3396468949416623e-54	SOS1,TIMP3,HRAS,ITGA2,IL12B,FGF2,CAV1,PLAUR,ITGA5,PIK3CA,MMP9,ITGB3,KDR,TP53,ITGAV,PLAU,SRC,TGFB1,CTNNB1,RHOA,VEGFA,MYC,CASP3,AKT2,ESR1,CCND1,EZR,IGF2,CD44,EGFR,IGF1,FN1,CAV2,MMP2,CTSL,FASLG,TGFB2,WNT4,MRAS,IGF1R,TLR2,STAT3,ITGB1,FGFR1,COL1A2,FAS,TNF,WNT7A,TLR4,CDKN1A,MET,AKT1,MAPK1,HGF,COL1A1,HIF1A,VAV1,ELK1,THBS1,MDM2
Prostate cancer	hsa05215	21.953429254156287	2.1622721065995398e-54	1.8777626188890739e-53	SOS1,HRAS,NFKB1,PDGFRA,RELA,RB1,PIK3CA,MMP9,CCNE2,HSP90AA1,PDGFB,GSTP1,CCNE1,FOXO1,TP53,E2F3,PLAU,CTNNB1,NFKBIA,PDGFRB,ERG,EGF,KLK3,AKT2,CCND1,MMP3,EGFR,TCF7L2,IGF1,BCL2,AR,PDGFA,ZEB1,CDKN1B,PDGFC,EP300,IGF1R,FGFR1,CHUK,E2F1,TGFA,CREBBP,CDKN1A,PTEN,AKT1,MAPK1,HSP90AB1,PLAT,MDM2
Small cell lung cancer	hsa05222	24.456418875242402	3.011300697165505e-54	2.5480236668323503e-53	NOS2,ITGA2,BIRC2,NFKB1,BAK1,RELA,RB1,PIK3CA,FHIT,GADD45A,CCNE2,RXRG,CCNE1,TP53,E2F3,ITGAV,PTGS2,GADD45G,BIRC3,APAF1,NFKBIA,CDK4,MYC,CASP3,CDK6,AKT2,CCND1,CDKN2B,FN1,RARB,BCL2,CDKN1B,XIAP,TRAF1,TRAF2,ITGB1,CHUK,SKP2,BAX,E2F1,CDKN1A,PTEN,AKT1,BCL2L1,DDB2,ITGA2B
Toxoplasmosis	hsa05145	22.517418913266667	4.742269805357473e-54	3.912372589419915e-53	NOS2,IL12B,BIRC2,NFKB1,IFNGR1,PIK3R5,RELA,MAP2K6,SOCS1,TGFB1,BIRC3,HLA-DRA,NFKBIA,HLA-DMA,ALOX5,CASP3,AKT2,CIITA,IL10,BCL2,HLA-DRB1,CCR5,XIAP,TGFB2,CD40,TLR2,STAT3,IFNG,ITGB1,MYD88,CHUK,TNF,HLA-DMB,HLA-DQA2,STAT1,CASP8,MAPK8,IL12A,HSPA1A,TLR4,JAK1,JAK2,AKT1,MAPK1,BCL2L1,LDLR,CD40LG,LY96
Viral protein interaction with cytokine and cytokine receptor	hsa04061	26.18630184565215	6.111741027842678e-54	4.919206193141668e-53	TNFSF10,CXCL2,IL2RA,CCL2,TNFRSF10A,CXCL9,TNFRSF10D,CCL3,CCR4,CX3CL1,CCL5,IL2RB,CCR7,LTA,CXCL3,CXCL5,TNFRSF10B,PPBP,CXCL8,IL2,IL10,CSF1R,CXCR4,CCR5,CCL16,CXCL12,CXCR1,IL19,TNFSF14,CSF1,CXCL10,CCL11,PF4,TNF,IL18,IL24,IL6,CCL22,CCR1,IL6ST,TNFRSF10C,CXCL1,CCL4,CXCR2
Alzheimer disease	hsa05010	14.290317638838552	7.55711339868358e-54	5.937731956108528e-53	HRAS,NOS2,EIF2AK2,NFKB1,ULK1,NOS1,LPL,CAPN2,RELA,ADAM10,PIK3CA,MME,MAP3K5,APP,INSR,PTGS2,CTNNB1,APAF1,BID,CASP3,GRIN2D,AKT2,RTN4,DDIT3,AGER,CHRNA7,CYBB,IL1A,NDUFAB1,ATP2A2,WNT4,CSF1,CSNK2A1,ATP2A3,PSEN1,IRS2,TRAF2,LRP5,EIF2AK3,CHUK,AXIN2,PSEN2,FAS,TNF,DKK1,SLC25A5,IL1B,ADAM17,CASP8,MAPK8,IL6,WNT7A,CASP7,COX4I1,AKT1,MAPK1,CDK5,CSNK2B,CSNK2A2,PPP3CA,APOE,CDK5R1
Pathways of neurodegeneration - multiple diseases	hsa05022	12.15906962992165	1.6037659798817768e-53	1.230797147351131e-52	HRAS,NOS2,NFKB1,ULK1,HSPA5,BAK1,NOS1,CAPN2,VCP,RELA,MAP2K6,MAP3K5,APP,PTGS2,MAP1LC3A,CTNNB1,NEFL,APAF1,BID,CAT,CASP3,GRIN2D,SOD1,PINK1,DDIT3,ATXN2,BCL2,AGER,MAP1LC3B,HTT,CHRNA7,CYBB,IL1A,FASLG,UBE2L3,NDUFAB1,ATP2A2,WNT4,CSF1,CSNK2A1,ATP2A3,PSEN1,TRAF2,LRP5,EIF2AK3,AXIN2,PSEN2,FAS,TNF,BAX,DKK1,SLC25A5,IL1B,GPX1,CASP8,MAPK8,IL6,WNT7A,CASP7,COX4I1,UBC,MAPK1,BCL2L1,CDK5,CSNK2B,CSNK2A2,PPP3CA,CDK5R1
Leishmaniasis	hsa05140	26.7907441822883	2.037851846464021e-53	1.4986645194876884e-52	NOS2,IL12B,NCF4,NFKB1,IFNGR1,RELA,FCGR3A,FCGR1A,JUN,PTGS2,TGFB1,HLA-DRA,NFKBIA,HLA-DMA,NCF2,ITGAM,IL10,HLA-DRB1,ITGB2,CYBB,IL1A,NCF1,TGFB2,TLR2,IFNG,ITGB1,MYD88,TNF,IL1B,HLA-DMB,HLA-DQA2,STAT1,IL12A,TLR4,EEF1A1,JAK1,JAK2,IL4,ITGA4,MAPK1,C3,FOS,ELK1
Necroptosis	hsa04217	21.237556561085974	2.0436334356650296e-53	1.4986645194876884e-52	TNFSF10,BIRC2,EIF2AK2,IFNGR1,CAPN2,PARP1,IFNA1,TNFRSF10A,HSP90AA1,IRF9,TLR3,RIPK1,SMPD1,BIRC3,PYCARD,BID,CHMP4C,STAT2,TNFRSF10B,STAT5A,HMGB1,IFNAR1,BCL2,JAK3,SPATA2,CYBB,XIAP,IL1A,FASLG,TNFAIP3,CASP1,IFNB1,CFLAR,TRAF2,STAT3,IFNG,FAS,TNF,BAX,SLC25A5,IL1B,STAT1,CASP8,MAPK8,TLR4,JAK1,JAK2,HSP90AB1,PLA2G4A
Focal adhesion	hsa04510	16.119517528779106	3.7558425635937176e-53	2.6944087956215798e-52	SOS1,HRAS,ITGA2,BIRC2,VEGFB,VWF,CAV1,PDGFRA,CAPN2,ITGA5,PIK3CA,ITGB3,PDGFB,JUN,SPP1,KDR,CCND2,BCAR1,ITGAV,CCND3,SRC,BIRC3,CTNNB1,PDGFRB,RHOA,VEGFA,COL2A1,EGF,AKT2,TNC,CCND1,EGFR,IGF1,FN1,BCL2,PDGFA,CAV2,XIAP,PDGFC,IGF1R,FLT1,ITGB1,COL1A2,PGF,VEGFC,MAPK8,MET,PTEN,ITGA4,AKT1,MAPK1,HGF,COL1A1,VAV1,ELK1,THBS1,ITGA2B
Chemical carcinogenesis - receptor activation	hsa05207	17.36474341597681	1.4330173240325348e-52	1.0061610998526308e-51	SOS1,HRAS,FGF2,KLF4,NFKB1,UGT2B15,ESR2,RELA,RB1,PIK3CA,HSP90AA1,JUN,CYP2B6,RXRG,CCND3,SRC,VEGFA,MYC,EGF,CDC25A,AKT2,ESR1,CCND1,STAT5A,NOTCH2,EGFR,BCL2,AR,CHRNA7,CDC6,XIAP,AHR,UGT1A6,UGT1A4,PPARA,STAT3,CHRNB4,E2F1,ADRB3,CYP1B1,BIRC5,PGR,JAK2,CYP3A4,CYP1A1,AKT1,MAPK1,ATF2,HSP90AB1,BCL6,VDR,FOS,ARNT,TNFSF11
Cell adhesion molecules	hsa04514	24.36780866192631	7.690256495198779e-52	5.2870513404491607e-51	CD58,PTPRC,MADCAM1,CD99,MPZ,CD8A,VCAM1,CD4,ITGAL,ITGAV,CDH3,HLA-DRA,HLA-DMA,CLDN5,CD80,NTNG2,CD34,SPN,ITGAM,CD274,CD28,PECAM1,HLA-DRB1,ITGB2,CLDN23,HLA-E,CLDN4,CD6,SELE,CD22,ICAM1,CDH1,CD40,MAG,ITGB1,HLA-DMB,CD86,CDH5,HLA-DQA2,HLA-G,HLA-F,VCAN,ITGA4,CD40LG
Inflammatory bowel disease	hsa05321	28.481854280173604	1.6009755157751352e-51	1.078208000419989e-50	NOD2,IL12B,NFKB1,IFNGR1,IL23A,RELA,TBX21,MAF,JUN,IL12RB2,TGFB1,NFATC1,HLA-DRA,HLA-DMA,IL21,SMAD3,IL2,IL10,HLA-DRB1,IL1A,IL5,TGFB2,TLR2,STAT3,IFNG,GATA3,TNF,IL12RB1,IL1B,HLA-DMB,IL4R,IL18,HLA-DQA2,STAT1,IL6,IL12A,TLR4,IL4,RORA,FOXP3
C-type lectin receptor signaling pathway	hsa04625	21.579193125213887	1.1581793615129752e-50	7.643983785985636e-50	HRAS,IL12B,NFKB1,IL23A,KSR1,RELA,PIK3CA,JUN,IRF9,SRC,PTGS2,NFATC1,PYCARD,NFKBIA,RHOA,NFATC4,AKT2,NFKB2,STAT2,IL17D,BCL3,EGR2,IL2,IL10,CBLB,PLK3,CASP1,LSP1,IRF1,MRAS,CHUK,TNF,IL1B,SYK,STAT1,CASP8,MAPK8,IL6,IL12A,CCL22,AKT1,MAPK1,MAP3K14,RELB,PPP3CA,MDM2
