# Supplementary material for: DNA Methylation Signature in Mononuclear Cells and Proinflammatory Cytokines May Define Molecular Subtypes in Sporadic Meniere Disease
Source: Preprints.org preprint supplement (doi:10.20944/preprints202110.0030.v1), 2021-10-01
Supplement: Supplementary file 9 [file Table_S2.xls]

## Sheet: Folha1
Position	Gene	Strand	mean MD	mean Control	∆Mean	t-test	DF	p-value	padjust	CI_1	CI_2	SE
chr1:101383150	LINC01307	-	0.454319557671341	0.596037132801839	-0.141717575130498	-3.78236992838023	17.1214794019904	0.00147064811315867	0.020542993327173	-0.220725295722442	-0.0627098545385533	0.0374679309041533
chr1:101768050	LINC01709	-	0.615296157930189	0.69858313300819	-0.0832869750780015	-4.49968667870863	10.3208073387962	0.00105684497007234	0.0168469434883883	-0.124355616871569	-0.0422183332844343	0.0185095054444778
chr1:102225645	AC114485.1	+	0.420920346161181	0.50844277673546	-0.0875224305742791	-3.94580077311381	9.29503556270969	0.00316926083373981	0.0327534691762499	-0.137457960294483	-0.0375869008540752	0.02218115804798
chr1:103059598	COL11A1	+	0.588126344757693	0.690738274071607	-0.102611929313914	-5.22350519801093	8.23368335947473	0.00072863520395338	0.0134965350345621	-0.147688874169089	-0.0575349844587399	0.0196442667182543
chr1:103471553	AC095032.1	-	0.536290196277536	0.647568146209451	-0.111277949931914	-7.83627323124981	17.91190754351	3.39676619620326e-07	0.000170232749634793	-0.141122333075163	-0.0814335667886656	0.0142003662516712
chr1:104202430	AC092506.1	+	0.595335359453874	0.735060750376171	-0.139725390922297	-3.50771856518204	11.9336393194808	0.00435459320568425	0.0397613014582428	-0.226569113933531	-0.0528816679110634	0.0398336948434875
chr1:105983794	LINC01677	-	0.573216534815029	0.66030578898226	-0.0870892541672309	-5.59959765542387	8.97209143788114	0.000338226384280974	0.00856164351672066	-0.122288753661205	-0.0518897546732563	0.0155527699535474
chr1:105983794	AL355306.2	-	0.573216534815029	0.66030578898226	-0.0870892541672309	-5.59959765542387	8.97209143788114	0.000338226384280974	0.00856164351672066	-0.122288753661205	-0.0518897546732563	0.0155527699535474
chr1:106042448	AL355306.2	-	0.584288850595242	0.70770206633378	-0.123413215738538	-6.63951096275758	11.6288485363258	2.79510531409144e-05	0.00197825891505408	-0.164056153174827	-0.0827702783022492	0.0185876966588035
chr1:107171830	NTNG1	-	0.64120250474945	0.785604194655919	-0.144401689906469	-5.29966819446294	7.65327074081868	0.000842136176715535	0.0147199400015996	-0.207733049709997	-0.0810703301029417	0.0272473076818921
chr1:107204267	NTNG1	-	0.623471083173312	0.723724215934361	-0.100253132761049	-9.62969242896691	10.1340103337309	2.0284422215533e-06	0.000439515855036678	-0.123408404905351	-0.0770978606167467	0.0104108343543226
chr1:107735408	VAV3	+	0.643400081748977	0.748999111434927	-0.10559902968595	-8.17357187098755	8.93974421500386	1.94097908039649e-05	0.00159509033150352	-0.13485518219678	-0.0763428771751197	0.0129195694798719
chr1:107957770	VAV3	+	0.48064696386989	0.563518518518519	-0.0828715546486284	-6.39712855759388	17.751625014268	5.39378130402166e-06	0.000762122721358295	-0.110115255136422	-0.0556278541608345	0.0129544926137608
chr1:108176845	SLC25A24	+	0.515429848881584	0.281084261267188	0.234345587614396	3.86272940462526	7.95881897978675	0.00483782227550765	0.0423792919030917	0.094317918718057	0.374373256510735	0.0606683935286248
chr1:108182935	SLC25A24	+	0.550019565835485	0.316622585498925	0.23339698033656	3.89420768256375	8.31089320924078	0.00425603633780157	0.0392022791513238	0.0960827947784497	0.37071116589467	0.0599343947118155
chr1:110621427	KCNA2	+	0.541183166813225	0.633704591939619	-0.0925214251263944	-11.9350314813676	14.9419447737928	4.86355701504679e-09	2.19993336814907e-05	-0.109050204795758	-0.075992645457031	0.0077520889049044
chr1:111303403	CHIA	-	0.621693109408662	0.709214743589744	-0.0875216341810817	-8.37771764808383	11.2303954247793	3.65881239654618e-06	0.000613834066913187	-0.110457803603447	-0.0645854647587165	0.010446954392298
chr1:111866350	KCND3	-	0.634703436805695	0.732391947301203	-0.0976885104955086	-7.72999852724369	7.73647928788289	6.69360796958249e-05	0.00328825122501834	-0.127004524266424	-0.0683724967245937	0.012637584619352
chr1:112180931	AL445426.1	-	0.617966062022895	0.711775846702317	-0.093809784679422	-5.11170458450808	15.0139494388095	0.000127275785054151	0.00480371462273673	-0.132922890781395	-0.0546966785774491	0.0183519573810523
chr1:112306337	AL445426.1	+	0.622225025800541	0.702978502978503	-0.0807534771779623	-5.57332779664392	11.5107692265139	0.000141227486111989	0.00510230781914901	-0.112472352749043	-0.0490346016068819	0.0144892746532134
chr1:112341551	AL445426.1	+	0.621074185461728	0.70727697931302	-0.0862027938512924	-3.60297413156164	13.8142042015267	0.00293806017540603	0.031265711922554	-0.137582614878682	-0.0348229728239028	0.0239254545560474
chr1:113554573	MAGI3	+	0.626426801489827	0.715069946107098	-0.0886431446172712	-4.74343066615503	17.8237290969563	0.000166418601563407	0.00561746249393992	-0.127932101245646	-0.0493541879888966	0.0186875598814485
chr1:113997771	OLFML3	+	0.625556566184457	0.727971924846925	-0.102415358662468	-5.14932408152933	8.36483057854687	0.000760683914531334	0.013858442477288	-0.14793380894396	-0.0568969083809755	0.0198890877794685
chr1:114884284	SYCP1	-	0.59735999479429	0.701718338446027	-0.104358343651737	-8.28669364943291	12.1341913247295	2.42815252514474e-06	0.000487867143246158	-0.131763571037648	-0.0769531162658268	0.0125934839716054
chr1:114920399	SYCP1	-	0.572204640045197	0.676874514374514	-0.104669874329317	-5.63030599254874	10.4432993776311	0.000185904047076159	0.00599681838896391	-0.145854857724887	-0.0634848909337473	0.0185904415262402
chr1:117977706	SPAG17	-	0.654820372818493	0.759900670794634	-0.10508029797614	-5.56219654190724	10.1073974279738	0.000230862289500611	0.00681409259429304	-0.147113460754275	-0.0630471351980055	0.0188918707176984
chr1:117977840	SPAG17	-	0.660716813481245	0.753593731222285	-0.09287691774104	-6.26510047474222	9.0830582885941	0.000141293468421758	0.00510348160267134	-0.126365556088418	-0.0593882793936621	0.014824489745292
chr1:118010946	SPAG17	+	0.570739023298106	0.655399469811235	-0.0846604465131281	-5.62011173357797	17.8315026242321	2.56379918832622e-05	0.00188095907699581	-0.116329843182056	-0.0529910498441998	0.0150638368997746
chr1:119672630	PHGDH	-	0.518696793978989	0.624807209710965	-0.106110415731976	-6.35315711528918	12.1330012985887	3.46742501990612e-05	0.00224987260130708	-0.142456748949297	-0.0697640825146551	0.0167019977322167
chr1:120305596	AC244669.2	+	0.639565161385615	0.73597959064711	-0.0964144292614951	-8.79841378071714	8.04085063972467	2.11939448148443e-05	0.00167809574163181	-0.121661663714092	-0.0711671948088984	0.0109581603757713
chr1:120305596	AC244669.1	+	0.639565161385615	0.73597959064711	-0.0964144292614951	-8.79841378071714	8.04085063972467	2.11939448148443e-05	0.00167809574163181	-0.121661663714092	-0.0711671948088984	0.0109581603757713
chr1:14387101	KAZN	-	0.644761297192116	0.748671063995197	-0.103909766803081	-6.75196426929667	17.2634532401436	3.12284695850379e-06	0.000559144915900488	-0.136341198015275	-0.0714783355908876	0.0153895611201013
chr1:14387101	KAZN-AS1	-	0.644761297192116	0.748671063995197	-0.103909766803081	-6.75196426929667	17.2634532401436	3.12284695850379e-06	0.000559144915900488	-0.136341198015275	-0.0714783355908876	0.0153895611201013
chr1:146129748	NBPF10	-	0.557884261183951	0.65595058536235	-0.0980663241783994	-4.67566211980128	8.82214612593897	0.00122321583103658	0.0183667177983508	-0.145658525223215	-0.0504741231335837	0.0209737833200332
chr1:146156163	NBPF10	+	0.550994678327717	0.458848056130665	0.0921466221970519	3.7149264602669	13.0254446811246	0.00258704833789479	0.0288958288745457	0.0385705546042061	0.145722689789898	0.0248044270008057
chr1:146156163	NOTCH2NLA	+	0.550994678327717	0.458848056130665	0.0921466221970519	3.7149264602669	13.0254446811246	0.00258704833789479	0.0288958288745457	0.0385705546042061	0.145722689789898	0.0248044270008057
chr1:147332815	LINC00624	+	0.648899536427978	0.733604497354497	-0.0847049609265196	-8.32890834743119	8.98777783679545	1.61549573980349e-05	0.0014312011736225	-0.107715859094404	-0.0616940627586347	0.0101699955616206
chr1:147467675	LINC00624	-	0.611006971308631	0.694785670908378	-0.0837786995997467	-8.30052243858801	11.5268282693301	3.3692408371218e-06	0.00058371084166522	-0.105870397614802	-0.0616870015846912	0.0100931839193965
chr1:148490502	LINC01138	+	0.640924655695438	0.735227563712218	-0.0943029080167803	-6.42119807426248	11.0038787522205	4.92602959441264e-05	0.00276112391202904	-0.12662559496281	-0.0619802210707507	0.0146861858061607
chr1:148494487	LINC01138	-	0.55421079233205	0.660802684677988	-0.106591892345939	-4.69397043978022	10.7988934968614	0.00069001307302491	0.0130717723041219	-0.156686227536435	-0.0564975571554418	0.0227082581182445
chr1:148812699	PDE4DIP	+	0.654279479954153	0.743735431235431	-0.0894559512812787	-7.61464947044006	12.1041788764552	5.89524189392509e-06	0.000804776361737247	-0.115027959893278	-0.0638839426692798	0.0117478751488884
chr1:148815314	PDE4DIP	-	0.561837214550201	0.644388329454568	-0.0825511149043665	-3.907184823656	10.6415607647491	0.00260255756896748	0.0289954482471007	-0.129245412843732	-0.0358568169650013	0.0211280291642621
chr1:148835395	PDE4DIP	+	0.606609925899157	0.487902330417528	0.118707595481629	4.82554272697794	8.42503728226174	0.00113330809294739	0.0175573429385908	0.0624745597298964	0.174940631233362	0.0245998434161563
chr1:148851878	PDE4DIP	+	0.567867579248605	0.675594007247233	-0.107726427998628	-6.74166147682401	8.82444090839844	9.26809293718827e-05	0.00399504627961689	-0.143983833776007	-0.0714690222212487	0.0159792105208726
chr1:148869171	PDE4DIP	-	0.633741737641753	0.734552212493389	-0.100810474851636	-5.99864285117054	10.4071023760532	0.000112386854905865	0.00446884359075285	-0.138057966569678	-0.0635629831335943	0.0168055470800307
chr1:148875902	PDE4DIP	-	0.462003289422644	0.587963664687803	-0.125960375265158	-9.96734554236604	17.9266343223928	9.76964482363471e-09	2.91498851352751e-05	-0.152518156314622	-0.0994025942156948	0.0126373039571836
chr1:148880544	PDE4DIP	-	0.564017467004752	0.68485982727362	-0.120842360268868	-4.90562348806384	16.2615456035795	0.000151300764889547	0.00530778901231826	-0.172994733166795	-0.0686899873709421	0.0246334355995516
chr1:148956181	PDE4DIP	+	0.453455929008541	0.342720049241788	0.110735879766753	10.6848803726484	17.145753351148	5.3194237407936e-09	2.24764764750592e-05	0.0888843403776889	0.132587419155817	0.0103637921908999
chr1:149083104	NBPF9	-	0.654429436110108	0.738976100185202	-0.0845466640750931	-5.52586101195477	16.3197639977809	4.28956306402421e-05	0.00254166246761502	-0.116930021392464	-0.0521633067577226	0.0153001792647667
chr1:152239896	FLG-AS1	-	0.531080423733152	0.649956914513607	-0.118876490780455	-5.17799964416511	17.5435836415405	6.85346562777491e-05	0.00333612390884033	-0.167199552265369	-0.0705534292955402	0.0229579951621689
chr1:153601786	BX470102.2	+	0.63097854526426	0.713719504895975	-0.0827409596317159	-7.48182259518181	17.9884508246395	6.30037951656704e-07	0.000230158324636548	-0.105975980740459	-0.0595059385229726	0.0110589309729156
chr1:154032715	NUP210L	+	0.609701654554596	0.69724054381478	-0.0875388892601843	-3.90766113061869	9.88229174415052	0.00299089912168078	0.0316160382009591	-0.137534056025358	-0.0375437224950102	0.0224018629901832
chr1:155475069	ASH1L	-	0.427962628060995	0.316280297802037	0.111682330258958	4.73957826555041	12.4814035553826	0.000431772216775703	0.00990389715517092	0.060560052550158	0.162804607967758	0.0235637696017639
chr1:157295541	AL138900.2	+	0.66666871509933	0.752305718972386	-0.0856370038730557	-6.19519340983018	9.75906187308901	0.000113332390282001	0.00449517492186834	-0.116540255162048	-0.0547337525840638	0.0138231364556225
chr1:157814609	FCRL1	+	0.525679304803885	0.697512795655211	-0.171833490851325	-3.48629108447609	10.2956528797675	0.00561092609010211	0.0463047429110746	-0.281228773628945	-0.0624382080737057	0.0492883372867151
chr1:157927800	AL139010.1	-	0.623531473118235	0.708769542974969	-0.0852380698567345	-8.28372681265747	12.5295979521473	1.96097050095968e-06	0.000430665863505971	-0.107553013919381	-0.0629231257940882	0.0102898214516794
chr1:158837079	MNDA	-	0.463934074956242	0.570046366124798	-0.106112291168555	-5.90169625970498	14.4239271411359	3.41321398017034e-05	0.00222987061095963	-0.144569420184469	-0.0676551621526407	0.0179799648269021
chr1:159013941	IFI16	+	0.602588960232918	0.697234656894477	-0.0946456966615594	-8.23054735180941	12.0809192747432	2.68440626644445e-06	0.000516536175496634	-0.119681962159865	-0.0696094311632543	0.0114993198648875
chr1:159369731	AL513323.1	-	0.534213492979974	0.700328575328575	-0.166115082348602	-4.00964797351819	13.6861422837483	0.00134736400406961	0.0194605918021598	-0.25516266632328	-0.077067498373923	0.0414288444885218
chr1:159419924	AL513323.1	-	0.584507719865295	0.692357471474347	-0.107849751609052	-6.54776098177302	17.9613788859751	3.78377018214079e-06	0.000626457220195898	-0.142459879968309	-0.0732396232497943	0.0164712413769031
chr1:159464657	AL513323.1	-	0.652967825579502	0.738785288785289	-0.085817463205787	-3.8096184232012	8.38877584351072	0.00473018980760401	0.0418174175310298	-0.137347643699301	-0.0342872827122728	0.0225265246207191
chr1:161771111	ATF6	-	0.53339541158807	0.44973935307987	0.0836560585081998	5.68112944268092	14.6905281600911	4.71855965076503e-05	0.00269470770408513	0.0522122431026849	0.115099873913715	0.0147252512642491
chr1:163125070	RGS5	+	0.628870117332466	0.74024559318677	-0.111375475854304	-10.5414281669666	16.0702488824533	1.25613835015194e-08	3.21591197751712e-05	-0.133765383914137	-0.0889855677944712	0.0105655015705859
chr1:163209590	RGS5	-	0.612782969940854	0.697257446888361	-0.0844744769475073	-7.15104901776309	10.5582034459039	2.325005500468e-05	0.00177132936333701	-0.110607802074322	-0.0583411518206931	0.0118128790248359
chr1:163209590	AL499616.1	-	0.612782969940854	0.697257446888361	-0.0844744769475073	-7.15104901776309	10.5582034459039	2.325005500468e-05	0.00177132936333701	-0.110607802074322	-0.0583411518206931	0.0118128790248359
chr1:165321950	LMX1A	+	0.640041751635818	0.768775847808106	-0.128734096172288	-7.69792723698713	17.5218614487252	5.03770530426574e-07	0.000204297769102043	-0.163937116809828	-0.0935310755347469	0.0167232155110201
chr1:16565159	NBPF1	+	0.556912027924473	0.648660799602492	-0.0917487716780192	-3.98480533878123	8.01204100111376	0.00402223754818193	0.0378799577230018	-0.144829837263307	-0.0386677060927316	0.0230246558809523
chr1:166576830	FMO8P	+	0.615547614580122	0.724434092477571	-0.108886477897448	-4.75772372716496	10.0112339209969	0.000768794411575693	0.0139487287833638	-0.159872476335206	-0.057900479459691	0.0228862548860801
chr1:166959845	ILDR2	+	0.612692699395149	0.709953703703704	-0.0972610043085544	-6.04544347678258	11.4805780432046	6.98887112200745e-05	0.00337560600464324	-0.132491139458988	-0.0620308691581206	0.0160883158832075
chr1:167097954	DUSP27	+	0.588349572171659	0.725121302082086	-0.136771729910427	-7.00905957025323	13.9638967477718	6.2466150012099e-06	0.000831823018754246	-0.178634315399449	-0.0949091444214053	0.0195135636299758
chr1:167097954	GPA33	+	0.588349572171659	0.725121302082086	-0.136771729910427	-7.00905957025323	13.9638967477718	6.2466150012099e-06	0.000831823018754246	-0.178634315399449	-0.0949091444214053	0.0195135636299758
chr1:167813681	ADCY10	+	0.490661240277603	0.613109615827007	-0.122448375549404	-3.38907139430661	11.815803657809	0.00548893289538385	0.0456982491484769	-0.201305993094182	-0.0435907580046252	0.0361303617725811
chr1:168780643	AL135926.1	-	0.527447587426579	0.632990443652208	-0.105542856225629	-6.39813267476619	10.1203294715451	7.43924700990137e-05	0.0035104271302238	-0.142238826353384	-0.0688468860978744	0.0164958842822818
chr1:169418769	CCDC181	-	0.574996923712117	0.657482066009415	-0.0824851422972981	-4.15728638831099	8.56411351181949	0.00273788994741773	0.029931564992781	-0.127719488114389	-0.0372507964802068	0.0198411017651372
chr1:170793496	BX284613.2	-	0.398144866642309	0.549697293447293	-0.151552426804984	-3.85544704173331	13.2780517581827	0.00191522010750815	0.024077506112019	-0.236293190052728	-0.0668116635572408	0.0393086521911737
chr1:170848955	BX284613.2	-	0.556015372255592	0.653737822244496	-0.0977224499889038	-6.51387991448212	10.7507009344117	4.83788580042412e-05	0.00273321180687132	-0.130835703009588	-0.0646091969682199	0.0150021878315012
chr1:170956382	MROH9	-	0.599585401042048	0.679914977784812	-0.0803295767427644	-5.14420141843532	7.0081918043299	0.00132774506217094	0.0192890169627726	-0.117245756666004	-0.0434133968195245	0.0156155582195687
chr1:170956382	BX284613.2	-	0.599585401042048	0.679914977784812	-0.0803295767427644	-5.14420141843532	7.0081918043299	0.00132774506217094	0.0192890169627726	-0.117245756666004	-0.0434133968195245	0.0156155582195687
chr1:172300388	DNM3	-	0.632092095824957	0.721285273368607	-0.0891931775436493	-7.91092190768642	7.20750108132921	8.37653491959164e-05	0.00376195024057157	-0.115698770209324	-0.062687584877975	0.0112746881570133
chr1:172428194	C1orf105	-	0.499437621202327	0.40647848883143	0.0929591323708971	6.87770627078699	7.97979389414204	0.000128890771678101	0.00483709686735847	0.0617774194123748	0.124140845329419	0.013516007911786
chr1:172428194	PIGC	-	0.499437621202327	0.40647848883143	0.0929591323708971	6.87770627078699	7.97979389414204	0.000128890771678101	0.00483709686735847	0.0617774194123748	0.124140845329419	0.013516007911786
chr1:172786024	AL031599.1	-	0.594731385391964	0.694948352557048	-0.100216967165084	-7.49477989187008	7.31391405113363	0.000110556697797776	0.0044272558566786	-0.131562668025171	-0.0688712663049969	0.0133715690935492
chr1:172899943	AL031599.1	-	0.35166587929913	0.528504450950832	-0.176838571651702	-4.92897534490935	7.71287898826658	0.00128049412365166	0.0188765009493584	-0.260111055105286	-0.0935660881981189	0.0358773496066158
chr1:172900235	AL031599.1	-	0.450318078374537	0.345040901023847	0.10527717735069	5.20114313281	7.7434422037429	0.000910832411967357	0.0154316633490105	0.0583304133270026	0.152223941374377	0.020241161349046
chr1:173751663	KLHL20	-	0.691757796560248	0.818433123505587	-0.126675326945339	-8.33140267383919	15.3422824912627	4.42402180711655e-07	0.000191871212530098	-0.159020224865438	-0.0943304290252399	0.015204561813235
chr1:173838521	DARS2	-	0.597366012382454	0.697301587301587	-0.0999355749191335	-5.56033080105179	8.84420314677961	0.000374398079964228	0.00910397977723416	-0.140702662322306	-0.0591684875159611	0.0179729549364634
chr1:174238307	RABGAP1L	-	0.617676809246046	0.53414627039627	0.0835305388497752	5.07522452705424	17.9917824130445	7.90221655386766e-05	0.00363594195226161	0.0489513995932379	0.118109678106313	0.0164584913247687
chr1:176285273	AL591043.2	-	0.651898844611061	0.73482087593453	-0.0829220313234691	-5.50342728984105	10.7252135056877	0.000202867792347836	0.00631401698808277	-0.116188990083385	-0.0496550725635528	0.0150673438489026
chr1:176401153	AL591043.2	-	0.575849790654435	0.67981800119958	-0.103968210545145	-4.76016687450945	6.92209968045481	0.00212296760910784	0.0256287097210127	-0.155732725214303	-0.052203695875988	0.0218412953339708
chr1:176675825	PAPPA2	+	0.533564667148204	0.617081891097433	-0.083517223949229	-4.2385638378403	16.2982199480401	0.000602836298852721	0.0120744363253176	-0.125226087455758	-0.0418083604426996	0.0197041326129428
chr1:177008911	ASTN1	+	0.573513801691311	0.65635839876854	-0.0828445970772292	-4.91111395836408	8.95021847639558	0.000848423242946776	0.014792743817468	-0.121036851369	-0.0446523427854581	0.0168687995798056
chr1:177154785	ASTN1	+	0.60234790823142	0.696233450645215	-0.093885542413795	-4.78191341102575	7.34256864933693	0.00175988844954082	0.0229278083948772	-0.139875816403996	-0.0478952684235935	0.0196334676820624
chr1:177564990	AL136114.1	+	0.419499244678102	0.532532282532282	-0.113033037854181	-4.0336703868529	17.6088694407013	0.000809819840421712	0.0143867475853665	-0.171999744952799	-0.0540663307555627	0.0280223783833686
chr1:177827989	AL136114.1	-	0.576776610123797	0.676311986456914	-0.0995353763331173	-5.63167951309821	9.67532978561996	0.000246149117258149	0.00707385486505066	-0.139095787653002	-0.0599749650132326	0.0176741904615873
chr1:178116238	RASAL2	-	0.640462996134784	0.726525054466231	-0.0860620583314466	-4.4172953929654	5.94551883852781	0.00458305582114158	0.0410079795690054	-0.13384127576868	-0.0382828408942133	0.0194829755937313
chr1:178249234	RASAL2	-	0.609010412582687	0.690978622631848	-0.0819682100491618	-7.41612960594931	16.6092371824325	1.16280237335517e-06	0.000320138139961949	-0.105329218046991	-0.0586072020513322	0.0110526938449681
chr1:178414839	RASAL2	-	0.640655386728768	0.728623721178653	-0.0879683344498853	-6.15567029308617	10.5208438695922	8.65764374458764e-05	0.00383247653593831	-0.119597433324427	-0.0563392355753435	0.0142906182854998
chr1:178518451	TEX35	+	0.566265711946026	0.670426065162907	-0.104160353216881	-4.58308211920316	10.0049595689694	0.00100457109507586	0.0163449626106679	-0.154796176528299	-0.0535245299054637	0.0227271409299974
chr1:178838857	RALGPS2	+	0.658312475534559	0.744635076252723	-0.0863226007181644	-5.37870925619196	11.4139164764289	0.000197004424657228	0.00620068768424118	-0.121490426798288	-0.0511547746380412	0.0160489434558654
chr1:179471926	AXDND1	-	0.594579636170842	0.677496055893622	-0.0829164197227802	-5.90187581390027	10.181269722305	0.000140256384219767	0.00507980360719167	-0.114144525636985	-0.0516883138085754	0.0140491637468028
chr1:179570757	NPHS2	-	0.6397221639025	0.742335562987737	-0.102613399085237	-7.58061273679292	8.52614803947697	4.56237265413393e-05	0.0026409924756356	-0.133496013598015	-0.0717307845724596	0.013536293522448
chr1:179655371	TDRD5	-	0.601223996400314	0.7017982877116	-0.100574291311287	-6.4776561939881	14.4402037684053	1.25304459676182e-05	0.00123305966602672	-0.133779991259682	-0.0673685913628911	0.0155263398209725
chr1:179677032	TDRD5	-	0.590378668950097	0.727493386243386	-0.137114717293289	-7.02820853103905	16.5980907342006	2.32222825777506e-06	0.000474832088286034	-0.178351582862159	-0.0958778517244188	0.01950919877914
chr1:180394850	ACBD6	+	0.518522562940673	0.598825528495151	-0.0803029655544775	-5.38973817307925	12.0299381397807	0.000161364545925006	0.00551466489137294	-0.112756648012008	-0.0478492830969474	0.0148992331307624
chr1:182506327	RGSL1	-	0.655205892449741	0.763054432636346	-0.107848540186605	-7.37962818031478	15.6994778170811	1.74341094770928e-06	0.000404373718138931	-0.138877866936423	-0.0768192134367876	0.0146143596332254
chr1:18359674	IGSF21	+	0.588374198796627	0.471488009064958	0.116886189731668	3.65197246133964	13.3509687232257	0.00280931240806732	0.030417659645059	0.0479250646204462	0.18584731484289	0.0320063173994448
chr1:185983048	HMCN1	-	0.588591649394392	0.678869862208804	-0.0902782128144126	-6.22740977140974	12.1633076934487	4.14478250471248e-05	0.00248953319944909	-0.12181730051737	-0.0587391251114552	0.0144969122200506
chr1:186073170	HMCN1	+	0.566273236383254	0.809576534576535	-0.24330329819328	-6.78721819955513	14.6016662699674	7.0492572053499e-06	0.000892487755255008	-0.319891906862902	-0.166714689523659	0.0358472780806174
chr1:186126625	HMCN1	+	0.626344624459732	0.732059860870836	-0.105715236411104	-9.6007607959326	8.03738666235703	1.1133963355931e-05	0.00115860702443037	-0.131086406125353	-0.0803440666968557	0.0110111311653438
chr1:187083969	ERVMER61-1	-	0.573359931630608	0.664082116713696	-0.0907221850830874	-3.94674871051199	11.153148880857	0.00222607790783861	0.0263720511810637	-0.141230636864578	-0.0402137333015964	0.0229865622915016
chr1:187085408	ERVMER61-1	-	0.480034284032999	0.593957431457431	-0.113923147424432	-4.95974162471547	7.94867652891448	0.00112849432620237	0.0175089070771726	-0.166950667692002	-0.060895627156863	0.0229695730230641
chr1:187398461	ERVMER61-1	+	0.593495716284305	0.679206509088279	-0.0857107928039733	-4.37214354964023	8.33124345705126	0.0021542294217314	0.0258639116261453	-0.130606369115309	-0.0408152164926374	0.0196038377584895
chr1:187493685	ERVMER61-1	-	0.607119585497756	0.712931191615402	-0.105811606117646	-6.83617296011433	15.0403789350878	5.55685252106223e-06	0.000777997942202331	-0.138794881478098	-0.0728283307571943	0.0154781932427696
chr1:188907017	LINC01035	-	0.509460063870719	0.603393333996782	-0.0939332701260638	-5.61534257293082	8.12029390553794	0.000475150552595083	0.0104926717950358	-0.132408791371653	-0.0554577488804742	0.016727967867691
chr1:190102761	BRINP3	+	0.548075159141076	0.629122899159664	-0.0810477400185882	-4.50258775025427	6.12488587775831	0.003889543700338	0.0371102270070581	-0.124876001645046	-0.0372194783921305	0.0180002577437855
chr1:190141705	BRINP3	-	0.57964145535103	0.663938371569951	-0.0842969162189207	-4.28406294216	9.68016149168455	0.00172441567629815	0.0226446088349241	-0.128336847519139	-0.0402569849187021	0.0196768622116506
chr1:190223737	BRINP3	+	0.577311215639861	0.733177914371628	-0.155866698731767	-9.067569423373	17.9994526467533	3.94060875233724e-08	5.68636289765949e-05	-0.191980510625639	-0.119752886837894	0.0171894684732159
chr1:190224376	BRINP3	+	0.557190267213964	0.643011827419623	-0.0858215602056599	-6.18162010844443	10.8605824082223	7.2841640085756e-05	0.00346218582122541	-0.116426521495987	-0.0552165989153332	0.0138833442851693
chr1:190232593	BRINP3	+	0.643247072736675	0.826001827549815	-0.18275475481314	-8.04882432325056	17.8649128422913	2.36986892351872e-07	0.000140055482231753	-0.230483676421562	-0.135025833204718	0.0227057701191487
chr1:190258484	BRINP3	+	0.514291486064664	0.632560936629184	-0.11826945056452	-3.95851326902122	14.4471250719473	0.00134896747174328	0.0194732405980054	-0.182164196567148	-0.0543747045618909	0.0298772398946039
chr1:190269170	BRINP3	+	0.436952383355185	0.518348367306701	-0.0813959839515159	-5.19725404920393	16.8406371771346	7.48771308411803e-05	0.00352450965386674	-0.11446236661224	-0.0483296012907917	0.0156613440830323
chr1:190269170	AL354771.1	+	0.436952383355185	0.518348367306701	-0.0813959839515159	-5.19725404920393	16.8406371771346	7.48771308411803e-05	0.00352450965386674	-0.11446236661224	-0.0483296012907917	0.0156613440830323
chr1:190354667	BRINP3	-	0.479158292687704	0.577879338870051	-0.0987210461823465	-4.74473651598589	10.8498873456566	0.000628104118184516	0.0123712457275479	-0.144593118598176	-0.052848973766517	0.0208064337924218
chr1:190354667	AL354771.1	-	0.479158292687704	0.577879338870051	-0.0987210461823465	-4.74473651598589	10.8498873456566	0.000628104118184516	0.0123712457275479	-0.144593118598176	-0.052848973766517	0.0208064337924218
chr1:190410524	BRINP3	+	0.552508471002837	0.640856203346937	-0.0883477323441004	-9.77856243651712	15.3185048562148	5.55441497901848e-08	6.72279522078852e-05	-0.107570219594391	-0.0691252450938102	0.00903483849672771
chr1:190723630	LINC01720	-	0.570450155546688	0.655625476735317	-0.0851753211886281	-3.54810495190323	9.53482380048333	0.00569209963746836	0.0467205530241297	-0.139019555851662	-0.0313310865255942	0.0240058629446515
chr1:190742557	LINC01720	+	0.537661350512051	0.651256176314226	-0.113594825802174	-5.0603302649786	11.5596222384247	0.000313953159680961	0.00818322760902316	-0.162712503234776	-0.0644771483695733	0.0224481051342317
chr1:191030082	AL138927.1	+	0.57233361876219	0.654990405850621	-0.0826567870884307	-6.3577342976346	17.0085693237339	7.12991722806853e-06	0.000898735152873752	-0.110085408053741	-0.0552281661231202	0.0130009816734844
chr1:191123593	AL138927.1	-	0.604922232020909	0.694127367496252	-0.0892051354753434	-7.90796118740934	14.2921297077485	1.36752069842383e-06	0.000351025997829138	-0.113352921004297	-0.0650573499463899	0.0112804215095759
chr1:192423059	AL390957.1	+	0.611447957539384	0.695913617733793	-0.0844656601944089	-5.11242945222088	8.89649992806982	0.000657806856460154	0.0127184223245907	-0.121906565709964	-0.047024754678854	0.0165216285102411
chr1:1933776	CFAP74	-	0.640226314884928	0.724872328764317	-0.0846460138793883	-6.6615362859252	9.23421737877662	8.20403679503682e-05	0.00371708742891902	-0.113279767970393	-0.056012259788384	0.0127066805983227
chr1:193872307	AL136456.1	+	0.434845979950658	0.257360890497907	0.177485089452751	3.5588328148497	12.475327244638	0.00371314123113419	0.0360813915836701	0.0692813696661813	0.285688809239321	0.0498717131954531
chr1:193977155	AL136456.1	-	0.597160659135449	0.698241518829754	-0.101080859694305	-5.54781257231288	12.4646780571602	0.000109853577882635	0.00440688022646707	-0.140615200024606	-0.0615465193640046	0.0182199485611253
chr1:194884801	AL353072.2	+	0.605136070573548	0.712675784607644	-0.107539714034096	-15.7003464157462	16.5175386432326	2.35258286937213e-11	9.76508713546708e-07	-0.122023142953816	-0.0930562851143754	0.00684951218186131
chr1:196656749	CFH	-	0.51997282305553	0.605374829512761	-0.0854020064572307	-3.53085828004672	10.1428628770726	0.0053221898756715	0.0448608188845423	-0.139192003043443	-0.0316120098710189	0.0241873220853545
chr1:196662999	CFH	-	0.664694510794135	0.753861236802413	-0.0891667260082784	-6.38827630941715	14.9775271212317	1.22763163082121e-05	0.00121775820762629	-0.11892110864202	-0.0594123433745362	0.01395786933587
chr1:196901333	CFHR4	+	0.577605428607257	0.6584051214486	-0.0807996928413425	-4.62360652626137	10.5124824347899	0.00082895026035309	0.0145822131718957	-0.119481691713393	-0.0421176939692921	0.0174754690699593
chr1:196989206	CFHR5	-	0.628898711714607	0.714512588661195	-0.0856138769465885	-5.68882626559359	6.74948093097037	0.000846123718657292	0.0147632290740997	-0.121469761614428	-0.0497579922787495	0.01504947997171
chr1:197365797	CRB1	-	0.591379838648746	0.687936507936508	-0.0965566692877617	-5.48830306863137	6.48687716402753	0.00118438280892147	0.0180225107988455	-0.138834393172588	-0.0542789454029355	0.0175931737151389
chr1:197433641	CRB1	+	0.590890816764711	0.688276104552341	-0.0973852877876308	-5.2381134345349	8.04390945892151	0.000771379313911455	0.0139793061142849	-0.140217058976849	-0.0545535165984123	0.0185916721744835
chr1:199250176	LINC02789	+	0.648603355198518	0.74227197632644	-0.0936686211279218	-6.25409334448795	13.9751902791867	2.12925163500805e-05	0.00168382211976791	-0.12579680748075	-0.0615404347750942	0.014977170305665
chr1:199340060	LINC02789	+	0.605547987744765	0.68676737335481	-0.0812193856100442	-8.72795192715035	17.6772234976787	8.01797884132941e-08	7.9999947029812e-05	-0.10079547927241	-0.0616432919476785	0.0093056637213356
chr1:200276546	LINC00862	-	0.670590695149975	0.756355128344376	-0.0857644331944003	-7.78870311350561	17.9934521814001	3.58912538360128e-07	0.000174543138750143	-0.108899104707339	-0.0626297616814618	0.0110113881533994
chr1:200597339	KIF14	+	0.62828411706563	0.753805104089322	-0.125520987023692	-3.88214855496968	10.2770831150028	0.00289651270666318	0.0310018700490402	-0.197300684590581	-0.0537412894568024	0.0323328654857908
chr1:202375358	PPP1R12B	-	0.411348820248891	0.50449044011544	-0.0931416198665489	-4.55818445230144	7.44520104714933	0.00222979271122418	0.0264032047889763	-0.140880594146605	-0.0454026455864925	0.0204339295263757
chr1:202771301	KDM5B	-	0.576206117898664	0.799807422969188	-0.223601305070523	-6.23954424955372	15.0022101639989	1.58339142085326e-05	0.00141580331205641	-0.299983291595768	-0.147219318545278	0.0358361598423661
chr1:20373300	LINC01141	+	0.414987931051187	0.3046918767507	0.110296054300487	5.0957849106567	6.53079629452955	0.00173323573413086	0.0227181005130831	0.0583598520630723	0.162232256537901	0.0216445662904309
chr1:204959305	NFASC	-	0.46437313055513	0.564909969257795	-0.100536838702666	-9.05392854044931	9.75849065553299	4.65666216048195e-06	0.000700469793990979	-0.125361840079682	-0.0757118373256488	0.0111042226867053
chr1:206914091	FCMR	-	0.406373957512643	0.565	-0.158626042487356	-5.21201343069733	12.8121961406541	0.000175692407382791	0.00579375230785848	-0.224474310663137	-0.0927777743115762	0.0304346956500712
chr1:207276431	AL596218.1	-	0.615901309833968	0.708011921458626	-0.0921106116246579	-5.33988143069093	9.35224141793276	0.000411740370609291	0.0096310013065564	-0.1309089420582	-0.0533122811911161	0.0172495612159575
chr1:207515685	CR1	-	0.649285936166405	0.753288722896566	-0.104002786730161	-6.41182606493488	14.2287455290296	1.50251439687266e-05	0.00137263949564635	-0.138739822613463	-0.0692657508468594	0.0162204628879336
chr1:208730416	LINC01717	+	0.565682892014735	0.667913956309898	-0.102231064295163	-8.33929143729168	8.97492262787922	1.61357790090673e-05	0.00143051563492957	-0.129974581253134	-0.0744875473371926	0.0122589628943781
chr1:209955285	SYT14	-	0.612988737298272	0.699290262877219	-0.0863015255789471	-5.36167544188145	12.6612421103824	0.000141660704016267	0.00511282036103108	-0.121169631352068	-0.0514334198058257	0.0160959995647673
chr1:209987947	SYT14	-	0.435502376472189	0.573641250291111	-0.138138873818922	-4.85867864290806	12.5767896287511	0.000343152167021015	0.00863476243827483	-0.199771873240899	-0.0765058743969457	0.0284313666269235
chr1:209987947	AL022397.1	-	0.435502376472189	0.573641250291111	-0.138138873818922	-4.85867864290806	12.5767896287511	0.000343152167021015	0.00863476243827483	-0.199771873240899	-0.0765058743969457	0.0284313666269235
chr1:210888438	AL590132.1	+	0.511077840227	0.600004168799541	-0.0889263285725409	-4.15762250223345	7.35069799177694	0.00382217202456209	0.0367200127743742	-0.139017608114232	-0.0388350490308498	0.0213887452563984
chr1:210888438	KCNH1	+	0.511077840227	0.600004168799541	-0.0889263285725409	-4.15762250223345	7.35069799177694	0.00382217202456209	0.0367200127743742	-0.139017608114232	-0.0388350490308498	0.0213887452563984
chr1:210985120	AL590132.1	-	0.704191637636102	0.889138955443303	-0.184947317807201	-7.21427504491322	17.4351488205192	1.2478052733974e-06	0.000333300233657895	-0.238932532286096	-0.130962103328306	0.0256362997883768
chr1:210985120	KCNH1	-	0.704191637636102	0.889138955443303	-0.184947317807201	-7.21427504491322	17.4351488205192	1.2478052733974e-06	0.000333300233657895	-0.238932532286096	-0.130962103328306	0.0256362997883768
chr1:211005031	AL590132.1	+	0.616079811168869	0.768340434165145	-0.152260622996276	-5.80821681261637	15.2297624464361	3.24610831934644e-05	0.00215917363767511	-0.208062589755984	-0.0964586562365693	0.0262146934090928
chr1:211005031	KCNH1	+	0.616079811168869	0.768340434165145	-0.152260622996276	-5.80821681261637	15.2297624464361	3.24610831934644e-05	0.00215917363767511	-0.208062589755984	-0.0964586562365693	0.0262146934090928
chr1:211005352	KCNH1	+	0.512945018587145	0.607497149057251	-0.0945521304701064	-4.87927225355815	9.09418613442077	0.0008463541660164	0.0147647338020499	-0.138319841184692	-0.0507844197555207	0.019378326429962
chr1:211005352	AL590132.1	+	0.512945018587145	0.607497149057251	-0.0945521304701064	-4.87927225355815	9.09418613442077	0.0008463541660164	0.0147647338020499	-0.138319841184692	-0.0507844197555207	0.019378326429962
chr1:211057433	KCNH1	+	0.517215030166158	0.627747063737776	-0.110532033571618	-6.32972987640723	8.28465666235447	0.000194360376904496	0.00615551213868824	-0.150560744881657	-0.0705033222615788	0.0174623618590113
chr1:211057433	AL590132.1	+	0.517215030166158	0.627747063737776	-0.110532033571618	-6.32972987640723	8.28465666235447	0.000194360376904496	0.00615551213868824	-0.150560744881657	-0.0705033222615788	0.0174623618590113
chr1:211388160	LINC00467	+	0.650628680325885	0.831757054673721	-0.181128374347836	-7.25239360608822	17.5620095147228	1.11434219566665e-06	0.000312827271731666	-0.233692814028668	-0.128563934667004	0.0249749784947942
chr1:211849269	LPGAT1-AS1	-	0.658950506095767	0.748528493985487	-0.0895779878897198	-6.26354039238749	14.1595009690371	1.97455131333793e-05	0.00160968551037212	-0.12021925836722	-0.0589367174122201	0.0143014944069955
chr1:213503241	AL592402.1	-	0.51132026335255	0.603402603731551	-0.0920823403790011	-6.26345588258603	10.1153855099091	8.88413647968485e-05	0.00389231196128301	-0.124788796734885	-0.0593758840231173	0.0147015229459846
chr1:213905273	PROX1-AS1	+	0.595578181037798	0.675873264666368	-0.0802950836285703	-4.61620818504265	12.053442864206	0.000587267122817271	0.0118825866694649	-0.11817508362313	-0.0424150836340109	0.0173941643032351
chr1:214144023	LINC02775	+	0.661011804442005	0.762375782112624	-0.10136397767062	-6.9343119594067	10.2660392424877	3.52207415800892e-05	0.00226905760840557	-0.133820287526198	-0.0689076678150409	0.0146177412069145
chr1:214160527	LINC02775	+	0.586135675960974	0.678451178451178	-0.0923155024902039	-4.16355938269449	8.13435622315979	0.00303688714347717	0.0319012394600219	-0.143298189505524	-0.0413328154748834	0.0221722555162552
chr1:214182090	LINC02775	+	0.593503160373461	0.706543505227716	-0.113040344854255	-3.63598608780643	15.4261123551501	0.00234234944822421	0.027202826742885	-0.179146597911836	-0.0469340917966731	0.0310893227103769
chr1:214497228	PTPN14	+	0.621333524190155	0.70718201754386	-0.0858484933537043	-4.81015517267181	9.83166710121039	0.000747735744743113	0.0137160370240669	-0.125707336611042	-0.0459896500963662	0.0178473438531547
chr1:214641707	CENPF	+	0.587718764943004	0.497970513963161	0.089748250979843	4.77656208102776	9.16030889701226	0.000957702326426607	0.0158870696360354	0.0473570228988917	0.132139479060794	0.0187892985493307
chr1:215058548	KCNK2	-	0.567831845881045	0.666324757973365	-0.0984929120923198	-4.40680348272245	7.14692971839387	0.00297762344368223	0.0315218826851457	-0.151123263060654	-0.0458625611239853	0.0223501938487787
chr1:215677582	USH2A	-	0.637421030654113	0.767100709274622	-0.129679678620509	-9.14584732612516	16.9663346437022	5.73152984513244e-08	6.80870044153204e-05	-0.159599439737282	-0.0997599175037356	0.01417907756344
chr1:216062207	USH2A	+	0.479176056387467	0.565738795518207	-0.08656273913074	-3.85978906917633	7.55547891766001	0.00536573883694071	0.0450751395443053	-0.138813485078417	-0.0343119931830629	0.0224268056050048
chr1:216067484	USH2A	+	0.610529124583963	0.699721784133029	-0.0891926595490662	-5.60823936038086	8.30236196557106	0.000442570684568514	0.0100491295896614	-0.125635839034813	-0.0527494800633194	0.0159038610547124
chr1:216079986	AC093581.1	+	0.548387849496319	0.650979907773386	-0.102592058277067	-4.01864384736728	9.42196471646544	0.0027556137803803	0.0300582416377952	-0.159950862856312	-0.0452332536978214	0.025529024759006
chr1:216079986	USH2A	+	0.548387849496319	0.650979907773386	-0.102592058277067	-4.01864384736728	9.42196471646544	0.0027556137803803	0.0300582416377952	-0.159950862856312	-0.0452332536978214	0.025529024759006
chr1:216095228	USH2A	-	0.577323406386238	0.670227665852666	-0.092904259466428	-5.66411208266726	13.995563885289	5.85115274280496e-05	0.00304514566127141	-0.128084662239778	-0.0577238566930777	0.0164022636046917
chr1:216129666	USH2A	+	0.600308196812232	0.682600440495177	-0.0822922436829452	-4.91871435515919	17.2124726564224	0.000125481587594795	0.00476364844813003	-0.117557218946536	-0.0470272684193548	0.0167304376186492
chr1:216694588	ESRRG	-	0.595249736565952	0.691847656127842	-0.0965979195618903	-4.86479677516078	7.92978816622004	0.001280063884014	0.0188725241594663	-0.142457795698087	-0.0507380434256933	0.0198565169371742
chr1:21740844	USP48	+	0.523761821462762	0.379697251536877	0.144064569925885	4.23362930249469	9.99222581138742	0.00173681265265937	0.0227451801373241	0.0682360790654525	0.219893060786317	0.0340286216936834
chr1:217766771	SPATA17	-	0.579787415395553	0.668506776470065	-0.0887193610745111	-6.49708709856405	12.1069748656223	2.82732845605779e-05	0.00198785732481738	-0.118442468910535	-0.058996253238487	0.0136552519196055
chr1:217829699	SPATA17	+	0.513174955230274	0.638277933105519	-0.125102977875245	-5.93505966579272	17.2920963693634	1.51941013380021e-05	0.00138188554011213	-0.169517861892437	-0.0806880938580527	0.0210786386186288
chr1:218045050	LINC01653	+	0.570731044227285	0.660275772988621	-0.0895447287613365	-4.01401215055125	7.43376985664621	0.00450412213882492	0.0405955502603073	-0.141677246077882	-0.0374122114447912	0.0223080362995511
chr1:218512593	C1orf143	-	0.638664847681768	0.722368823942248	-0.08370397626048	-5.26567178411344	10.0238107235466	0.000362208914142558	0.00892908039330234	-0.119111433334844	-0.0482965191861156	0.015896162862451
chr1:219098700	LYPLAL1-DT	+	0.623781192114242	0.805155669873778	-0.181374477759536	-6.52956845581249	11.048802304813	4.1643766096965e-05	0.00249790027965249	-0.242479206565974	-0.120269748953098	0.0277774065754805
chr1:219736156	SLC30A10	+	0.607143438919755	0.722769143499694	-0.115625704579939	-6.07555494011919	9.32363551675881	0.000159715746249297	0.00548076742715667	-0.158450770624217	-0.0728006385356611	0.0190312993166136
chr1:219814577	SLC30A10	+	0.529969083176408	0.634675798987393	-0.104706715810985	-8.37750021139256	17.223113915513	1.75797780249184e-07	0.00011872323186714	-0.131050381237631	-0.0783630503843397	0.0124985631953306
chr1:219943865	SLC30A10	+	0.63119474510452	0.799078218243819	-0.1678834731393	-3.51629328012775	14.9559786499613	0.0031298069235815	0.0324908612025574	-0.269674444713123	-0.0660925015654769	0.0477444455751428
chr1:224401907	WDR26	+	0.510317884448209	0.417216887833999	0.0931009966142104	6.70166039736262	17.9993471986394	2.76716178272475e-06	0.000524947840628462	0.06391443199439	0.122287561234031	0.0138922283574455
chr1:225027050	DNAH14	-	0.631381284120333	0.722284973434399	-0.0909036893140659	-7.37196614031047	17.5880266207445	8.86489494847573e-07	0.000276786732166711	-0.116853716954719	-0.0649536616734127	0.0123309965867854
chr1:225216794	DNAH14	-	0.663931128006758	0.753650793650794	-0.0897196656440354	-8.95628285453823	12.7204157881661	7.50527748578499e-07	0.000252189832318185	-0.11140963543274	-0.0680296958553308	0.010017511405256
chr1:225313558	DNAH14	-	0.632586560265132	0.712819416304071	-0.0802328560389394	-4.98355062689841	12.4672583142301	0.000283511446955777	0.00769740668998229	-0.115165476338774	-0.0453002357391046	0.0160995366648605
chr1:227068918	CDC42BPA	+	0.618883502057429	0.705372405372405	-0.0864889033149758	-7.02743107078374	17.9999844242965	1.47415228018675e-06	0.000367696516164573	-0.11234564280497	-0.0606321638249813	0.0123073285876186
chr1:227149901	CDC42BPA	+	0.609237817167107	0.692071045802454	-0.0828332286353469	-3.88618092034319	9.20260464828646	0.00354303243555135	0.035088403670795	-0.130889356035446	-0.0347771012352482	0.0213148153246638
chr1:230751334	CAPN9	+	0.540712893257532	0.631255767330664	-0.090542874073132	-6.57640682762559	11.2315063684752	3.61158397577383e-05	0.00230059729378431	-0.120769639151099	-0.0603161089951646	0.0137678334759929
chr1:230751334	AL512328.1	+	0.540712893257532	0.631255767330664	-0.090542874073132	-6.57640682762559	11.2315063684752	3.61158397577383e-05	0.00230059729378431	-0.120769639151099	-0.0603161089951646	0.0137678334759929
chr1:23098645	LUZP1	+	0.374778085998232	0.526954137480453	-0.152176051482221	-3.85587036917978	11.66551507629	0.00240391708266795	0.0276160463439112	-0.238439483595496	-0.0659126193689466	0.039466070410088
chr1:231509902	AL445524.2	+	0.64222851509277	0.728873506812337	-0.0866449917195666	-7.37318593911815	17.0570766612258	1.06635371734681e-06	0.000305876628186998	-0.11143188418726	-0.0618580992518729	0.0117513639876997
chr1:232031728	DISC1	+	0.596888588350353	0.679696373950945	-0.0828077856005915	-7.39613024081777	9.09282519845179	3.89999688702161e-05	0.00240305126036805	-0.108095756245492	-0.0575198149556908	0.0111960961887328
chr1:232496030	SIPA1L2	+	0.601525553012967	0.682882819794585	-0.0813572667816174	-5.0680704058225	9.0668600295232	0.00065841389551819	0.0127256262610309	-0.117630688099141	-0.0450838454640938	0.0160529077670565
chr1:233926238	SLC35F3	-	0.638616296414284	0.737075170242139	-0.0984588738278553	-5.31013517429801	9.69120402457682	0.000380552363073658	0.00918934592832389	-0.13995146318293	-0.0569662844727811	0.0185416887887174
chr1:233979148	SLC35F3	+	0.565797966033331	0.663717036594796	-0.0979190705614648	-5.87167709562263	14.5197076460997	3.50431760340312e-05	0.00226340425819438	-0.13356688805622	-0.0622712530667099	0.016676508085648
chr1:234013812	SLC35F3	+	0.618145927902964	0.704690835983939	-0.0865449080809753	-6.69015489814451	17.4585945329583	3.31289635138009e-06	0.000578208166437321	-0.113783307980011	-0.0593065081819396	0.0129361590872848
chr1:235817267	LYST	+	0.533783224821723	0.627060381139328	-0.0932771563176059	-6.92101686198117	7.88491965156652	0.000130585226121165	0.00486564082976071	-0.124435176174038	-0.0621191364611739	0.0134773774111143
chr1:235837998	LYST	+	0.585865884655378	0.687391821023535	-0.101525936368157	-6.45341021871473	13.1298016466072	2.05564685719138e-05	0.00165035168512233	-0.135479029223133	-0.0675728435131812	0.0157321374168551
chr1:237351129	RYR2	+	0.567920360558326	0.664004139135718	-0.0960837785773919	-4.7374706460492	8.59726182175634	0.00120531642907397	0.0182140330723723	-0.14229380885399	-0.0498737483007935	0.020281662042069
chr1:237697625	RYR2	-	0.612702478785571	0.700424047235641	-0.0877215684500707	-4.6090954940499	7.44934015228452	0.00209012481995076	0.0253818856131956	-0.132181244601835	-0.0432618922983065	0.0190322740249827
chr1:237923303	AL359924.1	-	0.583624786133536	0.705758377425044	-0.122133591291508	-7.08121434937161	16.1316943863427	2.4816254222213e-06	0.000494994042879295	-0.158672517594147	-0.0855946649888702	0.0172475489747527
chr1:238283233	AL356010.2	-	0.544543345632527	0.630369699592856	-0.0858263539603293	-5.18995056765026	11.991148830703	0.000226144419581987	0.00673427656616034	-0.121860391065318	-0.0497923168553404	0.0165370272494112
chr1:238283322	AL356010.2	-	0.557299176791883	0.642916986209565	-0.085617809417682	-4.40404967290744	17.8672580267742	0.000347911860444804	0.00870593941788607	-0.12648296623359	-0.0447526526017745	0.019440700213801
chr1:238365849	AL356010.2	-	0.639535925706315	0.734330869508888	-0.0947949438025731	-4.52329411156554	9.76973837829967	0.00116963777949736	0.0178880633419801	-0.141639791472493	-0.0479500961326536	0.020957059493477
chr1:238367704	AL356010.2	-	0.574756808317733	0.676298887039734	-0.101542078722001	-4.42537760933498	15.6023939359265	0.000449147788993703	0.0101442625784894	-0.150285101639235	-0.0527990558047672	0.0229454043668061
chr1:238403522	AL356010.2	-	0.634718806667162	0.722775263951735	-0.0880564572845729	-3.8009834575301	8.4180299277536	0.0047599249949356	0.0419767502818394	-0.141020822328646	-0.0350920922405	0.0231667562536019
chr1:238479272	LINC01139	-	0.665799086779848	0.75705467372134	-0.0912555869414928	-5.17709086417545	15.3178030619401	0.000105319110942513	0.00430408465841624	-0.128758461521458	-0.053752712361528	0.0176268080541073
chr1:23883139	CNR2	+	0.581571347221992	0.45492932992933	0.126642017292662	5.01868925443281	14.8795791350477	0.000156468772256778	0.00541558832487103	0.0728189073556373	0.180465127229687	0.0252340822219276
chr1:23910646	CNR2	+	0.472943844327458	0.561654749866325	-0.088710905538867	-5.75063863938277	8.70390115925721	0.000313098838749452	0.0081716085291784	-0.123789358529603	-0.0536324525481309	0.0154262702113358
chr1:239455704	CHRM3	+	0.643331479377483	0.767180236917079	-0.123848757539596	-8.90222146933517	16.4421540044689	1.0841784479698e-07	9.47997842792032e-05	-0.153276804910372	-0.0944207101688202	0.0139121182242218
chr1:239482172	CHRM3	-	0.595230713235327	0.7072977582846	-0.112067045049273	-7.11557617037481	13.3010599112406	6.92993048763298e-06	0.00088318948982127	-0.14601373542901	-0.0781203546695359	0.0157495390908548
chr1:239634326	CHRM3	+	0.614474572441625	0.705884350665688	-0.0914097782240639	-9.45639334392913	17.1906550890349	3.16169564165393e-08	5.15243211108192e-05	-0.111786994081359	-0.0710325623667693	0.00966645262094006
chr1:240323603	FMN2	-	0.564278473627213	0.650076371128161	-0.0857978975009484	-3.85168697637152	8.57315616316776	0.00426874705300016	0.0392706586019291	-0.136573415784795	-0.0350223792171015	0.0222754076401541
chr1:240380602	FMN2	+	0.559000930759098	0.654579243659703	-0.0955783129006057	-5.61865898611217	14.2254937416945	5.96572270252259e-05	0.00307656023493619	-0.132008831361848	-0.0591477944393629	0.0170108762850441
chr1:240548675	GREM2	+	0.602667124388708	0.686427516913198	-0.0837603925244903	-5.2564333608258	9.01640516157055	0.000520093442999386	0.0110407616950609	-0.11979749587229	-0.0477232891766901	0.0159348339025326
chr1:241032707	RGS7	-	0.526465430164375	0.331928741820158	0.194536688344216	4.14654408495709	8.92199121796699	0.0025446290854253	0.0286029588488289	0.0882651076038693	0.300808269084563	0.0469153792552116
chr1:242150638	PLD5	-	0.644162411361952	0.756128694639817	-0.111966283277865	-6.03295292891967	17.7577354385737	1.11605895196227e-05	0.00116006444936265	-0.150995707412703	-0.072936859143027	0.0185591176654373
chr1:242150638	AL591686.2	-	0.644162411361952	0.756128694639817	-0.111966283277865	-6.03295292891967	17.7577354385737	1.11605895196227e-05	0.00116006444936265	-0.150995707412703	-0.072936859143027	0.0185591176654373
chr1:242191605	AL591686.2	+	0.482434109013743	0.569760466426268	-0.0873263574125255	-6.85721064111029	8.60865092023489	9.18406272680787e-05	0.00397095349401414	-0.11633573237208	-0.0583169824529714	0.0127349679021069
chr1:242191605	PLD5	+	0.482434109013743	0.569760466426268	-0.0873263574125255	-6.85721064111029	8.60865092023489	9.18406272680787e-05	0.00397095349401414	-0.11633573237208	-0.0583169824529714	0.0127349679021069
chr1:243041452	SEPTIN14P21	-	0.501924550530541	0.582864858906526	-0.0809403083759843	-3.84696194251887	8.81367180335493	0.00408118677542092	0.0382249330396493	-0.128690055430665	-0.0331905613213037	0.0210400595548879
chr1:243971970	LINC02774	-	0.616394515544462	0.699702608470437	-0.0833080929259752	-7.55681316477689	16.3333392913572	1.01207860535206e-06	0.00029687451281104	-0.106639726093709	-0.0599764597582415	0.0110242361574166
chr1:245261271	KIF26B	-	0.623342741458505	0.722504439171106	-0.0991616977126009	-5.96171156862596	10.0888748140875	0.000134149365879692	0.00494775704539601	-0.136178330799359	-0.062145064625843	0.0166330921197946
chr1:245439466	KIF26B	+	0.565269722547399	0.651906068069861	-0.0866363455224617	-3.88715950827382	7.85488054676091	0.00479449104857937	0.0421525129711476	-0.138197921318647	-0.0350747697262767	0.0222878287700971
chr1:247012746	ZNF670-ZNF695	-	0.658438212114683	0.786616720053253	-0.12817850793857	-8.49278459873255	11.9779629044058	2.05448928600172e-06	0.000443339311109426	-0.161069248517497	-0.0952877673596428	0.0150926361605473
chr1:248056220	OR2L3	-	0.564038788438943	0.669729535170712	-0.105690746731768	-3.84026951521649	7.45064920078	0.00565871833473199	0.0465443088522842	-0.169979717149907	-0.04140177631363	0.027521700316341
chr1:248720147	CR589904.2	+	0.512062137039294	0.606249190219705	-0.0941870531804108	-4.63855518658475	8.72351017680376	0.00132717270762355	0.0192855562296462	-0.140343620142868	-0.0480304862179535	0.0203052565705828
chr1:24922301	RUNX3	-	0.624593400542649	0.707912087912088	-0.0833186873694393	-6.63485535035051	16.8282122051346	4.44021806801806e-06	0.000682238653323312	-0.109833788634014	-0.0568035861048647	0.0125577247686399
chr1:2626867	MMEL1	+	0.492708226749529	0.587951735365528	-0.0952435086159997	-4.38296982994081	12.1945310071843	0.000858833338142423	0.0148936559980371	-0.142506261416707	-0.0479807558152928	0.0217303591654624
chr1:26308389	UBXN11	+	0.37689018927409	0.279343434343434	0.0975467549306558	4.23645647824851	8.21318085939109	0.0026865959558337	0.0295845339159753	0.0446886709996092	0.150404838861703	0.0230255534150996
chr1:2654628	TTC34	+	0.605153931281751	0.514533193433449	0.0906207378483017	3.69109663310994	11.6617245452857	0.00323182897639482	0.0331519812725633	0.0369557329186896	0.144285742777914	0.0245511691662077
chr1:2695904	TTC34	+	0.573354040725482	0.65369166741118	-0.0803376266856973	-4.23273060617314	11.4095384160453	0.00129753908002711	0.0190249080662323	-0.121930312874154	-0.0387449404972402	0.0189800944497934
chr1:29348559	LINC01756	-	0.615207102863779	0.703225465954371	-0.0880183630905914	-4.02638127429326	14.5756797979629	0.00115886182991086	0.0177915823613026	-0.134731153307241	-0.0413055728739417	0.0218604143756955
chr1:32680200	RBBP4	-	0.544300834368835	0.438452982202982	0.105847852165853	4.89600934218342	12.609291961286	0.000319119869072748	0.00826720569840475	0.0589948494445799	0.152700854887126	0.0216192095986993
chr1:32680200	SYNC	-	0.544300834368835	0.438452982202982	0.105847852165853	4.89600934218342	12.609291961286	0.000319119869072748	0.00826720569840475	0.0589948494445799	0.152700854887126	0.0216192095986993
chr1:33682896	CSMD2	-	0.564897797377897	0.666753671165436	-0.101855873787539	-6.6651299090377	9.53710112401129	7.01765795861195e-05	0.00338455646715441	-0.136131431126716	-0.0675803164483617	0.015281903755458
chr1:35050587	ZMYM1	-	0.633711640378131	0.718919374861404	-0.085207734483273	-5.50365236909396	9.06147889915388	0.000369418406988565	0.00903488692691585	-0.120194341309191	-0.0502211276573554	0.0154820342508843
chr1:35069360	ZMYM1	-	0.626695108041136	0.754809036964012	-0.128113928922876	-6.34992903998933	11.3168753981348	4.78774046307808e-05	0.00271640849213162	-0.172368998470338	-0.0838588593754144	0.0201756473365396
chr1:35073104	ZMYM1	+	0.644604294709337	0.728750416250416	-0.0841461215410795	-5.79765340492512	12.2763829594113	7.77399979339378e-05	0.00359947922848518	-0.115690247201338	-0.0526019958808205	0.014513824070545
chr1:36899254	GRIK3	+	0.622298844366922	0.720994637171108	-0.0986957928041856	-5.51615623773114	11.2531161815406	0.000167454070882526	0.00563890786066946	-0.137968307163472	-0.0594232784448991	0.0178921315043789
chr1:37221941	AL353604.1	+	0.591135411432685	0.69092736006485	-0.0997919486321653	-4.45453276943515	7.40282205501235	0.00257514078448686	0.0288162877944342	-0.152186285935797	-0.0473976113285335	0.022402337977372
chr1:37417885	LINC01137	+	0.675541370811045	0.777141519130989	-0.101600148319944	-8.6075570925241	17.9898372826097	8.54719433254428e-08	8.25061487393281e-05	-0.126399592840088	-0.0768007037998004	0.0118035985387987
chr1:39139414	MACF1	-	0.66621030359144	0.74743425798413	-0.0812239543926898	-5.91067255802713	8.1509311546744	0.000332585455471512	0.00847877227759819	-0.112811017227241	-0.0496368915581386	0.01374191407074
chr1:41337005	AC093151.7	-	0.537236725487607	0.627650086231743	-0.0904133607441359	-5.24367256082494	14.9032509616389	0.00010124812357843	0.0042126392177517	-0.127185400580383	-0.0536413209078887	0.017242373488308
chr1:41819590	HIVEP3	-	0.630451918297264	0.72633990896186	-0.095887990664596	-7.87070044224664	15.6274208120645	8.01322747571215e-07	0.000261294536498343	-0.121764727641589	-0.0700112536876027	0.0121829043511692
chr1:42572442	CCDC30	-	0.654626060196025	0.752412518037518	-0.0977864578414928	-5.63102434864609	14.5964169283837	5.29718978561391e-05	0.0028781724142386	-0.134889823628997	-0.0606830920539885	0.0173656606306461
chr1:44070441	AL139220.2	-	0.65996436072362	0.785116914149172	-0.125152553425552	-6.73950901883254	9.20217427423011	7.61763633723591e-05	0.00356136136056581	-0.16702050103258	-0.0832846058185253	0.0185699808511024
chr1:44070528	AL139220.2	-	0.649541823098156	0.744610754712708	-0.095068931614552	-6.39661500015282	17.8980749831336	5.19231515349462e-06	0.000744690915312231	-0.12630638690569	-0.0638314763234139	0.0148623813708158
chr1:45030996	ZSWIM5	-	0.660013323511223	0.757431380109399	-0.097418056598176	-6.58361576724659	15.7454293243747	6.81565021380641e-06	0.000874901853831573	-0.128827658822256	-0.0660084543740965	0.014797044670017
chr1:45250612	ZSWIM5	+	0.475138800279701	0.357528534267665	0.117610266012037	3.38763230562861	12.2819024073795	0.00522890178055201	0.0443664400897753	0.0421593543703586	0.193061177653715	0.0347175417522808
chr1:45684408	GPBP1L1	+	0.415022249291666	0.323855218855219	0.0911670304364476	4.19595323226835	8.9696313241816	0.00233795722417681	0.0271741796389722	0.041990925056423	0.140343135816472	0.0217273704900573
chr1:46096957	AL358075.4	+	0.458647409248515	0.375266597867217	0.0833808113812979	4.82394246829872	9.3943855890706	0.000833764354828038	0.014631153428641	0.0445287072451187	0.122232915517477	0.0172847856145151
chr1:46096957	PIK3R3	+	0.458647409248515	0.375266597867217	0.0833808113812979	4.82394246829872	9.3943855890706	0.000833764354828038	0.014631153428641	0.0445287072451187	0.122232915517477	0.0172847856145151
chr1:47164078	CYP4A22-AS1	+	0.61678417934057	0.719162950339421	-0.102378770998851	-6.64860694185834	14.9800381763328	7.81205948597707e-06	0.000946407290788921	-0.135203769691325	-0.0695537723063759	0.0153985296309658
chr1:48111426	SKINT1L	+	0.547423901127771	0.630469407136074	-0.0830455060083024	-7.84421897190262	17.7923405926136	3.50414145639728e-07	0.000172824475571765	-0.10530625765395	-0.0607847543626549	0.0105868418902844
chr1:48145900	SKINT1L	+	0.544414769036065	0.629737854737855	-0.0853230857017898	-4.26616869129928	14.9994985849913	0.000676378171605685	0.0129252047641493	-0.127952056777549	-0.0426941146260303	0.0199999324630092
chr1:48358640	SPATA6	+	0.61678094619348	0.74707190957191	-0.130290963378429	-8.98431098060626	9.16855550337082	7.64158843754327e-06	0.000933666074492916	-0.163005183639856	-0.0975767431170031	0.0145020540428396
chr1:48430326	SPATA6	+	0.596524386435305	0.677097263636637	-0.0805728772013324	-5.33479854074085	12.2022061298247	0.00016810763448875	0.00565058022495447	-0.113419686448357	-0.0477260679543083	0.015103265209738
chr1:48432319	SPATA6	+	0.536308255690114	0.625193088957973	-0.0888848332678588	-7.65274906348012	14.5092834420192	1.82720465680597e-06	0.000414530369121782	-0.113714229642564	-0.0640554368931538	0.0116147586351718
chr1:49203194	AGBL4	+	0.605516544448864	0.706771285409927	-0.101254740961063	-6.7307153901637	15.7581281237194	5.22446639607413e-06	0.000746990080408703	-0.133185750991346	-0.0693237309307793	0.015043681851269
chr1:49257131	AGBL4	+	0.546712692012772	0.658981244671782	-0.11226855265901	-4.26499011456225	6.01624267933919	0.00525974487337286	0.0445256698120835	-0.176637182555251	-0.0478999227627692	0.0263232855512804
chr1:49651765	AGBL4	+	0.589899045122362	0.680584795321637	-0.0906857501992758	-5.03733436860787	8.88673380984543	0.000730022522110968	0.013512069089432	-0.131490006648378	-0.0498814937501737	0.0180027259584791
chr1:49693520	AGBL4	+	0.634126499329949	0.733220211161388	-0.0990937118314384	-4.61656138023675	8.78002411023859	0.00134526184036168	0.0194395900522437	-0.147836613556362	-0.050350810106515	0.0214648314339875
chr1:49706741	AGBL4	-	0.505122183572826	0.588824631394291	-0.083702447821465	-4.04723194398514	14.741174616859	0.00108813470901556	0.0171458607341386	-0.127851328879482	-0.0395535667634479	0.0206814062005664
chr1:49736125	AGBL4	+	0.562978881524885	0.673274280067758	-0.110295398542873	-7.52866798205169	16.1139743457329	1.15568673025627e-06	0.000319175344776667	-0.141334284180579	-0.0792565129051679	0.0146500548046237
chr1:49762648	AGBL4	-	0.583709123329492	0.667318985362464	-0.0836098620329718	-4.34722916515742	7.29010714450787	0.00305814687120417	0.0320353815901529	-0.128724143755117	-0.0384955803108268	0.0192329087923627
chr1:49805170	AGBL4	+	0.600408376576002	0.686596736596737	-0.086188360020735	-5.44025326934421	16.6330876116772	4.75728381538681e-05	0.00270456490901585	-0.119669813930094	-0.0527069061113765	0.0158427109462726
chr1:49868714	AGBL4	+	0.629705616732014	0.720124611109266	-0.0904189943772515	-4.45988620473551	8.07309538036738	0.00206438397056988	0.0251911178894109	-0.137096962104765	-0.0437410266497381	0.0202738344043946
chr1:51615665	OSBPL9	-	0.527671961406433	0.618735072398865	-0.091063110992432	-3.91780819656214	15.2125886759378	0.00133758409039957	0.0193762242767211	-0.140544974629856	-0.0415812473550081	0.023243381611264
chr1:52255709	ZFYVE9	-	0.64812577827105	0.728225095294988	-0.0800993170239382	-6.1293750105173	10.2084873183345	0.000101998647811846	0.00422723553150793	-0.109136464631859	-0.0510621694160179	0.0130681051308652
chr1:53563834	GLIS1	+	0.389329663181834	0.300829824707118	0.0884998384747164	7.2385139689418	13.9767029665525	4.34111520202805e-06	0.000673854574843626	0.0622730517214266	0.114726625228006	0.0122262440681114
chr1:53563886	GLIS1	+	0.371356397670986	0.277281639928699	0.0940747577422874	9.4714296476136	15.4549069515517	7.85799841630191e-08	7.94163980921985e-05	0.0729583290671134	0.115191186417461	0.00993247706443031
chr1:53563908	GLIS1	+	0.449279032407111	0.330857214680744	0.118421817726367	6.76169291357118	17.015528259137	3.30809530801179e-06	0.000577697893930677	0.0814738475667589	0.155369787885975	0.0175136344167134
chr1:55808247	AL603840.1	+	0.594912411604958	0.791339869281046	-0.196427457676088	-10.3547314799344	16.5930605776302	1.1791675917622e-08	3.12805234441023e-05	-0.23652519404351	-0.156329721308665	0.0189698263114527
chr1:55896523	AL603840.1	-	0.620353685819073	0.723260447045613	-0.10290676122654	-9.23452740124315	17.3347342456749	4.15265849679297e-08	5.75776416607726e-05	-0.126383366986381	-0.0794301554666985	0.01114369547625
chr1:55896523	LINC01755	-	0.620353685819073	0.723260447045613	-0.10290676122654	-9.23452740124315	17.3347342456749	4.15265849679297e-08	5.75776416607726e-05	-0.126383366986381	-0.0794301554666985	0.01114369547625
chr1:55952336	AL603840.1	+	0.634564204284529	0.725803326790169	-0.0912391225056404	-6.75603435095948	15.2492364127693	5.92749826470194e-06	0.000807528898698224	-0.1199830728079	-0.0624951722033803	0.0135048340144515
chr1:56173945	AC119674.1	-	0.620011947712588	0.70121827404797	-0.0812063263353819	-6.6901809460011	17.8803408642946	2.92863162572382e-06	0.000538162754483757	-0.106719842165795	-0.0556928105049685	0.0121381360221536
chr1:56173945	AC119674.2	-	0.620011947712588	0.70121827404797	-0.0812063263353819	-6.6901809460011	17.8803408642946	2.92863162572382e-06	0.000538162754483757	-0.106719842165795	-0.0556928105049685	0.0121381360221536
chr1:56351812	AC119674.1	-	0.612925689393533	0.694128044128044	-0.0812023547345109	-5.61589057195537	10.4476308037377	0.000189490034874748	0.00606343192267562	-0.113233754380327	-0.0491709550886944	0.0144593904909791
chr1:56351812	AC119674.2	-	0.612925689393533	0.694128044128044	-0.0812023547345109	-5.61589057195537	10.4476308037377	0.000189490034874748	0.00606343192267562	-0.113233754380327	-0.0491709550886944	0.0144593904909791
chr1:56352012	AC119674.1	-	0.616365956884533	0.710475086091784	-0.0941091292072516	-8.32536608911228	8.87336999402466	1.75397837871797e-05	0.00150147826430505	-0.119736069159692	-0.0684821892548108	0.0113039028193998
chr1:56352012	AC119674.2	-	0.616365956884533	0.710475086091784	-0.0941091292072516	-8.32536608911228	8.87336999402466	1.75397837871797e-05	0.00150147826430505	-0.119736069159692	-0.0684821892548108	0.0113039028193998
chr1:56590092	PLPP3	+	0.641815529242	0.755764163372859	-0.113948634130859	-7.22520943321563	15.2140306962956	2.71622735336807e-06	0.000519715133259132	-0.147522541485387	-0.0803747267763316	0.0157709800918733
chr1:56757895	FYB2	-	0.604070349462322	0.719723303067334	-0.115652953605012	-9.52089293706314	13.2343058682251	2.73606619454029e-07	0.000152140588588214	-0.141848405944282	-0.089457501265742	0.0121472801311309
chr1:57687852	DAB1	+	0.556291368250481	0.642980698034758	-0.0866893297842768	-7.90363707696315	17.0805333894197	4.16674633361651e-07	0.000186093730127782	-0.109822075880672	-0.0635565836878819	0.0109682832017871
chr1:57922562	DAB1	+	0.586502650358399	0.676244711113428	-0.0897420607550289	-5.83196531223444	10.7053107908544	0.000126724529244256	0.00479085256861884	-0.12372483325986	-0.0557592882501979	0.0153879620248711
chr1:58195273	DAB1	+	0.658327042631554	0.758994550770867	-0.100667508139313	-4.23229134426624	8.69519394698256	0.002376277471505	0.0274302631092514	-0.154763126897511	-0.0465718893811145	0.0237855808947778
chr1:58335167	DAB1	+	0.608323647947708	0.700066206359113	-0.0917425584114044	-7.54919333337592	7.31072937993349	0.000105664493783664	0.0043109259213646	-0.120233210020603	-0.0632519068022063	0.012152630666617
chr1:59252127	AC093425.1	+	0.540700720888691	0.643956698634118	-0.103255977745427	-6.91250259989935	11.961539687965	1.649541502505e-05	0.00144868110768104	-0.135813752657965	-0.0706982028328888	0.0149375680158053
chr1:5955277	NPHP4	+	0.508684040417787	0.603289937186996	-0.0946058967692094	-4.680388775954	9.80642029533514	0.000913855840627285	0.0154599186329993	-0.139764639136787	-0.0494471544016313	0.020213256055834
chr1:60603912	LINC01748	+	0.609533734057817	0.740162037037037	-0.13062830297922	-8.18316691414123	16.6981986808945	3.04518706925195e-07	0.000161627466683161	-0.164353823757408	-0.0969027822010332	0.0159630500452683
chr1:6175711	AL031847.2	+	0.656109009515964	0.748115832216199	-0.092006822700235	-6.17562521190664	17.9164714238073	8.04591362215613e-06	0.000958547739113649	-0.123317624692517	-0.0606960207079528	0.014898381871174
chr1:6175711	CHD5	+	0.656109009515964	0.748115832216199	-0.092006822700235	-6.17562521190664	17.9164714238073	8.04591362215613e-06	0.000958547739113649	-0.123317624692517	-0.0606960207079528	0.014898381871174
chr1:6175715	CHD5	+	0.647769828414809	0.745665868226844	-0.0978960398120349	-8.39126354229568	17.9678836478985	1.25011173863921e-07	0.000101065174258978	-0.122409428165895	-0.0733826514581751	0.0116664241706384
chr1:6175715	AL031847.2	+	0.647769828414809	0.745665868226844	-0.0978960398120349	-8.39126354229568	17.9678836478985	1.25011173863921e-07	0.000101065174258978	-0.122409428165895	-0.0733826514581751	0.0116664241706384
chr1:62200750	L1TD1	-	0.601845761283148	0.691899115377376	-0.0900533540942284	-4.38908794708691	8.47266613645111	0.0020209455514697	0.0248913426927671	-0.136911395847129	-0.0431953123413282	0.0205175551686081
chr1:62260202	KANK4	-	0.684621577948646	0.769881945191543	-0.0852603672428971	-4.22133885152428	14.9332265106142	0.000747149312507775	0.0137102695462481	-0.12832702864501	-0.0421937058407839	0.0201974705755049
chr1:65292388	DNAJC6	-	0.592308505416643	0.673001949317739	-0.0806934439010955	-5.46312116075323	10.1900940961081	0.000258013583858541	0.00727758785010279	-0.113521307243215	-0.0478655805589761	0.0147705755605043
chr1:65292388	AL139294.1	-	0.592308505416643	0.673001949317739	-0.0806934439010955	-5.46312116075323	10.1900940961081	0.000258013583858541	0.00727758785010279	-0.113521307243215	-0.0478655805589761	0.0147705755605043
chr1:65630871	LEPR	-	0.615507552242579	0.700523088023088	-0.0850155357805091	-4.84997040542233	7.90426566273178	0.0013162476642096	0.0191879025004553	-0.125523051718677	-0.0445080198423414	0.0175290834116143
chr1:65854410	PDE4B	-	0.595899236628615	0.683088399647286	-0.0871891630186711	-8.1124208562748	10.1020922196439	9.78124580951425e-06	0.00107457409104727	-0.111103574215959	-0.0632747518213833	0.0107476133898098
chr1:65894579	PDE4B	+	0.570443807507054	0.682223234854814	-0.11177942734776	-5.65255816712346	7.99361824118118	0.000481381642870791	0.0105713847742789	-0.157387033415382	-0.0661718212801374	0.0197750158499729
chr1:65942188	PDE4B	-	0.588350883546477	0.670278637770898	-0.0819277542244207	-6.11692464737643	12.9579330446019	3.73064602072889e-05	0.00234300514209608	-0.110872459272054	-0.052983049176787	0.0133936183535561
chr1:66749519	SGIP1	-	0.59630737030214	0.68112370563351	-0.0848163353313697	-5.05183636869866	16.5718568077956	0.000106109747770909	0.004320777417527	-0.120308310639645	-0.049324360023094	0.016789208743358
chr1:68001785	GNG12-AS1	-	0.646767777286353	0.730757389162562	-0.0839896118762085	-5.8668832955729	11.8031825736919	8.15961385047098e-05	0.0037069978878297	-0.115239024065678	-0.052740199686739	0.0143158824958366
chr1:68503834	DEPDC1-AS1	+	0.664581334133884	0.745663395154275	-0.0810820610203907	-4.33373084135512	8.31940183494937	0.00227936364787264	0.0267605605413992	-0.123939683994848	-0.0382244380459332	0.0187095285767764
chr1:69140845	LINC01707	+	0.528429218114909	0.627105862019655	-0.0986766439047458	-4.62331961723361	10.1913450997075	0.000899772512081717	0.015313907480875	-0.146111607722977	-0.0512416800865143	0.0213432451299548
chr1:69882061	LRRC7	+	0.640361180198256	0.735190434382708	-0.094829254184452	-7.07797848326146	12.307842889063	1.12141866315331e-05	0.00116314496623363	-0.123939753313844	-0.0657187550550598	0.0133977878583145
chr1:69918532	LRRC7	+	0.572987721342984	0.66374269005848	-0.090754968715495	-5.06687544651611	11.2245011388079	0.000340328732365974	0.00859205241728315	-0.130081765200246	-0.0514281722307446	0.0179114268099676
chr1:70100569	LRRC7	-	0.562319119386476	0.655233184689706	-0.0929140653032303	-5.51954459319155	7.54016148837837	0.000688373999559739	0.0130567903970538	-0.132148481246786	-0.0536796493596742	0.0168336470037476
chr1:70169507	LRRC40	+	0.63605146495148	0.725770308123249	-0.0897188431717689	-4.27685610946895	6.8270054221399	0.00388673032869123	0.0370949206125115	-0.139579303961268	-0.03985838238227	0.0209777558270271
chr1:70760480	LINC01788	-	0.52093300385442	0.622004070080344	-0.101071066225924	-6.36718727455933	6.98921979300442	0.000381361489712649	0.00920006888182513	-0.138618232925716	-0.0635238995261323	0.0158737385705243
chr1:70951942	PTGER3	+	0.427148627569637	0.550270088099035	-0.123121460529398	-4.32416630920061	17.8827827546967	0.000414183348164025	0.0096644137455881	-0.182968875808398	-0.063274045250399	0.0284728781747896
chr1:71023802	PTGER3	-	0.66038674050856	0.74989824989825	-0.0895115093896895	-4.96470140971682	11.7639253120143	0.000348220418298692	0.00871171230187245	-0.128882212369125	-0.050140806410254	0.0180295856694421
chr1:71474862	ZRANB2-AS2	+	0.609392325694847	0.689940361361766	-0.0805480356669197	-4.49833256889497	9.82432661692372	0.00119802536095826	0.0181453074888314	-0.120542447680698	-0.0405536236531412	0.017906198448708
chr1:71474862	NEGR1	+	0.609392325694847	0.689940361361766	-0.0805480356669197	-4.49833256889497	9.82432661692372	0.00119802536095826	0.0181453074888314	-0.120542447680698	-0.0405536236531412	0.017906198448708
chr1:71689765	NEGR1	+	0.583706731584618	0.695478995478995	-0.111772263894378	-5.47180219668675	11.4096449180144	0.000170634614955691	0.00570184005892215	-0.156535531665087	-0.0670089961236688	0.0204269562160082
chr1:72464108	AL513166.1	+	0.588485993083677	0.685588204066465	-0.0971022109827883	-5.08164565386839	7.41671787539278	0.00119879179456906	0.0181529528093036	-0.141776851255012	-0.0524275707105648	0.0191084183346923
chr1:72505630	AL513166.1	-	0.512805810583343	0.604647313470843	-0.0918415028875003	-4.09765275139903	8.63127650029491	0.00293478430081054	0.031243101852699	-0.142875779087721	-0.040807226687279	0.0224131981061947
chr1:73314382	LINC01360	+	0.614472653556502	0.70221693922987	-0.0877442856733681	-8.36313527452322	17.9510529923186	1.3216727353695e-07	0.000103624282291384	-0.109791034155727	-0.0656975371910097	0.0104917931843893
chr1:73342302	LINC01360	+	0.530654450108956	0.612627889352027	-0.0819734392430712	-4.30957405170696	9.51543174069241	0.0017251186180071	0.0226512520616388	-0.124649782790164	-0.039297095695978	0.0190212392824768
chr1:73816234	AL591463.1	+	0.663932837581113	0.782804232804233	-0.11887139522312	-5.62265781326663	7.31036429968152	0.000684432004903229	0.0130100369524286	-0.168436037053142	-0.0693067533930983	0.0211414955650767
chr1:74041583	LRRIQ3	-	0.551333446379529	0.642193547766303	-0.0908601013867739	-7.46414353947152	17.6684513599904	7.28193186965881e-07	0.000248266132362945	-0.116468809524888	-0.06525139324866	0.0121728770228348
chr1:74213744	FPGT-TNNI3K	-	0.585876788066486	0.667051789155872	-0.0811750010893864	-6.69063272780992	14.8050140723784	7.71924502495375e-06	0.000938647158914913	-0.107064794764091	-0.0552852074146822	0.0121326344445689
chr1:74213744	FPGT	-	0.585876788066486	0.667051789155872	-0.0811750010893864	-6.69063272780992	14.8050140723784	7.71924502495375e-06	0.000938647158914913	-0.107064794764091	-0.0552852074146822	0.0121326344445689
chr1:74294067	FPGT-TNNI3K	-	0.590630466888956	0.675505395505396	-0.0848749286164397	-5.64099431283213	10.0563842350038	0.000210674101388083	0.00645469800139962	-0.118374253214007	-0.0513756040188728	0.0150460936334161
chr1:74294067	TNNI3K	-	0.590630466888956	0.675505395505396	-0.0848749286164397	-5.64099431283213	10.0563842350038	0.000210674101388083	0.00645469800139962	-0.118374253214007	-0.0513756040188728	0.0150460936334161
chr1:74360429	FPGT-TNNI3K	-	0.523613553813134	0.642418926103137	-0.118805372290003	-5.83440478662172	16.6103858297332	2.18426855997574e-05	0.00170724008121232	-0.161844218000527	-0.0757665265794792	0.0203628950398545
chr1:74360429	TNNI3K	-	0.523613553813134	0.642418926103137	-0.118805372290003	-5.83440478662172	16.6103858297332	2.18426855997574e-05	0.00170724008121232	-0.161844218000527	-0.0757665265794792	0.0203628950398545
chr1:74360429	AC093158.1	-	0.523613553813134	0.642418926103137	-0.118805372290003	-5.83440478662172	16.6103858297332	2.18426855997574e-05	0.00170724008121232	-0.161844218000527	-0.0757665265794792	0.0203628950398545
chr1:74610573	ERICH3-AS1	-	0.5573780463389	0.643253968253968	-0.0858759219150688	-6.11890814484889	16.0807646467167	1.44853122530415e-05	0.00134455976212509	-0.115615629705697	-0.0561362141244402	0.0140345172508207
chr1:74610573	ERICH3	-	0.5573780463389	0.643253968253968	-0.0858759219150688	-6.11890814484889	16.0807646467167	1.44853122530415e-05	0.00134455976212509	-0.115615629705697	-0.0561362141244402	0.0140345172508207
chr1:75677676	AL137803.1	+	0.544700692229512	0.625795464582229	-0.0810947723527174	-4.96305496236153	13.2156128791813	0.000247021569487606	0.00708882285515421	-0.116336069028239	-0.0458534756771956	0.0163396885522563
chr1:75678938	AL137803.1	+	0.658971851406845	0.757999959063789	-0.0990281076569441	-8.6175719396625	17.3002393626961	1.14078282168654e-07	9.73325926830202e-05	-0.123240864766844	-0.0748153505470445	0.0114914164163998
chr1:75851473	MSH4	-	0.654990720914691	0.769188374977849	-0.114197654063158	-8.85229963469506	17.7440058984809	6.32899021459301e-08	7.12962508990979e-05	-0.141328312398212	-0.0870669957281044	0.0129003376270252
chr1:75954390	AC092813.1	-	0.542568635845947	0.636503138804929	-0.0939345029589824	-4.67662087057981	9.10327072584511	0.00112271193013112	0.0174575767478641	-0.139293688240691	-0.0485753176772735	0.0200859777943334
chr1:76515655	ST6GALNAC3	-	0.607623282853619	0.711000342412007	-0.103377059558388	-3.40168009238215	17.8735635496619	0.00320519912158729	0.0329876707529134	-0.167256470743654	-0.0394976483731229	0.0303900004559203
chr1:76517487	ST6GALNAC3	-	0.622346367595812	0.748130299184945	-0.125783931589133	-4.95689676953397	13.5200850858178	0.000233518754480565	0.00685845569389763	-0.180390854781184	-0.0711770083970824	0.0253755398664393
chr1:77072481	AL035409.2	-	0.593642120879973	0.683894619641746	-0.0902524987617734	-4.94266018519928	11.0833054336068	0.000430970626755305	0.00989194152198808	-0.130405451008935	-0.0500995465146122	0.0182599036510811
chr1:77857007	MIGA1	-	0.576131920745637	0.663773800408675	-0.0876418796630383	-4.32816098157847	8.35463480259038	0.00227433429453012	0.0267256720331856	-0.133993893308093	-0.0412898660179834	0.0202492190184376
chr1:78982036	ADGRL4	-	0.553467826744224	0.64657257181767	-0.0931047450734456	-5.07789247574161	12.6773550227095	0.000228980573286248	0.00678039055102147	-0.132818502323574	-0.053390987823317	0.018335312438818
chr1:79032400	ADGRL4	+	0.592301677019722	0.768140096618357	-0.175838419598635	-3.59461603580019	14.2322393871376	0.00286096517899832	0.0307638749278788	-0.280594912228013	-0.0710819269692573	0.0489171632929336
chr1:79069307	ADGRL4	+	0.608763669904974	0.712646406801279	-0.103882736896305	-6.32516728751716	16.9236709689403	7.77031198003605e-06	0.000943069159620354	-0.138545652846471	-0.0692198209461388	0.0164237137413456
chr1:79980916	AC099671.1	-	0.648396053305385	0.730744810744811	-0.0823487574394253	-7.6780032619265	11.2786407939337	8.29854835910081e-06	0.000975262612272585	-0.105883987264046	-0.0588135276148044	0.0107252829453426
chr1:80009975	AC099671.1	-	0.563832284298535	0.65048805847471	-0.0866557741761751	-5.25334801825364	14.4972497408667	0.000108845957440366	0.00438587923586299	-0.121921258234566	-0.0513902901177841	0.0164953423750102
chr1:81943923	ADGRL2	-	0.484067444215368	0.587265611626225	-0.103198167410857	-4.77428081357883	7.66479817538116	0.00157736303504807	0.0214372328197867	-0.153425451622591	-0.052970883199123	0.021615437264885
chr1:82758879	AL157944.1	-	0.584561991626007	0.707027929668931	-0.122465938042924	-8.39913229885595	17.662124189289	1.40360074888216e-07	0.000107305505356172	-0.153141088519843	-0.0917907875660049	0.014580784500752
chr1:83015395	LINC01362	-	0.616973689825581	0.698521588564692	-0.0815478987391114	-7.00123648058301	15.3388250392983	3.77614582040024e-06	0.000625635279637972	-0.106326582118393	-0.0567692153598299	0.0116476423793531
chr1:83602515	LINC01725	+	0.656666289705668	0.763766253239937	-0.10709996353427	-3.87982771658158	16.2523177462268	0.00129512427043876	0.0190036393131847	-0.165544735027767	-0.0486551920407732	0.0276043090976815
chr1:83687363	LINC01725	-	0.634444512062696	0.751207134611698	-0.116762622549002	-3.7646941087648	10.0695490336384	0.0036488915686221	0.0357023988744094	-0.185804081143069	-0.0477211639549338	0.0310151686101561
chr1:84158379	PRKACB	-	0.655910825868809	0.786221153100949	-0.130310327232139	-12.4636143550717	9.15782267211762	4.73935800560564e-07	0.000198236922719949	-0.153899781048044	-0.106720873416235	0.010455259888486
chr1:84395063	UOX	+	0.653043602394169	0.738725025220034	-0.0856814228258654	-9.68732626242571	14.4027308333464	1.08147756462549e-07	9.46809455725195e-05	-0.104601758252254	-0.0667610873994767	0.00884469259161823
chr1:84540526	SPATA1	-	0.58570711011748	0.678159959813186	-0.0924528496957051	-7.89433157365222	17.9883451951761	2.97327969433645e-07	0.000158943198266144	-0.117058511221705	-0.0678471881697053	0.0117112954824791
chr1:84540526	AL359762.3	-	0.58570711011748	0.678159959813186	-0.0924528496957051	-7.89433157365222	17.9883451951761	2.97327969433645e-07	0.000158943198266144	-0.117058511221705	-0.0678471881697053	0.0117112954824791
chr1:84879084	LPAR3	-	0.534454595577775	0.622038944452738	-0.0875843488749624	-6.11236640981437	10.6573175762862	8.69795151886643e-05	0.00384244136527043	-0.119246523662316	-0.0559221740876087	0.0143290409970076
chr1:85564485	AC092807.4	+	0.560024038600948	0.676089845826688	-0.11606580722574	-6.19385568295617	10.9799809139459	6.82834163139394e-05	0.00332870666816336	-0.157318940930103	-0.074812673521378	0.0187388620540712
chr1:85564485	DDAH1	+	0.560024038600948	0.676089845826688	-0.11606580722574	-6.19385568295617	10.9799809139459	6.82834163139394e-05	0.00332870666816336	-0.157318940930103	-0.074812673521378	0.0187388620540712
chr1:85568330	AC092807.4	+	0.636451895785011	0.7273278393483	-0.0908759435632885	-4.11456112804005	7.37179525728355	0.00401683710247821	0.03785233702551	-0.142572790422875	-0.0391790967037021	0.0220864244655363
chr1:85568330	DDAH1	+	0.636451895785011	0.7273278393483	-0.0908759435632885	-4.11456112804005	7.37179525728355	0.00401683710247821	0.03785233702551	-0.142572790422875	-0.0391790967037021	0.0220864244655363
chr1:85736085	COL24A1	+	0.611773285904947	0.713929146537842	-0.102155860632896	-5.11943982424292	7.36200840581348	0.00117359983423721	0.0179245713086724	-0.148874457577633	-0.0554372636881578	0.0199544997382605
chr1:85897629	COL24A1	+	0.596725053657827	0.692624269005848	-0.0958992153480211	-4.64824822099215	10.246440785529	0.00085344483680083	0.0148432551369406	-0.141719100343668	-0.0500793303523744	0.0206312595172794
chr1:86099200	COL24A1	+	0.632157848444829	0.744805234933155	-0.112647386488325	-8.05181483086441	17.7112454474936	2.50564213353608e-07	0.00014549363899046	-0.142074323861388	-0.0832204491152628	0.0139903101169842
chr1:86104159	COL24A1	-	0.656029381280262	0.749411196102373	-0.0933818148221106	-5.26397761896897	9.69253553843648	0.000405767468812191	0.009540209300931	-0.133079131583811	-0.05368449806041	0.0177397818876747
chr1:86293086	LINC02795	-	0.478940735992905	0.632368223786988	-0.153427487794083	-5.5507680020221	10.4935593836712	0.00020480431163563	0.00634956556832088	-0.214624556295538	-0.0922304192926276	0.0276407675006757
chr1:86658817	CLCA4-AS1	+	0.63672346664041	0.735236732797708	-0.0985132661572983	-10.3204127261211	11.1534039351745	4.79125172688269e-07	0.000199019979568046	-0.119487518534009	-0.0775390137805875	0.00954547737300855
chr1:86676825	CLCA4-AS1	+	0.552496908018917	0.643117618525967	-0.0906207105070503	-5.16893165202211	9.21401099815638	0.000545526234961578	0.0113582486443927	-0.1301404376496	-0.0511009833645002	0.0175318066880608
chr1:88193474	PKN2-AS1	+	0.636739862825935	0.770862834495081	-0.134122971669145	-7.51796721572605	15.1282141004667	1.74134270407965e-06	0.000404373718138931	-0.172120672438901	-0.0961252708993903	0.0178403240956661
chr1:88254692	PKN2-AS1	-	0.591271983377247	0.703242378013545	-0.111970394636299	-7.04913205148405	11.7377322263038	1.50767896031139e-05	0.00137493094504276	-0.14666523098637	-0.0772755582862274	0.0158842810460226
chr1:88589978	PKN2-AS1	+	0.596971025252206	0.693491541353383	-0.0965205161011773	-6.53692270100368	8.65446884582848	0.000127447745190588	0.00480577613053512	-0.130126646748892	-0.0629143854534627	0.0147654363552987
chr1:88589992	PKN2-AS1	+	0.660824198100293	0.744652589761285	-0.0838283916609928	-6.37387342394229	12.5859076424736	2.83767017374041e-05	0.00199180283800588	-0.112336612445455	-0.0553201708765304	0.0131518758038255
chr1:91341756	HFM1	+	0.624170433853417	0.733968488126703	-0.109798054273286	-7.44019369853003	11.5748247686428	9.65802639215663e-06	0.00106705709869164	-0.142083191509534	-0.077512917037037	0.0147574187880322
chr1:91842179	TGFBR3	+	0.625752326242313	0.720297619047619	-0.0945452928053061	-6.97003348810337	17.8852231168025	1.70489284528395e-06	0.000399811253865716	-0.12305644694463	-0.0660341386659821	0.0135645392474338
chr1:93513115	FNBP1L	+	0.599844715469716	0.689696108489212	-0.0898513930194964	-7.22227017632901	10.7688690143327	1.91233465298948e-05	0.00158010569421807	-0.117305458331632	-0.0623973277073604	0.0124408795054475
chr1:93688473	BCAR3	-	0.571813603063603	0.65801036133517	-0.0861967582715665	-5.75538070198819	12.1785952457086	8.5784065802484e-05	0.00381305444236446	-0.118775245928681	-0.0536182706144523	0.0149767257345444
chr1:94157635	ARHGAP29	-	0.602114039482376	0.699677598175702	-0.0975635586933257	-5.41390967641157	9.13206923902156	0.000404438039847677	0.00952301242151347	-0.138239986895582	-0.0568871304910691	0.0180209062442269
chr1:94193495	ARHGAP29	+	0.646196146012751	0.747786930197055	-0.101590784184304	-5.78090245983098	9.92427181642796	0.000182795187730172	0.00593390731566117	-0.140787556603261	-0.0623940117653464	0.0175735163999418
chr1:94193717	ARHGAP29	+	0.614875348132564	0.699355994118636	-0.084480645986072	-4.5084238352715	9.08635156781671	0.00143604288899616	0.020228816880139	-0.126808521955552	-0.0421527700165924	0.0187383992882702
chr1:94219650	ARHGAP29	-	0.628751325705107	0.718349134525605	-0.0895978088204978	-8.20042049062353	12.25640467219	2.53292836614788e-06	0.000501352849269778	-0.113348404104726	-0.0658472135362699	0.0109260017730731
chr1:95183815	TLCD4-RWDD3	+	0.680975559017691	0.566046698872786	0.114928860144905	3.62771605798954	9.52356182110346	0.00501443050489509	0.0433265498139454	0.0438580769563258	0.185999643333485	0.0316807760882472
chr1:95183815	TLCD4	+	0.680975559017691	0.566046698872786	0.114928860144905	3.62771605798954	9.52356182110346	0.00501443050489509	0.0433265498139454	0.0438580769563258	0.185999643333485	0.0316807760882472
chr1:95183815	AC092802.2	+	0.680975559017691	0.566046698872786	0.114928860144905	3.62771605798954	9.52356182110346	0.00501443050489509	0.0433265498139454	0.0438580769563258	0.185999643333485	0.0316807760882472
chr1:95973685	LINC02790	-	0.594037429104877	0.675375585456855	-0.0813381563519777	-4.16866830541429	7.36774124040468	0.0037488196302327	0.0362921475089417	-0.12701344271138	-0.0356628699925757	0.0195117841940879
chr1:96311500	LINC01787	-	0.657111119549289	0.758227180472171	-0.101116060922882	-4.75274779595005	16.2060239918845	0.000209032336574925	0.0064282187465187	-0.14617109472187	-0.0560610271238948	0.0212752843752926
chr1:975017	PLEKHN1	+	0.590996204672675	0.686193151319963	-0.0951969466472877	-7.23416779579931	17.9082314865812	1.02667714402834e-06	0.000299610970441041	-0.122853873797663	-0.0675400194969129	0.0131593500917363
chr1:99182119	AL445433.2	-	0.565455593029269	0.656125356125356	-0.0906697630960872	-6.09497133888137	13.2181095108249	3.54707676254154e-05	0.00227809366645672	-0.122753927094079	-0.0585855990980954	0.01487615905881
chr1:99192102	AL445433.2	+	0.596054195816469	0.677708496579489	-0.0816543007630196	-5.37762731546411	17.9996720038804	4.13075136214286e-05	0.00248682086633024	-0.113554901931996	-0.0497536995940432	0.0151840757964412
chr1:99229121	AL445433.2	-	0.586761620864281	0.698896103896104	-0.112134483031823	-5.61189600367298	10.6752899510142	0.000175980926531441	0.00580028497795382	-0.156277379463222	-0.0679915866004242	0.0199815682540146
chr1:99473040	LINC01708	-	0.592245544764342	0.68905134897782	-0.0968058042134778	-5.6047005000095	7.8415603050211	0.000544873817722877	0.0113503582797686	-0.136776207142926	-0.0568354012840294	0.0172722528551372
chr1:99483984	LINC01708	+	0.602713172538471	0.682984765492505	-0.0802715929540343	-4.90627295397156	11.5435066489919	0.000405502912918659	0.0095379015985786	-0.11607615509913	-0.0444670308089386	0.0163610124644728
chr1:99506433	LINC01708	+	0.416716112877521	0.537242782005481	-0.120526669127961	-3.55821625721949	15.740009265738	0.00267900067233024	0.0295314495514281	-0.192430268585195	-0.0486230696707267	0.0338727779356908
chr10:100170561	ERLIN1	+	0.651837667713386	0.733781918564527	-0.0819442508511408	-4.41592376675379	8.38685734350055	0.00199565812941168	0.0246980062814145	-0.124394552499291	-0.0394939492029902	0.0185565365661598
chr10:102608340	SUFU	+	0.626447941455969	0.714921652421652	-0.0884737109656833	-4.59779129803868	14.8036345944	0.000360133649413287	0.00889505784954828	-0.129535894654524	-0.0474115272768431	0.0192426548380794
chr10:104447075	CFAP58	-	0.546153187677052	0.643282237580483	-0.0971290499034312	-4.63314623539949	8.41055235405916	0.00147286745524653	0.0205608823493203	-0.145064314206344	-0.0491937856005182	0.0209639508378384
chr10:105894954	AL731574.1	+	0.592799449167409	0.724142732309701	-0.131343283142293	-6.53615580860856	17.993873858671	3.83692623159324e-06	0.00063037705271951	-0.173562095033607	-0.089124471250978	0.0200948825254907
chr10:107061157	SORCS1	+	0.510055014828898	0.621679894179894	-0.111624879350996	-5.27196470807527	12.6347800324379	0.000166044804827336	0.00560983557667036	-0.157501780252295	-0.0657479784496976	0.0211732979130183
chr10:107934857	LINC01435	+	0.623510260747656	0.711198210904627	-0.0876879501569714	-5.77009717522946	17.3655833020925	2.08291581921002e-05	0.00166182561660502	-0.119699397010098	-0.0556765033038448	0.0151969624590394
chr10:108723025	LINC02661	+	0.572350877495712	0.698186265164292	-0.12583538766858	-13.766896175916	15.1570641417826	5.64774071319053e-10	7.23658763994232e-06	-0.145300189901941	-0.106370585435219	0.00914043267709957
chr10:108723033	LINC02661	+	0.584212525900134	0.685494341094195	-0.101281815194061	-10.2952851224589	14.4028574264663	4.99376468146787e-08	6.31930358549231e-05	-0.122326326190428	-0.0802373041976943	0.00983768919358211
chr10:108815428	LINC02661	+	0.621220197311721	0.711701261701262	-0.0904810643895408	-3.71582174101614	8.21699882265059	0.00563345264430895	0.0464165686606526	-0.146375693006472	-0.0345864357726102	0.0243502166400473
chr10:113882355	NHLRC2	-	0.576118949857604	0.663398692810457	-0.0872797429528531	-3.84392748159663	14.4877004341582	0.00168857133958113	0.022339789958102	-0.135825653609187	-0.0387338322965188	0.0227058765730409
chr10:115172802	AC016042.1	-	0.522370530238489	0.630489386092834	-0.108118855854346	-6.89631749018918	16.9644863921337	2.61787846968495e-06	0.000509872115361893	-0.141201327544505	-0.0750363841641858	0.0156777665773302
chr10:115172802	ATRNL1	-	0.522370530238489	0.630489386092834	-0.108118855854346	-6.89631749018918	16.9644863921337	2.61787846968495e-06	0.000509872115361893	-0.141201327544505	-0.0750363841641858	0.0156777665773302
chr10:115367252	ATRNL1	-	0.597359742878872	0.49672619047619	0.100633552402681	3.90474269975775	17.9953379102854	0.00103881849332678	0.016676753214393	0.0464873023886109	0.154779802416751	0.0257721340791352
chr10:115475767	ATRNL1	-	0.657913207315948	0.453869394494395	0.204043812821554	5.50171019200545	10.4864897993007	0.000220440177314718	0.00663707658897274	0.121924771850474	0.286162853792633	0.0370873429716546
chr10:115485653	ATRNL1	-	0.603495127485811	0.698818303038252	-0.0953231755524412	-9.2590171102252	13.8552605845816	2.61485605319629e-07	0.000148322664879193	-0.117425784018931	-0.0732205670859518	0.010295172199992
chr10:115578910	ATRNL1	-	0.348950741293657	0.490999246750012	-0.142048505456355	-4.62018820262899	12.2062901676413	0.000564490952612891	0.0116014613312459	-0.208911144981525	-0.0751858659311847	0.0307451773015493
chr10:115600602	ATRNL1	-	0.611782937052393	0.468251291021156	0.143531646031237	5.50791879561192	16.9049877385293	3.91891962065446e-05	0.00241008091905221	0.0885281107575146	0.198535181304958	0.0260591434546177
chr10:115628515	ATRNL1	-	0.568045871666744	0.684219070403281	-0.116173198736536	-7.38104339250663	16.7588290076797	1.17078713841252e-06	0.000321458514557867	-0.149416871317141	-0.0829295261559322	0.0157394005913144
chr10:115638684	ATRNL1	+	0.549506388048818	0.701183350533196	-0.151676962484378	-4.70153613495507	8.54046152219292	0.00128864676909643	0.0189468513036376	-0.225259753239957	-0.0780941717287989	0.0322611500008874
chr10:115755983	ATRNL1	-	0.360191359744403	0.465839119064926	-0.105647759320523	-5.47394862645896	16.6546404333228	4.42524940454291e-05	0.00259255068568257	-0.146431829399573	-0.0648636892414721	0.0193001006275182
chr10:115756358	ATRNL1	-	0.607292654517334	0.687428675173773	-0.0801360206564394	-4.02721563787038	8.46120987463167	0.00338815155856492	0.0341381680783053	-0.125590569036851	-0.0346814722760276	0.0198986167770286
chr10:118984425	AL157388.1	+	0.631181100645386	0.726828181565024	-0.0956470809196373	-6.93167962474846	17.1253322263857	2.32891036947251e-06	0.000475430721832861	-0.12474324073534	-0.0665509211039345	0.0137985432243788
chr10:120562403	PLPP4	-	0.625312934885219	0.710277777777778	-0.0849648428925586	-4.5304682100367	10.2126339821684	0.00103399616211968	0.0166333019961787	-0.126633945013158	-0.0432957407719586	0.0187540975796562
chr10:122027457	TACC2	-	0.627140375369804	0.737164750957854	-0.11002437558805	-7.04017657851055	8.55965318910712	7.76949152881171e-05	0.00359815870741063	-0.145656717339418	-0.0743920338366816	0.0156280704554895
chr10:122736983	DMBT1P1	-	0.597936874288719	0.714006734006734	-0.116069859718015	-5.88401399302692	8.91770561777979	0.00024218468849111	0.0070050005190779	-0.160756715609503	-0.0713830038265258	0.0197263058611974
chr10:125676794	TEX36	-	0.579469012925616	0.66125973809632	-0.0817907251707034	-4.73448237350944	16.7198801129033	0.000200101351527055	0.0062607421267589	-0.118285494104107	-0.0452959562372996	0.0172755369474691
chr10:125677934	TEX36	-	0.614693045050188	0.708270676691729	-0.0935776316415413	-4.79925364303957	8.85161415312095	0.00102141470739018	0.0165081509470791	-0.137798984533915	-0.0493562787491675	0.0194983717472942
chr10:125896945	FANK1	-	0.531498897145741	0.662189677894262	-0.130690780748521	-4.00041356130811	10.7177927351314	0.0021939083666333	0.02614854621798	-0.202827134503068	-0.0585544269939746	0.0326693174957107
chr10:125926676	FANK1	-	0.454039420710346	0.37038826258526	0.0836511581250859	4.7218760202462	17.7034806347204	0.00017744451077884	0.00582864990985135	0.0463871992016795	0.120915117048492	0.0177156616917537
chr10:126355102	ADAM12	+	0.61336235870208	0.74415374947633	-0.13079139077425	-7.6962302678488	14.6805549275985	1.5860227899487e-06	0.000382747329475188	-0.167082472126359	-0.0945003094221418	0.0169942148587516
chr10:126790736	C10orf90	+	0.61706744806764	0.703442639375708	-0.0863751913080676	-5.79218368045808	14.2282355517799	4.37721337011991e-05	0.00257543146537527	-0.118310979946595	-0.0544394026695399	0.0149123708903576
chr10:126793958	C10orf90	+	0.583450189615068	0.673329052573535	-0.0898788629584668	-3.79903694115663	8.75945591002925	0.0044378115792746	0.0402234504415814	-0.143622591959007	-0.036135133957927	0.0236583282422894
chr10:127005791	DOCK1	-	0.594948709642333	0.712924836601307	-0.117976126958974	-9.43996606617112	10.3160902414363	2.13279232960037e-06	0.000451943818467735	-0.145707107116494	-0.0902451468014542	0.0124975160007991
chr10:127005791	AL359094.1	-	0.594948709642333	0.712924836601307	-0.117976126958974	-9.43996606617112	10.3160902414363	2.13279232960037e-06	0.000451943818467735	-0.145707107116494	-0.0902451468014542	0.0124975160007991
chr10:127550222	NPS	-	0.619937705176538	0.703851524038954	-0.083913818862416	-5.23053443205543	9.31287439798143	0.000484539288479468	0.0106174659344607	-0.120020748665022	-0.0478068890598103	0.0160430678647575
chr10:12914407	AL353586.1	-	0.63627752584981	0.730882352941176	-0.0946048270913663	-5.53341537109301	9.90679124800151	0.000258371502071831	0.00728273447569132	-0.132747965428487	-0.0564616887542457	0.0170970044261613
chr10:12914407	CCDC3	-	0.63627752584981	0.730882352941176	-0.0946048270913663	-5.53341537109301	9.90679124800151	0.000258371502071831	0.00728273447569132	-0.132747965428487	-0.0564616887542457	0.0170970044261613
chr10:132273496	STK32C	+	0.672097495124532	0.777104542966612	-0.10500704784208	-7.23571224851961	12.6598370204067	7.6611970309969e-06	0.000934810438694017	-0.136444881167491	-0.0735692145166688	0.0145123305398945
chr10:132273702	STK32C	+	0.633308962513003	0.718545826154522	-0.0852368636415184	-8.15530705237238	9.78303832308592	1.1399167433832e-05	0.00117074064407346	-0.108594909558484	-0.0618788177245533	0.010451705017866
chr10:1371560	ADARB2	+	0.585066297759936	0.685507688768558	-0.100441391008622	-7.54814255076119	16.7499589737691	8.76429316858263e-07	0.000275205829712881	-0.128548179210907	-0.0723346028063371	0.0133067692260917
chr10:14158505	FRMD4A	+	0.576197148633234	0.662204415954416	-0.0860072673211819	-4.63164252807132	13.1064265840553	0.000460110698571238	0.0102864180460132	-0.126091135362773	-0.0459233992795904	0.0185694959833173
chr10:15060100	OLAH	-	0.653058848400157	0.743674096763177	-0.0906152483630203	-5.37717194949028	6.89789772778765	0.00108443368945645	0.017108938122336	-0.130583402866037	-0.0506470938600036	0.0168518413050953
chr10:15271173	FAM171A1	+	0.586239502388571	0.669325396825397	-0.0830858944368261	-5.54125550146438	9.93743714328599	0.000252749535982537	0.00719032893174639	-0.116523264837511	-0.0496485240361412	0.0149940558443604
chr10:15284952	FAM171A1	+	0.570247894601009	0.658739480380503	-0.088491585779494	-6.47197355365582	17.2358218372162	5.37095602648528e-06	0.000760450016819201	-0.117309152061894	-0.0596740194970936	0.0136730450218709
chr10:15836931	MINDY3	+	0.60948183823933	0.728447988532022	-0.118966150292692	-10.2653018797713	12.181429982874	2.36497984746242e-07	0.000139926021940461	-0.144175096769107	-0.093757203816277	0.0115891526314608
chr10:17199496	TRDMT1	+	0.581637125160456	0.672868389780155	-0.091231264619699	-7.67365420238825	17.9731261397555	4.45548444071199e-07	0.000192402540534111	-0.116211582234785	-0.0662509470046134	0.0118888944189465
chr10:18225467	AL390783.1	-	0.635387222734359	0.726846435885173	-0.0914592131508138	-7.00690904439489	11.7131150727473	1.6154977216129e-05	0.0014312011736225	-0.1199760912136	-0.0629423350880276	0.0130527187624871
chr10:18225467	CACNB2	-	0.635387222734359	0.726846435885173	-0.0914592131508138	-7.00690904439489	11.7131150727473	1.6154977216129e-05	0.0014312011736225	-0.1199760912136	-0.0629423350880276	0.0130527187624871
chr10:18364520	CACNB2	-	0.572082667405774	0.654387104880608	-0.0823044374748344	-4.18728105330409	9.13257569979403	0.00227615636728286	0.0267408308050595	-0.126670788431521	-0.0379380865181476	0.019655818758545
chr10:19666347	MALRD1	-	0.55187015025052	0.635112443228175	-0.083242292977655	-4.79776959022047	10.5781924772937	0.000619835809297716	0.0122802186909787	-0.121616447595287	-0.0448681383600225	0.0173502064682997
chr10:19779838	MALRD1	+	0.584534491627592	0.724235588972431	-0.139701097344839	-6.08206899344645	6.48312750952826	0.000671117687978933	0.0128674321745599	-0.194905216216739	-0.0844969784729395	0.0229693378183263
chr10:20052804	PLXDC2	+	0.61961616329672	0.701053671728729	-0.0814375084320087	-4.36766663748975	7.12563389212677	0.00314720223682518	0.032608599353667	-0.125370111579293	-0.0375049052847247	0.0186455412446069
chr10:21674355	MLLT10	-	0.620560310063512	0.707333469000136	-0.0867731589366239	-7.39689147214325	11.5715955941028	1.02374324636544e-05	0.00110473935716329	-0.112438224549676	-0.0611080933235715	0.011731030428581
chr10:2310913	LINC00701	+	0.598175295932466	0.683493674629659	-0.0853183786971933	-6.79543781793117	14.8165921216009	6.44157015029854e-06	0.00084660036375599	-0.112108128166159	-0.0585286292282278	0.0125552438243292
chr10:23331974	C10orf67	+	0.600420835203444	0.694371056098745	-0.0939502208953009	-4.84868110079973	7.87377382863688	0.00133295776483579	0.019337616208674	-0.13875738276478	-0.0491430590258223	0.0193764487583654
chr10:23738376	KIAA1217	-	0.617542676375598	0.698754910213244	-0.0812122338376459	-7.33278122492846	8.62309928843742	5.51856576364884e-05	0.00294382609058992	-0.106434067568486	-0.0559904001068056	0.0110752293497531
chr10:24454088	KIAA1217	+	0.628724859509021	0.73492815558033	-0.106203296071309	-8.17738482641514	11.4100509261795	4.17979910715003e-06	0.00066174308976741	-0.134663622253847	-0.0777429698887696	0.0129874401566921
chr10:25317268	GPR158	-	0.591060192513394	0.69044553165158	-0.0993853391381853	-5.20630975378872	12.9058979098799	0.00017326928733928	0.00574633987741001	-0.1406560723795	-0.0581146058968707	0.0190894018677742
chr10:2534568	AL713851.1	+	0.598195775405744	0.700644355644356	-0.102448580238612	-4.01034392095493	9.31621070464934	0.00285564184285374	0.0307351638744549	-0.159940213648715	-0.0449569468285082	0.0255460833928221
chr10:2534618	AL713851.1	+	0.612730085286476	0.701047664091142	-0.088317578804666	-7.38818640977579	17.9598201319579	7.56877410293333e-07	0.00025287840502478	-0.113435800914566	-0.0631993566947654	0.0119538915108865
chr10:2549824	AL713851.1	+	0.602423130336664	0.685813696733237	-0.0833905663965728	-4.21932891367437	7.16580572507514	0.00373796847128947	0.0362303423290342	-0.129906539715772	-0.0368745930773735	0.0197639406888412
chr10:25665777	LINC00836	-	0.608301217129975	0.737118591242013	-0.128817374112038	-4.11270465123794	9.45551258917883	0.00236506526464531	0.027351616687059	-0.199155318766044	-0.0584794294580322	0.0313218149699282
chr10:25956596	MYO3A	-	0.622333798520106	0.702631088047755	-0.0802972895276486	-4.67326331121637	10.2647513356424	0.000817100798342038	0.0144590505119446	-0.118448355803729	-0.0421462232515682	0.0171822737518183
chr10:26596298	AL160287.1	-	0.629327451342047	0.812384419075462	-0.183056967733416	-10.6693134248009	15.0509105827245	2.04673337950378e-08	4.3501406874884e-05	-0.219616187277308	-0.146497748189523	0.0171573334145286
chr10:27732232	MKX	-	0.648667384182643	0.738312772795531	-0.0896453886128885	-6.43959633299492	16.9402936464129	6.21322109707528e-06	0.000829567884358508	-0.119023942825806	-0.0602668343999706	0.013920963982411
chr10:27808541	ARMC4	+	0.629207804266413	0.718711351499664	-0.0895035472332514	-11.3021226342962	17.9875208898433	1.32619428817396e-09	1.15987749726331e-05	-0.106141955129663	-0.0728651393368393	0.00791918032827333
chr10:27921973	ARMC4	+	0.648960683671782	0.759531590413943	-0.110570906742161	-8.29886321040779	16.096404208811	3.28825236692094e-07	0.000167701850137598	-0.138801979033104	-0.0823398344512189	0.0133236208308015
chr10:28458918	LINC02652	-	0.642401084467648	0.728474266961109	-0.0860731824934612	-5.87058073732324	8.98242805858391	0.000239406113569372	0.00696070921588451	-0.119250333772197	-0.0528960312147255	0.0146617832791628
chr10:30948620	ZNF438	+	0.574476867682618	0.67818561783303	-0.103708750150411	-5.05145304590037	9.65555758031307	0.000555019880137262	0.0114850866017788	-0.149675670687345	-0.057741829613478	0.0205304788954891
chr10:31111029	AL359546.1	-	0.666569231510312	0.828014553269205	-0.161445321758893	-6.24466959083433	17.9978948226923	6.85847773053352e-06	0.000877530856009755	-0.215761546765561	-0.107129096752225	0.0258533008689292
chr10:31111078	AL359546.1	-	0.679762488078815	0.78228106516497	-0.102518577086156	-3.68893246895965	16.2305144755282	0.00194714652187091	0.0243216396479139	-0.161364621940691	-0.0436725322316212	0.0277908522177605
chr10:31196692	LINC02664	-	0.637125161022658	0.719510720830061	-0.0823855598074028	-5.6290830133057	13.9344094465192	6.32817693131848e-05	0.00317911371844719	-0.113789878110663	-0.0509812415041425	0.0146356981434924
chr10:31295144	ZEB1-AS1	-	0.656060816010945	0.785945150528484	-0.129884334517539	-7.36049439824385	10.2166017787047	2.15487893561775e-05	0.00169576157240902	-0.169089692430434	-0.0906789766046439	0.0176461427032032
chr10:32427544	AL391839.3	-	0.645348238189517	0.729664660116493	-0.0843164219269764	-5.68706703851097	17.8817995279635	2.206976205008e-05	0.00171845093378661	-0.11547944441112	-0.0531533994428324	0.0148259940239869
chr10:32559834	CCDC7	+	0.641606369820656	0.751036866359447	-0.109430496538791	-5.99656610661377	17.0454836484371	1.42753672658458e-05	0.00133313906572725	-0.147924401442983	-0.0709365916345994	0.0182488601965211
chr10:32669646	CCDC7	-	0.590006195083976	0.697125170925036	-0.10711897584106	-3.59641427862393	13.698201092553	0.00301306892391173	0.0317554441240065	-0.171133609266096	-0.0431043424160235	0.0297849378692952
chr10:32717626	CCDC7	+	0.643250401344666	0.727606101801957	-0.0843557004572913	-4.41392775649175	10.2464508673401	0.00123192588739829	0.0184428346304892	-0.126799808530876	-0.0419115923837072	0.0191112553514782
chr10:34349620	PARD3	+	0.523484463833843	0.66535723366387	-0.141872769830027	-6.16866206403555	11.2040740613901	6.48265382487457e-05	0.00322755004072538	-0.192380860109932	-0.0913646795501222	0.0229989531534191
chr10:34488123	PARD3	-	0.569069445960202	0.66359649122807	-0.0945270452678679	-6.15467654815391	17.3817798262603	9.59769643406788e-06	0.00106318218575408	-0.126876668509652	-0.062177422026084	0.0153585723844775
chr10:34703045	PARD3	+	0.568191705586664	0.657395462753932	-0.089203757167268	-4.61510946691908	12.2247571907237	0.00056729459494878	0.011636374567794	-0.131231516698138	-0.0471759976363983	0.0193286330057124
chr10:37147691	ANKRD30A	+	0.61499258177895	0.717628284183716	-0.102635702404766	-9.34124796973829	16.3201026378303	5.92902188910172e-08	6.91356633821441e-05	-0.125890801447785	-0.0793806033617471	0.0109873651504876
chr10:37219859	ANKRD30A	+	0.563535089967252	0.683676123148864	-0.120141033181612	-6.68216641742355	12.5640786932575	1.79279076702181e-05	0.00152214644794542	-0.159120504468839	-0.0811615618943836	0.0179793536521849
chr10:37539320	TACC1P1	+	0.584402033008844	0.719347319347319	-0.134945286338475	-3.76677222465357	15.6548345502718	0.00174494942021479	0.0228134033656822	-0.211027589761554	-0.0588629829153966	0.035825178240207
chr10:38181349	AL117339.5	-	0.641555359741546	0.731878145523976	-0.0903227857824301	-8.0841952585229	17.8764970428507	2.21651135976141e-07	0.000135415410679242	-0.113807516256505	-0.0668380553083551	0.0111727615296285
chr10:38181349	AL117339.1	-	0.641555359741546	0.731878145523976	-0.0903227857824301	-8.0841952585229	17.8764970428507	2.21651135976141e-07	0.000135415410679242	-0.113807516256505	-0.0668380553083551	0.0111727615296285
chr10:38243531	AL117339.5	+	0.68169647812505	0.763642838642839	-0.0819463605177891	-4.90859831263589	11.2337467022873	0.000437427297988378	0.00997717979817142	-0.118597536562024	-0.0452951844735541	0.0166944523260011
chr10:42262732	AL031601.2	-	0.433606589711189	0.523885310850083	-0.0902787211388933	-4.77790925427257	9.27493706413379	0.000923233380415004	0.0155518211121781	-0.13282987477974	-0.0477275674980468	0.0188950263251992
chr10:42671394	LINC01518	+	0.609983611526389	0.722436144625964	-0.112452533099576	-4.07225313351712	6.75299757265015	0.00510952711018933	0.0437853536675222	-0.178237341636144	-0.0466677245630076	0.0276143278456889
chr10:43480328	ZNF487	-	0.648490275053141	0.731570245057087	-0.0830799700039463	-7.01733840428595	9.94000129604076	3.75282606676211e-05	0.00234908668643634	-0.10948104501605	-0.0566788949918426	0.011839242347669
chr10:43890374	LINC00840	-	0.576483683507333	0.675231481481481	-0.0987477979741481	-7.85354561883433	15.9561328657821	7.17184074263637e-07	0.000245942792563656	-0.12540871950541	-0.0720868764428863	0.0125736581624141
chr10:4441590	AC022535.3	-	0.543801524263899	0.443293171748456	0.100508352515443	5.09269193960002	12.9221556668328	0.000210273073921654	0.00644793756101188	0.0578456235329747	0.14317108149791	0.019735800576097
chr10:45024061	CEP164P1	+	0.337246501164568	0.176281099075217	0.160965402089352	3.64785754681483	9.02414180293137	0.00531133467828856	0.044801965784232	0.061186122344739	0.260744681833964	0.0441260109594742
chr10:45024061	AL358394.3	+	0.337246501164568	0.176281099075217	0.160965402089352	3.64785754681483	9.02414180293137	0.00531133467828856	0.044801965784232	0.061186122344739	0.260744681833964	0.0441260109594742
chr10:46434487	AC244230.2	+	0.641455324660423	0.734117474348417	-0.0926621496879942	-3.98136650387209	7.88607115091521	0.00417320127179946	0.0387264187194399	-0.14646725076747	-0.0388570486085185	0.0232739562152531
chr10:46434487	LINC00842	+	0.641455324660423	0.734117474348417	-0.0926621496879942	-3.98136650387209	7.88607115091521	0.00417320127179946	0.0387264187194399	-0.14646725076747	-0.0388570486085185	0.0232739562152531
chr10:46535118	AC244230.2	+	0.544914962124911	0.63173773690078	-0.0868227747758697	-5.65774424750118	8.12942934897536	0.000450213964190332	0.0101601231489524	-0.122112490205981	-0.0515330593457587	0.0153458288281971
chr10:48514800	ARHGAP22	+	0.637037783332757	0.727840528989954	-0.0908027456571976	-18.8458292779793	12.7111400246398	1.14583765407917e-10	2.78807983805571e-06	-0.1012359044298	-0.0803695868845956	0.00481818785036418
chr10:48515888	ARHGAP22	+	0.604641790091389	0.733209287692983	-0.128567497601594	-18.0002794593987	17.25799760481	1.26806440101772e-12	1.78958124722428e-07	-0.143619771472057	-0.113515223731132	0.00714252786416957
chr10:48798212	WDFY4	+	0.557303042868187	0.639223701271641	-0.0819206584034536	-3.68861886877914	17.1969354669403	0.00179258205197525	0.0231649928795851	-0.128736779830396	-0.0351045369765113	0.0222090330602705
chr10:48863674	WDFY4	-	0.657142568754765	0.753373819163293	-0.096231250408528	-8.16756690676571	15.7619660441036	4.70649216221462e-07	0.000197611094615188	-0.121238919182663	-0.0712235816343926	0.011782119633304
chr10:48972315	WDFY4	-	0.591827710105021	0.672032828282828	-0.0802051181778073	-3.93307442769763	7.79352510627671	0.00456804617692641	0.0409306516323511	-0.127447988544486	-0.032962247811129	0.0203924740434567
chr10:51280680	PRKG1	-	0.583017373616113	0.678869047619048	-0.0958516740029344	-5.55335310183928	7.23816120388549	0.000763678836188294	0.013893986102544	-0.136394766893537	-0.0553085811123314	0.017260143960806
chr10:52132453	PRKG1	+	0.658408096031935	0.777016842806316	-0.118608746774381	-3.48948745043712	14.7677141375671	0.00336207985327635	0.0339763869282729	-0.191156748616986	-0.0460607449317771	0.0339903061578639
chr10:52135986	PRKG1	+	0.628739876756787	0.750194033764617	-0.121454157007829	-9.15380533574063	10.5946462245554	2.34000797734695e-06	0.000476396863558919	-0.150794080732083	-0.0921142332835761	0.0132681603500587
chr10:52985060	LINC02672	-	0.597646748193691	0.734346862288039	-0.136700114094348	-9.23378492337962	14.6812815641433	1.68491698958665e-07	0.000116448227223014	-0.168314591746315	-0.10508563644238	0.0148043424477245
chr10:52996956	LINC02672	+	0.608901527571604	0.703881136661457	-0.0949796090898527	-5.81730502277261	10.3907472772773	0.000145456260194245	0.00519154530735949	-0.131174025700794	-0.0587851924789115	0.0163270807905108
chr10:53863479	PCDH15	+	0.580792428961044	0.661271615559274	-0.0804791865982302	-5.29948781394432	16.2475959179163	6.83401803379493e-05	0.00333056310192478	-0.112632708604187	-0.048325664592273	0.0151862197675913
chr10:54191880	PCDH15	+	0.585144300054845	0.498867428678214	0.0862768713766311	3.34339986017792	15.1454203421159	0.00439502246884692	0.0399814572994636	0.0313204978014238	0.141233244951838	0.0258051309998081
chr10:54280633	PCDH15	-	0.611382533528491	0.714976118652589	-0.103593585124099	-7.73836863053916	15.641031758043	9.86813545529008e-07	0.000293068255976162	-0.132025795691488	-0.0751613745567091	0.0133870057204655
chr10:54516577	AL353784.1	+	0.593305204396812	0.686339190292357	-0.0930339858955451	-5.61233382122014	8.81479954406089	0.000354824642486026	0.00881390807197617	-0.130653533883597	-0.0554144379074931	0.0165767021098754
chr10:54516577	PCDH15	+	0.593305204396812	0.686339190292357	-0.0930339858955451	-5.61233382122014	8.81479954406089	0.000354824642486026	0.00881390807197617	-0.130653533883597	-0.0554144379074931	0.0165767021098754
chr10:54603553	PCDH15	-	0.56517193124336	0.646037172703839	-0.0808652414604796	-3.67179401679309	7.98199967042857	0.00631778543099075	0.0497905928631741	-0.131671142757916	-0.0300593401630433	0.0220233599953155
chr10:54603553	AL353784.1	-	0.56517193124336	0.646037172703839	-0.0808652414604796	-3.67179401679309	7.98199967042857	0.00631778543099075	0.0497905928631741	-0.131671142757916	-0.0300593401630433	0.0220233599953155
chr10:54924915	PCDH15	-	0.602113688459486	0.7253558575927	-0.123242169133214	-7.80324689215856	17.6476306013489	3.98278833481392e-07	0.000182993808617898	-0.156471062910931	-0.0900132753554957	0.0157937036769987
chr10:55026981	PCDH15	+	0.585978164415472	0.68399856049205	-0.0980203960765778	-5.24666887850935	13.2753533086146	0.000147232312298394	0.00522728416043659	-0.138296345339556	-0.0577444468135999	0.0186824056075036
chr10:55175590	PCDH15	+	0.619278440752494	0.705691704572779	-0.0864132638202848	-6.89317473907985	15.5031380817316	4.28700302916077e-06	0.000669853716227161	-0.113057916863232	-0.0597686107773378	0.012536061697432
chr10:55320822	AC016822.1	+	0.62901907174353	0.724761904761905	-0.0957428330183748	-4.71992688599447	8.382184404713	0.00132280679951425	0.0192437640650497	-0.142151042761953	-0.0493346232747968	0.0202848127377724
chr10:55320822	PCDH15	+	0.62901907174353	0.724761904761905	-0.0957428330183748	-4.71992688599447	8.382184404713	0.00132280679951425	0.0192437640650497	-0.142151042761953	-0.0493346232747968	0.0202848127377724
chr10:59660249	SLC16A9	+	0.61625711099551	0.726514273420967	-0.110257162425457	-5.80992317391448	17.0098251004816	2.08564128900947e-05	0.00166275165627635	-0.150294188189837	-0.0702201366610774	0.0189773873294043
chr10:59735737	SLC16A9	+	0.621744571314308	0.718809054722367	-0.0970644834080597	-5.51541686285531	13.0041533284544	9.93939176191739e-05	0.00417077943977199	-0.135083052988154	-0.0590459138279651	0.0175987574142872
chr10:61430604	TMEM26	+	0.579853759462123	0.671016542068332	-0.0911627826062098	-7.51776581057942	9.62730402437785	2.50003064884706e-05	0.00184968979323417	-0.118324345792807	-0.0640012194196126	0.0121263131764387
chr10:61959	TUBB8	-	0.425300880968583	0.558976723759332	-0.13367584279075	-7.95767288378832	14.2359068608086	1.30373327474773e-06	0.000341231390699783	-0.169648806662358	-0.0977028789191413	0.016798358608467
chr10:63796736	AC013287.1	+	0.625002595264609	0.712764614294935	-0.0877620190303253	-5.6608206375829	15.4397362697716	4.05530829146722e-05	0.00245805399024762	-0.120724971560024	-0.0547990665006266	0.0155034092491223
chr10:64251514	AC013287.1	-	0.553033393519351	0.648572291235335	-0.0955388977159836	-5.50193847630077	14.0395095761753	7.71724367922849e-05	0.00358621215497242	-0.132772405611451	-0.0583053898205166	0.0173645885223019
chr10:64283075	AC013287.1	+	0.624869067222778	0.713494816762742	-0.088625749539964	-5.86142952781861	11.2441637623252	9.99148897491306e-05	0.00418343578164883	-0.121817040634864	-0.0554344584450646	0.0151201595309373
chr10:64426833	AC013287.1	+	0.588379108442134	0.677115624518568	-0.0887365160764341	-6.00427894108056	7.43593388263992	0.000428098088626128	0.00985518056791393	-0.123271952767942	-0.0542010793849261	0.0147788796868362
chr10:64460651	AC013287.1	-	0.613659500031897	0.697560541310541	-0.0839010412786444	-5.02706094351439	10.748053729194	0.000414079763814911	0.00966304202811798	-0.120740550311429	-0.0470615322458602	0.0166898794785626
chr10:64693351	AC013287.1	-	0.53114306328592	0.614838157485216	-0.0836950941992959	-4.24173157777147	12.7455168394945	0.00100370858572055	0.0163357299539838	-0.12640876611691	-0.0409814222816815	0.01973135090346
chr10:65656189	LINC01515	+	0.595897458416904	0.678573648573649	-0.082676190156745	-5.55865221724697	14.1266428273317	6.81670314490574e-05	0.00332534000944042	-0.114549702707881	-0.0508026776056088	0.0148734237951105
chr10:65677269	LINC01515	-	0.567628450944214	0.658945221445221	-0.0913167705010076	-8.08224274363586	8.12831437781938	3.70297594198227e-05	0.00233286429320349	-0.117299611958459	-0.0653339290435561	0.0112984444290432
chr10:66227900	CTNNA3	-	0.542163616649974	0.642517055265857	-0.100353438615883	-8.32533846076407	12.8798928501962	1.53706752432398e-06	0.000376887618441438	-0.126419179455717	-0.0742876977760485	0.0120539770351478
chr10:67192615	CTNNA3	+	0.603625680734814	0.726509492685963	-0.122883811951149	-10.1103433740666	17.9997656684402	7.54211661557075e-09	2.61539937928772e-05	-0.14841900302035	-0.0973486208819486	0.0121542669130656
chr10:67344593	CTNNA3	-	0.524995416728631	0.613762266323118	-0.0887668495944877	-5.19891605376747	12.8129826629253	0.000179664076687725	0.00587367894023277	-0.125708019302201	-0.0518256798867743	0.0170741071170329
chr10:67406765	CTNNA3	+	0.449130733583791	0.536182595965205	-0.087051862381414	-4.53019785180409	16.44069947767	0.000320252944434155	0.00828469723377919	-0.127699201131339	-0.0464045236314895	0.0192159073906114
chr10:6772881	AL158210.1	-	0.528547089759183	0.610452961672474	-0.0819058719132906	-5.81050965728067	17.7305635288542	1.76748299808055e-05	0.00150935154951704	-0.111553095580226	-0.0522586482463546	0.0140961596734739
chr10:6772881	AL392086.2	-	0.528547089759183	0.610452961672474	-0.0819058719132906	-5.81050965728067	17.7305635288542	1.76748299808055e-05	0.00150935154951704	-0.111553095580226	-0.0522586482463546	0.0140961596734739
chr10:6890350	AL392086.3	-	0.649369025527196	0.731313169854837	-0.0819441443276401	-7.16663712569836	17.771343241826	1.21896670571688e-06	0.000328807466405384	-0.10598850012347	-0.05789978853181	0.0114341137817348
chr10:6925914	AL392086.3	+	0.397615746069791	0.537319606985745	-0.139703860915953	-4.36622643970221	8.97200032022068	0.00182044054683433	0.023391906860884	-0.212119366660961	-0.0672883551709463	0.0319964763269313
chr10:69306332	HK1	+	0.659600175961543	0.747848443192988	-0.0882482672314451	-10.0152837522662	14.7606906669206	5.67543687255242e-08	6.77628916677416e-05	-0.107055790627125	-0.0694407438357647	0.00881135965932835
chr10:6990567	AL392086.3	-	0.564067968735344	0.644608184689706	-0.0805402159543628	-7.38331328910319	13.0592900240041	5.181176936507e-06	0.0007444552611672	-0.104095533740921	-0.0569848981678047	0.0109084110074578
chr10:7019824	AL392086.3	+	0.558722259310341	0.671665172045712	-0.112942912735371	-4.11901233817644	15.0596849096238	0.000903481961820284	0.0153547228970381	-0.171366881825909	-0.0545189436448327	0.0274199015352726
chr10:71403578	CDH23	-	0.660671063587694	0.764042831269722	-0.103371767682028	-9.29583509148661	14.5005181683208	1.71523190904605e-07	0.00011753743754914	-0.127145271983204	-0.0795982633808515	0.0111202239136857
chr10:71416508	CDH23	-	0.618794581236748	0.704742353217963	-0.0859477719812149	-4.96886714777342	8.36890388677283	0.000957603935112751	0.015886834052519	-0.125531332637136	-0.0463642113252937	0.0172972569853731
chr10:72396660	MICU1	+	0.624423946980338	0.712248535777948	-0.0878245887976096	-7.72542298160141	15.3511069702267	1.13745516038924e-06	0.000316454098540668	-0.112007273374182	-0.0636419042210367	0.0113682563410145
chr10:75943937	LRMDA	-	0.673081505329404	0.763829952297445	-0.0907484469680401	-7.92492601499381	16.1652458262127	5.84463795851569e-07	0.000221254351172598	-0.115003362476926	-0.0664935314591537	0.011451015037408
chr10:76239454	LRMDA	-	0.592311336446668	0.676058800252349	-0.0837474638056804	-6.23547118203007	13.9641793318189	2.20486888650951e-05	0.00171744415137668	-0.112560632312937	-0.0549342952984238	0.0134308156289827
chr10:76884930	KCNMA1	+	0.649015567765568	0.745270571996915	-0.0962550042313469	-6.43358818190597	17.6509726253525	5.15833727740877e-06	0.000742989043630198	-0.12773219296776	-0.0647778154949336	0.0149613250817106
chr10:76940960	KCNMA1	+	0.615662239436108	0.724574224574225	-0.108911985138116	-5.50372371447751	15.460426966327	5.43938238168483e-05	0.00291833583036444	-0.150981632316768	-0.0668423379594642	0.0197887813393728
chr10:76940960	KCNMA1-AS1	+	0.615662239436108	0.724574224574225	-0.108911985138116	-5.50372371447751	15.460426966327	5.43938238168483e-05	0.00291833583036444	-0.150981632316768	-0.0668423379594642	0.0197887813393728
chr10:77134237	KCNMA1	+	0.577050308161542	0.674775435740348	-0.0977251275788059	-6.0294818336689	11.6914659949264	6.62975623628078e-05	0.0032707739927204	-0.133142704273646	-0.0623075508839658	0.0162078815849654
chr10:78483283	LINC00595	-	0.646818231545109	0.79883273096044	-0.152014499415331	-13.7512984646677	17.8162631906004	6.32438658411601e-11	1.97024361084044e-06	-0.175256439975887	-0.128772558854775	0.0110545560338112
chr10:78483283	AC012560.2	-	0.646818231545109	0.79883273096044	-0.152014499415331	-13.7512984646677	17.8162631906004	6.32438658411601e-11	1.97024361084044e-06	-0.175256439975887	-0.128772558854775	0.0110545560338112
chr10:78494717	LINC00595	+	0.645807083282	0.810344769660807	-0.164537686378808	-12.8718179371317	13.75170509455	4.6725779732093e-09	2.15615448677611e-05	-0.192000547941626	-0.137074824815989	0.0127827853984914
chr10:78494717	AC012560.2	+	0.645807083282	0.810344769660807	-0.164537686378808	-12.8718179371317	13.75170509455	4.6725779732093e-09	2.15615448677611e-05	-0.192000547941626	-0.137074824815989	0.0127827853984914
chr10:80545229	SH2D4B	-	0.666777837674791	0.758642763407292	-0.0918649257325014	-13.5019463587858	17.9953719875767	7.42046802465095e-11	2.18172581440607e-06	-0.106159502231677	-0.077570349233326	0.0068038283734348
chr10:80625175	SH2D4B	-	0.606267461233701	0.692367656740922	-0.086100195507221	-8.46682870805415	16.8549831939784	1.78389854705263e-07	0.000119769862155041	-0.107569233188038	-0.0646311578264042	0.0101691198057801
chr10:80626266	SH2D4B	-	0.638834562846385	0.728465918788499	-0.0896313559421148	-5.32709862143491	7.53567616436286	0.000858137680228892	0.0148859821522276	-0.128851242608621	-0.0504114692756087	0.0168255484479789
chr10:81939544	NRG3	-	0.562352591879635	0.649295222132638	-0.0869426302530034	-4.33549943402301	17.1219090355123	0.000442575552882025	0.0100491295896614	-0.129229217692141	-0.0446560428138663	0.0200536596939023
chr10:82424720	NRG3	-	0.590161637754517	0.676917989417989	-0.0867563516634724	-4.24908323054611	14.0179929292177	0.0008073769796407	0.0143645761586638	-0.130542611836164	-0.042970091490781	0.0204176635185191
chr10:82435547	NRG3	-	0.594072669553651	0.711830038035281	-0.11775736848163	-5.11146131566284	12.4492125589739	0.000228802463961626	0.00677850414195721	-0.167752506994808	-0.0677622299684506	0.0230379066199309
chr10:82560813	NRG3	-	0.49462457333525	0.575221294963037	-0.0805967216277872	-3.54971045298131	9.31381770017735	0.00589053824936757	0.0477229265690037	-0.13169674922874	-0.0294966940268344	0.0227051537570046
chr10:82775165	NRG3	-	0.622615758490596	0.702793257653939	-0.0801774991633424	-4.48108009394156	14.0514055942522	0.000513108039761363	0.010962093664265	-0.118539819654858	-0.0418151786718272	0.0178924494725597
chr10:85834106	GRID1	+	0.569119769420408	0.660391492921272	-0.091271723500864	-4.23636994137762	7.87216387040903	0.00295734621650605	0.0313890526380712	-0.141094894782669	-0.0414485522190587	0.0215447953705345
chr10:85888648	GRID1	-	0.537593461590565	0.621097189322764	-0.0835037277321989	-4.94547108623981	15.2031810279165	0.000169315437602451	0.00567563510721755	-0.119451169402746	-0.047556286061652	0.0168848884719068
chr10:85908896	GRID1	+	0.608390265671727	0.704982363315697	-0.0965920976439696	-7.62381126250099	9.68045604195973	2.15540407476054e-05	0.00169576157240902	-0.124948974200651	-0.0682352210872881	0.0126697913049178
chr10:86731793	LDB3	-	0.626452188996717	0.727723665223665	-0.101271476226949	-5.84472763932878	11.081608547687	0.000108515528322955	0.00437731405866166	-0.13937366373456	-0.063169288719337	0.0173269795405862
chr10:86758471	BMPR1A	-	0.443145080598229	0.357344119440894	0.0858009611573354	5.34736857722761	11.0816561738183	0.000228898176239669	0.00677966507227535	0.0505168765574827	0.121085045757188	0.0160454548659183
chr10:86977568	AGAP11	-	0.619377253352913	0.700577200577201	-0.081199947224288	-4.15652423287822	13.5313012102818	0.00103858101901093	0.0166736280135919	-0.123236082137128	-0.0391638123114484	0.0195355404359234
chr10:86977568	ADIRF	-	0.619377253352913	0.700577200577201	-0.081199947224288	-4.15652423287822	13.5313012102818	0.00103858101901093	0.0166736280135919	-0.123236082137128	-0.0391638123114484	0.0195355404359234
chr10:87133247	SHLD2	-	0.646309332632671	0.753715053499813	-0.107405720867143	-4.5760449544153	13.6353638291413	0.000461135592919107	0.0103016701691071	-0.157873241682668	-0.056938200051617	0.0234712993288035
chr10:87422274	FAM245A	-	0.317434120025364	0.47121578099839	-0.153781660973025	-4.76508003655547	13.7114612856949	0.000319312835275085	0.00826972016252455	-0.223136468658808	-0.0844268532872422	0.0322726291674608
chr10:89482086	SLC16A12	+	0.637665316473751	0.723600505774419	-0.0859351893006682	-5.14835116983626	7.23581053330453	0.00119754707726401	0.0181425292498565	-0.125145732844998	-0.0467246457563384	0.0166917885874132
chr10:89967655	LINC01374	-	0.520395326322749	0.609284080117413	-0.0888887537946647	-4.36616243262463	15.7778113899323	0.000494744524800557	0.0107368615333736	-0.132096408112445	-0.0456810994768846	0.0203585540314475
chr10:90034785	LINC01374	+	0.636370428513286	0.823543732109729	-0.187173303596443	-7.68269186113208	14.7734938923445	1.55602628191519e-06	0.000378996866199782	-0.239171205614633	-0.135175401578254	0.0243629846126436
chr10:90074669	LINC01374	-	0.588075661576325	0.680966412619638	-0.0928907510433135	-7.7896586951516	17.4914783106725	4.3300269471943e-07	0.000189524496831514	-0.117996306583977	-0.0677851955026494	0.0119248807526227
chr10:90074669	AL139340.1	-	0.588075661576325	0.680966412619638	-0.0928907510433135	-7.7896586951516	17.4914783106725	4.3300269471943e-07	0.000189524496831514	-0.117996306583977	-0.0677851955026494	0.0119248807526227
chr10:90518227	LINC02653	-	0.539091681823231	0.631824455737499	-0.0927327739142683	-5.40872929977505	17.743346217731	4.06106960750679e-05	0.00245959651092564	-0.12879050832218	-0.0566750395063563	0.0171450203503668
chr10:94481991	TBC1D12	-	0.617356052468834	0.698199802863116	-0.0808437503942812	-5.90824548961615	14.939145257352	2.92118523711377e-05	0.00202663508484001	-0.110019168205436	-0.0516683325831266	0.0136832077367749
chr10:94482128	TBC1D12	-	0.628904585389548	0.713786907536908	-0.0848823221473597	-6.88661183655546	8.23483290991764	0.000110050531858151	0.00441233680087959	-0.113164971195637	-0.0565996730990825	0.012325701544087
chr10:94532127	TBC1D12	-	0.583258303321329	0.664313725490196	-0.0810554221688675	-3.8483554455782	7.61006503622785	0.00537585583480092	0.045130416541625	-0.130061915288273	-0.0320489290494623	0.021062353339009
chr10:94532127	HELLS	-	0.583258303321329	0.664313725490196	-0.0810554221688675	-3.8483554455782	7.61006503622785	0.00537585583480092	0.045130416541625	-0.130061915288273	-0.0320489290494623	0.021062353339009
chr10:94785312	AL583836.1	-	0.552699021333475	0.633890935805236	-0.0811919144717609	-4.92498528317978	8.95722090115474	0.000830526925823688	0.0145979392044935	-0.118512365660475	-0.0438714632830467	0.0164857171754511
chr10:94785312	CYP2C19	-	0.552699021333475	0.633890935805236	-0.0811919144717609	-4.92498528317978	8.95722090115474	0.000830526925823688	0.0145979392044935	-0.118512365660475	-0.0438714632830467	0.0164857171754511
chr10:94807458	CYP2C19	-	0.566794269403378	0.699175824175824	-0.132381554772447	-6.36376967117762	13.4662704447833	2.10646503141569e-05	0.00167273852401869	-0.177164695590143	-0.0875984139547503	0.0208023799748788
chr10:94807458	AL583836.1	-	0.566794269403378	0.699175824175824	-0.132381554772447	-6.36376967117762	13.4662704447833	2.10646503141569e-05	0.00167273852401869	-0.177164695590143	-0.0875984139547503	0.0208023799748788
chr10:94812520	AL583836.1	-	0.538942668941107	0.640007157593364	-0.101064488652257	-4.00656300399276	6.76933267252578	0.00551385704806439	0.0458230690848794	-0.161126014667248	-0.041002962637266	0.0252247346545008
chr10:94812520	CYP2C19	-	0.538942668941107	0.640007157593364	-0.101064488652257	-4.00656300399276	6.76933267252578	0.00551385704806439	0.0458230690848794	-0.161126014667248	-0.041002962637266	0.0252247346545008
chr10:94976537	CYP2C9	-	0.479318088471407	0.583281521110468	-0.103963432639062	-8.12303289740957	16.4454407086861	3.74754475493259e-07	0.000177714969297504	-0.131035644110811	-0.0768912211673129	0.0127985980054588
chr10:96217795	BLNK	-	0.605570946874259	0.70167949334616	-0.0961085464719009	-5.69881988281904	12.6852681295421	8.02795959804979e-05	0.00367177163013343	-0.132634489673637	-0.0595826032701647	0.0168646401269238
chr10:9840626	LINC02663	+	0.526783388940861	0.652578956990722	-0.125795568049861	-4.84099023420661	9.58280463867947	0.000768719419056641	0.0139487287833638	-0.184038379899569	-0.0675527562001528	0.0259855033709808
chr10:98432616	HPS1	-	0.63181404697911	0.789404765266834	-0.157590718287724	-14.2444225101482	14.3729649362905	7.11875173339168e-10	8.10200061192232e-06	-0.181261561021794	-0.133919875553655	0.0110633279920931
chr10:98504099	HPSE2	-	0.592881464551633	0.688054532486817	-0.0951730679351844	-6.153165545583	15.8007777378259	1.46804724374628e-05	0.00135396651155442	-0.127995983547462	-0.0623501523229065	0.0154673342087316
chr10:98630419	HPSE2	-	0.653875422531077	0.736769269377965	-0.0828938468468881	-6.63511917240214	10.5925711122398	4.41909221792279e-05	0.00259099803672119	-0.110520778574932	-0.055266915118844	0.01249319638322
chr10:98732167	HPSE2	+	0.484233510858057	0.597619047619048	-0.113385536760991	-12.3718189527811	17.5319808845415	4.29446409192313e-10	6.39325831537136e-06	-0.132677026143993	-0.0940940473779888	0.00916482347452255
chr10:98765713	HPSE2	+	0.539110265318248	0.668067226890756	-0.128956961572508	-8.12148391362178	16.7545379978219	3.29372961891797e-07	0.000167701850137598	-0.162495089261234	-0.0954188338837813	0.0158784974450561
chr10:9876681	LINC02663	+	0.572919900569724	0.67814916078074	-0.105229260211016	-5.44442928207168	10.0422613316305	0.000278922061472019	0.00761969199274138	-0.148269900905269	-0.0621886195167633	0.0193278771307642
chr10:98797491	HPSE2	+	0.635749821222997	0.716571596890746	-0.0808217756677493	-6.02953193015737	9.65667020497841	0.000146612159878495	0.00521432684776118	-0.110833024423685	-0.0508105269118132	0.0134043200374328
chr10:99074745	HPSE2	-	0.613817116835693	0.717236649397775	-0.103419532562082	-4.05865299848552	16.3319527543983	0.000878529052769842	0.0150929126528204	-0.157348264827563	-0.049490800296601	0.0254812452803116
chr10:99077459	HPSE2	-	0.587583907925523	0.703243238815994	-0.115659330890471	-5.57139789035475	6.81012361660275	0.000924117302676556	0.0155590152453011	-0.165026522969066	-0.0662921388118764	0.0207594814024505
chr10:99122372	HPSE2	+	0.591022167056002	0.671286923860453	-0.0802647568044517	-5.29747807100844	12.9107139709033	0.000147880185627572	0.00523921447935491	-0.113020615752398	-0.0475088978565051	0.015151503362273
chr10:99340475	CNNM1	-	0.60790413993179	0.69486059505315	-0.0869564551213599	-4.91935997836199	7.91189434667607	0.00120314520159832	0.0181938873267863	-0.12779739626077	-0.0461155139819497	0.0176763756878621
chr11:100048837	CNTN5	+	0.546233815165028	0.67090301660525	-0.124669201440222	-7.75120361303532	16.0502635421686	8.16538631202631e-07	0.000264544645100399	-0.158756765721092	-0.0905816371593531	0.0160838506719865
chr11:100178218	CNTN5	-	0.574887252311752	0.694191919191919	-0.119304666880167	-4.72977339721281	8.00965085807641	0.00147847967036725	0.0206077432533253	-0.177459538699102	-0.0611497950612323	0.0252241823996202
chr11:100250463	CNTN5	-	0.535877095138982	0.622416207862455	-0.0865391127234733	-3.54142301598628	9.6055961149298	0.00568814215007854	0.0466965142526313	-0.141291038773084	-0.0317871866738621	0.0244362541082578
chr11:100269113	CNTN5	+	0.571089269908088	0.652683792815372	-0.0815945229072836	-5.27212063490175	13.8787196684061	0.000121456216175209	0.00467866345129346	-0.114815770802555	-0.0483732750120126	0.0154766039242583
chr11:100326006	CNTN5	+	0.513987012245498	0.606399243879454	-0.0924122316339561	-6.16911315280735	9.96769906493603	0.000107106189194144	0.00434215334958745	-0.125804027158358	-0.0590204361095538	0.0149798243839801
chr11:100332366	CNTN5	+	0.592971868994887	0.69498433171202	-0.102012462717134	-7.63253001912564	15.2550384908605	1.37446320665633e-06	0.000352295439458387	-0.130458893310702	-0.0735660321235651	0.0133654846376641
chr11:100799727	ARHGAP42	+	0.54980146995675	0.656001185299431	-0.106199715342681	-7.25001254474506	7.85848582185459	9.63007245027042e-05	0.00409109944217132	-0.140084724401943	-0.0723147062834201	0.0146482112530491
chr11:100904467	ARHGAP42	-	0.609645444526245	0.700314930918379	-0.0906694863921345	-5.8881402898136	9.70717472317704	0.000172669751940297	0.00573562210659471	-0.125120656812135	-0.0562183159721335	0.0153986627236092
chr11:100909285	ARHGAP42	-	0.56437699884976	0.654460295788916	-0.0900832969391565	-7.82672780600045	11.1697483901596	7.32153747818613e-06	0.000912314480326885	-0.115369086644426	-0.0647975072338867	0.0115097010106948
chr11:101040639	PGR	-	0.625785255539051	0.735012854196683	-0.109227598657632	-5.89642991690707	17.4460865754812	1.58347017066177e-05	0.00141580331205641	-0.148234598159868	-0.0702205991553964	0.0185243613842403
chr11:101146128	PGR-AS1	-	0.524111765918489	0.639955669665815	-0.115843903747326	-4.43659020830959	9.72899843185558	0.00134854776747457	0.0194705154973486	-0.174243302771696	-0.0574445047229565	0.0261110218226497
chr11:10126373	SBF2	-	0.5953515566479	0.687330542264753	-0.0919789856168527	-4.19964653971396	12.9298989948813	0.00105215297153909	0.0168007669046477	-0.139320609331482	-0.0446373619022233	0.0219016016579142
chr11:101589930	TRPC6	+	0.556744984398744	0.641401197967318	-0.0846562135685738	-7.26249256946728	11.6944278073207	1.15242289575358e-05	0.00117819462481176	-0.110127634641216	-0.0591847924959315	0.0116566334159821
chr11:101589930	AP003080.1	+	0.556744984398744	0.641401197967318	-0.0846562135685738	-7.26249256946728	11.6944278073207	1.15242289575358e-05	0.00117819462481176	-0.110127634641216	-0.0591847924959315	0.0116566334159821
chr11:101656635	TRPC6	-	0.586516642844058	0.677941683919945	-0.0914250410758872	-3.79549909883931	8.43314088544299	0.00478274489510678	0.0421006486122935	-0.146478796569324	-0.0363712855824508	0.0240877520176057
chr11:101900964	ANGPTL5	-	0.661203729743646	0.752706552706553	-0.091502822962907	-5.31013592009596	15.789545830235	7.35853396291638e-05	0.00348766732463897	-0.128072067577565	-0.0549335783482486	0.017231728968861
chr11:105017526	CASP5	+	0.639136192175044	0.741543397323151	-0.102407205148108	-13.1505172224226	15.0627179604246	1.16268452486535e-09	1.09250661323678e-05	-0.118999454361903	-0.0858149559343122	0.00778731386880324
chr11:105238248	CARD18	+	0.619368973941454	0.703978919631093	-0.0846099456896391	-5.94015141467085	14.9193960896985	2.77229597582636e-05	0.00196823530627048	-0.114984041416294	-0.0542358499629838	0.0142437355183693
chr11:105262490	CARD18	+	0.593359303225327	0.675490357706709	-0.0821310544813817	-5.39642279874494	9.35932502801084	0.000380462022473788	0.00918842217907767	-0.11635959784452	-0.0479025111182433	0.0152195366346171
chr11:105446521	CARD18	+	0.508605050411773	0.591958581001358	-0.0833535305895849	-3.50461806384028	12.2181683365066	0.00423429977315744	0.0390729592440329	-0.135071785003237	-0.0316352761759326	0.023783912846197
chr11:105446611	CARD18	+	0.592910149853997	0.681557020594676	-0.0886468707406789	-8.06351524825189	17.0712618127192	3.18192295672296e-07	0.000165619883177232	-0.111833916082419	-0.0654598253989393	0.0109935763759977
chr11:105464865	CARD18	+	0.636010313216196	0.538014722797332	0.0979955904188641	4.40021077948222	10.4214441286584	0.00120898786774012	0.0182440388218899	0.0486441396167798	0.147347041220948	0.0222706582320576
chr11:105729031	GRIA4	+	0.611625384622279	0.702779600794303	-0.0911542161720241	-6.38747158002493	10.495736104062	6.39884701725757e-05	0.00320193020487123	-0.122749097342732	-0.0595593350013158	0.0142707822696361
chr11:105750399	GRIA4	+	0.590515649830287	0.683805252608866	-0.0932896027785793	-11.6674963189336	13.8818563365197	1.46737925977596e-08	3.49973151710097e-05	-0.110452339951098	-0.0761268656060607	0.00799568306931384
chr11:105901757	GRIA4	-	0.553904162588104	0.671251306165099	-0.117347143576996	-3.81484243184822	13.3928873833623	0.00204049652972014	0.0250252624553641	-0.183603923174177	-0.0510903639798144	0.0307606790249901
chr11:105901933	GRIA4	-	0.615033552495958	0.697052255788815	-0.0820187032928564	-5.31847451491438	16.99361732747	5.66628456094822e-05	0.002987993978741	-0.114556095083412	-0.0494813115023004	0.0154214715258773
chr11:106752216	GUCY1A2	+	0.60524190625418	0.696434714236572	-0.0911928079823923	-4.45536206733977	9.23575835861805	0.00148971023241979	0.0207063805295523	-0.137315328247087	-0.0450702877176972	0.0204681026152476
chr11:106897392	GUCY1A2	+	0.596020673226556	0.680356179767944	-0.0843355065413889	-5.50493368332486	17.2953157331268	3.63499574830134e-05	0.00230954459288008	-0.116615860873336	-0.0520551522094414	0.0153199859240542
chr11:106956208	GUCY1A2	-	0.583868169693507	0.673524712002973	-0.0896565423094661	-4.53351647014967	12.8274176252772	0.000580689041418662	0.0117986268461936	-0.132439318596928	-0.0468737660220041	0.019776379527856
chr11:108237615	ATM	-	0.611160000186619	0.512579365079365	0.0985806351072538	5.68202466117303	7.21486619935957	0.000672864925204494	0.0128898397212382	0.0578018225579302	0.139359447656577	0.0173495612894616
chr11:108417533	C11orf65	+	0.622815856191575	0.711352281395188	-0.0885364252036127	-5.33137691150988	12.3417687464253	0.000162640768132287	0.00553979126390659	-0.124608437515746	-0.0524644128914799	0.0166066715359163
chr11:109456772	AP003049.2	+	0.569496277531992	0.656187603246427	-0.0866913257144349	-4.32238681765664	9.9525287654942	0.00152418525786088	0.0209807777820745	-0.131408579582114	-0.0419740718467562	0.0200563552896995
chr11:109473821	AP003049.2	+	0.436465830232505	0.538890954782795	-0.10242512455029	-4.05773710465475	7.32375339903035	0.00438630658694134	0.0399366646685379	-0.161582069991164	-0.0432681791094173	0.0252419321184696
chr11:109912655	RDX	+	0.619650826142423	0.709935666185666	-0.0902848400432434	-8.14303550926548	17.983068067966	1.91526246951378e-07	0.000124845764479748	-0.113580110275987	-0.0669895698104997	0.0110873690702335
chr11:109924616	RDX	+	0.584237144434513	0.666362679466128	-0.0821255350316148	-5.44736101840934	8.27032592718246	0.000544954761690811	0.0113507040930898	-0.116694518014895	-0.047556552048335	0.0150762056625349
chr11:110006984	RDX	+	0.651835606037287	0.732719397681035	-0.0808837916437478	-5.24418730778987	12.849086197565	0.000164670999398937	0.00558143763432448	-0.114244091818769	-0.0475234914687264	0.0154235131006096
chr11:110382875	LINC02732	-	0.624174849477644	0.821641059169663	-0.197466209692019	-10.4786694125474	17.487357969738	5.82527292274833e-09	2.335520715252e-05	-0.237140576467185	-0.157791842916853	0.0188445881741023
chr11:11059458	LINC02752	-	0.625471867068506	0.717750853664166	-0.0922789865956606	-7.50196786621729	17.5707273728706	7.03804553004181e-07	0.000243684556309669	-0.118166997220241	-0.0663909759710797	0.0123006374115796
chr11:11111068	LINC02752	+	0.659999035943747	0.768955601564297	-0.10895656562055	-7.9570467973092	11.0579501887142	6.65358974214519e-06	0.000862418405161393	-0.139075596879498	-0.0788375343616028	0.0136930909665374
chr11:111482298	BTG4	+	0.606105863397991	0.69450937950938	-0.0884035161113887	-4.2913438724194	11.6061293470164	0.00112913885049102	0.0175154409366271	-0.133457513254116	-0.043349518968662	0.02060042698502
chr11:111485502	BTG4	+	0.642059081542731	0.729196187272563	-0.0871371057298319	-4.84434921132493	5.68685821066481	0.00332132600302383	0.0337282887796638	-0.131744824562136	-0.0425293868975275	0.017987370837372
chr11:113262745	NCAM1	-	0.40118707498632	0.492930938457254	-0.0917438634709338	-4.30403442194777	15.7746314509766	0.000562728763630079	0.0115798403807203	-0.136983829732127	-0.0465038972097405	0.0213157829321949
chr11:11368626	GALNT18	-	0.572576989689537	0.439984085623618	0.132592904065919	3.49311852945635	11.4242595124113	0.00476182587949782	0.0419866922137183	0.0494241925138141	0.215761615618023	0.0379583180323842
chr11:115389273	CADM1	+	0.504385787153368	0.608859242525304	-0.104473455371936	-4.78187191496466	9.26265227470183	0.000921437569088391	0.0155341790678442	-0.153683840091278	-0.055263070652595	0.0218478155060974
chr11:115795613	LINC02698	+	0.606191856093064	0.709389461969441	-0.103197605876378	-4.88708901896175	13.314336095743	0.000277140598023148	0.00759338766351107	-0.148707520766467	-0.0576876909862884	0.0211163753056214
chr11:116892317	SIK3	+	0.525158563729536	0.39113165937939	0.134026904350145	3.63977723367132	12.7224375528064	0.00309587013643154	0.0322796016862827	0.0542992291065726	0.213754579593718	0.036822831658562
chr11:116942722	SIK3	+	0.629639502747088	0.744712296943534	-0.115072794196446	-6.31297478099931	14.3927919045684	1.68416590352373e-05	0.00146771668124406	-0.154068068665926	-0.0760775197269662	0.0182279825578887
chr11:118048797	SMIM35	+	0.589728555608214	0.677046029813478	-0.0873174742052647	-6.47965956852246	10.349583935046	6.04110441067185e-05	0.00309887664351878	-0.117206135857457	-0.0574288125530721	0.0134756268106189
chr11:118891991	CXCR5	+	0.386545711022453	0.274510921177588	0.112034789844865	4.8518097956476	16.8577302554045	0.000153055622702758	0.00534051703359869	0.0632849817227732	0.160784597966957	0.0230913400491025
chr11:119609380	AP003393.1	-	0.568706605449197	0.659628237259816	-0.090921631810619	-7.27257249115551	11.456738496329	1.27505013221606e-05	0.00124528719729589	-0.118305077640272	-0.0635381859809654	0.0125019904471482
chr11:120768379	GRIK4	-	0.319869546375954	0.400942261501781	-0.0810727151258269	-4.85468968745485	16.937869108278	0.000150172026175265	0.0052843284142115	-0.116316221169873	-0.0458292090817808	0.0166998758613407
chr11:121677727	AP001977.1	-	0.600170476729521	0.690625264852954	-0.0904547881234322	-7.61351253720166	11.9467365032947	6.38721062696433e-06	0.000843067596475491	-0.116353681704442	-0.0645558945424221	0.0118808221148183
chr11:121877919	AP001977.1	+	0.624286089558285	0.708184181287082	-0.0838980917287969	-4.46980842877014	7.06017393824745	0.00284083395507182	0.0306371454536259	-0.12820540649961	-0.0395907769579839	0.0187699524634619
chr11:122092309	MIR100HG	+	0.519918987913147	0.632926791361935	-0.113007803448788	-4.39526294153572	16.5229355235983	0.000420652549277272	0.00974865874964752	-0.167373402666603	-0.0586422042309724	0.0257112725568365
chr11:122461260	MIR100HG	+	0.556015029656334	0.663256237583045	-0.107241207926711	-6.99816899841551	16.9627714263627	2.17187466225529e-06	0.000456252092081129	-0.13957780973175	-0.0749046061216713	0.0153241809323256
chr11:122464145	MIR100HG	+	0.635103317395335	0.722844711862397	-0.0877413944670619	-9.47276034978845	17.6231251124428	2.46943723638862e-08	4.60984482618805e-05	-0.107231046657308	-0.0682517422768161	0.00926249490403517
chr11:122838085	AP002762.2	+	0.594374727562476	0.674537028756978	-0.0801623011945013	-4.05839588551181	16.017981768265	0.000910977000236572	0.0154326760512312	-0.122031302834109	-0.0382932995548931	0.0197522133019785
chr11:122938274	JHY	-	0.597485715477052	0.687603025548257	-0.0901173100712049	-7.07062255092859	16.3605128248009	2.33479206582483e-06	0.000475884170816957	-0.117087863311808	-0.063146756830602	0.0127453147756232
chr11:123649861	SCN3B	-	0.634699921278418	0.717209618653371	-0.0825096973749527	-4.86359426021245	7.48864780508462	0.00150936239483528	0.0208591090380893	-0.122100390652217	-0.0429190040976883	0.0169647575353764
chr11:124573464	OR8A1	+	0.551562592540769	0.664204400392955	-0.112641807852186	-7.69365664193075	11.1162586928149	8.87562892729834e-06	0.00101404493721924	-0.14482506966913	-0.0804585460352426	0.0146408675477254
chr11:124691265	SPA17	-	0.586434745042662	0.668856837606838	-0.0824220925641757	-3.95096445419401	9.34043390289492	0.00311414790570058	0.0323940702799297	-0.129352646154194	-0.035491538974157	0.0208612589456945
chr11:124691265	SIAE	-	0.586434745042662	0.668856837606838	-0.0824220925641757	-3.95096445419401	9.34043390289492	0.00311414790570058	0.0323940702799297	-0.129352646154194	-0.035491538974157	0.0208612589456945
chr11:127153881	AP001993.1	-	0.58677277431556	0.705738806282285	-0.118966031966724	-6.45683190123644	5.86785659478067	0.000714750615093844	0.013350090004546	-0.164297222658693	-0.0736348412747558	0.0184248302861877
chr11:127289634	LINC02712	+	0.639170811693853	0.735441207967445	-0.0962703962735917	-4.98003167225745	6.68905018722432	0.00182802916680073	0.0234479997294305	-0.142415928148973	-0.0501248643982107	0.0193312819293682
chr11:128165896	LINC02725	-	0.476883723321429	0.396174276982596	0.0807094463388331	4.0441247966935	16.1809688660923	0.000921496247639538	0.0155347971594506	0.0384404749901744	0.122978417687492	0.0199572096303313
chr11:129169413	ARHGAP32	+	0.644898987812522	0.765453805453805	-0.120554817641284	-11.4136620369933	13.2779520393571	3.06605376271442e-08	5.07867334942016e-05	-0.143324873916264	-0.097784761366304	0.0105623258556762
chr11:12928067	TEAD1	-	0.601397817528214	0.699379324379324	-0.0979815068511107	-8.28197231480312	10.157809292859	7.85764141466221e-06	0.00094892855737809	-0.124286537185934	-0.0716764765162879	0.0118306972212379
chr11:129852135	TMEM45B	-	0.617292804845326	0.744528619528619	-0.127235814683294	-9.38925687377634	17.6453369761557	2.78532831193272e-08	4.78763767265155e-05	-0.155746928545946	-0.0987247008206412	0.0135512124541673
chr11:130901600	SNX19	+	0.525187425855536	0.607494357494358	-0.0823069316388212	-4.45140176984676	13.9575059342326	0.000551852245218312	0.0114480746451455	-0.121975614829432	-0.0426382484482105	0.0184901152253562
chr11:132505837	OPCML	+	0.549901904081471	0.631538826511653	-0.0816369224301819	-4.07589482149506	10.5092669805286	0.00201224424199262	0.0248203666313547	-0.12597335693017	-0.037300487930194	0.0200292024219205
chr11:132647080	OPCML	+	0.611738928114065	0.702962962962963	-0.0912240348488979	-3.89699113008252	8.94256498489733	0.00368094512038753	0.0358850519671976	-0.144230395826301	-0.0382176738714947	0.023408838204609
chr11:133396470	OPCML	-	0.613780350997194	0.727934633044675	-0.11415428204748	-4.90158941383492	7.17320958781109	0.00163167849149852	0.0218960474709138	-0.168956154149374	-0.0593524099455868	0.0232892379205153
chr11:13425514	BTBD10	+	0.662469553604635	0.757359512622671	-0.0948899590180359	-7.48446176951453	14.2364728217152	2.6630438796776e-06	0.000514268464158813	-0.12203981106038	-0.0677401069756919	0.0126782609010762
chr11:134305956	GLB1L3	+	0.606251479446355	0.690379344459041	-0.0841278650126855	-6.5409657651947	9.9331872085349	6.75422090390824e-05	0.00330537115439995	-0.11281164263766	-0.0554440873877111	0.0128616886301929
chr11:134966259	AP003062.2	+	0.597722992532999	0.787992424242424	-0.190269431709425	-4.60866493915036	16.4473618854552	0.000271468508108082	0.00750235697798326	-0.277596970004045	-0.102941893414806	0.0412851518219727
chr11:15693660	AC087379.2	+	0.495563402999653	0.350105580693816	0.145457822305837	3.66612385607832	13.8921339012288	0.00257231241309849	0.0287948738755117	0.0602988308017356	0.230616813809939	0.0396761888076074
chr11:16230045	SOX6	+	0.610097584691118	0.691143989048148	-0.0810464043570307	-5.36912477903454	15.577414115107	6.86489287525969e-05	0.00333859721953218	-0.113116861403475	-0.0489759473105861	0.0150949005084594
chr11:16436149	SOX6	-	0.615370900777993	0.698430055782997	-0.0830591550050043	-5.03551886155685	16.6422835230441	0.000108356047176582	0.00437338096147386	-0.11791690743352	-0.0482014025764887	0.0164946567153409
chr11:16446057	SOX6	+	0.524274185958969	0.61013986013986	-0.0858656741808916	-4.26222345290589	9.51463491567796	0.00185458959194444	0.02364085784218	-0.131065522065941	-0.0406658262958423	0.0201457467281192
chr11:16446592	SOX6	-	0.640371671303781	0.727546296296296	-0.0871746249925153	-4.73390362026851	10.5550115098822	0.000689234279405796	0.0130664901735179	-0.127915125068426	-0.0464341249166045	0.0184149556022374
chr11:16467009	SOX6	+	0.638347469877634	0.756222943722944	-0.117875473845309	-4.19535531313224	9.09055905662727	0.00227182577548035	0.0267064235678052	-0.181338149170941	-0.0544127985196777	0.0280966604845928
chr11:16547609	SOX6	+	0.63381545572948	0.717960205503309	-0.084144749773829	-7.10889662234003	8.84528238669977	6.1278135755195e-05	0.00312427726326713	-0.110992431239627	-0.0572970683080312	0.0118365414837234
chr11:16593006	SOX6	+	0.647707568121102	0.799990628280102	-0.152283060159	-11.1375018609841	17.0841784479863	2.9577586032586e-09	1.7107360590249e-05	-0.181119744168839	-0.123446376149161	0.013672999749833
chr11:1742562	IFITM10	+	0.600587203533451	0.708849260951944	-0.108262057418493	-8.09980081927909	17.4026520203566	2.61075436952605e-07	0.000148297093445189	-0.136412262678683	-0.0801118521583038	0.0133660147741916
chr11:1742562	AC068580.4	+	0.600587203533451	0.708849260951944	-0.108262057418493	-8.09980081927909	17.4026520203566	2.61075436952605e-07	0.000148297093445189	-0.136412262678683	-0.0801118521583038	0.0133660147741916
chr11:18165577	AC090099.1	+	0.506603515052775	0.607741004944952	-0.101137489892177	-6.45878634397655	12.2095553140048	2.87552240979791e-05	0.00200659538729999	-0.135190469953088	-0.0670845098312654	0.0156589000635541
chr11:18182347	AC090099.1	+	0.619464158024968	0.728884474443685	-0.109420316418717	-6.94942960191607	11.0770877047239	2.33871331728463e-05	0.001777933604441	-0.144045916156515	-0.0747947166809188	0.0157452226566261
chr11:20600477	SLC6A5	+	0.39394227184828	0.522460276943921	-0.128518005095641	-6.4750922103056	16.5345226805203	6.53321491240859e-06	0.000853873884926363	-0.170483729734751	-0.0865522804565309	0.0198480578996381
chr11:20793303	NELL1	-	0.568352531602461	0.65512201350911	-0.0867694819066489	-5.94779800877411	11.1565124660207	9.08337115490138e-05	0.00394603497191949	-0.118823692783148	-0.05471527103015	0.0145885051541172
chr11:21919209	ANO5	+	0.651723533032208	0.741861618210503	-0.0901380851782942	-6.47004268201144	12.4591759326316	2.5693466570654e-05	0.00188346242297771	-0.120368836499345	-0.0599073338572434	0.0139316059581653
chr11:22081352	AC116534.1	-	0.567726524421571	0.663071895424837	-0.0953453710032657	-3.8688249754297	9.25055861313906	0.00360399543467587	0.035447434851449	-0.150865834843595	-0.0398249071629369	0.024644529439504
chr11:22081352	ANO5	-	0.567726524421571	0.663071895424837	-0.0953453710032657	-3.8688249754297	9.25055861313906	0.00360399543467587	0.035447434851449	-0.150865834843595	-0.0398249071629369	0.024644529439504
chr11:22264538	ANO5	+	0.572924383969165	0.655367330174753	-0.0824429462055883	-5.39367672143448	11.88217299299	0.000167371063564152	0.00563766213239232	-0.115783005904019	-0.0491028865071574	0.0152851107812895
chr11:22278294	ANO5	-	0.574632883240817	0.656857936929836	-0.0822250536890189	-6.22962344391854	15.7510789425034	1.29295744643412e-05	0.00125599673418852	-0.110241751252394	-0.0542083561256439	0.0131990407492909
chr11:22329210	AC104009.1	+	0.615319286222648	0.710832004253057	-0.0955127180304094	-6.482936948945	7.50580468720255	0.000252400424837754	0.00718515907364554	-0.129880271077489	-0.0611451649833296	0.0147329395276554
chr11:22329584	AC104009.1	+	0.658924565409528	0.745128777909098	-0.0862042124995704	-5.532467064811	10.1026228917984	0.000241135576601799	0.00698793424278042	-0.120874245156408	-0.0515341798427333	0.0155815139050476
chr11:22493231	AC055878.1	-	0.559659895786898	0.647261108867651	-0.0876012130807526	-4.78235422637714	9.47717989503444	0.000863637632919624	0.0149431842750537	-0.128722615774454	-0.0464798103870516	0.018317591908518
chr11:23754643	LINC02726	-	0.575865523737722	0.661970969744215	-0.0861054460064929	-6.20300212034946	16.0873878745154	1.23496617137289e-05	0.00122289552952106	-0.115519403199844	-0.0566914888131417	0.0138812536794106
chr11:24606737	LUZP2	-	0.510767139126465	0.593175161802613	-0.0824080226761474	-6.19710802038571	14.5673794015681	1.94744730967783e-05	0.00159698744971053	-0.110825143607224	-0.0539909017450712	0.013297819306209
chr11:24702338	LUZP2	+	0.534513077766352	0.618446852425181	-0.083933774658829	-4.45673165383735	11.4126758909231	0.000884877101124353	0.0151520360419297	-0.125202863087682	-0.0426646862299763	0.0188330330785252
chr11:24757587	LUZP2	+	0.58244513492729	0.66428084063787	-0.0818357057105804	-6.81892621738041	14.2091636265827	7.71622551406885e-06	0.000938441708138568	-0.107540346176501	-0.0561310652446594	0.0120012598907426
chr11:24883238	LUZP2	+	0.306579106207178	0.462351551692637	-0.155772445485459	-3.81851949487071	10.9225042969424	0.00288647289894239	0.0309308474418407	-0.245637080747636	-0.0659078102232816	0.0407939374657385
chr11:24947819	LUZP2	-	0.349205226803214	0.530487081670726	-0.181281854867512	-4.37183933109797	11.1026563644233	0.00109010185315581	0.0171657410267925	-0.272444635601427	-0.0901190741335975	0.0414658090424343
chr11:25073646	LUZP2	-	0.501896642633076	0.587730587730588	-0.0858339450975117	-3.98886401442053	8.08229970418346	0.0039293186527461	0.0373362522896029	-0.135367635705433	-0.0363002544895907	0.0215183934040381
chr11:25739786	LINC02699	+	0.600057378023673	0.680219066183978	-0.0801616881603052	-3.57364513273505	14.6573854356018	0.00286231705609625	0.0307750378053399	-0.128070503397552	-0.0322528729230586	0.0224313509548035
chr11:27070590	BBOX1	-	0.635571247269611	0.738639158747854	-0.103067911478244	-5.19108518999156	8.38822561308593	0.000715055872933665	0.0133537857720994	-0.148486903202582	-0.0576489197539052	0.0198547909937905
chr11:27070590	BBOX1-AS1	-	0.635571247269611	0.738639158747854	-0.103067911478244	-5.19108518999156	8.38822561308593	0.000715055872933665	0.0133537857720994	-0.148486903202582	-0.0576489197539052	0.0198547909937905
chr11:27141797	BBOX1-AS1	+	0.654191815965313	0.8155988392823	-0.161407023316987	-9.61210126326118	15.8758021902392	5.09016126429755e-08	6.38855947865796e-05	-0.197027256086228	-0.125786790547746	0.0167920643880342
chr11:27764482	AC103796.1	-	0.557688491768711	0.645164757244485	-0.0874762654757734	-6.66449817796647	12.7288924797415	1.72518664846878e-05	0.00148926882324724	-0.115894152318408	-0.0590583786331386	0.0131257092641992
chr11:27844508	AC103796.1	-	0.646944108891256	0.727782021899669	-0.0808379130084128	-6.90161687304944	14.6432024610831	5.74443019445708e-06	0.000793708831068283	-0.105856444072545	-0.0558193819442806	0.0117128948904831
chr11:28970585	LINC02742	-	0.495028250734772	0.579372525192959	-0.0843442744581862	-5.82935654949501	10.3041174446433	0.00014780210043259	0.00523833976370747	-0.116454443647524	-0.0522341052688481	0.0144688824130157
chr11:29063607	LINC02742	+	0.608714536539253	0.709854497354497	-0.101139960815244	-8.58937186449086	15.3933740031995	2.92134850621089e-07	0.000157479431106197	-0.126182059710621	-0.0760978619198673	0.0117750124701626
chr11:29246045	AC090791.1	+	0.543847703282185	0.634371770758514	-0.0905240674763291	-4.0065027174305	16.3652422667531	0.000977821923953604	0.0160787028012258	-0.138335080671183	-0.0427130542814757	0.0225942858050487
chr11:29372798	LINC02755	-	0.351790376419045	0.216555149994733	0.135235226424311	5.88260718315131	10.0496796395105	0.000151632036582724	0.00531608645769615	0.0840468558560621	0.186423596992561	0.022988994881665
chr11:29418713	LINC02755	+	0.614122028932852	0.700802177927003	-0.0866801489941509	-3.43761211067542	12.1366197427258	0.00484054438151348	0.0423918949661867	-0.141550883421314	-0.0318094145669877	0.0252152209741663
chr11:29540664	AC110058.1	+	0.569337903567139	0.673787581927117	-0.104449678359978	-4.42388117788716	8.17965466050304	0.00209813760214355	0.025444539851854	-0.158687948497304	-0.0502114082226518	0.0236104167720578
chr11:29540664	LINC02755	+	0.569337903567139	0.673787581927117	-0.104449678359978	-4.42388117788716	8.17965466050304	0.00209813760214355	0.025444539851854	-0.158687948497304	-0.0502114082226518	0.0236104167720578
chr11:29598348	LINC02546	+	0.660149032325139	0.743273046398046	-0.0831240140729078	-7.79251230404373	8.15519479973787	4.7446848676933e-05	0.00270166553450056	-0.107641296681803	-0.0586067314640128	0.0106671649436822
chr11:29598348	LINC02755	+	0.660149032325139	0.743273046398046	-0.0831240140729078	-7.79251230404373	8.15519479973787	4.7446848676933e-05	0.00270166553450056	-0.107641296681803	-0.0586067314640128	0.0106671649436822
chr11:29794407	LINC02755	+	0.63284152144588	0.730345471521942	-0.0975039500760622	-4.29358773645836	6.17586984237241	0.004799439789797	0.0421797299332853	-0.152690034202627	-0.0423178659494973	0.0227092017354442
chr11:29794407	AC107973.1	+	0.63284152144588	0.730345471521942	-0.0975039500760622	-4.29358773645836	6.17586984237241	0.004799439789797	0.0421797299332853	-0.152690034202627	-0.0423178659494973	0.0227092017354442
chr11:29840579	AC107973.1	-	0.539951178606641	0.645236299648064	-0.105285121041424	-3.57709575673217	17.9455146248546	0.0021626488949316	0.025921769389015	-0.167135290857341	-0.0434349512255059	0.0294331290526049
chr11:29840579	LINC02755	-	0.539951178606641	0.645236299648064	-0.105285121041424	-3.57709575673217	17.9455146248546	0.0021626488949316	0.025921769389015	-0.167135290857341	-0.0434349512255059	0.0294331290526049
chr11:30476718	MPPED2	-	0.573804494729634	0.659144299495177	-0.085339804765543	-3.94718984131077	9.0894356167473	0.00330421960163109	0.0336194053321743	-0.134175277322812	-0.0365043322082742	0.0216203953183067
chr11:30776480	AL122014.1	-	0.587237725254225	0.672730736102829	-0.0854930108486045	-5.99436165693975	7.93758522068311	0.000335578805692172	0.00852102871670544	-0.11842685909532	-0.0525591626018892	0.0142622377062665
chr11:30812576	AL122014.1	-	0.652666204067353	0.7357876943881	-0.0831214903207473	-5.03334468277676	15.4662970576542	0.000135429824658944	0.00497548678547161	-0.118228397562696	-0.0480145830787984	0.0165141661379112
chr11:30950799	DCDC1	+	0.518506359871198	0.614036002360811	-0.0955296424896124	-4.24840192948331	8.72648739956064	0.00230292659852752	0.0269173214018646	-0.14664061950272	-0.0444186654765053	0.0224860180546125
chr11:31399571	DNAJC24	-	0.650978743166574	0.732265264610802	-0.0812865214442287	-7.00640567645811	17.6238503638487	1.72746142412335e-06	0.000402428934305474	-0.105698223216714	-0.0568748196717434	0.0116017434898689
chr11:31868399	AL035078.4	-	0.672457927822446	0.758459221307519	-0.0860012934850729	-7.08602661184019	12.7347129957106	9.20369513465511e-06	0.00103579735507853	-0.112276767505559	-0.0597258194645871	0.0121367443556268
chr11:31868399	PAUPAR	-	0.672457927822446	0.758459221307519	-0.0860012934850729	-7.08602661184019	12.7347129957106	9.20369513465511e-06	0.00103579735507853	-0.112276767505559	-0.0597258194645871	0.0121367443556268
chr11:32241550	THEM7P	+	0.533381761795627	0.65207708957709	-0.118695327781462	-4.96567058539473	6.91932942770145	0.00168301168926965	0.0222952621427751	-0.175351232505547	-0.0620394230573779	0.023903182005382
chr11:32275821	THEM7P	-	0.638049191248406	0.722177749151433	-0.0841285579030276	-5.69508924641699	8.39032097566279	0.000383814945848254	0.00923564696837429	-0.117919257679567	-0.0503378581264879	0.0147721228347662
chr11:32689863	CCDC73	+	0.694025504778731	0.509924132912639	0.184101371866092	4.80851281505878	17.6943280134696	0.00014729520240831	0.0052282986839567	0.103564593898075	0.264638149834109	0.0382865511535174
chr11:32946213	QSER1	-	0.433296343527848	0.257728554704129	0.175567788823719	9.256668037716	16.560714993585	5.93737725730432e-08	6.91356633821441e-05	0.135470688754576	0.215664888892862	0.0189666290406411
chr11:33549897	KIAA1549L	+	0.654527674706246	0.738398032613719	-0.0838703579074727	-6.07027769114466	12.9857201133141	3.98522103618705e-05	0.00243430699954107	-0.11372255873737	-0.0540181570775754	0.0138165603247151
chr11:34466775	CAT	+	0.624394560469675	0.748569519763692	-0.124174959294017	-6.2947203469839	6.42439214535386	0.000572942620951595	0.0117056872804589	-0.171682295357517	-0.0766676232305182	0.0197268428856439
chr11:3544924	AC127526.2	+	0.556622979959614	0.684911178719228	-0.128288198759614	-6.65913737053914	7.44420856930944	0.000219873625561976	0.0066282956351518	-0.173297354097489	-0.0832790434217383	0.0192649875834034
chr11:40314453	LRRC4C	+	0.555193114541854	0.660205035730982	-0.105011921189128	-4.70644002685826	13.9569099417165	0.000339819459148096	0.00858318731631767	-0.152881101098724	-0.0571427412795332	0.0223123891072353
chr11:40364268	LRRC4C	+	0.49974849676396	0.598977314335331	-0.0992288175713715	-6.6209525406976	10.8982080516488	3.92763691832796e-05	0.00241375899395955	-0.132252811409449	-0.0662048237332937	0.0149870908999019
chr11:40373253	LRRC4C	+	0.610576201404375	0.731436741363212	-0.120860539958837	-5.77557532245943	10.9875541450293	0.000124182780096018	0.00473279589700533	-0.166925045628893	-0.0747960342887812	0.0209261473032562
chr11:40595702	LRRC4C	-	0.573760948373952	0.664746991914175	-0.0909860435402231	-3.4103563802429	11.878310615579	0.00524134227940778	0.0444293229461572	-0.149181439868112	-0.0327906472123339	0.0266793359390031
chr11:41701170	LINC02741	+	0.586810637557205	0.680211558307534	-0.0934009207503285	-5.4572423532115	8.64416998824025	0.000462241550416941	0.0103177115879055	-0.132362142266812	-0.0544396992338451	0.0171150399240311
chr11:41824442	LINC01499	+	0.597915788444965	0.681235431235431	-0.0833196427904666	-7.30946716999218	10.825111024051	1.66612786911645e-05	0.00145685023410655	-0.108457921023491	-0.0581813645574423	0.0113988668192562
chr11:42031515	LINC02745	+	0.538509093664922	0.627958482243472	-0.0894493885785502	-4.2774257927388	7.17254685359846	0.00346726755524806	0.0346341459945566	-0.138658204985024	-0.0402405721720766	0.0209119673637345
chr11:42133245	LINC02745	+	0.597718213109204	0.6897108739214	-0.0919926608121963	-5.92051961857607	13.9320110904766	3.80856966954122e-05	0.00236864098251958	-0.125333485090387	-0.0586518365340057	0.0155379369951858
chr11:43386265	TTC17	+	0.585804575418684	0.679960424805374	-0.0941558493866894	-4.89505357594942	11.1473085778555	0.000457270803293592	0.0102498819339922	-0.136423414379087	-0.0518882843942917	0.0192348966003763
chr11:43600503	AC068205.1	-	0.581810738342693	0.721549351549352	-0.139738613206658	-8.49398810754115	17.4773752603959	1.2950047105411e-07	0.00010264738180405	-0.174376107670574	-0.105101118742742	0.0164514726695456
chr11:43600503	AC068205.2	-	0.581810738342693	0.721549351549352	-0.139738613206658	-8.49398810754115	17.4773752603959	1.2950047105411e-07	0.00010264738180405	-0.174376107670574	-0.105101118742742	0.0164514726695456
chr11:43614456	AC068205.2	-	0.625611455593156	0.705850697662008	-0.0802392420688519	-7.05257955845794	15.8428063223592	2.88826572337498e-06	0.000534223167421679	-0.104377483063369	-0.0561010010743344	0.0113772898843266
chr11:43614456	AC068205.1	-	0.625611455593156	0.705850697662008	-0.0802392420688519	-7.05257955845794	15.8428063223592	2.88826572337498e-06	0.000534223167421679	-0.104377483063369	-0.0561010010743344	0.0113772898843266
chr11:43658158	AC068205.1	-	0.456454415990249	0.688662464985994	-0.232208048995745	-4.1108031966605	8.58050834943119	0.00291569337452639	0.0311177956400612	-0.360949792708247	-0.103466305283243	0.056487269734631
chr11:43658158	AC068205.2	-	0.456454415990249	0.688662464985994	-0.232208048995745	-4.1108031966605	8.58050834943119	0.00291569337452639	0.0311177956400612	-0.360949792708247	-0.103466305283243	0.056487269734631
chr11:45016620	AC068858.1	-	0.538442160222685	0.624773082999852	-0.0863309227771673	-6.59407040313778	9.78270424315603	6.78858751540388e-05	0.00331575064126256	-0.115590242669895	-0.0570716028844393	0.0130922051933335
chr11:45116598	PRDM11	+	0.569330173794459	0.653932690116901	-0.0846025163224412	-5.08545908527854	12.0661316477983	0.000263645683642383	0.00737382023181959	-0.120827576265664	-0.0483774563792181	0.0166361610434247
chr11:4758281	MMP26	+	0.528272280022879	0.622959910459911	-0.0946876304370315	-6.15129321754229	11.459119587209	6.03021335630741e-05	0.00309554023110576	-0.128402790408323	-0.0609724704657397	0.0153931258173486
chr11:4779360	MMP26	-	0.600371815739679	0.699631195709107	-0.0992593799694281	-4.52785262872626	12.6688585211099	0.000605008151611645	0.0121000772933077	-0.146745027577453	-0.0517737323614038	0.0219219546457171
chr11:49321668	AC118942.1	+	0.60157711731431	0.701623588148089	-0.100046470833779	-4.78760362125086	6.88178776242251	0.00209046610038369	0.0253835470005567	-0.14963257273361	-0.0504603689339469	0.0208969828641828
chr11:49583868	AC136759.1	-	0.592009671001268	0.67941100079258	-0.0874013297913121	-4.83754586699377	11.2629890616423	0.000487099476601333	0.0106499699520503	-0.127054167451312	-0.0477484921313118	0.018067287048924
chr11:49661943	AC136759.1	-	0.606081122527049	0.702565780018487	-0.0964846574914388	-8.33996321671376	16.554722275375	2.50724900284708e-07	0.00014549363899046	-0.120943125666565	-0.0720261893163122	0.0115689548004334
chr11:5263482	HBG2	+	0.607625375740216	0.712234862307206	-0.104609486566989	-7.21503097354612	9.70353920168659	3.37264941724532e-05	0.0022127935579153	-0.13704917249508	-0.072169800638899	0.0144988270945114
chr11:5263482	AC104389.5	+	0.607625375740216	0.712234862307206	-0.104609486566989	-7.21503097354612	9.70353920168659	3.37264941724532e-05	0.0022127935579153	-0.13704917249508	-0.072169800638899	0.0144988270945114
chr11:56811112	OR5G5P	-	0.507191133989371	0.589994979826677	-0.0828038458373062	-6.57390397290249	10.7624599274487	4.44134693159198e-05	0.00259826309282813	-0.110601940656839	-0.0550057510177736	0.0125958404897032
chr11:5829125	TRIM5	+	0.637246760719667	0.745703933747412	-0.108457173027745	-8.48271414322108	10.2956583082877	5.7983858995411e-06	0.000797416494683821	-0.136834915658481	-0.0800794303970087	0.0127856687372187
chr11:58796770	TMA16P1	-	0.632500247222073	0.71725891396755	-0.0847586667454767	-3.97678750709234	7.62809297738112	0.00449163793354597	0.0405315407685681	-0.134327580183133	-0.0351897533078208	0.021313350686783
chr11:58876185	GLYATL2	-	0.505436020026699	0.590018143769897	-0.0845821237431976	-5.0287967251269	17.2376745343723	9.90390005035733e-05	0.00416380988562553	-0.12003104776941	-0.0491331997169851	0.0168195551274869
chr11:60438620	MS4A5	+	0.600453198745124	0.689335510168844	-0.0888823114237194	-6.04284374572543	6.78566436510342	0.000585393557916578	0.0118556392641199	-0.123886784326389	-0.0538778385210499	0.0147086893462358
chr11:60538261	MS4A13	+	0.618419415509968	0.711324555074555	-0.0929051395645871	-6.31042415638148	9.9038293782041	9.17154170204667e-05	0.00396870106636641	-0.125752114337531	-0.0600581647916436	0.0147224873102446
chr11:62978159	SLC22A6	-	0.611603167930567	0.70658084605453	-0.0949776781239628	-4.61298427481271	10.8620953929799	0.000773943848256547	0.0140081533720953	-0.140364505974693	-0.0495908502732323	0.0205892048326609
chr11:63190379	SLC22A25	-	0.559958078320246	0.656683267603735	-0.0967251892834891	-7.10400297888697	9.47745495641649	4.33174436381608e-05	0.00255784487352303	-0.127290877652947	-0.0661595009140307	0.0136155896289677
chr11:63190379	SLC22A10	-	0.559958078320246	0.656683267603735	-0.0967251892834891	-7.10400297888697	9.47745495641649	4.33174436381608e-05	0.00255784487352303	-0.127290877652947	-0.0661595009140307	0.0136155896289677
chr11:63194007	SLC22A10	+	0.614659663399159	0.735528701318175	-0.120869037919016	-5.70157820794928	10.464197619462	0.000166673731829974	0.00562273838312586	-0.167821365515056	-0.0739167103229751	0.0211992247603474
chr11:63194007	SLC22A25	+	0.614659663399159	0.735528701318175	-0.120869037919016	-5.70157820794928	10.464197619462	0.000166673731829974	0.00562273838312586	-0.167821365515056	-0.0739167103229751	0.0211992247603474
chr11:63226091	SLC22A25	-	0.611484740361373	0.69350129037629	-0.0820165500149169	-5.06208469660719	17.4356662407154	8.92443993311252e-05	0.00390270028024408	-0.116135104547478	-0.0478979954823561	0.0162021291484687
chr11:63226091	SLC22A10	-	0.611484740361373	0.69350129037629	-0.0820165500149169	-5.06208469660719	17.4356662407154	8.92443993311252e-05	0.00390270028024408	-0.116135104547478	-0.0478979954823561	0.0162021291484687
chr11:63332843	SLC22A10	-	0.48490703752931	0.569098361972906	-0.0841913244435963	-6.45058182185604	10.036916991972	7.22013614719474e-05	0.00344428121297036	-0.113257923810232	-0.0551247250769601	0.0130517411868704
chr11:63857149	MARK2	-	0.537890001458329	0.649951539381824	-0.112061537923495	-6.5565466007666	15.08501231305	8.84347583056795e-06	0.00101220860789989	-0.148473439387776	-0.0756496364592138	0.0170915490649289
chr11:6526443	DNHD1	-	0.590064682020621	0.506187678062678	0.0838770039579425	5.72156593320367	11.3640740481686	0.000118146989426942	0.00460447646549653	0.0517366774341379	0.116017330481747	0.0146597985476639
chr11:66171619	PACS1	-	0.33545849004373	0.170151689708141	0.165306800335589	3.62095467099162	13.0667152633761	0.00308108650342282	0.0321846618905741	0.066731038166451	0.263882562504727	0.0456528223509406
chr11:6726372	GVINP1	+	0.655554409649834	0.744338602262009	-0.0887841926121751	-8.58042483181072	17.0557061460786	1.35394943667991e-07	0.000105103862568936	-0.110609647890304	-0.066958737334046	0.0103472956587208
chr11:67767304	OR7E11P	-	0.582213485841813	0.663055286217051	-0.0808418003752382	-3.77727000231124	7.90301667803181	0.0055313463125382	0.0459076175915114	-0.130300929196463	-0.0313826715540131	0.0214021767905849
chr11:6901918	AC087280.2	+	0.533962802781588	0.649875568249628	-0.11591276546804	-3.46534548916741	17.4597639338282	0.00286381485696449	0.0307849946739914	-0.186342948640247	-0.0454825822958335	0.0334491224122907
chr11:71409979	AP002387.1	-	0.567866942098477	0.652128478953606	-0.0842615368551295	-5.28579902391164	13.3018679406761	0.000136542834605828	0.00499582096324191	-0.118620947363812	-0.0499021263464468	0.0159411162766407
chr11:71675087	AP003498.1	-	0.564620817042312	0.652597402597403	-0.0879765855550907	-7.69849181606816	17.9054846367834	4.36553564413962e-07	0.000190270212739497	-0.111994524502414	-0.063958646607767	0.0114277689263068
chr11:71724949	ENPP7P8	+	0.617519696227498	0.71264339299427	-0.0951236967667718	-5.46543872737719	9.40820176175219	0.000340506288213612	0.00859346046794035	-0.134236737079649	-0.0560106564538948	0.0174045857087891
chr11:71724949	AP003498.1	+	0.617519696227498	0.71264339299427	-0.0951236967667718	-5.46543872737719	9.40820176175219	0.000340506288213612	0.00859346046794035	-0.134236737079649	-0.0560106564538948	0.0174045857087891
chr11:7248185	SYT9	-	0.528514063658887	0.616244917243611	-0.0877308535847243	-5.13925490475887	7.71172262173899	0.000993317592529838	0.0162284121781805	-0.127353654828188	-0.0481080523412609	0.0170707340286793
chr11:7264556	SYT9	+	0.452307852965748	0.563385798983625	-0.111077946017877	-5.68422934235124	17.8636889093405	2.22855950953758e-05	0.00172655861826147	-0.152155425153626	-0.0700004668821289	0.0195414258165612
chr11:73983870	AP003717.4	+	0.529310740314432	0.623519066717596	-0.0942083264031638	-4.25380390223964	12.1512965497996	0.00108940140771234	0.0171595091155603	-0.142395600280572	-0.0460210525257555	0.022146842818392
chr11:74172064	PPME1	+	0.367259980915443	0.271820771820772	0.0954392090946713	8.84677178042151	10.6019115193172	3.21634286170673e-06	0.000567249211502232	0.0715856913920355	0.119292726797307	0.0107880265777721
chr11:7567156	PPFIBP2	-	0.597409719771422	0.703333333333333	-0.105923613561911	-4.49356525517445	8.94940773325256	0.00152417734575958	0.0209807777820745	-0.15929382029241	-0.0525534068314118	0.0235722878264508
chr11:77536659	CLNS1A	+	0.65764404423977	0.740603246157663	-0.0829592019178939	-9.70670083431718	14.1196616143831	1.25318899985248e-07	0.000101065174258978	-0.101275252968514	-0.0646431508672733	0.00854659099254393
chr11:7872113	AC044810.3	+	0.52230462773941	0.620615942028986	-0.0983113142895752	-5.30178289015544	16.0566850577665	7.07473044307283e-05	0.00340321590851298	-0.137609584272208	-0.059013044306942	0.0185430667996842
chr11:7872113	AC044810.2	+	0.52230462773941	0.620615942028986	-0.0983113142895752	-5.30178289015544	16.0566850577665	7.07473044307283e-05	0.00340321590851298	-0.137609584272208	-0.059013044306942	0.0185430667996842
chr11:78971957	TENM4	+	0.67037706557411	0.754641909814324	-0.0842648442402136	-7.69724551558818	16.9519577708321	6.26142386517345e-07	0.000229632781368563	-0.107366831722661	-0.0611628567577663	0.0109474024272142
chr11:8120525	RIC3	+	0.665235456223957	0.797049274255157	-0.1318138180312	-8.51270551709784	16.8312219966223	1.67333369662958e-07	0.00011621681328949	-0.164507940055633	-0.0991196960067666	0.0154843624939745
chr11:82347336	MIR4300HG	-	0.602636421394714	0.691603951603952	-0.0889675302092374	-3.88806762594904	12.5478087155421	0.00198958397295581	0.0246493400599627	-0.138583216372503	-0.0393518440459719	0.0228821972168041
chr11:82371676	MIR4300HG	-	0.543346960609787	0.655642560054325	-0.112295599444538	-4.08628509684641	10.1875130188872	0.00210930786752001	0.0255335458913313	-0.173374875238591	-0.0512163236504853	0.0274810975698201
chr11:82567152	MIR4300HG	+	0.568604136129567	0.660728896913107	-0.09212476078354	-5.92345709850685	13.664415396892	4.1044316771761e-05	0.00247689271061674	-0.125558645570433	-0.0586908759966468	0.0155525327948711
chr11:82800597	LINC02734	-	0.612177153614183	0.698658140497221	-0.0864809868830384	-4.29787773791857	7.01976026789222	0.00355262294556483	0.0351449633696482	-0.134034318079667	-0.0389276556864097	0.0201217885097217
chr11:83233903	ANKRD42	-	0.623312331925777	0.709059132292828	-0.0857468003670506	-4.95779934350906	12.3343612239649	0.000305952005080078	0.00804759581901011	-0.123317112895255	-0.0481764878388458	0.017295334971415
chr11:83308474	AP000446.1	+	0.568495407844898	0.668015835544593	-0.0995204276996953	-5.86278623720317	9.37730948709682	0.000204440094869243	0.00634249665170623	-0.137686163942941	-0.0613546914564491	0.0169749371157648
chr11:83339607	AP000446.1	-	0.655173624473713	0.740290398752286	-0.0851167742785732	-6.11667609946123	9.03412111169021	0.000172930360436579	0.0057413058665035	-0.116577770075874	-0.0536557784812723	0.0139155274685986
chr11:83339774	AP000446.1	-	0.621189733407778	0.743967300633967	-0.122777567226189	-12.1128365142194	17.6294674600119	5.60430297532206e-10	7.23658763994232e-06	-0.144104962641642	-0.101450171810735	0.0101361532521354
chr11:83938120	DLG2	+	0.619002632945464	0.750293942028222	-0.131291309082758	-3.91895130492875	7.60724108781021	0.00488515896646826	0.0426296227202397	-0.20924605228951	-0.0533365658760052	0.0335016433905766
chr11:8397929	STK33	+	0.619120100947832	0.733833255524432	-0.1147131545766	-6.05528339035693	17.2110411207657	1.21987749458201e-05	0.00121326567099629	-0.154644849808541	-0.074781459344659	0.0189443081655404
chr11:84185949	DLG2	-	0.603438501376024	0.684378660555131	-0.080940159179107	-5.66468692875294	6.36776214365461	0.00106134336731236	0.0168886141581044	-0.115419296801572	-0.0464610215566416	0.0142885494286135
chr11:84324584	DLG2	-	0.577730644299881	0.684767350144027	-0.107036705844146	-5.76549747941618	9.15573433178726	0.000253896975244176	0.00720960129281385	-0.148925109542096	-0.0651483021461968	0.0185650425182364
chr11:84325564	DLG2	-	0.609530522649386	0.691076264281132	-0.0815457416317463	-3.97986500595285	6.65249858136435	0.00590545984820311	0.0477889304799055	-0.130513688677841	-0.032577794585652	0.0204895747744647
chr11:84502618	DLG2	-	0.515355302360477	0.64368307131465	-0.128327768954173	-6.68228585844836	15.850298254814	5.52546335165112e-06	0.000774525294426368	-0.169070067660048	-0.0875854702482971	0.0192041722956118
chr11:84599959	DLG2	+	0.562776375832994	0.643419966714951	-0.0806435908819569	-6.29148820219007	15.4157366469443	1.27450669881387e-05	0.00124492875749934	-0.107900239617425	-0.053386942146489	0.0128178879607348
chr11:85187494	DLG2	+	0.591363343122797	0.689769214703425	-0.0984058715806283	-10.6673712758419	17.9998768470294	3.27525967276626e-09	1.82035851477486e-05	-0.117786763136597	-0.0790249800246594	0.00922494108773413
chr11:85321479	DLG2	+	0.674464502706984	0.757759784075574	-0.0832952813685897	-5.42734969694511	11.5392288745729	0.000175734781749039	0.00579460807100388	-0.116882915712952	-0.0497076470242272	0.0153473216246733
chr11:85338274	DLG2	+	0.616515634327107	0.701258309591643	-0.0847426752645362	-5.01677132759915	8.48052071566043	0.000864748655347657	0.0149548521846986	-0.123314552457607	-0.046170798071465	0.0168918752182972
chr11:85419723	DLG2	-	0.588640505378122	0.67478387998983	-0.0861433746117081	-7.09062703234581	13.6382951724776	6.26421794986311e-06	0.000833066610073814	-0.112265172637412	-0.0600215765860039	0.012148907877786
chr11:85454417	DLG2	-	0.600852061472362	0.713831230259249	-0.112979168786887	-5.71745367837119	13.2230639376248	6.63310841683501e-05	0.0032717038247186	-0.15559582682894	-0.0703625107448332	0.0197603994964193
chr11:85495185	DLG2	+	0.535498558602274	0.621818100481894	-0.0863195418796198	-4.23639512545987	8.76824107027455	0.00231813421968582	0.027024792494515	-0.132598975923904	-0.0400401078353355	0.0203757060716214
chr11:86256045	EED	+	0.664746672540454	0.747091503267974	-0.0823448307275202	-5.10863374654922	11.3908065036602	0.000304086551105302	0.00801996312798317	-0.117674037500165	-0.0470156239548752	0.0161187579327139
chr11:87874613	AP000676.5	+	0.561532116044211	0.656776476195714	-0.0952443601515024	-9.83760315168947	9.27718076110312	3.27058200484878e-06	0.000574049851512456	-0.11704646009798	-0.0734422602050243	0.00968166317373206
chr11:87934894	AP000676.5	+	0.654561037021424	0.7496336996337	-0.0950726626122758	-6.24288158123338	7.99191614772528	0.000248653756762396	0.00711656027795714	-0.130196916784986	-0.0599484084395658	0.0152289710088482
chr11:87949202	AP000676.5	-	0.665279941808219	0.793262201979307	-0.127982260171088	-4.61430229360922	7.46095308432821	0.00206825282804788	0.0252243697383174	-0.192754923461722	-0.0632095968804541	0.0277359938789322
chr11:88072781	AP005436.2	+	0.518597257084652	0.340614759178526	0.177982497906126	3.74231531177272	12.5786775464115	0.00259956558750881	0.0289757033095651	0.0748855946921911	0.28107940112006	0.0475594606756469
chr11:88079365	AP005436.2	+	0.589538492369098	0.671299533799534	-0.0817610414304355	-4.54075473134931	13.596226182812	0.000496222455668176	0.0107524008139233	-0.120488045466491	-0.0430340373943803	0.0180060466305212
chr11:88672486	GRM5	+	0.610322327311491	0.717152255639098	-0.106829928327606	-7.10538434460873	16.9057621844848	1.82062576800189e-06	0.000413751131659908	-0.138564621599707	-0.075095235055506	0.0150350668093928
chr11:88790755	GRM5	+	0.535417120473511	0.620961103739742	-0.0855439832662301	-4.58368416598056	11.9755160150234	0.000631701394205046	0.0124143767977463	-0.12621576468043	-0.0448722018520305	0.0186627132604653
chr11:88829862	GRM5	+	0.568913205722661	0.727052167724398	-0.158138962001736	-4.86653909420283	11.6388770465411	0.000422788241558398	0.00978405922301437	-0.229184241633962	-0.0870936823695112	0.0324951590731319
chr11:88896371	GRM5	+	0.616488874390093	0.69996114996115	-0.0834722755710571	-5.08485397015623	7.43925399504962	0.0011833271788672	0.0180107649502806	-0.121829797647847	-0.0451147534942669	0.0164158648529473
chr11:88939275	GRM5	-	0.545521600862158	0.629497354497355	-0.0839757536351964	-6.75021590284527	12.3493561139341	1.76772370252785e-05	0.00150935154951704	-0.11099637432791	-0.0569551329424832	0.0124404544749154
chr11:89230669	TYR	+	0.516259605056598	0.621522181522182	-0.105262576465584	-6.91795106476372	10.6267332640242	3.01578678044868e-05	0.00206465965346066	-0.138896540683936	-0.0716286122472323	0.0152158602279993
chr11:89413673	NOX4	+	0.549860653479075	0.659517383201594	-0.109656729722519	-4.0903860665343	15.850748623066	0.000868797956262015	0.0149972859527654	-0.16653153349597	-0.052781925949068	0.0268084058420991
chr11:90255154	DISC1FP1	-	0.634749899959984	0.553808968808969	0.0809409311510152	4.75066847625674	7.95634987564112	0.00146591925652579	0.0204978585640967	0.0416141471190593	0.120267715182971	0.0170377982710324
chr11:90551948	DISC1FP1	-	0.559691430430848	0.656926655719759	-0.0972352252889109	-7.56462959474901	11.7857358922291	7.38507469124679e-06	0.000917136075282986	-0.125298108781733	-0.0691723417960893	0.0128539307934399
chr11:90563086	DISC1FP1	+	0.503593240395805	0.606362058993638	-0.102768818597833	-3.74179532539313	9.14582687920739	0.00448362965677604	0.0404913965765873	-0.16474853060563	-0.0407891065900367	0.0274651095693044
chr11:90624579	DISC1FP1	+	0.663363068006839	0.777129376471482	-0.113766308464643	-6.44316334616532	10.0593830879215	7.21512832116033e-05	0.0034425904881344	-0.153076881558889	-0.0744557353703976	0.0176569027281222
chr11:90750169	DISC1FP1	-	0.584419287082238	0.664500777000777	-0.0800814899185388	-5.25967502457174	7.28460403191364	0.00103382140728811	0.0166313423325296	-0.115801024676828	-0.0443619551602496	0.015225558526795
chr11:90807795	DISC1FP1	+	0.590420015432374	0.673127736030962	-0.0827077205985873	-6.60740024710645	9.19095709672125	8.93342538089424e-05	0.0039052423292375	-0.110934704258719	-0.0544807369384557	0.0125174376464945
chr11:90808861	DISC1FP1	+	0.550575057184652	0.632826668216694	-0.0822516110320419	-7.08419785417707	16.1267491518152	2.47296953105244e-06	0.000494618439638375	-0.106849217824567	-0.0576540042395173	0.0116105750749951
chr11:90884023	DISC1FP1	-	0.629307038767671	0.7360412688506	-0.106734230082929	-3.8087272735635	9.1021709560185	0.00407614713491812	0.0381964899145832	-0.170019700171334	-0.0434487599945232	0.0280235948695446
chr11:91194648	LINC02748	+	0.594497811746858	0.676733349099273	-0.0822355373524154	-4.33800470217667	8.59719534754532	0.00209716741129983	0.0254365002747932	-0.125427482845063	-0.039043591859768	0.018956995899786
chr11:91204230	LINC02748	-	0.595236603413295	0.677244637171108	-0.0820080337578126	-4.9836833600096	8.37842381234161	0.000936205621740457	0.0156797553853799	-0.11965777170337	-0.0443582958122554	0.0164553058117349
chr11:92679113	FAT3	-	0.643081089376526	0.74021164021164	-0.0971305508351138	-5.93149664530256	13.7105267118985	3.99282860192407e-05	0.00243684449967021	-0.132321957536477	-0.0619391441337508	0.0163753866255722
chr11:93361118	DEUP1	+	0.587693015282529	0.669556834621067	-0.0818638193385378	-5.27137255783626	9.78730824807844	0.000388845622967793	0.00930876241090254	-0.116568762731669	-0.047158875945407	0.0155298868445262
chr11:94982192	KDM4D	-	0.636071462338728	0.725830941172872	-0.0897594788341437	-7.64169333856186	10.8669465417558	1.08202137409542e-05	0.00114026593678831	-0.11565096555695	-0.063867992111337	0.0117460194825138
chr11:95621957	AP000820.2	+	0.635616817564369	0.718935506543265	-0.0833186889788958	-11.0511650999333	17.6485911374752	2.33338240630511e-09	1.53657490633725e-05	-0.0991809294048144	-0.0674564485529772	0.00753935790710419
chr11:95807401	CEP57	+	0.66439354541964	0.84109784264583	-0.17670429722619	-9.38010098696542	15.2793390379403	9.85135193378687e-08	9.0314073056369e-05	-0.216793146467636	-0.136615447984745	0.0188382084022057
chr11:96435857	JRKL	-	0.672617515465644	0.766457811194653	-0.0938402957290089	-7.52319013865457	7.7911646460345	7.7843999204651e-05	0.00360263988842224	-0.12273892746814	-0.0649416639898774	0.0124734712269004
chr11:96441429	JRKL	+	0.561418449765636	0.653717627401838	-0.0922991776362014	-5.53058438082796	17.8143062550358	3.1016186679674e-05	0.00210362426833062	-0.127387398398639	-0.0572109568737643	0.0166888652772682
chr11:96724142	AP003066.1	-	0.583242642112878	0.687540860852642	-0.104298218739764	-7.47041066804673	10.3752424728859	1.735736570487e-05	0.00149401863249036	-0.135254570849725	-0.0733418666298041	0.0139615107353978
chr11:96759988	AP003066.1	-	0.500525664811379	0.580565523657629	-0.0800398588462499	-3.87727789556456	9.45084426892939	0.00341604513191106	0.0343238699880966	-0.126400889854619	-0.0336788278378805	0.0206433123965172
chr11:96933201	AP003066.1	-	0.618267507808116	0.724043458781362	-0.105775950973246	-7.19567819447954	8.89684611444014	5.41962740512261e-05	0.00291373621639138	-0.139088363597805	-0.0724635383486874	0.0146999279448595
chr11:9904239	AC011092.2	+	0.624074629851941	0.71295008912656	-0.0888754592746189	-3.82674837317624	8.68367264827753	0.0043254183424274	0.0396044123518883	-0.141706794413373	-0.0360441241358652	0.023224798342529
chr11:9904239	SBF2	+	0.624074629851941	0.71295008912656	-0.0888754592746189	-3.82674837317624	8.68367264827753	0.0043254183424274	0.0396044123518883	-0.141706794413373	-0.0360441241358652	0.023224798342529
chr11:99114610	CNTN5	-	0.526790694481887	0.648685634540898	-0.121894940059011	-5.92899610642822	10.2598243736189	0.000131046269511758	0.00487689649211167	-0.167546752372671	-0.0762431277453506	0.0205591195998345
chr11:99403236	CNTN5	-	0.580204342342464	0.660855348355348	-0.0806510060128841	-4.72799184759647	11.4163206756906	0.000561460274813466	0.0115634236477147	-0.118029468310789	-0.0432725437149793	0.0170581948134881
chr11:99457912	CNTN5	-	0.616231982143324	0.705265202633624	-0.0890332204902999	-3.8491357126664	7.97365880869513	0.00491415686769854	0.0427888130040994	-0.142403407577064	-0.0356630334035363	0.0231307044325086
chr11:99592961	CNTN5	+	0.435865544843873	0.562597125097125	-0.126731580253252	-5.69997415327021	13.6272165950803	6.08562329604896e-05	0.00311276701465803	-0.174540823272533	-0.0789223372339707	0.0222337113898215
chr11:99719693	CNTN5	+	0.536196447617255	0.630691930749139	-0.0944954831318839	-5.09404506988722	8.06014433294794	0.000915341295984685	0.0154735483539877	-0.137216791506794	-0.051774174756974	0.018550185920121
chr11:99800773	CNTN5	-	0.595678966326573	0.702053745474798	-0.106374779148225	-4.9239908281671	7.71681222343671	0.00128642854169181	0.018927210258897	-0.156512251888016	-0.0562373064084337	0.0216033666309289
chr11:99839711	CNTN5	+	0.56623495003017	0.646353506699188	-0.0801185566690175	-6.1200628705227	7.80210399682055	0.000313197038345933	0.00817257570273029	-0.110440565760502	-0.0497965475775329	0.0130911329448769
chr11:99900048	CNTN5	-	0.612950014225768	0.775091848453146	-0.162141834227377	-3.74906456363189	15.7249834135655	0.00179830852049262	0.0232165949989537	-0.253955283553388	-0.0703283849013665	0.0432486108135473
chr11:99921514	CNTN5	-	0.553260370760103	0.635987654320988	-0.0827272835608847	-4.45665906116763	14.1836721424077	0.000526034652085549	0.0111154237804512	-0.122491837485113	-0.0429627296366561	0.0185626233520341
chr12:10077944	CLEC1A	-	0.499808854961442	0.608485155195681	-0.108676300234239	-4.34044761247132	9.77593042677147	0.00154512382007483	0.0211699244064017	-0.164638341646128	-0.0527142588223498	0.0250380398376383
chr12:102243555	HELLPAR	-	0.61713705000811	0.735064412238325	-0.117927362230215	-8.30953473044798	10.1967565671607	7.44212073153002e-06	0.000920978755242579	-0.149466179802543	-0.0863885446578866	0.0141918129059745
chr12:102256221	HELLPAR	-	0.67426519026583	0.762038091011987	-0.0877729007461578	-6.71488680327855	15.1485128568834	6.58473476089564e-06	0.000857272935978707	-0.115610136789658	-0.059935664702658	0.0130713894839303
chr12:102446823	IGF1	-	0.631368394211655	0.730902777777778	-0.0995343835661229	-7.76004555144776	13.5050863493871	2.44990093615558e-06	0.000491118138376177	-0.127139416405058	-0.0719293507271878	0.0128265205282916
chr12:102446823	LINC02456	-	0.631368394211655	0.730902777777778	-0.0995343835661229	-7.76004555144776	13.5050863493871	2.44990093615558e-06	0.000491118138376177	-0.127139416405058	-0.0719293507271878	0.0128265205282916
chr12:103106038	AC068643.1	+	0.607246547904659	0.687831041507512	-0.080584493602853	-4.20200728337952	14.9300933728946	0.000777144520414697	0.0140364062133677	-0.121477296397108	-0.039691690808598	0.0191776187351208
chr12:103644910	STAB2	+	0.646041714440653	0.749509205391558	-0.103467490950905	-3.70533951082696	16.1854851500306	0.0018881220527423	0.0238896360890589	-0.162608405920991	-0.0443265759808193	0.0279238894704722
chr12:10402712	KLRC4-KLRK1	+	0.584123963350522	0.674484098632705	-0.090360135282183	-3.93459190907234	11.3191034958822	0.00221099382509471	0.0262709789646001	-0.140733692207345	-0.0399865783570211	0.0229655672990715
chr12:104818660	SLC41A2	+	0.621301279498427	0.706476910888676	-0.0851756313902489	-5.21423582812261	7.7484834319994	0.000894905489533838	0.0152600622292165	-0.123058590352622	-0.0472926724278759	0.0163352088777535
chr12:104902577	SLC41A2	+	0.589771228941736	0.684513272556751	-0.0947420436150149	-6.86782182049261	16.8114344192793	2.89770406582187e-06	0.000535407543463267	-0.123871973302078	-0.065612113927952	0.0137950643000548
chr12:105327321	C12orf75	-	0.594892353778794	0.707189530120806	-0.112297176342012	-5.80692283122408	10.9071646573756	0.0001220796834365	0.00468707206168533	-0.154905169400548	-0.069689183283477	0.0193384998571336
chr12:106260449	CKAP4	+	0.634092308210172	0.717537906067852	-0.08344559785768	-4.7994616135176	7.39469969249847	0.00168965957581813	0.0223495779478214	-0.124117325275501	-0.0427738704398592	0.0173864496848265
chr12:107469717	BTBD11	-	0.581917844260431	0.69757740393448	-0.115659559674049	-12.3266398735163	17.0522812666643	6.41753433030852e-10	7.88940442363531e-06	-0.135451113926705	-0.0958680054213931	0.00938289435408448
chr12:108167032	WSCD2	-	0.62385596769768	0.707740864826022	-0.0838848971283416	-4.06849191729425	6.8390864712591	0.0049977485162207	0.0432386345709762	-0.132872652197038	-0.0348971420596452	0.0206181796187835
chr12:108167064	WSCD2	-	0.59454504553631	0.684620239282711	-0.0900751937464002	-4.39291215603108	8.22605878654423	0.00215854208029037	0.0258914605430355	-0.137133811116212	-0.0430165763765884	0.0205046653670811
chr12:109039199	USP30	-	0.550116379885287	0.63430636777128	-0.0841899878859925	-4.83209759512944	17.5802484937669	0.000142433530799643	0.00512797732696107	-0.120857252571924	-0.0475227232000607	0.0174230727398496
chr12:109813193	TRPV4	+	0.62547654681746	0.720783465894993	-0.0953069190775329	-4.6867065933421	7.1981333964493	0.00208203572016097	0.0253271818700045	-0.143125915039611	-0.0474879231154546	0.0203355847393829
chr12:111785920	AC002996.1	-	0.632616441184216	0.754770731749984	-0.122154290565768	-6.63277024120162	14.305562259974	1.01182196912827e-05	0.00109673885589221	-0.161575354480143	-0.0827332266513933	0.0184167830519692
chr12:111785920	ALDH2	-	0.632616441184216	0.754770731749984	-0.122154290565768	-6.63277024120162	14.305562259974	1.01182196912827e-05	0.00109673885589221	-0.161575354480143	-0.0827332266513933	0.0184167830519692
chr12:112571899	RPH3A	+	0.552265383824981	0.647896450528029	-0.0956310667030481	-5.05700354574085	15.0009212981111	0.000141809699732962	0.0051161044772774	-0.135937881102765	-0.0553242523033317	0.0189106188750038
chr12:112579940	RPH3A	-	0.55724645062241	0.64535376903798	-0.0881073184155698	-4.454211053948	6.66023439649274	0.00334063240752531	0.0338488411838446	-0.135369276842461	-0.0408453599886784	0.01978067885613
chr12:112934809	AC004551.1	+	0.610043914993177	0.694747948072416	-0.0847040330792396	-5.13972226624424	13.9193949927707	0.000153070577571313	0.00534051703359869	-0.120069918776102	-0.049338147382377	0.0164802743594812
chr12:11406342	AC078950.1	-	0.537523241606216	0.629750483541165	-0.0922272419349492	-7.88198110423538	12.9000521744761	2.76386257242084e-06	0.000524754577160897	-0.117525688848977	-0.0669287950209219	0.0117010229681204
chr12:11406342	PRB2	-	0.537523241606216	0.629750483541165	-0.0922272419349492	-7.88198110423538	12.9000521744761	2.76386257242084e-06	0.000524754577160897	-0.117525688848977	-0.0669287950209219	0.0117010229681204
chr12:11423057	AC078950.1	-	0.661563812127722	0.76474358974359	-0.103179777615868	-6.94340553347326	17.9814850113108	1.74152443690592e-06	0.000404373718138931	-0.13440201692324	-0.071957538308496	0.014860111096558
chr12:11423057	PRB2	-	0.661563812127722	0.76474358974359	-0.103179777615868	-6.94340553347326	17.9814850113108	1.74152443690592e-06	0.000404373718138931	-0.13440201692324	-0.071957538308496	0.014860111096558
chr12:11446920	PRB2	+	0.617801033949656	0.728561480463935	-0.110760446514279	-9.36905766668111	17.986992113845	2.42693450240356e-08	4.60220178114048e-05	-0.135598710366012	-0.0859221826625451	0.0118219409523086
chr12:11446920	AC078950.1	+	0.617801033949656	0.728561480463935	-0.110760446514279	-9.36905766668111	17.986992113845	2.42693450240356e-08	4.60220178114048e-05	-0.135598710366012	-0.0859221826625451	0.0118219409523086
chr12:11466708	AC078950.1	+	0.624534889713461	0.713465608465608	-0.0889307187521473	-4.68061884083787	10.201784190601	0.000821333451763231	0.0145028184333854	-0.131151636093161	-0.0467098014111332	0.0189997779729973
chr12:11466708	PRB2	+	0.624534889713461	0.713465608465608	-0.0889307187521473	-4.68061884083787	10.201784190601	0.000821333451763231	0.0145028184333854	-0.131151636093161	-0.0467098014111332	0.0189997779729973
chr12:115780217	AC009387.1	-	0.60443936223735	0.734993961352657	-0.130554599115307	-5.17622287014059	8.22706999277118	0.000774911862882651	0.0140170451772674	-0.188438352188079	-0.0726708460425351	0.0252219818177499
chr12:115794522	AC009387.1	+	0.619055883983268	0.709899806076277	-0.0908439220930086	-4.1211717886147	8.51063829097796	0.00292311320084801	0.0311649313814367	-0.141149676974369	-0.0405381672116486	0.0220432262357947
chr12:118802873	LINC02439	-	0.581231547069335	0.70459817959818	-0.123366632528844	-7.82064564815914	17.2287186655401	4.53802493740387e-07	0.000194307598707826	-0.156614255391984	-0.0901190096657052	0.015774481811215
chr12:119056672	AC084361.1	-	0.632152989400889	0.73786075036075	-0.105707760959862	-5.95065204031171	11.9133685019633	6.90995976650814e-05	0.0033527535307983	-0.144443569134932	-0.066971952784792	0.0177640635419047
chr12:119056672	SRRM4	-	0.632152989400889	0.73786075036075	-0.105707760959862	-5.95065204031171	11.9133685019633	6.90995976650814e-05	0.0033527535307983	-0.144443569134932	-0.066971952784792	0.0177640635419047
chr12:119145247	SRRM4	-	0.496952135849919	0.589421056667433	-0.0924689208175144	-5.0618762318723	8.20487149933608	0.000902335713287243	0.0153400549556808	-0.134411962655705	-0.050525878979324	0.0182677166690249
chr12:12112262	BCL2L14	+	0.618995923535073	0.751735768531434	-0.132739844996361	-10.1860214589693	15.6731051798023	2.58751985913538e-08	4.68430314833218e-05	-0.160412440541177	-0.105067249451545	0.0130315693454069
chr12:12193081	LRP6	+	0.61742567962277	0.710042211328976	-0.0926165317062062	-3.46405295682891	17.8863117824659	0.0027900316107643	0.0302869706884554	-0.148813363845446	-0.0364196995669662	0.0267364653082527
chr12:12193081	BCL2L14	+	0.61742567962277	0.710042211328976	-0.0926165317062062	-3.46405295682891	17.8863117824659	0.0027900316107643	0.0302869706884554	-0.148813363845446	-0.0364196995669662	0.0267364653082527
chr12:12193161	LRP6	+	0.545384599464108	0.631125226860254	-0.0857406273961461	-6.02964948794449	11.2721933420177	7.72426556569079e-05	0.00358769625938475	-0.116946315404537	-0.054534939387755	0.0142198360895726
chr12:12193161	BCL2L14	+	0.545384599464108	0.631125226860254	-0.0857406273961461	-6.02964948794449	11.2721933420177	7.72426556569079e-05	0.00358769625938475	-0.116946315404537	-0.054534939387755	0.0142198360895726
chr12:125000038	BRI3BP	-	0.606989189167901	0.690680438842204	-0.0836912496743025	-6.31583749607846	7.80028114905219	0.000254503473476689	0.00722022776869725	-0.114384863250256	-0.0529976360983494	0.013251013777075
chr12:126649983	AC006065.3	+	0.582999098501009	0.689977474936637	-0.106978376435628	-7.2274334783061	6.98344466088562	0.000175259799229669	0.00578489327483523	-0.141995686900154	-0.0719610659711024	0.0148017102830119
chr12:126649983	AC006065.4	+	0.582999098501009	0.689977474936637	-0.106978376435628	-7.2274334783061	6.98344466088562	0.000175259799229669	0.00578489327483523	-0.141995686900154	-0.0719610659711024	0.0148017102830119
chr12:127018918	LINC02405	-	0.614000713288254	0.697328543705355	-0.083327830417101	-3.58464141117991	8.78153382726447	0.00612754024382988	0.048878114196707	-0.136113562932931	-0.0305420979012709	0.0232457924960681
chr12:127207602	AC079949.3	-	0.575932821641242	0.673309451985923	-0.0973766303446804	-5.12971778293465	8.51880756517956	0.000736596649181319	0.0135851640497925	-0.140691417703433	-0.0540618429859275	0.0189828435920255
chr12:129119961	TMEM132D	+	0.585861459968603	0.666376678876679	-0.080515218908076	-3.46622672599125	11.0946408322913	0.00521055941070379	0.0442828308457217	-0.13158762584119	-0.0294428119749623	0.0232284917499304
chr12:130712987	RIMBP2	+	0.602494028527863	0.696243386243386	-0.0937493577155231	-5.1266662004268	12.0896248596098	0.000244641003961032	0.00704946319952805	-0.133559728615315	-0.0539389868157315	0.0182866124008071
chr12:130957899	ADGRD1	-	0.609996526196508	0.690791839616303	-0.0807953134197945	-4.69847753827948	10.4649721172284	0.000745801065296537	0.0136969271435772	-0.118881020154069	-0.04270960668552	0.0171960625035532
chr12:130957899	AC073862.3	-	0.609996526196508	0.690791839616303	-0.0807953134197945	-4.69847753827948	10.4649721172284	0.000745801065296537	0.0136969271435772	-0.118881020154069	-0.04270960668552	0.0171960625035532
chr12:131079675	ADGRD1	-	0.60794155702959	0.689780197620488	-0.0818386405908976	-4.86316393872411	8.30019385149049	0.00112552326914347	0.0174835691459088	-0.120401756622361	-0.0432755245594347	0.0168282709820324
chr12:131111828	ADGRD1	-	0.642674716841494	0.730444256717053	-0.0877695398755587	-4.53815876818498	6.71737662360858	0.00296735197486964	0.0314545639164034	-0.133895142494021	-0.041643937257096	0.0193403413937106
chr12:131187500	LINC01257	+	0.610061289954753	0.709490007541478	-0.0994287175867248	-5.51307122652254	16.7490661359171	4.00887346033721e-05	0.00244283369964166	-0.137522896936384	-0.0613345382370653	0.0180350867060067
chr12:131212673	LINC01257	+	0.59225501883313	0.672408811182536	-0.0801537923494055	-4.84488310133866	7.7436367741819	0.00140420048832432	0.0199618367285857	-0.118525315332386	-0.0417822693664245	0.0165440095607794
chr12:133178137	AC026786.1	+	0.490340188707062	0.571585727604034	-0.0812455388969725	-4.37012860791307	15.6514537846522	0.000499477459385977	0.0107917194246318	-0.120728380616259	-0.0417626971776864	0.0185911093668639
chr12:13459319	GRIN2B	+	0.365778378327458	0.172590709923781	0.193187668403678	8.00046613369408	13.4742770306452	1.76488004349215e-06	0.000407913897638252	0.141207176509141	0.245168160298215	0.0241470515811654
chr12:13525756	GRIN2B	+	0.410646713202287	0.562515382262776	-0.151868669060489	-3.52325310530245	15.0912606762091	0.0030484565835261	0.0319756464155967	-0.243695735429914	-0.0600416026910643	0.0431046718817699
chr12:13629872	GRIN2B	-	0.578619486685608	0.684551656920078	-0.10593217023447	-4.46991261461542	7.94361407531726	0.0021204069547244	0.0256134168977156	-0.160649609500004	-0.0512147309689363	0.0236989353859179
chr12:13804029	GRIN2B	-	0.636111807071007	0.770550563987096	-0.13443875691609	-4.08262265338616	7.62618992242906	0.00389698960707612	0.0371446187826253	-0.211027127162711	-0.0578503866694687	0.0329295083895606
chr12:14453600	ATF7IP	-	0.630582727534145	0.717189754689755	-0.0866070271556093	-7.0581426782307	17.3578776675439	1.70846642465143e-06	0.000400271822768449	-0.112454945243374	-0.0607591090678451	0.0122705123860318
chr12:15410200	PTPRO	+	0.463110302396017	0.601350018564931	-0.138239716168914	-8.81513281236193	15.2561935999635	2.2397427836977e-07	0.000135741022485029	-0.171616480294495	-0.104862952043334	0.0156820911393477
chr12:15729159	EPS8	-	0.641185872448973	0.723567193675889	-0.0823813212269167	-4.53721900103098	13.978954398709	0.000466619993939361	0.0103777026870912	-0.12132925838797	-0.043433384065863	0.0181567874965254
chr12:16694724	AC007529.2	+	0.611200221448669	0.700529100529101	-0.0893288790804319	-5.83017110976919	12.5701537387658	6.7186910024203e-05	0.00329483878344072	-0.122545106942422	-0.0561126512184417	0.0153218280216081
chr12:16694724	AC007529.1	+	0.611200221448669	0.700529100529101	-0.0893288790804319	-5.83017110976919	12.5701537387658	6.7186910024203e-05	0.00329483878344072	-0.122545106942422	-0.0561126512184417	0.0153218280216081
chr12:17114333	AC092110.1	+	0.655403912244601	0.823805319887409	-0.168401407642808	-39.6256241082234	9.33977498941888	1.00190344007172e-11	7.29788574073219e-07	-0.177962097843545	-0.158840717442071	0.00424981085932878
chr12:17550458	AC048352.1	+	0.617911073605697	0.715490114174325	-0.0975790405686278	-7.07485154283748	15.9510167053568	2.67428411244922e-06	0.000515733388818832	-0.126824878873599	-0.0683332022636562	0.0137923799499957
chr12:17550458	LINC02378	+	0.617911073605697	0.715490114174325	-0.0975790405686278	-7.07485154283748	15.9510167053568	2.67428411244922e-06	0.000515733388818832	-0.126824878873599	-0.0683332022636562	0.0137923799499957
chr12:18319914	PIK3C2G	-	0.389486945984167	0.480285917785918	-0.0907989718017505	-5.73719326719115	8.08992811206463	0.000417756232124194	0.00971151804885536	-0.127224162853213	-0.0543737807502876	0.0158263749490532
chr12:18319914	RERGL	-	0.389486945984167	0.480285917785918	-0.0907989718017505	-5.73719326719115	8.08992811206463	0.000417756232124194	0.00971151804885536	-0.127224162853213	-0.0543737807502876	0.0158263749490532
chr12:18513766	PIK3C2G	-	0.551622835403093	0.652200948282187	-0.100578112879094	-6.67727065589773	7.87229874339673	0.000168144193658808	0.00565114546927655	-0.135411216941755	-0.0657450088164335	0.0150627581331091
chr12:18725338	PLCZ1	+	0.571922017079027	0.695836208879687	-0.12391419180066	-6.85103982573572	11.3264093693564	2.37920138260435e-05	0.00179431124408595	-0.163583705503576	-0.0842446780977437	0.0180869174537827
chr12:18725338	AC087242.1	+	0.571922017079027	0.695836208879687	-0.12391419180066	-6.85103982573572	11.3264093693564	2.37920138260435e-05	0.00179431124408595	-0.163583705503576	-0.0842446780977437	0.0180869174537827
chr12:19703889	AEBP2	+	0.451434918873216	0.586944444444444	-0.135509525571229	-4.50162419207574	12.7892417053113	0.000619750020423891	0.0122790202347834	-0.200650835592043	-0.0703682155504149	0.0301023630115032
chr12:19896970	AC024901.1	-	0.606484936564986	0.754449290894483	-0.147964354329497	-6.30658563509466	16.7131940715149	8.53346778573847e-06	0.000991032511683602	-0.197529380652711	-0.0983993280062828	0.0234618798333777
chr12:19963943	AC024901.1	-	0.650973248150935	0.731796916533759	-0.0808236683828236	-4.48366155430309	8.56777093454849	0.00172376101613925	0.022638539794588	-0.121917665422014	-0.0397296713436329	0.0180262643386308
chr12:20842654	SLCO1B3	-	0.609808337026382	0.696372773209355	-0.0865644361829727	-6.88709441837803	13.862127150181	7.88039729155577e-06	0.000949589045542021	-0.113547606416584	-0.0595812659493614	0.0125690793423679
chr12:20842654	SLCO1B3-SLCO1B7	-	0.609808337026382	0.696372773209355	-0.0865644361829727	-6.88709441837803	13.862127150181	7.88039729155577e-06	0.000949589045542021	-0.113547606416584	-0.0595812659493614	0.0125690793423679
chr12:20988968	SLCO1B3-SLCO1B7	-	0.554052775569803	0.69374145178493	-0.139688676215127	-7.0347050517631	10.4213569345929	2.8781526204294e-05	0.00200763663930081	-0.183691713055947	-0.0956856393743059	0.0198570764782976
chr12:20988968	SLCO1B7	-	0.554052775569803	0.69374145178493	-0.139688676215127	-7.0347050517631	10.4213569345929	2.8781526204294e-05	0.00200763663930081	-0.183691713055947	-0.0956856393743059	0.0198570764782976
chr12:21000014	SLCO1B3-SLCO1B7	-	0.544957849107009	0.627258473368313	-0.0823006242613045	-5.23140187250226	13.3148812889101	0.000149773666446756	0.00527741641481857	-0.116206107269794	-0.048395141252815	0.0157320401427961
chr12:21000014	SLCO1B7	-	0.544957849107009	0.627258473368313	-0.0823006242613045	-5.23140187250226	13.3148812889101	0.000149773666446756	0.00527741641481857	-0.116206107269794	-0.048395141252815	0.0157320401427961
chr12:21000521	SLCO1B3-SLCO1B7	-	0.593176159645806	0.692928580646351	-0.0997524210005445	-6.88062825836866	7.02375183253912	0.000231811034834666	0.00683294956203515	-0.134010250786367	-0.0654945912147218	0.0144975745316889
chr12:21000521	SLCO1B7	-	0.593176159645806	0.692928580646351	-0.0997524210005445	-6.88062825836866	7.02375183253912	0.000231811034834666	0.00683294956203515	-0.134010250786367	-0.0654945912147218	0.0144975745316889
chr12:21303637	SLCO1A2	+	0.583723314500625	0.68223988145983	-0.0985165669592049	-8.84196387336726	17.7247903623426	6.49507014132364e-08	7.17237686881519e-05	-0.121950978689317	-0.0750821552290928	0.0111419327617867
chr12:21534805	SPX	+	0.598067903311553	0.699016009290365	-0.100948105978812	-6.57817429724415	8.89562590202442	0.000107383354512664	0.00434929705897966	-0.135725167117217	-0.0661710448404083	0.0153459153584762
chr12:21617250	AC010197.2	-	0.662590193404257	0.745237240938952	-0.0826470475346947	-4.78979977350357	16.3266507396187	0.00018988384847828	0.00607107790761083	-0.119166205955119	-0.0461278891142704	0.0172548021718748
chr12:21843318	ABCC9	-	0.57080894773564	0.680488139311669	-0.109679191576029	-3.60795488540881	9.91255511319035	0.00485235561551491	0.0424502157819197	-0.177494064889474	-0.0418643182625848	0.0303992691315489
chr12:21843318	AC008250.1	-	0.57080894773564	0.680488139311669	-0.109679191576029	-3.60795488540881	9.91255511319035	0.00485235561551491	0.0424502157819197	-0.177494064889474	-0.0418643182625848	0.0303992691315489
chr12:21920720	ABCC9	-	0.423937963849507	0.504196906658706	-0.0802589428091989	-4.41469667183332	7.2167332523345	0.00288014714249551	0.0308883918307316	-0.122987344114683	-0.0375305415037149	0.0181799450279942
chr12:2232108	CACNA1C	-	0.627356857771369	0.712366771159875	-0.0850099133885059	-5.6521219572432	13.7423904182938	6.40389937147723e-05	0.00320324344863708	-0.117325087162609	-0.0526947396144033	0.0150403536992979
chr12:22435699	AC053513.1	+	0.605734084211528	0.686556599600078	-0.08082251538855	-4.12500338483256	17.5918744665558	0.000663495968760502	0.012781838923157	-0.122055115477249	-0.0395899152998509	0.0195933209862883
chr12:22435699	ST8SIA1	+	0.605734084211528	0.686556599600078	-0.08082251538855	-4.12500338483256	17.5918744665558	0.000663495968760502	0.012781838923157	-0.122055115477249	-0.0395899152998509	0.0195933209862883
chr12:22842567	AC084816.1	-	0.645078492549311	0.730588078976385	-0.0855095864270741	-4.49038232893348	8.82453720292618	0.00158597724759003	0.0215112168208206	-0.128718381516477	-0.0423007913376708	0.0190428298000593
chr12:22905966	AC084816.1	+	0.571111684937907	0.652714790929894	-0.0816031059919874	-3.5782991830371	9.18521016834394	0.00575460485679913	0.0470327802659216	-0.133033462601691	-0.0301727493822842	0.0228049980780887
chr12:23241493	AC087235.1	-	0.526811979685958	0.627184762881717	-0.100372783195759	-4.64911134281884	9.84439350399552	0.000948001113717736	0.0157959518732016	-0.1485808343769	-0.052164732014617	0.0215896707552073
chr12:23531783	SOX5	+	0.594865442701546	0.686920344521498	-0.0920549018199519	-5.61985587052635	10.1559269037346	0.000209212389213894	0.00643117335059665	-0.12847666215525	-0.0556331414846543	0.0163802958546925
chr12:23823894	SOX5	-	0.651935526537138	0.740001824484583	-0.0880662979474452	-4.65977408667511	17.1167601088735	0.000220791980415101	0.00664344718969685	-0.127919548771474	-0.0482130471234169	0.0188992634212195
chr12:23994345	SOX5	+	0.598492250297519	0.681483639816973	-0.0829913895194537	-8.42799816677478	10.8897270727797	4.24277111254722e-06	0.000667078385472874	-0.104691530176976	-0.061291248861931	0.00984710578683156
chr12:24411139	SOX5	-	0.660108136371958	0.787601356332006	-0.127493219960049	-9.52595947917469	16.7750020418855	3.53642910586893e-08	5.42484380895614e-05	-0.155759377992602	-0.0992270619274955	0.0133837667731812
chr12:25178745	CASC1	-	0.603027483269419	0.708480177230177	-0.105452693960759	-6.27701580942376	17.7524171910234	6.84420740587533e-06	0.000876714547271308	-0.140783108737925	-0.0701222791835925	0.0167998133448128
chr12:26519853	ITPR2	+	0.641827708253312	0.726547321920942	-0.0847196136676297	-10.6497332332221	9.23138063120472	1.72272891885161e-06	0.000402122997239119	-0.102646760783281	-0.0667924665519784	0.00795509256544989
chr12:27488024	SMCO2	-	0.557550859918371	0.64661481969453	-0.0890639597761584	-5.28911117655794	8.78977740450637	0.000541732636599095	0.0113085651325238	-0.127296018185499	-0.0508319013668178	0.0168391165931437
chr12:28146214	CCDC91	+	0.440644247301285	0.601268334750978	-0.160624087449692	-4.04341470286283	13.2665496661172	0.00133991607157433	0.0193956538833124	-0.246269481947558	-0.0749786929518267	0.0397248611021685
chr12:28300057	CCDC91	-	0.542815088902214	0.642413019079686	-0.0995979301774721	-7.24457556695596	8.89092105032181	5.16150349987919e-05	0.00283600359280723	-0.130756171817379	-0.0684396885375654	0.0137479317120742
chr12:3108833	TSPAN9	-	0.574565922700285	0.666881729381729	-0.0923158066814442	-5.3592579046496	11.2004373745259	0.000216689076289397	0.00656999081972537	-0.130146225709671	-0.0544853876532175	0.0172254831403715
chr12:31538817	DENND5B	+	0.64810446538398	0.732641852378695	-0.0845373869947142	-6.01004668545204	9.48695809353303	0.000161610090684743	0.00551893414994573	-0.116109679065434	-0.0529650949239948	0.0140660116999334
chr12:31576608	DENND5B	+	0.628363342102514	0.712952972839305	-0.0845896307367918	-6.35800934378217	7.28721776289649	0.00032378820234688	0.00834122157591106	-0.115799960857133	-0.0533793006164506	0.0133044206390663
chr12:31984949	RESF1	+	0.636766903731189	0.743284493284493	-0.106517589553304	-7.95766895937808	13.9420339917914	1.49718470914885e-06	0.00037081991303624	-0.135237890989378	-0.0777972881172294	0.0133855266029599
chr12:32604094	FGD4	-	0.595473817057187	0.695663875598086	-0.100190058540899	-4.17482090682691	13.6600619701949	0.000983558836085786	0.0161346864884667	-0.151782469884524	-0.0485976471972734	0.0239986482718486
chr12:32861591	PKP2	+	0.632418779477603	0.76049210335687	-0.128073323879267	-4.7516834086479	8.24661725453265	0.00132635330727511	0.019279061425845	-0.189905578868128	-0.0662410688904063	0.0269532527453698
chr12:3528633	PRMT8	-	0.615341546183719	0.702396322551361	-0.0870547763676423	-6.56981018059895	12.5769126546604	2.11194988122367e-05	0.00167558551207248	-0.115779436748579	-0.0583301159867056	0.0132507293170692
chr12:38551829	AC087897.2	-	0.536971747967989	0.633987027465288	-0.0970152794972998	-6.51689081192428	15.9785584141507	7.14796030506472e-06	0.000899242462090273	-0.128577207244538	-0.0654533517500618	0.014886743125999
chr12:38728232	CPNE8	+	0.58343920901694	0.683157546644389	-0.0997183376274486	-5.03779529453103	8.1068487255618	0.000964809917377492	0.0159546373936129	-0.145258977265865	-0.0541776979890323	0.0197940431870469
chr12:3879977	AC005842.1	+	0.413650223329949	0.333434917991044	0.0802153053389045	5.01546945658357	9.23356021123572	0.000669411452422727	0.0128475273755077	0.0441743406717079	0.116256270006101	0.0159935786735995
chr12:3902655	AC005842.1	-	0.653873629191159	0.739731682146543	-0.0858580529553838	-5.56446827019823	9.58647566218874	0.000278746005162336	0.00761785195014427	-0.120439640729637	-0.0512764651811311	0.0154296958462709
chr12:39568456	ABCD2	-	0.645454845169573	0.738891673628516	-0.0934368284589425	-5.09181559643483	16.7684035113388	9.43098944155058e-05	0.00403869271269329	-0.132193551495773	-0.0546801054221117	0.0183503951958442
chr12:39914170	SLC2A13	+	0.718539839620062	0.482122393001866	0.236417446618196	4.03073203245741	10.0712264770646	0.00236257070139717	0.027336749029254	0.105853978574719	0.366980914661673	0.0586537246124149
chr12:40348900	LRRK2	-	0.516949261298694	0.722395282186949	-0.205446020888255	-5.13217729472741	8.1548956564045	0.000841782891653461	0.0147169564992015	-0.297453285490096	-0.113438756286414	0.0400309671880046
chr12:40358927	LRRK2	-	0.650938206530312	0.74042097765782	-0.089482771127508	-5.73542718853745	17.3553455562504	2.23997746284194e-05	0.00173112049551764	-0.122348346937251	-0.0566171953177646	0.0156017622028825
chr12:41048838	CNTN1	+	0.635152744446233	0.71773205004703	-0.082579305600797	-5.14857547037451	16.5172885128138	8.79259001593478e-05	0.00386998456580223	-0.116494663929371	-0.048663947272223	0.0160392532023601
chr12:43367075	ADAMTS20	+	0.66014142161588	0.766291208791209	-0.106149787175329	-6.65517758381398	16.3648390814968	4.92895204011736e-06	0.000723988566367238	-0.139901021280513	-0.0723985530701453	0.0159499556305598
chr12:43472044	ADAMTS20	+	0.643209289864969	0.747986694677871	-0.104777404812902	-3.85640076758867	15.23905282277	0.00151310465303852	0.0208883743172561	-0.16260931187011	-0.046945497755694	0.0271697396425986
chr12:43480143	ADAMTS20	+	0.645471509023972	0.781646825396825	-0.136175316372853	-4.31373314760737	16.2445568685862	0.000518163901594083	0.0110197282911796	-0.203014399499841	-0.0693362332458647	0.0315678582131079
chr12:43918972	TMEM117	-	0.4355104675903	0.534797065679419	-0.0992865980891191	-4.35428343590414	15.7788579042057	0.000506948598273566	0.0108915075551933	-0.147679907153717	-0.0508932890245216	0.0228020521747461
chr12:44026961	TMEM117	-	0.613048356404304	0.69640871578091	-0.0833603593766058	-8.65959140288161	11.5123945632624	2.22093552200212e-06	0.000462209000619087	-0.104433351217625	-0.0622873675355864	0.00962636174137112
chr12:44102613	TMEM117	-	0.56661808203814	0.647672915319974	-0.0810548332818343	-4.46895035465944	6.95504101417427	0.00295121596457714	0.0313517949862938	-0.12399907193071	-0.0381105946329585	0.0181373313304598
chr12:44782805	NELL2	+	0.646556094740575	0.742102317711613	-0.0955462229710381	-10.1303942412489	16.5255630986805	1.68285386487238e-08	3.85545645110137e-05	-0.115488849733819	-0.0756035962082572	0.00943163915398214
chr12:45061392	AC008127.1	+	0.596422142384875	0.682923976608187	-0.0865018342233118	-4.11711124678675	11.1606499297145	0.00165833340479414	0.0221073583795063	-0.132664158871881	-0.0403395095747423	0.0210103222959601
chr12:46795082	SLC38A4	+	0.567609856062681	0.666837762584126	-0.0992279065214449	-6.18828086381598	14.8505018911741	1.81490637239592e-05	0.00153340306952175	-0.133435285505848	-0.065020527537042	0.0160348097807985
chr12:46795082	AC008014.1	+	0.567609856062681	0.666837762584126	-0.0992279065214449	-6.18828086381598	14.8505018911741	1.81490637239592e-05	0.00153340306952175	-0.133435285505848	-0.065020527537042	0.0160348097807985
chr12:4716743	AC005833.1	-	0.597130984058088	0.682230392156863	-0.0850994080987745	-8.67898530794393	12.7548229922207	1.04176925220965e-06	0.000302101663226862	-0.106323775982319	-0.06387504021523	0.00980522550497723
chr12:4716743	GAU1	-	0.597130984058088	0.682230392156863	-0.0850994080987745	-8.67898530794393	12.7548229922207	1.04176925220965e-06	0.000302101663226862	-0.106323775982319	-0.06387504021523	0.00980522550497723
chr12:48043902	SENP1	+	0.681122825602231	0.554955316213441	0.126167509388789	3.86961624006529	9.36681755950348	0.00351596763332354	0.0349288792377051	0.0528486103534673	0.199486408424111	0.0326046567828805
chr12:48742135	TEX49	-	0.599843638366055	0.735016835016835	-0.13517319665078	-8.52806063378358	10.7446729310137	4.14950778974235e-06	0.000658938661731474	-0.17016110990948	-0.100185283392079	0.0158504028589216
chr12:488076	B4GALNT3	+	0.597363507419898	0.705560053981107	-0.108196546561208	-6.08545362068159	9.00330150245602	0.000182164442386241	0.0059219389248694	-0.148414404962774	-0.0679786881596425	0.0177795367946769
chr12:489588	B4GALNT3	+	0.641332422662472	0.729596444036672	-0.0882640213741999	-5.37088144781371	14.7435062812217	8.25948921835632e-05	0.00373218793198954	-0.12334499881761	-0.0531830439307902	0.0164338055553486
chr12:49249585	TUBA1C	+	0.621229618549665	0.705617116801327	-0.0843874982516624	-3.90363121381774	6.73144658104969	0.00634045393891151	0.0499040323824504	-0.135921552552168	-0.0328534439511564	0.0216176922535497
chr12:49249585	AC010173.1	+	0.621229618549665	0.705617116801327	-0.0843874982516624	-3.90363121381774	6.73144658104969	0.00634045393891151	0.0499040323824504	-0.135921552552168	-0.0328534439511564	0.0216176922535497
chr12:50012713	RACGAP1	+	0.684064917833162	0.796331242287125	-0.112266324453963	-6.30810148674975	17.8989291401465	6.19310160519415e-06	0.000827956120744739	-0.149671920917975	-0.0748607279899508	0.0177971652310572
chr12:511679	B4GALNT3	-	0.624053659243651	0.753208408279305	-0.129154749035654	-7.9636428184131	10.0703833351051	1.17436556111527e-05	0.00118908515241437	-0.165256609102606	-0.0930528889687016	0.0162180489482814
chr12:512158	B4GALNT3	-	0.575378151791677	0.668877930001267	-0.0934997782095902	-4.75947614802211	14.0978845783046	0.000299262237180387	0.00794200266022725	-0.135606624607472	-0.0513929318117086	0.0196449725351488
chr12:51742881	SCN8A	-	0.61692988876869	0.70378293605786	-0.0868530472891702	-6.70876660618009	9.11831120774324	8.24250813908243e-05	0.00372753700789816	-0.116081568404876	-0.0576245261734649	0.0129462019455501
chr12:53222396	RARG	+	0.413967456292145	0.528373109952057	-0.114405653659913	-5.13757417174936	6.6671121784883	0.0015578725481315	0.0212764316778751	-0.167599785875259	-0.061211521444566	0.0222684188753925
chr12:53882315	AC076968.2	-	0.335485194887561	0.254855935752987	0.080629259134574	8.78140034021826	15.3646720906412	2.22701509782562e-07	0.000135704645816423	0.061099046537778	0.10015947173137	0.0091818224896657
chr12:55575710	AC122685.1	+	0.558768278505121	0.652406846679292	-0.0936385681741719	-4.79303531878143	12.7435063890244	0.000371145180847905	0.00905577921754755	-0.135930871511073	-0.0513462648372704	0.01953638184289
chr12:56779200	HSD17B6	-	0.626883116883117	0.720468245205087	-0.0935851283219703	-4.0257019324384	7.53282656119375	0.00431510310049598	0.0395451819094584	-0.147776848645185	-0.0393934079987559	0.0232469094564299
chr12:56781094	HSD17B6	-	0.644901264194742	0.731273815832639	-0.0863725516378969	-6.80123332203401	16.0915459679753	4.13009795234166e-06	0.000657268661137601	-0.113281936703332	-0.059463166572462	0.0126995425018099
chr12:58754622	AC020637.1	+	0.596792633623872	0.680392156862745	-0.0835995232388727	-7.51602147566507	16.0239458117103	1.22265055890323e-06	0.000329157405703204	-0.107176032597606	-0.0600230138801392	0.0111228425184183
chr12:58754622	LINC02388	+	0.596792633623872	0.680392156862745	-0.0835995232388727	-7.51602147566507	16.0239458117103	1.22265055890323e-06	0.000329157405703204	-0.107176032597606	-0.0600230138801392	0.0111228425184183
chr12:58791398	AC020637.1	+	0.647230601567415	0.732517395329877	-0.0852867937624618	-5.40525980384776	11.9560975420689	0.000160768597360409	0.00550191324498823	-0.119679158472869	-0.0508944290520545	0.0157784818597896
chr12:58990404	AC068305.2	+	0.630267811695014	0.711501808987469	-0.0812339972924556	-5.65997282283513	7.01555357079098	0.000760523666823824	0.0138573118919418	-0.115156701522879	-0.0473112930620324	0.0143523652560163
chr12:5932090	ANO2	+	0.597912267370028	0.683069913021535	-0.0851576456515067	-8.83861486935592	17.8217533386219	6.24764625744723e-08	7.11216203058341e-05	-0.105413978345256	-0.0649013129577572	0.00963472748957013
chr12:59417683	AC108721.2	-	0.588497596495024	0.685882352941176	-0.0973847564461522	-5.30508236640466	7.39965111097267	0.000933783698350753	0.0156577351472601	-0.140321118355932	-0.0544483945363725	0.0183568792565517
chr12:62542633	MON2	-	0.604798218821328	0.704668534080299	-0.0998703152589706	-4.75253606930715	10.0000596234355	0.000777240111629336	0.0140364913410684	-0.146692632123701	-0.0530479983942406	0.0210141098989134
chr12:63710768	AC084357.2	+	0.720805320776116	0.564457671957672	0.156347648818444	3.62680085893328	10.5727033431925	0.00423848941509487	0.0391003710033921	0.0609954878789059	0.251699809757982	0.0431089698331077
chr12:63710768	AC084357.3	+	0.720805320776116	0.564457671957672	0.156347648818444	3.62680085893328	10.5727033431925	0.00423848941509487	0.0391003710033921	0.0609954878789059	0.251699809757982	0.0431089698331077
chr12:64050354	AC020611.2	-	0.635317392814076	0.746432579765913	-0.111115186951837	-6.81033966665448	14.4195479378854	7.24504487898252e-06	0.000906607065646538	-0.146013517511462	-0.0762168563922124	0.0163156600684532
chr12:64050354	SRGAP1	-	0.635317392814076	0.746432579765913	-0.111115186951837	-6.81033966665448	14.4195479378854	7.24504487898252e-06	0.000906607065646538	-0.146013517511462	-0.0762168563922124	0.0163156600684532
chr12:65056518	WIF1	-	0.568550117224617	0.665241301907969	-0.0966911846833518	-7.6501891241855	17.2877840939919	5.98591530035582e-07	0.000224465273036828	-0.123323491633498	-0.0700588777332056	0.0126390580825865
chr12:65336390	MSRB3	+	0.637860789305152	0.71795230912878	-0.0800915198236275	-6.80863235103028	7.6841310851221	0.000164596181937021	0.00558066629065586	-0.107412903463484	-0.052770136183771	0.0117632316880068
chr12:65397684	MSRB3	-	0.485026813755805	0.683555479608111	-0.198528665852306	-5.54471417629679	10.9908189198847	0.000174662094336356	0.00577396184519427	-0.277343041314659	-0.119714290389952	0.0358050315201097
chr12:65440113	MSRB3	+	0.481246123771555	0.627146464646465	-0.14590034087491	-5.01309344358529	11.0423073787447	0.000389726457427001	0.00931814002181807	-0.209927561165126	-0.0818731205846932	0.0291038542402601
chr12:66221069	IRAK3	-	0.289977497170102	0.501893814997263	-0.211916317827162	-5.02801883289052	10.4794395290897	0.000446777788853413	0.0101126558151589	-0.305246739846095	-0.118585895808228	0.0421470811606596
chr12:66465823	GRIP1	+	0.622183319746915	0.722172166556544	-0.0999888468096296	-4.54088948253091	10.2360247422086	0.00101139706972741	0.0164135408867575	-0.148898793876228	-0.0510788997430309	0.0220196609484316
chr12:66635832	GRIP1	+	0.660392343581083	0.764548107890499	-0.104155764309416	-7.39925755074129	13.3852916188179	4.37916932975016e-06	0.000676180540440369	-0.134477483962298	-0.0738340446565342	0.0140765155956737
chr12:66635956	GRIP1	+	0.65224358974359	0.73474484823169	-0.0825012584881005	-6.16100736849541	10.2207137448687	9.72803278730719e-05	0.00411907615713862	-0.11225087376136	-0.0527516432148412	0.0133908715821335
chr12:66735434	GRIP1	+	0.563324368822489	0.688840756467624	-0.125516387645135	-6.02363331743536	6.26339063301896	0.000806018999748014	0.0143484121664484	-0.175988217906532	-0.0750445573837381	0.0208373220995755
chr12:66735455	GRIP1	+	0.522171149161419	0.653373015873016	-0.131201866711597	-6.92270253476722	16.1611114106046	3.24985483233366e-06	0.000571445630354787	-0.171346644258098	-0.0910570891650959	0.0189524056613258
chr12:66952151	GRIP1	+	0.524008111808623	0.632562466772993	-0.10855435496437	-5.26081889795062	12.1074389733042	0.000194947868631268	0.00616676555707288	-0.153468855173629	-0.0636398547551109	0.0206344976077123
chr12:66952151	AC073530.1	+	0.524008111808623	0.632562466772993	-0.10855435496437	-5.26081889795062	12.1074389733042	0.000194947868631268	0.00616676555707288	-0.153468855173629	-0.0636398547551109	0.0206344976077123
chr12:678096	LINC02455	+	0.665069559292248	0.745642515379357	-0.080572956087109	-7.14341789356978	14.8255145653856	3.60557266247182e-06	0.000608664656862034	-0.104638942874619	-0.0565069692995987	0.0112793283673965
chr12:678195	LINC02455	+	0.665283983926899	0.775767478708655	-0.110483494781756	-6.18947024566188	13.9908747083513	2.36258443388129e-05	0.00178818220208283	-0.148770782716801	-0.0721962068467119	0.0178502344137114
chr12:69912958	MYRFL	-	0.655849055658982	0.770799477772912	-0.11495042211393	-6.33403777029636	15.4259667802867	1.17696580815293e-05	0.00119084011484815	-0.153539246584189	-0.0763615976436715	0.0181480480986383
chr12:69912958	CNOT2-DT	-	0.655849055658982	0.770799477772912	-0.11495042211393	-6.33403777029636	15.4259667802867	1.17696580815293e-05	0.00119084011484815	-0.153539246584189	-0.0763615976436715	0.0181480480986383
chr12:7052533	C1S	-	0.643075061272209	0.728804256745433	-0.0857291954732246	-4.57011396926012	8.19122307815061	0.00171753802694088	0.0225862380148797	-0.128811585862972	-0.0426468050834775	0.0187586559219011
chr12:70678902	PTPRR	-	0.585805563484135	0.68070638511815	-0.0949008216340149	-4.40486741788442	15.6065238771708	0.000468120318568831	0.0104023708826441	-0.140666961099531	-0.0491346821684985	0.0215445353130728
chr12:70846228	PTPRR	+	0.59810523032777	0.711214207905384	-0.113108977577614	-5.20685110624537	9.62436025809554	0.000449916401060378	0.0101556815093004	-0.161768369815297	-0.0644495853399309	0.0217231058214715
chr12:71098841	AC025575.2	+	0.658020216936707	0.742267836017836	-0.0842476190811294	-4.73486111437179	9.88310550305179	0.000824515393634108	0.0145400125747106	-0.123956657002191	-0.0445385811600678	0.0177930496895488
chr12:71098841	AC025575.1	+	0.658020216936707	0.742267836017836	-0.0842476190811294	-4.73486111437179	9.88310550305179	0.000824515393634108	0.0145400125747106	-0.123956657002191	-0.0445385811600678	0.0177930496895488
chr12:71178950	TSPAN8	+	0.594259673913252	0.699259962049336	-0.105000288136084	-8.40945642920074	12.1802126298346	2.02838495724687e-06	0.000439515855036678	-0.132160322525481	-0.0778402537466871	0.0124859780201113
chr12:71229548	TSPAN8	+	0.584554433584753	0.701062003298845	-0.116507569714092	-8.19012211162008	12.5249784011671	2.22020918733841e-06	0.000462209000619087	-0.147358529405456	-0.085656610022729	0.0142253763895403
chr12:71356659	TSPAN8	+	0.37557379104261	0.28765049879601	0.0879232922466005	3.65587975539931	15.4226911695877	0.00224826513039804	0.0265324463614206	0.036784382862641	0.13906220163056	0.0240498315396583
chr12:71362542	TSPAN8	+	0.391484651630543	0.272190786110075	0.119293865520468	3.20170800065255	14.6921462774479	0.00607502923350857	0.0486190150036619	0.0397320556801329	0.198855675360803	0.0372594457383853
chr12:71405633	TSPAN8	+	0.631691116880362	0.718340780158934	-0.0866496632785714	-9.37963400859092	17.4278901102469	3.15520285487863e-08	5.15243211108192e-05	-0.106103886261934	-0.067195440295209	0.00923806442758938
chr12:71765231	RAB21	-	0.629147613033254	0.753073732925664	-0.12392611989241	-6.51526837193131	12.9003164983743	2.03034308202125e-05	0.00163753702215346	-0.165050527882089	-0.0828017119027313	0.0190208772406523
chr12:72220717	TRHDE	-	0.586813168178683	0.682777399497348	-0.0959642313186655	-5.08407926728807	8.71971480553641	0.000727087827251088	0.013478847372683	-0.138873581343031	-0.0530548812942997	0.0188754396368518
chr12:72234600	TRHDE	+	0.544250507513925	0.625144046222478	-0.0808935387085525	-3.94662904386288	7.22706875010449	0.00521215408539417	0.0442920426803367	-0.12905393383961	-0.0327331435774955	0.0204968690519177
chr12:72388099	TRHDE	-	0.586693406299487	0.691335020320528	-0.104641614021041	-5.68766739345109	13.3892702812156	6.65008959854618e-05	0.00327622423645195	-0.144270894841096	-0.065012333200986	0.0183979840560873
chr12:72412159	TRHDE	+	0.579395254912172	0.667937213024035	-0.0885419581118627	-5.01982209430992	17.0901677071878	0.00010350749810851	0.0042636857325616	-0.1257409162322	-0.0513429999915253	0.0176384653576124
chr12:72438423	TRHDE	-	0.556717976768039	0.667919799498747	-0.111201822730708	-5.73455953033397	8.41372734861811	0.000362348350512902	0.00893069082480515	-0.155538881268834	-0.066864764192583	0.0193915194606467
chr12:72495145	TRHDE	-	0.519660641116912	0.600451145278731	-0.0807905041618199	-5.50149180929228	11.1251809464281	0.000178427786992812	0.00584951177637395	-0.11306809333545	-0.0485129149881895	0.0146851993899838
chr12:72495664	TRHDE	-	0.581457827886399	0.671445221445221	-0.0899873935588221	-5.6661300333955	17.6909514033462	2.40011361396937e-05	0.00180304926008014	-0.123395294606572	-0.0565794925110723	0.0158816322654876
chr12:72533395	TRHDE	-	0.600109721899832	0.685245669562384	-0.0851359476625518	-5.91289684085408	8.90929787167717	0.000234594184771894	0.00687671837933681	-0.11775789137703	-0.0525140039480732	0.0143983482130655
chr12:73198425	LINC02444	-	0.624630676149098	0.776603267253674	-0.151972591104576	-4.01920173535897	13.1720766886744	0.00142226772155349	0.0201223435327999	-0.233551317855953	-0.0703938643531979	0.0378116355214507
chr12:73864583	AC090015.1	-	0.561341170820751	0.652494160827494	-0.0911529900067428	-5.60414237467233	7.74265762517988	0.000570322531666135	0.011677098991186	-0.128878919029544	-0.0534270609839419	0.0162652880516927
chr12:74089302	AC090015.1	-	0.575417025047567	0.660092720080427	-0.0846756950328597	-5.00254316471814	11.6816336162761	0.000334119731422018	0.00849750918450408	-0.121667219397928	-0.0476841706677918	0.0169265296159879
chr12:74124965	AC090015.1	+	0.599393218825992	0.705155723905724	-0.105762505079732	-7.31886735610548	14.6201862831556	2.94432702773652e-06	0.000540024597688449	-0.136633208635888	-0.0748918015235761	0.0144506656472608
chr12:7427057	CD163L1	+	0.672487709520603	0.765275644307902	-0.0927879347872995	-4.95130039372597	16.6997506085567	0.00012768762654685	0.0048098549126134	-0.132380340273052	-0.0531955293015472	0.0187401141940157
chr12:74324236	AC090015.1	+	0.554058231610955	0.643558597086823	-0.089500365475868	-6.139530188106	11.8286027794975	5.34855163895029e-05	0.00289355088009097	-0.121313613128604	-0.0576871178231324	0.0145777221926941
chr12:75140521	KCNC2	+	0.61828038232837	0.700198923883134	-0.0819185415547645	-4.08473864425967	8.75660569226407	0.00290101590724035	0.031031177941472	-0.127478560350893	-0.0363585227586364	0.0200547816369808
chr12:75280873	CAPS2	+	0.532763945499148	0.624890752522332	-0.0921268070231832	-4.27498368742625	12.2700361881218	0.00102670858301516	0.0165590457626307	-0.138966334075667	-0.0452872799706998	0.0215502125292665
chr12:75280873	CAPS2-AS1	+	0.532763945499148	0.624890752522332	-0.0921268070231832	-4.27498368742625	12.2700361881218	0.00102670858301516	0.0165590457626307	-0.138966334075667	-0.0452872799706998	0.0215502125292665
chr12:75609108	AC078923.1	+	0.50006462093394	0.373343925383774	0.126720695550167	3.8364897888131	11.6828930755813	0.00248203421547199	0.0281753867156992	0.0545364441711558	0.198904946929178	0.0330303747763579
chr12:75982292	AC078923.1	+	0.582691298209874	0.695624266800737	-0.112932968590863	-6.50333435988276	13.2719479445909	1.80427027723171e-05	0.00152894951011697	-0.150370630889265	-0.0754953062924619	0.0173653947869442
chr12:75982376	AC078923.1	+	0.616444282782643	0.732759207802114	-0.116314925019471	-5.89011573343579	10.175363886281	0.000142858333796384	0.00513660333087447	-0.160212474905304	-0.0724173751336376	0.0197474770078283
chr12:7660227	APOBEC1	+	0.456919291616088	0.688560334528076	-0.231641042911988	-5.94751200676519	7.11408564394235	0.000537665568712278	0.0112607129082154	-0.323438820516175	-0.139843265307802	0.0389475536406654
chr12:77138377	AC079030.1	+	0.583011421593728	0.666511111950157	-0.0834996903564289	-6.0385759133112	15.7487045122928	1.84271708989016e-05	0.00154685423950112	-0.112851191577108	-0.05414818913575	0.0138277122876547
chr12:77287666	LINC02464	+	0.569551235497224	0.662354415450391	-0.092803179953167	-6.99012954604202	10.9475411689161	2.35705314645991e-05	0.00178552785507487	-0.122041250634796	-0.0635651092715377	0.0132763176049741
chr12:77450914	NAV3	+	0.590289961387113	0.701981140839836	-0.111691179452723	-7.22275574868578	7.36115387376063	0.000136423835611937	0.00499337394673735	-0.147896678814492	-0.0754856800909552	0.01546379018466
chr12:78108007	NAV3	+	0.487313955885384	0.593229918229918	-0.105915962344534	-4.31044782021707	7.40448522091851	0.00308907074277109	0.0322316466559815	-0.163382030623942	-0.0484498940651251	0.024571916135433
chr12:79044583	SYT1	-	0.624192532882259	0.719333932042497	-0.0951413991602387	-6.08261493885576	6.8043418734363	0.000557441077459231	0.0115142536939566	-0.132344432836199	-0.0579383654842785	0.0156415291970029
chr12:79044583	AC090709.1	-	0.624192532882259	0.719333932042497	-0.0951413991602387	-6.08261493885576	6.8043418734363	0.000557441077459231	0.0115142536939566	-0.132344432836199	-0.0579383654842785	0.0156415291970029
chr12:79070431	SYT1	-	0.571056460071837	0.67435587073745	-0.103299410665613	-6.75152849891923	16.7963670870431	3.60837863380046e-06	0.000608951435311598	-0.135609747033048	-0.0709890742981776	0.0153001517629895
chr12:79219183	SYT1	-	0.52869127183037	0.614452555432948	-0.0857612836025781	-4.10781601253188	11.2974610927051	0.00164309249143981	0.0219892273973861	-0.131565357301363	-0.0399572099037933	0.0208775863721605
chr12:79336471	SYT1	-	0.597535566304985	0.692699041103296	-0.0951634747983116	-4.95341458855648	13.8277710636882	0.000219948362045065	0.00662921845428282	-0.136416656293378	-0.0539102933032453	0.0192116918737553
chr12:80458556	PTPRQ	+	0.470076741317364	0.553549331525983	-0.0834725902086187	-5.77015137729862	11.9274272922723	9.09138753583533e-05	0.00394854511223559	-0.115013176667699	-0.051932003749539	0.0144662738896285
chr12:80463357	PTPRQ	+	0.6575402725026	0.757441740998459	-0.0999014684958592	-8.21479305905023	17.8789847276867	1.7615796235291e-07	0.00011872323186714	-0.125463533353052	-0.074339403638666	0.0121611667850595
chr12:80550423	PTPRQ	-	0.299449419627991	0.477272727272727	-0.177823307644736	-4.73065920568254	16.3936051135064	0.000212304089618508	0.00648889811676722	-0.257354362704126	-0.0982922525853464	0.0375895408891708
chr12:81125693	ACSS3	-	0.567804022135864	0.656293045881147	-0.088489023745283	-4.43793082952802	14.3430244078035	0.000531443868892781	0.0111788408283002	-0.131158713648351	-0.0458193338422146	0.0199392525806208
chr12:81125693	AC078955.1	-	0.567804022135864	0.656293045881147	-0.088489023745283	-4.43793082952802	14.3430244078035	0.000531443868892781	0.0111788408283002	-0.131158713648351	-0.0458193338422146	0.0199392525806208
chr12:81471384	PPFIA2	-	0.608834114289328	0.690042256218727	-0.0812081419293984	-3.6606021524477	8.34388661470532	0.00594973763921796	0.048011242713129	-0.132000701157377	-0.0304155827014195	0.0221843670924735
chr12:81471384	AC069228.1	-	0.608834114289328	0.690042256218727	-0.0812081419293984	-3.6606021524477	8.34388661470532	0.00594973763921796	0.048011242713129	-0.132000701157377	-0.0304155827014195	0.0221843670924735
chr12:81493142	PPFIA2	+	0.523475460359582	0.629515908927674	-0.106040448568091	-3.86038177308193	7.77906977605971	0.00507033245098721	0.0435966665738839	-0.169698359118447	-0.042382538017735	0.0274689019898242
chr12:81493142	AC069228.1	+	0.523475460359582	0.629515908927674	-0.106040448568091	-3.86038177308193	7.77906977605971	0.00507033245098721	0.0435966665738839	-0.169698359118447	-0.042382538017735	0.0274689019898242
chr12:8156109	AC092111.3	+	0.642039750682882	0.751277291976022	-0.10923754129314	-6.7547766277165	11.5285457612957	2.48283278948374e-05	0.00184050185461431	-0.144633553546324	-0.0738415290399558	0.0161718954324724
chr12:81732807	PPFIA2	+	0.63788346310184	0.764819764671696	-0.126936301569856	-8.51026787359891	11.5144772468956	2.64280819394204e-06	0.000512182905776515	-0.159587378850699	-0.0942852242890141	0.0149156646365558
chr12:822393	WNK1	-	0.459185303539536	0.674436670379653	-0.215251366840117	-5.41496232742482	12.7698179963992	0.00012569766556238	0.00476863829242527	-0.301286282251309	-0.129216451428925	0.0397512214904888
chr12:82243588	CCDC59	-	0.616549241914365	0.711456894237215	-0.0949076523228495	-6.08940921027476	9.82170795562667	0.000126474351410867	0.00478498359111078	-0.129720375863394	-0.0600949287823048	0.0155856913282672
chr12:82310311	CCDC59	+	0.653279998987434	0.735970417512	-0.0826904185245657	-8.00397886156866	17.9566752757891	2.47485016215386e-07	0.000144275289529323	-0.10439914308722	-0.0609816939619111	0.0103311640316301
chr12:82313442	CCDC59	-	0.57961422177633	0.66251987281399	-0.08290565103766	-4.17696824951039	6.54720850944709	0.00481347361202835	0.0422527819550679	-0.130505460889501	-0.0353058411858195	0.0198482837515889
chr12:82713355	TMTC2	+	0.629760809995232	0.713308154645874	-0.083547344650642	-6.64571478912114	11.4496370240102	2.98917844495578e-05	0.00205381590263522	-0.111085276220022	-0.0560094130812617	0.0125716115273871
chr12:82936009	TMTC2	+	0.646519376981562	0.7618666421298	-0.115347265148238	-8.65654265985572	8.63357728325398	1.52981003060393e-05	0.00138769283227786	-0.145686349424921	-0.0850081808715555	0.0133248653279508
chr12:84234901	AC090679.2	-	0.578439007720044	0.680417483750817	-0.101978476030773	-6.90166175265204	16.9280610112312	2.62267938852316e-06	0.000510525343536701	-0.133163059900067	-0.0707938921614794	0.0147759307374904
chr12:84907342	SLC6A15	+	0.541341973571038	0.634722222222222	-0.0933802486511845	-4.86750252903875	9.05905670544778	0.000870010255655541	0.0150060439041088	-0.136735350180832	-0.0500251471215372	0.0191844273514174
chr12:85070817	LRRIQ1	-	0.566135241975578	0.64888468013468	-0.0827494381591021	-4.62044841405516	15.8083674706298	0.000292199105697465	0.00783726872541864	-0.120753099546768	-0.0447457767714357	0.0179093955269325
chr12:85105411	LRRIQ1	-	0.606393435915643	0.694372358165462	-0.087978922249819	-12.6164394035915	15.3040591982791	1.70724270500338e-09	1.29904948968558e-05	-0.102816599768761	-0.0731412447308764	0.00697335590775114
chr12:85143424	LRRIQ1	-	0.612413897707348	0.716270858154172	-0.103856960446823	-7.84621494625781	17.7214850122578	3.58733744046966e-07	0.000174543138750143	-0.131697319469487	-0.0760166014241601	0.0132365683527899
chr12:85326497	LINC02820	-	0.542227709081424	0.627317492449071	-0.0850897833676472	-5.52013167420618	8.01993445240575	0.000555457854050257	0.0114914537012652	-0.12062019133608	-0.0495593753992147	0.0154144481308743
chr12:86096776	MGAT4C	-	0.322339148778476	0.218378261266192	0.103960887512284	3.60417957520951	13.9543928856984	0.00288822914525727	0.0309424630379579	0.0420765361476613	0.165845238876907	0.0288445360013009
chr12:86112693	MGAT4C	+	0.52529952871837	0.62685813641696	-0.10155860769859	-5.11802211890295	8.49426323914519	0.000754582358374266	0.0137910777914845	-0.146858065172746	-0.0562591502244345	0.0198433311422185
chr12:86500446	MGAT4C	+	0.439401902260047	0.525452746487229	-0.0860508442271823	-3.4026059529791	11.1702900339482	0.0057786906511841	0.0471611387389639	-0.141609717694386	-0.0304919707599783	0.0252896883789443
chr12:86699959	MGAT4C	+	0.586516797412755	0.506325651634576	0.0801911457781784	5.11404266766882	7.23834106296334	0.00124388534411456	0.0185471457698518	0.0433585413236599	0.117023750232697	0.0156805781627811
chr12:86699959	AC010196.1	+	0.586516797412755	0.506325651634576	0.0801911457781784	5.11404266766882	7.23834106296334	0.00124388534411456	0.0185471457698518	0.0433585413236599	0.117023750232697	0.0156805781627811
chr12:8724131	RIMKLB	-	0.61062723405803	0.693071370541701	-0.0824441364836705	-6.44994566711647	15.8658986467493	8.3552953902777e-06	0.000978203407623827	-0.109559697648539	-0.0553285753188024	0.0127821443371209
chr12:89636302	ATP2B1	+	0.593215126954585	0.695536635706914	-0.10232150875233	-4.568408278415	6.74295721727914	0.00283791292922438	0.0306155061919245	-0.155695515944863	-0.0489475015597966	0.0223976279081234
chr12:89682367	ATP2B1	+	0.631780231722182	0.713736631016043	-0.0819563992938606	-5.18469911737845	17.8672438063931	6.38149140885471e-05	0.00319702072437855	-0.115184123956075	-0.0487286746316462	0.0158073588145459
chr12:90635377	AC112481.2	+	0.495667782260863	0.630768208399787	-0.135100426138924	-9.17881116450223	17.425528991043	4.33669753154129e-08	5.85621924453428e-05	-0.166096561718114	-0.104104290559733	0.014718728135666
chr12:90635377	LINC02822	+	0.495667782260863	0.630768208399787	-0.135100426138924	-9.17881116450223	17.425528991043	4.33669753154129e-08	5.85621924453428e-05	-0.166096561718114	-0.104104290559733	0.014718728135666
chr12:90683786	AC112481.2	+	0.601600797764	0.696033541621777	-0.094432743857777	-4.59332485919436	13.8780280171806	0.000427030607516754	0.00984186394908165	-0.138563134368116	-0.0503023533474376	0.0205586904372228
chr12:90683786	LINC02822	+	0.601600797764	0.696033541621777	-0.094432743857777	-4.59332485919436	13.8780280171806	0.000427030607516754	0.00984186394908165	-0.138563134368116	-0.0503023533474376	0.0205586904372228
chr12:90789892	AC112481.2	+	0.608465734358592	0.698486467236467	-0.0900207328778757	-8.80350233794006	8.84706464576078	1.14392258940086e-05	0.00117229834608936	-0.113213652574388	-0.066827813181363	0.0102255590357394
chr12:90789892	LINC02822	+	0.608465734358592	0.698486467236467	-0.0900207328778757	-8.80350233794006	8.84706464576078	1.14392258940086e-05	0.00117229834608936	-0.113213652574388	-0.066827813181363	0.0102255590357394
chr12:91149355	DCN	+	0.546871905736899	0.642077415761626	-0.0952055100247271	-4.38099758692001	7.44672821517977	0.00278564107580259	0.0302599982130726	-0.145973905628558	-0.0444371144208959	0.0217314682639804
chr12:91998365	LINC01619	+	0.5880876579543	0.685479558755421	-0.0973919008011205	-7.51214265371015	11.3712190626058	9.7529778485936e-06	0.00107296390361087	-0.125813543457326	-0.0689702581449153	0.0129645968255169
chr12:92834919	EEA1	-	0.670492730953257	0.770480670000794	-0.0999879390475366	-4.41884168649849	15.1547261808604	0.000486270233010623	0.0106396680890062	-0.148174750113088	-0.0518011279819853	0.0226276355075231
chr12:93865985	CRADD	-	0.63815845834355	0.72134316560415	-0.0831847072606005	-4.80557415411256	7.9952738695307	0.00134814993147673	0.0194659663780966	-0.12310585126412	-0.0432635632570808	0.0173100454998518
chr12:94384806	CEP83	-	0.642378053616636	0.758086419753086	-0.11570836613645	-6.53447079064972	16.3193655682617	6.23894017103358e-06	0.000831666791960131	-0.15318672250759	-0.0782300097653112	0.0177073813386724
chr12:95565791	PGAM1P5	+	0.599042171974503	0.689687629789932	-0.0906454578154288	-5.33187569532111	11.3565183306107	0.000215680710922072	0.00654954849814934	-0.127920859199708	-0.0533700564311492	0.0170006697446028
chr12:95714646	NTN4	+	0.517816725399577	0.598142277497994	-0.0803255520984174	-5.49984218766206	10.3716642625763	0.000229904682232989	0.00679777039377646	-0.112710287463448	-0.0479408167333864	0.0146050649014282
chr12:97052608	AC007656.2	-	0.552699509588943	0.651340612002377	-0.0986411024134336	-5.57002432721599	11.4017252339404	0.000146997881940765	0.00522374513209371	-0.137452055476265	-0.0598301493506025	0.0177092767676899
chr12:97052608	AC007656.1	-	0.552699509588943	0.651340612002377	-0.0986411024134336	-5.57002432721599	11.4017252339404	0.000146997881940765	0.00522374513209371	-0.137452055476265	-0.0598301493506025	0.0177092767676899
chr12:97441909	RMST	+	0.625099620267688	0.725097768576029	-0.099998148308342	-4.96915118927895	7.61776560696655	0.00126459703725177	0.0187293371904895	-0.14681213251908	-0.0531841640976036	0.0201237886510859
chr12:97480183	RMST	-	0.62988850941249	0.730446240554936	-0.100557731142446	-4.0808054705256	17.0333663928876	0.000775582593258153	0.0140238247024015	-0.152539286070072	-0.0485761762148204	0.0246416379973864
chr12:97507966	RMST	+	0.575620377337538	0.655832076420312	-0.0802116990827738	-3.93012954228379	8.47734609160025	0.0038865058849714	0.037093895340302	-0.126818604223256	-0.0336047939422916	0.0204094288037546
chr12:97725222	AC007424.1	+	0.616814909622296	0.698079479000532	-0.0812645693782358	-3.66783435581283	10.9312355651421	0.0037416149886173	0.0362500697466279	-0.13006706855785	-0.0324620701986218	0.0221560085584145
chr12:9864107	CLEC2B	+	0.606091242471716	0.736083540115798	-0.129992297644082	-7.92211103047004	10.6430300013545	8.78396019293797e-06	0.00100811567902416	-0.166256152782135	-0.0937284425060297	0.0164087952244175
chr12:99620635	ANKS1B	+	0.549945405255097	0.663942700431789	-0.113997295176692	-7.97122078069262	17.9987295014204	2.58095892681333e-07	0.0001478041614456	-0.144042961751715	-0.0839516286016685	0.014301108740183
chr12:99816106	ANKS1B	-	0.573583985620867	0.667174592718071	-0.0935906070972043	-5.61452327025398	7.62651600592962	0.000594681582909253	0.0119776812888812	-0.13236040583775	-0.0548208083566582	0.0166693773615744
chr12:99882074	ANKS1B	+	0.499007431050775	0.599386282290694	-0.100378851239919	-9.40122918103761	17.9751529248452	2.3181772258663e-08	4.53365144548194e-05	-0.122813049383608	-0.0779446530962306	0.01067720500234
chr12:99942297	ANKS1B	+	0.618098205693883	0.705290303566166	-0.087192097872283	-5.37730155170545	7.87789156895506	0.000698825549074018	0.0131727176015649	-0.124684714958221	-0.0496994807863447	0.0162148425253609
chr13:100129016	PCCA	-	0.513545698666049	0.422643405188162	0.0909022934778867	4.72542535449537	13.1960480551851	0.000380956213660405	0.00919519301530207	0.049406283519943	0.13239830343583	0.0192368488884096
chr13:100775088	NALCN-AS1	-	0.544696412127477	0.463713682354033	0.0809827297734439	5.2368357863861	10.2723256470664	0.000348402608112814	0.00871296691152841	0.0466500789747762	0.115315380572112	0.0154640575104474
chr13:101075159	NALCN	+	0.607122686428622	0.699267676767677	-0.0921449903390551	-5.3181843071705	17.7664562231551	4.89358891863604e-05	0.00275095509985054	-0.128580735935168	-0.0557092447429424	0.0173264003308077
chr13:101387775	NALCN	+	0.587070812422234	0.669915458937198	-0.0828446465149636	-4.96653837720648	14.9365481006094	0.000171100191767738	0.00571066143872171	-0.118411580040027	-0.0472777129899006	0.016680561031235
chr13:101549661	ITGBL1	+	0.400807338997461	0.484878513864021	-0.0840711748665606	-5.0359791335598	7.46787044511581	0.00123877378982077	0.0185046391290948	-0.123050598869326	-0.0450917508637953	0.0166941070717132
chr13:101987453	FGF14	-	0.56515112375885	0.654851601312581	-0.0897004775537313	-4.08290761320049	6.74787857627887	0.0050511756563539	0.0435045751110264	-0.142046773211642	-0.0373541818958206	0.0219697544131834
chr13:102064619	FGF14	+	0.553273166190228	0.663810378788858	-0.11053721259863	-8.75138024563399	14.6996192129332	3.27364333201966e-07	0.000167701850137598	-0.137507188299214	-0.0835672368980448	0.0126308318797799
chr13:102338842	FGF14-IT1	+	0.643391874568669	0.727374918778428	-0.0839830442097583	-4.87958783207302	12.7230002421539	0.000320034880620771	0.00828057395815627	-0.121247809716702	-0.0467182787028148	0.0172110938669341
chr13:102338842	FGF14	+	0.643391874568669	0.727374918778428	-0.0839830442097583	-4.87958783207302	12.7230002421539	0.000320034880620771	0.00828057395815627	-0.121247809716702	-0.0467182787028148	0.0172110938669341
chr13:105768101	LINC00343	+	0.548756535657243	0.640357382269147	-0.0916008466119037	-5.17127114829126	10.5544276010172	0.000351721059406179	0.0087648529025192	-0.130789552743014	-0.0524121404807938	0.0177134101046261
chr13:106054702	AL138701.2	+	0.564248614200516	0.710690933331935	-0.146442319131419	-10.4465267644855	17.7932159279405	5.11263048024938e-09	2.20331682141411e-05	-0.175918181738319	-0.116966456524519	0.0140182782692207
chr13:106252357	AL139379.1	+	0.594826222413669	0.691139630034153	-0.096313407620484	-5.18884878689509	8.62866113741209	0.000655234058097586	0.0126825785765221	-0.138579772184656	-0.054047043056312	0.0185616138716033
chr13:107230732	FAM155A	+	0.474740725648308	0.568368270518808	-0.0936275448705006	-5.05498821569769	9.98802178590595	0.000497446024828341	0.0107679663547791	-0.134903424930409	-0.0523516648105917	0.0185218126878617
chr13:107394015	FAM155A	+	0.537313628064402	0.622419519478343	-0.085105891413941	-4.8783332693545	17.9594340238887	0.000121641920782692	0.00468198313268395	-0.121763861782485	-0.0484479210453966	0.017445690303402
chr13:107799779	FAM155A-IT1	+	0.487751468355398	0.576498809832143	-0.0887473414767456	-4.70451871280395	10.8700821722118	0.000666502817830613	0.0128173523177863	-0.130327958851472	-0.0471667241020187	0.0188642764317651
chr13:107799779	FAM155A	+	0.487751468355398	0.576498809832143	-0.0887473414767456	-4.70451871280395	10.8700821722118	0.000666502817830613	0.0128173523177863	-0.130327958851472	-0.0471667241020187	0.0188642764317651
chr13:108295176	TNFSF13B	-	0.629750610375606	0.719807108600212	-0.0900564982246059	-4.54683495499127	7.26587165641935	0.00240659330851693	0.0276337439873618	-0.136546043811565	-0.0435669526376472	0.0198064145974216
chr13:109683852	AL163541.1	+	0.59512789459218	0.683617067465347	-0.088489172873167	-4.48390253257062	10.5157435650311	0.00103440992123075	0.0166358794048605	-0.13217059454169	-0.0448077512046442	0.0197348564627332
chr13:109759094	IRS2	+	0.627724064863268	0.711360499403978	-0.0836364345407093	-5.72169202504076	11.238256421721	0.000123281562128572	0.00471400514391528	-0.115726159469057	-0.0515467096123616	0.014617430329119
chr13:110042349	AL390755.1	+	0.577565446356013	0.661414141414141	-0.083848695058128	-4.73831149150612	9.34610985260157	0.000956685075855943	0.0158787804841137	-0.1236547643881	-0.0440426257281557	0.0176959018436071
chr13:110655063	CARS2	+	0.648788880306149	0.878256774090107	-0.229467893783958	-7.41728628680395	8.63292328305142	5.03068329573725e-05	0.00279623962771765	-0.299908288711406	-0.159027498856511	0.0309369066948654
chr13:111117582	ARHGEF7	-	0.628275470107071	0.728980862133036	-0.100705392025965	-5.96955012697531	8.93087815754731	0.000216777343860572	0.00657161315357433	-0.138912706443562	-0.0624980776083674	0.016869846116359
chr13:111604880	LINC02337	-	0.467369404526493	0.563309984362616	-0.0959405798361228	-3.87026178296567	17.9514983505481	0.0011261101607251	0.0174888357967967	-0.148030782752699	-0.0438503769195461	0.024789170659822
chr13:111604880	AL359649.1	-	0.467369404526493	0.563309984362616	-0.0959405798361228	-3.87026178296567	17.9514983505481	0.0011261101607251	0.0174888357967967	-0.148030782752699	-0.0438503769195461	0.024789170659822
chr13:111663246	AL359649.1	-	0.492494781742902	0.379788753284177	0.112706028458725	4.36467136265378	11.2541343201953	0.00106888138015808	0.0169545500311974	0.0560276329213042	0.169384423996147	0.0258223401246409
chr13:111871201	LINC00354	-	0.610701907061011	0.700198412698413	-0.0894965056374013	-5.72692314625833	16.6893890726953	2.6499666689753e-05	0.00191353789445598	-0.122514091312343	-0.0564789199624595	0.0156273278603142
chr13:112972607	MCF2L	+	0.624214203211293	0.706257631257631	-0.0820434280463386	-8.27155223703478	16.1414853860362	3.36584372041789e-07	0.000169464740096506	-0.103055261694576	-0.061031594398101	0.00991874628790954
chr13:18475471	ZNF962P	+	0.62352853544804	0.713540245701023	-0.0900117102529828	-3.46996630513682	17.0490682165169	0.00291830914329734	0.0311372337276666	-0.144728806887115	-0.0352946136188504	0.0259402260245964
chr13:18936250	AL355516.1	-	0.576966975601429	0.667944147355912	-0.0909771717544826	-5.47300973994125	13.00629986697	0.000106759794694	0.0043330644459411	-0.126886947672833	-0.055067395836132	0.016622877735909
chr13:19079846	AL137001.2	+	0.475880865166579	0.569694616977226	-0.0938137518106462	-3.4876256721543	13.0044381925331	0.00400615608436813	0.0377815251047273	-0.151923559753236	-0.0357039438680567	0.0268990312118839
chr13:19288333	ANKRD26P3	+	0.5253344187223	0.629497354497355	-0.104162935775054	-5.57463120757502	7.41452135240426	0.000686354717382608	0.0130329084524172	-0.147850497145724	-0.0604753744043848	0.0186851707129099
chr13:19453185	TPTE2	-	0.625641290018073	0.724639664294837	-0.0989983742767633	-4.5356076640605	13.4254836681031	0.000516865361599271	0.0110050478088199	-0.14600111864075	-0.0519956299127768	0.0218269263149042
chr13:19472013	TPTE2	-	0.51017622728149	0.615328707240472	-0.105152479958981	-4.24637784088503	9.4264328679945	0.00194032263046257	0.0242715752410292	-0.160786051194496	-0.0495189087234669	0.0247628647047257
chr13:19981673	ZMYM2	-	0.436303630806736	0.545866402116402	-0.109562771309666	-6.35383749841644	14.6692822316758	1.43714843441915e-05	0.00133751284030778	-0.14638884846169	-0.0727366941576415	0.0172435589259203
chr13:22912183	LINC00621	+	0.461733958282684	0.577028799267188	-0.115294840984505	-4.44491864469181	10.9066723433115	0.00100757547500879	0.0163771803232741	-0.172444911303084	-0.0581447706659252	0.0259385717041619
chr13:23193681	SGCG	+	0.639381172049239	0.722725442834139	-0.0833442707848993	-5.36996934741315	9.38970761866183	0.000389968960157762	0.00932135588905939	-0.118233062613718	-0.0484554789560804	0.0155204369695422
chr13:23480323	LINC00327	-	0.641058355286982	0.723530915965127	-0.082472560678145	-3.825887684807	9.50358655099972	0.00366664159064174	0.0358087853012548	-0.130845580360342	-0.0340995409959478	0.0215564510703365
chr13:23786151	MIPEP	+	0.653451176668888	0.733803485162181	-0.0803523084932932	-5.7993696359184	14.8874412595446	3.61114156100652e-05	0.00230059729378431	-0.109903751523511	-0.0508008654630754	0.0138553521395897
chr13:23786471	MIPEP	+	0.479720039130805	0.630023588382722	-0.150303549251917	-5.83317125014515	15.32194635388	3.02554111895531e-05	0.00206782875828761	-0.205124352015447	-0.0954827464883871	0.0257670386838337
chr13:24553353	TPTE2P6	-	0.610299877873624	0.691196276490394	-0.0808963986167706	-4.89674613767154	6.72287987727883	0.00197412317895887	0.0245235358939606	-0.120289842334173	-0.0415029548993678	0.0165204395617776
chr13:25098349	PABPC3	+	0.603932155160009	0.687226740281316	-0.0832945851213068	-6.09901525607465	13.2662413206686	3.46874081414531e-05	0.00225051942293989	-0.112738779778276	-0.0538503904643378	0.0136570547250796
chr13:25466038	ATP8A2	-	0.613762444086752	0.71194885361552	-0.0981864095287688	-5.31335967083399	13.6948178378535	0.000117926889355422	0.00459945503926118	-0.137903281228223	-0.0584695378293143	0.0184791573715087
chr13:25612252	ATP8A2	-	0.482567433387946	0.570385538428062	-0.0878181050401169	-4.48432827919839	9.48846630552524	0.00133472825494982	0.0193517633849374	-0.131773468923346	-0.0438627411568874	0.0195833354679857
chr13:25614121	ATP8A2	-	0.658873580850198	0.774708421380248	-0.11583484053005	-4.26767626735937	7.76895074088946	0.00292264373712999	0.0311621939510121	-0.178750748382295	-0.0529189326778061	0.0271423681819529
chr13:25646848	ATP8A2	-	0.600353281418076	0.686706349206349	-0.0863530677882735	-4.13427633082835	6.88508633453163	0.00454067119939442	0.0407915581342133	-0.135910824571713	-0.0367953110048343	0.0208871059595989
chr13:25938290	ATP8A2	+	0.351169883626279	0.228504025214552	0.122665858411727	3.43285867934482	17.5751340799128	0.00305130650158742	0.0319936500824339	0.0474636091741583	0.197868107649297	0.0357328599484145
chr13:26137708	ATP8A2P3	+	0.532304214209585	0.652282611166626	-0.119978396957041	-4.23712649351024	6.24138827132082	0.00499367004495358	0.0432181049420424	-0.188620699000546	-0.0513360949135355	0.0283159818666742
chr13:26137708	RNF6	+	0.532304214209585	0.652282611166626	-0.119978396957041	-4.23712649351024	6.24138827132082	0.00499367004495358	0.0432181049420424	-0.188620699000546	-0.0513360949135355	0.0283159818666742
chr13:27232605	LINC02340	-	0.652920508249772	0.734690556357223	-0.0817700481074511	-7.96354163249514	17.5945177070502	3.0631473094557e-07	0.000161883078919199	-0.103378112968564	-0.0601619832463379	0.0102680505585341
chr13:27576243	LNX2	+	0.678416951575952	0.504481070005264	0.173935881570689	3.85718865614185	9.5441799013698	0.00346180725640536	0.0346011553213065	0.0728060355517224	0.275065727589655	0.0450939523773949
chr13:27898512	PLUT	-	0.565781390587745	0.695801303589571	-0.130019913001826	-6.1376548106185	9.5642047907369	0.000132843497492801	0.00491758584373794	-0.177513903206074	-0.082525922797579	0.0211839728713457
chr13:28030636	FLT3	+	0.632368925671115	0.868903318903319	-0.236534393232204	-5.69253747807077	5.44329616587924	0.00176337413874621	0.0229509824864374	-0.340782263220105	-0.132286523244303	0.0415516620037022
chr13:28053584	FLT3	-	0.646896310971941	0.74170692431562	-0.0948106133436787	-6.43415140407196	10.3978079432912	6.2771864292701e-05	0.00316612040458757	-0.127473939450909	-0.062147287236448	0.0147355272497436
chr13:30291227	KATNAL1	+	0.493520993073423	0.673756798756799	-0.180235805683376	-4.14837878725298	11.0394873771706	0.00160867224081462	0.021710052655851	-0.275820925024737	-0.0846506863420152	0.0434472874649729
chr13:31078187	WDR95P	+	0.6616232541679	0.747251328917996	-0.0856280747500959	-6.86567122220124	17.1804803542992	2.58764082712759e-06	0.000506862736889304	-0.111920476386906	-0.059335673113286	0.0124719159975508
chr13:35040755	NBEA	-	0.629052453451966	0.722491113404426	-0.0934386599524598	-8.49304788536249	14.8989377342677	4.3006182549925e-07	0.000189075810739043	-0.116902264447663	-0.0699750554572563	0.0110017818354114
chr13:35126684	NBEA	+	0.636766616879359	0.762769791340374	-0.126003174461015	-10.0547628335926	17.7352126218971	9.48775354919813e-09	2.88754066765928e-05	-0.152359482975852	-0.0996468659461779	0.0125316903587266
chr13:35126701	NBEA	+	0.615567048206528	0.710155744638503	-0.0945886964319754	-8.69403208480714	9.86369601854598	6.18640764915172e-06	0.000827710610828436	-0.118875722988503	-0.0703016698754482	0.0108797270943214
chr13:35261388	NBEA	+	0.628451017261278	0.735482654600302	-0.107031637339024	-5.12448679692646	9.42501590408862	0.000539803835550431	0.0112886527615869	-0.153956963085292	-0.0601063115927547	0.0208863134164417
chr13:35394575	NBEA	-	0.646937048690914	0.7341098577112	-0.0871728090202866	-5.11409257860658	17.3784986230393	8.07528948290229e-05	0.00368553579604667	-0.123076321118248	-0.0512692969223247	0.0170456063671883
chr13:35513211	NBEA	-	0.60331216048552	0.693625356125356	-0.0903131956398363	-9.26569609898497	17.4097032519376	3.80881637875554e-08	5.57600445108541e-05	-0.110840868497964	-0.0697855227817087	0.00974704918821262
chr13:35517497	NBEA	-	0.616250695493419	0.699464133074814	-0.0832134375813947	-5.89188094137117	16.7860001834362	1.86990057087769e-05	0.00156113025240331	-0.113040187852939	-0.0533866873098499	0.0141234078572587
chr13:36022678	DCLK1	+	0.590404307138972	0.67718323156763	-0.0867789244286581	-6.54805276657852	13.0125875467782	1.85046311227155e-05	0.00155095799765736	-0.115406677115639	-0.0581511717416775	0.0132526305944846
chr13:36179010	SOHLH2	-	0.59097492790312	0.689953000928611	-0.0989780730254906	-7.79964928810341	11.1918051205424	7.47803394203102e-06	0.00092408784817231	-0.126850431976926	-0.0711057140740548	0.0126900671260257
chr13:36179010	CCDC169-SOHLH2	-	0.59097492790312	0.689953000928611	-0.0989780730254906	-7.79964928810341	11.1918051205424	7.47803394203102e-06	0.00092408784817231	-0.126850431976926	-0.0711057140740548	0.0126900671260257
chr13:37714329	TRPC4	-	0.559285178922508	0.6544828076158	-0.0951976286932924	-4.74401562986687	9.77285147889276	0.000838848475141962	0.0146845826926195	-0.140050707681672	-0.0503445497049123	0.0200668876582019
chr13:37732836	TRPC4	+	0.606003108314033	0.696771988499677	-0.0907688801856446	-3.76117939970049	7.55752705561433	0.00613900477460386	0.048929739578774	-0.146992155692091	-0.0345456046791977	0.0241330897943535
chr13:37788100	TRPC4	-	0.652483432429085	0.761507936507936	-0.109024504078852	-8.02977611076228	13.8775169846018	1.39102396394434e-06	0.000355166474617088	-0.138169535076596	-0.0798794730811074	0.01357752726539
chr13:37796890	TRPC4	+	0.566023268456417	0.673635107317119	-0.107611838860702	-7.09759120103542	8.12183302194038	9.49197246841456e-05	0.00405636385219822	-0.142483795195709	-0.0727398825256948	0.0151617409079581
chr13:37803121	TRPC4	-	0.590066270271049	0.672443073772861	-0.0823768035018124	-8.01303516779582	8.77743513204225	2.5310519801305e-05	0.00186566265956271	-0.105722770166221	-0.0590308368374036	0.0102803496773461
chr13:37829039	TRPC4	+	0.533165133034059	0.618094647392893	-0.0849295143588341	-4.72119577916892	9.77492647348768	0.000867322055455173	0.0149812199794652	-0.125136920164294	-0.0447221085533739	0.0179889837938016
chr13:37833398	TRPC4	-	0.593945844501461	0.68489627735152	-0.0909504328500589	-4.7367925981028	9.87851364765437	0.000823182826452011	0.0145227545501779	-0.133804011788847	-0.0480968539112706	0.0192008476128946
chr13:38106737	LINC00571	+	0.576216146847168	0.67873197396339	-0.102515827116222	-7.15133892897059	17.3571953972135	1.43831304447681e-06	0.000362861646456701	-0.132713098433509	-0.0723185557989353	0.0143351934699841
chr13:38220840	LINC00571	-	0.617647746394589	0.709206069925388	-0.0915583235307983	-7.24566007491859	17.3411803105958	1.21617448557836e-06	0.000328299649246781	-0.118178682235524	-0.0649379648260726	0.012636298499254
chr13:38810217	FREM2	-	0.458913089720958	0.54559653491026	-0.0866834451893027	-4.53359027610452	6.38097996566228	0.00339471590836655	0.0341818570470502	-0.132800199032062	-0.0405666913465431	0.0191202644946083
chr13:38934441	ANKRD26P2	-	0.533017151930195	0.617307692307692	-0.0842905403774969	-3.82776860210098	16.4041104861834	0.00142529676147567	0.0201454066237458	-0.130879269222302	-0.0377018115326915	0.0220208035384458
chr13:39129965	AL354809.1	-	0.620705396125083	0.714470831195211	-0.0937654350701275	-8.35297356486226	7.40668714208803	5.01287349216455e-05	0.00278942775799156	-0.120016660752984	-0.0675142093872706	0.0112253958835166
chr13:39192196	AL354809.1	-	0.53757438185819	0.626915082763629	-0.0893407009054393	-4.31266113554133	10.2133314173828	0.00145793377037514	0.0204270813108564	-0.135368272696479	-0.0433131291143994	0.0207159102228479
chr13:39223428	LHFPL6	+	0.647730462014181	0.765150973264563	-0.117420511250383	-10.0257702236819	14.3431608610353	7.27148629993186e-08	7.63108279393887e-05	-0.142483707470657	-0.0923573150301089	0.0117118693756838
chr13:39509366	LHFPL6	-	0.591056671090651	0.693255912286305	-0.102199241195654	-6.43688794594191	9.98262897103507	7.53095565256007e-05	0.00353595438244955	-0.137584014790905	-0.0668144676004039	0.0158771198215568
chr13:41340430	NAA16	-	0.60983617131063	0.520891726319496	0.0889444449911332	6.2661564741263	10.4350507168295	7.72381409706793e-05	0.00358769625938475	0.0574951337266143	0.120393756255652	0.0141944181187296
chr13:43401991	ENOX1	+	0.543249938646852	0.626708744574566	-0.0834588059277138	-7.47162204451336	14.8604287291669	2.09295786318762e-06	0.00044672242038427	-0.10728681288675	-0.0596307989686776	0.0111701054242968
chr13:43626955	AL161714.1	-	0.62260574883861	0.722408963585434	-0.0998032147468237	-8.38001760281691	7.2877709379303	5.38299995317514e-05	0.00290266754331655	-0.127741234066701	-0.0718651954269469	0.0119096664800889
chr13:43626955	ENOX1	-	0.62260574883861	0.722408963585434	-0.0998032147468237	-8.38001760281691	7.2877709379303	5.38299995317514e-05	0.00290266754331655	-0.127741234066701	-0.0718651954269469	0.0119096664800889
chr13:43940353	AL512506.3	-	0.631001975079891	0.71740988816662	-0.0864079130867289	-7.64161983165911	17.1587117003023	6.37906898810443e-07	0.000232025481722736	-0.110247936202698	-0.0625678899707599	0.0113075388451991
chr13:43940353	NRAD1	-	0.631001975079891	0.71740988816662	-0.0864079130867289	-7.64161983165911	17.1587117003023	6.37906898810443e-07	0.000232025481722736	-0.110247936202698	-0.0625678899707599	0.0113075388451991
chr13:43972972	AL512506.3	-	0.663056663833061	0.747252747252747	-0.084196083419686	-7.93284168033361	15.1149550824274	9.07555315870059e-07	0.000279952542119183	-0.10680348046315	-0.0615886863762224	0.0106136094494886
chr13:43972972	NRAD1	-	0.663056663833061	0.747252747252747	-0.084196083419686	-7.93284168033361	15.1149550824274	9.07555315870059e-07	0.000279952542119183	-0.10680348046315	-0.0615886863762224	0.0106136094494886
chr13:44029586	NRAD1	-	0.60053220668089	0.685154744056543	-0.0846225373756527	-4.1151010979046	8.68244713251125	0.00282540858342208	0.0305347768637226	-0.131401964140564	-0.0378431106107412	0.0205639024078272
chr13:44457798	AL139184.1	+	0.536626947647442	0.437240537240537	0.0993864104069052	6.75150947810391	8.30572357062243	0.000121763536995752	0.0046833431498963	0.0656568661670023	0.133115954646808	0.014720620733664
chr13:44457798	TSC22D1	+	0.536626947647442	0.437240537240537	0.0993864104069052	6.75150947810391	8.30572357062243	0.000121763536995752	0.0046833431498963	0.0656568661670023	0.133115954646808	0.014720620733664
chr13:45242239	GTF2F2	-	0.365655908131278	0.276481481481481	0.0891744266497961	3.64401228760796	10.6439056234377	0.00407109528062915	0.03816790431604	0.0350923637763399	0.143256489523252	0.0244714944988105
chr13:46076558	CPB2	+	0.419390369038538	0.569318977591036	-0.149928608552498	-6.71525833079655	15.645892811027	5.57127735929656e-06	0.000779088765445446	-0.197346007582948	-0.102511209522048	0.022326558587466
chr13:46076558	CPB2-AS1	+	0.419390369038538	0.569318977591036	-0.149928608552498	-6.71525833079655	15.645892811027	5.57127735929656e-06	0.000779088765445446	-0.197346007582948	-0.102511209522048	0.022326558587466
chr13:46107631	CPB2-AS1	-	0.510131333235048	0.800159587001692	-0.290028253766644	-8.76662987524365	10.3016538927999	4.27401567605372e-06	0.000669209627873199	-0.363450702011911	-0.216605805521377	0.0330832096134985
chr13:46111978	CPB2-AS1	+	0.612167408810846	0.723512013180878	-0.111344604370033	-6.54873856063573	8.15950016290873	0.000163730923474689	0.00556228733263021	-0.150419319294947	-0.0722698894451184	0.0170024506764283
chr13:46112902	CPB2-AS1	+	0.641247646992505	0.72255382725304	-0.0813061802605347	-4.73405679336291	7.12104898474273	0.0020260887979136	0.0249209645733872	-0.121778451613958	-0.040833908907111	0.0171747369770732
chr13:50055449	DLEU2	-	0.633029774395165	0.73607310101563	-0.103043326620465	-8.03082756589826	9.89514226477552	1.21422901405272e-05	0.00121154198293423	-0.131673633222275	-0.0744130200186557	0.012830972371767
chr13:50103290	DLEU2	+	0.616501259307868	0.725125049400412	-0.108623790092544	-4.72432346319852	17.9054103470837	0.000171476168396652	0.00571790410406657	-0.156947441548174	-0.0603001386369135	0.0229924540389116
chr13:50103290	DLEU1	+	0.616501259307868	0.725125049400412	-0.108623790092544	-4.72432346319852	17.9054103470837	0.000171476168396652	0.00571790410406657	-0.156947441548174	-0.0603001386369135	0.0229924540389116
chr13:50116609	DLEU2	+	0.37777629730582	0.295051237007759	0.0827250602980609	5.8239974684106	12.0081545651676	8.13984549326333e-05	0.00370326233052151	0.051779159423306	0.113670961172816	0.0142041717474573
chr13:50116609	DLEU1	+	0.37777629730582	0.295051237007759	0.0827250602980609	5.8239974684106	12.0081545651676	8.13984549326333e-05	0.00370326233052151	0.051779159423306	0.113670961172816	0.0142041717474573
chr13:51653367	WDFY2	-	0.643313504331498	0.76381048145754	-0.120496977126042	-6.42774522056877	9.95590379453023	7.71231811075833e-05	0.00358572962036086	-0.162291613149038	-0.0787023411030452	0.0187463835281541
chr13:52205436	AL158066.1	-	0.511604237654658	0.595436507936508	-0.0838322702818501	-3.82796016235349	13.717563965506	0.00191045618959866	0.0240480351305336	-0.13089395867151	-0.0367705818921898	0.021899985038065
chr13:52227998	AL158066.1	-	0.563536949262464	0.64758618990118	-0.0840492406387169	-5.41095683736845	11.4089399316796	0.000187610761211554	0.00602844806409449	-0.118088569974708	-0.0500099113027259	0.0155331567345477
chr13:52227998	TPTE2P2	-	0.563536949262464	0.64758618990118	-0.0840492406387169	-5.41095683736845	11.4089399316796	0.000187610761211554	0.00602844806409449	-0.118088569974708	-0.0500099113027259	0.0155331567345477
chr13:52563224	AL137058.1	-	0.571470770316221	0.705102587011816	-0.133631816695596	-7.17796376931262	8.55035427278196	6.76403172835231e-05	0.00330833681890614	-0.176086322450564	-0.0911773109406272	0.0186169533575665
chr13:53385663	AL356295.1	+	0.516920614399606	0.61665785195197	-0.0997372375523636	-3.90523355349818	9.44018607997762	0.00327632364534796	0.0334383341249236	-0.157103268044234	-0.0423712070604933	0.0255393784228404
chr13:53385663	AL450423.1	+	0.516920614399606	0.61665785195197	-0.0997372375523636	-3.90523355349818	9.44018607997762	0.00327632364534796	0.0334383341249236	-0.157103268044234	-0.0423712070604933	0.0255393784228404
chr13:53688645	AL356295.1	+	0.523754335136731	0.607112143102855	-0.0833578079661239	-4.27717418359367	7.3641294989605	0.00326426710853581	0.0333617959228506	-0.128984014561343	-0.0377316013709052	0.0194889907186541
chr13:53762878	AL356295.1	+	0.599664822461883	0.712420252381889	-0.112755429920007	-10.5785481503747	10.1795940176605	8.15807830420673e-07	0.000264429287284746	-0.136448212381908	-0.0890626474581049	0.01065887570933
chr13:55097665	LINC02335	+	0.480562448929598	0.563951106390623	-0.0833886574610241	-4.61031572398957	17.9270237821999	0.000219399454017996	0.00662002624373508	-0.121399980797644	-0.0453773341244043	0.0180874071220578
chr13:55124676	LINC02335	-	0.51600351186065	0.606128747795414	-0.0901252359347645	-3.93078383849359	13.6648857830727	0.00157442308256468	0.0214133617028165	-0.139414408646321	-0.0408360632232085	0.0229280570079131
chr13:55541267	AL354821.1	+	0.416073036192344	0.517330088151855	-0.101257051959511	-3.90448722869027	7.45993692399679	0.00517667857627179	0.044120484251494	-0.161821873471966	-0.0406922304470565	0.0259335083018001
chr13:58218985	LINC00374	+	0.556951589825833	0.64433399044383	-0.0873824006179972	-6.91532542699676	17.1472921424349	2.38390936005378e-06	0.000482827176027999	-0.114024702729892	-0.0607400985061021	0.0126360503985633
chr13:58230621	LINC00374	+	0.605455929680036	0.697971781305115	-0.0925158516250785	-5.51047829769766	17.295706664363	3.59349687880161e-05	0.00229474857020197	-0.12789163349823	-0.057140069751927	0.0167890783026462
chr13:60052735	DIAPH3	+	0.648117979249116	0.734530991883933	-0.0864130126348172	-4.0029837523683	7.65282076716679	0.00430664310200712	0.0394957059808533	-0.136588917159919	-0.0362371081097151	0.0215871504808612
chr13:60689101	LINC00378	-	0.477669167993735	0.605579975579976	-0.127910807586241	-4.6673909520799	5.38221257371555	0.00455593454516292	0.0408683481786359	-0.196879683075633	-0.0589419320968486	0.0274052053705166
chr13:60966961	LINC00378	-	0.627937639345306	0.717266882858281	-0.0893292435129751	-3.96020936932887	6.82630957440687	0.0057437338706417	0.046973096088572	-0.142943712339919	-0.0357147746860309	0.0225566971799053
chr13:61039767	LINC00378	-	0.621058036294708	0.721995596995597	-0.100937560700889	-4.37703950478435	10.4397046974151	0.00124957906545881	0.0185946503977236	-0.152028142661032	-0.0498469787407458	0.0230606921848794
chr13:61423607	AL592490.1	-	0.58001818281537	0.709694989106754	-0.129676806291384	-4.0902967986469	8.45081023442964	0.00310190457840143	0.032321029476533	-0.202111940331661	-0.0572416722511065	0.0317035199827754
chr13:62555850	AL445668.1	+	0.622641267876699	0.705858726888672	-0.0832174590119734	-6.13948677476916	12.326377488115	4.47294011904848e-05	0.00260939668590254	-0.112663606955123	-0.0537713110688239	0.0135544650660319
chr13:63035592	AL354810.1	+	0.474496449297422	0.592849960497019	-0.118353511199597	-4.58747223293307	7.98252947030062	0.00179461948579727	0.0231821169564046	-0.177869444776643	-0.058837577622551	0.0257992866637857
chr13:63315231	LINC00376	+	0.578680499394785	0.668663279575751	-0.0899827801809659	-7.92390185926033	16.2872030731293	5.56365080782197e-07	0.000215827748091119	-0.114021689673085	-0.0659438706888474	0.0113558675737266
chr13:65902561	LINC01052	-	0.596988824667396	0.718020461507304	-0.121031636839907	-11.4338176522913	16.3823644197473	3.17954777228379e-09	1.79488015383638e-05	-0.143429210065035	-0.09863406361478	0.0105854090488887
chr13:66370460	PCDH9	-	0.565426588943223	0.661499783394511	-0.0960731944512875	-5.84520791525587	8.28823753466856	0.000336443725109177	0.0085337614432584	-0.133747000692494	-0.0583993882100814	0.0164362321826976
chr13:67213264	PCDH9	+	0.618031991586298	0.708524083033887	-0.0904920914475894	-7.25230251883465	11.969140184868	1.0261573323276e-05	0.00110625123789107	-0.117686451382669	-0.0632977315125094	0.012477705006455
chr13:67589876	AL512452.1	+	0.547321914898184	0.648363400627124	-0.10104148572894	-4.78594135002383	6.9487300957606	0.00203937418149756	0.0250165422878821	-0.151038541549848	-0.0510444299080315	0.0211121445791301
chr13:67705530	AL512452.1	+	0.560728564361047	0.650023342670402	-0.0892947783093544	-5.32389892836892	11.4982810323117	0.000209392489207821	0.00643390677649296	-0.126016425509132	-0.0525731311095773	0.0167724405573401
chr13:67832190	NPM1P22	-	0.630041437371543	0.718977367661578	-0.0889359302900349	-3.61473392580385	13.4287290193042	0.00299343059030717	0.0316307431167193	-0.141917064060131	-0.0359547965199391	0.0246037279964547
chr13:68026227	AL590027.1	-	0.520137592246415	0.603938586997798	-0.0838009947513821	-4.1729987358365	9.98762396223499	0.00191396542909762	0.024068164728255	-0.12855337330314	-0.039048616199624	0.0200817206177715
chr13:69781707	KLHL1	-	0.562197996088156	0.686769490260951	-0.124571494172795	-5.21514721673323	15.3091232586204	9.80047150155624e-05	0.00413672319699392	-0.175394921914506	-0.0737480664310839	0.0238864770246748
chr13:69842376	KLHL1	+	0.639791072368419	0.735930591961125	-0.0961395195927059	-8.43963731536702	16.9214251404527	1.81057243400606e-07	0.000121099836916575	-0.120181835711174	-0.0720972034742379	0.011391427854092
chr13:69908542	KLHL1	+	0.588358980569286	0.699451754385965	-0.111092773816679	-5.10394997845385	10.4450460899772	0.000402375727241335	0.0094972704138326	-0.15931188591531	-0.0628736617180483	0.0217660389082286
chr13:70018869	KLHL1	+	0.527876984126984	0.644678280668993	-0.116801296542009	-5.47806087287344	7.75458888593151	0.0006553275649001	0.0126833447504946	-0.166241277908856	-0.0673613151751608	0.0213216499875698
chr13:70056977	KLHL1	+	0.55664415206141	0.646230158730159	-0.0895860066687489	-5.21313100509777	7.69437857333183	0.000916270186456853	0.0154833160836362	-0.129489617553194	-0.0496823957843041	0.0171846835579511
chr13:71592371	DACH1	+	0.530939556623857	0.615949328449328	-0.0850097718254712	-5.82225445555154	12.5205834152486	6.9128985142884e-05	0.00335308042940663	-0.116676173584671	-0.0533433700662712	0.0146008341741942
chr13:73507495	LINC00393	-	0.610702035107435	0.695569633112737	-0.0848675980053012	-7.08804570011017	17.6071715547009	1.48992563245987e-06	0.00036980079974	-0.110062945783997	-0.0596722502266057	0.0119733423846268
chr13:73584176	LINC00393	+	0.551641006052771	0.719287518037518	-0.167646511984747	-7.00607040787628	11.7495461350473	1.59094184514748e-05	0.00141942628511903	-0.219906305861342	-0.115386718108152	0.0239287506725992
chr13:73584176	LINC00392	+	0.551641006052771	0.719287518037518	-0.167646511984747	-7.00607040787628	11.7495461350473	1.59094184514748e-05	0.00141942628511903	-0.219906305861342	-0.115386718108152	0.0239287506725992
chr13:74525027	AL355390.2	-	0.564957408623089	0.649300856307435	-0.0843434476843462	-6.0063524791236	6.89201862344765	0.000571704734973093	0.0116932430155879	-0.117654139700265	-0.0510327556684274	0.0140423739661467
chr13:75664111	AL137782.1	-	0.666616399524237	0.770225451291628	-0.103609051767391	-9.40749401268887	17.9528222534556	2.3205801194155e-08	4.53365144548194e-05	-0.126751830233599	-0.0804662733011839	0.011013459230231
chr13:75664111	LMO7	-	0.666616399524237	0.770225451291628	-0.103609051767391	-9.40749401268887	17.9528222534556	2.3205801194155e-08	4.53365144548194e-05	-0.126751830233599	-0.0804662733011839	0.011013459230231
chr13:76834715	AL136441.1	+	0.608968854439427	0.708665603402445	-0.0996967489630181	-5.09846008891573	7.59639209725276	0.00109243747350985	0.0171872484900935	-0.145209463124696	-0.0541840348013397	0.019554286436362
chr13:76834715	AL365394.1	+	0.608968854439427	0.708665603402445	-0.0996967489630181	-5.09846008891573	7.59639209725276	0.00109243747350985	0.0171872484900935	-0.145209463124696	-0.0541840348013397	0.019554286436362
chr13:77146546	MYCBP2	+	0.657534783532683	0.752014664886265	-0.0944798813535824	-13.8306381260999	16.7666704423859	1.35019595550142e-10	3.07337265503305e-06	-0.108907751290675	-0.0800520114164903	0.00683120189337387
chr13:78328307	OBI1-AS1	-	0.594805767847459	0.675519660609764	-0.080713892762305	-4.29953191357102	7.66902667326981	0.00288725042198836	0.0309349512066651	-0.124331218243906	-0.0370965672807038	0.0187727162827982
chr13:78433118	OBI1-AS1	-	0.558675847961562	0.646473055082895	-0.0877972071213327	-5.36616379753321	12.958006853857	0.000129815824221591	0.00485283065545094	-0.123155210443801	-0.0524392037988643	0.0163612611232055
chr13:78559172	OBI1-AS1	-	0.541227847414269	0.649698340874811	-0.108470493460542	-4.95917147475904	8.92682295477856	0.000800624852105447	0.0142912882931225	-0.158011886843636	-0.0589291000774482	0.0218727047476842
chr13:82857740	AL445255.1	-	0.525715729942529	0.678201412114456	-0.152485682171926	-5.64680659558331	9.73241274676768	0.000235982231943618	0.00690313084476971	-0.212879067227925	-0.0920922971159278	0.0270038790227372
chr13:84217769	AL162493.1	+	0.487617400360367	0.604552653465697	-0.11693525310533	-5.56743705712488	14.2354237702029	6.52356325096354e-05	0.00324104383200286	-0.161913329261136	-0.0719571769495242	0.0210034261556101
chr13:84221669	AL162493.1	+	0.428655680773107	0.511936493874275	-0.0832808131011683	-4.61681336689007	16.3139555047384	0.0002722984391648	0.00751704976800804	-0.12146119733072	-0.0451004288716168	0.0180385920943707
chr13:84270263	AL162493.1	-	0.467509398579024	0.565107664543755	-0.0975982659647311	-9.50108721861899	14.5653931942414	1.2546584657913e-07	0.000101065174258978	-0.119550249480766	-0.0756462824486966	0.0102723260737435
chr13:85445314	LINC00351	-	0.629466106913802	0.716214325992084	-0.0867482190782819	-7.04285705051069	6.80454911003142	0.000232218427460981	0.00683926948560533	-0.116044201706055	-0.0574522364505086	0.0123171915113614
chr13:85454028	LINC00351	-	0.63311444314172	0.725370246084984	-0.0922558029432634	-9.08221445544613	17.8479480380587	4.13260013073039e-08	5.75236508038006e-05	-0.113609700472414	-0.0709019054141128	0.0101578533953184
chr13:86108236	AL354994.1	-	0.631798788599411	0.717137845814316	-0.0853390572149055	-6.35290392522563	17.6985292155324	5.97063113564122e-06	0.000810532625568276	-0.113595405287462	-0.0570827091423488	0.0134330785132839
chr13:87449785	MIR4500HG	+	0.561201858365724	0.644721847353426	-0.0835199889877024	-4.16897705289248	13.344313947631	0.00104359801320272	0.0167181094271318	-0.126686897231517	-0.0403530807438883	0.0200336888229585
chr13:87449785	AL360267.2	+	0.561201858365724	0.644721847353426	-0.0835199889877024	-4.16897705289248	13.344313947631	0.00104359801320272	0.0167181094271318	-0.126686897231517	-0.0403530807438883	0.0200336888229585
chr13:87637705	MIR4500HG	+	0.536614972329258	0.65893175451999	-0.122316782190732	-4.89101759259465	11.2860789916976	0.000443977676364642	0.010070272827437	-0.177190266111934	-0.0674432982695294	0.0250084527146106
chr13:88210384	LINC00373	+	0.558475403008688	0.642047157871966	-0.0835717548632782	-5.52545057321456	12.3438294440816	0.000118068184316667	0.00460294867669675	-0.116424510215675	-0.050718999510881	0.0151248760179676
chr13:88567125	AL445984.2	+	0.607437205651491	0.701231009011329	-0.093793803359838	-5.81447211158204	12.3373425453512	7.42185189047421e-05	0.00350519942355583	-0.128834149647051	-0.0587534570726252	0.0161310952327051
chr13:88567125	LINC00433	+	0.607437205651491	0.701231009011329	-0.093793803359838	-5.81447211158204	12.3373425453512	7.42185189047421e-05	0.00350519942355583	-0.128834149647051	-0.0587534570726252	0.0161310952327051
chr13:89192286	LINC00440	-	0.518355655459284	0.399264010929715	0.119091644529569	7.52624599508308	16.5380669495384	9.86265426553387e-07	0.00029302880179621	0.0856357775531536	0.152547511505984	0.0158235120945252
chr13:89262194	LINC00440	-	0.596999709935021	0.68	-0.0830002900649786	-4.48425995135179	7.84798179432447	0.00214456949388728	0.0257900590490167	-0.125827038091931	-0.0401735420380265	0.0185092503479772
chr13:89430238	LINC02336	-	0.60674133884725	0.705037409700722	-0.0982960708534721	-6.3307619024772	14.4374527756881	1.610428986007e-05	0.00142946911921441	-0.131503192937329	-0.0650889487696149	0.0155267363340595
chr13:89494148	LINC01040	-	0.616832242851095	0.723545949205178	-0.106713706354084	-7.76005664944738	11.2805088332633	7.48469500960623e-06	0.000924625833876662	-0.13688934435639	-0.076538068351777	0.0137516658930168
chr13:89494148	LINC02336	-	0.616832242851095	0.723545949205178	-0.106713706354084	-7.76005664944738	11.2805088332633	7.48469500960623e-06	0.000924625833876662	-0.13688934435639	-0.076538068351777	0.0137516658930168
chr13:89497190	LINC01040	+	0.503518073896225	0.60720695970696	-0.103688885810735	-7.55108883498006	9.42969161573983	2.70514510183228e-05	0.00194193047891108	-0.134537592271941	-0.0728401793495284	0.0137316469289039
chr13:89497190	LINC02336	+	0.503518073896225	0.60720695970696	-0.103688885810735	-7.55108883498006	9.42969161573983	2.70514510183228e-05	0.00194193047891108	-0.134537592271941	-0.0728401793495284	0.0137316469289039
chr13:89552449	LINC00353	+	0.595855178187066	0.679271708683473	-0.0834165304964075	-4.66466885533374	9.97912844236604	0.000892958245122991	0.0152371675887448	-0.123272804230482	-0.0435602567623326	0.0178826264164553
chr13:89552449	LINC02336	+	0.595855178187066	0.679271708683473	-0.0834165304964075	-4.66466885533374	9.97912844236604	0.000892958245122991	0.0152371675887448	-0.123272804230482	-0.0435602567623326	0.0178826264164553
chr13:91865590	GPC5	-	0.608593482580312	0.690092218510935	-0.0814987359306222	-5.02902256121633	10.1775719412754	0.00048786081651905	0.0106593978835128	-0.117522030154133	-0.0454754417071111	0.0162056811117011
chr13:91971283	GPC5	-	0.507125350140056	0.614926380808734	-0.107801030668678	-3.86072250212644	10.6626750322283	0.0028048938342524	0.0303913003595032	-0.169496088590604	-0.0461059727467514	0.0279225017103151
chr13:92008428	GPC5	-	0.621962508779736	0.70640230352874	-0.0844397947490046	-4.59382498324103	12.0004013886061	0.000617434125360096	0.0122520564974261	-0.124488735730607	-0.0443908537674027	0.0183811518847701
chr13:92140281	GPC5	+	0.608437397863777	0.707272365161505	-0.0988349672977281	-5.82365786489972	11.685390662622	9.07389648825363e-05	0.00394332652375959	-0.13592294257749	-0.0617469920179658	0.0169712867051179
chr13:94077308	GPC6	-	0.628714253406579	0.73103938545115	-0.102325132044571	-3.31774439623605	17.720975703663	0.00389254582191201	0.0371248151142768	-0.167194508587423	-0.0374557555017192	0.0308417767687764
chr13:94734590	SOX21-AS1	-	0.568091960949104	0.650762717674482	-0.0826707567253785	-4.78959234145747	17.9785931611276	0.000147151707043207	0.00522600004023521	-0.118936815982345	-0.0464046974684124	0.0172604996065744
chr13:94761147	SOX21-AS1	-	0.418107812888326	0.503551264679313	-0.0854434517909877	-6.98269804996627	11.9056037263774	1.53232645955668e-05	0.00138926272811163	-0.112127854793057	-0.0587590487889188	0.0122364523253874
chr13:95579621	CLDN10	+	0.601920304785493	0.717810941495152	-0.115890636709659	-7.16656123377838	15.3813734681896	2.81210931617158e-06	0.000529152735284462	-0.150284074427935	-0.0814971989913841	0.0161710244187168
chr13:95579621	DZIP1	+	0.601920304785493	0.717810941495152	-0.115890636709659	-7.16656123377838	15.3813734681896	2.81210931617158e-06	0.000529152735284462	-0.150284074427935	-0.0814971989913841	0.0161710244187168
chr13:95658393	DNAJC3-DT	-	0.624946031598238	0.717231992066298	-0.0922859604680594	-7.60350475283428	14.1633962181048	2.2911285811098e-06	0.000470911315118778	-0.118289717135179	-0.0662822038009395	0.0121372924023831
chr13:95908058	UGGT2	+	0.597821828133301	0.695216588966589	-0.0973947608332884	-5.06154918134555	8.03444923516596	0.000962474259129908	0.0159313986357291	-0.141733994382171	-0.0530555272844054	0.0192420852477812
chr13:96329160	HS6ST3	-	0.549779532312005	0.70801250193813	-0.158232969626124	-6.35063736251251	17.8824968139307	5.71334835650902e-06	0.000791502336340722	-0.210604370935473	-0.105861568316776	0.0249160770161693
chr13:96391174	HS6ST3	-	0.62368234041575	0.705415713196033	-0.0817333727802835	-5.04013071905861	9.20705209330326	0.000652622788584917	0.0126534823503214	-0.118292315317202	-0.0451744302433651	0.0162165184468766
chr13:96463284	HS6ST3	+	0.592129882255933	0.683373205741627	-0.0912433234856941	-5.83202238759719	13.6634572857351	4.7988001217711e-05	0.00271874855393493	-0.124876707201076	-0.0576099397703119	0.0156452286053872
chr13:96714201	HS6ST3	+	0.524887958959555	0.627863016543676	-0.102975057584121	-5.96330754611503	10.5127769840177	0.000113239413632965	0.00449236485292052	-0.141197931796788	-0.0647521833714542	0.0172681111594198
chr13:96736959	HS6ST3	+	0.563753915657308	0.645383408614573	-0.081629492957265	-6.26274865495874	11.6717958322031	4.72478907322099e-05	0.00269676480773791	-0.110117248300518	-0.053141737614012	0.0130341320488141
chr14:101011387	MEG8	-	0.649348059604812	0.742192265396124	-0.092844205791312	-5.1604436257986	8.06711715250615	0.000840801929734896	0.0147081974735605	-0.134272710734722	-0.0514157008479022	0.0179915163353701
chr14:101692388	LINC02320	+	0.661289898734613	0.75683729456108	-0.0955473958264663	-5.90308206892814	17.7559569919087	1.45400886424057e-05	0.00134719088926976	-0.129586491621523	-0.0615083000314093	0.0161860185426518
chr14:103039394	CDC42BPB	+	0.63940871220283	0.736147741147741	-0.0967390289449114	-4.84028065894374	9.75103974934241	0.000732147046308777	0.0135390619080854	-0.14142575311487	-0.0520523047749525	0.0199862437245575
chr14:104242082	LINC02691	+	0.577216011783635	0.495469734943419	0.0817462768402161	7.78643921858886	17.9415461054163	3.67428774873178e-07	0.000175776680378058	0.0596845017127922	0.10380805196764	0.0104985442697684
chr14:104490292	TMEM179	+	0.613053706944684	0.697269673862811	-0.0842159669181267	-4.72891709545466	8.89811030525437	0.00110965447766892	0.0173470476616135	-0.124572522527711	-0.0438594113085427	0.0178087213664781
chr14:104498048	TMEM179	+	0.56118684581754	0.670242493132519	-0.109055647314979	-5.65419334367286	11.0241990998342	0.000146676108493613	0.00521619775309397	-0.151495935251769	-0.0666153593781884	0.0192875695411112
chr14:18334920	CR383658.1	+	0.617915967553608	0.703018097835869	-0.0851021302822614	-6.04776188725628	6.10053211282809	0.000869978555417228	0.0150060439041088	-0.119397198383315	-0.0508070621812083	0.0140716734337023
chr14:18974825	POTEM	-	0.514361525617999	0.60863448849985	-0.0942729628818504	-6.799945339081	13.1723678426337	1.17957580851624e-05	0.00119213688863128	-0.124184052412558	-0.0643618733511426	0.0138637824542559
chr14:19727895	OR4N2	-	0.586004829538411	0.668171617835599	-0.0821667882971878	-7.93321849370332	15.8039048185909	6.71945941143218e-07	0.000238625351876495	-0.104145463162856	-0.0601881134315193	0.0103573081168008
chr14:19742298	OR4N2	+	0.493648766715737	0.576482387008703	-0.0828336202929654	-4.76849078806837	7.76145147188909	0.00153467021690416	0.0210741645293498	-0.123106616542006	-0.0425606240439246	0.0173710349824372
chr14:19767301	OR4N2	-	0.522720111688854	0.425746491833448	0.0969736198554061	5.34677396243201	11.1461124634359	0.00022461404218645	0.00670795717870703	0.0571184412620135	0.136828798448799	0.0181368467297797
chr14:21263071	HNRNPC	+	0.61185853910889	0.694639280343951	-0.0827807412350611	-4.66653746645581	9.84968354905563	0.000922108804779189	0.0155414108118653	-0.122388105183295	-0.0431733772868272	0.0177392213884725
chr14:24286302	AL096870.10	-	0.334139795655718	0.149439799331104	0.184699996324614	4.94666702187275	11.5186075642045	0.000381936861573607	0.00920814053740682	0.102968199926899	0.26643179272233	0.0373382715084568
chr14:24404388	NYNRIN	-	0.613790369780168	0.697153772942349	-0.0833634031621808	-5.68874243282992	13.3816365889127	6.65240087700295e-05	0.00327699137751745	-0.114930126906989	-0.0517966794173722	0.0146541004706221
chr14:25720327	LINC02306	-	0.597148469047487	0.69067887109077	-0.0935304020432838	-7.64741537162862	12.2790621603239	5.17335028327593e-06	0.000743936626684208	-0.120110985485316	-0.066949818601252	0.0122303284833037
chr14:26100051	LINC02306	-	0.632529854046882	0.720216105765978	-0.0876862517190959	-4.04531486628894	9.61049612477614	0.00253888845265689	0.0285609604277014	-0.136250040129181	-0.039122463309011	0.0216760016506544
chr14:26552322	NOVA1	+	0.450496402707814	0.532010582010582	-0.0815141793027684	-3.81812805005109	7.56227215057482	0.0056704084112731	0.0466066047579259	-0.131246106094941	-0.0317822525105958	0.0213492523650897
chr14:26892701	MIR4307HG	-	0.520807780994793	0.616601498859563	-0.0957937178647706	-7.6191696673489	12.9527178530233	3.88414064758358e-06	0.000634460774340997	-0.122965519230793	-0.0686219164987487	0.0125727240693017
chr14:26892701	AL110292.1	-	0.520807780994793	0.616601498859563	-0.0957937178647706	-7.6191696673489	12.9527178530233	3.88414064758358e-06	0.000634460774340997	-0.122965519230793	-0.0686219164987487	0.0125727240693017
chr14:26916559	MIR4307HG	-	0.456088634039976	0.543316798941799	-0.0872281649018231	-6.3923997570514	12.3543133222566	3.0067294154342e-05	0.00206005069840819	-0.116865090716478	-0.0575912390871679	0.0136456054403673
chr14:26916559	AL110292.1	-	0.456088634039976	0.543316798941799	-0.0872281649018231	-6.3923997570514	12.3543133222566	3.0067294154342e-05	0.00206005069840819	-0.116865090716478	-0.0575912390871679	0.0136456054403673
chr14:26920733	AL110292.1	+	0.583037505766844	0.664518908475055	-0.0814814027082119	-4.29428345527775	6.61406424998703	0.00409491033762365	0.0382990755784146	-0.126884921734439	-0.036077883681985	0.0189743885229723
chr14:27066481	AL110292.1	-	0.539747391074892	0.379503633075062	0.16024375799983	16.4059744071586	16.2589806011749	1.53047616326081e-11	7.7139824818753e-07	0.139564561934471	0.180922954065189	0.00976740265606592
chr14:27247454	AL110292.1	-	0.656305773377505	0.739799377671231	-0.0834936042937263	-5.94531358382021	12.3094501226105	6.08954201637215e-05	0.00311394670353936	-0.11400688331747	-0.0529803252699823	0.0140435997389522
chr14:27380073	AL390334.1	+	0.543681661412296	0.639816791777576	-0.0961351303652798	-8.26813181528146	10.8181896415883	5.3156452906045e-06	0.000755013157132791	-0.12177897173753	-0.0704912889930298	0.0116271888877726
chr14:27611043	AL390334.1	+	0.545651313438313	0.632284993866703	-0.0866336804283903	-5.49746526164199	8.60392899627365	0.000446685406987342	0.0101112134590676	-0.12253438569018	-0.0507329751666006	0.0157588409030737
chr14:27631711	LINC00645	+	0.534008885716297	0.643722816136609	-0.109713930420312	-7.41997646302792	8.57712831866843	5.19214353239491e-05	0.00284630789091691	-0.143415922651005	-0.0760119381896196	0.0147862908955294
chr14:27631711	AL390334.1	+	0.534008885716297	0.643722816136609	-0.109713930420312	-7.41997646302792	8.57712831866843	5.19214353239491e-05	0.00284630789091691	-0.143415922651005	-0.0760119381896196	0.0147862908955294
chr14:27660009	AL390334.1	-	0.644412764937062	0.72816054094165	-0.0837477760045888	-4.7042597512529	12.9288875385339	0.000418110551303259	0.00971623378458341	-0.122229341932561	-0.0452662100766163	0.0178025407679251
chr14:28406106	AL139023.1	+	0.577982813706237	0.699862205159319	-0.121879391453082	-7.91214423936092	16.7154347504525	4.75721872786801e-07	0.000198389449337418	-0.154421380933152	-0.0893374019730125	0.0154040912003048
chr14:28740357	FOXG1-AS1	-	0.637941339583312	0.72238060793048	-0.0844392683471679	-4.67576994429382	13.4525797567081	0.000396481539284349	0.00941260253246259	-0.123320149376469	-0.0455583873178668	0.0180589013901796
chr14:29050102	LINC02326	-	0.615619171992559	0.704216938496857	-0.0885977665042985	-6.76737153459475	9.56430738342499	6.12690009705224e-05	0.00312414077996409	-0.117949471693181	-0.0592460613154161	0.0130919022328518
chr14:29050102	AL135878.1	-	0.615619171992559	0.704216938496857	-0.0885977665042985	-6.76737153459475	9.56430738342499	6.12690009705224e-05	0.00312414077996409	-0.117949471693181	-0.0592460613154161	0.0130919022328518
chr14:29051667	LINC02326	+	0.421723787812992	0.504179323386641	-0.0824555355736487	-5.10738748875939	17.5773159009064	7.9122011459967e-05	0.00363934949198578	-0.116432149716838	-0.0484789214304598	0.0161443665191101
chr14:29051667	AL135878.1	+	0.421723787812992	0.504179323386641	-0.0824555355736487	-5.10738748875939	17.5773159009064	7.9122011459967e-05	0.00363934949198578	-0.116432149716838	-0.0484789214304598	0.0161443665191101
chr14:29111753	AL135878.1	-	0.458738244159278	0.560724132498326	-0.101985888339049	-5.12174244787667	17.6743730175213	7.54694019296244e-05	0.00354057917895157	-0.143875481784024	-0.0600962948940729	0.0199123422110631
chr14:29722802	PRKD1	+	0.656685374434529	0.73785005993244	-0.081164685497911	-9.6540237953505	16.6984597009947	3.04444138130607e-08	5.06666130683469e-05	-0.0989270593888514	-0.0634023116069706	0.00840734259811965
chr14:30061387	PRKD1	-	0.486602509724875	0.634286852517299	-0.147684342792424	-3.55589614410796	15.1120195928776	0.0028450912806204	0.0306671756354726	-0.236151105043043	-0.0592175805418048	0.0415322430147836
chr14:30061387	AL133372.2	-	0.486602509724875	0.634286852517299	-0.147684342792424	-3.55589614410796	15.1120195928776	0.0028450912806204	0.0306671756354726	-0.236151105043043	-0.0592175805418048	0.0415322430147836
chr14:30609635	G2E3	-	0.539797808382073	0.628267466012564	-0.0884696576304912	-4.69968902562749	12.1086201848616	0.000502289027351258	0.0108316336964429	-0.129444118055526	-0.0474951972054568	0.0188245769343598
chr14:30765796	AL121852.1	+	0.661184990190408	0.78769387638897	-0.126508886198562	-12.812321104161	15.0830528840732	1.6427638479545e-09	1.27383699763887e-05	-0.147544734709619	-0.105473037687506	0.00987400215543122
chr14:31540097	NUBPL	-	0.608881991024848	0.722886957813428	-0.11400496678858	-9.23450040500368	13.1491950530777	4.10670878026796e-07	0.000185283724435063	-0.140645172132597	-0.0873647614445631	0.012345547868167
chr14:32518424	AKAP6	+	0.658473911210712	0.798736153808618	-0.140262242597905	-4.18729471449821	11.1120004379637	0.0014850309791663	0.0206684466948034	-0.213898306890079	-0.0666261783057315	0.0334971030608993
chr14:32744466	AKAP6	-	0.657297970715706	0.741452013534393	-0.0841540428186872	-4.16445288306803	7.57459390709742	0.00354685882137978	0.0351100909660558	-0.131212595765297	-0.0370954898720774	0.020207706794053
chr14:32803700	AKAP6	-	0.621359302788643	0.703739316239316	-0.0823800134506728	-4.69415793528802	11.5623400110246	0.00057391927260026	0.0117187778783866	-0.120778181218822	-0.0439818456825237	0.0175494763035957
chr14:33004986	NPAS3	-	0.327700546621811	0.224062571888659	0.103637974733152	6.9639077659854	15.4365570655939	3.88605931778014e-06	0.000634460774340997	0.0719953607555563	0.135280588710748	0.0148821578653529
chr14:34414904	EGLN3	+	0.665451280990865	0.758485611610612	-0.0930343306197463	-8.74607297829903	17.9505086168271	6.88024124049004e-08	7.42345417084586e-05	-0.115386820843489	-0.0706818403960031	0.0106372689606622
chr14:34755874	BAZ1A	-	0.424575974921597	0.276196320928563	0.148379653993034	3.46282407384898	11.6577859306578	0.00488670451216795	0.04263608640387	0.0547141420290277	0.24204516595704	0.0428493191766764
chr14:35948159	AL133304.3	+	0.550708270066783	0.631868582526477	-0.0811603124596944	-6.91855961955605	9.54802834504052	5.16898595527392e-05	0.00283889897614392	-0.107466873447732	-0.0548537514716569	0.0117308105910204
chr14:35948159	AL133304.1	+	0.550708270066783	0.631868582526477	-0.0811603124596944	-6.91855961955605	9.54802834504052	5.16898595527392e-05	0.00283889897614392	-0.107466873447732	-0.0548537514716569	0.0117308105910204
chr14:36079549	LINC00609	+	0.580389874987042	0.669335946945882	-0.0889460719588404	-6.6714250536059	16.2718954177384	4.92611644966939e-06	0.000723722711006134	-0.11717115216806	-0.0607209917496205	0.0133323946899119
chr14:36410853	AL132857.2	+	0.588241025074958	0.673465423465423	-0.0852243983904658	-5.03624368798582	17.9853055748763	8.60484432294001e-05	0.00382020772061043	-0.120778735007823	-0.0496700617731081	0.0169222149821249
chr14:36413214	AL132857.2	+	0.650708181823454	0.733521303258145	-0.0828131214346913	-6.60909678282977	7.29993964027711	0.000251533476690493	0.00717085400219827	-0.112197258636722	-0.0534289842326609	0.0125301722997668
chr14:36619728	AL132857.2	-	0.45089727070358	0.540513960869998	-0.089616690166418	-3.84452026861352	10.790716794667	0.0028213323735552	0.0305061426511435	-0.141043847199363	-0.0381895331334735	0.0233102400052471
chr14:36897435	SLC25A21	-	0.523414542584711	0.608456610788308	-0.0850420682035972	-3.29745710186647	17.9904075738913	0.00400594405718965	0.0377808943968383	-0.139227332385921	-0.0308568040212736	0.0257901969840519
chr14:37218051	MIPOL1	-	0.419705647410479	0.502593108941571	-0.0828874615310917	-7.23413949707852	7.27460491610536	0.000143038089325632	0.00514044727075591	-0.109774943803461	-0.0559999792587222	0.0114578190764175
chr14:37540490	MIPOL1	-	0.654615847115847	0.739516815666241	-0.0849009685503939	-6.81566830267404	17.6024078611231	2.49659327173222e-06	0.000497510192967739	-0.111114032001727	-0.0586879050990605	0.0124567342159365
chr14:37757509	TTC6	-	0.626346706760241	0.719320534537926	-0.0929738277776853	-7.18380960825672	15.473760660851	2.63918969795271e-06	0.000511633339528146	-0.120485954639434	-0.0654617009159362	0.0129421341666441
chr14:37860725	TTC6	+	0.645626697530915	0.749525691699605	-0.10389899416869	-6.41723649424976	17.9998379485636	4.85051200964338e-06	0.000717264108372995	-0.137914232327315	-0.0698837560100656	0.0161906132432224
chr14:38286240	AL355835.1	+	0.529620402669361	0.617967676214803	-0.0883472735454413	-5.81387025851323	11.317409171	0.000104507721816608	0.00428820761086598	-0.121679240521569	-0.0550153065693137	0.0151959485879608
chr14:38894031	LINC00639	+	0.646679218530215	0.736495674312874	-0.089816455782659	-9.35405389258138	15.2834827235321	1.01945886075168e-07	9.19995913687569e-05	-0.11024935460785	-0.0693835569574679	0.00960187495326402
chr14:39820145	AL049828.1	-	0.54573254424084	0.654021417179312	-0.108288872938472	-4.73787338117112	10.6027665502139	0.000676510104065682	0.0129270257604633	-0.158825512459756	-0.0577522334171873	0.0228560082185448
chr14:39945094	AL049828.1	-	0.62463104122768	0.747740563530037	-0.123109522302357	-6.16235670822855	9.43767039142776	0.00013619172648515	0.00499035196535981	-0.167984683179715	-0.0782343614249998	0.0199776689554453
chr14:39961795	AL049828.1	+	0.470785301300007	0.572445820433437	-0.101660519133429	-4.28506598186319	7.61536843726647	0.00299069916559444	0.0316147358529061	-0.15685375081349	-0.0464672874533687	0.0237243766055678
chr14:40124588	AL049828.1	-	0.637333614952118	0.722418913693423	-0.0850852987413058	-6.1699552719913	7.4674074782462	0.000354372220963304	0.00880545961474192	-0.117284848820723	-0.0528857486618885	0.013790261839912
chr14:40762647	AL390800.1	-	0.657143220924734	0.754605739088498	-0.0974625181637642	-7.2584755816655	8.98954924290586	4.80159965029146e-05	0.00271986753649234	-0.127842810615143	-0.0670822257123853	0.0134274086985908
chr14:41082267	LINC02315	+	0.56265071480684	0.655434700057126	-0.0927839852502853	-5.04483422347504	6.91393266356742	0.00154436253806304	0.0211624228421927	-0.136383858863382	-0.0491841116371884	0.0183918799191726
chr14:41682642	LRFN5	+	0.521563732774895	0.606916297076879	-0.0853525643019836	-9.76670355466969	17.9607375294688	1.30930408795698e-08	3.26463176715733e-05	-0.103715688013636	-0.0669894405903314	0.00873913739924814
chr14:42262524	AL445074.1	-	0.586760655026017	0.466228070175439	0.120532584850579	3.40601465539876	14.8826413067543	0.00394735614785682	0.0374410927681392	0.045052673472191	0.196012496228966	0.0353881580220233
chr14:42422911	AL450442.1	-	0.579154311853026	0.683036210053754	-0.103881898200728	-6.56467488731396	16.7506153997552	5.18290280332325e-06	0.000744477201954347	-0.137306322278274	-0.0704574741231816	0.0158243782036299
chr14:42422911	AL442163.1	-	0.579154311853026	0.683036210053754	-0.103881898200728	-6.56467488731396	16.7506153997552	5.18290280332325e-06	0.000744477201954347	-0.137306322278274	-0.0704574741231816	0.0158243782036299
chr14:42620503	AL442163.1	-	0.554481950042295	0.650540935672515	-0.0960589856302198	-7.16155207845996	14.4576523484986	4.03871463321142e-06	0.000649022637259426	-0.12474213522948	-0.0673758360309591	0.0134131518667775
chr14:44179878	LINC02307	+	0.540098408647348	0.655546037102986	-0.115447628455637	-5.34462689034155	12.3709370174293	0.000157824316994515	0.0054411137885661	-0.162355450339817	-0.068539806571457	0.0216006899685114
chr14:46189572	LINC00871	+	0.556927333076401	0.644137043775327	-0.0872097106989251	-6.38889540805584	8.67798994161703	0.000148885095685319	0.00526087677633296	-0.118264159914223	-0.0561552614836275	0.0136502016591102
chr14:46332295	LINC00871	+	0.613179530798947	0.716910866910867	-0.10373133611192	-3.70337868587911	9.64949997237648	0.00434175003093245	0.0396888966928082	-0.166449971853621	-0.0410127003702188	0.0280099187553909
chr14:46947774	MDGA2	-	0.574087031268708	0.654210279119699	-0.0801232478509911	-4.19510873016862	9.12489596985728	0.00225383030718663	0.0265719031746915	-0.123238676751192	-0.0370078189507901	0.0190992064817759
chr14:46968884	MDGA2	+	0.520440809378467	0.602984270631329	-0.0825434612528626	-5.31012090460355	16.549836692482	6.29280811535891e-05	0.00316940859866637	-0.115407689856783	-0.0496792326489424	0.0155445540197216
chr14:47081027	MDGA2	-	0.615096305529593	0.726772085938753	-0.11167578040916	-10.5906652793595	17.0632495785681	6.38489216193206e-09	2.40930662068713e-05	-0.133916950565449	-0.0894346102528705	0.0105447370361905
chr14:47360207	MDGA2	+	0.611358536763081	0.70043624255367	-0.089077705790589	-7.71106184681824	10.7279494816064	1.07388035206356e-05	0.00113574274914324	-0.114582236831242	-0.0635731747499357	0.0115519376656724
chr14:48434401	AL358335.2	-	0.40981103527026	0.328860028860029	0.0809510064102308	3.46880164138093	12.5897921279428	0.00434204049595633	0.0396893581443486	0.0303672483019159	0.131534764518546	0.0233368796429664
chr14:49704125	KLHDC1	-	0.434852154312017	0.337356752211825	0.0974954021001925	4.28837704175203	7.38423520125167	0.00319770011943804	0.0329431647119406	0.0442980450538473	0.150692759146538	0.0227348018028658
chr14:50075379	LINC01588	+	0.623798546225017	0.719189390856057	-0.0953908446310406	-3.56204597266693	17.9978904932297	0.00222782358975988	0.0263847585431633	-0.151653569255488	-0.039128120006593	0.0267797904246645
chr14:52869899	FERMT2	+	0.627624899829869	0.771558302808303	-0.143933402978434	-9.96631109953275	9.3027117361797	2.86620415973566e-06	0.000532375354634133	-0.176442125957309	-0.111424679999559	0.0144419937869672
chr14:52869899	AL139317.5	+	0.627624899829869	0.771558302808303	-0.143933402978434	-9.96631109953275	9.3027117361797	2.86620415973566e-06	0.000532375354634133	-0.176442125957309	-0.111424679999559	0.0144419937869672
chr14:53180575	AL365295.1	-	0.629405360966231	0.713148740963918	-0.0837433799976877	-12.4182409595512	9.10443733125222	5.1654548454822e-07	0.000207296350561806	-0.0989717806765791	-0.0685149793187962	0.00674357827895733
chr14:53426825	AL365295.1	+	0.514678855627131	0.603264843613052	-0.0885859879859204	-4.53561298549198	7.88737072631951	0.00198043239562115	0.0245768173877373	-0.133737221771588	-0.0434347542002526	0.0195312052128961
chr14:53666420	AL365295.1	-	0.57334387589162	0.656949620427881	-0.0836057445362616	-5.43076601287874	17.6071158464361	3.98185731617019e-05	0.00243288413481319	-0.116000901161356	-0.0512105879111667	0.0153948346030736
chr14:53727038	LINC02331	-	0.601503270363034	0.693186522111217	-0.0916832517481828	-6.80050341221002	13.7086145588606	9.58383171396569e-06	0.00106214655119902	-0.120656675806942	-0.0627098276894235	0.0134818330630596
chr14:53727038	AL365295.1	-	0.601503270363034	0.693186522111217	-0.0916832517481828	-6.80050341221002	13.7086145588606	9.58383171396569e-06	0.00106214655119902	-0.120656675806942	-0.0627098276894235	0.0134818330630596
chr14:55901910	AL163952.1	+	0.563870419449244	0.647817069971801	-0.0839466505225572	-4.16246515103541	9.67159262967357	0.0020861731426314	0.025353095525562	-0.129090399910434	-0.0388029011346805	0.0201675323339765
chr14:56564245	TMEM260	+	0.673402739189846	0.760154569892473	-0.0867518307026275	-5.01352995864002	6.44246451457136	0.00196777446553527	0.0244795764427908	-0.128397081848644	-0.0451065795566107	0.0173035428965822
chr14:56839128	OTX2-AS1	+	0.440966964836622	0.600866596638655	-0.159899631802033	-4.5458399051544	7.64132227345807	0.00211902370075434	0.0256075058629034	-0.24168071593053	-0.0781185476735361	0.0351749368957599
chr14:56839128	AL161757.4	+	0.440966964836622	0.600866596638655	-0.159899631802033	-4.5458399051544	7.64132227345807	0.00211902370075434	0.0256075058629034	-0.24168071593053	-0.0781185476735361	0.0351749368957599
chr14:57611520	SLC35F4	+	0.602369216917536	0.697641247641248	-0.0952720307237115	-4.46787522087174	11.2258484834373	0.00090409724102058	0.0153600868510493	-0.142090429323309	-0.0484536321241142	0.0213237895003529
chr14:57787271	SLC35F4	+	0.538736167942502	0.633802827660595	-0.0950666597180929	-5.72789968685436	17.4019015614354	2.25118482211908e-05	0.00173631138049035	-0.130022025560381	-0.060111293875805	0.0165971237129506
chr14:57944986	SLC35F4	+	0.641570079043335	0.748363170854776	-0.106793091811442	-7.27948959288481	12.3456827242315	8.30093072099477e-06	0.000975262612272585	-0.138658185208171	-0.0749279984147126	0.014670409298452
chr14:57950353	SLC35F4	-	0.468514675550536	0.65175931834761	-0.183244642797074	-6.22153203231998	13.2426514895647	2.86318212536943e-05	0.00200102849201011	-0.246756309984813	-0.119732975609335	0.0294532989374874
chr14:58858140	LINC01500	-	0.580494638660273	0.710063661828368	-0.129569023168094	-6.93145957662946	10.6505334983246	2.93044226247289e-05	0.00203036771237722	-0.170877107575403	-0.0882609387607862	0.0186928916970038
chr14:59666503	RTN1	+	0.567370028891773	0.661956873917658	-0.0945868450258857	-7.11352295053042	14.1951586430473	4.83502875136028e-06	0.000716155649237219	-0.123068830273823	-0.0661048597779483	0.0132967652854529
chr14:59834101	RTN1	+	0.608648025764441	0.688680555555556	-0.0800325297911142	-6.11355623361612	16.1606123188014	1.43183305779276e-05	0.00133520750592784	-0.10776179901083	-0.0523032605713988	0.0130909942974018
chr14:59949424	LRRC9	-	0.497237487360245	0.593086883876358	-0.0958493965161129	-5.89052774437547	12.8467736502328	5.58101935065203e-05	0.00296375429390394	-0.131045117688725	-0.0606536753435007	0.0162717842399833
chr14:60553317	AL049874.3	+	0.656854912373488	0.573438285570638	0.0834166268028498	5.00835830586955	7.27623987525715	0.00138271207528252	0.0197772334544529	0.0443337537960485	0.122499499809651	0.0166554830362456
chr14:61201769	PRKCH	+	0.621566964106217	0.718216417001583	-0.0966494528953666	-7.47003357725684	15.5925408288946	1.56320937809326e-06	0.000379970805894191	-0.124135766916382	-0.0691631388743509	0.0129382889508856
chr14:61453264	PRKCH	-	0.479183292750298	0.573067673067673	-0.0938843803173746	-7.05118068078803	16.261188153168	2.50099038412836e-06	0.000497877373744904	-0.122073489386439	-0.0656952712483105	0.0133147035323001
chr14:61453290	PRKCH	-	0.599661633428075	0.696199633699634	-0.0965380002715589	-5.67835190366625	15.1832296135033	4.18190312157674e-05	0.00250415581228259	-0.132736850805313	-0.0603391497378048	0.0170010597985709
chr14:61892130	SYT16	-	0.596148610243398	0.743361490024786	-0.147212879781389	-7.06009381092096	17.0506283336873	1.88353780611882e-06	0.000421763727953767	-0.191195551613787	-0.10323020794899	0.0208514056220714
chr14:63086680	KCNH5	+	0.658719301117576	0.813194700036805	-0.154475398919229	-10.051602392741	13.013093303783	1.67996521003343e-07	0.000116448227223014	-0.187673059058883	-0.121277738779575	0.0153682361163417
chr14:66310997	AL359232.1	+	0.542536540546614	0.672399735614839	-0.129863195068225	-5.92589011994176	9.24676809145692	0.000199342769352007	0.00624712957309477	-0.179236404963296	-0.0804899851731532	0.0219145465811474
chr14:66333150	AL359232.1	+	0.549010397427869	0.629961778394247	-0.0809513809663788	-5.51517151173185	14.1903699234191	7.25088236140011e-05	0.00345364618412378	-0.112392865215871	-0.0495098967168868	0.0146779444291405
chr14:66734459	GPHN	-	0.614639912398434	0.712278244631186	-0.0976383322327514	-4.52422331738278	14.2743142299529	0.000454647576708492	0.0102192406146988	-0.143842168308817	-0.051434496156686	0.0215812362439338
chr14:66752708	GPHN	+	0.62933055598635	0.712944297135754	-0.0836137411494041	-3.44935987436195	9.88399595138477	0.00633992692296794	0.0499009975827206	-0.1377106872682	-0.0295167950306079	0.0242403646458811
chr14:66796103	GPHN	-	0.590318154927288	0.675591030560605	-0.0852728756333165	-6.38866278915359	15.7696124379153	9.61525538239108e-06	0.00106429187949075	-0.113602011843067	-0.0569437394235665	0.0133475311575514
chr14:67088995	GPHN	-	0.652372723656724	0.742867646570006	-0.0904949229132814	-9.3149825270256	11.6180830599379	9.85131802125469e-07	0.00029281528188408	-0.111739489557279	-0.069250356269284	0.00971498579312716
chr14:67177178	GPHN	-	0.607170747077896	0.702101789800588	-0.094931042722692	-5.70132712401346	17.9997491496689	2.08962112875051e-05	0.00166554818161738	-0.129912883766746	-0.0599492016786383	0.0166506921384762
chr14:67216360	FAM71D	-	0.571141450615933	0.698198561702147	-0.127057111086214	-6.59370172914842	8.9215695739711	0.00010409785395034	0.00427960202588255	-0.170706156213101	-0.0834080659593271	0.0192694659700089
chr14:67217255	FAM71D	-	0.62989538134225	0.722457478289121	-0.0925620969468709	-6.46550311010172	10.3999596082221	6.0179257526289e-05	0.00309305778895498	-0.124295300858306	-0.0608288930354354	0.0143163022846979
chr14:67847519	RAD51B	-	0.652262005280581	0.769892680418996	-0.117630675138415	-6.82395638369425	17.9986911252249	2.18146244751683e-06	0.000457214749571483	-0.153846347149686	-0.0814150031271441	0.017237899617807
chr14:68293167	RAD51B	-	0.605892454436498	0.511904761904762	0.0939876925317359	5.02564691110363	7.94086633436613	0.00104273944495872	0.01671422125854	0.0508057364758321	0.13716964858764	0.018701610796429
chr14:69126021	DCAF5	+	0.375715957485242	0.287766575529733	0.0879493819555086	3.78269582475661	17.2477201569103	0.00145330320805582	0.0203864853324488	0.0389488336523635	0.136949930258654	0.0232504504802914
chr14:70102483	SLC8A3	+	0.625624969799973	0.773680246570263	-0.148055276770291	-6.2326016708313	17.8988640152569	7.20528154466675e-06	0.000903734456680644	-0.197982841626687	-0.0981277119138938	0.0237549717741778
chr14:70309914	AL356804.1	-	0.650360487235733	0.741263525746284	-0.0909030385105513	-9.23519953914782	17.1775408652393	4.4864185935489e-08	5.98444987572567e-05	-0.111653836160569	-0.0701522408605331	0.00984310497301278
chr14:71886055	AC005993.1	-	0.578865580639036	0.668643077601411	-0.0897774969623749	-6.31849883713997	17.086472975282	7.5278974903407e-06	0.000927046040930768	-0.119743628140234	-0.0598113657845155	0.014208675078749
chr14:72069175	RGS6	-	0.53660075489268	0.621355063924723	-0.0847543090320431	-5.41935596773655	9.33254915645643	0.000372560847339702	0.00907711947813056	-0.119941365079281	-0.0495672529848048	0.0156391847180029
chr14:72374775	RGS6	+	0.564995002724437	0.691129785247432	-0.126134782522996	-5.48369204783136	12.3189596014204	0.000127335997806201	0.00480468493292948	-0.176107858249108	-0.0761617067968838	0.0230017990475739
chr14:75843714	AF107885.2	-	0.430015930446472	0.523509823509823	-0.0934938930633518	-5.13965253975704	17.3648408204415	7.67053988176439e-05	0.00357479783995034	-0.131811588405438	-0.0551761977212659	0.0181907030368577
chr14:75843714	TTLL5	-	0.430015930446472	0.523509823509823	-0.0934938930633518	-5.13965253975704	17.3648408204415	7.67053988176439e-05	0.00357479783995034	-0.131811588405438	-0.0551761977212659	0.0181907030368577
chr14:77170087	AC007375.2	-	0.621113226885971	0.710032643934443	-0.0889194170484722	-7.7033579839644	13.7242186728098	2.40338136877777e-06	0.000485100117894022	-0.113723319597469	-0.0641155144994749	0.0115429423419722
chr14:77170087	TMEM63C	-	0.621113226885971	0.710032643934443	-0.0889194170484722	-7.7033579839644	13.7242186728098	2.40338136877777e-06	0.000485100117894022	-0.113723319597469	-0.0641155144994749	0.0115429423419722
chr14:77542061	SPTLC2	+	0.385243439971437	0.28636063011063	0.0988828098608072	5.18645254772003	10.371945953322	0.000363708202256953	0.00895107216380672	0.0566076054760782	0.141158014245536	0.0190655961759982
chr14:78546304	NRXN3	-	0.497058270676692	0.577880251793295	-0.0808219811166035	-3.28428330242195	16.0595113592326	0.00465251453487478	0.0413864115199037	-0.132974412489377	-0.0286695497438298	0.0246087117566875
chr14:79129389	NRXN3	-	0.617103030023198	0.701444489487968	-0.0843414594647696	-5.58126289931866	10.4839848181769	0.000196631840010583	0.00619559314248126	-0.11780255266588	-0.0508803662636596	0.015111536759013
chr14:79227459	NRXN3	-	0.476046236556076	0.58557343711806	-0.109527200561983	-4.66152881847185	10.7099990422736	0.000743003273421653	0.0136614593987825	-0.161412869260247	-0.0576415318637191	0.0234959827187958
chr14:79618898	NRXN3	-	0.618534810811699	0.710813260813261	-0.0922784500015621	-3.24808353317331	13.8145694300249	0.00592353071358598	0.0478775138893422	-0.153288923845933	-0.0312679761571914	0.0284101221717682
chr14:79618898	AC008056.2	-	0.618534810811699	0.710813260813261	-0.0922784500015621	-3.24808353317331	13.8145694300249	0.00592353071358598	0.0478775138893422	-0.153288923845933	-0.0312679761571914	0.0284101221717682
chr14:79768975	NRXN3	+	0.658486782035169	0.809964989944573	-0.151478207909403	-9.74133462219293	15.5822641759523	5.01507154247691e-08	6.31930358549231e-05	-0.18451480336689	-0.118441612451917	0.0155500466603726
chr14:79768975	AC008056.1	+	0.658486782035169	0.809964989944573	-0.151478207909403	-9.74133462219293	15.5822641759523	5.01507154247691e-08	6.31930358549231e-05	-0.18451480336689	-0.118441612451917	0.0155500466603726
chr14:79811673	NRXN3	-	0.59277955262586	0.690903774587985	-0.0981242219621256	-5.98334889293	8.76282964655805	0.000229936287627891	0.00679813517913047	-0.1353762025991	-0.0608722413251512	0.0163995487674253
chr14:80284038	DIO2	-	0.549768332580935	0.647644110275689	-0.0978757776947545	-5.43361404277933	9.05203922487167	0.000406240134459963	0.0095473879007149	-0.138588370051047	-0.0571631853384622	0.0180130161848394
chr14:80284038	DIO2-AS1	-	0.549768332580935	0.647644110275689	-0.0978757776947545	-5.43361404277933	9.05203922487167	0.000406240134459963	0.0095473879007149	-0.138588370051047	-0.0571631853384622	0.0180130161848394
chr14:80903653	CEP128	+	0.518031049460723	0.295764573019475	0.222266476441248	3.73591052826559	8.6509640567926	0.00499190548612462	0.0432087439918249	0.0868480543161252	0.357684898566371	0.0594945930207907
chr14:81069786	AC007262.2	+	0.526680196510914	0.642261686140789	-0.115581489629875	-6.39491004224708	10.4633780188095	6.42509603880639e-05	0.0032101313959309	-0.155612392037043	-0.0755505872227066	0.018073982099248
chr14:81069786	TSHR	+	0.526680196510914	0.642261686140789	-0.115581489629875	-6.39491004224708	10.4633780188095	6.42509603880639e-05	0.0032101313959309	-0.155612392037043	-0.0755505872227066	0.018073982099248
chr14:81348105	STON2	+	0.572337428407751	0.659870772502351	-0.0875333440946001	-6.11808024228846	11.0065116291424	7.52203097663977e-05	0.00353426021831317	-0.119021274674633	-0.0560454135145676	0.0143073220075745
chr14:85643538	FLRT2	-	0.602383833506829	0.779039719829194	-0.176655886322365	-6.42820428952816	13.3077655162884	2.00738390323994e-05	0.00162421779676954	-0.23588651388691	-0.11742525875782	0.0274813740145355
chr14:85971907	LINC02328	-	0.663986932106064	0.749956280278861	-0.0859693481727974	-5.69007953242353	15.5609965204595	3.72433233212803e-05	0.00234080274800139	-0.118071823091233	-0.053866873254362	0.0151086373543502
chr14:86117620	LINC02328	-	0.636489333326655	0.72748076376593	-0.0909914304392747	-5.93955284416143	11.0519469374604	9.55301985775054e-05	0.004072337487062	-0.124690263661724	-0.0572925972168257	0.0153195758715606
chr14:86399650	LINC02309	+	0.650213539961439	0.750131078072255	-0.0999175381108154	-7.97930979144132	13.5779783859133	1.72868225956583e-06	0.000402580431098592	-0.12685324937958	-0.0729818268420505	0.012522077814047
chr14:87479965	LINC02296	-	0.571343026990658	0.653654415507864	-0.0823113885172059	-4.80301121245879	12.5749716855939	0.000378435870563349	0.00915975194483742	-0.119462217700718	-0.0451605593336933	0.017137454999833
chr14:87551800	LINC02296	+	0.570951158241074	0.652683843263553	-0.0817326850224792	-3.44317872156792	10.5061506087429	0.00586489707747366	0.0475927670231281	-0.134279916234579	-0.0291854538103795	0.0237375668333768
chr14:88097824	LINC01146	-	0.509488197192753	0.596985553480652	-0.0874973562878988	-4.98729682801401	12.4113582007607	0.000285517709320223	0.00773272278893636	-0.125582503040778	-0.0494122095350195	0.0175440442598924
chr14:88763071	EML5	+	0.641080489195886	0.731874608863856	-0.0907941196679698	-8.53092031626819	14.2052535854202	5.78194448092446e-07	0.000220062390321336	-0.113590062897696	-0.0679981764382441	0.0106429454621477
chr14:88777147	EML5	+	0.612045705329867	0.714413842091861	-0.102368136761994	-4.15363115201701	8.49952457824246	0.00279803918603177	0.0303429688852625	-0.158624488326269	-0.046111785197719	0.0246454567137681
chr14:89136596	FOXN3	+	0.604254126771481	0.684333028083028	-0.0800789013115466	-5.41679637047855	17.9225359509755	3.8576274308221e-05	0.00238711159581386	-0.111147388047098	-0.049010414575995	0.0147834431709442
chr14:89841220	AL137230.3	-	0.643590828982802	0.74749632321782	-0.103905494235018	-5.98070872549666	15.4126008038065	2.24772753974423e-05	0.00173455295549805	-0.14084995400007	-0.0669610344699669	0.0173734416779158
chr14:89841220	EFCAB11	-	0.643590828982802	0.74749632321782	-0.103905494235018	-5.98070872549666	15.4126008038065	2.24772753974423e-05	0.00173455295549805	-0.14084995400007	-0.0669610344699669	0.0173734416779158
chr14:90780679	TTC7B	+	0.6609009430051	0.762276681007331	-0.101375738002231	-4.33392931776843	14.6893591295046	0.00061783041799256	0.0122564736294681	-0.151324854087399	-0.0514266219170627	0.0233911839739993
chr14:93512218	UNC79	-	0.535909517435046	0.61848626267864	-0.0825767452435938	-5.02225020950831	7.18984509803371	0.00140991165120628	0.0200133372492797	-0.121249178811273	-0.0439043116759146	0.0164421806558456
chr14:95188510	CLMN	+	0.613021701925685	0.695070584889866	-0.0820488829641816	-5.98921355511891	12.680037460942	5.02208899512898e-05	0.00279344298287706	-0.111720822700156	-0.0523769432282071	0.0136994418731413
chr14:95719738	AL139020.1	-	0.530614639211794	0.615911687962505	-0.0852970487507106	-4.4695914156807	10.8865389488377	0.000971948007722537	0.0160205205812685	-0.127353809167716	-0.043240288333705	0.0190838581914809
chr14:99972847	EVL	-	0.40271822410401	0.280857214680744	0.121861009423265	5.39014486846467	8.51733756556727	0.000529045956022532	0.0111520042771608	0.0702726871867283	0.173449331659803	0.0226081139555673
chr15:100262997	ADAMTS17	+	0.565643362379549	0.648828136633015	-0.0831847742534654	-5.69828538888856	15.0088785296375	4.21196967299e-05	0.00251529877900871	-0.114298522070828	-0.052071026436103	0.0145982113173328
chr15:100903792	AC015712.2	-	0.616384445754746	0.699770522510797	-0.0833860767560506	-4.45678930653645	10.084051393945	0.0011973235439793	0.0181425292498565	-0.125027277374528	-0.041744876137573	0.0187098987681007
chr15:100903792	ALDH1A3	-	0.616384445754746	0.699770522510797	-0.0833860767560506	-4.45678930653645	10.084051393945	0.0011973235439793	0.0181425292498565	-0.125027277374528	-0.041744876137573	0.0187098987681007
chr15:101056551	LRRK1	+	0.656704196797118	0.739744365169248	-0.0830401683721292	-6.64672036748963	10.0244444778437	5.66657484726693e-05	0.002987993978741	-0.110868010753209	-0.0552123259910495	0.0124934048344044
chr15:101056551	AC090907.2	+	0.656704196797118	0.739744365169248	-0.0830401683721292	-6.64672036748963	10.0244444778437	5.66657484726693e-05	0.002987993978741	-0.110868010753209	-0.0552123259910495	0.0124934048344044
chr15:101413620	PCSK6	+	0.62471934578027	0.708630952380952	-0.0839116066006823	-5.58819785747078	9.84771501573839	0.000244788071084347	0.00705214593786494	-0.117439295205629	-0.0503839179957352	0.0150158617752774
chr15:101649200	TM2D3	-	0.618018451356576	0.723310948310948	-0.105292496954372	-7.66339939092339	8.36833327177684	4.65655087875392e-05	0.0026740114577877	-0.136735099293404	-0.0738498946153405	0.0137396593317428
chr15:20137649	AC087386.1	-	0.5317050610161	0.632665712997534	-0.100960651981433	-7.25212546178421	17.6380958338432	1.08661934030574e-06	0.000309229963213583	-0.130251768178731	-0.0716695357841353	0.0139215258359022
chr15:20317717	AC026495.2	+	0.47757981368944	0.582230217461183	-0.104650403771743	-6.45258275044565	16.7115162883151	6.4727337711232e-06	0.000848940747978583	-0.138913234670189	-0.0703875728732958	0.0162183745360747
chr15:20732568	AC012414.4	-	0.615244552391748	0.718533688533689	-0.10328913614194	-7.11436728029713	10.77791012286	2.18151199682645e-05	0.00170665921146811	-0.135324410261007	-0.0712538620228737	0.0145183868181777
chr15:22466646	GOLGA6L22	+	0.621712048170029	0.710030007178647	-0.0883179590086183	-8.93305788058678	17.9962311442052	4.92990154367529e-08	6.30201281842629e-05	-0.109089338139177	-0.0675465798780598	0.00988664354235853
chr15:22667997	WHAMMP3	+	0.655349381911191	0.762131006248653	-0.106781624337462	-5.93294612117699	9.75627500901168	0.000159538828874256	0.00547895953242252	-0.147020049403066	-0.0665431992718583	0.0179980775413276
chr15:23934762	PWRN4	-	0.526512483861803	0.678008103008103	-0.1514956191463	-3.71511765936476	16.5140346014876	0.00179514224566552	0.0231880207681077	-0.23772325727491	-0.0652679810176902	0.0407781483755763
chr15:24110132	PWRN1	-	0.384522508202632	0.289934602434602	0.09458790576803	3.56034037413939	9.6958833903643	0.00543503927588585	0.0454392397757056	0.0351400869672071	0.154035724568853	0.0265670963526609
chr15:24319804	PWRN1	+	0.563022670313311	0.668298771121352	-0.105276100808041	-5.8212210003636	7.45485499619866	0.000514869792199574	0.0109799155244244	-0.147516758554359	-0.0630354430617227	0.0180848830170621
chr15:24368992	PWRN1	-	0.519547580742407	0.610141794050504	-0.0905942133080967	-3.79844344539004	7.71541907410782	0.00561258506433385	0.0463133108247914	-0.145948341653701	-0.0352400849624921	0.0238503520219699
chr15:24583997	PWRN1	-	0.686001505024158	0.803218889663902	-0.117217384639745	-3.81078274420799	15.5387613616295	0.00161083132192714	0.0217243377684308	-0.182582057654371	-0.0518527116251183	0.030759398398637
chr15:24583997	AC090983.2	-	0.686001505024158	0.803218889663902	-0.117217384639745	-3.81078274420799	15.5387613616295	0.00161083132192714	0.0217243377684308	-0.182582057654371	-0.0518527116251183	0.030759398398637
chr15:24778005	AC090983.2	-	0.555453930903386	0.652468069918197	-0.0970141390148113	-8.14437899162807	15.5835087735819	5.28867685605689e-07	0.000209996310980338	-0.122320969005337	-0.0717073090242857	0.0119117908332282
chr15:24778005	PWRN1	-	0.555453930903386	0.652468069918197	-0.0970141390148113	-8.14437899162807	15.5835087735819	5.28867685605689e-07	0.000209996310980338	-0.122320969005337	-0.0717073090242857	0.0119117908332282
chr15:24828541	SNRPN	+	0.649563218348385	0.774184489973964	-0.124621271625579	-5.79444568233932	13.6659357833733	5.11460254362727e-05	0.00282147230280817	-0.170855258438131	-0.0783872848130271	0.0215070221480215
chr15:24828541	AC090983.2	+	0.649563218348385	0.774184489973964	-0.124621271625579	-5.79444568233932	13.6659357833733	5.11460254362727e-05	0.00282147230280817	-0.170855258438131	-0.0783872848130271	0.0215070221480215
chr15:24870711	AC090983.2	-	0.585832797911428	0.666624131133935	-0.0807913332225072	-4.08208380751793	8.84501355452053	0.00285152092174	0.0307092726963769	-0.125683117959135	-0.0358995484858796	0.0197916890078824
chr15:24870711	SNRPN	-	0.585832797911428	0.666624131133935	-0.0807913332225072	-4.08208380751793	8.84501355452053	0.00285152092174	0.0307092726963769	-0.125683117959135	-0.0358995484858796	0.0197916890078824
chr15:24913885	SNRPN	+	0.611729722253274	0.702782905687065	-0.0910531834337912	-4.49783086229699	17.7477912313838	0.00028740888753278	0.00776230605711307	-0.133627190538816	-0.0484791763287661	0.0202437988936052
chr15:25284395	SNHG14	+	0.615019551189388	0.726039030749176	-0.111019479559788	-6.07726299640328	17.3593455558333	1.12546195460596e-05	0.00116463608496609	-0.149500917375109	-0.0725380417444667	0.0182680064406449
chr15:26468071	AC009878.2	+	0.672579326479702	0.785060892172961	-0.112481565693259	-6.53028461895657	16.4005647896389	6.13532180509176e-06	0.000824050143532647	-0.148923747587493	-0.0760393837990244	0.0172246038659233
chr15:26694971	GABRB3	+	0.612779460792543	0.713433468758423	-0.10065400796588	-7.90384881222538	12.1488949562722	3.93496295362928e-06	0.000639485855316489	-0.128363105098658	-0.0729449108331018	0.0127348093766915
chr15:26695080	GABRB3	+	0.539424434674448	0.631762322126003	-0.0923378874515551	-4.28559645495467	17.9912772101042	0.000445525281658803	0.0100956400810311	-0.137606135872001	-0.0470696390311096	0.0215460994571249
chr15:27002964	GABRG3	+	0.538095258313704	0.627611601295812	-0.0895163429821079	-5.23850893735279	10.5520476808815	0.00031815958463226	0.00825080994127103	-0.12732279282723	-0.0517098931369853	0.0170881340573495
chr15:27186779	GABRG3	-	0.626159338106485	0.71853690971338	-0.092377571606895	-6.1163115670164	14.3779563343713	2.37467654425596e-05	0.00179199612171076	-0.124691601639342	-0.0600635415744482	0.0151034770865929
chr15:27335953	GABRG3	+	0.626455809596566	0.734419987808294	-0.107964178211728	-6.03419384689359	12.9744751962081	4.24070108373915e-05	0.00252543430603787	-0.146625362396763	-0.0693029940266928	0.0178920632898308
chr15:27789213	OCA2	-	0.511676150646739	0.668168228829993	-0.156492078183255	-8.04777901170228	13.6183926869508	1.53795496325667e-06	0.000376934590998683	-0.198308166159718	-0.114675990206791	0.0194453746748885
chr15:27924577	OCA2	+	0.580799570104081	0.665841468473047	-0.085041898368966	-5.51351553335496	8.84543118309208	0.000397165140339113	0.00942219014938105	-0.120027163563662	-0.0500566331742705	0.0154242602300638
chr15:28806561	PDCD6IPP2	-	0.643868499195403	0.741132887971968	-0.097264388776565	-8.29347567988603	16.6202263673793	2.62737849991658e-07	0.000148535951423246	-0.122051065406714	-0.072477712146416	0.0117278198587424
chr15:29350465	FAM189A1	-	0.582495970393687	0.695739970273077	-0.11324399987939	-6.63403578009512	8.53026299135426	0.000122194619458291	0.00468914766325801	-0.152185955225548	-0.0743020445332321	0.0170701521115049
chr15:29419425	FAM189A1	+	0.516207102044782	0.379921952106384	0.136285149938398	4.15536027389421	10.4981059404483	0.00176915941072874	0.0229917823917802	0.0636751890024552	0.20889511087434	0.032797432943324
chr15:29500992	FAM189A1	+	0.555755913885613	0.656655844155844	-0.100899930270231	-8.0659640947532	15.2611045132036	6.91165512793014e-07	0.000241799988408378	-0.127523291527514	-0.0742765690129476	0.0125093453287084
chr15:29735927	TJP1	+	0.530486256052618	0.647141723450444	-0.116655467397827	-7.19084524806728	17.6556486292574	1.21041394377626e-06	0.000327536598151966	-0.150785964693024	-0.0825249701026293	0.0162227754003162
chr15:29781041	TJP1	+	0.571471136853711	0.672415139326904	-0.100944002473193	-5.24843422276386	10.7249311236542	0.000297090953479105	0.00790951450160283	-0.143408754955848	-0.0584792499905376	0.0192331652048476
chr15:30034697	AC111152.2	+	0.666468606546703	0.7758865416193	-0.109417935072597	-4.0324276534267	7.21459077179376	0.00467749801787051	0.0415280302198072	-0.173195987680429	-0.0456398824647654	0.0271345066735705
chr15:30123732	ULK4P3	-	0.658193942585212	0.746644265307728	-0.0884503227225155	-4.92799278532601	17.9884113314227	0.000108720871866554	0.00438309160827034	-0.126160567457449	-0.050740077987582	0.0179485495567064
chr15:31095859	TRPM1	+	0.605094581764089	0.687033645366979	-0.0819390636028895	-5.82610655280627	17.7716326763163	1.69616860790918e-05	0.00147380363950498	-0.111513923483391	-0.0523642037223881	0.0140641203280812
chr15:31121635	TRPM1	+	0.619216072556625	0.72853435121237	-0.109318278655745	-6.29385327775219	11.0987128061618	5.65750372974236e-05	0.00298477207053215	-0.147505866521286	-0.0711306907902038	0.0173690541916775
chr15:31410758	KLF13	+	0.499468758467206	0.703456970184659	-0.203988211717453	-8.76504380619226	14.6977673197349	3.21365572468283e-07	0.000165886463590824	-0.253682268411228	-0.154294155023678	0.0232729255241532
chr15:31427408	KLF13	+	0.576140064429957	0.713523398006157	-0.1373833335762	-5.01003274160248	8.58051186509571	0.000842067827799883	0.014719759498342	-0.199880778225028	-0.074885888927372	0.0274216438618039
chr15:31952142	CHRNA7	-	0.651753658876084	0.764347826086957	-0.112594167210872	-5.85432243670001	8.67059876529671	0.000280008604032066	0.00763668191961376	-0.156354720991184	-0.0688336134305601	0.0192326556024713
chr15:32130564	CHRNA7	-	0.563172719835586	0.64606066661333	-0.0828879467777439	-6.8783156573043	17.0783082043765	2.61021906180088e-06	0.000509327383605999	-0.108303648434697	-0.0574722451207904	0.0120506168817249
chr15:32880384	FMN1	-	0.465154316173777	0.579669161248109	-0.114514845074332	-5.72966501816871	14.4230989651038	4.63874387332914e-05	0.00266704150008686	-0.157263538437543	-0.0717661517111214	0.0199863071769827
chr15:34144502	KATNBL1	-	0.62799341948778	0.726789779006318	-0.0987963595185374	-3.94718975136037	17.9898670746472	0.000945556967084614	0.0157701219709459	-0.151383603296589	-0.0462091157404853	0.0250295439899964
chr15:37470323	AC068875.1	+	0.643039919930676	0.72388969109591	-0.0808497711652337	-5.9519681761356	13.3923502527159	4.25089599345243e-05	0.00252830495139903	-0.110108423207295	-0.0515911191231722	0.0135837035368234
chr15:38476786	FAM98B	-	0.649191259833079	0.774422494949872	-0.125231235116793	-6.91488203557357	12.3807425755151	1.37270580614025e-05	0.00130341582860314	-0.164556226025154	-0.0859062442084326	0.0181103935645672
chr15:38737624	LINC02694	+	0.564574312200579	0.693909200702679	-0.1293348885021	-7.77055708149031	12.7913938383061	3.39919504263736e-06	0.000586022720232449	-0.165352248500093	-0.0933175285041068	0.0166442234637436
chr15:38778487	LINC02694	-	0.629692646289285	0.711942918192918	-0.0822502719036333	-4.41872535834412	16.2275013994057	0.000416779749183481	0.00969717849379491	-0.121665332717921	-0.0428352110893452	0.0186140267234115
chr15:38802285	LINC02694	-	0.653907777277751	0.738164251207729	-0.0842564739299784	-4.57571128990777	17.9196868715279	0.000236937157990968	0.00691787286821238	-0.122954974894407	-0.0455579729655495	0.0184138527524268
chr15:38978522	AC013652.1	-	0.566737879362271	0.672237950413008	-0.105500071050736	-4.99440807470731	13.1394691689807	0.00023763176752398	0.00693193021871076	-0.151085726677738	-0.0599144154237345	0.021123638571908
chr15:38978522	LINC02694	-	0.566737879362271	0.672237950413008	-0.105500071050736	-4.99440807470731	13.1394691689807	0.00023763176752398	0.00693193021871076	-0.151085726677738	-0.0599144154237345	0.021123638571908
chr15:39374973	AC013652.1	+	0.638370914900875	0.735748701189878	-0.097377786289003	-6.99598737445639	8.47234330026187	8.56011988305994e-05	0.0038087648613929	-0.129166437786963	-0.065589134791043	0.0139190911985557
chr15:39864645	GPR176	+	0.603343572971107	0.689428496221974	-0.0860849232508679	-9.18385618806842	17.9909850388162	3.27000249039461e-08	5.20823508325673e-05	-0.105778634152759	-0.0663912123489771	0.00937350514729408
chr15:40789822	DNAJC17	+	0.518292985210278	0.433575115323218	0.0847178698870606	5.17218451096136	16.1878374314523	8.92823329484893e-05	0.00390363337320201	0.0500275678613069	0.119408171912814	0.0163795142473203
chr15:43247404	TGM5	+	0.596947655825028	0.68596870965292	-0.0890210538278918	-5.71906114530624	10.932000574705	0.000137582002887129	0.00502238368376923	-0.123306894000969	-0.0547352136548146	0.0155656761776281
chr15:43486099	TP53BP1	+	0.668384944273471	0.755263202102283	-0.086878257828812	-6.89750947711258	15.6125579310192	4.09657509677386e-06	0.000654001531314937	-0.113633687870973	-0.0601228277866506	0.012595598181792
chr15:43650967	CATSPER2	+	0.523956335267389	0.626821130751151	-0.102864795483762	-6.16460938757599	11.9718564075013	4.88801881744091e-05	0.0027491720639396	-0.139230698154424	-0.0664988928130993	0.0166863444245264
chr15:43833297	WDR76	-	0.442853193909143	0.539768412577337	-0.0969152186681945	-4.64453098436408	15.3724768641421	0.000298524965003569	0.00793197607595901	-0.141297485364802	-0.0525329519715867	0.020866524304491
chr15:44140753	FRMD5	+	0.567280929670359	0.688876760450184	-0.121595830779825	-6.45112435017264	7.44913996559934	0.000269127473113381	0.0074639690480824	-0.16562708811113	-0.0775645734485205	0.0188487811084545
chr15:45719739	AC068722.1	+	0.540013713635428	0.637734159115738	-0.0977204454803103	-4.59740062231165	11.1789860013794	0.00073674644196819	0.0135875715631642	-0.144412449615193	-0.0510284413454272	0.0212555862558645
chr15:45757499	AC068722.1	-	0.594353738843753	0.675625883964826	-0.0812721451210726	-4.53894788723514	9.60096449303614	0.0011940352358064	0.0181159142019448	-0.121393999078206	-0.041150291163939	0.0179055030240893
chr15:46541255	AC012405.1	-	0.583381761172225	0.666852515841604	-0.0834707546693793	-6.87661397036769	17.99025310534	1.97522463005007e-06	0.00043222914058175	-0.108973474399628	-0.0579680349391304	0.0121383510880597
chr15:47261522	SEMA6D	-	0.600157786440068	0.71265873015873	-0.112500943718662	-6.47834465145107	17.6946226204585	4.66848988939389e-06	0.000701482565502768	-0.149030095900061	-0.075971791537263	0.017365692900186
chr15:47365987	SEMA6D	+	0.514203628421065	0.630826393941844	-0.116622765520778	-7.54167930520244	11.5220339653436	8.6945266246091e-06	0.00100282399234311	-0.15047108645477	-0.082774444586787	0.0154637661986408
chr15:47365987	AC023905.1	+	0.514203628421065	0.630826393941844	-0.116622765520778	-7.54167930520244	11.5220339653436	8.6945266246091e-06	0.00100282399234311	-0.15047108645477	-0.082774444586787	0.0154637661986408
chr15:49397131	FAM227B	+	0.596394641805217	0.687062357458777	-0.0906677156535598	-7.58861508774667	13.1411396276504	3.71395759070747e-06	0.000619699013877038	-0.11645134676417	-0.0648840845429497	0.011947860657732
chr15:49549211	FAM227B	-	0.637458447504129	0.733612360486423	-0.0961539129822948	-5.62212179217661	8.91886156391876	0.000335844048992577	0.00852427306610831	-0.134896808984408	-0.0574110169801813	0.0171027801489638
chr15:49935944	ATP8B4	-	0.572025568416546	0.791091966916439	-0.219066398499893	-6.49105370877318	15.3752817060099	9.03527511893023e-06	0.00102346096771968	-0.290848010674256	-0.147284786325529	0.033748973329832
chr15:50066968	ATP8B4	-	0.378739813672754	0.269621459694989	0.109118353977765	5.20151611374155	11.9717320170959	0.000223051899500945	0.00667967691314134	0.0633988480951505	0.154837859860379	0.0209781824359809
chr15:50651868	TRPM7	+	0.542379836084464	0.67407453424064	-0.131694698156176	-3.52665686120554	9.67650336281685	0.0057609326213748	0.0470648570567604	-0.215277889138029	-0.0481115071743237	0.0373426458368729
chr15:51141443	MIR4713HG	-	0.647823314667129	0.729326548013978	-0.0815032333468492	-5.48121707045719	7.60591207462947	0.0006976994124669	0.0131594441600578	-0.116104202001786	-0.046902264691912	0.014869550375251
chr15:51141552	MIR4713HG	-	0.622135738179885	0.732455044955045	-0.11031930677516	-5.60435255394053	10.5576925471896	0.000185350097728403	0.00598496848078441	-0.153867252621358	-0.0667713609289627	0.0196845765346423
chr15:51603451	DMXL2	+	0.577093091561247	0.659605308561258	-0.082512217000011	-3.58369455383543	10.3193141143896	0.00474007626447781	0.0418676377834846	-0.133599289960074	-0.0314251440399482	0.0230243442236735
chr15:53543741	WDR72	+	0.637562157543839	0.488775228212808	0.148786929331031	4.65446097359738	7.67807604146943	0.00182382167798825	0.0234157386100551	0.0745305387618555	0.223043319900206	0.03196652204735
chr15:53604772	WDR72	+	0.602369902199624	0.725980392156863	-0.123610489957239	-6.83094651676064	10.5020768482087	3.57732145271335e-05	0.00228854323299416	-0.163670375200897	-0.0835506047135816	0.0180956606312089
chr15:54044789	UNC13C	-	0.673230051640846	0.762394976597763	-0.0891649249569167	-5.686111817138	7.91207862157881	0.000480644475254087	0.0105613049278674	-0.125395847101932	-0.0529340028119016	0.015681176843581
chr15:54177828	UNC13C	-	0.569918036224427	0.681123560535325	-0.111205524310898	-5.12069105112063	11.0191854878227	0.000331278820415967	0.0084592143896729	-0.158993942490559	-0.0634171061312366	0.0217168978172509
chr15:54407268	UNC13C	+	0.580837234975602	0.680427313007292	-0.0995900780316904	-4.53840737097212	8.804656949587	0.00149028568947627	0.0207131331196637	-0.149398880751307	-0.0497812753120738	0.0219438384197667
chr15:54473569	UNC13C	-	0.615753536288083	0.714660004671182	-0.0989064683830988	-6.62826638911892	13.4247194821803	1.39991988620278e-05	0.00131799643776122	-0.131039951315164	-0.0667729854510337	0.0149219211444889
chr15:54528404	UNC13C	-	0.543942061811896	0.625119047619048	-0.0811769858071514	-4.10259783647522	17.9998300603818	0.000668358580408519	0.0128352168214284	-0.122747386040349	-0.0396065855739541	0.0197867275913389
chr15:54538252	UNC13C	+	0.621862936751582	0.701931458811443	-0.080068522059861	-7.30288041844422	14.2054598162652	3.57494465904374e-06	0.000604667572857287	-0.103552019120067	-0.0565850249996547	0.0109639645553608
chr15:55288819	RAB27A	+	0.561951821152949	0.644230769230769	-0.0822789480778203	-4.74609381131754	13.2617812458192	0.000361997492965369	0.00892578450445937	-0.119656389323405	-0.0449015068322361	0.0173361402763717
chr15:55502836	DNAAF4	+	0.622839139455039	0.721505924630925	-0.0986667851758859	-4.48222785605525	6.00183009101483	0.00417931123965866	0.0387561048532262	-0.152526403623886	-0.0448071667278856	0.0220128892025407
chr15:56263243	TEX9	-	0.633464133761232	0.720557111733582	-0.0870929779723503	-6.6288179444893	16.0208315061599	5.75971810982868e-06	0.000795040357822581	-0.114942491713697	-0.0592434642310034	0.0131385382283357
chr15:56278008	TEX9	-	0.646848015318872	0.742347212174798	-0.0954991968559268	-7.42435420927583	13.9200350177841	3.34265970346206e-06	0.000580974292903071	-0.123102385415352	-0.0678960082965011	0.0128629634529845
chr15:56301969	TEX9	+	0.548247572483197	0.636553943214121	-0.0883063707309246	-3.88242738796751	7.94206859919754	0.00472452962592633	0.0417886174200296	-0.140823436207168	-0.0357893052546811	0.0227451441859815
chr15:56400249	TEX9	+	0.597025744109446	0.701263528353312	-0.104237784243866	-5.20533131753995	7.79416837302452	0.000887710567495856	0.015180661762231	-0.150629103731647	-0.057846464756084	0.0200251968385998
chr15:56456426	MNS1	-	0.63266317016317	0.727972076656287	-0.095308906493117	-6.6511933766009	6.79075129661805	0.000330908747090178	0.00845190551826032	-0.129405824737768	-0.0612119882484663	0.0143295948706613
chr15:56767644	AC090517.4	+	0.654240695307316	0.736323372406066	-0.0820826770987499	-3.75412550675855	8.1743683700672	0.00537757724263974	0.0451394974972651	-0.132316077335806	-0.0318492768616938	0.021864659812512
chr15:56786713	AC090517.4	-	0.641299012959783	0.72957729468599	-0.0882782817262078	-6.22916595127537	9.41121739224835	0.000126810535052511	0.00479256343536921	-0.120124778775845	-0.0564317846765703	0.0141717659180574
chr15:58091429	ALDH1A2	+	0.587820988535274	0.719486531986532	-0.131665543451258	-4.66760561993321	13.9570354771518	0.000365679482340199	0.00898173418918606	-0.192183955851473	-0.071147131051043	0.0282083693808608
chr15:58256659	ALDH1A2	+	0.594923716711059	0.714115000220841	-0.119191283509782	-7.74437127745818	11.6285090338221	6.34585865329728e-06	0.000839109209574469	-0.152843935829586	-0.0855386311899777	0.0153906985137343
chr15:58415225	ALDH1A2	+	0.656805816732287	0.739247557997558	-0.0824417412652707	-4.6770128187993	11.7152464968266	0.000570319061740765	0.011677098991186	-0.120951482067075	-0.043932000463466	0.0176270077631379
chr15:58415225	LIPC	+	0.656805816732287	0.739247557997558	-0.0824417412652707	-4.6770128187993	11.7152464968266	0.000570319061740765	0.011677098991186	-0.120951482067075	-0.043932000463466	0.0176270077631379
chr15:58662038	ADAM10	-	0.648608753401987	0.777922727045534	-0.129313973643547	-6.27973202082379	11.227846553433	5.48112134100062e-05	0.0029320529584239	-0.174525304692065	-0.08410264259503	0.0205922757873645
chr15:60951709	RORA	+	0.639980132035638	0.725499391675862	-0.0855192596402239	-6.4860676662248	17.7753573454301	4.49730034223563e-06	0.000686879664899736	-0.113245179744313	-0.0577933395361346	0.0131850705297992
chr15:61007968	RORA	+	0.608514482877837	0.705675366911514	-0.0971608840336766	-5.0168946522236	7.90589712825309	0.00106818025893874	0.016948766949543	-0.141913359800169	-0.052408408267184	0.0193667379462737
chr15:61446460	AC104574.2	+	0.54868909999881	0.646164951892506	-0.0974758518936957	-4.140166507271	6.53374253938256	0.00505147125534579	0.0435060589919069	-0.153964024508276	-0.0409876792791155	0.0235439448443698
chr15:63416893	LINC02568	+	0.669228422138494	0.761452422242076	-0.0922240001035827	-8.12025469275714	16.2289828612411	4.1330551871157e-07	0.000185670314381695	-0.116272777274713	-0.0681752229324527	0.011357279247145
chr15:65583055	INTS14	+	0.615385769388327	0.709646665683817	-0.0942608962954905	-9.21761107417792	16.600600704602	6.17237350449432e-08	7.08202077698187e-05	-0.115875847883927	-0.0726459447070538	0.0102261741721292
chr15:65811760	RAB11A	-	0.616208885099863	0.736196191120126	-0.119987306020264	-10.9984851600299	10.2782099913379	5.19376011924641e-07	0.000207719008751713	-0.144206160429769	-0.095768451610758	0.0109094392795397
chr15:66993459	AC087482.1	+	0.541080916628844	0.633209994903543	-0.0921290782746992	-7.4068425477235	17.0456203441245	1.00826092928061e-06	0.00029681443505754	-0.118366404427442	-0.0658917521219562	0.0124383740684504
chr15:67346927	IQCH-AS1	+	0.650583898140289	0.74457671957672	-0.0939928214364304	-6.75769394709136	15.8963048470991	4.75914952271515e-06	0.000708996680049441	-0.123494241820692	-0.0644914010521684	0.0139090083351417
chr15:67346927	IQCH	+	0.650583898140289	0.74457671957672	-0.0939928214364304	-6.75769394709136	15.8963048470991	4.75914952271515e-06	0.000708996680049441	-0.123494241820692	-0.0644914010521684	0.0139090083351417
chr15:67351926	IQCH	-	0.50743693312385	0.665599807318209	-0.158162874194359	-4.54862404006329	13.0244938787292	0.000543957419569919	0.0113388008762392	-0.233267961801844	-0.0830577865868742	0.034771586484461
chr15:67351926	IQCH-AS1	-	0.50743693312385	0.665599807318209	-0.158162874194359	-4.54862404006329	13.0244938787292	0.000543957419569919	0.0113388008762392	-0.233267961801844	-0.0830577865868742	0.034771586484461
chr15:67352974	IQCH-AS1	+	0.575721121475213	0.434638278388278	0.141082843086934	3.46273821011305	16.5245702855826	0.00308017125251965	0.0321791546388479	0.0549335383455288	0.22723214782834	0.0407431444499317
chr15:67352974	IQCH	+	0.575721121475213	0.434638278388278	0.141082843086934	3.46273821011305	16.5245702855826	0.00308017125251965	0.0321791546388479	0.0549335383455288	0.22723214782834	0.0407431444499317
chr15:68393102	ITGA11	+	0.520567391104804	0.769475902869732	-0.248908511764928	-4.61935361940408	7.87899102315203	0.00178155606872499	0.0230879300822092	-0.373497834661303	-0.124319188868553	0.0538838400938525
chr15:69355641	PAQR5	-	0.503052932312202	0.610307285970844	-0.107254353658642	-6.37322480797578	15.1862875313312	1.18098967046151e-05	0.00119288240211295	-0.143086016203726	-0.0714226911135574	0.0168288985388398
chr15:72419906	TMEM202-AS1	+	0.648786673744543	0.742146312979646	-0.0933596392351037	-6.5791885014019	8.78741855404383	0.000113418930363642	0.00449695830348646	-0.125578743380235	-0.0611405350899727	0.0141901450635151
chr15:72441535	TMEM202-AS1	-	0.528681868813448	0.624824635241302	-0.0961427664278542	-4.2147268945201	9.94614785225878	0.00180791770981189	0.0232962994942434	-0.147006502202819	-0.0452790306528892	0.0228111497693616
chr15:75884897	UBE2Q2	-	0.353438392594186	0.551190476190476	-0.19775208359629	-4.00158594688708	7.76622907188945	0.00418699778986339	0.0387988310476862	-0.312311037179112	-0.0831931300134677	0.0494184271488971
chr15:75992432	NRG4	-	0.625095002115679	0.711688311688312	-0.0865933095726329	-6.54918919068115	13.7712252643846	1.40131703529899e-05	0.00131867940072573	-0.114995917256176	-0.0581907018890895	0.0132219893259225
chr15:76090686	TMEM266	+	0.637220808564525	0.722406145367933	-0.0851853368034082	-5.46159242931373	7.12957426007349	0.000887880864498686	0.0151816119320321	-0.12193131628132	-0.0484393573254963	0.0155971610672004
chr15:78185808	ACSBG1	+	0.615132112273611	0.718570227858794	-0.103438115585183	-6.83400720390142	14.9692603331497	5.71901764962827e-06	0.000791758583038515	-0.135705064864471	-0.0711711663058945	0.0151357925882975
chr15:78606863	CHRNA3	+	0.632315031515799	0.725775334996934	-0.0934603034811351	-9.81543729205849	15.0892583949033	6.05044774362378e-08	7.02205212758547e-05	-0.113745017408356	-0.0731755895539143	0.00952176665187931
chr15:79395123	TMED3	-	0.502686850498621	0.590418192918193	-0.0877313424195716	-5.1878759729377	9.99022785234614	0.000409685542830922	0.00959948391218654	-0.125416039392044	-0.0500466454470989	0.0169108403665041
chr15:80798386	CEMIP	-	0.652708132694864	0.741869785987433	-0.0891616532925688	-5.4380803545159	15.863804397496	5.63668040254908e-05	0.00297935503809193	-0.123943454893503	-0.0543798516916341	0.0163957954792866
chr15:81406734	TMC3-AS1	-	0.500786720250501	0.594753222926597	-0.0939665026760963	-4.61482562961252	12.0643017317204	0.000587304063195205	0.0118825866694649	-0.138305005744446	-0.0496279996077465	0.020361875012813
chr15:81678568	AC060809.1	+	0.614621705365509	0.712751322751323	-0.098129617385814	-7.09119736089871	10.6953083881624	2.34011253174053e-05	0.00177842251624634	-0.128693554356941	-0.067565680414687	0.0138382296235198
chr15:81678568	AC023034.1	+	0.614621705365509	0.712751322751323	-0.098129617385814	-7.09119736089871	10.6953083881624	2.34011253174053e-05	0.00177842251624634	-0.128693554356941	-0.067565680414687	0.0138382296235198
chr15:81678568	AC104041.1	+	0.614621705365509	0.712751322751323	-0.098129617385814	-7.09119736089871	10.6953083881624	2.34011253174053e-05	0.00177842251624634	-0.128693554356941	-0.067565680414687	0.0138382296235198
chr15:81815812	AC104041.1	-	0.59375007351309	0.721064877563929	-0.127314804050839	-9.26497449259639	17.4141291813609	3.80477076452551e-08	5.57600445108541e-05	-0.156254438471918	-0.0983751696297589	0.0137415169521055
chr15:81883928	AC104041.1	+	0.642800190251539	0.734092382505695	-0.091292192254156	-7.06072944808316	10.8169202806973	2.29156378369884e-05	0.00175323388323792	-0.119808858494563	-0.0627755260137486	0.0129295695190445
chr15:81993643	AC104041.1	+	0.541494812507903	0.628234600648394	-0.0867397881404907	-4.94651790376614	14.0015014456417	0.000214767873730371	0.00653561273801317	-0.124349370262783	-0.0491302060181981	0.0175355249547261
chr15:82612294	CPEB1	+	0.63816282294417	0.791603535353535	-0.153440712409366	-10.7077982614221	17.5906728369892	3.93675364532401e-09	2.00702843876203e-05	-0.183596819257496	-0.123284605561235	0.0143298097949958
chr15:82793468	FSD2	-	0.610632459338784	0.698526805320284	-0.0878943459814996	-7.74789925764328	12.1846683763197	4.74243347261761e-06	0.000707476118914481	-0.112569927352892	-0.0632187646101067	0.0113442809539363
chr15:83170968	HDGFL3	+	0.471249432579356	0.564965902216356	-0.093716469637	-3.83589706703693	9.9847288417625	0.0032962302982913	0.0335740059148027	-0.148164386672199	-0.0392685526018007	0.0244314349418641
chr15:83316142	AC103876.1	-	0.586944404801548	0.718946988683831	-0.132002583882283	-6.16654977959142	8.97435736489459	0.00016737177720987	0.00563766213239232	-0.180447940524629	-0.0835572272399374	0.021406230161176
chr15:83384882	AC103876.1	+	0.651491230948855	0.744670557165684	-0.0931793262168286	-3.85790255250385	11.9721899398094	0.00228670966095125	0.0268095388986784	-0.145817417789431	-0.0405412346442266	0.0241528459956443
chr15:83429217	AC103876.1	+	0.578736399906332	0.67206014505595	-0.0933237451496174	-4.72236041336162	10.2157343160076	0.00076739357006771	0.0139342724534811	-0.137230723151993	-0.0494167671472414	0.0197620971253198
chr15:83837126	ADAMTSL3	+	0.565024557938118	0.66624649859944	-0.101221940661322	-5.01643034310397	6.51180038441159	0.00190126078151651	0.0239864527531384	-0.14967034453533	-0.0527735367873137	0.0201780815715841
chr15:84028199	ADAMTSL3	+	0.562300355188722	0.668177247589012	-0.10587689240029	-7.25805613791336	14.9781239288716	2.81842426125876e-06	0.000529625927153465	-0.136973367893974	-0.0747804169066057	0.0145874997917457
chr15:84114087	EFL1P1	-	0.668386349755213	0.751053916843391	-0.0826675670881775	-5.57519236994265	8.32278179026548	0.000456504746786951	0.0102408433317123	-0.116630967493756	-0.0487041666825992	0.0148277515111156
chr15:85048517	PDE8A	-	0.456712908363486	0.27552644617862	0.181186462184866	3.80234907399808	15.6537310475514	0.00162019332146717	0.0218034731456753	0.0799885389248334	0.282384385444899	0.047651191055521
chr15:86697411	AGBL1	-	0.653494798430512	0.475866200119459	0.177628598311053	5.32821786119617	12.4103328484536	0.000160446590075799	0.00549542421066578	0.105258248843565	0.249998947778541	0.0333373377249961
chr15:87406450	AC020687.1	+	0.553486295450581	0.665826637672613	-0.112340342222032	-9.13736037066482	17.2302786310168	5.09719470616456e-08	6.38855947865796e-05	-0.138253332620821	-0.0864273518232431	0.0122946165703059
chr15:87623177	AC020687.1	+	0.487799889661242	0.621625816677072	-0.133825927015829	-8.58310554585917	13.3174596310622	8.6213851967181e-07	0.00027243847484488	-0.167428487302741	-0.100223366728918	0.0155917839179308
chr15:88594332	LINC01586	-	0.616913344285082	0.718642631482922	-0.101729287197839	-6.59691320978036	7.90990180340054	0.000178735470769468	0.00585524623567379	-0.137360206922001	-0.0660983674736781	0.0154207405740944
chr15:90286580	AC091167.6	+	0.618589848001569	0.720662931839402	-0.102073083837834	-6.05028905829146	14.2792902445619	2.7436724770717e-05	0.00195756453827956	-0.138191019783014	-0.0659551478926536	0.0168707780495132
chr15:90574803	CRTC3	-	0.539196409762531	0.625374428427497	-0.0861780186649665	-4.30640372750718	8.15508242980865	0.00247986172119332	0.0281606917657872	-0.132172540057147	-0.040183497272786	0.0200115976387685
chr15:90574846	CRTC3	-	0.584006495679397	0.684207054293876	-0.10020055861448	-4.98602754317814	7.45202431747089	0.00132247765264685	0.0192412040964871	-0.147142554781959	-0.0532585624470006	0.0200962705774808
chr15:91212906	SV2B	+	0.637541775696906	0.720187969924812	-0.0826461942279059	-5.94073117797288	8.91417930595228	0.000226233009142613	0.00673514635804375	-0.11416309145379	-0.0511292970020221	0.0139117882550119
chr15:91288788	SV2B	-	0.607726024135714	0.709494134897361	-0.101768110761646	-5.82970565216839	12.8347011281005	6.18739484066387e-05	0.00314262028243853	-0.139530706730044	-0.0640055147932482	0.0174568180339934
chr15:91440604	AC104035.1	+	0.660889326114871	0.763075443075443	-0.102186116960572	-11.0474280345571	15.8165343312049	7.62894295232774e-09	2.61539937928772e-05	-0.121813245455308	-0.0825589884658362	0.0092497653427501
chr15:92756126	FAM174B	+	0.660980863330487	0.760553414259555	-0.0995725509290672	-6.1427398400827	8.85870333415638	0.000181765879691236	0.00591273032774365	-0.136331003296659	-0.0628140985614757	0.0162097945739676
chr15:94884443	AC087633.2	-	0.631735301735302	0.752518566291911	-0.120783264556609	-3.65910887961542	8.73631437290296	0.0055136296769456	0.0458225576177362	-0.195799622434	-0.0457669066792187	0.0330089288212992
chr15:94959206	AC087633.2	+	0.599760900388442	0.684720697764176	-0.0849597973757342	-7.35418755410638	16.8485715730255	1.18860121202594e-06	0.000324330478054108	-0.10935029640107	-0.0605692983503984	0.0115525741967643
chr15:95197644	LINC01197	+	0.598487751945785	0.704994486896764	-0.106506734950979	-5.66186686136678	17.9409181404947	2.29713343601837e-05	0.00175578179389604	-0.146037014136107	-0.0669764557658502	0.0188112397480975
chr15:95230353	LINC01197	+	0.46324235447363	0.576463732346085	-0.113221377872456	-6.2995328492903	12.6129645872926	3.15181098658508e-05	0.00212164995443634	-0.152171105054715	-0.0742716506901963	0.0179729799940977
chr15:95243249	LINC01197	+	0.527529465512397	0.609610000429679	-0.0820805349172821	-6.46107582006122	14.8995737460681	1.10860726094426e-05	0.00115601017374967	-0.109174053833544	-0.0549870160010198	0.0127038495141053
chr15:95316072	LINC01197	+	0.603763124815143	0.687493869081305	-0.0837307442661619	-5.4021220176807	9.83582729323813	0.000318196706953665	0.00825141248174356	-0.118344305974825	-0.0491171825574991	0.0154996025621261
chr15:96269826	AC012409.2	+	0.560936530153059	0.641418479692488	-0.0804819495394288	-6.52768103031197	17.9880876266453	3.90796019067308e-06	0.000636857618740323	-0.106386145459029	-0.0545777536198283	0.0123293324483384
chr15:96269826	NR2F2-AS1	+	0.560936530153059	0.641418479692488	-0.0804819495394288	-6.52768103031197	17.9880876266453	3.90796019067308e-06	0.000636857618740323	-0.106386145459029	-0.0545777536198283	0.0123293324483384
chr15:97305753	LINC02253	-	0.549380716540595	0.633872295454005	-0.0844915789134093	-6.35290601005016	10.2383525939729	7.49008460642002e-05	0.00352492053571508	-0.114031852838208	-0.0549513049886105	0.013299674004266
chr15:97305753	AC020704.1	-	0.549380716540595	0.633872295454005	-0.0844915789134093	-6.35290601005016	10.2383525939729	7.49008460642002e-05	0.00352492053571508	-0.114031852838208	-0.0549513049886105	0.013299674004266
chr15:97420554	LINC02253	+	0.614278677113898	0.694342461504933	-0.0800637843910348	-4.49955909169363	17.1012651107163	0.000311750738480689	0.00814808905655143	-0.117588273416977	-0.0425392953650926	0.0177936955064855
chr15:97420554	LINC02254	+	0.614278677113898	0.694342461504933	-0.0800637843910348	-4.49955909169363	17.1012651107163	0.000311750738480689	0.00814808905655143	-0.117588273416977	-0.0425392953650926	0.0177936955064855
chr15:97421447	LINC02254	+	0.609796665817472	0.703111598403753	-0.0933149325862808	-5.20505360254089	17.3620463390602	6.68934723578506e-05	0.00328737623148174	-0.131079198070437	-0.0555506671021249	0.0179277563137349
chr15:97421447	LINC02253	+	0.609796665817472	0.703111598403753	-0.0933149325862808	-5.20505360254089	17.3620463390602	6.68934723578506e-05	0.00328737623148174	-0.131079198070437	-0.0555506671021249	0.0179277563137349
chr15:97642899	LINC00923	+	0.554631545796818	0.641498252705149	-0.0868667069083309	-4.73785460444059	11.1233754998184	0.000593133706296015	0.0119580609695487	-0.127166365322371	-0.0465670484942909	0.018334607994706
chr15:97645188	LINC00923	+	0.511686919076098	0.600565436978481	-0.0888785179023823	-4.46794947727895	13.133380334072	0.000618097399887567	0.01225970201174	-0.131809246562998	-0.0459477892417663	0.0198924626060254
chr15:97666922	LINC00923	-	0.66157491323275	0.7501539408867	-0.0885790276539492	-5.2913559101716	9.61844734402142	0.000400603995456446	0.00947034072611844	-0.126080339440558	-0.0510777158673403	0.0167403268949785
chr15:98027268	LINC02251	+	0.614276001776002	0.703876678876679	-0.089600677100677	-3.75137773524845	10.3621806014259	0.00354887928112194	0.0351215209962404	-0.142568131633154	-0.0366332225681999	0.0238847387344593
chr15:98073572	LINC02251	-	0.470683948012323	0.561579284912618	-0.0908953369002949	-4.99372644098262	10.3471957757129	0.000489154127185445	0.010674963584354	-0.131268002923608	-0.050522670876982	0.0182019055257679
chr15:98073572	AC022523.1	-	0.470683948012323	0.561579284912618	-0.0908953369002949	-4.99372644098262	10.3471957757129	0.000489154127185445	0.010674963584354	-0.131268002923608	-0.050522670876982	0.0182019055257679
chr15:98087788	AC022523.1	+	0.626315666059888	0.726774042950514	-0.100458376890626	-6.94368033943356	16.2131987831973	3.07630785962087e-06	0.000553731275255466	-0.13109557018665	-0.0698211835946021	0.0144675981583019
chr15:98087788	LINC01582	+	0.626315666059888	0.726774042950514	-0.100458376890626	-6.94368033943356	16.2131987831973	3.07630785962087e-06	0.000553731275255466	-0.13109557018665	-0.0698211835946021	0.0144675981583019
chr15:98487437	FAM169B	-	0.635501361629181	0.719377844377844	-0.0838764827486632	-6.13429888421463	9.26782942931347	0.000152195262892245	0.00532362639341073	-0.114672050074524	-0.0530809154228027	0.0136733609385259
chr15:98494814	FAM169B	-	0.565482052224644	0.673198043786279	-0.107715991561635	-4.96748998872334	8.7129390969102	0.00085095705517862	0.0148204433219214	-0.15701649887321	-0.0584154842500606	0.0216841889578359
chr15:98522495	FAM169B	-	0.595752403638348	0.680472983806317	-0.0847205801679688	-5.73002788860399	12.3005070152403	8.59328200502702e-05	0.00381750223345331	-0.116848061849201	-0.0525930984867361	0.014785369602906
chr15:99023318	LUNAR1	-	0.604258977574828	0.700124475959283	-0.0958654983844556	-5.35469166174894	7.76984162862855	0.000751424685091896	0.0137575973032568	-0.137363925476687	-0.054367071292224	0.0179030847040676
chr15:99023318	AC036108.1	-	0.604258977574828	0.700124475959283	-0.0958654983844556	-5.35469166174894	7.76984162862855	0.000751424685091896	0.0137575973032568	-0.137363925476687	-0.054367071292224	0.0179030847040676
chr15:99279952	LRRC28	-	0.596914765378247	0.707106666816812	-0.110191901438564	-7.89058022076279	11.1061843545743	7.01606818490509e-06	0.000890909352826256	-0.140892829065384	-0.0794909738117445	0.0139649934929515
chr15:99280867	LRRC28	-	0.41119342541335	0.505898366606171	-0.0947049411928204	-4.40136727782546	15.6940863128755	0.000465616593808433	0.0103618380889235	-0.140391659664109	-0.0490182227215318	0.0215171639208465
chr16:11954578	NPIPB2	+	0.635493705117657	0.716184438167197	-0.0806907330495398	-8.54319855980711	16.9991177012374	1.47606541301523e-07	0.000109091311440103	-0.10061807495563	-0.0607633911434494	0.0094450260619205
chr16:12234908	SNX29	-	0.545495521248368	0.633094590594591	-0.0875990693462227	-5.75775991564142	11.7055468864717	9.97149392998579e-05	0.00417828688793677	-0.120840439501216	-0.0543576991912294	0.0152140885743174
chr16:137817	NPRL3	-	0.572833839093238	0.716864855990243	-0.144031016897005	-7.18752647222263	12.0163792782137	1.09721266035361e-05	0.00114927262271936	-0.187685700195941	-0.10037633359807	0.020039024197495
chr16:14488228	PARN	+	0.634099116995536	0.747443222833028	-0.113344105837491	-6.98036397451001	17.907835223164	1.65988397337056e-06	0.000393969804086557	-0.147470550833825	-0.0792176608411576	0.016237563865063
chr16:15765244	MYH11	+	0.655641195447991	0.735983406461049	-0.0803422110130581	-8.57833790229818	17.3932881901491	1.16756354448293e-07	9.8688272582672e-05	-0.100068147534819	-0.0606162744912967	0.00936570836076928
chr16:16197367	ABCC6	+	0.559153138927022	0.652249607977162	-0.09309646905014	-4.73476765591742	9.19259560455822	0.00100639829117124	0.016364868301719	-0.137434055315857	-0.0487588827844226	0.0196623099200633
chr16:16547080	AC136431.1	-	0.623619828264847	0.724121811618745	-0.100501983353897	-9.35047188402545	13.0505388910368	3.77938109893077e-07	0.000178489684852117	-0.123713207037787	-0.0772907596700076	0.010748332768702
chr16:18038803	AC091489.1	-	0.631516295329321	0.731996434937611	-0.100480139608291	-6.19061057714308	8.32818762325949	0.000222083164821314	0.00666445859503851	-0.13765383108154	-0.0633064481350419	0.0162310548137663
chr16:18038803	AC010601.1	-	0.631516295329321	0.731996434937611	-0.100480139608291	-6.19061057714308	8.32818762325949	0.000222083164821314	0.00666445859503851	-0.13765383108154	-0.0633064481350419	0.0162310548137663
chr16:18055835	AC091489.1	+	0.451835173267907	0.533788954279367	-0.0819537810114604	-4.00267157986057	8.20427854925755	0.00373790970715157	0.0362302704112017	-0.128964836629177	-0.0349427253937434	0.020474770256898
chr16:18055835	AC010601.1	+	0.451835173267907	0.533788954279367	-0.0819537810114604	-4.00267157986057	8.20427854925755	0.00373790970715157	0.0362302704112017	-0.128964836629177	-0.0349427253937434	0.020474770256898
chr16:18121014	AC010601.1	-	0.664137848735372	0.756408808582722	-0.0922709598473497	-7.59994968302663	16.8202582168336	7.79844865214125e-07	0.000257246870812005	-0.117907089904314	-0.0666348297903855	0.0121409961507276
chr16:18121014	AC091489.1	-	0.664137848735372	0.756408808582722	-0.0922709598473497	-7.59994968302663	16.8202582168336	7.79844865214125e-07	0.000257246870812005	-0.117907089904314	-0.0666348297903855	0.0121409961507276
chr16:20706075	THUMPD1	+	0.656254941306996	0.742923465927096	-0.0866685246201001	-5.58752780017195	6.96543484150575	0.000840951400584371	0.014708988958465	-0.123383301470249	-0.0499537477699516	0.0155110681717652
chr16:20706075	ACSM3	+	0.656254941306996	0.742923465927096	-0.0866685246201001	-5.58752780017195	6.96543484150575	0.000840951400584371	0.014708988958465	-0.123383301470249	-0.0499537477699516	0.0155110681717652
chr16:21093771	DNAH3	+	0.62354214306669	0.718601455329144	-0.0950593122624543	-5.24058131835194	16.9659914330907	6.68779919521148e-05	0.00328699950206384	-0.133335265714779	-0.0567833588101293	0.0181390778022215
chr16:21284395	CRYM	-	0.51035533456039	0.414875329349014	0.0954800052113761	3.93621458470852	9.03124748433125	0.00340245190127589	0.0342353255765349	0.0406362182002654	0.150323792222487	0.0242568089611523
chr16:21335459	CRYM-AS1	-	0.620908650682629	0.701018997105954	-0.0801103464233244	-6.61616201608227	14.4235854052611	9.98287322993179e-06	0.00108825347622477	-0.106008656977507	-0.0542120358691415	0.0121082806359028
chr16:22567654	OTOAP1	+	0.525777492631208	0.636300959625768	-0.11052346699456	-6.52844180280296	10.9885267118451	4.27988649448112e-05	0.00253848676685987	-0.147789863820604	-0.0732570701685158	0.0169295323957866
chr16:23703342	AC008870.1	-	0.45596023556884	0.574546114742193	-0.118585879173353	-5.12970114895385	8.42188326375616	0.000763496326380852	0.0138932736033319	-0.171433665764115	-0.0657380925825917	0.023117502507439
chr16:2384585	ABCA17P	-	0.485376455555027	0.60583588524765	-0.120459429692623	-3.2890662780486	13.3037281124817	0.00571037815466373	0.0468050027780943	-0.199397977246359	-0.0415208821388866	0.0366242025880037
chr16:24635440	TNRC6A	-	0.558997764380677	0.651469068135735	-0.0924713037550575	-6.52364501698497	13.7732282448796	1.45967038606524e-05	0.00134934148490085	-0.122920234128806	-0.0620223733813086	0.0141747908591438
chr16:25794446	AC093516.1	-	0.635231282211691	0.745374469296883	-0.110143187085192	-5.3529431159669	17.8099172030554	4.51022606066601e-05	0.00262242367033459	-0.153405258054887	-0.066881116115497	0.020576192329908
chr16:25794446	HS3ST4	-	0.635231282211691	0.745374469296883	-0.110143187085192	-5.3529431159669	17.8099172030554	4.51022606066601e-05	0.00262242367033459	-0.153405258054887	-0.066881116115497	0.020576192329908
chr16:25821293	AC093516.1	-	0.645071250804333	0.729843073593074	-0.0847718227887402	-3.88770216879709	16.6084434513327	0.00122886553299719	0.0184167350971734	-0.130859369755708	-0.0386842758217725	0.0218051226941002
chr16:25821293	HS3ST4	-	0.645071250804333	0.729843073593074	-0.0847718227887402	-3.88770216879709	16.6084434513327	0.00122886553299719	0.0184167350971734	-0.130859369755708	-0.0386842758217725	0.0218051226941002
chr16:26326372	AC009158.1	+	0.606189263172969	0.709681686294589	-0.10349242312162	-7.06029349715809	10.6218417224436	2.52322083690404e-05	0.00186183513044942	-0.135895980820899	-0.071088865422341	0.0146583740694743
chr16:31761414	ZNF720	-	0.376846184787258	0.21697586417414	0.159870320613118	3.65515503004788	11.9127820484804	0.00333349486578639	0.0338095331467549	0.0644952796364931	0.255245361589743	0.0437383145992098
chr16:31774663	ZNF720	+	0.595979660889762	0.699013565360819	-0.103033904471057	-4.23594487255444	6.74267926626772	0.00420065059131226	0.0388764504100919	-0.160998316074035	-0.045069492868079	0.0243237123170878
chr16:32082886	AC142381.4	+	0.525930023409832	0.656769612202549	-0.130839588792717	-4.45126883325878	6.63592888354995	0.00338219086352886	0.0341029443283443	-0.201125368265403	-0.060553809320031	0.0293937737067499
chr16:32126252	HERC2P4	-	0.590305323761206	0.508552136269528	0.0817531874916786	4.53995894675131	10.3014408373608	0.000996607864906244	0.0162625486380019	0.0417886149593827	0.121717760023975	0.0180074728539515
chr16:32396737	AC138915.2	-	0.545488154604033	0.415699891067538	0.129788263536495	5.72259487506716	6.88752350001006	0.000761159245469793	0.0138613761788241	0.0759806117679743	0.183595915305015	0.022679967107574
chr16:32819064	AC137761.1	-	0.597154157294822	0.681190154874365	-0.0840359975795432	-4.4498906617258	10.844664455707	0.00101333803715745	0.0164314356653629	-0.125674264076872	-0.0423977310822148	0.0188849578490433
chr16:33018618	AC142086.5	+	0.597659769649487	0.677671275085068	-0.0800115054355816	-3.73711373559405	7.60798577611495	0.00627053735507944	0.0495538254309111	-0.129829326147367	-0.0301936847237961	0.0214099733367797
chr16:33065251	AC145350.2	+	0.561669405821844	0.649481020909592	-0.0878116150877487	-7.68581674050334	14.1707858855379	2.01617878712496e-06	0.000437884370099391	-0.112288448764177	-0.0633347814113205	0.0114251507748021
chr16:34141925	DUX4L46	+	0.372165358342214	0.509639365192771	-0.137474006850557	-4.92929496999617	7.48433686158367	0.00139707920252772	0.0199036540091994	-0.202566090540399	-0.0723819231607151	0.0278891824667299
chr16:3967270	ADCY9	-	0.653514291091931	0.747496411970096	-0.0939821208781654	-5.90335949757312	17.4342188351603	1.5658218184465e-05	0.00140608129149847	-0.127506999764076	-0.0604572419922546	0.0159201080193069
chr16:46754083	MYLK3	+	0.63133558288399	0.722092699144038	-0.0907571162600473	-6.04895708200659	6.64846660952647	0.000629062903896329	0.0123821669249172	-0.126619219674739	-0.0548950128453553	0.0150037626370364
chr16:47096090	NETO2	+	0.570110779185496	0.652250712250712	-0.0821399330652163	-4.07207714432418	10.5700250208789	0.00200123132566582	0.0247396437716573	-0.126758464108501	-0.0375214020219314	0.0201715071090208
chr16:47775650	LINC02133	+	0.6198058901701	0.747648002582213	-0.127842112412113	-6.64711332200353	7.65644010163923	0.000196368888409351	0.00619220628590862	-0.172541663950047	-0.0831425608741789	0.019232726481272
chr16:49118329	AC044798.3	-	0.435075459407349	0.524625441162334	-0.0895499817549851	-3.42778611227886	12.8883146582551	0.0045475861438825	0.0408286655373427	-0.146038783275676	-0.0330611802342945	0.0261247285629063
chr16:49166152	AC044798.3	+	0.638661347781109	0.794759475996035	-0.156098128214927	-4.92277962749465	8.31328696825729	0.00103679083484236	0.0166574658639342	-0.228743129274721	-0.0834531271551323	0.0317093471629502
chr16:49320374	AC007614.1	-	0.542765286745168	0.631207776125968	-0.0884424893807995	-7.28328725719772	8.57173374534862	5.98977088690991e-05	0.00308494422002686	-0.116122982675076	-0.0607619960865224	0.012143210374326
chr16:49506752	ZNF423	+	0.601091160618346	0.685188307063307	-0.0840971464449607	-7.27372887077664	11.8765607491707	1.0410341588868e-05	0.00111498306082341	-0.109317138306175	-0.0588771545837467	0.0115617653529587
chr16:50117549	AC007610.3	+	0.703682659169916	0.83211521961522	-0.128432560445304	-4.04848515067819	17.5342584561584	0.000789766329354818	0.0141752750626822	-0.195208512026381	-0.0616566088642273	0.031723609119275
chr16:52010436	C16orf97	-	0.587697565822395	0.679285365381027	-0.0915877995586319	-4.74449326718522	8.81504367448392	0.00111431927720302	0.0173914598595318	-0.135396599190964	-0.0477789999263002	0.0193040213993113
chr16:52040398	C16orf97	-	0.595653302881976	0.677040138224349	-0.0813868353423725	-4.35724035637051	8.32232373700937	0.0022046311258672	0.0262302705284498	-0.124170944021032	-0.0386027266637131	0.0186785278492568
chr16:53376749	AC007342.4	-	0.599674389099199	0.681535008201675	-0.0818606191024756	-4.24638766612023	10.5167544438549	0.00151827155281456	0.0209267613472078	-0.12452965455044	-0.0391915836545109	0.0192777074395727
chr16:53914294	FTO	-	0.446351306723101	0.360746914668483	0.0856043920546176	3.83716613133508	17.9996525824928	0.00120718611223582	0.0182284348574273	0.0387342809686085	0.132474503140627	0.0223092743771386
chr16:54910737	CRNDE	+	0.663177771108443	0.786555783397889	-0.123378012289445	-4.41383234878711	8.83851801742495	0.00176195385442698	0.0229403160335181	-0.186787692194627	-0.0599683323842635	0.0279525823683241
chr16:55912497	CES5A	+	0.518379048172507	0.617485380116959	-0.0991063319444516	-7.09596740223984	15.5074657487348	3.02431232310199e-06	0.000548271841503257	-0.128790750786138	-0.0694219131027656	0.0139665709164854
chr16:55912664	CES5A	+	0.604856401276829	0.687790736395388	-0.0829343351185589	-4.89188865075092	12.458780739224	0.000332781938970711	0.0084808557731607	-0.119722407238239	-0.0461462629988791	0.0169534388534842
chr16:55950884	CES5A	+	0.629569117668874	0.728114478114478	-0.0985453604456045	-6.82639945215642	9.17864920343463	6.97909596099084e-05	0.00337238538549187	-0.131105048659731	-0.0659856722314775	0.0144359205956626
chr16:56893738	SLC12A3	-	0.619671357276399	0.706313131313131	-0.086641774036732	-4.9703298050011	10.5314388514935	0.000480653236380756	0.0105613049278674	-0.125218196045474	-0.0480653520279902	0.0174317957632417
chr16:57556211	ADGRG5	-	0.647330204218649	0.732350079911055	-0.0850198756924068	-11.7152958526114	10.5145132418106	2.29080375804738e-07	0.000137381755206763	-0.101083240154057	-0.0689565112307564	0.0072571684712047
chr16:57580341	ADGRG5	+	0.541939663121013	0.630587559405097	-0.0886478962840833	-4.65444598575538	10.9272341727852	0.000712438205639879	0.0133283558885998	-0.130601620130664	-0.0466941724375024	0.0190458534818933
chr16:5762451	RBFOX1	+	0.526339118643409	0.611481801222513	-0.0851426825791045	-4.54776326332852	13.2653185928392	0.000520563593233142	0.0110457943500547	-0.125506767834845	-0.0447785973233643	0.0187218809883231
chr16:57709275	DRC7	-	0.631744208481024	0.723194962931805	-0.0914507544507812	-6.06144170728808	16.1761182013404	1.57364026615019e-05	0.00141112676223775	-0.123406111708141	-0.0594953971934215	0.0150872942225649
chr16:5785550	RBFOX1	-	0.562878292342578	0.648492660720922	-0.0856143683783436	-3.96676545923974	6.57787052645876	0.00613999200238513	0.0489320810973542	-0.137321357324964	-0.0339073794317232	0.0215829166755809
chr16:57858020	KIFC3	-	0.562069687846085	0.644756274175512	-0.0826865863294266	-4.4629965044918	14.2137549976447	0.000517040687757456	0.0110064847325137	-0.122367371495237	-0.0430058011636165	0.0185271456623832
chr16:58137834	AC009107.2	+	0.633239244587027	0.832725525052891	-0.199486280465864	-9.56729979673211	16.2904644112362	4.31809534273812e-08	5.85621924453428e-05	-0.24362412896218	-0.155348431969548	0.0208508445124718
chr16:58240362	CCDC113	-	0.495014641919291	0.583242683242683	-0.0882280413233924	-8.46384008477957	17.8914392959355	1.13970319470862e-07	9.73325926830202e-05	-0.110137823040445	-0.0663182596063401	0.0104241148745298
chr16:58357467	GINS3	-	0.656378389774113	0.755445208386385	-0.0990668186122717	-9.66076264550121	17.9136673326966	1.58388419049551e-08	3.71310339123023e-05	-0.120618283311478	-0.0775153539130651	0.0102545546606928
chr16:58875959	AC106793.1	-	0.614273766099606	0.747900665642601	-0.133626899542995	-4.875154222636	8.93313723372337	0.000896354866673152	0.0152751797122445	-0.19570294430836	-0.0715508547776307	0.0274097789404379
chr16:58875959	AC092378.1	-	0.614273766099606	0.747900665642601	-0.133626899542995	-4.875154222636	8.93313723372337	0.000896354866673152	0.0152751797122445	-0.19570294430836	-0.0715508547776307	0.0274097789404379
chr16:59047147	AC106793.1	+	0.629053226431046	0.751474986129718	-0.122421759698672	-4.63661900816772	6.77632824357092	0.00259019180824259	0.0289156606908709	-0.185275699596802	-0.0595678198005418	0.0264032389728415
chr16:59894699	LINC02141	-	0.586036873222335	0.671436206944072	-0.0853993337217371	-7.80155426396127	11.4988396782619	6.32198817832048e-06	0.000836858709167463	-0.109365401831568	-0.0614332656119064	0.0109464512880764
chr16:59924069	LINC02141	+	0.64202854826141	0.728971138510612	-0.0869425902492023	-4.2769289162451	5.99141617167172	0.00524025979105168	0.0444249500529675	-0.136701368720268	-0.0371838117781368	0.020328275721153
chr16:59979784	LINC02141	+	0.564673040415486	0.64560648501825	-0.0809334446027641	-3.97665739061232	7.60820089276016	0.00451621294030345	0.0406629737802379	-0.128289572499381	-0.0335773167061475	0.020352129100642
chr16:60518911	AC009081.1	+	0.590326903923376	0.68539800623134	-0.0950711023079641	-7.91343453378589	9.72687119363586	1.52849826258761e-05	0.00138686109235053	-0.121941945767965	-0.0682002588479629	0.0120138862464919
chr16:63409480	AC138305.1	+	0.583596870965292	0.674216581014827	-0.0906197100495346	-5.1624966805248	8.32397166988551	0.000759729729281149	0.0138489250199252	-0.130825482974939	-0.05041393712413	0.0175534660179815
chr16:63517788	AC138305.1	-	0.587534064849824	0.674451208009533	-0.0869171431597094	-4.94860463017925	12.4975230874696	0.000298952907053225	0.00793767438924226	-0.125017460969633	-0.0488168253497856	0.0175639699784545
chr16:63755019	LINC02165	+	0.531089348978602	0.644108251951389	-0.113018902972787	-5.9575116157435	9.42843416109673	0.000177205253079553	0.00582428222942424	-0.155638456952378	-0.0703993489931951	0.0189708237704681
chr16:6426531	RBFOX1	+	0.492792213017763	0.609104751084156	-0.116312538066393	-6.04524167860501	12.4066585018614	5.03733356944027e-05	0.0027983815542548	-0.158081758661297	-0.0745433174714894	0.0192403454237471
chr16:6426563	RBFOX1	+	0.567433478114593	0.673097643097643	-0.10566416498305	-5.18963058047756	9.94214708884528	0.000415065129001604	0.00967413649225588	-0.151066291174948	-0.0602620387911524	0.0203606332559662
chr16:64286068	AC012322.1	+	0.448058698508206	0.543040293040293	-0.0949815945320871	-3.26444392535327	17.9803346961183	0.00431092645943627	0.0395196007344681	-0.156114386230181	-0.0338488028339936	0.0290957960081389
chr16:64529777	AC092131.1	+	0.605110138807834	0.713505192537451	-0.108395053729616	-5.5826979686725	9.41076882633566	0.000290857129067437	0.00781376060576407	-0.152027145408193	-0.0647629620510403	0.0194162489781606
chr16:65148534	LINC02126	+	0.630214049422557	0.7204524233936	-0.0902383739710432	-4.22542530579242	7.50965042591902	0.00333756771395003	0.0338336884070598	-0.140050882781143	-0.0404258651609438	0.0213560452358109
chr16:65193107	AC009055.2	-	0.630212427873861	0.714629900543213	-0.0844174726693523	-6.75015922123495	8.68084751190866	9.91855094393303e-05	0.00416550213981799	-0.112867349548637	-0.0559675957900677	0.0125059972517075
chr16:65467750	LINC00922	+	0.597417285095857	0.705328662565505	-0.107911377469648	-5.15209758646234	10.0874715638706	0.000418343923442321	0.00971653712577671	-0.154525250229303	-0.0612975047099929	0.0209451346094834
chr16:65586193	AC092138.2	-	0.644210633092845	0.728508223802341	-0.0842975907094968	-4.27346777153552	7.50437823111946	0.00314061719388688	0.0325684626149032	-0.130313645837229	-0.0382815355817645	0.0197258047132078
chr16:65587609	AC092138.2	-	0.607632414580571	0.709556747600226	-0.101924333019655	-6.00249675986331	7.61364724991876	0.000391357132202219	0.00933990433650681	-0.141429602778391	-0.0624190632609182	0.0169803228718404
chr16:66659791	CMTM4	+	0.66246735521912	0.744138881862667	-0.0816715266435474	-5.86158291433551	13.5412196623309	4.73089476487229e-05	0.00269676480773791	-0.111650872101319	-0.0516921811857755	0.0139333568827979
chr16:68118664	NFATC3	-	0.643931780615656	0.727950310559006	-0.0840185299433506	-4.72619363472421	8.24610694474859	0.00137183884682951	0.0196822987149807	-0.124800855694785	-0.0432362041919159	0.0177772085608281
chr16:68118664	AC130462.3	-	0.643931780615656	0.727950310559006	-0.0840185299433506	-4.72619363472421	8.24610694474859	0.00137183884682951	0.0196822987149807	-0.124800855694785	-0.0432362041919159	0.0177772085608281
chr16:68177347	NFATC3	-	0.636743809400389	0.764961077969139	-0.128217268568749	-5.00383255717611	13.2559733149324	0.000227551365443335	0.00675692703734271	-0.183465685253526	-0.072968851883973	0.025623812768249
chr16:6848728	RBFOX1	+	0.625601013892939	0.776857110660356	-0.151256096767417	-5.94308086462383	16.4274470923481	1.84931428860366e-05	0.00155057063151801	-0.205095486557851	-0.0974167069769823	0.0254507889447994
chr16:6951031	RBFOX1	-	0.538980228421222	0.626262218173983	-0.0872819897527607	-6.249118783192	17.2303066068207	8.28948897750704e-06	0.000974753236611786	-0.116719993114921	-0.0578439863906006	0.0139670876456245
chr16:70923233	HYDIN	+	0.651296008036388	0.749494949494949	-0.098198941458561	-7.19762395838865	9.37162956772452	4.13038531702022e-05	0.00248681266482557	-0.128876546252603	-0.0675213366645189	0.0136432442186859
chr16:71050621	HYDIN	+	0.604570580225711	0.703880650700826	-0.0993100704751155	-6.55903714214978	16.139682906849	6.29998125453656e-06	0.000834676543849963	-0.131384894110865	-0.0672352468393664	0.0151409526006383
chr16:71085929	HYDIN	-	0.443637624003407	0.573270202020202	-0.129632578016795	-4.49921627301794	7.51262566134661	0.0023467322960847	0.0272299745736558	-0.196831561310841	-0.062433594722748	0.0288122575467663
chr16:71085929	AC138625.2	-	0.443637624003407	0.573270202020202	-0.129632578016795	-4.49921627301794	7.51262566134661	0.0023467322960847	0.0272299745736558	-0.196831561310841	-0.062433594722748	0.0288122575467663
chr16:71142204	HYDIN	+	0.485569280343716	0.578468880906961	-0.0928996005632449	-4.22097881548724	8.07315939241567	0.00285298123972775	0.0307191963787081	-0.14357254325295	-0.0422266578735393	0.0220090184348677
chr16:7120238	RBFOX1	+	0.533926654459997	0.626461239067663	-0.0925345846076662	-5.95669894606781	10.633694676273	0.000109086664254875	0.00439105665217243	-0.126870129580922	-0.0581990396344108	0.0155345411016199
chr16:71510005	ZNF19	-	0.622134289001025	0.702928154221258	-0.0807938652202328	-5.67581806807389	13.9731443691897	5.76668195270393e-05	0.00301867405021976	-0.111329878680547	-0.0502578517599191	0.0142347524623266
chr16:72336957	LINC01572	-	0.627180566976306	0.726289493691871	-0.0991089267155648	-4.36570028967925	6.50914782550321	0.00391132693315932	0.0372309719345466	-0.153621597050664	-0.0445962563804661	0.0227017248412273
chr16:72452661	LINC01572	-	0.590414684195103	0.674496651507026	-0.0840819673119235	-7.96920898405341	17.708879462801	2.89957883401627e-07	0.000156785004639163	-0.106274639773124	-0.0618892948507231	0.0105508548565075
chr16:72452661	AC004158.1	-	0.590414684195103	0.674496651507026	-0.0840819673119235	-7.96920898405341	17.708879462801	2.89957883401627e-07	0.000156785004639163	-0.106274639773124	-0.0618892948507231	0.0105508548565075
chr16:72487040	LINC01572	-	0.634772067335093	0.757640235581412	-0.12286816824632	-12.8302508895025	16.3866312031996	5.7430386508148e-10	7.23658763994232e-06	-0.143130461369379	-0.10260587512326	0.0095764431502153
chr16:72487040	AC004158.1	-	0.634772067335093	0.757640235581412	-0.12286816824632	-12.8302508895025	16.3866312031996	5.7430386508148e-10	7.23658763994232e-06	-0.143130461369379	-0.10260587512326	0.0095764431502153
chr16:74044071	AC138627.1	+	0.610212458802684	0.707383937361054	-0.0971714785583696	-4.00094402998583	7.34447568769321	0.00469767357030858	0.0416410347584115	-0.154059873293503	-0.0402830838232357	0.0242871376930294
chr16:74205782	AC138627.1	+	0.586567011521341	0.682140045626888	-0.0955730341055466	-5.77437806956166	11.2137179291191	0.000114918249466059	0.00453043963137508	-0.131917507623675	-0.059228560587418	0.0165512255959371
chr16:7427444	RBFOX1	-	0.623290764707556	0.718477332852333	-0.0951865681447766	-7.95000775511484	14.296703544691	1.28181782180275e-06	0.000338382161873469	-0.12081649408196	-0.0695566422075932	0.0119731415461244
chr16:76252201	AC010528.1	-	0.593535718297552	0.708990649815118	-0.115454931517566	-4.61935762656489	8.02699499566002	0.00169654983283722	0.0224058570333912	-0.173056832093215	-0.057853030941916	0.0249937200907785
chr16:76253953	AC010528.1	-	0.578966541161919	0.711247787873175	-0.132281246711256	-7.40463421934559	13.7206831999693	3.75261165557793e-06	0.000622956644448356	-0.170670431220474	-0.0938920622020371	0.0178646564830513
chr16:76315101	AC106741.2	-	0.423064537167133	0.510373081244225	-0.0873085440770916	-3.53321158464035	17.3508441629046	0.00248757584599155	0.0282135000098094	-0.139363620395521	-0.0352534677586623	0.0247108167698309
chr16:76315101	CNTNAP4	-	0.423064537167133	0.510373081244225	-0.0873085440770916	-3.53321158464035	17.3508441629046	0.00248757584599155	0.0282135000098094	-0.139363620395521	-0.0352534677586623	0.0247108167698309
chr16:76318490	AC106741.2	-	0.508290216466908	0.631890201183679	-0.123599984716771	-4.7981952916246	14.9299524569757	0.000237729934424166	0.00693413369202201	-0.178527892059331	-0.0686720773742113	0.0257596819647001
chr16:76318490	CNTNAP4	-	0.508290216466908	0.631890201183679	-0.123599984716771	-4.7981952916246	14.9299524569757	0.000237729934424166	0.00693413369202201	-0.178527892059331	-0.0686720773742113	0.0257596819647001
chr16:76713473	AC106741.2	-	0.475818115194209	0.572362637362637	-0.0965445221684285	-4.19449284288421	14.8481821216221	0.000797877405744992	0.0142599215643298	-0.145647761147504	-0.0474412831893524	0.0230169714873188
chr16:77364868	ADAMTS18	+	0.355202777616567	0.254207433087751	0.100995344528816	6.78897863889607	13.5136716323707	1.05117292272975e-05	0.00112181549505506	0.0689806465327723	0.13301004252486	0.0148763679929973
chr16:78723338	WWOX	-	0.575847942286785	0.66118487993488	-0.0853369376480948	-4.24239289559255	12.9080070278635	0.000975479324789204	0.0160545943495699	-0.128824870119472	-0.0418490051767174	0.020115283932507
chr16:78813114	WWOX	-	0.561428358039611	0.666467639687454	-0.105039281647843	-4.86304873488005	7.89959849307137	0.00129694989901753	0.0190185628011894	-0.154958158221996	-0.0551204050736894	0.0215994713140446
chr16:79678423	LINC01229	-	0.454009374084562	0.537228684045074	-0.0832193099605121	-4.76069236360051	12.1764392337329	0.000445331825154622	0.010092228616854	-0.121244940794787	-0.0451936791262372	0.0174805056921539
chr16:79719569	LINC01229	+	0.374786406657525	0.573450854700855	-0.19866444804333	-4.3521485654745	14.1191328889657	0.000650784215977096	0.0126358793493488	-0.296491029921691	-0.100837866164969	0.0456474417301217
chr16:79719569	MAFTRR	+	0.374786406657525	0.573450854700855	-0.19866444804333	-4.3521485654745	14.1191328889657	0.000650784215977096	0.0126358793493488	-0.296491029921691	-0.100837866164969	0.0456474417301217
chr16:80770060	CDYL2	+	0.64165637673977	0.747465886939571	-0.105809510199801	-4.60817613109191	13.6090536828349	0.0004363324988574	0.0099626461476452	-0.155189560449273	-0.0564294599503294	0.022961255644265
chr16:80858892	AC009070.1	-	0.635745856660395	0.720152992713968	-0.0844071360535731	-3.94246142993087	11.3962697560377	0.00215302136169865	0.0258543185416007	-0.131330547604035	-0.0374837245031112	0.0214097556954547
chr16:80858892	ARLNC1	-	0.635745856660395	0.720152992713968	-0.0844071360535731	-3.94246142993087	11.3962697560377	0.00215302136169865	0.0258543185416007	-0.131330547604035	-0.0374837245031112	0.0214097556954547
chr16:80874768	AC009070.1	+	0.54304249871085	0.631338008969588	-0.0882955102587375	-6.44263041536599	8.45513175393056	0.000157038556197427	0.00542610427981449	-0.119605351904322	-0.0569856686131533	0.0137048852046748
chr16:80874768	ARLNC1	+	0.54304249871085	0.631338008969588	-0.0882955102587375	-6.44263041536599	8.45513175393056	0.000157038556197427	0.00542610427981449	-0.119605351904322	-0.0569856686131533	0.0137048852046748
chr16:82705828	CDH13	-	0.639039156332389	0.730916500653343	-0.0918773443209533	-4.70692136989866	17.9792936742022	0.000176275802960441	0.00580714459396585	-0.13288994224637	-0.0508647463955369	0.019519625908459
chr16:83265501	CDH13	-	0.588747684942482	0.672824097019969	-0.0840764120774866	-8.34969977292208	16.7418530999651	2.27162555808366e-07	0.000136886293823942	-0.105345956080181	-0.0628068680747925	0.0100693934349765
chr16:83554411	CDH13	+	0.552864092049103	0.653083028083028	-0.100218936033925	-4.31075479078217	17.9617048924631	0.000422787828860958	0.00978405922301437	-0.149069859771052	-0.051368012296798	0.0232485819532641
chr16:83565639	CDH13	-	0.567167670792799	0.658644596032757	-0.0914769252399579	-3.76505719573813	10.3481459431888	0.00347658904816475	0.0346864792490251	-0.145366573498895	-0.0375872769810203	0.0242962909948634
chr16:84324740	WFDC1	-	0.348102652085047	0.200655712850835	0.147446939234212	4.07839698639054	11.7300095706406	0.00160212046949415	0.0216494432580383	0.0684744125367056	0.226419465931719	0.0361531601083066
chr16:86522748	AC009108.3	-	0.478606857811927	0.371894398319615	0.106712459492312	4.56780541792529	15.4733305077346	0.000342816791475161	0.00863078088527812	0.0570501606439145	0.15637475834071	0.0233618663075148
chr16:87778320	AC126696.3	-	0.42878669109457	0.520682697973055	-0.0918960068784853	-6.87909118391	13.1095954675712	1.07165284953555e-05	0.00113440330401012	-0.12073130890461	-0.0630607048523601	0.0133587423718743
chr16:87778626	AC126696.3	-	0.562292352223103	0.662728701236592	-0.100436349013489	-6.33241307671107	14.6815088491599	1.48567333675719e-05	0.00136378704954164	-0.134306565226876	-0.0665661328001033	0.0158606755113414
chr16:9395230	LINC02177	-	0.5917069864383	0.681187837453822	-0.0894808510155221	-4.00396246068896	14.6120741583844	0.00120652876459402	0.018223828805284	-0.137225023544508	-0.0417366784865358	0.0223480744122974
chr16:9395230	AC012178.1	-	0.5917069864383	0.681187837453822	-0.0894808510155221	-4.00396246068896	14.6120741583844	0.00120652876459402	0.018223828805284	-0.137225023544508	-0.0417366784865358	0.0223480744122974
chr16:9605229	AC007221.1	-	0.518982981741247	0.650575319852647	-0.1315923381114	-10.32626818023	17.9450428709197	5.60770588200022e-09	2.30057763956118e-05	-0.158371222877542	-0.104813453345258	0.0127434554104782
chr16:9898700	GRIN2A	-	0.46450288335819	0.551651834755283	-0.0871489513970931	-4.82601836044627	10.1033590298888	0.000675854323220048	0.012919742783447	-0.127329286492549	-0.0469686163016366	0.0180581475013357
chr17:10046457	AC005747.1	+	0.673948302785293	0.755440917107584	-0.0814926143222908	-6.11434154273809	10.2756562264857	0.000101230235848918	0.0042126392177517	-0.111081861474123	-0.0519033671704588	0.0133281096178015
chr17:10046466	AC005747.1	+	0.633053724362158	0.736000457875458	-0.102946733513299	-7.01363960120396	17.5191859759559	1.76199554098948e-06	0.000407380643370286	-0.1338450033266	-0.0720484636999993	0.01467807577333
chr17:10172651	AC005747.1	+	0.441554601973154	0.357498018276723	0.0840565836964308	3.41742696642178	10.8957437189971	0.00582601372468999	0.0473862233692381	0.0298568873152929	0.138256280077569	0.0245964535664803
chr17:10426655	MYHAS	-	0.577603760753651	0.672410508594719	-0.094806747841068	-3.36747734333822	12.2456744170927	0.00545058748955566	0.0455141212628113	-0.156012049805601	-0.0336014458765354	0.0281536408934188
chr17:10426655	AC005323.2	-	0.577603760753651	0.672410508594719	-0.094806747841068	-3.36747734333822	12.2456744170927	0.00545058748955566	0.0455141212628113	-0.156012049805601	-0.0336014458765354	0.0281536408934188
chr17:10607729	AC005323.1	-	0.627399867788067	0.775127713920817	-0.147727846132751	-3.69716586992355	11.8917072137403	0.00309671477631843	0.0322859466215667	-0.234874793233703	-0.0605808990317986	0.0399570512468799
chr17:10607729	MYHAS	-	0.627399867788067	0.775127713920817	-0.147727846132751	-3.69716586992355	11.8917072137403	0.00309671477631843	0.0322859466215667	-0.234874793233703	-0.0605808990317986	0.0399570512468799
chr17:10856855	AC015908.2	+	0.563452816757434	0.648158438783439	-0.0847056220260051	-4.24070643714469	9.64715819716876	0.00185805772601916	0.0236675372944298	-0.129433021474327	-0.0399782225776831	0.0199744130562921
chr17:10856855	AC015908.7	+	0.563452816757434	0.648158438783439	-0.0847056220260051	-4.24070643714469	9.64715819716876	0.00185805772601916	0.0236675372944298	-0.129433021474327	-0.0399782225776831	0.0199744130562921
chr17:11344314	SHISA6	-	0.541539579218415	0.627334361544888	-0.0857947823264729	-3.74711562659682	7.76619350939831	0.00595807872323396	0.0480499774834474	-0.138871524630512	-0.0327180400224339	0.0228962196195672
chr17:11394620	SHISA6	-	0.594215749381426	0.698746780400006	-0.10453103101858	-7.24008190188409	17.6626103740951	1.10202429524748e-06	0.000311175235524992	-0.134905359907948	-0.0741567021292124	0.0144378243830886
chr17:11830741	DNAH9	+	0.563898471423903	0.698739272423483	-0.13484080099958	-6.01239838299754	17.9573120975169	1.10983266065417e-05	0.00115677513958745	-0.181966468958495	-0.0877151330406657	0.0224271234888387
chr17:11865715	DNAH9	-	0.610403067682936	0.696170634920635	-0.0857675672376987	-6.83308407329544	15.3545246682773	5.00634235082977e-06	0.000730611321753935	-0.112467413948697	-0.0590677205267	0.0125518091564085
chr17:12598336	AC068442.1	+	0.527848577627055	0.613827082364872	-0.085978504737817	-3.58165149026531	10.4078868764683	0.00469317784415247	0.0416148801575608	-0.13918280001158	-0.0327742094640542	0.0240052682321272
chr17:12598336	LINC00670	+	0.527848577627055	0.613827082364872	-0.085978504737817	-3.58165149026531	10.4078868764683	0.00469317784415247	0.0416148801575608	-0.13918280001158	-0.0327742094640542	0.0240052682321272
chr17:12750855	MYOCD	-	0.53283577458559	0.622342408549305	-0.0895066339637156	-4.32965006437484	11.6042160641324	0.0010571953279065	0.0168494934797332	-0.134720096812386	-0.0442931711150456	0.0206729487678907
chr17:12779923	AC005358.1	-	0.631045486771293	0.720368995346307	-0.0893235085750143	-5.16182251019161	7.82267352030467	0.000924589058500153	0.0155631401992976	-0.129386094491896	-0.049260922658133	0.0173046454810587
chr17:12872953	ARHGAP44	-	0.606981150561569	0.703085903629382	-0.096104753067813	-5.88100138519297	9.5940117297968	0.000182550229277604	0.00593002934954693	-0.132725963074103	-0.0594835430615226	0.0163415627327997
chr17:12886678	ARHGAP44	-	0.484858527869406	0.570967538910362	-0.0861090110409558	-7.30874833222979	17.3334958138293	1.08682249720841e-06	0.000309229963213583	-0.110929708449651	-0.0612883136322608	0.0117816358050305
chr17:12934179	ARHGAP44	-	0.633141863460307	0.716240132416603	-0.0830982689562964	-5.75643228198287	10.4295491975359	0.000156172838422877	0.00540863905965776	-0.115084402449591	-0.0511121354630021	0.0144357242273807
chr17:13908204	COX10-AS1	+	0.636333081263422	0.718550255550525	-0.082217174287103	-6.22054254418947	14.5006036120458	1.90867566166631e-05	0.00157930153672597	-0.110473372049608	-0.0539609765245979	0.0132170423565226
chr17:14891736	LINC02096	+	0.553505824584219	0.640323082398098	-0.0868172578138787	-5.17900964881619	6.8767880901809	0.00135485631257901	0.0195332994502613	-0.126600576084771	-0.0470339395429866	0.0167632933129837
chr17:14892976	LINC02096	+	0.663367464042473	0.792857142857143	-0.12948967881467	-6.16725630480479	15.7590324871995	1.44714720103837e-05	0.00134362857263778	-0.174055263954951	-0.0849240936743882	0.0209963186893639
chr17:14897021	LINC02096	-	0.650585695816788	0.78796992481203	-0.137384228995242	-5.24759039122661	17.2352691634233	6.26533534811079e-05	0.00316342121597779	-0.192562749923841	-0.082205708066643	0.0261804406885364
chr17:15337625	TEKT3	+	0.577906883483047	0.688013718307836	-0.110106834824789	-5.80265665265129	8.19682488718011	0.000368703771859412	0.00902497997817953	-0.153681612668724	-0.0665320569808537	0.0189752455497225
chr17:16288224	PIGL	-	0.350566762590204	0.265271765271765	0.0852949973184383	6.45027494305236	14.42478871176	1.31926195187659e-05	0.0012708770067064	0.0570116375435835	0.113578357093293	0.013223466917532
chr17:16288229	PIGL	-	0.349561448680009	0.251288187773171	0.0982732609068381	8.40547256622874	14.5186778321227	5.90224746951231e-07	0.000222292994607219	0.0732810982939939	0.123265423519682	0.0116915807091772
chr17:16958530	TNFRSF13B	+	0.564501193338232	0.666485543322125	-0.101984349983893	-8.49211873355706	13.3157534392281	9.7431998671814e-07	0.00029206214266264	-0.127866452123288	-0.0761022478444994	0.0120092939328435
chr17:17585943	PEMT	+	0.672124107796293	0.7570300445554	-0.084905936759107	-8.29706265111286	17.0551296976795	2.16196706148351e-07	0.000134056206276794	-0.10649089714463	-0.0633209763735841	0.0102332524568461
chr17:18713070	TRIM16L	-	0.528116306077674	0.61747491638796	-0.0893586103102861	-3.40907727601142	10.7723465553533	0.00600640077731077	0.0482736122975203	-0.147199854933988	-0.031517365686584	0.0262119638469547
chr17:19082332	AC007952.3	+	0.545236655472381	0.658471355971356	-0.113234700498975	-10.1410097199518	17.8113704750775	7.98549388278667e-09	2.6682172724034e-05	-0.136711455225377	-0.0897579457725729	0.0111660183380155
chr17:19816385	ULK2	-	0.590685745368648	0.678856377540588	-0.0881706321719398	-4.2998367926082	6.37711586627785	0.00442618369522687	0.0401572609647785	-0.137635424547557	-0.0387058397963223	0.0205055764729287
chr17:20669657	AC087499.5	-	0.665142940380667	0.798856114645588	-0.133713174264921	-6.62021065412791	15.8060813969443	6.26181921763019e-06	0.000833053361436798	-0.176573165039347	-0.0908531834904953	0.0201977219835968
chr17:20911478	CCDC144NL-AS1	+	0.601593480467797	0.696038199321466	-0.0944447188536696	-5.67465889449384	9.42093526388425	0.000256545211592571	0.00725676582947662	-0.131839470835563	-0.0570499668717766	0.0166432415779757
chr17:21153487	DHRS7B	+	0.424068778196526	0.342375314279339	0.0816934639171873	4.25636502228719	7.26846921935242	0.00345383351562444	0.0345532702819624	0.0366462707270022	0.126740657107372	0.0191932466998069
chr17:21622335	AC233702.1	-	0.58251068153347	0.402034077034077	0.180476604499393	4.72156478395185	8.63954511324121	0.00121523431602799	0.0182945953798842	0.0934550799354942	0.267498129063291	0.0382238966862883
chr17:2408893	METTL16	+	0.604271119643069	0.687356211040422	-0.0830850913973522	-7.92138844469055	13.4577179939219	1.989659068195e-06	0.000434394397419227	-0.105666463157086	-0.0605037196376186	0.0104887030824806
chr17:27029934	GTF2IP6	+	0.652820050386197	0.737432621578963	-0.0846125711927663	-5.14246267112456	15.6793744538688	0.000104716008230858	0.00429201210896733	-0.119550929362627	-0.0496742130229052	0.0164537064445551
chr17:27091868	AC129926.2	-	0.48518098712924	0.567141803179667	-0.0819608160504264	-4.65209796479816	13.2237558593569	0.000433110198785184	0.00991975445875502	-0.119956898707906	-0.0439647333929465	0.0176180331262612
chr17:30071510	EFCAB5	+	0.613726198181734	0.695681605975724	-0.08195540779399	-4.77532703651874	11.6738350806138	0.000488032575953888	0.0106606663012562	-0.119464965006093	-0.0444458505818868	0.0171622607555977
chr17:3094336	OR1D2	+	0.58772147392837	0.667755890188903	-0.0800344162605329	-4.3786449093235	13.8276543195187	0.000648186433182545	0.0126108531743022	-0.1192834742853	-0.0407853582357661	0.0182783527593468
chr17:3100785	OR1D2	+	0.552867812813874	0.652107735814632	-0.0992399230007587	-6.69875586455032	7.91917473555566	0.000160131319037275	0.00548942204182217	-0.133463422472424	-0.0650164235290933	0.0148146797714982
chr17:31612026	AC007923.4	+	0.635672185251889	0.73437947780053	-0.0987072925486417	-9.15717400673851	10.7797331821804	2.05380379753681e-06	0.000443339311109426	-0.122491500301147	-0.074923084796137	0.0107792308496055
chr17:32600912	MYO1D	-	0.583836222911853	0.708789249965721	-0.124953027053867	-6.99006550880187	17.563088673601	1.81614597850098e-06	0.000413665644783583	-0.162575772886594	-0.0873302812211409	0.017875802007367
chr17:32683508	AC025211.1	+	0.560340313895157	0.64802223919871	-0.0876819253035529	-4.98872265707956	9.96881318108313	0.000551518328243881	0.011443391001822	-0.126860367583741	-0.0485034830233652	0.0175760272379789
chr17:32683508	MYO1D	+	0.560340313895157	0.64802223919871	-0.0876819253035529	-4.98872265707956	9.96881318108313	0.000551518328243881	0.011443391001822	-0.126860367583741	-0.0485034830233652	0.0175760272379789
chr17:3290355	OR3A2	-	0.519622448452372	0.611079872044784	-0.0914574235924126	-3.78991257240641	8.01703390201826	0.00529172558102453	0.0447033578800925	-0.147084887232916	-0.0358299599519091	0.0241318030020786
chr17:3324173	OR3A2	-	0.661949635578314	0.76339834293661	-0.101448707358296	-9.80137629908059	17.6919207697972	1.42970777448283e-08	3.45497207344929e-05	-0.12322138145896	-0.0796760332576312	0.0103504553098132
chr17:33431878	ASIC2	+	0.654002987033084	0.748717506326202	-0.0947145192931184	-6.95478789351367	12.4716825754074	1.24650284654324e-05	0.0012293166123278	-0.124262925871438	-0.0651661127147991	0.0136186064540449
chr17:33996364	AC004147.4	-	0.597401078881161	0.72841303099301	-0.131011952111849	-8.5759700516535	13.7013396390747	7.0762558681869e-07	0.000244342835807933	-0.163844203997517	-0.098179700226182	0.0152766335846275
chr17:33996364	ASIC2	-	0.597401078881161	0.72841303099301	-0.131011952111849	-8.5759700516535	13.7013396390747	7.0762558681869e-07	0.000244342835807933	-0.163844203997517	-0.098179700226182	0.0152766335846275
chr17:33996364	AC024610.2	-	0.597401078881161	0.72841303099301	-0.131011952111849	-8.5759700516535	13.7013396390747	7.0762558681869e-07	0.000244342835807933	-0.163844203997517	-0.098179700226182	0.0152766335846275
chr17:34107948	AC004147.4	-	0.611673126253371	0.704148817025914	-0.0924756907725434	-8.69448005826344	16.0038359167919	1.8493753887584e-07	0.000122756488290826	-0.115022857114057	-0.0699285244310302	0.0106361381189957
chr17:34107948	ASIC2	-	0.611673126253371	0.704148817025914	-0.0924756907725434	-8.69448005826344	16.0038359167919	1.8493753887584e-07	0.000122756488290826	-0.115022857114057	-0.0699285244310302	0.0106361381189957
chr17:34480768	AC011193.1	-	0.629001496257957	0.712744621258386	-0.0837431250004288	-5.69336529434532	11.7463565696495	0.00010868752859556	0.0043827489708285	-0.115867979240759	-0.051618270760099	0.0147088972287801
chr17:34480843	AC011193.1	-	0.569337296218918	0.650130991975504	-0.0807936957565857	-4.8581417536282	12.4485931581444	0.000353664570630724	0.00879406932472376	-0.11688431690341	-0.0447030746097613	0.0166305760214277
chr17:35415443	SLFN12	+	0.509696972407476	0.629060245310245	-0.119363272902769	-3.38914173175631	11.9512095287977	0.00540566687716604	0.0452943065607562	-0.196134342215706	-0.0425922035898322	0.0352193216897167
chr17:37876926	YWHAEP7	+	0.612533086784647	0.692539013628525	-0.0800059268438783	-6.88214154211841	16.8353748778577	2.80082433335431e-06	0.000527891163752802	-0.104551131744068	-0.0554607219436881	0.0116251498685759
chr17:40044241	MED24	+	0.641715630916398	0.763968109929997	-0.122252479013599	-11.2397776960166	14.7122084416926	1.28923296535327e-08	3.23978852873795e-05	-0.145475326771549	-0.0990296312556492	0.0108767701924323
chr17:41583969	KRT14	-	0.633000087226646	0.716129375726899	-0.0831292885002527	-7.78983368957383	13.0661592091147	2.89480779416738e-06	0.000535012492885621	-0.106171823616663	-0.0600867533838428	0.0106715100492473
chr17:44683672	MEIOC	+	0.372044433818102	0.288290432971284	0.0837540008468179	8.76605192739391	15.336871438852	2.31031144907245e-07	0.000138006340845766	0.0634282580577918	0.104079743635844	0.00955435828358337
chr17:44683672	CCDC43	+	0.372044433818102	0.288290432971284	0.0837540008468179	8.76605192739391	15.336871438852	2.31031144907245e-07	0.000138006340845766	0.0634282580577918	0.104079743635844	0.00955435828358337
chr17:46278166	ARL17B	-	0.662194117857733	0.756306616213737	-0.0941124983560035	-6.2438054680536	11.2650564282064	5.68489626027768e-05	0.00299242726429419	-0.127192825165915	-0.0610321715460925	0.0150729389052125
chr17:47137191	CDC27	+	0.459530512356431	0.379134797091453	0.0803957152649776	3.88451166922193	10.1718961169122	0.00294118506799456	0.0312840367744111	0.0343865002432704	0.126404930286685	0.0206964792774277
[truncated: 3,348 more rows]
