# Supplementary material for: DNA Methylation Signature in Mononuclear Cells and Proinflammatory Cytokines May Define Molecular Subtypes in Sporadic Meniere Disease
Source: Preprints.org preprint supplement (doi:10.20944/preprints202110.0030.v1), 2021-10-01
Supplement: Supplementary file 10 [file Table_S3.xls]

## Sheet: Folha1
Position	Gene	Strand	mean MDH	mean Control	∆Mean	t-test	DF	p-value	padjust	CI_1	CI_2	SE
chr1:101381901	LINC01307	-	0.5791102	0.6612198	-0.08210961	-5.438236	10.69144	0.0002259367	0.00905228499344197	-0.1154587	-0.04876048	0.01509857
chr1:101383150	LINC01307	-	0.3975371	0.5960371	-0.1985	-5.49599	10.90525	0.0001932565	0.00843134353762211	-0.2780779	-0.1189222	0.03611725
chr1:101816368	OLFM3	+	0.5850537	0.6837586	-0.0987049	-4.497773	7.366544	0.00246957	0.0292686707997145	-0.1500784	-0.04733142	0.02194528
chr1:101901552	OLFM3	+	0.4713766	0.5533948	-0.08201823	-4.20136	10.76543	0.001553199	0.0229100018053262	-0.1251	-0.03893647	0.01952183
chr1:102210215	AC114485.1	-	0.5427784	0.6422829	-0.09950452	-6.624328	10.19127	5.388881e-05	0.00491809903970018	-0.1328886	-0.06612043	0.01502107
chr1:102225645	AC114485.1	+	0.4255462	0.5084428	-0.0828966	-3.718929	8.789205	0.004980837	0.0429111231407572	-0.133506	-0.03228714	0.02229045
chr1:102356561	AC114485.1	+	0.5844825	0.6705577	-0.08607519	-4.087726	10.79062	0.001868744	0.025259035186565	-0.1325313	-0.03961911	0.02105699
chr1:102795664	AC099567.1	+	0.6003666	0.6851282	-0.08476153	-4.612417	5.671106	0.004207442	0.0391008402909259	-0.1303677	-0.03915531	0.01837681
chr1:103059598	COL11A1	+	0.572021	0.6907383	-0.1187173	-5.397593	10.01483	0.0003009069	0.010336046538894	-0.1677142	-0.06972035	0.02199448
chr1:103471553	AC095032.1	-	0.5041437	0.6475681	-0.1434244	-9.048395	9.387178	6.12812e-06	0.00211911214053895	-0.1790573	-0.1077916	0.01585081
chr1:104160442	AC092506.1	+	0.5768487	0.662216	-0.08536724	-6.207549	9.955747	0.0001023935	0.00644420597328755	-0.1160274	-0.05470703	0.01375217
chr1:104207564	AC092506.1	+	0.56055	0.6603735	-0.09982345	-5.64123	7.947046	0.000498097	0.0130265969223742	-0.1406763	-0.05897056	0.01769533
chr1:104999089	AL591888.1	+	0.568854	0.669384	-0.10053	-8.448776	10.43088	5.51834e-06	0.0020259801487513	-0.1268944	-0.0741656	0.01189876
chr1:105010610	AL591888.1	+	0.5648962	0.658727	-0.09383077	-5.967951	10.85117	9.884069e-05	0.00634098172740455	-0.1284936	-0.05916791	0.01572244
chr1:105029412	AL591888.1	+	0.5093941	0.6008478	-0.09145369	-4.790605	10.96466	0.0005668438	0.0138350394248902	-0.1334875	-0.04941987	0.01909022
chr1:105950848	LINC01677	-	0.3892692	0.4755094	-0.08624017	-3.388793	10.70339	0.006278401	0.0488059168434997	-0.1424422	-0.03003812	0.02544864
chr1:105983794	AL355306.2	-	0.5511711	0.6603058	-0.1091347	-6.837606	8.984819	7.639986e-05	0.00568495362344195	-0.1452502	-0.07301921	0.01596095
chr1:105983794	LINC01677	-	0.5511711	0.6603058	-0.1091347	-6.837606	8.984819	7.639986e-05	0.00568495362344195	-0.1452502	-0.07301921	0.01596095
chr1:106042448	AL355306.2	-	0.5526033	0.7077021	-0.1550987	-8.213378	10.23831	8.051657e-06	0.00235650393496267	-0.1970418	-0.1131557	0.01888367
chr1:106069233	AL355306.2	+	0.57428	0.6546099	-0.08032982	-5.533007	8.571997	0.0004329656	0.0122071274384489	-0.1134242	-0.04723548	0.01451829
chr1:107171830	NTNG1	-	0.6339569	0.7856042	-0.1516473	-5.221738	8.808031	0.0005875487	0.0140645541395108	-0.2175627	-0.08573185	0.02904153
chr1:107202800	NTNG1	-	0.6015271	0.6845601	-0.08303305	-3.976104	8.830094	0.003349761	0.0345056874724096	-0.1304126	-0.03565345	0.02088302
chr1:107204267	NTNG1	-	0.6244854	0.7237242	-0.09923883	-7.882494	10.99878	7.522076e-06	0.00230085193741768	-0.1269491	-0.07152855	0.01258978
chr1:107204277	NTNG1	-	0.6171743	0.7080763	-0.09090196	-4.900722	9.770257	0.0006662179	0.0149501181593207	-0.1323631	-0.04944079	0.01854869
chr1:107735408	VAV3	+	0.6342691	0.7489991	-0.11473	-8.254321	9.790283	1.022216e-05	0.00256806943644128	-0.1457899	-0.08367006	0.01389938
chr1:107957770	VAV3	+	0.4693067	0.5635185	-0.09421187	-6.79431	9.901442	5.011445e-05	0.0047739674027193	-0.1251496	-0.06327411	0.01386629
chr1:108176845	SLC25A24	+	0.5841723	0.2810843	0.303088	4.608415	9.339968	0.001157048	0.0196987373146428	0.155131	0.451045	0.06576839
chr1:108179141	SLC25A24	+	0.6053076	0.6962952	-0.09098761	-3.646547	9.696428	0.004721847	0.0416372795746848	-0.1468203	-0.03515488	0.02495172
chr1:108182935	SLC25A24	+	0.6244354	0.3166226	0.3078129	4.680353	9.756199	0.0009266294	0.0176289533822642	0.1607769	0.4548488	0.06576701
chr1:109322393	SORT1	-	0.5567457	0.6448413	-0.08809559	-7.516151	7.76063	7.996917e-05	0.00579523991050929	-0.1152697	-0.06092149	0.01172084
chr1:110621427	KCNA2	+	0.5361175	0.6337046	-0.09758711	-9.878331	9.985357	1.798455e-06	0.0013042680307554	-0.1196031	-0.07557116	0.009878907
chr1:111303403	CHIA	-	0.6154622	0.7092147	-0.0937525	-6.943649	10.7228	2.786664e-05	0.00378020007885391	-0.123564	-0.06394101	0.01350191
chr1:111866350	KCND3	-	0.6341273	0.7323919	-0.09826464	-6.820883	10.01457	4.587416e-05	0.00461720300372985	-0.1303579	-0.06617142	0.01440644
chr1:112180931	AL445426.1	-	0.6058669	0.7117758	-0.1059089	-5.490645	10.97801	0.0001902359	0.00836994072181694	-0.148374	-0.06344378	0.01928897
chr1:112194329	AL445426.1	+	0.5598707	0.6498204	-0.08994967	-5.908726	10.35527	0.000129833	0.00708927562911089	-0.123712	-0.05618736	0.01522319
chr1:112222459	AL445426.1	+	0.7013993	0.6114303	0.08996899	6.27453	10.46149	7.552809e-05	0.00565587008247373	0.05821025	0.1217277	0.01433876
chr1:112306337	AL445426.1	+	0.6112211	0.7029785	-0.09175736	-4.927764	10.70455	0.0004890265	0.0129207404173999	-0.1328792	-0.05063551	0.01862049
chr1:113552002	MAGI3	-	0.5744465	0.6605005	-0.08605397	-5.611666	10.20457	0.0002079369	0.00871122450371008	-0.1201295	-0.05197845	0.01533483
chr1:113702667	PHTF1	+	0.4157994	0.3347003	0.08109906	5.050212	10.97256	0.0003748299	0.0114500733863636	0.04574365	0.1164545	0.01605855
chr1:113997771	OLFML3	+	0.604561	0.7279719	-0.123411	-5.536622	10.09206	0.0002406332	0.00931808771637491	-0.1730147	-0.07380722	0.02228994
chr1:114612166	DENND2C	+	0.5583416	0.6485616	-0.09022009	-5.231	9.72331	0.0004206369	0.0120526950410086	-0.128798	-0.05164219	0.0172472
chr1:114871278	SYCP1	-	0.6022891	0.6878992	-0.08561011	-4.568181	9.868288	0.001064869	0.0188810422095887	-0.1274423	-0.04377795	0.01874053
chr1:114884284	SYCP1	-	0.5863161	0.7017183	-0.1154023	-6.856606	10.35103	3.723137e-05	0.00425522477647392	-0.152732	-0.07807256	0.01683082
chr1:114908517	SYCP1	-	0.5584613	0.6501626	-0.09170131	-5.573276	7.799859	0.0005756108	0.0139376030911539	-0.1298139	-0.05358875	0.01645375
chr1:114920399	SYCP1	-	0.5457829	0.6768745	-0.1310916	-7.028838	9.47188	4.735339e-05	0.00467527764833497	-0.1729638	-0.0892194	0.01865054
chr1:115307347	NGF-AS1	+	0.497534	0.6047827	-0.1072487	-4.310485	9.188684	0.001868086	0.0252582960225335	-0.1633575	-0.05113992	0.0248809
chr1:115307347	NGF	+	0.497534	0.6047827	-0.1072487	-4.310485	9.188684	0.001868086	0.0252582960225335	-0.1633575	-0.05113992	0.0248809
chr1:115333531	NGF	-	0.3397022	0.421483	-0.08178081	-4.028042	10.6879	0.002106041	0.026876265798007	-0.1266269	-0.03693477	0.02030287
chr1:115333531	NGF-AS1	-	0.3397022	0.421483	-0.08178081	-4.028042	10.6879	0.002106041	0.026876265798007	-0.1266269	-0.03693477	0.02030287
chr1:116006607	SLC22A15	-	0.4778283	0.5634271	-0.08559874	-3.799228	10.90682	0.002991632	0.0324654390957046	-0.1352399	-0.03595757	0.02253056
chr1:116606713	IGSF3	+	0.3475257	0.2652116	0.08231404	3.446098	10.95227	0.005499336	0.0453862451270175	0.02971299	0.1349151	0.02388616
chr1:117977706	SPAG17	-	0.6375254	0.7599007	-0.1223753	-5.186586	10.97715	0.000302694	0.0103584617211445	-0.1743198	-0.0704308	0.02359458
chr1:117977840	SPAG17	-	0.6476882	0.7535937	-0.1059055	-6.760399	9.581084	6.125929e-05	0.00518305744594125	-0.1410186	-0.07079247	0.01566557
chr1:117977962	SPAG17	-	0.544876	0.6407602	-0.09588426	-4.414838	10.14089	0.001261249	0.020589606630465	-0.1441854	-0.0475831	0.02171864
chr1:118010946	SPAG17	+	0.5392214	0.6553995	-0.1161781	-7.220364	9.81618	3.153059e-05	0.00398493339479764	-0.1521208	-0.08023538	0.01609034
chr1:118104580	SPAG17	+	0.5432661	0.6297772	-0.08651112	-4.681425	9.552863	0.0009791778	0.0181149946752399	-0.1279491	-0.04507314	0.01847966
chr1:119177464	WARS2-AS1	+	0.4826007	0.3966901	0.0859106	3.873828	10.27086	0.002939987	0.0321612691448725	0.03667282	0.1351484	0.02217719
chr1:119672630	PHGDH	-	0.4869025	0.6248072	-0.1379048	-9.629404	7.405645	1.895328e-05	0.00325800188375152	-0.1713966	-0.1044129	0.01432121
chr1:120305596	AC244669.1	+	0.6379789	0.7359796	-0.0980007	-7.273142	10.84838	1.723225e-05	0.00311937712333333	-0.1277081	-0.06829326	0.01347433
chr1:120305596	AC244669.2	+	0.6379789	0.7359796	-0.0980007	-7.273142	10.84838	1.723225e-05	0.00311937712333333	-0.1277081	-0.06829326	0.01347433
chr1:12751337	C1orf158	+	0.5520352	0.6347214	-0.08268617	-5.961529	10.70721	0.000105345	0.00652301733773006	-0.1133159	-0.05205644	0.01386996
chr1:14041272	KAZN	-	0.5425546	0.6401949	-0.09764036	-6.092541	8.064678	0.0002825731	0.0100578558627629	-0.1345454	-0.06073537	0.01602621
chr1:143473097	AC239859.4	-	0.5295751	0.614249	-0.08467391	-5.078127	10.93782	0.0003623696	0.0112732859843047	-0.1213991	-0.04794868	0.01667424
chr1:14347788	KAZN-AS1	-	0.5404217	0.6239977	-0.08357603	-4.47758	10.28824	0.001103005	0.0192457885110408	-0.1250078	-0.04214422	0.01866545
chr1:14347788	KAZN	-	0.5404217	0.6239977	-0.08357603	-4.47758	10.28824	0.001103005	0.0192457885110408	-0.1250078	-0.04214422	0.01866545
chr1:143790858	LINC02591	+	0.5867547	0.6694444	-0.08268974	-3.847645	9.554676	0.003507441	0.0353845712441204	-0.1308789	-0.03450056	0.021491
chr1:14387101	KAZN-AS1	-	0.6343353	0.7486711	-0.1143357	-5.072444	7.111621	0.001375961	0.021511603860308	-0.1674666	-0.0612049	0.02254056
chr1:14387101	KAZN	-	0.6343353	0.7486711	-0.1143357	-5.072444	7.111621	0.001375961	0.021511603860308	-0.1674666	-0.0612049	0.02254056
chr1:14467559	KAZN	+	0.5614946	0.6432338	-0.0817392	-5.998218	7.866874	0.0003460663	0.0110324408177034	-0.1132565	-0.05022191	0.01362725
chr1:144872490	FP700111.1	-	0.5904909	0.6746405	-0.08414958	-6.859033	10.06161	4.276727e-05	0.00449257538494792	-0.1114627	-0.05683648	0.01226843
chr1:146129748	NBPF10	-	0.565123	0.6559506	-0.09082761	-3.879517	10.24651	0.002925336	0.0320749341044046	-0.1428234	-0.03883183	0.0234121
chr1:146156163	NOTCH2NLA	+	0.5598841	0.4588481	0.101036	4.292619	9.954634	0.001596204	0.0232402230380687	0.04855957	0.1535125	0.02353716
chr1:146156163	NBPF10	+	0.5598841	0.4588481	0.101036	4.292619	9.954634	0.001596204	0.0232402230380687	0.04855957	0.1535125	0.02353716
chr1:147332780	LINC00624	+	0.55902	0.6453014	-0.08628142	-3.511694	10.8571	0.004964245	0.0428431914651672	-0.140446	-0.03211681	0.02456974
chr1:147332815	LINC00624	+	0.6465487	0.7336045	-0.08705583	-7.031199	10.94445	2.237969e-05	0.00347931999777484	-0.1143239	-0.05978775	0.01238136
chr1:147467675	LINC00624	-	0.6140847	0.6947857	-0.08070094	-6.036882	10.53295	0.0001014447	0.00641194293125224	-0.1102836	-0.05111824	0.01336798
chr1:148490502	LINC01138	+	0.6341313	0.7352276	-0.1010963	-6.025232	10.9551	8.756759e-05	0.00601857076519074	-0.1380447	-0.06414788	0.01677882
chr1:148494487	LINC01138	-	0.5542566	0.6608027	-0.1065461	-4.168001	10.87545	0.001606591	0.0233259982363532	-0.1628884	-0.05020388	0.02556288
chr1:148812699	PDE4DIP	+	0.6442901	0.7437354	-0.09944534	-6.960124	10.86542	2.548417e-05	0.00365310160553977	-0.1309403	-0.06795036	0.01428787
chr1:148815314	PDE4DIP	-	0.5620133	0.6443883	-0.08237503	-3.42915	10.89681	0.005706448	0.0462979281899188	-0.1353082	-0.02944181	0.024022
chr1:148835395	PDE4DIP	+	0.6281323	0.4879023	0.14023	4.902079	10.54033	0.0005325538	0.0134585130242461	0.07693147	0.2035285	0.02860623
chr1:148851878	PDE4DIP	+	0.5584135	0.675594	-0.1171805	-7.35294	8.301407	6.589341e-05	0.00535367833797928	-0.1536993	-0.08066171	0.01593655
chr1:148869171	PDE4DIP	-	0.6340687	0.7345522	-0.1004835	-4.741824	10.93217	0.0006180659	0.0144138167941672	-0.1471597	-0.05380732	0.0211909
chr1:148875902	PDE4DIP	-	0.4504616	0.5879637	-0.1375021	-7.438874	7.908569	7.792327e-05	0.00573844099509129	-0.1802128	-0.09479136	0.01848426
chr1:148878137	PDE4DIP	+	0.5221022	0.4260504	0.09605175	5.678742	10.8263	0.0001514495	0.00756564394683939	0.0587507	0.1333528	0.01691427
chr1:148880544	PDE4DIP	-	0.561501	0.6848598	-0.1233588	-4.698128	10.71532	0.0006999857	0.0153163865324506	-0.181338	-0.06537965	0.02625702
chr1:148956181	PDE4DIP	+	0.4633	0.34272	0.1205799	8.456911	7.215563	5.364324e-05	0.00491159498646685	0.08706786	0.154092	0.01425815
chr1:149083104	NBPF9	-	0.6352347	0.7389761	-0.1037414	-5.446119	9.69585	0.0003146186	0.0105340875829656	-0.1463657	-0.06111715	0.01904869
chr1:152209693	FLG-AS1	-	0.8155768	0.6109694	0.2046074	5.431949	6.367268	0.001331654	0.0211730885599369	0.1137121	0.2955027	0.0376674
chr1:152239896	FLG-AS1	-	0.495363	0.6499569	-0.1545939	-4.775553	8.378828	0.00122979	0.0203126958826008	-0.2286603	-0.0805275	0.03237193
chr1:152285767	FLG-AS1	+	0.3267021	0.429191	-0.102489	-3.463659	10.72515	0.005495214	0.0453660216076234	-0.1678199	-0.03715806	0.02958979
chr1:152323234	FLG-AS1	+	0.5592933	0.6436881	-0.08439488	-7.670969	8.789164	3.527703e-05	0.00416924989273154	-0.1093741	-0.05941565	0.01100185
chr1:152323234	FLG	+	0.5592933	0.6436881	-0.08439488	-7.670969	8.789164	3.527703e-05	0.00416924989273154	-0.1093741	-0.05941565	0.01100185
chr1:152372388	FLG-AS1	+	0.5008012	0.5901333	-0.08933218	-4.308899	10.98751	0.001240623	0.0204038459528027	-0.1349694	-0.04369497	0.02073202
chr1:153601786	BX470102.2	+	0.631371	0.7137195	-0.08234849	-5.294937	7.7872	0.0008002969	0.0163790678992836	-0.1183835	-0.0463135	0.01555231
chr1:154032715	NUP210L	+	0.5872477	0.6972405	-0.1099928	-4.105373	10.97565	0.00175143	0.0244141820203078	-0.1689785	-0.05100717	0.02679241
chr1:154071244	NUP210L	-	0.6361865	0.7173178	-0.08113126	-9.901801	10.70665	1.014326e-06	0.00102542109886819	-0.09922568	-0.06303683	0.008193586
chr1:154737717	KCNN3	+	0.6146992	0.6987899	-0.08409071	-5.269122	10.8976	0.0002730424	0.00989915041219374	-0.1192569	-0.04892455	0.01595915
chr1:155475069	ASH1L	-	0.4519944	0.3162803	0.1357141	5.445189	10.84277	0.0002128277	0.0088075852023984	0.08076028	0.190668	0.02492368
chr1:156438609	C1orf61	+	0.6054052	0.5151651	0.0902401	3.768628	8.54915	0.004854828	0.0423081912756419	0.03563398	0.1448462	0.02394508
chr1:156929841	LRRC71	-	0.5983058	0.5165778	0.08172796	5.19201	9.636506	0.0004575315	0.012516000775441	0.04647444	0.1169815	0.0157411
chr1:157761065	FCRL2	+	0.5923592	0.691533	-0.09917373	-3.804812	8.318237	0.004838532	0.0422261493002375	-0.1588826	-0.03946487	0.02606534
chr1:157927800	AL139010.1	-	0.6114759	0.7087695	-0.09729364	-10.80233	8.152174	4.113454e-06	0.00178202033202271	-0.1179959	-0.07659138	0.009006725
chr1:158474070	OR10R2	-	0.3998485	0.4926221	-0.09277368	-3.824882	9.795378	0.003475035	0.035198732926003	-0.1469713	-0.03857606	0.02425531
chr1:158837079	MNDA	-	0.4439396	0.5700464	-0.1261068	-6.058273	10.71711	9.159966e-05	0.00611850871678341	-0.1720697	-0.08014391	0.02081563
chr1:159013941	IFI16	+	0.5819758	0.6972347	-0.1152588	-10.01281	10.24121	1.300607e-06	0.00113023869512931	-0.1408256	-0.08969206	0.01151114
chr1:159369731	AL513323.1	-	0.5116829	0.7003286	-0.1886457	-3.609756	10.37757	0.004495211	0.0405281758871668	-0.3045164	-0.07277497	0.05225995
chr1:159419924	AL513323.1	-	0.5756107	0.6923575	-0.1167467	-4.807236	7.553792	0.00157732	0.0230920184692628	-0.1733306	-0.0601629	0.02428563
chr1:159460477	AL513323.1	-	0.5821798	0.6706687	-0.08848888	-6.04354	8.94331	0.0001969819	0.00850760943851757	-0.1216432	-0.05533458	0.01464189
chr1:161771111	ATF6	-	0.5528009	0.4497394	0.1030615	6.80406	10.99649	2.942583e-05	0.00386489146687139	0.06972177	0.1364013	0.01514706
chr1:161790058	ATF6	-	0.7325272	0.6421396	0.09038759	16.01655	10.22237	1.42349e-08	0.000119173449911765	0.07785032	0.1029249	0.005643386
chr1:161999414	OLFML2B	+	0.5289752	0.4355832	0.09339198	3.66019	10.71287	0.003918204	0.0376156006576692	0.03704831	0.1497357	0.02551561
chr1:163119236	RGS5	+	0.5506224	0.6414347	-0.0908123	-4.675747	8.671741	0.001280952	0.0207567233595885	-0.1350027	-0.04662188	0.01942199
chr1:163125070	RGS5	+	0.6254053	0.7402456	-0.1148403	-8.293844	9.439665	1.233418e-05	0.00275793986452328	-0.1459422	-0.08373843	0.01384645
chr1:163209590	RGS5	-	0.5993525	0.6972574	-0.09790498	-7.682177	10.51291	1.252401e-05	0.00277207647313363	-0.1261147	-0.06969529	0.01274443
chr1:163209590	AL499616.1	-	0.5993525	0.6972574	-0.09790498	-7.682177	10.51291	1.252401e-05	0.00277207647313363	-0.1261147	-0.06969529	0.01274443
chr1:164830334	PBX1	+	0.5901532	0.6851719	-0.09501868	-3.88155	10.88386	0.002606971	0.0301390979353988	-0.1489681	-0.04106928	0.02447957
chr1:165321950	LMX1A	+	0.6295667	0.7687758	-0.1392091	-9.338998	9.497506	4.304804e-06	0.00182330154294118	-0.172662	-0.1057563	0.01490621
chr1:16564617	NBPF1	+	0.6212277	0.7096846	-0.08845691	-5.672586	8.82393	0.0003277576	0.010735609435826	-0.12384	-0.0530738	0.01559375
chr1:16564710	NBPF1	+	0.6338505	0.7223677	-0.0885172	-5.255443	10.60412	0.0003051873	0.0103928787430867	-0.1257579	-0.05127655	0.01684296
chr1:16565159	NBPF1	+	0.5306723	0.6486608	-0.1179885	-4.900095	8.690222	0.0009386126	0.0177512771568974	-0.172756	-0.063221	0.02407881
chr1:16568551	NBPF1	+	0.6254749	0.731116	-0.1056411	-5.161216	8.767753	0.0006455741	0.0147159864682129	-0.1521311	-0.05915102	0.02046825
chr1:16568573	NBPF1	+	0.6064945	0.687479	-0.08098447	-7.039668	10.44072	2.832928e-05	0.00381083072289604	-0.1064711	-0.05549783	0.01150402
chr1:166101390	FAM78B	+	0.4968008	0.5811466	-0.08434578	-4.030224	7.92406	0.003862277	0.037315266866956	-0.1326872	-0.03600438	0.02092831
chr1:166576830	FMO8P	+	0.5990712	0.7244341	-0.1253629	-4.169385	10.83314	0.001616282	0.0234036187529755	-0.1916655	-0.05906024	0.03006747
chr1:166668336	FMO10P	-	0.7476223	0.5505431	0.1970792	4.415237	6.695665	0.003451082	0.035066660624523	0.09055111	0.3036073	0.04463616
chr1:166959845	ILDR2	+	0.5969161	0.7099537	-0.1130376	-6.788745	10.39721	3.968054e-05	0.00434844420060531	-0.1499466	-0.0761287	0.01665074
chr1:166985999	MAEL	+	0.497345	0.5843192	-0.0869742	-3.74429	10.71469	0.003390694	0.0347371743933389	-0.1382664	-0.03568205	0.02322849
chr1:167097954	DUSP27	+	0.556112	0.7251213	-0.1690093	-8.494017	10.91393	3.879214e-06	0.00173119072493363	-0.2128455	-0.1251732	0.01989746
chr1:167097954	GPA33	+	0.556112	0.7251213	-0.1690093	-8.494017	10.91393	3.879214e-06	0.00173119072493363	-0.2128455	-0.1251732	0.01989746
chr1:167143473	GPA33	-	0.4177734	0.1693041	0.2484693	3.939379	9.207216	0.003260768	0.0340116236885827	0.1062758	0.3906629	0.06307323
chr1:168780643	AL135926.1	-	0.5015806	0.6329904	-0.1314098	-7.551925	10.08174	1.856025e-05	0.00323274519938302	-0.1701387	-0.0926809	0.01740084
chr1:169418769	CCDC181	-	0.5580928	0.6574821	-0.09938923	-4.262845	10.67345	0.00142982	0.0219525105834421	-0.1508979	-0.04788055	0.02331524
chr1:169538204	F5	+	0.5808663	0.6720976	-0.09123128	-4.435126	10.9997	0.001003137	0.0183360730725295	-0.1365061	-0.0459565	0.02057016
chr1:170604565	AL023495.1	-	0.4568384	0.5852614	-0.1284231	-4.524676	7.271788	0.002467826	0.0292576219276197	-0.1950326	-0.06181353	0.02838282
chr1:170780835	BX284613.2	+	0.6083958	0.6907545	-0.08235863	-7.256772	10.4559	2.150919e-05	0.00341926612201215	-0.1074976	-0.05721967	0.01134921
chr1:170790136	BX284613.2	+	0.6375411	0.7186229	-0.08108179	-4.251265	10.27127	0.00158792	0.023178569097284	-0.1234261	-0.03873749	0.01907239
chr1:170848955	BX284613.2	-	0.5369671	0.6537378	-0.1167707	-6.991878	10.8079	2.514228e-05	0.00362909711442013	-0.1536091	-0.07993241	0.01670091
chr1:170956382	MROH9	-	0.5913462	0.679915	-0.08856882	-5.110576	9.115579	0.0006111038	0.0143436227152408	-0.1276975	-0.04944016	0.0173305
chr1:170956382	BX284613.2	-	0.5913462	0.679915	-0.08856882	-5.110576	9.115579	0.0006111038	0.0143436227152408	-0.1276975	-0.04944016	0.0173305
chr1:171005653	BX284613.2	-	0.577009	0.6682487	-0.0912397	-6.64392	10.98915	3.658368e-05	0.00422590480920622	-0.1214691	-0.06101034	0.01373281
chr1:171005653	MROH9	-	0.577009	0.6682487	-0.0912397	-6.64392	10.98915	3.658368e-05	0.00422590480920622	-0.1214691	-0.06101034	0.01373281
chr1:171036830	BX284613.2	+	0.5616356	0.6513104	-0.08967481	-5.172873	9.318475	0.000523382	0.0133433289099646	-0.1286873	-0.05066234	0.01733559
chr1:171036830	MROH9	+	0.5616356	0.6513104	-0.08967481	-5.172873	9.318475	0.000523382	0.0133433289099646	-0.1286873	-0.05066234	0.01733559
chr1:171136787	BX284613.2	-	0.5623723	0.6587753	-0.09640297	-3.438933	10.99999	0.005535084	0.045544115817708	-0.1581028	-0.03470316	0.02803281
chr1:17192219	LINC02783	-	0.6342606	0.7201206	-0.08586001	-4.832472	8.991176	0.0009333062	0.0176978294322145	-0.1260585	-0.04566156	0.01776731
chr1:171944933	DNM3	-	0.6008573	0.6995058	-0.09864848	-4.724265	10.74949	0.0006656946	0.0149454584014571	-0.1447388	-0.05255818	0.02088124
chr1:172300388	DNM3	-	0.623379	0.7212853	-0.09790627	-8.485145	7.586737	3.913409e-05	0.004327117628125	-0.1247686	-0.07104392	0.01153855
chr1:172428194	C1orf105	-	0.5085714	0.4064785	0.1020929	6.948075	9.40348	5.38937e-05	0.00491809903970018	0.06906962	0.1351163	0.0146937
chr1:172428194	PIGC	-	0.5085714	0.4064785	0.1020929	6.948075	9.40348	5.38937e-05	0.00491809903970018	0.06906962	0.1351163	0.0146937
chr1:172786024	AL031599.1	-	0.5861073	0.6949484	-0.1088411	-7.751714	8.236896	4.666773e-05	0.00465184914668032	-0.1410581	-0.07662408	0.01404091
chr1:172899943	AL031599.1	-	0.3422281	0.5285045	-0.1862763	-4.745193	9.344942	0.0009475735	0.017836303766784	-0.2745819	-0.09797072	0.03925579
chr1:172900235	AL031599.1	-	0.4711861	0.3450409	0.1261452	5.650455	9.503948	0.0002564101	0.00959596610519756	0.07604827	0.176242	0.02232478
chr1:173751663	KLHL20	-	0.7088933	0.8184331	-0.1095398	-13.04286	10.02692	1.293421e-07	0.000439852393675355	-0.1282459	-0.09083368	0.008398447
chr1:173838521	DARS2	-	0.5896689	0.6973016	-0.1076327	-5.252538	10.49055	0.0003176272	0.0105749900217504	-0.153003	-0.06226243	0.02049157
chr1:173959366	RC3H1	+	0.7516031	0.6215604	0.1300426	4.109759	7.066126	0.004426949	0.0401963705656638	0.05536197	0.2047233	0.0316424
chr1:174153238	RABGAP1L-DT	+	0.5736998	0.6843634	-0.1106635	-4.832779	7.939721	0.001328158	0.0211444070595136	-0.1635375	-0.05778957	0.02289853
chr1:174238307	RABGAP1L	-	0.6292874	0.5341463	0.09514111	4.250372	8.081951	0.00273362	0.0309149442855998	0.04361406	0.1466682	0.02238418
chr1:175114051	TNN	-	0.5976218	0.6784537	-0.08083189	-5.430436	9.846374	0.0003047176	0.010389217503913	-0.1140679	-0.04759583	0.01488497
chr1:175345329	TNR	+	0.5770801	0.6694068	-0.09232672	-4.04881	10.67311	0.002039708	0.0264117349666043	-0.1427049	-0.04194855	0.02280342
chr1:176285273	AL591043.2	-	0.6461708	0.7348209	-0.08865011	-7.060341	5.73998	0.0004909288	0.01294337706576	-0.1197142	-0.05758598	0.01255607
chr1:176313335	AL591043.2	-	0.638666	0.7277673	-0.08910128	-3.916432	9.869224	0.002956365	0.0322543503374461	-0.139884	-0.03831853	0.02275063
chr1:176401153	AL591043.2	-	0.562101	0.679818	-0.117717	-5.003406	8.45528	0.000887882	0.0172731265653259	-0.1714669	-0.0639671	0.02352738
chr1:176637785	PAPPA2	-	0.555836	0.6523575	-0.09652148	-11.3041	10.86961	2.39562e-07	0.000589001156341463	-0.1153424	-0.07770055	0.008538626
chr1:176645779	PAPPA2	-	0.4697366	0.5661869	-0.09645026	-8.366597	10.91675	4.475382e-06	0.00185257785375953	-0.1218469	-0.07105364	0.01152801
chr1:176675825	PAPPA2	+	0.4908859	0.6170819	-0.126196	-5.571977	10.24944	0.0002164286	0.00887491836128545	-0.1764936	-0.07589832	0.02264833
chr1:176720448	PAPPA2	-	0.6129241	0.7035887	-0.09066457	-5.308373	10.69172	0.0002742398	0.00991597597148493	-0.128389	-0.05294009	0.01707954
chr1:176973291	ASTN1	-	0.4581679	0.5385394	-0.0803715	-3.515073	10.96126	0.004865579	0.0423605532099321	-0.1307183	-0.03002467	0.02286481
chr1:177008911	ASTN1	+	0.5571921	0.6563584	-0.09916627	-5.119483	10.5923	0.0003760675	0.0114694066000562	-0.1420012	-0.05633132	0.01937037
chr1:177154785	ASTN1	+	0.5836692	0.6962335	-0.1125642	-5.198177	9.238967	0.0005196672	0.0133034469392686	-0.1613578	-0.06377067	0.02165456
chr1:177462921	AL136114.1	+	0.6182937	0.7064192	-0.08812552	-8.077054	9.0354	2.002728e-05	0.00334064942136964	-0.1127923	-0.06345876	0.0109106
chr1:177544082	AL136114.1	-	0.5424999	0.6468806	-0.1043807	-5.736113	10.01847	0.0001873986	0.00831997118160941	-0.1449163	-0.06384513	0.01819711
chr1:177661395	AL136114.1	+	0.531597	0.6129926	-0.08139558	-6.3395	10.98798	5.55229e-05	0.00498395897996438	-0.1096588	-0.05313241	0.01283943
chr1:177684686	AL136114.1	-	0.5968698	0.6782965	-0.08142668	-4.444168	10.97535	0.0009935705	0.0182503338010204	-0.1217645	-0.04108886	0.01832214
chr1:177827989	AL136114.1	-	0.5571107	0.676312	-0.1192013	-5.414323	10.99732	0.0002121763	0.00879613556491981	-0.1676595	-0.07074316	0.02201592
chr1:178013644	CRYZL2P	-	0.5916531	0.6776566	-0.08600349	-4.542659	7.245823	0.002436	0.0290420143410093	-0.1304655	-0.04154151	0.01893241
chr1:178013644	CRYZL2P-SEC16B	-	0.5916531	0.6776566	-0.08600349	-4.542659	7.245823	0.002436	0.0290420143410093	-0.1304655	-0.04154151	0.01893241
chr1:178116238	RASAL2	-	0.6280127	0.7265251	-0.0985124	-5.136812	5.584043	0.002651321	0.0303982082326515	-0.1462991	-0.05072568	0.01917773
chr1:178249234	RASAL2	-	0.595542	0.6909786	-0.09543662	-6.201392	8.864223	0.0001690818	0.00794649920727406	-0.1303317	-0.06054159	0.01538955
chr1:178322821	RASAL2	-	0.4924496	0.5900583	-0.09760864	-5.048914	7.915543	0.001023029	0.0185269345221352	-0.1422726	-0.05294464	0.0193326
chr1:178414839	RASAL2	-	0.6395282	0.7286237	-0.08909548	-6.108738	9.794411	0.0001247783	0.0069648936772242	-0.1216854	-0.05650554	0.01458492
chr1:178518451	TEX35	+	0.528444	0.6704261	-0.141982	-5.964608	9.927634	0.0001426375	0.00738976655238235	-0.1950733	-0.08889077	0.02380408
chr1:178838857	RALGPS2	+	0.6420418	0.7446351	-0.1025933	-4.814389	10.54013	0.000610148	0.0143375331839222	-0.1497465	-0.05544	0.02130972
chr1:179471926	AXDND1	-	0.5753839	0.6774961	-0.1021122	-6.320139	10.88005	5.962029e-05	0.00513238542566183	-0.1377206	-0.06650378	0.01615664
chr1:179570757	NPHS2	-	0.6323693	0.7423356	-0.1099663	-7.398647	9.882178	2.475039e-05	0.00360639938865607	-0.1431368	-0.07679581	0.01486303
chr1:179655371	TDRD5	-	0.600723	0.7017983	-0.1010753	-4.094816	8.690995	0.002904222	0.0319338487218344	-0.1572179	-0.04493273	0.02468373
chr1:179660345	TDRD5	-	0.6119732	0.6980558	-0.0860826	-4.38998	10.79034	0.001131476	0.0194881268095389	-0.129344	-0.04282121	0.01960888
chr1:179674822	TDRD5	-	0.5858775	0.6904762	-0.1045987	-5.002913	10.49949	0.0004614933	0.0125701512232429	-0.150885	-0.05831242	0.02090756
chr1:179677032	TDRD5	-	0.5580455	0.7274934	-0.1694479	-7.466812	10.05047	2.083684e-05	0.0033844929747182	-0.2199777	-0.1189181	0.02269347
chr1:182464521	RGSL1	+	0.5368707	0.6484568	-0.111586	-4.313281	7.382359	0.003099491	0.0330870566994191	-0.1721232	-0.05104888	0.02587034
chr1:182506327	RGSL1	-	0.6432237	0.7630544	-0.1198308	-4.656305	6.423893	0.002913398	0.0319918393671024	-0.1818088	-0.05785276	0.02573516
chr1:183494137	SMG7	-	0.5445677	0.7127484	-0.1681806	-4.23124	10.55978	0.001542319	0.0228349615519303	-0.256111	-0.08025025	0.03974737
chr1:18357131	IGSF21	+	0.5770296	0.6655702	-0.0885406	-4.216228	10.11579	0.001737508	0.0243180341802027	-0.1352589	-0.04182228	0.02099996
chr1:18359674	IGSF21	+	0.6493997	0.471488	0.1779117	5.39907	10.85839	0.0002269471	0.0090690200042752	0.1052686	0.2505547	0.03295229
chr1:183661613	RGL1	-	0.5157474	0.5986472	-0.08289978	-4.119196	8.11823	0.003243972	0.0339245673541312	-0.1291913	-0.03660829	0.02012523
chr1:183768340	RGL1	-	0.633403	0.7194797	-0.08607667	-7.230105	9.468199	3.773978e-05	0.00427024876972271	-0.1128067	-0.05934662	0.01190531
chr1:184130317	AL158011.2	-	0.7737888	0.6406145	0.1331743	3.992905	6.471952	0.006147857	0.0482299918195715	0.05298421	0.2133643	0.03335273
chr1:185259206	SWT1	-	0.5898614	0.6705827	-0.08072126	-4.544916	10.99666	0.0008377301	0.0167521016328601	-0.1198139	-0.04162859	0.01776078
chr1:185983048	HMCN1	-	0.5713701	0.6788699	-0.1074998	-6.854862	10.89886	2.878045e-05	0.00383326690740846	-0.1420554	-0.07294423	0.01568227
chr1:186035905	HMCN1	-	0.6161055	0.6982615	-0.08215602	-6.021041	10.24991	0.0001160462	0.00675882344776797	-0.1124584	-0.05185364	0.01364482
chr1:186073170	HMCN1	+	0.5126539	0.8095765	-0.2969227	-6.186945	9.741034	0.0001154445	0.0067452676230024	-0.4042417	-0.1896037	0.04799181
chr1:186126625	HMCN1	+	0.6188562	0.7320599	-0.1132037	-8.78418	10.46765	3.757358e-06	0.00170377065355584	-0.1417453	-0.08466211	0.01288722
chr1:186855493	PLA2G4A	-	0.5562301	0.6405287	-0.08429862	-5.005933	10.88451	0.0004117729	0.0119297655728157	-0.1214107	-0.04718656	0.01683974
chr1:186883812	PLA2G4A	+	0.6263981	0.7086987	-0.08230063	-6.077923	9.887417	0.0001248708	0.00696767412288471	-0.1125183	-0.05208296	0.01354091
chr1:187083969	ERVMER61-1	-	0.545177	0.6640821	-0.1189051	-4.142624	10.8844	0.001673618	0.023849656429711	-0.1821615	-0.05564859	0.02870284
chr1:187085408	ERVMER61-1	-	0.4724775	0.5939574	-0.1214799	-4.685352	9.984847	0.0008640156	0.0170367917350015	-0.1792621	-0.06369776	0.0259276
chr1:187361270	ERVMER61-1	-	0.5263296	0.6246601	-0.09833044	-4.862536	10.49765	0.0005728101	0.0139083130237768	-0.1431001	-0.05356077	0.02022205
chr1:187381103	ERVMER61-1	-	0.6178337	0.7075112	-0.08967746	-4.241677	10.10874	0.001671009	0.0238312469322729	-0.1367161	-0.04263878	0.02114198
chr1:187398461	ERVMER61-1	+	0.5772906	0.6792065	-0.1019159	-4.613964	10.14752	0.000923269	0.0176007272947454	-0.1510355	-0.05279629	0.02208857
chr1:187493685	ERVMER61-1	-	0.584275	0.7129312	-0.1286562	-7.888426	10.97142	7.584035e-06	0.00230770182717766	-0.1645645	-0.09274784	0.01630949
chr1:187645152	ERVMER61-1	-	0.586871	0.6696416	-0.08277065	-5.281735	10.36992	0.0003160921	0.0105502779054252	-0.11752	-0.04802135	0.01567111
chr1:188907017	LINC01035	-	0.4866773	0.6033933	-0.116716	-7.284659	6.860506	0.0001817403	0.00819660943637351	-0.1547592	-0.07867291	0.01602217
chr1:188909880	LINC01035	-	0.6474411	0.7343387	-0.08689763	-5.49905	10.55597	0.0002161339	0.00886901863959642	-0.1218576	-0.05193767	0.0158023
chr1:188916530	LINC01035	+	0.6121482	0.6976465	-0.08549831	-7.258262	10.6752	1.917428e-05	0.00327266040366296	-0.1115213	-0.05947536	0.01177945
chr1:188916567	LINC01035	+	0.5142857	0.6009252	-0.0866395	-3.595129	10.97311	0.004221723	0.0391643288428823	-0.1396972	-0.0335818	0.02409914
chr1:188992621	LINC01035	+	0.51443	0.6316407	-0.1172107	-4.154199	10.38371	0.001814479	0.0248570131271234	-0.1797641	-0.05465724	0.02821499
chr1:190102761	BRINP3	+	0.5458619	0.6291229	-0.08326099	-4.249284	7.981502	0.002816668	0.0314160993310677	-0.1284634	-0.03805862	0.01959412
chr1:190134300	BRINP3	+	0.6361144	0.7176858	-0.08157144	-3.800833	10.31029	0.003296026	0.0342002986031909	-0.1291962	-0.03394667	0.02146146
chr1:190141705	BRINP3	-	0.5512628	0.6639384	-0.1126756	-5.70029	9.035276	0.0002899472	0.0101846850681117	-0.1573642	-0.06798694	0.01976664
chr1:190181777	BRINP3	-	0.5025533	0.6014781	-0.09892473	-3.629182	10.51624	0.004257734	0.0393261500371049	-0.1592579	-0.03859154	0.02725814
chr1:190223737	BRINP3	+	0.5633999	0.7331779	-0.169778	-6.405412	7.54881	0.0002663323	0.00978814712504557	-0.2315413	-0.1080147	0.0265054
chr1:190224376	BRINP3	+	0.5352398	0.6430118	-0.107772	-7.365578	10.37234	1.970296e-05	0.0033156972838379	-0.1402158	-0.07532814	0.01463184
chr1:190232593	BRINP3	+	0.6310513	0.8260018	-0.1949505	-5.693583	7.369013	0.0006161947	0.0143938210783402	-0.2751015	-0.1147996	0.0342404
chr1:190258484	BRINP3	+	0.468636	0.6325609	-0.163925	-5.204687	10.99902	0.0002924349	0.0102219520646671	-0.2332472	-0.09460277	0.03149565
chr1:190269170	BRINP3	+	0.414621	0.5183484	-0.1037273	-5.574601	9.796764	0.0002541512	0.00956265234147382	-0.1453035	-0.06215119	0.01860713
chr1:190269170	AL354771.1	+	0.414621	0.5183484	-0.1037273	-5.574601	9.796764	0.0002541512	0.00956265234147382	-0.1453035	-0.06215119	0.01860713
chr1:190354667	BRINP3	-	0.4484057	0.5778793	-0.1294736	-5.717579	10.6747	0.0001510138	0.00755698004258563	-0.1795005	-0.07944674	0.02264483
chr1:190354667	AL354771.1	-	0.4484057	0.5778793	-0.1294736	-5.717579	10.6747	0.0001510138	0.00755698004258563	-0.1795005	-0.07944674	0.02264483
chr1:190379929	BRINP3	+	0.6185445	0.6991667	-0.0806222	-4.03131	10.21574	0.002293487	0.0281327521337308	-0.1250555	-0.03618886	0.01999901
chr1:190410524	BRINP3	+	0.5325898	0.6408562	-0.1082664	-8.99158	6.63772	5.900018e-05	0.00510829349868712	-0.1370567	-0.07947625	0.01204087
chr1:190703917	LINC01720	+	0.5825169	0.6798236	-0.09730673	-6.039643	10.99627	8.445017e-05	0.00593181322993729	-0.132769	-0.06184445	0.01611134
chr1:190723630	LINC01720	-	0.5541667	0.6556255	-0.1014588	-4.311109	8.449158	0.002268632	0.0279708767539706	-0.1552309	-0.04768678	0.02353428
chr1:190742557	LINC01720	+	0.5088614	0.6512562	-0.1423947	-6.341578	10.00268	8.432828e-05	0.00592955755114994	-0.1924239	-0.09236559	0.02245415
chr1:191030082	AL138927.1	+	0.550955	0.6549904	-0.1040354	-6.630196	9.606904	7.072083e-05	0.00550320830139502	-0.1391924	-0.06887846	0.01569115
chr1:191123593	AL138927.1	-	0.5934412	0.6941274	-0.1006861	-7.354577	10.47868	1.887029e-05	0.00325007007179644	-0.1310021	-0.07037014	0.01369027
chr1:191861759	AL359081.1	+	0.5995262	0.6949619	-0.09543571	-7.650388	10.26013	1.498099e-05	0.00296026627797536	-0.1231357	-0.06773574	0.01247462
chr1:191861759	LINC02770	+	0.5995262	0.6949619	-0.09543571	-7.650388	10.26013	1.498099e-05	0.00296026627797536	-0.1231357	-0.06773574	0.01247462
chr1:191889627	AL359081.1	-	0.6273126	0.7150059	-0.08769329	-4.023204	10.49494	0.002201823	0.0275329323516746	-0.1359511	-0.0394355	0.02179688
chr1:191889627	LINC02770	-	0.6273126	0.7150059	-0.08769329	-4.023204	10.49494	0.002201823	0.0275329323516746	-0.1359511	-0.0394355	0.02179688
chr1:191892246	LINC02770	+	0.255541	0.3524786	-0.0969376	-4.839535	9.113042	0.0008893451	0.0172856610037736	-0.1421639	-0.05171133	0.02003035
chr1:191989655	LINC02770	+	0.5765669	0.674747	-0.09818005	-5.033087	10.92599	0.0003900893	0.0116399130245898	-0.14115	-0.05521008	0.01950693
chr1:192008575	LINC02770	+	0.5356755	0.6210879	-0.0854124	-5.353215	10.97664	0.0002343647	0.00920801420292316	-0.120539	-0.0502858	0.01595535
chr1:192323656	AL390957.1	+	0.5803772	0.6728542	-0.09247696	-7.094493	6.790326	0.000224302	0.0090191845897487	-0.1234939	-0.06146001	0.01303503
chr1:192323656	RGS21	+	0.5803772	0.6728542	-0.09247696	-7.094493	6.790326	0.000224302	0.0090191845897487	-0.1234939	-0.06146001	0.01303503
chr1:192423059	AL390957.1	+	0.5971489	0.6959136	-0.09876467	-5.48295	9.967005	0.0002712865	0.00986985309888637	-0.1389183	-0.05861107	0.01801305
chr1:192428491	AL390957.1	+	0.6158974	0.7023754	-0.08647801	-6.878194	10.93398	2.745977e-05	0.00375457295145321	-0.1141709	-0.05878511	0.01257278
chr1:192946019	AL390957.1	-	0.6463585	0.737037	-0.09067849	-5.928468	10.98985	9.932479e-05	0.00635197931067156	-0.1243473	-0.05700968	0.01529543
chr1:1933776	CFAP74	-	0.640197104482819	0.724872328764317	-0.0846752242814979	-5.17419946846072	10.9745501498459	0.000308794213876959	0.0104509721541007	-0.12070430593743	-0.0486461426255659	0.0163648936995249
chr1:193872307	AL136456.1	+	0.5276532	0.2573609	0.2702923	5.954851	8.917581	0.000222021	0.00897439826940482	0.1674675	0.3731171	0.04539028
chr1:193977155	AL136456.1	-	0.5831333	0.6982415	-0.1151083	-4.553542	10.02616	0.001045531	0.018726381886565	-0.1714131	-0.05880341	0.02527884
chr1:194140783	AL136456.1	+	0.612451	0.7005862	-0.08813514	-4.4541	9.798111	0.001290371	0.0208411943643709	-0.1323477	-0.04392258	0.01978742
chr1:194163020	AL136456.1	+	0.5729888	0.6625748	-0.08958603	-6.030859	10.99467	8.557046e-05	0.00597009210422187	-0.1222827	-0.05688933	0.01485461
chr1:194171430	AL136456.1	-	0.5939229	0.6780744	-0.08415152	-6.77008	10.87536	3.253153e-05	0.00403208832873069	-0.1115479	-0.05675515	0.01242992
chr1:194884801	AL353072.2	+	0.5915522	0.7126758	-0.1211236	-11.27934	6.736516	1.277753e-05	0.00279423809062887	-0.1467189	-0.09552828	0.01073853
chr1:196053908	LINC01724	-	0.5045078	0.6071296	-0.1026218	-7.578694	10.56865	1.373021e-05	0.00286544352603489	-0.132574	-0.07266956	0.01354083
chr1:196054816	LINC01724	-	0.4485146	0.533232	-0.0847174	-4.135687	7.816978	0.003441067	0.0350105507007742	-0.1321479	-0.0372869	0.02048448
chr1:196322180	KCNT2	+	0.6017492	0.6840729	-0.08232367	-5.618886	9.281365	0.0002916403	0.0102109557949042	-0.1153146	-0.04933278	0.01465124
chr1:196656749	CFH	-	0.4898438	0.6053748	-0.115531	-4.277173	10.69354	0.001390605	0.0216334166030997	-0.1751905	-0.05587151	0.02701106
chr1:196662999	CFH	-	0.653237	0.7538612	-0.1006243	-6.838152	10.97537	2.839884e-05	0.00381143494231135	-0.1330209	-0.06822763	0.01471513
chr1:196712587	CFH	-	0.557097	0.6444932	-0.08739611	-4.430113	8.253665	0.002035157	0.0263834581340596	-0.1326461	-0.04214609	0.01972774
chr1:196901333	CFHR4	+	0.5623299	0.6584051	-0.09607519	-5.019163	10.63656	0.0004327288	0.0122057790237039	-0.138382	-0.05376835	0.01914167
chr1:196989206	CFHR5	-	0.6288214	0.7145126	-0.08569122	-5.060506	9.181076	0.0006400683	0.0146531679223469	-0.1238822	-0.04750022	0.01693333
chr1:197288724	CRB1	+	0.8388453	0.6076243	0.231221	4.075717	10.6288	0.001966699	0.0259204354965446	0.105822	0.35662	0.05673136
chr1:197365797	CRB1	-	0.5879739	0.6879365	-0.09996258	-5.711961	6.310731	0.001046735	0.0187371511112379	-0.142279	-0.05764617	0.01750057
chr1:197433641	CRB1	+	0.5729099	0.6882761	-0.1153662	-6.547359	6.562302	0.0004197479	0.0120408012411201	-0.1576015	-0.07313085	0.01762027
chr1:198314395	NEK7	-	0.6555424	0.5390128	0.1165295	4.472748	7.454935	0.002473519	0.0292933977102914	0.05567742	0.1773817	0.02605324
chr1:198646550	PTPRC	-	0.5506112	0.6358587	-0.08524752	-3.927921	10.64492	0.002511657	0.0295318741197201	-0.1332106	-0.0372845	0.02170297
chr1:198978679	AC096631.1	-	0.5656485	0.6714248	-0.1057763	-4.23646	10.06883	0.001699868	0.0240512984476259	-0.1613572	-0.05019544	0.02496809
chr1:199250176	LINC02789	+	0.6333686	0.742272	-0.1089034	-4.687569	6.189155	0.003105565	0.0331182967640169	-0.1653325	-0.0524743	0.02323238
chr1:199340060	LINC02789	+	0.5844055	0.6867674	-0.1023618	-12.17934	10.93013	1.064391e-07	0.000401642536516043	-0.1208745	-0.08384911	0.008404545
chr1:200276546	LINC00862	-	0.6708031	0.7563551	-0.08555202	-13.73842	6.167957	7.405685e-06	0.00229399057724978	-0.1006894	-0.0704146	0.006227211
chr1:20049001	PLA2G5	+	0.532717	0.6327055	-0.09998852	-3.896287	9.839714	0.003071273	0.0329178079066482	-0.1572947	-0.04268237	0.02566251
chr1:200597339	KIF14	+	0.6128013	0.7538051	-0.1410038	-3.62398	10.99871	0.003999272	0.0380368004329308	-0.2266422	-0.05536545	0.03890856
chr1:200758989	CAMSAP2	-	0.6114244	0.6946621	-0.08323772	-4.90933	6.376997	0.002262013	0.0279253217966864	-0.1241378	-0.04233766	0.016955
chr1:202375358	PPP1R12B	-	0.4192712	0.5044904	-0.08521924	-4.070624	7.810999	0.0037652	0.0368092783496585	-0.1336999	-0.03673854	0.02093518
chr1:202771301	KDM5B	-	0.5158476	0.7998074	-0.2839598	-5.359099	6.439038	0.001380983	0.0215471517789939	-0.4115	-0.1564196	0.05298648
chr1:20373300	LINC01141	+	0.4278085	0.3046919	0.1231166	5.71298	6.370974	0.001011645	0.0184120467697049	0.07112027	0.1751129	0.02155033
chr1:203769552	LAX1	+	0.4737739	0.3774876	0.09628626	3.537051	10.58192	0.004937308	0.0427063010159477	0.03608056	0.156492	0.02722218
chr1:20423118	LINC01141	+	0.5430687	0.6312582	-0.0881895	-6.689982	10.98299	3.447881e-05	0.00413627572214856	-0.1172091	-0.05916992	0.01318232
chr1:204914098	NFASC	+	0.5559483	0.644363	-0.0884147	-3.719673	10.77598	0.003502861	0.03535994416886	-0.140864	-0.03596543	0.02376948
chr1:204959305	NFASC	-	0.4551889	0.56491	-0.1097211	-8.447818	10.89293	4.140447e-06	0.00178693842131193	-0.138342	-0.08110017	0.0129881
chr1:206089557	RHEX	+	0.4490066	0.3678538	0.08115281	3.636934	10.16622	0.004438921	0.0402598683800337	0.03154515	0.1307605	0.02231352
chr1:206914091	FCMR	-	0.3547728	0.565	-0.2102272	-6.327685	10.98607	5.648615e-05	0.00501744769074144	-0.2833628	-0.1370917	0.0332234
chr1:207276431	AL596218.1	-	0.613617	0.7080119	-0.09439492	-4.456467	10.9896	0.0009705275	0.0180291739492563	-0.1410206	-0.04776924	0.02118156
chr1:207480732	CR2	-	0.5279589	0.6311323	-0.1031734	-4.87893	10.82924	0.000510335	0.0131873873981068	-0.1498067	-0.05654007	0.02114672
chr1:207515685	CR1	-	0.6233726	0.7532887	-0.1299162	-7.243755	10.93387	1.712969e-05	0.00310967553464111	-0.1694198	-0.09041252	0.01793492
chr1:207615419	CR1	+	0.4980058	0.6083505	-0.1103446	-4.110139	10.98525	0.001734195	0.0242958422940616	-0.169444	-0.05124525	0.02684693
chr1:20822254	EIF4G3	-	0.6467644	0.730424	-0.0836596	-5.659129	10.99913	0.0001468562	0.00746591316188761	-0.1161973	-0.05112185	0.01478312
chr1:20822307	EIF4G3	-	0.5926303	0.6812802	-0.08864991	-3.531427	10.89105	0.004773706	0.041903467392862	-0.1439691	-0.03333076	0.02510314
chr1:208730416	LINC01717	+	0.5473064	0.667914	-0.1206076	-9.950973	8.226351	7.212487e-06	0.00227806006340625	-0.1484235	-0.0927917	0.01212018
chr1:209955285	SYT14	-	0.5962298	0.6992903	-0.1030605	-4.855431	10.32259	0.0006078301	0.014306404233131	-0.1501549	-0.05596597	0.02122581
chr1:209987947	AL022397.1	-	0.4005501	0.5736413	-0.1730912	-6.220612	10.16692	9.193895e-05	0.00612628803138865	-0.2349524	-0.11123	0.02782543
chr1:209987947	SYT14	-	0.4005501	0.5736413	-0.1730912	-6.220612	10.16692	9.193895e-05	0.00612628803138865	-0.2349524	-0.11123	0.02782543
chr1:21028212	EIF4G3	+	0.5927307	0.6918354	-0.09910464	-4.525453	10.40346	0.0009945438	0.0182604317837479	-0.1476442	-0.05056506	0.02189939
chr1:210847974	KCNH1	+	0.5284666	0.608569	-0.0801024	-4.677012	10.6486	0.0007361469	0.0157137979181868	-0.1179506	-0.04225417	0.01712683
chr1:210888438	KCNH1	+	0.5010643	0.6000042	-0.09893982	-3.95211	10.17553	0.002630679	0.0302760042655022	-0.1545904	-0.04328922	0.02503469
chr1:210888438	AL590132.1	+	0.5010643	0.6000042	-0.09893982	-3.95211	10.17553	0.002630679	0.0302760042655022	-0.1545904	-0.04328922	0.02503469
chr1:210985120	AL590132.1	-	0.7399059	0.889139	-0.1492331	-7.15732	10.01117	3.059873e-05	0.00393216806475141	-0.1956837	-0.1027825	0.02085041
chr1:210985120	KCNH1	-	0.7399059	0.889139	-0.1492331	-7.15732	10.01117	3.059873e-05	0.00393216806475141	-0.1956837	-0.1027825	0.02085041
chr1:211005031	AL590132.1	+	0.5973185	0.7683404	-0.1710219	-5.36235	6.73901	0.001188321	0.0199426131404585	-0.2470332	-0.0950106	0.03189309
chr1:211005031	KCNH1	+	0.5973185	0.7683404	-0.1710219	-5.36235	6.73901	0.001188321	0.0199426131404585	-0.2470332	-0.0950106	0.03189309
chr1:211057433	KCNH1	+	0.5031672	0.6277471	-0.1245799	-5.73801	10.93322	0.0001337529	0.00717717497110706	-0.1724019	-0.07675793	0.02171134
chr1:211057433	AL590132.1	+	0.5031672	0.6277471	-0.1245799	-5.73801	10.93322	0.0001337529	0.00717717497110706	-0.1724019	-0.07675793	0.02171134
chr1:211140693	AC092017.3	-	0.6011598	0.6908551	-0.08969535	-7.227035	10.42204	2.269966e-05	0.00348701039834567	-0.1171979	-0.06219277	0.01241109
chr1:211140693	AC092017.4	-	0.6011598	0.6908551	-0.08969535	-7.227035	10.42204	2.269966e-05	0.00348701039834567	-0.1171979	-0.06219277	0.01241109
chr1:211388160	LINC00467	+	0.6335986	0.8317571	-0.1981584	-4.522811	6.853975	0.002871439	0.0317474829802419	-0.3022091	-0.09410775	0.04381311
chr1:211849269	LPGAT1-AS1	-	0.6470711	0.7485285	-0.1014574	-6.1176	10.75904	8.293191e-05	0.00588196384690421	-0.1380596	-0.06485512	0.0165845
chr1:212052873	DTL	-	0.6182113	0.7249686	-0.1067573	-6.335489	10.50164	6.841959e-05	0.005431358090432	-0.1440612	-0.06945333	0.01685068
chr1:213496499	AL592402.1	+	0.5536333	0.6495212	-0.09588797	-4.420947	6.648568	0.003487185	0.0352685719976065	-0.1477301	-0.04404583	0.02168946
chr1:213503241	AL592402.1	-	0.500151	0.6034026	-0.1032516	-5.760337	10.99988	0.0001264401	0.00700824356110587	-0.1427034	-0.06379984	0.01792458
chr1:214100618	LINC02775	+	0.5827885	0.6766545	-0.09386596	-4.222181	8.958604	0.002255373	0.0278844698070959	-0.1441928	-0.04353908	0.02223163
chr1:214144023	LINC02775	+	0.6638693	0.7623758	-0.09850647	-5.488177	10.99312	0.000190008	0.00836773981651376	-0.1380146	-0.0589983	0.01794885
chr1:214160527	LINC02775	+	0.5611847	0.6784512	-0.1172665	-4.902991	9.364473	0.0007517196	0.0158721571662029	-0.1710519	-0.063481	0.02391733
chr1:214497228	PTPN14	+	0.5961925	0.707182	-0.1109895	-5.795372	10.18078	0.0001623738	0.00781080076099257	-0.153559	-0.06841999	0.0191514
chr1:214641707	CENPF	+	0.5920577	0.4979705	0.09408718	3.919619	10.99034	0.002398358	0.0288219174244695	0.04124871	0.1469257	0.02400416
chr1:215058548	KCNK2	-	0.5668662	0.6663248	-0.09945855	-3.912423	9.642597	0.003110528	0.0331470381515321	-0.1563864	-0.04253068	0.02542122
chr1:215110605	KCNK2	-	0.6158837	0.6972364	-0.08135264	-4.267208	8.728058	0.002240397	0.0277892481339978	-0.1246855	-0.0380198	0.01906461
chr1:215677582	USH2A	-	0.6277559	0.7671007	-0.1393448	-6.959992	8.646649	8.049772e-05	0.00580916431296789	-0.1849188	-0.09377084	0.02002083
chr1:215832716	USH2A	+	0.5130896	0.5956635	-0.0825739	-4.983659	9.838207	0.0005781573	0.0139569389483325	-0.1195742	-0.04557356	0.01656893
chr1:216050340	USH2A	-	0.5674832	0.6545077	-0.08702447	-4.171119	8.945406	0.002439847	0.0290677920643604	-0.1342651	-0.03978383	0.02086358
chr1:216062207	USH2A	+	0.4675737	0.5657388	-0.0981651	-3.814155	10.01405	0.003397345	0.0347735065139977	-0.1554999	-0.04083029	0.02573705
chr1:216067484	USH2A	+	0.6045077	0.6997218	-0.09521412	-5.959122	8.066574	0.0003277518	0.010735609435826	-0.1320063	-0.05842194	0.01597788
chr1:216079986	AC093581.1	+	0.5111025	0.6509799	-0.1398775	-5.215936	9.67229	0.0004370981	0.0122637118435388	-0.1999057	-0.07984917	0.02681732
chr1:216079986	USH2A	+	0.5111025	0.6509799	-0.1398775	-5.215936	9.67229	0.0004370981	0.0122637118435388	-0.1999057	-0.07984917	0.02681732
chr1:216095228	USH2A	-	0.5622999	0.6702277	-0.1079278	-6.805111	10.58322	3.558572e-05	0.00418493880874854	-0.1430035	-0.07285212	0.01585981
chr1:216098878	USH2A	+	0.5405349	0.6361505	-0.0956156	-3.653055	10.94739	0.003829915	0.0371469036743866	-0.1532583	-0.03797291	0.02617414
chr1:216129666	USH2A	+	0.5708116	0.6826004	-0.1117888	-5.058707	8.920483	0.0007011144	0.0153295590631178	-0.1618466	-0.06173098	0.0220983
chr1:216694588	ESRRG	-	0.5792223	0.6918477	-0.1126253	-4.817251	10.48894	0.0006158746	0.0143892018201113	-0.164391	-0.06085964	0.02337958
chr1:21740844	USP48	+	0.5367698	0.3796973	0.1570725	5.010243	7.430306	0.001296346	0.0208836836151317	0.08380237	0.2303427	0.03135028
chr1:217766771	SPATA17	-	0.5725389	0.6685068	-0.09596793	-6.399666	10.9462	5.198222e-05	0.00484742616753006	-0.1289932	-0.06294265	0.01499577
chr1:217829699	SPATA17	+	0.4608133	0.6382779	-0.1774646	-9.595616	10.97449	1.135414e-06	0.00107254063974565	-0.2181819	-0.1367473	0.01849434
chr1:218045050	LINC01653	+	0.5513448	0.6602758	-0.108931	-4.924759	7.07106	0.001655507	0.023723319157325	-0.1611278	-0.0567341	0.02211904
chr1:218512593	C1orf143	-	0.6296579	0.7223688	-0.09271096	-4.999799	10.91775	0.0004119203	0.0119316416237839	-0.1335612	-0.05186068	0.01854294
chr1:219018091	LYPLAL1-DT	+	0.6015299	0.6818418	-0.08031191	-8.723154	10.95446	2.926251e-06	0.00154147833762118	-0.1005861	-0.06003771	0.009206751
chr1:219098700	LYPLAL1-DT	+	0.5952221	0.8051557	-0.2099336	-6.032011	10.88451	8.90938e-05	0.00606179761370556	-0.2866343	-0.1332329	0.03480325
chr1:219735410	SLC30A10	+	0.5309944	0.616023	-0.08502857	-4.429385	10.87539	0.001040848	0.0186945770493013	-0.1273389	-0.04271828	0.01919647
chr1:219736156	SLC30A10	+	0.5844471	0.7227691	-0.138322	-6.32866	10.69801	6.355672e-05	0.00525889377546904	-0.1865939	-0.09005011	0.02185645
chr1:219739596	SLC30A10	+	0.5536615	0.6690249	-0.1153634	-5.635967	10.23796	0.0001985268	0.00853714289262645	-0.1608283	-0.06989862	0.02046915
chr1:219814577	SLC30A10	+	0.504744	0.6346758	-0.1299318	-10.74788	8.65316	2.681247e-06	0.00150619136953498	-0.1574472	-0.1024164	0.01208906
chr1:219927791	SLC30A10	+	0.3947883	0.312344	0.08244434	8.488899	9.830656	7.801121e-06	0.00233061352050169	0.06075398	0.1041347	0.009712018
chr1:221944331	LINC02257	+	0.5122297	0.602997	-0.09076725	-6.12353	7.502651	0.0003649124	0.011303742412866	-0.1253469	-0.05618759	0.0148227
chr1:222122147	AL356108.1	+	0.3476446	0.5650542	-0.2174096	-3.641251	10.93982	0.003913847	0.0375957667249078	-0.348913	-0.08590626	0.0597074
chr1:222364584	AL356108.1	+	0.6929515	0.612917	0.0800345	7.354017	8.229031	6.887273e-05	0.00544377643455421	0.05505909	0.1050099	0.0108831
chr1:222502894	AL513314.2	+	0.5832525	0.6868534	-0.1036009	-4.646633	10.2853	0.0008470327	0.0168546915120411	-0.1530932	-0.0541087	0.02229592
chr1:222544553	HHIPL2	-	0.5271838	0.6392045	-0.1120207	-4.738228	10.77891	0.0006462123	0.0147214309217943	-0.1641867	-0.05985475	0.02364191
chr1:222592953	TAF1A-AS1	-	0.5983528	0.6787179	-0.08036516	-7.610327	10.26515	1.564902e-05	0.00300986205861035	-0.1038122	-0.0569181	0.01056001
chr1:222742102	FAM177B	-	0.5864868	0.6673709	-0.0808841	-4.388268	7.775641	0.002487495	0.0293890845755617	-0.1236025	-0.03816564	0.0184319
chr1:222742135	FAM177B	-	0.5869968	0.6704223	-0.08342554	-4.050808	10.70322	0.002021361	0.0262862236783569	-0.1289082	-0.03794289	0.02059479
chr1:224401907	WDR26	+	0.5336629	0.4172169	0.116446	9.054233	10.32528	3.12304e-06	0.00157634215336195	0.08791193	0.1449801	0.01286095
chr1:224573157	CNIH3	-	0.5527482	0.6336922	-0.08094398	-3.88627	9.269953	0.003493805	0.0353015033746438	-0.1278523	-0.03403567	0.02082819
chr1:224935486	DNAH14	+	0.5675211	0.6487279	-0.0812068	-4.009025	10.18295	0.002393724	0.0287937162614425	-0.1262303	-0.03618329	0.020256
chr1:225027050	DNAH14	-	0.6093439	0.722285	-0.1129411	-7.335467	7.77993	9.340653e-05	0.00617201206073134	-0.1486212	-0.07726093	0.01539658
chr1:225063027	DNAH14	+	0.606754	0.6879117	-0.08115771	-4.131745	8.342334	0.00300578	0.0325409038233173	-0.1261318	-0.03618358	0.01964248
chr1:225198957	DNAH14	-	0.5821238	0.6863507	-0.1042269	-3.817584	7.960428	0.005154754	0.0437505072859359	-0.1672395	-0.04121434	0.0273018
chr1:225216794	DNAH14	-	0.6713146	0.7536508	-0.08233616	-6.263624	10.34152	8.062587e-05	0.00581302588806191	-0.1114948	-0.05317756	0.01314513
chr1:225242479	DNAH14	-	0.6070339	0.690682	-0.08364813	-3.959315	9.960996	0.002709998	0.0307641602781576	-0.1307468	-0.03654942	0.02112692
chr1:225279859	DNAH14	+	0.6405917	0.7277599	-0.08716819	-5.760244	11	0.000126452	0.00700824356110587	-0.1204751	-0.05386128	0.01513272
chr1:225313558	DNAH14	-	0.6140742	0.7128194	-0.0987452	-5.627151	10.95909	0.0001561079	0.00767311214938005	-0.1373857	-0.06010473	0.01754799
chr1:227068918	CDC42BPA	+	0.5979852	0.7053724	-0.1073872	-8.77686	9.804064	5.928119e-06	0.00208580610528137	-0.1347232	-0.08005134	0.01223527
chr1:227149901	CDC42BPA	+	0.5817151	0.692071	-0.1103559	-4.606976	10.46903	0.000860294	0.0169981115193347	-0.1634066	-0.05730524	0.0239541
chr1:230751311	CAPN9	+	0.6028208	0.6889421	-0.08612127	-6.072804	10.1118	0.0001144996	0.00672450480615897	-0.1176723	-0.05457029	0.01418147
chr1:230751311	AL512328.1	+	0.6028208	0.6889421	-0.08612127	-6.072804	10.1118	0.0001144996	0.00672450480615897	-0.1176723	-0.05457029	0.01418147
chr1:230751334	AL512328.1	+	0.5302799	0.6312558	-0.1009759	-5.667323	10.71597	0.0001600551	0.00775423827590113	-0.1403185	-0.06163327	0.01781721
chr1:230751334	CAPN9	+	0.5302799	0.6312558	-0.1009759	-5.667323	10.71597	0.0001600551	0.00775423827590113	-0.1403185	-0.06163327	0.01781721
chr1:230756550	CAPN9	+	0.6084477	0.7059489	-0.09750124	-4.570071	10.99495	0.000804229	0.0164157399599364	-0.1444613	-0.05054119	0.02133473
chr1:230756550	AL512328.1	+	0.6084477	0.7059489	-0.09750124	-4.570071	10.99495	0.000804229	0.0164157399599364	-0.1444613	-0.05054119	0.02133473
chr1:230768450	AL512328.1	-	0.5594171	0.6617514	-0.1023343	-5.123616	9.220116	0.0005791988	0.0139684522792303	-0.1473527	-0.05731601	0.01997307
chr1:230768450	CAPN9	-	0.5594171	0.6617514	-0.1023343	-5.123616	9.220116	0.0005791988	0.0139684522792303	-0.1473527	-0.05731601	0.01997307
chr1:231216360	TRIM67	-	0.4921535	0.5903532	-0.09819975	-4.724026	10.02512	0.0008059249	0.0164322935971885	-0.144501	-0.05189848	0.0207873
chr1:231489591	AL445524.2	+	0.5785099	0.6703543	-0.09184447	-7.631661	10.73217	1.178462e-05	0.00269988322522727	-0.1184135	-0.06527548	0.01203466
chr1:231509902	AL445524.2	+	0.6180651	0.7288735	-0.1108085	-8.413794	10.08999	7.123761e-06	0.00226737712820704	-0.1401173	-0.08149962	0.01316986
chr1:232031728	DISC1	+	0.5936922	0.6796964	-0.08600416	-6.429595	10.88741	5.113955e-05	0.00481974054334268	-0.1154824	-0.05652594	0.0133763
chr1:232496030	SIPA1L2	+	0.5949147	0.6828828	-0.08796813	-4.430252	10.98628	0.001014243	0.0184420601939033	-0.1316781	-0.04425819	0.01985623
chr1:233382977	MAP3K21	-	0.5851496	0.6718157	-0.08666615	-4.456582	9.178175	0.00151017	0.0225770609230932	-0.130528	-0.04280433	0.01944677
chr1:233926238	SLC35F3	-	0.631833	0.7370752	-0.1052421	-4.403146	10.93697	0.001072241	0.0189550751086031	-0.1578862	-0.05259811	0.02390157
chr1:233938593	SLC35F3	+	0.662007	0.7452382	-0.08323111	-4.855541	10.60898	0.0005617418	0.0137857824505808	-0.1211296	-0.04533263	0.01714147
chr1:233979148	SLC35F3	+	0.5351388	0.663717	-0.1285783	-9.511774	8.042379	1.188356e-05	0.00271198443098318	-0.1597218	-0.09743474	0.0135178
chr1:233982300	SLC35F3	-	0.5224053	0.6183542	-0.0959489	-4.666015	10.06622	0.0008706463	0.0171051487823036	-0.1417261	-0.05017173	0.02056335
chr1:234013812	SLC35F3	+	0.6015141	0.7046908	-0.1031767	-5.812773	8.570468	0.0003077807	0.0104344478875757	-0.1436389	-0.06271456	0.01775
chr1:234151656	SLC35F3	+	0.5113434	0.6556865	-0.144343	-3.748606	10.8477	0.003295303	0.034196819453873	-0.2292391	-0.05944696	0.03850579
chr1:234191641	SLC35F3	+	0.5250035	0.6065984	-0.0815949	-5.707005	9.917382	0.0002026598	0.00861861670492347	-0.1134873	-0.04970246	0.01429732
chr1:235764276	LYST	-	0.5690082	0.6573238	-0.08831563	-3.823019	9.279831	0.003847851	0.0372462665695218	-0.1403345	-0.03629672	0.02310102
chr1:235817267	LYST	+	0.5253323	0.6270604	-0.1017281	-6.292773	10.64354	6.827444e-05	0.00542620043117468	-0.1374549	-0.06600136	0.01616586
chr1:235837998	LYST	+	0.5825652	0.6873918	-0.1048266	-4.5448	9.492778	0.001218384	0.0202081232098533	-0.1565937	-0.05305954	0.02306518
chr1:236173462	GPR137B	+	0.621445	0.531223	0.09022197	5.146091	10.99993	0.0003201916	0.0106139645667324	0.05163397	0.12881	0.01753214
chr1:236681652	ACTN2	-	0.4709895	0.5672469	-0.09625739	-4.090944	9.421347	0.002464476	0.0292341142833608	-0.1491239	-0.0433909	0.02352938
chr1:237258279	RYR2	+	0.5104085	0.5958914	-0.08548291	-3.9668	8.64022	0.003546897	0.0356100202691224	-0.1345427	-0.03642316	0.02154959
chr1:237344625	RYR2	-	0.5894627	0.6750666	-0.08560394	-5.167653	8.220604	0.0007852173	0.0162320297417829	-0.123626	-0.04758189	0.01656534
chr1:237351129	RYR2	+	0.5484966	0.6640041	-0.1155075	-5.039059	10.30188	0.0004630349	0.0125870110047577	-0.1663798	-0.06463528	0.02292244
chr1:237623628	RYR2	-	0.5373828	0.6444489	-0.1070661	-3.981426	9.915259	0.002638912	0.0303260210269857	-0.1670533	-0.04707885	0.02689139
chr1:237697625	RYR2	-	0.592968	0.700424	-0.1074561	-5.255958	8.81191	0.0005610022	0.0137777665111026	-0.1538559	-0.0610562	0.02044462
chr1:237923303	AL359924.1	-	0.5583766	0.7057584	-0.1473817	-7.997647	10.73855	7.612512e-06	0.00231038920650323	-0.1880626	-0.1067009	0.01842814
chr1:238283233	AL356010.2	-	0.5199083	0.6303697	-0.1104614	-5.934082	10.99013	9.851233e-05	0.00633094243893898	-0.1514367	-0.06948615	0.01861475
chr1:238283322	AL356010.2	-	0.5217728	0.642917	-0.1211441	-4.083487	7.336786	0.00422557	0.0391847924346912	-0.1906475	-0.05164076	0.02966684
chr1:238365849	AL356010.2	-	0.6098093	0.7343309	-0.1245216	-5.681853	9.785874	0.0002205019	0.00894626675173861	-0.173498	-0.07554523	0.02191567
chr1:238365865	AL356010.2	-	0.608263	0.6887716	-0.08050869	-3.470174	9.847737	0.00615757	0.0482700433804366	-0.1323105	-0.0287069	0.02320019
chr1:238367704	AL356010.2	-	0.5311189	0.6762989	-0.14518	-7.48622	9.727158	2.445244e-05	0.0035916894911881	-0.1885551	-0.1018049	0.01939297
chr1:238403522	AL356010.2	-	0.6155647	0.7227753	-0.1072105	-4.471614	8.771743	0.001653309	0.023706264655267	-0.1616635	-0.05275759	0.0239758
chr1:238479272	LINC01139	-	0.6496493	0.7570547	-0.1074054	-5.712064	7.016959	0.0007199999	0.0155299921088797	-0.1518463	-0.06296455	0.01880326
chr1:23883139	CNR2	+	0.621306	0.4549293	0.1663766	4.124271	6.349777	0.005475444	0.0452743168649738	0.0689693	0.263784	0.04034086
chr1:23910646	CNR2	+	0.4519493	0.5616547	-0.1097055	-6.959038	8.718959	7.736142e-05	0.00571882392045145	-0.1455432	-0.0738678	0.01576446
chr1:239455704	CHRM3	+	0.6370903	0.7671802	-0.1300899	-9.910528	10.99324	8.127483e-07	0.000938631172946808	-0.1589832	-0.1011967	0.01312644
chr1:239482172	CHRM3	-	0.5743514	0.7072978	-0.1329463	-6.60483	10.38185	5.059739e-05	0.00479717654555959	-0.1775732	-0.0883195	0.02012865
chr1:239634326	CHRM3	+	0.6038966	0.7058844	-0.1019878	-7.432157	7.156121	0.0001302959	0.00709697779980703	-0.1342934	-0.06968219	0.0137225
chr1:239635925	CHRM3	+	0.5999573	0.6981203	-0.09816301	-4.415448	7.805505	0.002378242	0.0286954171233521	-0.1496527	-0.04667336	0.02223172
chr1:239642767	CHRM3	-	0.5880535	0.6695048	-0.08145132	-5.197735	10.32547	0.000362912	0.0112784786595984	-0.1162189	-0.04668379	0.01567054
chr1:240380602	FMN2	+	0.5381947	0.6545792	-0.1163845	-4.92995	9.595156	0.0006733801	0.0150238899314984	-0.1692881	-0.06348103	0.02360765
chr1:240548675	GREM2	+	0.5926355	0.6864275	-0.09379198	-5.964086	8.218324	0.0003030214	0.010363268944361	-0.1298895	-0.05769447	0.01572613
chr1:240568130	GREM2	+	0.5522255	0.6475059	-0.0952804	-4.975406	9.95968	0.0005639952	0.013809936600458	-0.1379733	-0.0525875	0.01915028
chr1:240568744	GREM2	+	0.6045724	0.6906851	-0.0861127	-5.166076	8.881114	0.0006157842	0.0143880425154636	-0.1238974	-0.04832798	0.01666888
chr1:24067494	MYOM3	-	0.3897621	0.4806541	-0.09089197	-4.351914	10.65973	0.001239223	0.0203903257923516	-0.1370404	-0.04474359	0.02088552
chr1:24067494	AL591178.1	-	0.3897621	0.4806541	-0.09089197	-4.351914	10.65973	0.001239223	0.0203903257923516	-0.1370404	-0.04474359	0.02088552
chr1:24067494	MYOM3-AS1	-	0.3897621	0.4806541	-0.09089197	-4.351914	10.65973	0.001239223	0.0203903257923516	-0.1370404	-0.04474359	0.02088552
chr1:240922016	RGS7	+	0.5472578	0.6351481	-0.08789024	-6.913491	10.76772	2.835703e-05	0.00381083072289604	-0.1159449	-0.0598356	0.01271286
chr1:240951310	RGS7	+	0.5517955	0.6395815	-0.08778604	-6.103637	9.369161	0.0001511225	0.00755971397189139	-0.1201273	-0.05544476	0.01438258
chr1:240993522	RGS7	+	0.5505686	0.6320067	-0.08143809	-3.609256	9.334148	0.00533763	0.0446231685925004	-0.1322035	-0.03067269	0.02256368
chr1:240996587	RGS7	-	0.5755436	0.6649927	-0.08944914	-4.71529	9.588876	0.0009221191	0.0175894425151372	-0.1319639	-0.04693436	0.01897002
chr1:241032707	RGS7	-	0.5812034	0.3319287	0.2492747	4.941948	9.770664	0.0006272032	0.0145066556505734	0.1365275	0.3620219	0.05044057
chr1:241133268	RGS7	+	0.5621966	0.6492079	-0.08701131	-7.505216	10.67338	1.417382e-05	0.00289714358223284	-0.1126239	-0.06139872	0.01159344
chr1:241216422	RGS7	+	0.5816077	0.6658608	-0.08425312	-3.55168	10.75886	0.004694195	0.0415034556165662	-0.1366081	-0.03189812	0.02372205
chr1:241697710	WDR64	-	0.6571632	0.7412477	-0.08408452	-6.990338	7.348437	0.0001702382	0.00797279035355413	-0.1122567	-0.05591235	0.01202868
chr1:242150638	AL591686.2	-	0.6624285	0.7561287	-0.09370021	-3.729822	7.62185	0.006313634	0.0489549023171254	-0.1521355	-0.03526489	0.0251219
chr1:242150638	PLD5	-	0.6624285	0.7561287	-0.09370021	-3.729822	7.62185	0.006313634	0.0489549023171254	-0.1521355	-0.03526489	0.0251219
chr1:242191585	PLD5	+	0.5456104	0.6293954	-0.08378505	-5.509862	10.893	0.000190053	0.00836815478940472	-0.1172942	-0.05027588	0.01520638
chr1:242191585	AL591686.2	+	0.5456104	0.6293954	-0.08378505	-5.509862	10.893	0.000190053	0.00836815478940472	-0.1172942	-0.05027588	0.01520638
chr1:242191605	PLD5	+	0.4739075	0.5697605	-0.09585293	-6.755195	10.12884	4.706839e-05	0.00465887268588161	-0.1274147	-0.06429115	0.01418951
chr1:242191605	AL591686.2	+	0.4739075	0.5697605	-0.09585293	-6.755195	10.12884	4.706839e-05	0.00465887268588161	-0.1274147	-0.06429115	0.01418951
chr1:242232110	PLD5	+	0.5176298	0.6083138	-0.09068393	-5.245898	6.93651	0.001226362	0.020283235277283	-0.1316363	-0.04973156	0.01728664
chr1:242383145	PLD5	-	0.4472092	0.5281101	-0.08090087	-5.320569	10.98061	0.0002460408	0.00942484120883774	-0.1143747	-0.04742701	0.01520531
chr1:243041452	SEPTIN14P21	-	0.4911532	0.5828649	-0.09171161	-3.448152	10.99869	0.005446693	0.0451405093091035	-0.1502528	-0.03317045	0.02659732
chr1:243180052	CEP170	+	0.6154026	0.5334368	0.08196588	4.714377	10.99432	0.0006360862	0.0146117809016538	0.04369633	0.1202354	0.01738636
chr1:243180071	CEP170	+	0.6642583	0.5748274	0.08943083	5.164912	9.392038	0.0005160279	0.0132544055821716	0.05050924	0.1283524	0.01731507
chr1:243584162	AKT3	+	0.6328076	0.7134696	-0.08066199	-5.540041	10.99897	0.0001754172	0.00807545119532881	-0.1127083	-0.04861569	0.01455982
chr1:243971970	LINC02774	-	0.595954	0.6997026	-0.1037486	-6.400018	6.787755	0.0004170004	0.0120057969421029	-0.1423251	-0.06517214	0.01621068
chr1:244510874	CATSPERE	-	0.5667069	0.6574619	-0.09075494	-4.508333	10.0602	0.001111604	0.0193179659279874	-0.1355721	-0.04593778	0.02013049
chr1:245064895	EFCAB2	-	0.6165645	0.7017379	-0.0851734	-4.957588	10.46701	0.0004992049	0.0130363957518782	-0.1232235	-0.04712332	0.01718041
chr1:245261271	KIF26B	-	0.6007522	0.7225044	-0.1217522	-7.613427	8.428486	4.701915e-05	0.00465827499316077	-0.1583055	-0.08519891	0.01599178
chr1:245439466	KIF26B	+	0.5454928	0.6519061	-0.1064133	-4.343615	9.515721	0.001638087	0.0235747082508005	-0.1613789	-0.05144769	0.02449879
chr1:245596078	KIF26B	-	0.5762605	0.6631494	-0.08688889	-6.871655	10.18903	3.954132e-05	0.00434420716693649	-0.114992	-0.0587858	0.01264454
chr1:246197035	SMYD3	+	0.6366683	0.7302819	-0.09361361	-6.504513	10.31639	5.936193e-05	0.00512323629546288	-0.1255484	-0.06167882	0.0143921
chr1:246816751	KIF28P	+	0.548762	0.6410018	-0.0922398	-4.428723	6.696012	0.003396624	0.0347693984315432	-0.1419462	-0.04253339	0.02082763
chr1:246828495	KIF28P	-	0.5805184	0.6747024	-0.09418399	-4.144906	10.75223	0.001710835	0.0241300230906456	-0.1443376	-0.04403042	0.02272283
chr1:247012746	ZNF670-ZNF695	-	0.6516789	0.7866167	-0.1349378	-7.102688	10.73123	2.265727e-05	0.00348701039834567	-0.1768806	-0.0929951	0.01899814
chr1:247018613	ZNF670-ZNF695	+	0.5410748	0.6349712	-0.09389637	-5.313975	9.993096	0.000341459	0.0109590385456654	-0.1332706	-0.05452213	0.0176697
chr1:247778358	OR9H1P	-	0.6319865	0.7162747	-0.08428817	-6.013183	9.326061	0.0001725457	0.00802265481589696	-0.1158292	-0.05274718	0.01401723
chr1:248056220	OR2L3	-	0.5479235	0.6697295	-0.121806	-4.254891	8.14519	0.00266895	0.0305018225779023	-0.1876165	-0.05599563	0.0286273
chr1:248590736	OR2T10	-	0.5793794	0.6814713	-0.1020919	-4.228511	7.580037	0.003254935	0.0339797121351539	-0.1583089	-0.04587491	0.0241437
chr1:248703383	LYPD9P	-	0.5379925	0.627789	-0.08979646	-4.914588	10.31849	0.0005560676	0.0137238184112514	-0.130338	-0.04925491	0.01827141
chr1:248703383	CR589904.2	-	0.5379925	0.627789	-0.08979646	-4.914588	10.31849	0.0005560676	0.0137238184112514	-0.130338	-0.04925491	0.01827141
chr1:248720147	CR589904.2	+	0.4860122	0.6062492	-0.120237	-5.556757	9.513753	0.0002894975	0.0101760925238842	-0.1687855	-0.07168846	0.02163798
chr1:248734870	CR589904.2	-	0.6232346	0.7121089	-0.08887431	-4.587492	10.98893	0.00078275	0.0162065607303189	-0.1315196	-0.04622898	0.01937318
chr1:24922301	RUNX3	-	0.6162551	0.7079121	-0.091657	-5.217524	7.046104	0.001204061	0.0200833845582082	-0.1331417	-0.05017234	0.01756714
chr1:24953330	RUNX3	+	0.5001448	0.4053715	0.09477325	3.574253	10.77563	0.004503196	0.0405683776177405	0.03626433	0.1532822	0.02651554
chr1:2619750	MMEL1	+	0.555916574280238	0.643615565870543	-0.087698991590305	-3.72028751413471	8.10241066019741	0.00573790160771659	0.0464308639820313	-0.141939468379575	-0.033458514801035	0.0235731757981352
chr1:2626867	MMEL1	+	0.458505582963791	0.587951735365528	-0.129446152401737	-6.20811948225922	9.69340395701913	0.000114741556190755	0.00672569385837694	-0.176105267312076	-0.082787037491399	0.0208511051972586
chr1:26308389	UBXN11	+	0.3861797	0.2793434	0.1068363	3.629714	10.99048	0.003964082	0.0378644042839159	0.04204608	0.1716265	0.02943381
chr1:2653103	TTC34	-	0.512406947890819	0.601067353698933	-0.0886604058081137	-5.40939833397528	8.03703931676169	0.000628919169502935	0.0145256408147487	-0.126425672514348	-0.0508951391018793	0.0163900678660058
chr1:2654149	TTC34	+	0.443516965184021	0.547804845844062	-0.104287880660041	-4.8601387622367	8.28966236478497	0.0011340914887978	0.0195122512272639	-0.153470303791635	-0.0551054575284472	0.0214577989975015
chr1:2654153	TTC34	+	0.521091157809609	0.615733297109285	-0.0946421392996756	-5.24276318765751	9.77232711288972	0.000406944102796236	0.0118629266287954	-0.134991790910858	-0.0542924876884936	0.018051957700947
chr1:2695904	TTC34	+	0.568869880779946	0.65369166741118	-0.0848217866312331	-3.8449587104543	10.9995852555129	0.00272328694812932	0.0308502203729271	-0.133376886055471	-0.0362666872069956	0.0220605195058677
chr1:29348559	LINC01756	-	0.5903409	0.7032255	-0.1128845	-4.240319	6.508634	0.004526189	0.0406733912563675	-0.1768112	-0.04895787	0.02662171
chr1:31194917	NKAIN1	-	0.6361441	0.7213893	-0.08524519	-5.276015	7.25347	0.001029036	0.0185868633658842	-0.1231817	-0.04730867	0.01615712
chr1:3158562	PRDM16	-	0.470573563926531	0.385630001686713	0.084943562239818	6.17328377896822	10.7677420962627	7.64793549351902e-05	0.00568727048368563	0.0545784085419469	0.115308715937689	0.0137598667550668
chr1:32680200	SYNC	-	0.5759137	0.438453	0.1374607	5.120965	10.69288	0.0003641735	0.0112950449506615	0.07817255	0.1967489	0.02684274
chr1:32680200	RBBP4	-	0.5759137	0.438453	0.1374607	5.120965	10.69288	0.0003641735	0.0112950449506615	0.07817255	0.1967489	0.02684274
chr1:33565626	CSMD2	+	0.5991259	0.6846534	-0.08552751	-6.557387	10.74024	4.585091e-05	0.00461627645241832	-0.1143197	-0.05673529	0.01304293
chr1:33581446	CSMD2	+	0.5434132	0.6328737	-0.08946051	-4.022328	9.393253	0.002756931	0.0310533240332338	-0.1394538	-0.03946718	0.02224098
chr1:33665319	CSMD2	-	0.565246	0.652956	-0.08771003	-6.05761	10.63452	9.470207e-05	0.00620935654752369	-0.1197129	-0.05570714	0.01447931
chr1:33682896	CSMD2	-	0.5620434	0.6667537	-0.1047103	-5.673874	10.9718	0.000145037	0.00742935483703462	-0.1453418	-0.06407877	0.01845481
chr1:33688118	CSMD2	+	0.6400747	0.7319005	-0.09182573	-4.108035	8.063532	0.003342785	0.0344621808589607	-0.1433006	-0.04035089	0.02235271
chr1:33935239	CSMD2	+	0.4928835	0.5838549	-0.09097135	-8.125829	7.035333	8.025318e-05	0.00580091994842359	-0.1174172	-0.06452553	0.01119533
chr1:34098319	CSMD2	+	0.5363353	0.62739	-0.09105465	-4.248656	10.22173	0.001611933	0.0233698970334073	-0.1386667	-0.04344255	0.0214314
chr1:34116211	CSMD2	+	0.5983161	0.6838071	-0.08549096	-6.028652	10.99117	8.595516e-05	0.00598058293422402	-0.1167057	-0.05427622	0.01418078
chr1:34200292	C1orf94	+	0.6192642	0.7079029	-0.08863872	-4.07424	9.574629	0.002445399	0.0291081311611646	-0.1374074	-0.03987007	0.02175589
chr1:34200383	C1orf94	+	0.5754196	0.6569484	-0.0815288	-5.723067	10.98196	0.0001344071	0.00718923487512317	-0.1128895	-0.05016806	0.01424565
chr1:35050587	ZMYM1	-	0.6238725	0.7189194	-0.0950469	-5.224924	10.79344	0.000301509	0.0103450016150442	-0.1351788	-0.05491496	0.01819106
chr1:35069360	ZMYM1	-	0.621202	0.754809	-0.133607	-7.008044	8.897829	6.635626e-05	0.00537049295679083	-0.1768102	-0.0904038	0.01906481
chr1:35073104	ZMYM1	+	0.6388466	0.7287504	-0.08990377	-5.958899	10.68466	0.00010665	0.00654225150947414	-0.1232307	-0.05657686	0.01508731
chr1:3562093	MEGF6	-	0.604693552061973	0.692603081248929	-0.0879095291869555	-4.23362265983166	10.6788851321445	0.00149866279866784	0.0224772343975935	-0.133780362042064	-0.0420386963318466	0.0207646113625183
chr1:3562145	MEGF6	-	0.609325396825397	0.707312060544819	-0.0979866637194224	-5.10994657313993	10.5679101935715	0.000384337777681915	0.0115688953065094	-0.140403533102345	-0.0555697943365003	0.0191756728405894
chr1:36895474	GRIK3	+	0.4940628	0.5750362	-0.08097341	-5.56955	10.279	0.0002149088	0.00884247059285714	-0.1132486	-0.0486982	0.01453859
chr1:36899254	GRIK3	+	0.6188609	0.7209946	-0.1021337	-4.255428	10.5107	0.001497964	0.0224720077203053	-0.1552607	-0.0490067	0.02400081
chr1:37221442	AL353604.1	+	0.6119338	0.7004889	-0.08855506	-6.687653	9.883856	5.761292e-05	0.00505823991184227	-0.1181062	-0.05900393	0.01324157
chr1:37221941	AL353604.1	+	0.5760035	0.6909274	-0.1149238	-4.840378	8.50273	0.001082593	0.0190355116223961	-0.1691163	-0.06073137	0.02374274
chr1:37417885	LINC01137	+	0.6843746	0.7771415	-0.09276693	-13.10512	8.239404	8.343254e-07	0.000946528821764045	-0.1090082	-0.07652567	0.007078677
chr1:37850413	MTF1	+	0.4901787	0.4081748	0.08200391	4.606444	10.76061	0.0008015243	0.0163899555847774	0.04271537	0.1212924	0.017802
chr1:38118721	MIR3659HG	-	0.4924975	0.579171	-0.08667347	-3.696493	10.73193	0.003670368	0.0362845210091203	-0.1384388	-0.03490818	0.02344749
chr1:39139414	MACF1	-	0.6605923	0.7474343	-0.08684191	-6.035247	8.815534	0.0002108975	0.008771213147669	-0.1194965	-0.05418733	0.01438912
chr1:41337005	AC093151.7	-	0.5120408	0.6276501	-0.1156093	-5.134258	9.827993	0.0004663957	0.0126259428356285	-0.1659001	-0.06531848	0.02251723
chr1:41819590	HIVEP3	-	0.6141361	0.7263399	-0.1122038	-7.69633	10.20799	1.463618e-05	0.00293054596959172	-0.144598	-0.07980952	0.01457887
chr1:42453265	ZMYND12	+	0.5778233	0.6799342	-0.102111	-6.552838	7.883852	0.0001898226	0.00836479550059327	-0.1381371	-0.06608481	0.01558271
chr1:42572442	CCDC30	-	0.630637	0.7524125	-0.1217755	-5.332328	9.86536	0.0003474169	0.0110482457177656	-0.1727542	-0.07079672	0.02283721
chr1:43251877	EBNA1BP2	+	0.6267896	0.7156349	-0.08884528	-4.797768	8.95384	0.0009909849	0.0182244886607115	-0.130769	-0.04692161	0.01851805
chr1:43251877	CFAP57	+	0.6267896	0.7156349	-0.08884528	-4.797768	8.95384	0.0009909849	0.0182244886607115	-0.130769	-0.04692161	0.01851805
chr1:44070441	AL139220.2	-	0.6526213	0.7851169	-0.1324957	-6.666635	9.84786	6.016288e-05	0.005152467177453	-0.1768716	-0.08811973	0.01987444
chr1:44070528	AL139220.2	-	0.6292769	0.7446108	-0.1153339	-5.570887	7.659819	0.0006150912	0.0143779897773104	-0.1634466	-0.06722117	0.02070297
chr1:44429752	RNF220	+	0.4082609	0.4962942	-0.08803331	-4.209721	8.20716	0.002792743	0.0312772943339523	-0.1360452	-0.04002141	0.02091191
chr1:44665696	TMEM53	+	0.5908928	0.6839109	-0.09301811	-4.715206	9.918023	0.0008410695	0.0167870135382842	-0.1370225	-0.04901373	0.01972726
chr1:45030996	ZSWIM5	-	0.6508863	0.7574314	-0.1065451	-5.385011	6.764874	0.001146149	0.019611126324321	-0.153662	-0.05942819	0.0197855
chr1:45684408	GPBP1L1	+	0.4231281	0.3238552	0.09927292	3.960703	10.63763	0.002379998	0.0287071693954053	0.04387625	0.1546696	0.02506447
chr1:46501442	DMBX1	-	0.5303505	0.6127903	-0.08243984	-7.676707	10.79758	1.077023e-05	0.00262514975227822	-0.1061303	-0.05874938	0.01073896
chr1:47076130	CYP4Z1	-	0.5893904	0.6715771	-0.08218671	-4.17934	10.39731	0.001736716	0.0243120493889738	-0.1257772	-0.03859626	0.019665
chr1:47112216	CYP4A22-AS1	+	0.5045976	0.6088952	-0.1042976	-3.891167	10.99949	0.002514743	0.0295502194305579	-0.1632924	-0.04530275	0.02680368
chr1:47112216	CYP4Z1	+	0.5045976	0.6088952	-0.1042976	-3.891167	10.99949	0.002514743	0.0295502194305579	-0.1632924	-0.04530275	0.02680368
chr1:47164078	CYP4A22-AS1	+	0.6026903	0.719163	-0.1164726	-6.350053	10.42419	6.936391e-05	0.00545700530711658	-0.1571168	-0.07582841	0.01834199
chr1:48111426	SKINT1L	+	0.5279605	0.6304694	-0.1025089	-7.691267	8.803097	3.425789e-05	0.00412729489673041	-0.1327619	-0.07225584	0.01332796
chr1:48333786	SPATA6	+	0.5670268	0.6552775	-0.08825065	-3.616946	9.279885	0.005323257	0.0445505124022416	-0.1431928	-0.03330851	0.02439922
chr1:48336111	SPATA6	+	0.6693466	0.5575919	0.1117547	3.83678	10.90765	0.00280398	0.0313406133269182	0.04757984	0.1759295	0.02912721
chr1:48358587	SPATA6	+	0.588412	0.6778716	-0.0894596	-3.796025	9.507462	0.003841739	0.0372121265206111	-0.1423405	-0.03657874	0.02356665
chr1:48358640	SPATA6	+	0.6008278	0.7470719	-0.1462442	-8.49885	10.86751	3.970715e-06	0.00175081045519051	-0.1841741	-0.1083142	0.01720752
chr1:48361288	SPATA6	+	0.5705019	0.6759259	-0.105424	-4.036516	7.558431	0.004223365	0.0391723515572833	-0.1662693	-0.04457881	0.02611758
chr1:48415975	SPATA6	+	0.5657327	0.6791442	-0.1134115	-3.745251	9.380548	0.004264718	0.0393562236598922	-0.1814916	-0.04533148	0.03028143
chr1:48427180	SPATA6	+	0.5929508	0.6845152	-0.0915644	-4.294142	10.50527	0.001408117	0.0217719164670245	-0.1387673	-0.04436151	0.0213231
chr1:48430326	SPATA6	+	0.5756877	0.6770973	-0.1014096	-5.314807	10.67371	0.0002731533	0.00989916645126085	-0.1435628	-0.05925635	0.01908058
chr1:48432319	SPATA6	+	0.5243214	0.6251931	-0.1008716	-6.426279	9.701476	8.684878e-05	0.00599701916775614	-0.1359926	-0.06575069	0.01569674
chr1:48464916	SPATA6	+	0.7594494	0.6657615	0.09368795	5.058185	7.448472	0.001216311	0.0201879760193113	0.05041921	0.1369567	0.01852205
chr1:49007085	AGBL4	+	0.5783517	0.6658202	-0.08746852	-3.925699	10.99814	0.002370273	0.0286375520230635	-0.1365097	-0.03842735	0.02228101
chr1:49071272	AC099788.1	-	0.4828575	0.5772227	-0.09436519	-3.884283	10.25754	0.00289657	0.0318915509688568	-0.1483122	-0.0404182	0.02429411
chr1:49071272	AGBL4	-	0.4828575	0.5772227	-0.09436519	-3.884283	10.25754	0.00289657	0.0318915509688568	-0.1483122	-0.0404182	0.02429411
chr1:49119183	AC099788.1	-	0.5124811	0.6063672	-0.09388611	-6.535612	6.968821	0.0003293389	0.0107634224770275	-0.1278855	-0.05988671	0.01436531
chr1:49119183	AGBL4	-	0.5124811	0.6063672	-0.09388611	-6.535612	6.968821	0.0003293389	0.0107634224770275	-0.1278855	-0.05988671	0.01436531
chr1:49119298	AC099788.1	-	0.5649383	0.6497219	-0.0847836	-3.616224	10.99693	0.004054945	0.0383302758262669	-0.1363882	-0.03317899	0.02344534
chr1:49119298	AGBL4	-	0.5649383	0.6497219	-0.0847836	-3.616224	10.99693	0.004054945	0.0383302758262669	-0.1363882	-0.03317899	0.02344534
chr1:49203194	AGBL4	+	0.5817962	0.7067713	-0.124975	-6.881321	10.10665	4.069263e-05	0.00439895452451761	-0.1653836	-0.08456653	0.01816149
chr1:49238286	AGBL4	-	0.5650102	0.6509005	-0.08589028	-3.567478	10.52022	0.004728326	0.0416704840511815	-0.1391773	-0.03260321	0.02407591
chr1:49257131	AGBL4	+	0.5314843	0.6589812	-0.127497	-4.882339	5.816806	0.0030075	0.0325505354924306	-0.1918864	-0.06310754	0.02611391
chr1:49501381	AGBL4	-	0.6229649	0.7088809	-0.08591606	-5.921095	10.99222	0.0001003015	0.00637672813891892	-0.1178555	-0.05397664	0.01451016
chr1:49590520	AGBL4	+	0.4448475	0.541695	-0.09684753	-8.82284	8.507495	1.449352e-05	0.0029220889697	-0.1218999	-0.07179517	0.01097691
chr1:49651765	AGBL4	+	0.5800662	0.6805848	-0.1005186	-4.855301	10.58593	0.0005654751	0.0138286783062091	-0.1463037	-0.05473354	0.02070286
chr1:49693520	AGBL4	+	0.6255768	0.7332202	-0.1076434	-4.168451	10.86977	0.00160717	0.0233311895017281	-0.1645634	-0.05072339	0.02582336
chr1:49736125	AGBL4	+	0.5353574	0.6732743	-0.1379169	-11.70443	9.316027	7.018069e-07	0.000899325027377224	-0.1644354	-0.1113984	0.0117833
chr1:49762648	AGBL4	-	0.5831212	0.667319	-0.08419779	-4.4836	6.603785	0.003297556	0.0342048236960516	-0.1291491	-0.03924653	0.01877906
chr1:49770736	AGBL4	-	0.3505231	0.4716389	-0.1211158	-5.47968	10.34283	0.0002390418	0.00929806849363321	-0.1701434	-0.07208827	0.02210272
chr1:49795626	AGBL4	+	0.4869986	0.5829519	-0.09595322	-3.872301	9.790971	0.003222081	0.0337963124897434	-0.1513253	-0.04058113	0.02477938
chr1:49805170	AGBL4	+	0.5932448	0.6865967	-0.09335194	-3.728882	8.18682	0.005563345	0.0456656230262546	-0.1508539	-0.03585002	0.02503483
chr1:49868714	AGBL4	+	0.6219918	0.7201246	-0.09813278	-4.524434	9.174524	0.001369248	0.0214551398414496	-0.147056	-0.0492096	0.02168951
chr1:49894987	AGBL4	+	0.5584127	0.6579727	-0.09955998	-5.499585	9.958143	0.0002658799	0.00977938020106854	-0.1399194	-0.05920059	0.01810318
chr1:49895336	AGBL4	+	0.5665375	0.6527793	-0.08624171	-5.742488	10.82613	0.0001380094	0.00728659344717546	-0.1193614	-0.05312204	0.01501818
chr1:50102660	ELAVL4	-	0.5707479	0.6650922	-0.09434433	-7.126489	10.58842	2.36107e-05	0.00354156181829968	-0.1236209	-0.0650677	0.01323854
chr1:51506766	EPS15	+	0.6150663	0.7217113	-0.106645	-4.401442	5.583301	0.005411612	0.0449842478750825	-0.1670218	-0.0462681	0.02422955
chr1:51546675	EPS15-AS1	+	0.7496477	0.6609274	0.08872026	10.28397	10.50869	8.183553e-07	0.000942149395087805	0.06962338	0.1078171	0.008627046
chr1:51615665	OSBPL9	-	0.4908047	0.6187351	-0.1279304	-5.042772	10.84036	0.000393641	0.0116890488168581	-0.1838678	-0.07199299	0.02536906
chr1:52456398	TUT4	+	0.5739856	0.4480093	0.1259763	4.151942	5.871822	0.006286376	0.0488356316400427	0.05133861	0.200614	0.03034154
chr1:52959865	SCP2	-	0.5975272	0.6895909	-0.09206367	-9.966867	10.94408	7.966312e-07	0.000935990074095674	-0.1124068	-0.07172055	0.009236972
chr1:53563834	GLIS1	+	0.3914751	0.3008298	0.09064529	5.132181	9.388578	0.0005406245	0.0135508514157964	0.05094142	0.1303492	0.01766214
chr1:53563886	GLIS1	+	0.3775937	0.2772816	0.1003121	9.554578	10.91763	1.23334e-06	0.00110582956912325	0.077183	0.1234412	0.01049885
chr1:53563908	GLIS1	+	0.4737812	0.3308572	0.142924	6.560069	9.399995	8.515972e-05	0.00595861983380268	0.09395629	0.1918916	0.02178696
chr1:55464138	AL603840.1	-	0.6053571	0.6875949	-0.08223772	-3.746339	9.180313	0.004422485	0.0401737947575921	-0.1317472	-0.03272828	0.02195149
chr1:55759705	AL603840.1	+	0.60764	0.6950406	-0.08740059	-5.276594	10.54161	0.0003015458	0.0103455086405338	-0.1240517	-0.0507495	0.01656383
chr1:55808247	AL603840.1	+	0.5502763	0.7913399	-0.2410636	-14.58638	10.70073	2.111924e-08	0.000152066070585714	-0.2775629	-0.2045642	0.01652662
chr1:5589502	AL365255.1	+	0.443497186875182	0.524852452029086	-0.0813552651539041	-4.05428526213858	10.9255500808523	0.00192783726576576	0.0256587405743181	-0.125558053495297	-0.0371524768125113	0.0200664876528669
chr1:55896523	LINC01755	-	0.6167528	0.7232604	-0.1065077	-6.516026	7.138518	0.0003028502	0.010361863581083	-0.1450071	-0.06800822	0.01634549
chr1:55896523	AL603840.1	-	0.6167528	0.7232604	-0.1065077	-6.516026	7.138518	0.0003028502	0.010361863581083	-0.1450071	-0.06800822	0.01634549
chr1:55952336	AL603840.1	+	0.6218894	0.7258033	-0.1039139	-5.41658	6.540391	0.00123884	0.0203863714136468	-0.1499321	-0.05789568	0.01918441
chr1:5603798	AL365255.1	-	0.59891589725286	0.679634272291292	-0.0807183750384319	-5.877477288239	10.7120809553767	0.000118460097232036	0.00682038026701208	-0.111045039737506	-0.0503917103393581	0.013733506924808
chr1:5608694	AL365255.1	-	0.467373005416484	0.566003869722893	-0.0986308643064088	-4.15137338748042	8.45254299257278	0.00284113942261102	0.0315613327320749	-0.152911916873638	-0.0443498117391792	0.0237586107296098
chr1:56168013	AC119674.1	+	0.6275695	0.7401138	-0.1125444	-3.900877	8.859232	0.003725812	0.0366011882308228	-0.1779684	-0.04712034	0.02885104
chr1:56173945	AC119674.1	-	0.594166	0.7012183	-0.1070522	-7.70059	9.27353	2.531693e-05	0.00364427749271152	-0.1383595	-0.07574497	0.01390182
chr1:56173945	AC119674.2	-	0.594166	0.7012183	-0.1070522	-7.70059	9.27353	2.531693e-05	0.00364427749271152	-0.1383595	-0.07574497	0.01390182
chr1:56247865	AC119674.1	+	0.5357452	0.6216698	-0.08592464	-3.779111	10.98091	0.003060999	0.0328609163146965	-0.1359785	-0.03587081	0.02273674
chr1:56247865	AC119674.2	+	0.5357452	0.6216698	-0.08592464	-3.779111	10.98091	0.003060999	0.0328609163146965	-0.1359785	-0.03587081	0.02273674
chr1:56351812	AC119674.1	-	0.5969353	0.694128	-0.09719275	-5.896658	10.88004	0.0001082902	0.00658095181433	-0.1335198	-0.06086574	0.01648269
chr1:56351812	AC119674.2	-	0.5969353	0.694128	-0.09719275	-5.896658	10.88004	0.0001082902	0.00658095181433	-0.1335198	-0.06086574	0.01648269
chr1:56352012	AC119674.1	-	0.6066722	0.7104751	-0.1038029	-8.201534	10.30433	7.831264e-06	0.00233325638137284	-0.1318909	-0.07571492	0.01265652
chr1:56352012	AC119674.2	-	0.6066722	0.7104751	-0.1038029	-8.201534	10.30433	7.831264e-06	0.00233325638137284	-0.1318909	-0.07571492	0.01265652
chr1:56470300	AC119674.1	-	0.4862745	0.5718219	-0.08554741	-3.737606	7.818131	0.00596629	0.0474379155067434	-0.1385424	-0.03255243	0.02288829
chr1:56470300	AC119674.2	-	0.4862745	0.5718219	-0.08554741	-3.737606	7.818131	0.00596629	0.0474379155067434	-0.1385424	-0.03255243	0.02288829
chr1:56590092	PLPP3	+	0.6211245	0.7557642	-0.1346397	-7.054167	10.25684	3.052259e-05	0.00392595840223296	-0.1770232	-0.09225609	0.01908654
chr1:56596395	PLPP3	-	0.4152386	0.5284156	-0.113177	-5.625279	10.86532	0.0001616284	0.00779140975775379	-0.1575265	-0.06882754	0.02011936
chr1:56757895	FYB2	-	0.5922637	0.7197233	-0.1274596	-9.28464	10.96868	1.577574e-06	0.00121660265518033	-0.1576852	-0.0972339	0.013728
chr1:56763685	FYB2	-	0.6051548	0.6869133	-0.08175849	-3.998985	7.563158	0.004435546	0.0402401195899974	-0.1293825	-0.03413444	0.02044481
chr1:56860779	C8A	+	0.6208644	0.7044432	-0.08357881	-4.764866	9.449208	0.000893138	0.0173188541338829	-0.1229728	-0.04418481	0.01754064
chr1:57652626	DAB1	-	0.5577483	0.6564574	-0.09870916	-4.093447	8.187965	0.003301995	0.0342290144382336	-0.1540946	-0.04332372	0.02411394
chr1:57687852	DAB1	+	0.5416318	0.6429807	-0.1013489	-11.32784	10.4046	3.506102e-07	0.000698878046545198	-0.1211792	-0.08151858	0.008946889
chr1:57708978	DAB1	-	0.45888	0.5437443	-0.08486432	-4.474407	7.674692	0.002296416	0.0281510632736875	-0.1289262	-0.04080244	0.01896661
chr1:57715813	DAB1	+	0.6158432	0.6978975	-0.08205429	-4.424233	9.108859	0.001613016	0.0233779149497813	-0.1239332	-0.04017537	0.01854656
chr1:57922540	DAB1	+	0.5935488	0.677453	-0.08390417	-5.62148	10.72972	0.0001702966	0.00797410125775759	-0.1168565	-0.05095182	0.01492564
chr1:57922562	DAB1	+	0.5639096	0.6762447	-0.1123351	-7.271368	9.629321	3.293677e-05	0.00405608995829698	-0.146938	-0.0777322	0.01544896
chr1:58195273	DAB1	+	0.6497136	0.7589946	-0.109281	-3.561035	10.99615	0.004467126	0.0403965570217606	-0.1768277	-0.04173429	0.03068799
chr1:58335167	DAB1	+	0.6121681	0.7000662	-0.08789806	-6.626263	9.021807	9.52511e-05	0.00622914828067655	-0.1178948	-0.05790136	0.0132651
chr1:58414713	DAB1	+	0.5228099	0.6260586	-0.1032487	-6.035225	10.12807	0.0001196067	0.0068388845113443	-0.1413017	-0.06519562	0.01710767
chr1:59252127	AC093425.1	+	0.5353132	0.6439567	-0.1086435	-5.614414	10.57853	0.0001813461	0.00818811106417557	-0.1514423	-0.06584468	0.01935082
chr1:5955277	NPHP4	+	0.493217309006783	0.603289937186996	-0.110072628180213	-4.4509539287793	10.9990829093308	0.000977351840103945	0.0180959215368725	-0.164503810705586	-0.0556414456548403	0.0247301207654606
chr1:59993153	C1orf87	+	0.5985937	0.6871586	-0.08856491	-4.873376	8.529126	0.001026931	0.0185651080688136	-0.1300242	-0.04710565	0.01817322
chr1:60556010	LINC01748	-	0.5674864	0.6662394	-0.09875294	-6.568552	10.08678	6.072654e-05	0.00516733279881928	-0.1322122	-0.06529367	0.0150342
chr1:60598909	LINC01748	+	0.6105952	0.7031877	-0.09259254	-4.810735	8.449111	0.001146512	0.0196147472654432	-0.136569	-0.04861605	0.01924706
chr1:60603912	LINC01748	+	0.5818424	0.740162	-0.1583197	-11.41989	8.756046	1.481841e-06	0.00118957778616041	-0.1898148	-0.1268245	0.0138635
chr1:60630862	LINC01748	-	0.5878679	0.6862572	-0.09838937	-3.938611	9.558258	0.003035262	0.0327090272047954	-0.1544006	-0.04237817	0.02498073
chr1:60880971	NFIA	+	0.5911234	0.6816024	-0.09047901	-5.599466	10.56838	0.0001859704	0.00829187559737142	-0.1262217	-0.05473636	0.01615851
chr1:61028800	NFIA-AS2	-	0.7098175	0.6150345	0.09478304	5.014029	8.361774	0.0009055746	0.0174396204489779	0.05151744	0.1380486	0.01890357
chr1:61028800	NFIA	-	0.7098175	0.6150345	0.09478304	5.014029	8.361774	0.0009055746	0.0174396204489779	0.05151744	0.1380486	0.01890357
chr1:6175711	AL031847.2	+	0.654004803675856	0.748115832216199	-0.094111028540343	-9.14748118988271	9.57501900379826	4.86227513861243e-06	0.00191782644909714	-0.117173209972227	-0.0710488471084594	0.0102881904413678
chr1:6175711	CHD5	+	0.654004803675856	0.748115832216199	-0.094111028540343	-9.14748118988271	9.57501900379826	4.86227513861243e-06	0.00191782644909714	-0.117173209972227	-0.0710488471084594	0.0102881904413678
chr1:6175715	AL031847.2	+	0.651075131009342	0.745665868226844	-0.0945907372175023	-11.8117616315336	10.6152647379672	1.92941922216746e-07	0.000538959345375486	-0.11229488195906	-0.0768865924759442	0.00800818202807072
chr1:6175715	CHD5	+	0.651075131009342	0.745665868226844	-0.0945907372175023	-11.8117616315336	10.6152647379672	1.92941922216746e-07	0.000538959345375486	-0.11229488195906	-0.0768865924759442	0.00800818202807072
chr1:62200750	L1TD1	-	0.5897228	0.6918991	-0.1021763	-4.317834	10.4762	0.001363656	0.0214160246057288	-0.1545795	-0.04977318	0.02366379
chr1:62587376	DOCK7	+	0.5517525	0.6355365	-0.08378404	-5.388949	10.99187	0.0002208971	0.00895384300723764	-0.1180067	-0.0495614	0.01554738
chr1:63855405	ROR1	-	0.610826	0.696435	-0.08560906	-3.920138	9.526005	0.003145383	0.0333467401845759	-0.134598	-0.03662016	0.02183828
chr1:65275185	DNAJC6	-	0.5947428	0.6861993	-0.09145651	-5.080945	10.95105	0.0003594219	0.0112251337703151	-0.1310956	-0.05181738	0.0179999
chr1:65292388	AL139294.1	-	0.5834402	0.6730019	-0.08956179	-6.788246	6.88356	0.0002757282	0.00993836994467998	-0.1208671	-0.05825645	0.01319366
chr1:65292388	DNAJC6	-	0.5834402	0.6730019	-0.08956179	-6.788246	6.88356	0.0002757282	0.00993836994467998	-0.1208671	-0.05825645	0.01319366
chr1:65519174	LEPR	-	0.5827707	0.6670707	-0.08430002	-3.800471	7.143931	0.006460006	0.049603659562989	-0.1365374	-0.03206265	0.02218147
chr1:65630871	LEPR	-	0.6054293	0.7005231	-0.09509377	-5.130034	8.834529	0.0006568005	0.0148372290395685	-0.1371467	-0.05304087	0.01853667
chr1:65630943	LEPR	-	0.5514202	0.6345182	-0.08309795	-4.215808	6.117757	0.005350095	0.0446826194949166	-0.131105	-0.03509092	0.01971104
chr1:65854410	PDE4B	-	0.5782298	0.6830884	-0.1048586	-9.584799	9.527311	3.358622e-06	0.00161953675706382	-0.1293996	-0.08031762	0.01094009
chr1:65894579	PDE4B	+	0.5517853	0.6822232	-0.1304379	-5.591767	10.52975	0.0001906034	0.00837680069709143	-0.182061	-0.07881489	0.02332678
chr1:65942188	PDE4B	-	0.5767554	0.6702786	-0.09352326	-8.21591	7.830078	4.080833e-05	0.0044050460363393	-0.1198724	-0.06717409	0.01138319
chr1:66122100	PDE4B	-	0.5611066	0.6478006	-0.08669403	-5.999765	9.347966	0.000173833	0.00804459533456847	-0.1191967	-0.05419137	0.01444957
chr1:66749519	SGIP1	-	0.5880586	0.6811237	-0.09306515	-4.339337	9.422465	0.00168728	0.0239543653863952	-0.1412517	-0.04487855	0.02144686
chr1:67849619	GNG12-AS1	+	0.4731174	0.5564425	-0.08332507	-6.181646	10.28815	9.200418e-05	0.0061275478578858	-0.1132455	-0.05340466	0.01347943
chr1:6790914	CAMTA1	-	0.567599057166726	0.650610138653617	-0.0830110814868906	-6.24169084032753	6.34960756049043	0.000629026478979577	0.0145273076163803	-0.115124235293394	-0.0508979276803874	0.0132994542040686
chr1:68151670	GNG12-AS1	+	0.6165652	0.7101898	-0.09362455	-4.14139	10.9956	0.001641559	0.0236083050028534	-0.1433847	-0.04386437	0.02260704
chr1:68151670	WLS	+	0.6165652	0.7101898	-0.09362455	-4.14139	10.9956	0.001641559	0.0236083050028534	-0.1433847	-0.04386437	0.02260704
chr1:68503834	DEPDC1-AS1	+	0.6563456	0.7456634	-0.08931775	-3.735122	10.99437	0.00329685	0.0342039746272881	-0.1419531	-0.03668243	0.02391294
chr1:68515294	DEPDC1-AS1	-	0.5788179	0.6621923	-0.08337433	-3.405089	10.71431	0.006093942	0.047989495710842	-0.1374418	-0.02930691	0.02448521
chr1:68736894	AL033530.1	-	0.5638151	0.6461851	-0.08236995	-3.934401	10.99013	0.002338336	0.0284283820637136	-0.1284545	-0.03628545	0.02093583
chr1:69140845	LINC01707	+	0.5099753	0.6271059	-0.1171305	-5.012382	10.5382	0.0004498102	0.0124201420561314	-0.16884	-0.06542105	0.02336824
chr1:69156179	LINC01707	-	0.5998485	0.6853293	-0.08548087	-4.042359	8.848459	0.003022134	0.0326303551538544	-0.1334423	-0.03751948	0.02114628
chr1:69718367	LRRC7	+	0.5157973	0.6016881	-0.08589085	-4.62803	10.72783	0.0007804349	0.0161828439806494	-0.1268654	-0.04491633	0.01855883
chr1:69735781	LRRC7	-	0.431253	0.5146451	-0.08339209	-3.637049	8.153301	0.006407251	0.0493659503126604	-0.1360928	-0.03069141	0.02292851
chr1:69804128	LRRC7	-	0.5639553	0.6530894	-0.08913407	-4.954978	10.73746	0.0004644871	0.0126070603434303	-0.1288456	-0.04942257	0.01798879
chr1:69882061	LRRC7	+	0.6321085	0.7351904	-0.1030819	-7.010367	10.96295	2.279019e-05	0.00349486577876846	-0.1354591	-0.07070484	0.01470422
chr1:69918532	LRRC7	+	0.5753689	0.6637427	-0.08837382	-3.498979	10.19588	0.005571788	0.0457099348398498	-0.1445038	-0.03224385	0.02525703
chr1:69960445	LRRC7	-	0.5987197	0.7027924	-0.1040727	-5.217428	10.39356	0.0003450142	0.0110155239589611	-0.1482906	-0.0598548	0.01994713
chr1:70100569	LRRC7	-	0.5448774	0.6552332	-0.1103558	-6.130592	8.789263	0.0001905137	0.00837537441277802	-0.1512258	-0.06948576	0.01800084
chr1:70169507	LRRC40	+	0.6320855	0.7257703	-0.09368482	-4.359298	7.277817	0.00302421	0.0326427696538379	-0.1441119	-0.04325776	0.0214908
chr1:70760480	LINC01788	-	0.5106947	0.6220041	-0.1113093	-6.230335	9.358303	0.0001297188	0.00708448583716431	-0.1514897	-0.07112895	0.01786571
chr1:70951942	PTGER3	+	0.3861723	0.5502701	-0.1640978	-3.841989	7.401136	0.005717608	0.0463466794009328	-0.2639957	-0.06419989	0.04271168
chr1:71000767	PTGER3	+	0.629245	0.7145344	-0.08528941	-5.535645	9.068341	0.0003534375	0.0111313519694711	-0.1201032	-0.05047565	0.01540731
chr1:71023802	PTGER3	-	0.6575133	0.7498982	-0.09238498	-4.636664	10.92975	0.000732807	0.0156809275668668	-0.1362738	-0.0484962	0.01992488
chr1:71223379	ZRANB2-AS2	-	0.5629522	0.6451601	-0.08220799	-3.83124	10.10016	0.003252581	0.0339637592330857	-0.1299536	-0.03446238	0.02145728
chr1:71355351	ZRANB2-AS2	-	0.5400693	0.6263559	-0.08628664	-3.624934	10.17696	0.004521206	0.0406485714156665	-0.1391997	-0.03337355	0.02380365
chr1:71474862	NEGR1	+	0.6011376	0.6899404	-0.08880277	-3.945228	10.98197	0.002298548	0.0281625211484234	-0.1383545	-0.03925107	0.02250891
chr1:71474862	ZRANB2-AS2	+	0.6011376	0.6899404	-0.08880277	-3.945228	10.98197	0.002298548	0.0281625211484234	-0.1383545	-0.03925107	0.02250891
chr1:71504043	NEGR1	+	0.5221477	0.6260162	-0.1038685	-3.951909	9.166088	0.003226783	0.0338212072383138	-0.1631613	-0.04457578	0.02628313
chr1:71681693	NEGR1	-	0.5785547	0.6638912	-0.08533656	-4.153421	9.072105	0.002429397	0.0290029844856113	-0.1317588	-0.03891433	0.02054609
chr1:71689765	NEGR1	+	0.5713757	0.695479	-0.1241033	-4.768349	10.7639	0.0006183927	0.0144184355294905	-0.1815408	-0.06666574	0.02602647
chr1:71829689	NEGR1-IT1	+	0.6228688	0.7106841	-0.08781532	-6.425294	9.171994	0.0001117991	0.00666165795149033	-0.1186444	-0.05698628	0.01366713
chr1:71829689	NEGR1	+	0.6228688	0.7106841	-0.08781532	-6.425294	9.171994	0.0001117991	0.00666165795149033	-0.1186444	-0.05698628	0.01366713
chr1:72118845	NEGR1	-	0.591139	0.6781377	-0.08699863	-4.047442	10.80302	0.001995122	0.0261153801378274	-0.1344137	-0.03958361	0.02149472
chr1:72361900	AL513166.1	+	0.5721248	0.6537938	-0.08166906	-6.898317	7.921609	0.0001306785	0.00710856002721246	-0.1090169	-0.05432122	0.01183898
chr1:72438626	AL513166.1	-	0.552548	0.6361005	-0.08355257	-6.390378	9.725916	8.981473e-05	0.00607170118830715	-0.1127966	-0.05430855	0.01307474
chr1:72464108	AL513166.1	+	0.576665	0.6855882	-0.1089232	-5.361053	8.580425	0.0005352974	0.013489681827399	-0.1552294	-0.06261691	0.02031749
chr1:72505630	AL513166.1	-	0.5031613	0.6046473	-0.101486	-4.232559	9.525377	0.00193579	0.0257170512407041	-0.1552742	-0.04769788	0.02397747
chr1:72596904	AL513166.1	+	0.6562334	0.7377888	-0.08155544	-4.141385	10.60824	0.001770686	0.0245610692923416	-0.1250951	-0.0380158	0.01969279
chr1:72826415	LINC02797	+	0.6223278	0.7074228	-0.08509495	-4.683729	10.90675	0.0006829415	0.0151300563672255	-0.1251247	-0.04506525	0.01816821
chr1:72826415	AL583808.1	+	0.6223278	0.7074228	-0.08509495	-4.683729	10.90675	0.0006829415	0.0151300563672255	-0.1251247	-0.04506525	0.01816821
chr1:73314382	LINC01360	+	0.6020009	0.7022169	-0.1002161	-10.39429	10.04756	1.071382e-06	0.0010467584247931	-0.1216848	-0.07874734	0.009641458
chr1:73342302	LINC01360	+	0.5224177	0.6126279	-0.09021019	-3.613029	10.8993	0.004135396	0.0387378055789935	-0.1452264	-0.03519393	0.02496802
chr1:73816234	AL591463.1	+	0.6582936	0.7828042	-0.1245107	-4.913881	10.43479	0.0005386321	0.0135286693060865	-0.1806512	-0.06837009	0.02533856
chr1:73840138	AL591463.1	+	0.3943524	0.5076797	-0.1133274	-5.416325	10.18696	0.0002761806	0.00994463981565386	-0.1598317	-0.06682309	0.0209233
chr1:73897763	AL591463.1	+	0.4238732	0.5115784	-0.0877052	-4.548144	9.313575	0.001272945	0.0206924984843354	-0.1311052	-0.04430522	0.01928374
chr1:73898763	AL591463.1	+	0.5832029	0.6637432	-0.08054033	-6.035627	10.7306	9.40586e-05	0.00619190598106167	-0.1100008	-0.05107983	0.01334415
chr1:74033012	LRRIQ3	+	0.4459196	0.5480392	-0.1021196	-3.653747	9.798226	0.004586748	0.0409739074702181	-0.1645687	-0.03967044	0.02794928
chr1:74041583	LRRIQ3	-	0.5262667	0.6421935	-0.1159268	-10.55097	10.93538	4.540834e-07	0.000762811524843529	-0.1401271	-0.09172645	0.01098731
chr1:74113451	LRRIQ3	+	0.5317716	0.6230024	-0.09123079	-6.289758	7.667123	0.0002810133	0.0100375400072383	-0.1249331	-0.05752852	0.01450466
chr1:74113501	LRRIQ3	+	0.5355268	0.6196068	-0.08407999	-4.622544	8.808169	0.001322872	0.0211058397562685	-0.1253636	-0.04279634	0.01818912
chr1:74213744	FPGT-TNNI3K	-	0.5579539	0.6670518	-0.1090979	-9.913778	10.23629	1.432836e-06	0.00117565026844186	-0.1335413	-0.08465444	0.01100467
chr1:74213744	FPGT	-	0.5579539	0.6670518	-0.1090979	-9.913778	10.23629	1.432836e-06	0.00117565026844186	-0.1335413	-0.08465444	0.01100467
chr1:74287195	TNNI3K	+	0.558935	0.649005	-0.09007002	-4.576115	10.1828	0.0009702271	0.0180278520120201	-0.1338192	-0.04632085	0.01968264
chr1:74287195	FPGT-TNNI3K	+	0.558935	0.649005	-0.09007002	-4.576115	10.1828	0.0009702271	0.0180278520120201	-0.1338192	-0.04632085	0.01968264
chr1:74288123	FPGT-TNNI3K	+	0.6286719	0.7204507	-0.09177878	-7.862833	10.2302	1.195292e-05	0.00271944633991299	-0.1177076	-0.06584998	0.01167248
chr1:74288123	TNNI3K	+	0.6286719	0.7204507	-0.09177878	-7.862833	10.2302	1.195292e-05	0.00271944633991299	-0.1177076	-0.06584998	0.01167248
chr1:74294067	FPGT-TNNI3K	-	0.5737188	0.6755054	-0.1017865	-5.972405	10.77333	0.0001011572	0.00640588466864012	-0.139394	-0.06417907	0.01704281
chr1:74294067	TNNI3K	-	0.5737188	0.6755054	-0.1017865	-5.972405	10.77333	0.0001011572	0.00640588466864012	-0.139394	-0.06417907	0.01704281
chr1:74360429	AC093158.1	-	0.5042017	0.6424189	-0.1382172	-4.302806	8.201463	0.002459479	0.0291983994105623	-0.2119765	-0.06445796	0.03212259
chr1:74360429	FPGT-TNNI3K	-	0.5042017	0.6424189	-0.1382172	-4.302806	8.201463	0.002459479	0.0291983994105623	-0.2119765	-0.06445796	0.03212259
chr1:74360429	TNNI3K	-	0.5042017	0.6424189	-0.1382172	-4.302806	8.201463	0.002459479	0.0291983994105623	-0.2119765	-0.06445796	0.03212259
chr1:74442374	FPGT-TNNI3K	-	0.5720725	0.6557761	-0.08370356	-6.7306	9.496507	6.62335e-05	0.00536709643689711	-0.1116137	-0.05579338	0.01243627
chr1:74442374	TNNI3K	-	0.5720725	0.6557761	-0.08370356	-6.7306	9.496507	6.62335e-05	0.00536709643689711	-0.1116137	-0.05579338	0.01243627
chr1:74452386	FPGT-TNNI3K	-	0.6099734	0.6954745	-0.08550112	-4.479725	10.70184	0.0009971715	0.0182803993406292	-0.1276529	-0.04334935	0.01908624
chr1:74452386	TNNI3K	-	0.6099734	0.6954745	-0.08550112	-4.479725	10.70184	0.0009971715	0.0182803993406292	-0.1276529	-0.04334935	0.01908624
chr1:74499909	LRRC53	-	0.5718951	0.6623535	-0.09045836	-5.488169	10.99586	0.0001898417	0.00836511477329212	-0.1267376	-0.05417911	0.01648243
chr1:74499909	FPGT-TNNI3K	-	0.5718951	0.6623535	-0.09045836	-5.488169	10.99586	0.0001898417	0.00836511477329212	-0.1267376	-0.05417911	0.01648243
chr1:74499909	TNNI3K	-	0.5718951	0.6623535	-0.09045836	-5.488169	10.99586	0.0001898417	0.00836511477329212	-0.1267376	-0.05417911	0.01648243
chr1:74501404	FPGT-TNNI3K	-	0.4476858	0.5450593	-0.09737354	-5.543391	10.39757	0.0002140033	0.00882727647135676	-0.1363104	-0.05843663	0.0175657
chr1:74501404	LRRC53	-	0.4476858	0.5450593	-0.09737354	-5.543391	10.39757	0.0002140033	0.00882727647135676	-0.1363104	-0.05843663	0.0175657
chr1:74501404	TNNI3K	-	0.4476858	0.5450593	-0.09737354	-5.543391	10.39757	0.0002140033	0.00882727647135676	-0.1363104	-0.05843663	0.0175657
chr1:74610573	ERICH3-AS1	-	0.5455425	0.643254	-0.09771143	-6.119421	10.39231	9.584885e-05	0.00624797258842956	-0.1331079	-0.06231499	0.01596743
chr1:74610573	ERICH3	-	0.5455425	0.643254	-0.09771143	-6.119421	10.39231	9.584885e-05	0.00624797258842956	-0.1331079	-0.06231499	0.01596743
chr1:74618182	ERICH3	+	0.5542154	0.638781	-0.08456564	-4.668945	5.785591	0.003775932	0.0368657430924675	-0.1292862	-0.03984508	0.01811237
chr1:74618182	ERICH3-AS1	+	0.5542154	0.638781	-0.08456564	-4.668945	5.785591	0.003775932	0.0368657430924675	-0.1292862	-0.03984508	0.01811237
chr1:75526908	SLC44A5	+	0.5919553	0.6806162	-0.08866095	-5.12089	9.558802	0.0005189573	0.0132950123959301	-0.1274807	-0.04984117	0.01731358
chr1:75608799	SLC44A5	-	0.4708173	0.5688691	-0.09805176	-4.676569	10.5548	0.0007543521	0.0158960156165079	-0.1444375	-0.05166598	0.0209666
chr1:75677676	AL137803.1	+	0.5259545	0.6257955	-0.09984098	-4.608412	10.1592	0.0009284258	0.0176465923066128	-0.1480111	-0.05167082	0.02166494
chr1:75678938	AL137803.1	+	0.6530142	0.758	-0.1049857	-13.6735	10.94863	3.169028e-08	0.00019099825765	-0.1218947	-0.08807677	0.007678044
chr1:75851473	MSH4	-	0.6520266	0.7691884	-0.1171618	-9.724163	10.75961	1.163424e-06	0.00108591626222222	-0.1437529	-0.0905707	0.01204852
chr1:75954390	AC092813.1	-	0.5330913	0.6365031	-0.1034119	-4.694974	10.14364	0.0008158986	0.0165395905832112	-0.152395	-0.05442876	0.02202608
chr1:76248823	ST6GALNAC3	-	0.5993813	0.6810556	-0.08167426	-3.579734	10.92727	0.004365154	0.0398711450900924	-0.1319322	-0.03141635	0.02281574
chr1:76397743	ST6GALNAC3	-	0.585252	0.6728518	-0.08759973	-4.101026	8.585833	0.002953351	0.0322389132898889	-0.1362781	-0.03892139	0.02136044
chr1:77072481	AL035409.2	-	0.5659694	0.6838946	-0.1179252	-7.152974	7.780723	0.0001110168	0.00663875759898305	-0.1561297	-0.0797207	0.01648618
chr1:77857007	MIGA1	-	0.5667381	0.6637738	-0.09703571	-5.039856	6.884061	0.001573052	0.0230620711811514	-0.1427193	-0.05135212	0.01925367
chr1:78470647	PTGFR	+	0.5979909	0.6895676	-0.09157672	-4.624479	7.923835	0.001743591	0.0243553237015262	-0.1373181	-0.04583532	0.01980261
chr1:78982036	ADGRL4	-	0.5236393	0.6465726	-0.1229333	-7.048183	9.813466	3.863466e-05	0.00431368306324692	-0.1618965	-0.08397008	0.01744184
chr1:79001280	ADGRL4	+	0.578385	0.6586737	-0.08028866	-3.37117	10.98691	0.006249322	0.0486677960188282	-0.1327155	-0.0278618	0.02381626
chr1:79032400	ADGRL4	+	0.5180572	0.7681401	-0.2500829	-4.565519	10.89354	0.0008296696	0.0166674422262206	-0.370789	-0.1293769	0.05477645
chr1:79032408	ADGRL4	+	0.6110483	0.6932998	-0.08225149	-4.355023	9.650627	0.001557409	0.0229435160017954	-0.1245408	-0.03996215	0.01888658
chr1:79033411	ADGRL4	+	0.5677518	0.6525409	-0.08478909	-4.706317	10.43226	0.0007429972	0.0157841049259995	-0.124707	-0.04487121	0.01801602
chr1:79069307	ADGRL4	+	0.5927105	0.7126464	-0.1199359	-5.868084	7.388572	0.0005063511	0.0131340633160013	-0.1677552	-0.07211661	0.02043869
chr1:79980916	AC099671.1	-	0.6432995	0.7307448	-0.08744529	-6.83362	10.98793	2.84052e-05	0.00381143494231135	-0.1156136	-0.05927697	0.01279634
chr1:80009975	AC099671.1	-	0.5356257	0.6504881	-0.1148623	-6.814684	10.97785	2.926195e-05	0.00385651467411765	-0.1519693	-0.07775532	0.01685512
chr1:80586372	LINC01781	+	0.5355589	0.6179171	-0.08235824	-4.042134	8.06845	0.003659352	0.0362175556625898	-0.1292736	-0.03544283	0.02037494
chr1:80644138	LINC01781	-	0.5406272	0.6332808	-0.09265366	-5.611662	8.27478	0.0004460531	0.0123747593540741	-0.1305089	-0.05479839	0.01651091
chr1:81319045	ADGRL2	-	0.5984728	0.6950383	-0.09656547	-6.841836	8.817168	8.326167e-05	0.00589291359182046	-0.1285947	-0.06453625	0.01411397
chr1:81380392	ADGRL2	-	0.6102457	0.6936943	-0.08344861	-3.833766	10.49409	0.003021796	0.032628902735647	-0.1316402	-0.03525702	0.02176675
chr1:81536586	AL138799.4	-	0.6306196	0.7134799	-0.08286029	-3.66469	9.726656	0.004560905	0.0408329619862597	-0.1334321	-0.03228849	0.02261045
chr1:81536586	ADGRL2	-	0.6306196	0.7134799	-0.08286029	-3.66469	9.726656	0.004560905	0.0408329619862597	-0.1334321	-0.03228849	0.02261045
chr1:81562937	ADGRL2	-	0.5586608	0.6504085	-0.09174772	-4.388047	7.178707	0.003014951	0.0325956816339554	-0.1409402	-0.04255526	0.02090855
chr1:81642226	ADGRL2	+	0.7591442	0.6703728	0.08877139	6.762134	10.74369	3.492017e-05	0.00415882363172769	0.05979316	0.1177496	0.01312772
chr1:81943923	ADGRL2	-	0.4680119	0.5872656	-0.1192538	-4.785972	10.13038	0.0007127064	0.0154541393907292	-0.1746764	-0.06383113	0.02491736
chr1:82281953	AL157944.1	+	0.5467044	0.6410993	-0.09439489	-3.793054	7.397849	0.006113271	0.0480847771564639	-0.152606	-0.03618376	0.02488625
chr1:82563943	AL157944.1	-	0.6034898	0.6863093	-0.08281949	-4.394849	9.531152	0.001510048	0.0225763132586127	-0.1250897	-0.04054928	0.01884467
chr1:82758879	AL157944.1	-	0.5678517	0.7070279	-0.1391762	-6.674793	8.236521	0.0001372633	0.00726724104858193	-0.1870195	-0.09133298	0.02085102
chr1:82965111	LINC01362	-	0.5996254	0.6964505	-0.09682507	-10.55663	10.17709	8.335871e-07	0.000946528821764045	-0.1172134	-0.07643675	0.009171971
chr1:83015395	LINC01362	-	0.6079531	0.6985216	-0.09056853	-6.882372	10.64622	3.127233e-05	0.00397457683349243	-0.1196502	-0.06148682	0.01315949
chr1:83603460	LINC01725	+	0.5856937	0.6909414	-0.1052477	-5.224916	8.663856	0.0006172006	0.0144020616858796	-0.1510863	-0.0594092	0.02014343
chr1:83687363	LINC01725	-	0.6062253	0.7512071	-0.1449818	-3.709077	10.96177	0.003466769	0.0351539127228114	-0.2310514	-0.05891223	0.03908838
chr1:84158379	PRKACB	-	0.647606	0.7862212	-0.1386152	-11.63291	10.58859	2.298353e-07	0.000585392003919065	-0.1649665	-0.1122639	0.01191578
chr1:84226525	PRKACB	-	0.6791423	0.5809461	0.09819615	4.757194	9.558853	0.0008746813	0.0171465129760959	0.05191443	0.1444779	0.02064161
chr1:84233946	PRKACB	-	0.4978235	0.5918313	-0.09400786	-4.592959	10.85901	0.0008000302	0.0163768850438604	-0.1391287	-0.04888702	0.02046782
chr1:84395063	UOX	+	0.6514271	0.738725	-0.08729796	-24.44521	10.36035	1.682249e-10	1.05518805608125e-05	-0.09521766	-0.07937825	0.003571169
chr1:84540526	SPATA1	-	0.5651291	0.67816	-0.1130308	-7.469503	8.142173	6.503356e-05	0.00531810825247422	-0.1478202	-0.07824143	0.01513231
chr1:84540526	AL359762.3	-	0.5651291	0.67816	-0.1130308	-7.469503	8.142173	6.503356e-05	0.00531810825247422	-0.1478202	-0.07824143	0.01513231
chr1:84655031	SSX2IP	+	0.5614653	0.4702669	0.09119844	4.084436	7.085295	0.004545016	0.0407626320592796	0.03852902	0.1438679	0.02232828
chr1:84879084	LPAR3	-	0.5271335	0.6220389	-0.09490544	-5.544257	10.99998	0.0001742533	0.0080560327160781	-0.1325814	-0.05722943	0.01711779
chr1:85564485	AC092807.4	+	0.541677	0.6760898	-0.1344128	-5.711643	10.88429	0.0001414302	0.00736579346222796	-0.1862762	-0.0825495	0.02353313
chr1:85564485	DDAH1	+	0.541677	0.6760898	-0.1344128	-5.711643	10.88429	0.0001414302	0.00736579346222796	-0.1862762	-0.0825495	0.02353313
chr1:85736085	COL24A1	+	0.5967054	0.7139291	-0.1172237	-5.707504	7.84333	0.000484206	0.0128569219495767	-0.1647509	-0.06969663	0.02053853
chr1:85849948	COL24A1	+	0.541846	0.6249569	-0.08311091	-5.037604	10.34642	0.000457938	0.012518385334134	-0.1197048	-0.046517	0.0164981
chr1:85861726	COL24A1	-	0.5258662	0.6179623	-0.09209604	-3.52639	10.83603	0.004852571	0.0422987876439124	-0.1496838	-0.03450829	0.02611624
chr1:85897629	COL24A1	+	0.5726818	0.6926243	-0.1199425	-4.992149	10.93772	0.000414599	0.0119728080771434	-0.1728606	-0.06702436	0.02402622
chr1:85966757	COL24A1	+	0.5824091	0.6688795	-0.08647044	-3.984267	10.10113	0.00253233	0.0296585948239805	-0.1347621	-0.03817874	0.02170297
chr1:86073490	COL24A1	+	0.4882297	0.5861517	-0.097922	-6.082962	9.983818	0.0001191302	0.00683147686660978	-0.1337979	-0.0620461	0.01609775
chr1:86099200	COL24A1	+	0.6253036	0.7448052	-0.1195016	-10.73295	10.5208	5.360448e-07	0.000802861038074153	-0.1441445	-0.0948588	0.01113409
chr1:86104159	COL24A1	-	0.6583147	0.7494112	-0.09109652	-5.906034	5.918242	0.001100405	0.019221811124245	-0.1289652	-0.05322784	0.01542431
chr1:86142176	COL24A1	+	0.6118573	0.69447	-0.08261274	-3.487512	10.18733	0.005687861	0.0462187918494357	-0.135262	-0.0299635	0.02368816
chr1:86143348	COL24A1	+	0.5554959	0.6377757	-0.08227983	-3.798416	10.97801	0.002961761	0.0322814252492161	-0.1299684	-0.03459128	0.02166162
chr1:86293086	LINC02795	-	0.468288	0.6323682	-0.1640802	-4.695392	10.91576	0.0006687354	0.0149748680954557	-0.241066	-0.08709444	0.03494495
chr1:86294684	LINC02795	-	0.6006139	0.6843833	-0.08376937	-4.368914	10.13884	0.001356502	0.0213677279082305	-0.1264124	-0.0411263	0.01917396
chr1:86479492	CLCA1	+	0.5934076	0.6760654	-0.08265778	-10.95956	10.96992	3.011303e-07	0.000647829509879573	-0.09926331	-0.06605224	0.007542068
chr1:86658817	CLCA4-AS1	+	0.6253185	0.7352367	-0.1099183	-11.33913	10.02735	4.847644e-07	0.000773380738566591	-0.1315092	-0.08832732	0.009693713
chr1:86676825	CLCA4-AS1	+	0.5414643	0.6431176	-0.1016533	-5.15351	10.48448	0.0003690366	0.0113639845406502	-0.1453297	-0.05797685	0.01972506
chr1:87260764	LINC02801	+	0.6269346	0.7111928	-0.08425813	-5.927214	9.639591	0.0001686601	0.00794210675098432	-0.1160934	-0.05242283	0.01421547
chr1:87672056	PKN2-AS1	-	0.5283323	0.6116808	-0.08334857	-4.718944	10.24068	0.0007663117	0.0160216526866611	-0.1225782	-0.04411898	0.01766255
chr1:87725315	PKN2-AS1	+	0.6151868	0.7057615	-0.09057464	-8.268512	9.993365	8.845142e-06	0.00244446662426782	-0.1149842	-0.06616505	0.01095416
chr1:88002071	PKN2-AS1	+	0.6141941	0.7063131	-0.09211899	-4.594123	10.92785	0.0007855677	0.0162344139402402	-0.1362876	-0.04795039	0.02005148
chr1:88048462	PKN2-AS1	+	0.5370637	0.6308972	-0.09383352	-6.688623	8.710406	0.000104485	0.00650525659359845	-0.1257305	-0.06193655	0.01402882
chr1:88193474	PKN2-AS1	+	0.6082057	0.7708628	-0.1626572	-8.555264	10.93585	3.571612e-06	0.00166573559933576	-0.2045334	-0.1207809	0.01901253
chr1:88254692	PKN2-AS1	-	0.585454	0.7032424	-0.1177884	-5.282391	10.11182	0.0003434632	0.0109920964988888	-0.1673977	-0.06817902	0.0222983
chr1:88385233	PKN2-AS1	+	0.6326168	0.7196579	-0.0870411	-4.581111	7.843225	0.001894027	0.025418212436051	-0.1310081	-0.04307411	0.019
chr1:88417674	PKN2-AS1	+	0.5760214	0.6655275	-0.0895061	-8.188454	10.78647	5.935503e-06	0.00208580610528137	-0.1136228	-0.0653894	0.01093077
chr1:88419889	PKN2-AS1	+	0.5386138	0.6260063	-0.08739246	-9.397746	7.181079	2.734584e-05	0.00374627114795185	-0.1092699	-0.06551501	0.0092993
chr1:8843806	RERE	-	0.596613379659535	0.693558860118469	-0.0969454804589336	-7.17208136047411	10.7212628400726	2.08615567535039e-05	0.00338476778209607	-0.126790978952425	-0.0670999819654421	0.013517063678782
chr1:88589978	PKN2-AS1	+	0.5918567	0.6934915	-0.1016348	-5.779024	10.79076	0.0001325559	0.00714940278424029	-0.140435	-0.06283464	0.01758685
chr1:88633789	PKN2-AS1	-	0.5947406	0.6952502	-0.1005096	-5.978359	6.10153	0.0009245789	0.017608097595312	-0.1414823	-0.0595369	0.01681224
chr1:89434627	AL596214.1	-	0.5755825	0.6812594	-0.1056769	-4.016104	9.626496	0.002649076	0.0303837900022756	-0.1646164	-0.04673742	0.02631328
chr1:8973621	CA6	-	0.620632911150153	0.7068510043224	-0.0862180931722477	-5.0148149337656	9.5943503942353	0.000596347778002435	0.0141714486583768	-0.124746445043589	-0.047689741300906	0.0171926769603653
chr1:8973944	CA6	-	0.637940630797774	0.555226405935788	0.0827142248619855	6.05797491447082	5.91339157384293	0.000967624979946125	0.0180084413220172	0.0491856695047434	0.116242780219228	0.0136537747398729
chr1:90805331	LINC02609	-	0.5471136	0.6435201	-0.09640645	-4.449946	6.229721	0.003951808	0.0378006274404245	-0.1489476	-0.04386526	0.02166464
chr1:91341756	HFM1	+	0.6074758	0.7339685	-0.1264927	-6.821308	10.80279	3.144649e-05	0.00398029392183465	-0.1673984	-0.08558708	0.01854376
chr1:91842179	TGFBR3	+	0.6069507	0.7202976	-0.1133469	-6.153837	7.737157	0.0003124105	0.0104991008981288	-0.1560734	-0.07062037	0.0184189
chr1:91842258	TGFBR3	+	0.5571888	0.6419289	-0.08474012	-5.019459	7.828024	0.001096949	0.0191846395662734	-0.1238202	-0.04566004	0.01688232
chr1:92619655	EVI5	+	0.6089066	0.700319	-0.09141238	-3.389771	10.52476	0.006414883	0.0494022588147857	-0.1510953	-0.0317295	0.02696713
chr1:92683831	EVI5	+	0.5991602	0.6932543	-0.09409409	-7.708512	10.49152	1.228865e-05	0.00275194514839733	-0.1211202	-0.067068	0.01220652
chr1:92702603	EVI5	+	0.5781867	0.6633644	-0.08517772	-5.067933	10.18472	0.0004594554	0.0125418882467698	-0.1225346	-0.04782082	0.01680719
chr1:92708297	EVI5	+	0.5975445	0.6798979	-0.08235343	-4.822957	9.798129	0.0007408397	0.0157586718629458	-0.1205061	-0.04420077	0.0170753
chr1:92708348	EVI5	+	0.6127743	0.7009625	-0.08818818	-5.33841	7.026443	0.001064495	0.0188789151455176	-0.1272209	-0.04915541	0.01651956
chr1:93513115	FNBP1L	+	0.5949645	0.6896961	-0.09473158	-7.78316	9.215166	2.406931e-05	0.00357157986107023	-0.1221674	-0.06729576	0.01217135
chr1:93528266	FNBP1L	+	0.5813662	0.6710443	-0.08967802	-4.330567	8.039968	0.002480822	0.0293466133337245	-0.1373898	-0.04196624	0.02070815
chr1:93688473	BCAR3	-	0.5480751	0.6580104	-0.1099352	-7.384869	10.19368	2.119732e-05	0.00340202549596407	-0.1430193	-0.07685115	0.01488655
chr1:94027124	ABCA4	+	0.7136852	0.6168147	0.09687052	7.316215	7.153146	0.0001444129	0.00742166038970213	0.06569703	0.128044	0.01324052
chr1:94157635	ARHGAP29	-	0.5758498	0.6996776	-0.1238278	-7.542633	6.529747	0.0001871942	0.00831491749446053	-0.163222	-0.08443364	0.01641705
chr1:94193495	ARHGAP29	+	0.627447	0.7477869	-0.12034	-6.056125	10.73167	9.135485e-05	0.00610851696955842	-0.164209	-0.07647086	0.01987079
chr1:94193717	ARHGAP29	+	0.6009927	0.699356	-0.09836329	-4.661652	10.44863	0.0007934335	0.0163146897514853	-0.145106	-0.05162059	0.02110052
chr1:94219650	ARHGAP29	-	0.6214486	0.7183491	-0.09690056	-6.522471	10.21045	6.084718e-05	0.00516930963466306	-0.1299105	-0.06389064	0.01485642
chr1:94243840	ARHGAP29	+	0.5992911	0.709799	-0.1105079	-4.459362	8.842247	0.001649275	0.0236710294848978	-0.1667195	-0.05429635	0.02478111
chr1:94280714	ARHGAP29-AS1	+	0.6308929	0.7387425	-0.1078496	-4.389601	9.557035	0.001512213	0.0225957095875241	-0.1629393	-0.05275978	0.02456933
chr1:94748853	SLC44A3-AS1	+	0.617931	0.7199969	-0.1020658	-3.487158	10.57975	0.005382031	0.04483395049624	-0.1668002	-0.03733148	0.02926906
chr1:95055870	ALG14	+	0.7068027	0.6267847	0.08001803	5.234278	6.626326	0.001433514	0.0219794370385902	0.04345191	0.1165841	0.01528731
chr1:95183815	TLCD4-RWDD3	+	0.69793	0.5660467	0.1318833	3.471965	10.95301	0.005254177	0.0442225624107803	0.04823463	0.2155319	0.03798519
chr1:95183815	TLCD4	+	0.69793	0.5660467	0.1318833	3.471965	10.95301	0.005254177	0.0442225624107803	0.04823463	0.2155319	0.03798519
chr1:95183815	AC092802.2	+	0.69793	0.5660467	0.1318833	3.471965	10.95301	0.005254177	0.0442225624107803	0.04823463	0.2155319	0.03798519
chr1:95703510	LINC02607	+	0.5464774	0.6323953	-0.08591793	-4.507689	8.186092	0.001870226	0.0252650940672742	-0.1296978	-0.0421381	0.0190603
chr1:95952382	LINC02790	-	0.5499883	0.63772	-0.08773175	-3.895353	10.79874	0.002583525	0.029986440716753	-0.1374156	-0.03804787	0.02252216
chr1:95973685	LINC02790	-	0.5796178	0.6753756	-0.09575775	-4.311835	9.788037	0.001610403	0.0233578528971223	-0.1453862	-0.04612934	0.02220812
chr1:96264996	LINC01787	+	0.57197	0.6646482	-0.09267823	-5.084651	10.7193	0.0003820413	0.0115390177878781	-0.1329243	-0.0524322	0.01822706
chr1:96311500	LINC01787	-	0.6528199	0.7582272	-0.1054073	-4.142694	7.161713	0.004124191	0.0386816268746179	-0.1652988	-0.04551576	0.02544414
chr1:97359277	DPYD	+	0.5959059	0.6893474	-0.09344144	-4.652381	10.96278	0.0007086966	0.0154145796105289	-0.1376658	-0.0492171	0.02008465
chr1:975017	PLEKHN1	+	0.573941798941799	0.686193151319963	-0.112251352378164	-6.38103555809919	7.82681583788596	0.000234271053614601	0.00920587263559275	-0.152973966761976	-0.0715287379943518	0.0175914005424539
chr1:97768988	DPYD	+	0.6055706	0.6909435	-0.08537293	-7.556378	10.65743	1.343834e-05	0.00284410259755622	-0.1103378	-0.06040804	0.01129813
chr1:97979910	DPYD	+	0.575833	0.659512	-0.08367899	-4.327477	9.111035	0.001858067	0.0251898179061882	-0.1273404	-0.04001753	0.01933667
chr1:97979910	MIR137HG	+	0.575833	0.659512	-0.08367899	-4.327477	9.111035	0.001858067	0.0251898179061882	-0.1273404	-0.04001753	0.01933667
chr1:9800501	CLSTN1	+	0.589321732544239	0.672030209933436	-0.0827084773891968	-4.47193023021826	10.9300194158372	0.000958792946114266	0.0179333227730501	-0.123447582200461	-0.0419693725779327	0.018495028574084
chr1:9800602	CLSTN1	+	0.603183082846159	0.689559932603411	-0.0863768497572521	-5.04376577420038	10.9768903900019	0.00037817674581435	0.0114988903362222	-0.124079434885016	-0.048674264629488	0.0171254680776579
chr1:99182119	AL445433.2	-	0.5434531	0.6561254	-0.1126723	-6.158806	10.63117	8.243357e-05	0.00586721412571601	-0.1531093	-0.07223526	0.0182945
chr1:99229121	AL445433.2	-	0.5687138	0.6988961	-0.1301823	-5.279648	10.96412	0.0002632822	0.00972574260271176	-0.1844745	-0.07589008	0.02465738
chr1:99286778	PLPPR4	+	0.5659097	0.6618041	-0.09589438	-4.939896	9.615268	0.000659699	0.0148705182681127	-0.1393833	-0.0524055	0.01941223
chr1:99473040	LINC01708	-	0.5768131	0.6890513	-0.1122382	-6.272801	8.366712	0.0001986055	0.00853905629981111	-0.1531865	-0.07128993	0.01789284
chr1:99483984	LINC01708	+	0.5957294	0.6829848	-0.08725536	-3.87293	10.28387	0.002937457	0.0321454764999767	-0.1372671	-0.0372436	0.02252955
chr1:99506368	LINC01708	+	0.5956692	0.6946852	-0.09901604	-4.466636	10.98256	0.0009558742	0.0179083021218405	-0.1478168	-0.05021531	0.02216792
chr1:99506832	LINC01708	+	0.5757126	0.6626642	-0.08695164	-8.927271	9.774327	5.212393e-06	0.00197659789868365	-0.1087218	-0.06518145	0.009740002
chr10:100215511	CHUK	+	0.7461012	0.6453909	0.1007103	4.000859	8.431001	0.003545511	0.0356037894827095	0.04317566	0.1582449	0.02517217
chr10:101117407	TLX1NB	-	0.6010314	0.6816874	-0.08065594	-5.76137	8.098938	0.0004045563	0.0118324249668615	-0.1128702	-0.0484417	0.01399944
chr10:104447075	CFAP58	-	0.5278497	0.6432822	-0.1154326	-5.286115	8.894579	0.0005229827	0.0133403787555399	-0.1649206	-0.0659446	0.02183694
chr10:104569711	AL161646.1	-	0.5675219	0.6590883	-0.09156637	-4.740088	8.819344	0.001119616	0.0193941534799686	-0.1354023	-0.04773046	0.01931744
chr10:104817874	SORCS3	-	0.5569213	0.6494243	-0.09250303	-3.834645	10.8952	0.002820067	0.0314366189185624	-0.1456597	-0.03934635	0.02412297
chr10:105894954	AL731574.1	+	0.5823011	0.7241427	-0.1418417	-4.883436	7.818471	0.001302269	0.0209406343136763	-0.2090923	-0.07459105	0.02904547
chr10:106648431	SORCS1	-	0.5820758	0.6670002	-0.08492443	-5.33081	8.613157	0.0005492068	0.013654412667113	-0.1212108	-0.04863806	0.01593087
chr10:107061157	SORCS1	+	0.4788135	0.6216799	-0.1428664	-5.814084	10.95589	0.0001187183	0.00682610038849607	-0.1969766	-0.08875616	0.02457247
chr10:107112343	SORCS1	+	0.5794627	0.6616414	-0.08217873	-5.659232	10.95013	0.0001493192	0.00752391128906027	-0.1141574	-0.05020006	0.01452118
chr10:107737963	LINC01435	+	0.6162079	0.7050094	-0.08880152	-4.355367	10.99963	0.001145183	0.0196037507620191	-0.1336776	-0.04392548	0.02038898
chr10:107763107	LINC01435	-	0.5689907	0.6869833	-0.1179926	-5.096493	7.166792	0.001308018	0.020983874153026	-0.1724805	-0.0635047	0.02315172
chr10:107924838	LINC01435	+	0.6052412	0.6896805	-0.08443927	-3.741791	9.84651	0.003939704	0.0377402454871576	-0.1348271	-0.03405145	0.02256654
chr10:107934857	LINC01435	+	0.6180665	0.7111982	-0.09313172	-4.954192	9.243443	0.000726751	0.0156094879800365	-0.1354869	-0.05077651	0.01879857
chr10:108024077	LINC01435	+	0.4577008	0.5394541	-0.08175325	-4.514795	10.67667	0.0009477655	0.0178366442515669	-0.1217561	-0.04175038	0.01810785
chr10:108055326	LINC01435	+	0.5555684	0.6540367	-0.09846833	-5.160585	10.27108	0.0003900013	0.0116393457745708	-0.1408315	-0.05610517	0.01908085
chr10:108148883	LINC01435	+	0.4539916	0.5595575	-0.1055659	-4.324091	8.880495	0.001982638	0.0260305360324297	-0.1609065	-0.0502254	0.02441344
chr10:10827982	CELF2	+	0.5909625	0.6713853	-0.08042271	-3.905895	10.98858	0.002456332	0.0291760849288011	-0.1257469	-0.0350985	0.02059008
chr10:108723025	LINC02661	+	0.5604485	0.6981863	-0.1377378	-15.48738	10.91566	8.948422e-09	9.86612462182813e-05	-0.1573308	-0.1181448	0.008893547
chr10:108723033	LINC02661	+	0.569109	0.6854943	-0.1163853	-9.707472	10.4262	1.512569e-06	0.00119133135844482	-0.1429518	-0.08981889	0.01198925
chr10:108815428	LINC02661	+	0.6053559	0.7117013	-0.1063454	-3.547552	10.88487	0.004645074	0.0412645632993	-0.1724098	-0.04028094	0.02997711
chr10:109919485	XPNPEP1	+	0.5614892	0.6499106	-0.08842146	-4.266889	8.047023	0.002699218	0.0306967999027382	-0.1361595	-0.04068339	0.0207227
chr10:110251725	MXI1	+	0.5853975	0.6761853	-0.09078783	-4.05991	10.11998	0.002231687	0.027730444041787	-0.1405336	-0.04104208	0.02236203
chr10:110251844	MXI1	+	0.4987596	0.5834967	-0.08473715	-3.609009	10.5685	0.004372309	0.0399049894744228	-0.1366734	-0.03280088	0.02347934
chr10:110754307	RBM20	-	0.6282794	0.7104343	-0.08215489	-8.319518	9.95021	8.612458e-06	0.00242295880778551	-0.1041726	-0.06013718	0.009874958
chr10:111816994	AL136119.1	+	0.6780963	0.5941767	0.08391962	5.295267	8.040599	0.0007205273	0.0155353946077332	0.04740606	0.1204332	0.01584804
chr10:11312368	CELF2	+	0.4973142	0.5814742	-0.08416	-4.215102	9.288514	0.002102707	0.0268535646474591	-0.129114	-0.03920605	0.0199663
chr10:114134156	CCDC186	+	0.5300101	0.6306448	-0.1006347	-5.114463	9.380236	0.000555656	0.0137195255803212	-0.1448725	-0.0563969	0.01967649
chr10:115168752	ATRNL1	-	0.579876	0.6606687	-0.08079275	-3.669896	10.62531	0.003905607	0.0375469633262262	-0.1294567	-0.03212877	0.022015
chr10:115168752	AC016042.1	-	0.579876	0.6606687	-0.08079275	-3.669896	10.62531	0.003905607	0.0375469633262262	-0.1294567	-0.03212877	0.022015
chr10:115172802	ATRNL1	-	0.4937844	0.6304894	-0.136705	-7.919543	10.25587	1.10432e-05	0.00264381566181634	-0.1750368	-0.09837312	0.01726173
chr10:115172802	AC016042.1	-	0.4937844	0.6304894	-0.136705	-7.919543	10.25587	1.10432e-05	0.00264381566181634	-0.1750368	-0.09837312	0.01726173
chr10:115238668	ATRNL1	-	0.537617	0.6566887	-0.1190718	-4.247016	8.031024	0.002785924	0.0312386060978865	-0.1836808	-0.05446277	0.02803657
chr10:115381788	ATRNL1	-	0.4304326	0.5235268	-0.09309423	-3.954781	10.42265	0.002500327	0.0294604379886622	-0.145257	-0.04093146	0.02353967
chr10:115475767	ATRNL1	-	0.6687223	0.4538694	0.2148529	4.365113	10.71243	0.001198851	0.0200356860264516	0.1061635	0.3235423	0.04922046
chr10:115485653	ATRNL1	-	0.5909915	0.6988183	-0.1078268	-9.886318	10.9944	8.320955e-07	0.000946528821764045	-0.1318337	-0.08381986	0.01090666
chr10:115488640	ATRNL1	-	0.5843474	0.6690566	-0.08470924	-4.626472	10.92352	0.0007461328	0.0158162163800354	-0.125043	-0.04437545	0.01830969
chr10:115628515	ATRNL1	-	0.5505054	0.6842191	-0.1337136	-5.581374	8.328085	0.0004520857	0.0124495587308578	-0.1885823	-0.07884497	0.02395712
chr10:115638684	ATRNL1	+	0.535277	0.7011834	-0.1659063	-4.786545	9.544161	0.0008416245	0.016794765534275	-0.2436387	-0.08817394	0.03466098
chr10:115729356	ATRNL1	-	0.5601904	0.6421921	-0.08200164	-6.148887	9.460019	0.0001371406	0.00726350680969001	-0.1119476	-0.05205563	0.01333601
chr10:115755983	ATRNL1	-	0.3336756	0.4658391	-0.1321636	-4.982491	8.924938	0.0007761081	0.0161318669970986	-0.1922457	-0.07208146	0.0265256
chr10:115756358	ATRNL1	-	0.5901659	0.6874287	-0.09726278	-4.563857	9.442555	0.001200704	0.0200529803280318	-0.1451306	-0.04939499	0.02131153
chr10:115811769	ATRNL1	-	0.5364655	0.6452764	-0.1088109	-5.940018	10.1206	0.0001363978	0.00723988728772378	-0.1495608	-0.06806109	0.01831828
chr10:116348321	CCDC172	-	0.3984426	0.4859404	-0.08749773	-3.859812	10.87895	0.002708137	0.030748241831727	-0.1374595	-0.03753599	0.02266891
chr10:116370356	CCDC172	-	0.6168291	0.7027882	-0.08595914	-6.391261	10.17722	7.318441e-05	0.0055764769781935	-0.1158559	-0.05606241	0.01344948
chr10:118984425	AL157388.1	+	0.6143311	0.7268282	-0.1124971	-6.078346	8.871759	0.0001951474	0.00847156165844356	-0.1544572	-0.07053701	0.01850785
chr10:119888913	MCMBP	+	0.4328317	0.3489953	0.08383639	4.611147	9.075585	0.001242648	0.0204204918835585	0.04275971	0.1249131	0.01818124
chr10:120470498	PLPP4	-	0.5984564	0.6785604	-0.080104	-4.780484	10.29471	0.0006870525	0.0151723538063779	-0.1172953	-0.04291265	0.01675646
chr10:120562403	PLPP4	-	0.6080615	0.7102778	-0.1022163	-4.36524	10.97128	0.001133342	0.019506458416752	-0.1537709	-0.05066165	0.02341596
chr10:122027457	TACC2	-	0.6178883	0.7371648	-0.1192765	-7.044452	9.693262	4.133714e-05	0.00443431632470356	-0.1571657	-0.08138722	0.01693197
chr10:122736983	DMBT1P1	-	0.5921919	0.7140067	-0.1218148	-4.672354	10.94041	0.0006898811	0.0152045553924009	-0.1792357	-0.06439387	0.0260714
chr10:123694762	GPR26	+	0.4782297	0.5704252	-0.09219544	-5.015681	10.5939	0.0004404139	0.0123086901427779	-0.1328427	-0.05154814	0.01838144
chr10:123806097	CPXM2	-	0.5373332	0.6264049	-0.08907173	-3.713331	9.527849	0.004366907	0.0398773494098197	-0.1428793	-0.03526414	0.02398701
chr10:125617982	TEX36	-	0.5747141	0.6683062	-0.09359205	-9.008331	7.652897	2.441424e-05	0.00358975194426042	-0.1177408	-0.06944335	0.0103895
chr10:125658590	TEX36	+	0.6323009	0.7156858	-0.08338489	-3.752201	10.87515	0.003260789	0.0340116236885827	-0.1323658	-0.03440395	0.02222293
chr10:125676794	TEX36	-	0.5463893	0.6612597	-0.1148705	-6.290744	10.61373	6.932016e-05	0.00545700530711658	-0.1552402	-0.07450078	0.01826024
chr10:125677934	TEX36	-	0.6015056	0.7082707	-0.106765	-4.376809	10.99147	0.001106977	0.0192801118826201	-0.1604595	-0.05307055	0.02439335
chr10:125697945	AL158835.1	+	0.5658958	0.6666752	-0.1007794	-13.61526	10.93418	3.361495e-08	0.000191289397122984	-0.1170829	-0.08447584	0.007401942
chr10:125893345	DHX32	-	0.6316947	0.5392478	0.09244692	3.590785	9.693576	0.005173284	0.0438376675874243	0.0348354	0.1500584	0.0257456
chr10:125893538	DHX32	+	0.3890651	0.5616559	-0.1725909	-4.094029	7.563589	0.003905983	0.0375493626087164	-0.2707895	-0.07439222	0.04215672
chr10:125896945	FANK1	-	0.4802516	0.6621897	-0.181938	-5.265163	10.36013	0.0003249234	0.0106864420167544	-0.2585703	-0.1053058	0.03455506
chr10:125962689	FANK1	-	0.5791483	0.6654113	-0.08626303	-6.984271	10.85309	2.484553e-05	0.00361035328697488	-0.1134925	-0.05903361	0.01235104
chr10:125962795	FANK1	-	0.5813629	0.672201	-0.0908381	-5.600373	10.86851	0.000167501	0.00791678042880107	-0.1265909	-0.05508533	0.01622001
chr10:126152295	ADAM12	-	0.6157957	0.6987786	-0.08298284	-7.004867	7.123226	0.0001942655	0.00845706311879203	-0.1108973	-0.05506837	0.01184645
chr10:126355102	ADAM12	+	0.5905535	0.7441537	-0.1536003	-6.799342	9.768248	5.322082e-05	0.00489964523485066	-0.2040973	-0.1031032	0.02259046
chr10:126489364	C10orf90	+	0.5242915	0.6203839	-0.09609239	-4.302804	9.124259	0.001920544	0.025603201629291	-0.1465073	-0.04567744	0.02233251
chr10:126772350	C10orf90	-	0.4937753	0.587077	-0.09330172	-6.333548	10.99993	5.571046e-05	0.00498821001032864	-0.1257252	-0.06087821	0.01473135
chr10:126790736	C10orf90	+	0.6221612	0.7034426	-0.0812814	-5.299282	10.97007	0.0002550136	0.00957569825649212	-0.1150518	-0.04751103	0.01533819
chr10:126793958	C10orf90	+	0.5523704	0.6733291	-0.1209586	-4.521455	10.37236	0.001008438	0.0183863662893391	-0.1802774	-0.06163993	0.02675215
chr10:126916607	DOCK1	-	0.5717044	0.6531789	-0.08147456	-5.354437	10.93768	0.0002367926	0.00926060778700881	-0.1149886	-0.04796048	0.01521627
chr10:127005791	AL359094.1	-	0.5889422	0.7129248	-0.1239826	-7.654081	10.84726	1.07731e-05	0.00262514975227822	-0.159696	-0.08826919	0.01619824
chr10:127005791	DOCK1	-	0.5889422	0.7129248	-0.1239826	-7.654081	10.84726	1.07731e-05	0.00262514975227822	-0.159696	-0.08826919	0.01619824
chr10:127550222	NPS	-	0.6102874	0.7038515	-0.09356409	-5.109079	10.64735	0.0003758725	0.0114673100785992	-0.1340349	-0.05309331	0.0183133
chr10:128219209	LINC01163	+	0.5897964	0.6873595	-0.09756315	-5.78001	7.650682	0.0004891802	0.0129238335552436	-0.1367987	-0.05832764	0.01687941
chr10:12914407	AL353586.1	-	0.6225925	0.7308824	-0.1082898	-5.235542	10.99376	0.0002792542	0.0100087127903799	-0.1538173	-0.0627624	0.0206836
chr10:12914407	CCDC3	-	0.6225925	0.7308824	-0.1082898	-5.235542	10.99376	0.0002792542	0.0100087127903799	-0.1538173	-0.0627624	0.0206836
chr10:130319018	LINC02646	-	0.5905414	0.6804075	-0.08986613	-6.489889	6.835937	0.0003726643	0.0114183661889058	-0.1227693	-0.05696297	0.0138471
chr10:130447296	LINC02646	-	0.4655867	0.5547052	-0.08911852	-4.628548	10.99555	0.0007309072	0.0156589571314287	-0.1314986	-0.04673844	0.0192541
chr10:131285143	TCERG1L	+	0.505491	0.6135736	-0.1080826	-8.000752	10.79793	7.328794e-06	0.00228947241044027	-0.1378839	-0.07828134	0.01350905
chr10:132049973	JAKMIP3	-	0.5918051	0.6921773	-0.1003723	-4.554153	9.139206	0.0013245	0.021117869659037	-0.1501141	-0.05063048	0.02203972
chr10:132072077	JAKMIP3	-	0.6489923	0.7302029	-0.08121062	-9.310999	10.99962	1.501944e-06	0.00119133135844482	-0.1004077	-0.06201352	0.008722009
chr10:132273496	STK32C	+	0.6813571	0.7771045	-0.09574742	-5.601976	10.91261	0.0001646226	0.00785294114165991	-0.1334028	-0.058092	0.01709172
chr10:132273702	STK32C	+	0.6305312	0.7185458	-0.08801459	-7.69111	10.40026	1.320222e-05	0.00282655113535736	-0.1133803	-0.06264888	0.01144368
chr10:1371560	ADARB2	+	0.5814916	0.6855077	-0.1040161	-7.004315	7.64642	0.000139261	0.00732300735785081	-0.1385385	-0.06949364	0.01485028
chr10:14158505	FRMD4A	+	0.5481872	0.6622044	-0.1140172	-4.911764	10.55996	0.0005217936	0.0133244970483118	-0.1653699	-0.0626646	0.02321309
chr10:14604985	FAM107B	-	0.305321	0.3963019	-0.09098095	-5.197776	9.929501	0.000411919	0.0119316416237839	-0.1300195	-0.05194244	0.01750382
chr10:1499051	ADARB2	-	0.5912522	0.6840913	-0.09283907	-4.41549	10.95471	0.001046521	0.0187365043471697	-0.1391398	-0.04653831	0.02102577
chr10:15060100	OLAH	-	0.6406931	0.7436741	-0.102981	-5.588586	8.742699	0.0003765613	0.0114765301718352	-0.1448536	-0.06110844	0.01842703
chr10:15061696	OLAH	-	0.623765	0.7039683	-0.08020321	-5.265522	9.586521	0.0004198695	0.0120408012411201	-0.1143412	-0.04606525	0.01523177
chr10:15271173	FAM171A1	+	0.5690158	0.6693254	-0.1003096	-5.534572	10.99394	0.0001771567	0.00810485663323392	-0.1402033	-0.06041585	0.01812418
chr10:15284952	FAM171A1	+	0.549529	0.6587395	-0.1092105	-5.761047	8.629551	0.0003192622	0.0106025311792639	-0.1523758	-0.06604515	0.0189567
chr10:15547138	ITGA8	+	0.6007362	0.6942912	-0.09355499	-6.148282	9.007173	0.0001685109	0.00794001931139824	-0.1279728	-0.05913718	0.01521644
chr10:1568974	ADARB2	+	0.6352163	0.7300591	-0.0948428	-6.346556	6.923217	0.0004043443	0.0118301471983788	-0.1302593	-0.0594263	0.01494398
chr10:15836931	MINDY3	+	0.5950904	0.728448	-0.1333576	-10.36267	10.97901	5.257578e-07	0.000797834634845161	-0.1616888	-0.1050264	0.01286905
chr10:17199496	TRDMT1	+	0.5689259	0.6728684	-0.1039425	-9.943164	10.76944	9.291406e-07	0.000984435626548048	-0.1270111	-0.08087389	0.01045366
chr10:17669729	STAM	-	0.4808979	0.5685885	-0.08769057	-7.323493	9.231088	3.891756e-05	0.0043253413845645	-0.1146743	-0.0607068	0.01197387
chr10:17669759	STAM	-	0.5534585	0.6471929	-0.09373441	-8.839803	8.807857	1.139453e-05	0.0026650245861949	-0.1178016	-0.06966723	0.01060368
chr10:17669784	STAM	-	0.4931649	0.5976392	-0.1044743	-4.154963	10.21487	0.001876894	0.0253096257775952	-0.1603403	-0.04860828	0.02514445
chr10:17669866	STAM	-	0.5834115	0.6689238	-0.08551229	-4.079286	10.56604	0.001978961	0.0260061111672192	-0.1318828	-0.03914175	0.02096256
chr10:17971516	SLC39A12	-	0.559861	0.646142	-0.086281	-3.70011	8.428624	0.005513576	0.0454527337814851	-0.1395813	-0.03298074	0.02331849
chr10:18225467	AL390783.1	-	0.6168196	0.7268464	-0.1100269	-9.159303	8.631238	9.831555e-06	0.00254205654935897	-0.1373792	-0.08267451	0.01201258
chr10:18225467	CACNB2	-	0.6168196	0.7268464	-0.1100269	-9.159303	8.631238	9.831555e-06	0.00254205654935897	-0.1373792	-0.08267451	0.01201258
chr10:18364520	CACNB2	-	0.5639907	0.6543871	-0.09039636	-3.598931	10.99111	0.004183012	0.038986261519132	-0.1456852	-0.03510754	0.02511755
chr10:19430021	MALRD1	-	0.5366275	0.636921	-0.1002935	-4.1904	10.65116	0.00161874	0.0234258953291632	-0.1531833	-0.04740359	0.0239341
chr10:19437451	MALRD1	-	0.5782485	0.6600251	-0.08177658	-5.633935	10.94339	0.0001553735	0.00765630728903631	-0.1137441	-0.0498091	0.014515
chr10:19473948	MALRD1	-	0.5385934	0.6372041	-0.09861069	-4.811454	9.321558	0.0008677374	0.0170749404213352	-0.1447309	-0.05249047	0.02049499
chr10:19666347	MALRD1	-	0.5357371	0.6351124	-0.09937531	-5.974366	8.702002	0.0002389552	0.00929669444572767	-0.1372005	-0.06155011	0.01663362
chr10:19779838	MALRD1	+	0.5739869	0.7242356	-0.1502487	-5.822195	8.947835	0.0002580647	0.00962979823291909	-0.2086783	-0.09181909	0.02580619
chr10:20050826	PLXDC2	+	0.5854225	0.6804099	-0.09498736	-6.860111	7.412105	0.0001848199	0.00826512390750364	-0.1273633	-0.06261143	0.01384633
chr10:20052804	PLXDC2	+	0.6143328	0.7010537	-0.08672091	-3.910978	10.26632	0.002767187	0.0311160263054356	-0.1359539	-0.03748797	0.02217372
chr10:20200551	PLXDC2	+	0.5452135	0.6266106	-0.08139716	-4.948533	10.6964	0.0004745499	0.0127325906269582	-0.1177264	-0.04506795	0.01644874
chr10:20881990	NEBL	+	0.5712596	0.6538963	-0.0826367	-4.020693	10.85279	0.002068252	0.0265958958177379	-0.1279482	-0.0373252	0.02055285
chr10:21547860	MLLT10	-	0.6391738	0.7247188	-0.085545	-4.541073	10.82252	0.0008777867	0.0171777973835071	-0.1270904	-0.0439996	0.01883806
chr10:21674355	MLLT10	-	0.6268992	0.7073335	-0.08043423	-5.299758	10.65846	0.0002807346	0.0100355202370567	-0.1139696	-0.0468989	0.01517696
chr10:23025535	ARMC3	+	0.5526221	0.6340555	-0.08143336	-5.408005	10.52866	0.0002492585	0.00948783696447837	-0.1147576	-0.04810916	0.01505793
chr10:23025535	AL139815.1	+	0.5526221	0.6340555	-0.08143336	-5.408005	10.52866	0.0002492585	0.00948783696447837	-0.1147576	-0.04810916	0.01505793
chr10:23085669	AL139815.1	+	0.5471753	0.6297858	-0.08261047	-3.870179	8.409483	0.004308746	0.0395818674405374	-0.1314189	-0.033802	0.02134539
chr10:2310913	LINC00701	+	0.576653	0.6834937	-0.1068407	-7.936561	10.95382	7.231578e-06	0.00227806006340625	-0.1364852	-0.07719613	0.01346184
chr10:23123326	AL139815.1	-	0.6275102	0.7204365	-0.09292627	-4.649018	10.48224	0.0008024571	0.0164001681925093	-0.1371869	-0.0486656	0.01998836
chr10:23224687	C10orf67	+	0.5707109	0.6658061	-0.0950952	-4.452655	9.425062	0.001422759	0.021893027170661	-0.1430779	-0.0471125	0.02135696
chr10:23259541	C10orf67	+	0.5462597	0.6419553	-0.09569555	-6.315066	9.724466	9.880687e-05	0.00634030661104392	-0.1295898	-0.06180125	0.01515353
chr10:23269834	C10orf67	+	0.537596	0.6247172	-0.08712116	-5.456326	9.837328	0.0002948637	0.0102489174316391	-0.1227778	-0.05146456	0.015967
chr10:23269844	C10orf67	+	0.4920896	0.5732071	-0.08111752	-4.249701	10.9938	0.001368136	0.0214472407162375	-0.1231324	-0.03910262	0.01908782
chr10:23331974	C10orf67	+	0.59905	0.6943711	-0.09532107	-4.578273	9.121315	0.001285696	0.0207977431871533	-0.1423246	-0.04831757	0.02082031
chr10:23504839	AL512603.2	-	0.5517296	0.63391	-0.08218043	-7.383535	10.86297	1.489755e-05	0.00295536482829632	-0.1067157	-0.05764521	0.01113023
chr10:23510573	AL512603.2	-	0.5834425	0.6724353	-0.08899271	-7.890927	7.753704	5.729646e-05	0.00504754870479965	-0.115144	-0.06284143	0.01127785
chr10:23716863	KIAA1217	-	0.4729093	0.5632824	-0.09037305	-3.611316	9.491666	0.005176934	0.0438556256851387	-0.1465396	-0.03420652	0.02502496
chr10:23738376	KIAA1217	-	0.6092072	0.6987549	-0.08954774	-7.199502	10.23614	2.585352e-05	0.00367274637374195	-0.117175	-0.06192046	0.01243805
chr10:23942491	KIAA1217	+	0.6129493	0.6974903	-0.08454095	-4.105867	10.46856	0.001930596	0.0256776925631891	-0.1301421	-0.03893977	0.02059028
chr10:24454088	KIAA1217	+	0.6222456	0.7349282	-0.1126825	-6.721714	10.69898	3.758304e-05	0.00426796559192382	-0.1497068	-0.07565824	0.01676396
chr10:24980175	AL512598.2	-	0.6181517	0.7193411	-0.1011894	-4.81224	9.39315	0.0008481988	0.0168630463988618	-0.1484552	-0.05392366	0.02102751
chr10:25054768	ENKUR	-	0.5304554	0.6315168	-0.1010614	-5.180148	10.05782	0.0004053909	0.0118440712041032	-0.1444971	-0.05762567	0.01950936
chr10:25054768	AL512598.2	-	0.5304554	0.6315168	-0.1010614	-5.180148	10.05782	0.0004053909	0.0118440712041032	-0.1444971	-0.05762567	0.01950936
chr10:25263273	GPR158	-	0.5156327	0.6328551	-0.1172225	-5.75031	9.053063	0.0002701305	0.00985584066730431	-0.1632963	-0.07114861	0.02038541
chr10:25285917	GPR158	-	0.5490505	0.6316744	-0.08262384	-3.838263	10.45231	0.003020811	0.0326225489353545	-0.1303077	-0.03493997	0.02152636
chr10:25317268	GPR158	-	0.5621146	0.6904455	-0.128331	-5.917433	10.97992	0.000101292	0.00640742639664754	-0.1760742	-0.0805877	0.02168693
chr10:2534568	AL713851.1	+	0.5827138	0.7006444	-0.1179306	-3.845703	10.93521	0.002748745	0.0310067107469427	-0.1854738	-0.05038734	0.03066555
chr10:2534618	AL713851.1	+	0.608547	0.7010477	-0.09250066	-11.10034	10.76563	3.139548e-07	0.000662534311670623	-0.1108906	-0.07411071	0.008333137
chr10:25362832	GPR158	-	0.512099	0.5938822	-0.08178318	-7.45838	10.8421	1.372559e-05	0.00286544352603489	-0.1059605	-0.05760582	0.01096527
chr10:2549824	AL713851.1	+	0.6005205	0.6858137	-0.08529319	-4.021294	8.574509	0.00332542	0.034368056125692	-0.1336398	-0.03694656	0.02121038
chr10:25665777	LINC00836	-	0.6078485	0.7371186	-0.1292701	-3.921793	9.719446	0.003018207	0.0326133944297352	-0.2030023	-0.05553783	0.03296198
chr10:25956596	MYO3A	-	0.6083926	0.7026311	-0.0942385	-5.186554	10.17738	0.0003865972	0.0115950763796489	-0.1346278	-0.05384916	0.01816977
chr10:26102043	MYO3A	-	0.5954445	0.6790271	-0.08358251	-5.895998	10.65985	0.0001176637	0.00680386994587396	-0.1149059	-0.05225913	0.01417614
chr10:2613127	AL713851.1	+	0.5651679	0.6691725	-0.1040046	-3.727853	9.774863	0.004081437	0.0384708503312094	-0.1663628	-0.0416464	0.02789933
chr10:26262447	GAD2	-	0.5923763	0.6816791	-0.08930279	-8.093501	10.99976	5.848754e-06	0.00207589748555667	-0.1135883	-0.0650173	0.01103389
chr10:26596298	AL160287.1	-	0.6327414	0.8123844	-0.179643	-6.503789	6.378148	0.0004906738	0.0129413042322757	-0.2462703	-0.1130157	0.02762129
chr10:27528716	RAB18	-	0.5616977	0.6602705	-0.09857275	-5.902063	10.92721	0.0001055965	0.00652539749194748	-0.1353622	-0.0617833	0.01670141
chr10:27704697	MKX	+	0.5975218	0.6952859	-0.09776417	-7.300234	7.892845	8.979423e-05	0.006071478678234	-0.1287191	-0.06680921	0.01339192
chr10:27732232	MKX	-	0.6372719	0.7383128	-0.1010409	-5.692528	9.274511	0.0002656776	0.00977584675788705	-0.1410131	-0.06106861	0.01774973
chr10:27758589	MKX-AS1	-	0.3508728	0.4515617	-0.1006889	-4.183919	10.98856	0.001529842	0.0227397058425842	-0.1536639	-0.04771395	0.02406569
chr10:27808541	ARMC4	+	0.634515	0.7187114	-0.08419634	-9.306096	9.028361	6.347961e-06	0.0021429105688044	-0.1046533	-0.0637394	0.009047439
chr10:27902360	ARMC4	+	0.5553996	0.6558638	-0.1004643	-6.049331	8.791851	0.0002096334	0.00874465974278789	-0.1381691	-0.06275949	0.0166075
chr10:27921973	ARMC4	+	0.6329859	0.7595316	-0.1265457	-5.703919	6.556509	0.0009229928	0.0175983881847068	-0.1797347	-0.07335676	0.02218575
chr10:28137128	MPP7	+	0.5931856	0.6768298	-0.08364422	-3.516795	10.70071	0.005027809	0.0431290785766472	-0.1361721	-0.03111632	0.02378422
chr10:28458918	LINC02652	-	0.6286675	0.7284743	-0.09980675	-6.343419	9.773784	9.322624e-05	0.00616851164022035	-0.1349744	-0.06463913	0.0157339
chr10:28881423	LINC01517	+	0.508039	0.5984581	-0.09041915	-5.477377	8.284756	0.0005222586	0.0133314371828245	-0.1282595	-0.05257877	0.01650775
chr10:29620500	SVIL	+	0.6236201	0.712549	-0.08892889	-7.758802	7.932176	5.697871e-05	0.00503521252734502	-0.115399	-0.06245882	0.01146168
chr10:29720068	SVIL	+	0.563271	0.4404565	0.1228145	3.697767	10.55676	0.003764354	0.0368042919706123	0.04933662	0.1962924	0.03321315
chr10:30016230	JCAD	+	0.5561261	0.4660354	0.09009078	3.798976	8.790356	0.004409722	0.040110524813669	0.03624922	0.1439323	0.02371449
chr10:30083954	JCAD	+	0.5901322	0.6782128	-0.08808052	-4.6803	10.43773	0.000772739	0.0160923056387971	-0.1297756	-0.0463854	0.01881942
chr10:30948620	ZNF438	+	0.5557865	0.6781856	-0.1223991	-5.806113	9.421274	0.000216014	0.00886616094055375	-0.1697648	-0.07503351	0.02108108
chr10:30996050	ZNF438	+	0.4446703	0.3504902	0.09418009	5.141847	8.830082	0.0006476154	0.0147321493570692	0.05262367	0.1357365	0.01831639
chr10:31111029	AL359546.1	-	0.6975322	0.8280146	-0.1304823	-6.001918	10.86806	9.35728e-05	0.00618068358401198	-0.1784029	-0.08256169	0.0217401
chr10:31196692	LINC02664	-	0.6171622	0.7195107	-0.1023485	-6.964247	10.83791	2.56829e-05	0.00366116225080808	-0.1347539	-0.06994311	0.01469628
chr10:31295144	ZEB1-AS1	-	0.6448766	0.7859452	-0.1410686	-7.472311	10.30109	1.803251e-05	0.00318560024684606	-0.1829672	-0.09916996	0.01887884
chr10:31921712	ARHGAP12	+	0.640762	0.7262254	-0.08546343	-4.209612	10.3738	0.001661451	0.0237665632574145	-0.1304791	-0.04044779	0.02030197
chr10:32427544	AL391839.3	-	0.6138998	0.7296647	-0.1157648	-6.574758	9.041029	0.0001000983	0.0063721864195309	-0.1555682	-0.07596151	0.01760747
chr10:32559834	CCDC7	+	0.6308163	0.7510369	-0.1202205	-6.407988	10.64111	5.848117e-05	0.00508770316766737	-0.1616839	-0.07875721	0.01876104
chr10:32669646	CCDC7	-	0.5596327	0.6971252	-0.1374925	-3.526472	10.12972	0.005372186	0.0447889512637499	-0.2242141	-0.05077085	0.03898867
chr10:32717626	CCDC7	+	0.6178417	0.7276061	-0.1097644	-5.084015	10.79627	0.0003739658	0.0114339164297847	-0.1573936	-0.06213529	0.02159011
chr10:32717650	CCDC7	+	0.6019844	0.6996196	-0.09763527	-6.304413	10.31804	7.713809e-05	0.00571397607990237	-0.1319984	-0.06327213	0.01548681
chr10:32739192	CCDC7	-	0.7587429	0.6618079	0.09693506	9.167163	9.636911	4.560475e-06	0.0018647452908454	0.07325348	0.1206166	0.01057416
chr10:32786970	CCDC7	+	0.7470573	0.6345825	0.1124748	10.10825	6.917191	2.159512e-05	0.00342741171866847	0.08609959	0.13885	0.01112703
chr10:32803906	CCDC7	-	0.7612779	0.6580572	0.1032207	6.698242	10.99968	3.384581e-05	0.00410780669751462	0.06930312	0.1371382	0.01541011
chr10:34349620	PARD3	+	0.5277466	0.6653572	-0.1376107	-6.455186	8.431955	0.0001567455	0.00768731657579233	-0.1863348	-0.08888655	0.02131785
chr10:34488123	PARD3	-	0.5447288	0.6635965	-0.1188677	-6.808777	9.800684	5.177115e-05	0.00484117882722635	-0.1578741	-0.07986132	0.01745801
chr10:34704591	PARD3	+	0.5976009	0.6844264	-0.08682555	-4.131675	10.85918	0.001713049	0.024142430068805	-0.1331517	-0.04049942	0.02101461
chr10:37147691	ANKRD30A	+	0.6054167	0.7176283	-0.1122116	-8.224328	9.713467	1.108205e-05	0.00264381566181634	-0.142734	-0.08168916	0.01364386
chr10:37219859	ANKRD30A	+	0.5357143	0.6836761	-0.1479618	-6.666386	10.73026	3.984913e-05	0.00435537414921028	-0.1969634	-0.09896027	0.02219521
chr10:37319409	LINC00993	-	0.5610207	0.4647539	0.09626673	4.717875	9.557629	0.0009268509	0.0176289533822642	0.05051541	0.1420181	0.02040468
chr10:37319409	ANKRD30A	-	0.5610207	0.4647539	0.09626673	4.717875	9.557629	0.0009268509	0.0176289533822642	0.05051541	0.1420181	0.02040468
chr10:37334917	ANKRD30A	-	0.505242	0.5877728	-0.0825308	-5.490397	10.99921	0.0001889995	0.00834892895946538	-0.115616	-0.04944564	0.01503185
chr10:37334917	LINC00993	-	0.505242	0.5877728	-0.0825308	-5.490397	10.99921	0.0001889995	0.00834892895946538	-0.115616	-0.04944564	0.01503185
chr10:38156295	AL117339.5	+	0.3580005	0.4510974	-0.09309696	-5.388967	9.428975	0.0003746735	0.0114471222364262	-0.1319074	-0.05428647	0.01727548
chr10:38181349	AL117339.1	-	0.6355759	0.7318781	-0.09630229	-14.79776	8.7223	1.768222e-07	0.000526463852729958	-0.1110959	-0.08150864	0.006507897
chr10:38181349	AL117339.5	-	0.6355759	0.7318781	-0.09630229	-14.79776	8.7223	1.768222e-07	0.000526463852729958	-0.1110959	-0.08150864	0.006507897
chr10:38349174	AL117339.5	+	0.5243066	0.605857	-0.08155033	-4.243794	7.564826	0.003204988	0.0336906837773176	-0.126311	-0.03678963	0.01921637
chr10:42262732	AL031601.2	-	0.4145508	0.5238853	-0.1093345	-5.402171	9.897232	0.0003114115	0.0104853840565916	-0.1544934	-0.06417568	0.020239
chr10:42671394	LINC01518	+	0.5908463	0.7224361	-0.1315898	-4.519358	7.852883	0.002045432	0.0264531519544738	-0.1989531	-0.06422647	0.02911692
chr10:43480328	ZNF487	-	0.6417195	0.7315702	-0.08985076	-6.410856	10.95623	5.09734e-05	0.00481314266144788	-0.1207135	-0.05898801	0.01401541
chr10:43890374	LINC00840	-	0.5594759	0.6752315	-0.1157556	-6.613504	6.765605	0.000347824	0.0110517285770893	-0.1574359	-0.07407533	0.01750292
chr10:4441590	AC022535.3	-	0.58512	0.4432932	0.1418268	8.626852	7.356954	4.191423e-05	0.00445596131322047	0.1033311	0.1803225	0.01644015
chr10:44940561	TMEM72-AS1	-	0.4509175	0.5443244	-0.09340688	-3.68696	7.980971	0.006182759	0.0483866895570996	-0.1518523	-0.03496143	0.02533439
chr10:44940561	AL353801.1	-	0.4509175	0.5443244	-0.09340688	-3.68696	7.980971	0.006182759	0.0483866895570996	-0.1518523	-0.03496143	0.02533439
chr10:45011962	CEP164P1	-	0.5993122	0.5181427	0.08116947	3.951196	10.96539	0.002281731	0.0280619415019346	0.03593719	0.1264017	0.02054301
chr10:46434487	AC244230.2	+	0.6119611	0.7341175	-0.1221563	-5.400179	6.999167	0.001008686	0.0183896812615941	-0.1756473	-0.06866537	0.02262079
chr10:46434487	LINC00842	+	0.6119611	0.7341175	-0.1221563	-5.400179	6.999167	0.001008686	0.0183896812615941	-0.1756473	-0.06866537	0.02262079
chr10:46496575	AC244230.2	+	0.5545131	0.6526117	-0.09809866	-5.086667	6.95655	0.001447414	0.0220869767287315	-0.1437593	-0.05243801	0.01928545
chr10:46505705	AC244230.2	+	0.5028488	0.5983226	-0.09547378	-7.648621	10.70983	1.168865e-05	0.00268891999991854	-0.1230386	-0.06790893	0.01248248
chr10:46513780	AC244230.2	-	0.6062259	0.6882857	-0.08205983	-3.684465	10.99916	0.003598151	0.0359013769726814	-0.1310803	-0.03303938	0.02227184
chr10:46535118	AC244230.2	+	0.531839	0.6317377	-0.09989869	-6.473455	7.953341	0.0001984377	0.00853548225781774	-0.1355214	-0.06427594	0.01543205
chr10:4665808	MANCR	-	0.565666	0.6641827	-0.09851667	-7.146815	7.386318	0.0001438019	0.00741432816804267	-0.1307699	-0.06626348	0.0137847
chr10:4665808	LINC00705	-	0.565666	0.6641827	-0.09851667	-7.146815	7.386318	0.0001438019	0.00741432816804267	-0.1307699	-0.06626348	0.0137847
chr10:4774105	AC018978.1	+	0.6367919	0.7172365	-0.08044458	-3.982312	8.372898	0.003692998	0.0364131718539789	-0.1266683	-0.03422087	0.02020047
chr10:48474239	ARHGAP22	-	0.5707652	0.6737671	-0.103002	-3.444549	10.9587	0.00550976	0.0454361384816754	-0.168848	-0.03715588	0.02990288
chr10:48514800	ARHGAP22	+	0.6383627	0.7278405	-0.08947782	-17.86014	10.78917	2.340385e-09	4.7184501985e-05	-0.1005309	-0.07842472	0.005009917
chr10:48515888	ARHGAP22	+	0.6032289	0.7332093	-0.1299804	-11.9032	8.128229	1.994927e-06	0.0013574940806027	-0.1550925	-0.1048683	0.01091979
chr10:48746390	WDFY4	-	0.646272	0.7272821	-0.08101005	-7.565881	10.93966	1.141783e-05	0.00266958928828694	-0.1045925	-0.05742761	0.01070729
chr10:48860876	WDFY4	-	0.5455824	0.6491821	-0.1035997	-4.573391	9.877259	0.001053987	0.0187976776632124	-0.1541582	-0.05304116	0.02265271
chr10:48863674	WDFY4	-	0.6323077	0.7533738	-0.1210661	-9.823444	10.90526	9.464715e-07	0.000992367632841753	-0.1482203	-0.09391197	0.01232421
chr10:48972315	WDFY4	-	0.5762497	0.6720328	-0.0957831	-4.046581	10.27694	0.00221016	0.0275863418756854	-0.1483314	-0.04323477	0.02367013
chr10:51050935	PRKG1	-	0.5110686	0.6054503	-0.09438168	-5.500024	10.82552	0.0001972086	0.00850862060779578	-0.1322255	-0.05653786	0.01716023
chr10:51280680	PRKG1	-	0.5624066	0.678869	-0.1164624	-7.124138	5.88823	0.0004185082	0.0120256559721057	-0.1566483	-0.07627655	0.01634758
chr10:51328915	PRKG1	-	0.5909676	0.6805976	-0.08963002	-7.046026	10.6037	2.592136e-05	0.00367806532547758	-0.1177562	-0.06150386	0.01272065
chr10:51430141	PRKG1	+	0.5574111	0.661799	-0.1043879	-6.326448	10.99335	5.64151e-05	0.00501492429938272	-0.1407074	-0.06806844	0.01650024
chr10:51753939	PRKG1	-	0.5735252	0.6763761	-0.1028509	-3.583501	9.430968	0.005470182	0.0452567930070348	-0.1673281	-0.03837366	0.02870123
chr10:52124811	PRKG1	-	0.5103224	0.6020476	-0.09172527	-7.224291	10.99348	1.704472e-05	0.00310781294447457	-0.1196727	-0.06377781	0.01269679
chr10:52135986	PRKG1	+	0.6210684	0.750194	-0.1291257	-9.599378	9.728103	2.839162e-06	0.00152614662560929	-0.1592113	-0.09904001	0.01345146
chr10:52234373	PRKG1-AS1	+	0.576988	0.679202	-0.102214	-3.741303	8.088065	0.00558388	0.04576125296215	-0.1650957	-0.03933217	0.02732041
chr10:52234373	PRKG1	+	0.576988	0.679202	-0.102214	-3.741303	8.088065	0.00558388	0.04576125296215	-0.1650957	-0.03933217	0.02732041
chr10:52477429	LNCAROD	+	0.6158136	0.5354516	0.08036203	4.200513	6.541003	0.004690899	0.0414914388340624	0.03447171	0.1262523	0.01913148
chr10:52610903	LNCAROD	+	0.5946705	0.6750564	-0.08038587	-5.489481	10.20812	0.0002469391	0.00944489521537753	-0.1129239	-0.0478478	0.01464362
chr10:52985060	LINC02672	-	0.5719724	0.7343469	-0.1623745	-9.78426	10.82109	1.047172e-06	0.00103893718924965	-0.1989747	-0.1257743	0.01659548
chr10:52996956	LINC02672	+	0.6052708	0.7038811	-0.09861032	-6.320657	8.508219	0.0001752346	0.00807073082507669	-0.1342163	-0.06300436	0.01560128
chr10:53863479	PCDH15	+	0.5608279	0.6612716	-0.1004437	-4.848133	9.117329	0.0008775204	0.0171749676158433	-0.1472194	-0.05366808	0.02071802
chr10:54187273	PCDH15	-	0.5548557	0.3677489	0.1871067	4.143549	9.821218	0.002079128	0.0266799812013312	0.08624374	0.2879698	0.04515616
chr10:54191880	PCDH15	+	0.6243359	0.4988674	0.1254684	4.494342	10.88554	0.0009335531	0.0177000122180414	0.06394466	0.1869922	0.02791697
chr10:54264616	PCDH15	+	0.6131454	0.6948187	-0.08167328	-7.925112	10.79968	8.001263e-06	0.00235329654559767	-0.1044073	-0.0589393	0.01030563
chr10:54280633	PCDH15	-	0.5960279	0.7149761	-0.1189483	-7.171136	9.966924	3.081357e-05	0.00394469039676161	-0.1559232	-0.08197329	0.01658709
chr10:54462742	PCDH15	-	0.6510871	0.7355996	-0.08451248	-6.791815	7.989144	0.0001398568	0.00733343455122966	-0.1132135	-0.05581143	0.01244328
chr10:54484735	PCDH15	+	0.6098263	0.6988456	-0.08901927	-4.202358	7.288641	0.003676735	0.0363198087960046	-0.1387102	-0.03932836	0.02118317
chr10:54516577	AL353784.1	+	0.5923517	0.6863392	-0.09398748	-5.77891	7.941689	0.0004264895	0.0121211922789972	-0.13154	-0.05643493	0.01626387
chr10:54516577	PCDH15	+	0.5923517	0.6863392	-0.09398748	-5.77891	7.941689	0.0004264895	0.0121211922789972	-0.13154	-0.05643493	0.01626387
chr10:54603553	PCDH15	-	0.5556741	0.6460372	-0.09036308	-3.856306	9.009078	0.003861526	0.0373108745509441	-0.1433631	-0.03736311	0.02343255
chr10:54603553	AL353784.1	-	0.5556741	0.6460372	-0.09036308	-3.856306	9.009078	0.003861526	0.0373108745509441	-0.1433631	-0.03736311	0.02343255
chr10:54783085	PCDH15	+	0.5930161	0.6742166	-0.08120051	-6.798877	10.39326	3.924651e-05	0.00433052557996091	-0.1076758	-0.0547252	0.01194322
chr10:54840626	PCDH15	+	0.6165146	0.6993665	-0.08285195	-5.4684	8.144309	0.0005600572	0.0137703911727412	-0.1176828	-0.04802106	0.01515104
chr10:54924915	PCDH15	-	0.5876753	0.7253559	-0.1376806	-6.613865	8.668691	0.0001160794	0.00675882344776797	-0.1850476	-0.09031354	0.02081696
chr10:54952799	PCDH15	-	0.5889586	0.6737551	-0.08479656	-5.269947	9.458225	0.0004362951	0.0122538247448058	-0.120929	-0.04866416	0.01609059
chr10:55026981	PCDH15	+	0.5549303	0.6839986	-0.1290682	-6.031061	10.93221	8.760268e-05	0.00601857076519074	-0.1762062	-0.08193019	0.02140058
chr10:55122355	PCDH15	+	0.5585093	0.6514253	-0.09291597	-4.187564	10.69527	0.001611874	0.0233698970334073	-0.1419229	-0.043909	0.02218855
chr10:55175590	PCDH15	+	0.6072404	0.7056917	-0.09845127	-7.324606	10.85988	1.60606e-05	0.00303442887128514	-0.1280817	-0.06882082	0.01344117
chr10:55239751	PCDH15	+	0.5516886	0.6488095	-0.09712095	-4.552741	7.330859	0.002335536	0.0284109961038323	-0.1471062	-0.04713567	0.02133241
chr10:55320822	PCDH15	+	0.622744	0.7247619	-0.1020179	-4.970117	8.281317	0.0009864238	0.0181764636838182	-0.1490731	-0.05496268	0.02052625
chr10:55320822	AC016822.1	+	0.622744	0.7247619	-0.1020179	-4.970117	8.281317	0.0009864238	0.0181764636838182	-0.1490731	-0.05496268	0.02052625
chr10:55440226	AC016822.1	+	0.5506608	0.6453821	-0.09472127	-5.535493	9.374617	0.0003140085	0.0105252965579535	-0.1331959	-0.05624661	0.01711162
chr10:55440226	PCDH15	+	0.5506608	0.6453821	-0.09472127	-5.535493	9.374617	0.0003140085	0.0105252965579535	-0.1331959	-0.05624661	0.01711162
chr10:56171	TUBB8	-	0.407884	0.496209	-0.08832502	-4.339006	10.68322	0.00125918	0.020567934764936	-0.133291	-0.04335904	0.02035605
chr10:5657531	ASB13	+	0.5972854	0.5052815	0.09200389	3.850958	10.9976	0.002696105	0.0306785562682608	0.03941838	0.1445894	0.02389117
chr10:58242454	IPMK	+	0.6353843	0.718231	-0.08284671	-10.5318	10.88295	4.820304e-07	0.000772258624579365	-0.1001832	-0.06551026	0.007866342
chr10:59208797	PHYHIPL	+	0.583434	0.6654202	-0.08198618	-3.515323	10.72527	0.005023432	0.0431088260464324	-0.1334796	-0.03049279	0.02332252
chr10:59660249	SLC16A9	+	0.6071323	0.7265143	-0.1193819	-6.38306	10.85626	5.522105e-05	0.00497049347995791	-0.1606134	-0.07815048	0.01870293
chr10:59662590	SLC16A9	+	0.6046252	0.699888	-0.09526279	-4.179798	7.390743	0.003669862	0.0362816665098212	-0.1485833	-0.04194232	0.02279124
chr10:59735737	SLC16A9	+	0.6088955	0.7188091	-0.1099135	-5.164825	10.75771	0.0003340554	0.0108397490195438	-0.1568821	-0.06294495	0.02128117
chr10:61430604	TMEM26	+	0.5736562	0.6710165	-0.09736035	-6.86407	10.87317	2.877697e-05	0.00383326690740846	-0.1286237	-0.06609697	0.01418406
chr10:61959	TUBB8	-	0.4119713	0.5589767	-0.1470054	-8.023265	10.96664	6.476843e-06	0.00217115777211639	-0.1873477	-0.1066631	0.01832239
chr10:63358442	JMJD1C	+	0.6351645	0.4258942	0.2092702	3.535537	10.6522	0.004900803	0.0425229380887416	0.07847195	0.3400685	0.05919051
chr10:63796736	AC013287.1	+	0.6186064	0.7127646	-0.0941582	-5.781368	10.93775	0.0001253312	0.00697948350291959	-0.1300294	-0.05828697	0.01628649
chr10:63805761	AC013287.1	-	0.5977041	0.6809168	-0.08321267	-3.495224	9.227336	0.006520076	0.0498687791656008	-0.1368675	-0.02955787	0.02380754
chr10:64251514	AC013287.1	-	0.5355316	0.6485723	-0.1130407	-4.769692	9.757101	0.000811108	0.0164832011513982	-0.1660259	-0.06005555	0.02369979
chr10:64283075	AC013287.1	+	0.6069548	0.7134948	-0.10654	-7.06068	9.815375	3.803057e-05	0.00428376873273743	-0.1402468	-0.07283328	0.0150892
chr10:64345010	AC013287.1	+	0.4931891	0.592725	-0.09953584	-4.719073	10.18869	0.0007768839	0.0161414375034302	-0.1464146	-0.0526571	0.02109224
chr10:64426833	AC013287.1	+	0.5772531	0.6771156	-0.09986253	-5.96205	9.76183	0.0001531967	0.00760653378824233	-0.137307	-0.06241809	0.0167497
chr10:64460651	AC013287.1	-	0.6010101	0.6975605	-0.0965504	-5.785036	9.586977	0.0002076503	0.00870619842189542	-0.1339556	-0.05914517	0.01668968
chr10:64469511	AC013287.1	+	0.5098666	0.6078871	-0.09802046	-5.792891	8.996649	0.000262169	0.00970188915014684	-0.1363002	-0.05974074	0.01692082
chr10:64693351	AC013287.1	-	0.49763	0.6148382	-0.1172082	-5.106841	10.94062	0.0003462406	0.0110338145417193	-0.167757	-0.06665944	0.02295121
chr10:64919165	LINC02671	+	0.5493295	0.6308217	-0.08149215	-5.32626	8.817495	0.0005108461	0.0131953615847976	-0.1162128	-0.04677148	0.01530007
chr10:64919506	LINC02671	+	0.5975512	0.6819514	-0.08440022	-5.881305	10.24429	0.0001407635	0.00734998167252479	-0.1162723	-0.05252815	0.0143506
chr10:64952833	LINC02671	-	0.3761459	0.4564759	-0.08032998	-4.808466	10.66721	0.0005953111	0.0141634022741326	-0.11724	-0.04342	0.01670595
chr10:65633678	LINC01515	+	0.571075	0.6606815	-0.08960654	-6.757308	10.91826	3.244629e-05	0.004030851733125	-0.1188198	-0.06039328	0.01326069
chr10:65647474	LINC01515	+	0.5106193	0.6074481	-0.09682878	-4.942982	10.5941	0.0004925159	0.0129613689345516	-0.1401466	-0.05351096	0.01958914
chr10:65656189	LINC01515	+	0.5732375	0.6785736	-0.1053362	-5.470194	10.097	0.0002638374	0.00973860457964116	-0.1481863	-0.06248608	0.01925639
chr10:65677269	LINC01515	-	0.5728957	0.6589452	-0.08604949	-7.392008	8.47021	5.705808e-05	0.00503844053069703	-0.1126362	-0.05946276	0.01164088
chr10:65731773	LINC01515	-	0.5434675	0.6374147	-0.09394721	-5.649507	8.864269	0.0003317799	0.010801854329104	-0.1316532	-0.05624118	0.01662928
chr10:65757469	LINC01515	-	0.505363	0.5908667	-0.08550367	-8.374373	7.928662	3.308591e-05	0.0040645153382399	-0.1090853	-0.06192208	0.01021016
chr10:66061783	CTNNA3	-	0.5683608	0.6532612	-0.08490042	-4.026058	10.10031	0.002366702	0.028613514362546	-0.1318236	-0.03797721	0.02108773
chr10:66201579	CTNNA3	-	0.4655042	0.5503557	-0.08485146	-4.419179	6.161092	0.004199015	0.0390578022918589	-0.1315378	-0.03816514	0.01920073
chr10:66227900	CTNNA3	-	0.5385743	0.6425171	-0.1039428	-7.112714	10.76594	2.199059e-05	0.0034478429781493	-0.1361927	-0.07169279	0.01461366
chr10:66229370	CTNNA3	-	0.5627558	0.6499238	-0.08716797	-4.238798	9.296561	0.002024939	0.0263078537118423	-0.1334624	-0.04087349	0.02056431
chr10:66229396	CTNNA3	-	0.590878	0.6730691	-0.08219111	-7.930086	9.021534	2.34128e-05	0.00353236928116314	-0.1056286	-0.05875359	0.01036447
chr10:66334877	CTNNA3	-	0.6209638	0.7024579	-0.08149413	-3.584841	9.778836	0.005151315	0.0437397497115061	-0.1323021	-0.03068617	0.02273298
chr10:66425883	CTNNA3	-	0.6135287	0.7256394	-0.1121107	-4.380204	8.475565	0.00204446	0.0264438187535515	-0.1705611	-0.05366038	0.02559486
chr10:66699510	CTNNA3	-	0.5613397	0.6417667	-0.08042702	-6.376377	10.91108	5.446816e-05	0.00494034382298843	-0.1082163	-0.05263775	0.01261328
chr10:67164532	CTNNA3	+	0.5628309	0.6433078	-0.08047697	-5.117361	10.73385	0.0003617885	0.0112651411260039	-0.1151953	-0.04575869	0.01572627
chr10:67192615	CTNNA3	+	0.5900597	0.7265095	-0.1364498	-12.64976	10.57502	1.012948e-07	0.000397095312211111	-0.1603082	-0.1125914	0.01078675
chr10:67199219	CTNNA3	+	0.6035563	0.5141724	0.08938385	9.28879	10.66811	1.93383e-06	0.0013404500314833	0.06812362	0.1106441	0.009622766
chr10:67305925	CTNNA3	+	0.6370853	0.7193888	-0.08230357	-5.151947	9.21085	0.0005589368	0.0137581668422925	-0.1183163	-0.04629078	0.01597524
chr10:67344593	CTNNA3	-	0.5075517	0.6137623	-0.1062105	-4.83542	10.44752	0.0006055727	0.0142803673085316	-0.1548691	-0.05755189	0.02196511
chr10:67345798	CTNNA3	-	0.5748173	0.6679337	-0.0931164	-5.182307	7.41797	0.001066109	0.0188935335212346	-0.1351238	-0.05110904	0.01796814
chr10:67406765	CTNNA3	+	0.4078457	0.5361826	-0.1283369	-6.794023	10.97377	3.013157e-05	0.00390269647521109	-0.1699249	-0.08674885	0.01888967
chr10:67483664	CTNNA3	+	0.5721547	0.6556259	-0.0834712	-4.679685	9.219021	0.001080416	0.0190185936277004	-0.1236755	-0.04326693	0.01783693
chr10:6772881	AL158210.1	-	0.5010788	0.610453	-0.1093741	-6.214883	7.902242	0.0002685155	0.00982720417561191	-0.1500445	-0.0687038	0.01759874
chr10:6772881	AL392086.2	-	0.5010788	0.610453	-0.1093741	-6.214883	7.902242	0.0002685155	0.00982720417561191	-0.1500445	-0.0687038	0.01759874
chr10:68143448	MYPN	+	0.5156408	0.6022367	-0.08659599	-4.423614	8.122066	0.002135401	0.027092296193948	-0.1316202	-0.04157183	0.01957585
chr10:6890350	AL392086.3	-	0.6293528	0.7313132	-0.1019604	-6.670327	7.677721	0.0001895036	0.00835700098656334	-0.1374684	-0.06645234	0.01528566
chr10:6925914	AL392086.3	+	0.3721684	0.5373196	-0.1651512	-4.604775	10.35635	0.000887994	0.0172740805813392	-0.2446927	-0.08560968	0.0358652
chr10:69306332	HK1	+	0.657888	0.7478484	-0.08996049	-25.27766	10.93631	4.735244e-11	4.9626402305e-06	-0.09779913	-0.08212185	0.003558893
chr10:6970044	AL392086.3	+	0.5162367	0.5976369	-0.08140018	-4.078961	10.95716	0.001838	0.0250416498687056	-0.1253442	-0.03745613	0.0199561
chr10:71403578	CDH23	-	0.6589296	0.7640428	-0.1051133	-19.59663	9.387507	6.219501e-09	7.71039317785088e-05	-0.1171712	-0.09305534	0.005363845
chr10:71416508	CDH23	-	0.5983844	0.7047424	-0.106358	-5.842486	9.065009	0.000239303	0.00930207527158045	-0.1474938	-0.06522212	0.01820423
chr10:71425537	CDH23	+	0.5496291	0.655703	-0.1060739	-4.522849	10.59076	0.0009547582	0.0178991854021785	-0.1579378	-0.05421003	0.0234529
chr10:71500993	CDH23	-	0.5421809	0.623268	-0.08108708	-3.569408	10.79244	0.0045303	0.0406937501973115	-0.131205	-0.03096921	0.02271724
chr10:7207785	SFMBT2	+	0.7622529	0.6575314	0.1047215	6.857576	10.27032	3.867203e-05	0.00431368306324692	0.07081677	0.1386262	0.01527092
chr10:72137567	ASCC1	+	0.6324503	0.7142816	-0.08183132	-6.933128	9.228133	6.019741e-05	0.005152467177453	-0.1084312	-0.05523148	0.01180294
chr10:72396660	MICU1	+	0.6239046	0.7122485	-0.08834395	-11.59119	8.778479	1.281891e-06	0.0011255518938495	-0.1056519	-0.07103604	0.007621647
chr10:73175546	FAM149B1	+	0.6470893	0.7304023	-0.08331305	-6.292889	10.24205	8.0924e-05	0.00582265797287652	-0.1127177	-0.05390841	0.01323924
chr10:73295926	CFAP70	-	0.6160516	0.7080447	-0.09199314	-3.65351	10.88699	0.003861267	0.0373098950297146	-0.1474829	-0.03650341	0.02517939
chr10:74305951	ADK	-	0.6065845	0.6963094	-0.0897249	-4.084423	8.369759	0.003192467	0.0336203043389595	-0.1399953	-0.03945447	0.02196759
chr10:75943937	LRMDA	-	0.6756236	0.76383	-0.08820637	-6.391992	9.977919	7.992281e-05	0.00579523991050929	-0.1189628	-0.05744991	0.01379951
chr10:76152131	LRMDA	-	0.6651496	0.7454106	-0.08026102	-7.45627	6.991874	0.0001432863	0.00740272023094663	-0.1057204	-0.05480166	0.01076423
chr10:76220469	LRMDA	+	0.6080752	0.6962139	-0.0881387	-6.820634	10.99614	2.878981e-05	0.0038336803389434	-0.1165818	-0.05969556	0.01292236
chr10:76239454	LRMDA	-	0.5683131	0.6760588	-0.1077457	-7.223751	10.94873	1.744066e-05	0.00313467654587366	-0.1405932	-0.07489817	0.01491548
chr10:76884930	KCNMA1	+	0.6372318	0.7452706	-0.1080388	-8.982994	10.76994	2.487065e-06	0.00147009182815745	-0.1345792	-0.08149829	0.01202703
chr10:76940960	KCNMA1	+	0.5790464	0.7245742	-0.1455278	-8.23211	10.38672	7.196815e-06	0.00227625484201031	-0.1847191	-0.1063365	0.01767807
chr10:76940960	KCNMA1-AS1	+	0.5790464	0.7245742	-0.1455278	-8.23211	10.38672	7.196815e-06	0.00227625484201031	-0.1847191	-0.1063365	0.01767807
chr10:77134237	KCNMA1	+	0.5609642	0.6747754	-0.1138112	-7.852621	8.00891	4.960361e-05	0.00476233281921092	-0.1472266	-0.08039585	0.01449341
chr10:78345499	AC012560.2	-	0.5770121	0.6709145	-0.09390245	-4.894443	8.527709	0.0009990801	0.0182968531184631	-0.1376723	-0.0501326	0.01918552
chr10:78345499	LINC00595	-	0.5770121	0.6709145	-0.09390245	-4.894443	8.527709	0.0009990801	0.0182968531184631	-0.1376723	-0.0501326	0.01918552
chr10:78483283	AC012560.2	-	0.6356613	0.7988327	-0.1631715	-9.707321	7.859801	1.196691e-05	0.00271965269195106	-0.202054	-0.1242889	0.01680912
chr10:78483283	LINC00595	-	0.6356613	0.7988327	-0.1631715	-9.707321	7.859801	1.196691e-05	0.00271965269195106	-0.202054	-0.1242889	0.01680912
chr10:78494717	AC012560.2	+	0.6307258	0.8103448	-0.179619	-7.355009	6.095447	0.0003005681	0.0103299143267189	-0.2391497	-0.1200883	0.02442131
chr10:78494717	LINC00595	+	0.6307258	0.8103448	-0.179619	-7.355009	6.095447	0.0003005681	0.0103299143267189	-0.2391497	-0.1200883	0.02442131
chr10:79428804	ZCCHC24	+	0.6001086	0.6811458	-0.08103723	-5.081852	10.78819	0.0003760938	0.0114696580760221	-0.1162193	-0.04585519	0.0159464
chr10:79823700	NUTM2B-AS1	-	0.4782957	0.5612151	-0.08291936	-3.61938	10.09561	0.004622877	0.0411429989139949	-0.1339002	-0.03193855	0.02290982
chr10:80545229	SH2D4B	-	0.6683944	0.7586428	-0.09024839	-16.48402	10.94074	4.511805e-09	7.07486115816667e-05	-0.1023065	-0.07819024	0.005474902
chr10:80625175	SH2D4B	-	0.6025278	0.6923677	-0.08983991	-6.49287	8.905875	0.0001178155	0.0068070695441333	-0.1211912	-0.05848861	0.0138367
chr10:80626266	SH2D4B	-	0.6317652	0.7284659	-0.09670069	-5.590901	7.958664	0.0005252583	0.0133649375752894	-0.1366216	-0.05677976	0.01729608
chr10:80643276	SH2D4B	-	0.6121704	0.6994349	-0.08726456	-6.768541	7.300376	0.0002159704	0.00886540274601512	-0.1174984	-0.05703069	0.01289267
chr10:81939544	NRG3	-	0.5190427	0.6492952	-0.1302525	-4.638856	7.160754	0.002235431	0.0277561064772587	-0.1963469	-0.06415819	0.02807859
chr10:82056795	NRG3	-	0.5507178	0.6434948	-0.092777	-4.969527	10.87219	0.0004374301	0.0122671484227605	-0.1339266	-0.0516274	0.01866918
chr10:82154033	NRG3	-	0.5757559	0.6816586	-0.1059027	-9.349961	8.702515	7.890936e-06	0.00233807539839765	-0.1316593	-0.08014616	0.01132654
chr10:82180315	NRG3	-	0.5591038	0.6559588	-0.09685499	-7.061759	10.27976	2.989042e-05	0.00388996775048857	-0.1273025	-0.06640749	0.01371542
chr10:82424720	NRG3	-	0.561553	0.676918	-0.115365	-4.497209	10.32473	0.00105998	0.0188478728782381	-0.1722798	-0.05845024	0.02565258
chr10:82435547	NRG3	-	0.5667727	0.71183	-0.1450573	-4.884494	10.51102	0.0005516711	0.0136803107353468	-0.210794	-0.07932064	0.02969751
chr10:82560813	NRG3	-	0.4675785	0.5752213	-0.1076428	-4.114653	10.71971	0.00181092	0.0248376717112424	-0.1654066	-0.04987895	0.02616084
chr10:82753152	NRG3	-	0.5729433	0.6535696	-0.08062636	-4.20292	8.242063	0.002792737	0.0312772943339523	-0.1246383	-0.03661445	0.01918341
chr10:82775165	NRG3	-	0.5961328	0.7027933	-0.1066604	-6.276961	10.42728	7.637633e-05	0.00568452515279506	-0.1443125	-0.06900832	0.01699237
chr10:82792838	NRG3	-	0.4614836	0.5482276	-0.08674401	-5.510412	10.37116	0.0002264691	0.00905983180369594	-0.1216496	-0.05183842	0.01574184
chr10:82893642	NRG3	+	0.637489	0.718465	-0.08097596	-4.575444	8.93979	0.001359903	0.0213891677296942	-0.1210526	-0.04089928	0.01769795
chr10:85443672	AC025428.1	+	0.5855623	0.6780069	-0.09244453	-5.046057	10.86114	0.0003893324	0.0116315918571489	-0.1328299	-0.05205916	0.01832015
chr10:85813932	GRID1	+	0.645197	0.7258272	-0.08063011	-4.050713	10.4175	0.002135538	0.0270931869482201	-0.1247418	-0.03651839	0.01990516
chr10:85834106	GRID1	+	0.5469986	0.6603915	-0.1133929	-4.871754	9.220477	0.0008218561	0.0165928583310635	-0.1658546	-0.06093116	0.02327558
chr10:85888648	GRID1	-	0.5195761	0.6210972	-0.1015211	-5.317713	10.67424	0.0002719209	0.00988141544582625	-0.1436973	-0.05934483	0.01909112
chr10:85908896	GRID1	+	0.5993043	0.7049824	-0.1056781	-7.993285	9.704947	1.422144e-05	0.00290258406740891	-0.1352578	-0.07609833	0.01322086
chr10:86297465	GRID1	+	0.5296226	0.6122192	-0.08259658	-4.395901	10.4882	0.001198963	0.0200356860264516	-0.1241994	-0.04099372	0.01878946
chr10:86731793	LDB3	-	0.6039112	0.7277237	-0.1238124	-6.067443	10.99996	8.104774e-05	0.0058256210670164	-0.1687258	-0.07889904	0.02040603
chr10:86758471	BMPR1A	-	0.4460759	0.3573441	0.08873179	4.522989	10.95481	0.0008767825	0.0171686208066239	0.04553123	0.1319323	0.01961795
chr10:86977568	AGAP11	-	0.612203	0.7005772	-0.08837425	-4.987879	9.52329	0.0006338087	0.014584857602299	-0.1281215	-0.04862702	0.0177178
chr10:86977568	ADIRF	-	0.612203	0.7005772	-0.08837425	-4.987879	9.52329	0.0006338087	0.014584857602299	-0.1281215	-0.04862702	0.0177178
chr10:87213151	NUTM2A-AS1	+	0.478389	0.5645438	-0.08615482	-4.18543	9.020024	0.002345538	0.0284766901228472	-0.1327044	-0.03960529	0.02058446
chr10:87422274	FAM245A	-	0.3020243	0.4712158	-0.1691915	-5.65949	9.957773	0.0002130218	0.00881106074416764	-0.2358404	-0.1025426	0.02989518
chr10:87682941	PAPSS2	-	0.7905855	0.6605617	0.1300238	13.76171	8.572133	3.859702e-07	0.000715538522402887	0.1084867	0.1515609	0.009448229
chr10:89482086	SLC16A12	+	0.6323302	0.7236005	-0.09127031	-5.370677	7.495585	0.0008309282	0.016680854065633	-0.1309228	-0.05161781	0.01699419
chr10:89506841	SLC16A12	+	0.5897408	0.7007028	-0.110962	-5.813903	7.541481	0.0004971666	0.0130179681732468	-0.1554437	-0.0664803	0.01908563
chr10:8971108	AC044784.1	+	0.542519	0.6301159	-0.08759695	-5.001813	10.99979	0.000401404	0.0117910545141953	-0.126143	-0.04905092	0.01751304
chr10:89967655	LINC01374	-	0.4811281	0.6092841	-0.128156	-7.178499	10.34517	2.506095e-05	0.00362574878437884	-0.1677552	-0.08855673	0.01785275
chr10:90034785	LINC01374	+	0.631659	0.8235437	-0.1918847	-7.037352	6.687008	0.0002527643	0.00953741562223351	-0.2569768	-0.1267926	0.02726661
chr10:90074669	LINC01374	-	0.5745251	0.6809664	-0.1064413	-6.373783	8.443792	0.000170556	0.00797814272853828	-0.1446018	-0.06828083	0.01669986
chr10:90074669	AL139340.1	-	0.5745251	0.6809664	-0.1064413	-6.373783	8.443792	0.000170556	0.00797814272853828	-0.1446018	-0.06828083	0.01669986
chr10:90117881	LINC01374	-	0.5442798	0.6334913	-0.08921146	-7.379753	10.98706	1.404229e-05	0.0028860697533343	-0.1158223	-0.06260063	0.01208868
chr10:90494462	AL391704.1	-	0.5895203	0.6848255	-0.09530517	-4.048333	9.569574	0.002549107	0.0297578381136164	-0.1480812	-0.04252914	0.02354183
chr10:90494462	LINC02653	-	0.5895203	0.6848255	-0.09530517	-4.048333	9.569574	0.002549107	0.0297578381136164	-0.1480812	-0.04252914	0.02354183
chr10:90518227	LINC02653	-	0.5072479	0.6318245	-0.1245766	-5.650008	8.728441	0.0003508459	0.0110942929261259	-0.1746922	-0.07446089	0.02204892
chr10:90557898	LINC02653	+	0.6091226	0.6941593	-0.08503675	-5.198186	10.9618	0.000298665	0.0103066846696254	-0.1210578	-0.04901567	0.01635893
chr10:91458797	HECTD2	+	0.589287	0.6764426	-0.08715563	-5.233241	8.075991	0.0007661132	0.0160205910826048	-0.1254976	-0.04881371	0.01665424
chr10:93793806	LGI1	-	0.5033879	0.5978364	-0.09444852	-4.578949	8.306807	0.001636901	0.0235629260941452	-0.1417097	-0.04718738	0.02062668
chr10:94481991	TBC1D12	-	0.5994269	0.6981998	-0.09877288	-5.391507	9.646863	0.0003452313	0.0110209594813382	-0.139796	-0.05774972	0.01832009
chr10:94482128	TBC1D12	-	0.6271969	0.7137869	-0.08658998	-6.450071	9.591922	8.875865e-05	0.00605533744418987	-0.1166754	-0.05650459	0.01342466
chr10:94785312	AL583836.1	-	0.5530002	0.6338909	-0.08089076	-4.446664	10.15984	0.001194329	0.0200000081616356	-0.1213373	-0.0404442	0.01819134
chr10:94785312	CYP2C19	-	0.5530002	0.6338909	-0.08089076	-4.446664	10.15984	0.001194329	0.0200000081616356	-0.1213373	-0.0404442	0.01819134
chr10:94807458	CYP2C19	-	0.5686664	0.6991758	-0.1305094	-4.985194	10.4424	0.000482009	0.0128328712916918	-0.1885075	-0.0725113	0.0261794
chr10:94807458	AL583836.1	-	0.5686664	0.6991758	-0.1305094	-4.985194	10.4424	0.000482009	0.0128328712916918	-0.1885075	-0.0725113	0.0261794
chr10:94812520	CYP2C19	-	0.5243203	0.6400072	-0.1156869	-4.752652	5.895801	0.003301005	0.0342240646974082	-0.1755046	-0.05586918	0.02434154
chr10:94812520	AL583836.1	-	0.5243203	0.6400072	-0.1156869	-4.752652	5.895801	0.003301005	0.0342240646974082	-0.1755046	-0.05586918	0.02434154
chr10:94976537	CYP2C9	-	0.4743836	0.5832815	-0.1088979	-5.630424	8.463269	0.0004020745	0.0118014562765577	-0.1530769	-0.06471895	0.01934098
chr10:95165625	AL157834.4	+	0.5925767	0.6816304	-0.08905375	-3.670678	9.797813	0.004461899	0.0403655444411467	-0.1432619	-0.03484564	0.02426084
chr10:95376644	SORBS1	+	0.5496277	0.6346626	-0.08503495	-6.20573	10.05633	9.829196e-05	0.00632715263588761	-0.1155432	-0.05452671	0.01370265
chr10:96217795	BLNK	-	0.5809163	0.7016795	-0.1207632	-7.748253	9.337171	2.315305e-05	0.00352103500792026	-0.1558277	-0.08569863	0.01558586
chr10:96499933	TLL2	+	0.4984493	0.5866416	-0.08819227	-5.944225	7.758344	0.0003875196	0.0116064258466044	-0.122592	-0.05379255	0.01483663
chr10:9775398	LINC02663	+	0.5831009	0.6725546	-0.08945374	-6.149169	10.98065	7.270734e-05	0.00556572400313517	-0.121479	-0.05742849	0.01454729
chr10:98022457	CRTAC1	+	0.5658584	0.652521	-0.08666261	-4.571915	6.708435	0.002863769	0.0316967956990934	-0.131883	-0.04144219	0.01895543
chr10:9840626	LINC02663	+	0.4894814	0.652579	-0.1630975	-5.672214	10.44146	0.0001752225	0.00807073082507669	-0.2267996	-0.09939541	0.02875377
chr10:98432616	HPS1	-	0.6166515	0.7894048	-0.1727532	-8.517551	6.191078	0.0001210988	0.00687960323146285	-0.2220126	-0.1234938	0.02028203
chr10:98504099	HPSE2	-	0.5801468	0.6880545	-0.1079078	-5.240203	9.42496	0.0004598342	0.0125488303251344	-0.1541726	-0.06164299	0.02059229
chr10:98505511	HPSE2	-	0.6905976	0.5953881	0.09520951	4.942595	8.438859	0.0009668343	0.0180017974901182	0.05118772	0.1392313	0.01926306
chr10:98630419	HPSE2	-	0.641646	0.7367693	-0.09512323	-7.081765	10.49012	2.622671e-05	0.003693909084002	-0.1248634	-0.06538303	0.01343214
chr10:98732167	HPSE2	+	0.4712947	0.597619	-0.1263243	-12.40239	9.846822	2.486642e-07	0.000596823682880952	-0.1490669	-0.1035817	0.01018548
chr10:98761273	HPSE2	-	0.4074005	0.4875585	-0.08015799	-4.667613	8.559758	0.001341281	0.0212430106205813	-0.1193132	-0.04100273	0.01717323
chr10:98765713	HPSE2	+	0.5117283	0.6680672	-0.1563389	-7.646882	9.293998	2.646722e-05	0.00370485950896647	-0.2023662	-0.1103117	0.0204448
chr10:9876681	LINC02663	+	0.5567209	0.6781492	-0.1214283	-4.963372	10.95385	0.0004319007	0.0121967042985514	-0.1753028	-0.06755376	0.02446487
chr10:98797491	HPSE2	+	0.6214439	0.7165716	-0.09512774	-5.921235	10.96369	0.0001013423	0.00640891502603513	-0.130502	-0.05975347	0.01606552
chr10:99024063	HPSE2	+	0.624171	0.712482	-0.08831092	-4.072234	10.85133	0.001896212	0.0254291982709339	-0.1361216	-0.0405002	0.02168611
chr10:99036450	HPSE2	+	0.5354962	0.6176248	-0.08212852	-4.797922	9.879794	0.0007510386	0.0158661022062152	-0.1203317	-0.04392531	0.01711752
chr10:99045408	HPSE2	+	0.6015109	0.6825832	-0.08107237	-5.630351	10.99998	0.0001532261	0.00760723978565398	-0.1127647	-0.04938001	0.01439917
chr10:99055210	HPSE2	+	0.6127223	0.7053723	-0.09264994	-4.873996	8.956313	0.0008910888	0.017301354773669	-0.1356834	-0.04961653	0.01900903
chr10:99074745	HPSE2	-	0.5652098	0.7172366	-0.1520269	-4.686529	9.539544	0.0009755191	0.0180801464094395	-0.2247814	-0.0792723	0.03243912
chr10:99077459	HPSE2	-	0.5731916	0.7032432	-0.1300516	-5.646837	8.959569	0.0003201083	0.0106139645667324	-0.1821869	-0.0779163	0.02303088
chr10:99122372	HPSE2	+	0.5786874	0.6712869	-0.09259954	-4.862149	10.56739	0.0005623194	0.0137901422160828	-0.1347276	-0.0504715	0.01904498
chr10:99127371	HPSE2	+	0.5398823	0.6248052	-0.08492297	-4.186696	8.533769	0.002645328	0.0303663649128058	-0.1311936	-0.03865236	0.02028401
chr10:99340475	CNNM1	-	0.5922855	0.6948606	-0.1025751	-5.148616	9.944061	0.0004401113	0.012305284084139	-0.1469998	-0.05815033	0.01992284
chr11:100026857	CNTN5	-	0.5566308	0.6445232	-0.08789237	-6.302375	10.42438	7.391239e-05	0.0056076375699871	-0.1187952	-0.05698956	0.01394591
chr11:100048837	CNTN5	+	0.5231466	0.670903	-0.1477565	-6.274955	8.755472	0.0001634017	0.0078266330830505	-0.2012512	-0.09426178	0.02354701
chr11:100057084	CNTN5	+	0.6013103	0.6815887	-0.08027835	-4.779336	10.32167	0.0006832533	0.0151349504143045	-0.1175468	-0.04300987	0.01679697
chr11:100178218	CNTN5	-	0.5746389	0.6941919	-0.119553	-4.11155	10.28864	0.001983273	0.0260336863485936	-0.1840958	-0.05501013	0.02907735
chr11:100178352	CNTN5	-	0.4663155	0.5541133	-0.08779782	-3.624947	10.96271	0.004013332	0.0381170927885754	-0.1411288	-0.03446686	0.02422044
chr11:100250463	CNTN5	-	0.5229294	0.6224162	-0.0994868	-3.638932	10.55805	0.004160772	0.0388702467824659	-0.1599695	-0.03900408	0.02733956
chr11:100269113	CNTN5	+	0.5572181	0.6526838	-0.09546565	-4.932115	10.38751	0.0005308918	0.0134376868962264	-0.1383762	-0.05255506	0.01935592
chr11:100326006	CNTN5	+	0.4952582	0.6063992	-0.111141	-6.257347	10.96275	6.289752e-05	0.00523442523000354	-0.1502504	-0.07203161	0.01776168
chr11:100332366	CNTN5	+	0.569821	0.6949843	-0.1251634	-8.684178	10.88004	3.203751e-06	0.00159631027539298	-0.1569285	-0.09339827	0.01441281
chr11:100799727	ARHGAP42	+	0.5472733	0.6560012	-0.1087279	-6.130966	10.70877	8.304391e-05	0.00588720158506376	-0.1478906	-0.06956526	0.01773423
chr11:100799875	ARHGAP42	+	0.5799606	0.6719577	-0.09199705	-4.117954	7.061068	0.004388091	0.0399964286782144	-0.1447314	-0.0392627	0.02234047
chr11:100904467	ARHGAP42	-	0.6120798	0.7003149	-0.0882351	-4.694721	10.99572	0.000656412	0.0148338731613399	-0.1296036	-0.04686664	0.01879453
chr11:100909285	ARHGAP42	-	0.5581804	0.6544603	-0.09627988	-6.523167	10.77077	4.736343e-05	0.00467561470733772	-0.1288503	-0.06370948	0.01475968
chr11:101077270	PGR	-	0.5721439	0.6558532	-0.08370932	-3.674787	9.22083	0.004910025	0.042569629846478	-0.1350523	-0.03236632	0.02277936
chr11:101146128	PGR-AS1	-	0.5062864	0.6399557	-0.1336692	-4.322828	10.9363	0.001225181	0.020273205959455	-0.2017758	-0.06556262	0.03092171
chr11:101202305	PGR-AS1	-	0.3489383	0.4492797	-0.1003414	-5.478914	10.63347	0.0002168822	0.00888326391783724	-0.1408207	-0.05986216	0.01831411
chr11:10126373	SBF2	-	0.5636105	0.6873305	-0.12372	-5.211289	10.98127	0.0002909921	0.0102014214270419	-0.175984	-0.07145605	0.02374077
chr11:101589930	AP003080.1	+	0.5385839	0.6414012	-0.1028173	-8.900731	9.932793	4.789707e-06	0.00190887367061694	-0.1285795	-0.07705524	0.01155156
chr11:101589930	TRPC6	+	0.5385839	0.6414012	-0.1028173	-8.900731	9.932793	4.789707e-06	0.00190887367061694	-0.1285795	-0.07705524	0.01155156
chr11:101656635	TRPC6	-	0.5722426	0.6779417	-0.1056991	-4.137133	9.252089	0.002386463	0.0287489853863423	-0.1632555	-0.04814266	0.02554887
chr11:101658849	TRPC6	-	0.5287859	0.6281655	-0.0993796	-3.813474	9.321601	0.003873751	0.0373759906220773	-0.1580231	-0.0407361	0.02606012
chr11:1017772	MUC6	+	0.4970668	0.5858614	-0.08879465	-3.816151	10.92953	0.002894968	0.031884263240959	-0.1400477	-0.03754155	0.02326812
chr11:101907127	ANGPTL5	-	0.472346	0.5572039	-0.08485786	-5.572066	10.99011	0.0001676951	0.00792310223558755	-0.1183807	-0.05133504	0.01522916
chr11:101951404	CEP126	+	0.477978	0.5772914	-0.09931332	-4.959383	9.59455	0.000645586	0.0147159864682129	-0.1441895	-0.05443718	0.02002534
chr11:102205800	YAP1	-	0.4658543	0.5834734	-0.1176191	-4.987755	7.67622	0.001208813	0.0201236407685139	-0.1724001	-0.06283803	0.02358157
chr11:102782880	WTAPP1	+	0.4986266	0.63061	-0.1319834	-5.020785	10.94466	0.0003956079	0.01171737661671	-0.1898773	-0.07408951	0.02628741
chr11:10282706	SBF2	-	0.4952047	0.5828729	-0.08766824	-3.994317	9.916865	0.002584011	0.0299901084225892	-0.1366276	-0.03870887	0.02194824
chr11:103227487	DYNC2H1	-	0.5866432	0.6900136	-0.1033704	-4.662433	10.89285	0.0007092191	0.0154174433078274	-0.1522269	-0.05451392	0.02217092
chr11:103310216	DYNC2H1	-	0.6532258	0.511424	0.1418018	28.84108	10.15951	4.414838e-11	4.9626402305e-06	0.1308701	0.1527336	0.004916661
chr11:10341873	AMPD3	+	0.6338313	0.7177198	-0.08388848	-5.338447	9.376694	0.000408926	0.0118880150897087	-0.1192196	-0.04855739	0.01571402
chr11:105017526	CASP5	+	0.6376904	0.7415434	-0.103853	-13.01327	6.973179	3.80429e-06	0.0017133758946873	-0.1227388	-0.08496731	0.007980551
chr11:105169361	CARD18	-	0.6614396	0.742516	-0.08107642	-6.132228	9.790657	0.000121233	0.00688322241588297	-0.1106211	-0.05153178	0.01322136
chr11:105171301	CARD18	-	0.567649	0.6525707	-0.08492171	-3.493989	9.443996	0.006305966	0.0489241145933614	-0.1395121	-0.0303313	0.02430509
chr11:105238248	CARD18	+	0.6006931	0.7039789	-0.1032858	-5.874877	10.2088	0.000143982	0.00741813219699182	-0.1423503	-0.06422141	0.01758094
chr11:105238285	CARD18	+	0.5440118	0.6393519	-0.09534003	-3.668991	9.229752	0.004946952	0.0427508568092806	-0.1539007	-0.03677938	0.02598535
chr11:105262490	CARD18	+	0.5874691	0.6754904	-0.08802127	-5.75535	8.831508	0.0002947125	0.0102489174316391	-0.1227192	-0.05332338	0.01529382
chr11:105307792	CARD18	+	0.6113143	0.6913304	-0.08001616	-4.179207	8.513393	0.002687932	0.0306284742566935	-0.1237083	-0.036324	0.01914625
chr11:105446521	CARD18	+	0.4720779	0.5919586	-0.1198807	-4.972315	10.43721	0.0004922935	0.0129599934711051	-0.1732968	-0.06646453	0.02410963
chr11:105446611	CARD18	+	0.5859951	0.681557	-0.0955619	-10.05155	10.85982	7.802722e-07	0.000932657241175973	-0.1165201	-0.07460373	0.009507183
chr11:105459837	CARD18	+	0.6021222	0.6827341	-0.08061195	-6.088492	9.292671	0.0001593265	0.00773522037121733	-0.1104198	-0.05080405	0.01324005
chr11:105464865	CARD18	+	0.6626984	0.5380147	0.1246837	4.905258	10.88174	0.0004827225	0.0128401498241735	0.06866395	0.1807034	0.02541838
chr11:105465999	CARD18	-	0.572249	0.6541577	-0.08190874	-6.493679	9.735319	7.861226e-05	0.00575073212576197	-0.1101175	-0.05369994	0.01261361
chr11:105666863	GRIA4	-	0.6091088	0.6923077	-0.08319889	-4.223454	10.92618	0.00144929	0.0220988773937377	-0.1265924	-0.03980536	0.01969925
chr11:105729031	GRIA4	+	0.5978771	0.7027796	-0.1049025	-5.726344	10.8619	0.0001395165	0.00732967463580568	-0.1452855	-0.06451937	0.01831927
chr11:105750399	GRIA4	+	0.5822682	0.6838053	-0.101537	-10.12644	10.36946	1.058048e-06	0.00104370906480447	-0.123771	-0.07930309	0.01002692
chr11:105901757	GRIA4	-	0.5098662	0.6712513	-0.1613851	-4.128357	10.39724	0.001887502	0.0253784698037385	-0.2480381	-0.074732	0.03909184
chr11:105901933	GRIA4	-	0.5955186	0.6970523	-0.1015337	-4.513307	7.01578	0.002738575	0.0309404627635813	-0.1547053	-0.04836212	0.02249652
chr11:105901954	GRIA4	-	0.636968	0.7276689	-0.09070089	-4.825883	7.09701	0.001836504	0.0250289999235167	-0.1350204	-0.04638141	0.01879467
chr11:10595638	LYVE1	-	0.5818096	0.6735065	-0.09169685	-4.545175	8.140204	0.001804343	0.0247863617461893	-0.1380803	-0.04531337	0.02017455
chr11:10595638	MRVI1	-	0.5818096	0.6735065	-0.09169685	-4.545175	8.140204	0.001804343	0.0247863617461893	-0.1380803	-0.04531337	0.02017455
chr11:10595638	MRVI1-AS1	-	0.5818096	0.6735065	-0.09169685	-4.545175	8.140204	0.001804343	0.0247863617461893	-0.1380803	-0.04531337	0.02017455
chr11:10613119	MRVI1	+	0.6123412	0.7020786	-0.08973741	-6.129278	9.996624	0.0001114728	0.00665297313159675	-0.1223606	-0.05711423	0.01464078
chr11:106693666	GUCY1A2	-	0.5994045	0.6846053	-0.0852008	-5.169031	9.227271	0.0005429526	0.0135783299014104	-0.1223483	-0.04805334	0.01648293
chr11:106752216	GUCY1A2	+	0.5940863	0.6964347	-0.1023485	-4.284063	10.78913	0.001347534	0.0212928944015764	-0.1550568	-0.04964013	0.02389051
chr11:106835934	GUCY1A2	+	0.565927	0.6494338	-0.08350682	-11.99995	10.57565	1.710019e-07	0.000519292544577253	-0.09889865	-0.068115	0.006958933
chr11:106897392	GUCY1A2	+	0.5779737	0.6803562	-0.1023825	-5.302491	9.165646	0.0004632677	0.0125904590851949	-0.145941	-0.05882393	0.01930837
chr11:106956208	GUCY1A2	-	0.569821	0.6735247	-0.1037037	-4.577066	10.96958	0.0007998118	0.0163743638695854	-0.1535889	-0.05381859	0.02265725
chr11:107939372	RAB39A	+	0.7181301	0.6189169	0.09921311	6.88679	10.21352	3.834109e-05	0.00430071353019393	0.06720462	0.1312216	0.01440629
chr11:108237615	ATM	-	0.6204669	0.5125794	0.1078876	5.985469	7.925005	0.0003410106	0.0109508605349017	0.06625347	0.1495217	0.01802492
chr11:108382629	C11orf65	+	0.4890728	0.5837236	-0.09465079	-7.791033	10.87882	8.975511e-06	0.00245646558756395	-0.1214262	-0.06787533	0.01214868
chr11:108417533	C11orf65	+	0.6101811	0.7113523	-0.1011711	-4.447259	10.1411	0.001198612	0.0200347454147717	-0.1517639	-0.05057842	0.0227491
chr11:109392639	AP003049.2	+	0.5414164	0.6245215	-0.08310515	-3.810897	10.83853	0.00296492	0.0322972425905772	-0.1311899	-0.03502035	0.02180724
chr11:109456772	AP003049.2	+	0.5545145	0.6561876	-0.1016731	-4.569641	10.58629	0.000886875	0.0172638128546897	-0.1508788	-0.05246733	0.02224969
chr11:109471899	AP003049.2	+	0.5837232	0.6659519	-0.08222869	-4.332154	10.91604	0.001211501	0.0201512742647856	-0.1240449	-0.04041252	0.01898102
chr11:109473821	AP003049.2	+	0.4178605	0.538891	-0.1210304	-4.055553	10.28724	0.00217355	0.0273373191617353	-0.1872743	-0.05478657	0.02984314
chr11:109525578	AP003049.2	+	0.5575032	0.6471072	-0.08960394	-6.557405	8.147685	0.0001632762	0.00782518456059886	-0.1210153	-0.05819259	0.01366454
chr11:109895329	RDX	+	0.4880952	0.6051261	-0.1170309	-4.310251	9.579639	0.001696724	0.0240265665898738	-0.1778905	-0.05617122	0.02715175
chr11:109912655	RDX	+	0.6167059	0.7099357	-0.09322975	-5.231845	7.478436	0.0009814095	0.0181353609315587	-0.1348262	-0.05163329	0.01781967
chr11:109924616	RDX	+	0.5792968	0.6663627	-0.08706588	-4.636531	10.93747	0.0007316029	0.0156679902983854	-0.1284253	-0.04570641	0.01877824
chr11:109935965	RDX	-	0.5473701	0.6383472	-0.09097706	-3.54957	8.801856	0.006444299	0.0495313312151034	-0.1491567	-0.03279738	0.02563045
chr11:110032273	RDX	-	0.5891427	0.6709668	-0.08182409	-8.311895	10.90741	4.791525e-06	0.00190887367061694	-0.1035135	-0.06013465	0.009844216
chr11:110210268	RDX	+	0.5341729	0.6173386	-0.08316576	-3.560191	9.563444	0.005555384	0.0456358442920174	-0.1355388	-0.03079276	0.02335992
chr11:110382875	LINC02732	-	0.5922628	0.8216411	-0.2293782	-7.668476	7.022575	0.0001173547	0.00679323902662018	-0.3000625	-0.158694	0.02991184
chr11:11059458	LINC02752	-	0.6082451	0.7177509	-0.1095057	-7.094859	7.748066	0.0001198185	0.00684544791899441	-0.1453003	-0.07371122	0.01543452
chr11:11063917	LINC02752	-	0.6399911	0.7281497	-0.08815862	-6.019361	10.95513	8.830417e-05	0.00604193862095898	-0.12041	-0.05590722	0.01464584
chr11:110697564	ARHGAP20	-	0.6215034	0.7023737	-0.08087034	-10.196	7.220284	1.520907e-05	0.00298415172678027	-0.09951016	-0.06223053	0.007931573
chr11:11111068	LINC02752	+	0.6715015	0.7689556	-0.09745411	-6.64761	10.5945	4.343572e-05	0.00452243697412294	-0.1298719	-0.0650363	0.01466002
chr11:111160964	LINC02550	-	0.5460465	0.6421026	-0.09605606	-4.427143	10.99744	0.001016986	0.018468253239056	-0.1438124	-0.04829976	0.02169707
chr11:111482298	BTG4	+	0.6042254	0.6945094	-0.09028401	-4.793116	8.424071	0.001183513	0.0199029598607007	-0.1333426	-0.04722537	0.01883618
chr11:111485502	BTG4	+	0.6354665	0.7291962	-0.09372974	-5.057718	6.325477	0.001983115	0.0260330009551847	-0.1385163	-0.04894315	0.01853202
chr11:111867689	ALG9	+	0.5208383	0.6129476	-0.09210925	-5.166835	9.040235	0.0005813392	0.0139918577799304	-0.1324094	-0.05180908	0.01782702
chr11:111867689	AP001781.2	+	0.5208383	0.6129476	-0.09210925	-5.166835	9.040235	0.0005813392	0.0139918577799304	-0.1324094	-0.05180908	0.01782702
chr11:112319363	LINC02762	-	0.6047319	0.6864394	-0.08170752	-3.930326	10.84018	0.002416723	0.028928808531188	-0.1275462	-0.03586882	0.02078899
chr11:112988201	NCAM1	-	0.5445206	0.6254905	-0.08096986	-4.934851	8.329427	0.001014892	0.0184463672673415	-0.1185473	-0.04339239	0.01640776
chr11:113262745	NCAM1	-	0.3545772	0.4929309	-0.1383538	-6.760018	10.96218	3.169188e-05	0.00398696732818684	-0.1834192	-0.09328839	0.02046648
chr11:11368626	GALNT18	-	0.618675	0.4399841	0.1786909	4.355886	10.7609	0.001204319	0.0200848393459148	0.08815481	0.269227	0.04102286
chr11:11368839	GALNT18	-	0.3253286	0.4426546	-0.117326	-3.448223	10.96455	0.005470093	0.0452565872979517	-0.1922442	-0.0424078	0.03402507
chr11:115389273	CADM1	+	0.4758236	0.6088592	-0.1330357	-5.494557	10.33969	0.0002342268	0.00920464624738249	-0.1867447	-0.07932666	0.02421226
chr11:115390407	CADM1	+	0.4552498	0.3565419	0.09870794	6.223991	10.30299	8.640052e-05	0.00598817865092784	0.06351164	0.1339042	0.01585927
chr11:115795613	LINC02698	+	0.6142794	0.7093895	-0.09511003	-3.784509	10.78176	0.003130998	0.0332646392790257	-0.1505608	-0.03965926	0.02513141
chr11:116942722	SIK3	+	0.6041776	0.7447123	-0.1405347	-5.165487	6.294591	0.001802489	0.0247745247378211	-0.2063586	-0.07471085	0.02720648
chr11:117059042	SIK3	+	0.6113184	0.6943896	-0.08307125	-6.512818	8.884573	0.000116387	0.00676389096738593	-0.1119824	-0.0541601	0.01275504
chr11:118048797	SMIM35	+	0.5915663	0.677046	-0.0854797	-5.011002	10.92635	0.0004037791	0.0118240742806872	-0.1230559	-0.0479035	0.01705841
chr11:118669681	TREH	+	0.6177249	0.7034442	-0.08571935	-5.438494	10.03478	0.0002820088	0.0100522974130127	-0.1208219	-0.05061682	0.0157616
chr11:118891991	CXCR5	+	0.3865771	0.2745109	0.1120661	3.672212	9.082977	0.005057614	0.043281622379087	0.04312715	0.1810051	0.03051734
chr11:119194599	CCDC153	+	0.6021095	0.7071881	-0.1050786	-3.625035	10.59927	0.004234263	0.0392177223550487	-0.1691739	-0.04098329	0.02898691
chr11:119476288	USP2-AS1	+	0.5991894	0.6943029	-0.09511356	-4.642459	10.9099	0.0007294508	0.0156404137118809	-0.1402523	-0.04997484	0.02048775
chr11:119609380	AP003393.1	-	0.5581348	0.6596282	-0.1014934	-6.839963	10.9871	2.817831e-05	0.00379965636859354	-0.134157	-0.06882985	0.0148383
chr11:120732324	GRIK4	-	0.6125553	0.6955827	-0.08302742	-8.395413	9.451623	1.104516e-05	0.00264381566181634	-0.1052374	-0.06081745	0.009889618
chr11:120768379	GRIK4	-	0.3016276	0.4009423	-0.09931463	-4.629734	9.227657	0.001158085	0.0197059323585088	-0.1476594	-0.0509699	0.02145148
chr11:121732634	AP001977.1	-	0.6125275	0.7033803	-0.09085277	-5.272143	8.900932	0.0005314173	0.0134449601192636	-0.1299019	-0.05180366	0.01723261
chr11:121877919	AP001977.1	+	0.6086464	0.7081842	-0.0995378	-4.911646	8.614476	0.0009481095	0.0178395618109034	-0.1456966	-0.05337901	0.02026567
chr11:121913391	AP001977.1	+	0.5471612	0.6419214	-0.09476025	-5.085414	8.755718	0.0007166034	0.0154988808997334	-0.1370926	-0.05242786	0.01863373
chr11:122082795	MIR100HG	+	0.4713471	0.5541588	-0.08281177	-3.938149	8.808642	0.003562428	0.03569781201217	-0.1305386	-0.03508493	0.0210281
chr11:122092309	MIR100HG	+	0.4772032	0.6329268	-0.1557236	-4.44779	9.030729	0.001591908	0.0232098253778769	-0.2348839	-0.07656322	0.03501145
chr11:122092705	MIR100HG	+	0.4716422	0.5673286	-0.09568638	-4.330313	10.98894	0.001196707	0.0200170781977433	-0.1443272	-0.04704552	0.02209687
chr11:122461260	MIR100HG	+	0.5284334	0.6632562	-0.1348228	-6.62957	9.011046	9.541561e-05	0.00623470635821372	-0.1808188	-0.08882687	0.02033659
chr11:122464145	MIR100HG	+	0.623792	0.7228447	-0.09905271	-8.423631	8.904481	1.563012e-05	0.00300986205861035	-0.1256968	-0.07240865	0.01175891
chr11:122838085	AP002762.2	+	0.5827843	0.674537	-0.09175269	-4.121893	10.47233	0.001878944	0.0253237193337917	-0.1410492	-0.04245622	0.02225984
chr11:122938274	JHY	-	0.5665765	0.687603	-0.1210266	-8.327412	7.362912	5.294674e-05	0.00488891296517927	-0.1550524	-0.08700068	0.01453351
chr11:12298083	MICAL2	-	0.5854384	0.6745649	-0.0891265	-4.12473	10.3154	0.00193061	0.0256776925631891	-0.137073	-0.04118002	0.02160784
chr11:12311886	MICAL2	-	0.5348009	0.6190218	-0.0842209	-4.653364	8.580479	0.001358821	0.0213815665862415	-0.1254707	-0.0429711	0.01809893
chr11:123649861	SCN3B	-	0.6213198	0.7172096	-0.09588983	-5.670616	7.235828	0.0006740863	0.0150261615099476	-0.1356128	-0.05616682	0.01690995
chr11:124246497	OR8G1	+	0.6059982	0.6954555	-0.08945728	-4.164913	9.199321	0.002316747	0.0282873143005329	-0.1378857	-0.04102889	0.02147879
chr11:124479412	OR8B9P	+	0.5976219	0.6850649	-0.08744307	-6.547722	10.86071	4.406289e-05	0.00454765502196139	-0.1168827	-0.05800345	0.01335473
chr11:124573464	OR8A1	+	0.5392142	0.6642044	-0.1249902	-7.425275	10.97812	1.332398e-05	0.00283175871131848	-0.1620486	-0.08793185	0.01683307
chr11:124691265	SIAE	-	0.5620473	0.6688568	-0.1068095	-4.821632	9.799599	0.0007419757	0.0157733263962131	-0.1563047	-0.05731428	0.02215215
chr11:124691265	SPA17	-	0.5620473	0.6688568	-0.1068095	-4.821632	9.799599	0.0007419757	0.0157733263962131	-0.1563047	-0.05731428	0.02215215
chr11:12644569	AC107881.1	+	0.5166856	0.6028248	-0.08613921	-4.545818	10.82529	0.0008704867	0.0171046721771741	-0.1279282	-0.04435023	0.01894911
chr11:126923664	KIRREL3	-	0.5882853	0.6727005	-0.08441523	-6.573491	10.72094	4.526085e-05	0.00459408669310469	-0.1127698	-0.05606068	0.01284177
chr11:126923664	AP002833.1	-	0.5882853	0.6727005	-0.08441523	-6.573491	10.72094	4.526085e-05	0.00459408669310469	-0.1127698	-0.05606068	0.01284177
chr11:127153881	AP001993.1	-	0.580156	0.7057388	-0.1255828	-6.484013	6.955818	0.0003483551	0.0110589247850106	-0.1714401	-0.07972559	0.01936807
chr11:127289634	LINC02712	+	0.6273346	0.7354412	-0.1081066	-5.38358	7.464884	0.0008300733	0.0166717551317992	-0.1549972	-0.06121597	0.0200808
chr11:127290917	LINC02712	+	0.5809078	0.6756726	-0.09476478	-7.697534	10.28592	1.398062e-05	0.00287951395029189	-0.1220925	-0.06743704	0.01231106
chr11:129075105	ARHGAP32	+	0.3920903	0.5476652	-0.1555749	-3.451758	10.94356	0.005450993	0.0451588505831386	-0.2548384	-0.05631137	0.0450712
chr11:129104021	ARHGAP32	+	0.5972154	0.7058532	-0.1086378	-5.46047	10.34084	0.0002459267	0.00942219628577633	-0.1527701	-0.06450554	0.01989532
chr11:129106097	ARHGAP32	+	0.6265819	0.713103	-0.08652112	-6.468451	8.488098	0.0001500054	0.00753749629203162	-0.1170599	-0.05598235	0.01337586
chr11:129106868	ARHGAP32	+	0.6066223	0.687651	-0.08102877	-4.914306	9.977138	0.0006141141	0.014368526905849	-0.1177785	-0.04427904	0.01648834
chr11:129169413	ARHGAP32	+	0.630903	0.7654538	-0.1345508	-13.25753	10.2403	8.894541e-08	0.000367035054885088	-0.1570925	-0.1120091	0.01014901
chr11:129185507	ARHGAP32	+	0.6002101	0.685938	-0.08572789	-6.524629	10.38993	5.594754e-05	0.0049962806268822	-0.1148554	-0.05660035	0.01313912
chr11:12928067	TEAD1	-	0.5900805	0.6993793	-0.1092988	-8.488115	10.46893	5.160766e-06	0.00196737823685035	-0.1378166	-0.08078102	0.01287669
chr11:129767831	AP003327.2	+	0.4124718	0.5163518	-0.10388	-5.591547	10.97257	0.0001638483	0.00783632202592517	-0.1447825	-0.06297753	0.01857804
chr11:129852135	TMEM45B	-	0.607922	0.7445286	-0.1366066	-6.282587	7.7565	0.0002698302	0.00985413235041652	-0.187023	-0.08619026	0.02174369
chr11:131670484	NTM	-	0.5849108	0.6684535	-0.08354276	-5.60243	8.752942	0.0003685298	0.0113582671073597	-0.1174215	-0.04966405	0.01491188
chr11:131982105	AP000844.1	+	0.4996999	0.5942359	-0.09453599	-4.506261	7.994085	0.001989298	0.026077845995207	-0.1429194	-0.04615254	0.02097881
chr11:131982105	NTM	+	0.4996999	0.5942359	-0.09453599	-4.506261	7.994085	0.001989298	0.026077845995207	-0.1429194	-0.04615254	0.02097881
chr11:132505837	OPCML	+	0.5303437	0.6315388	-0.1011951	-4.421365	10.89969	0.001049023	0.018751887717785	-0.1516273	-0.05076288	0.02288775
chr11:132582406	OPCML	+	0.5026252	0.5904543	-0.08782917	-6.876417	8.732533	8.397575e-05	0.00591733856113941	-0.1168581	-0.05880026	0.01277252
chr11:132647080	OPCML	+	0.5966914	0.702963	-0.1062716	-3.947326	10.60379	0.002449041	0.0291323170268881	-0.1657987	-0.04674447	0.02692242
chr11:132759783	OPCML	-	0.42274	0.5174337	-0.09469372	-4.018468	6.525508	0.005860999	0.046968073398142	-0.1512472	-0.03814025	0.02356463
chr11:132807247	OPCML	+	0.5995748	0.6830826	-0.08350781	-4.287722	7.767076	0.002847504	0.0316001963519698	-0.1286551	-0.03836048	0.01947603
chr11:133130537	OPCML	+	0.5706192	0.6543214	-0.08370217	-3.521229	10.90585	0.00484976	0.0422838451986137	-0.1360763	-0.03132799	0.02377073
chr11:133396470	OPCML	-	0.6023491	0.7279346	-0.1255855	-5.03507	8.537889	0.0008272556	0.0166454847673444	-0.1824775	-0.06869345	0.02494216
chr11:133450715	OPCML	+	0.5232935	0.6189574	-0.09566388	-3.861198	8.137096	0.004647765	0.0412781021971833	-0.1526296	-0.03869813	0.0247757
chr11:13425514	BTBD10	+	0.6672659	0.7573595	-0.09009362	-15.81523	9.212321	5.468228e-08	0.000260714396268919	-0.1029352	-0.07725206	0.005696638
chr11:134305956	GLB1L3	+	0.5986254	0.6903793	-0.0917539	-5.940367	10.98575	9.77813e-05	0.00631039945358515	-0.1257553	-0.05775247	0.01544583
chr11:134440340	AP004608.1	-	0.4683364	0.349453	0.1188834	5.059507	6.719147	0.001654863	0.0237184257104991	0.06284749	0.1749194	0.02349704
chr11:134966259	AP003062.2	+	0.5453	0.7879924	-0.2426924	-4.542433	9.385605	0.001258635	0.0205636621894608	-0.3628019	-0.1225829	0.05342784
chr11:14105626	SPON1	-	0.4294384	0.5104716	-0.08103316	-3.866502	9.469389	0.003461723	0.0351301887677251	-0.128087	-0.03397927	0.02095775
chr11:14173255	SPON1	-	0.7516552	0.6318633	0.1197919	12.78716	8.5939	6.891302e-07	0.000899325027377224	0.09844607	0.1411378	0.009368142
chr11:15019335	CALCB	+	0.5089139	0.608315	-0.09940108	-3.543907	10.60004	0.004866731	0.0423643103943278	-0.1614207	-0.03738148	0.02804845
chr11:15163751	INSC	-	0.371876	0.4617317	-0.08985576	-4.022365	10.98459	0.002013579	0.0262416071228184	-0.1390321	-0.04067945	0.02233904
chr11:15554986	LINC02751	-	0.5994336	0.7011464	-0.1017128	-4.025072	10.58327	0.002158539	0.0272480843532979	-0.1575997	-0.04582596	0.02526982
chr11:16230045	SOX6	+	0.60005	0.691144	-0.09109402	-3.875308	8.541234	0.004151474	0.0388245047379163	-0.1447075	-0.03748057	0.02350627
chr11:16436149	SOX6	-	0.6020776	0.6984301	-0.09635245	-4.830909	9.765187	0.0007392492	0.0157438236574412	-0.1409379	-0.05176696	0.01994499
chr11:16446057	SOX6	+	0.4952381	0.6101399	-0.1149018	-5.822262	8.419002	0.0003256561	0.0106992243626967	-0.1600193	-0.06978424	0.0197349
chr11:16446592	SOX6	-	0.6263225	0.7275463	-0.1012238	-4.460116	10.97449	0.0009679464	0.0180129979947255	-0.1511901	-0.05125757	0.02269534
chr11:16467009	SOX6	+	0.6237745	0.7562229	-0.1324485	-3.880829	10.94823	0.00258201	0.0299754170577638	-0.207609	-0.05728787	0.03412891
chr11:16547609	SOX6	+	0.6315328	0.7179602	-0.08642738	-5.943716	10.95629	9.838031e-05	0.0063276447039331	-0.1184474	-0.05440735	0.01454097
chr11:16593006	SOX6	+	0.6316437	0.7999906	-0.168347	-7.540249	6.82746	0.0001504255	0.00754273824372913	-0.2214123	-0.1152816	0.02232645
chr11:16948152	PLEKHA7	+	0.5940676	0.693104	-0.09903639	-5.67676	10.89802	0.000148149	0.00749868155907037	-0.1374785	-0.06059426	0.01744594
chr11:1742562	IFITM10	+	0.5999825	0.7088493	-0.1088668	-7.472253	10.07447	2.043168e-05	0.00336107602645688	-0.1412971	-0.07643647	0.01456947
chr11:1742562	AC068580.4	+	0.5999825	0.7088493	-0.1088668	-7.472253	10.07447	2.043168e-05	0.00336107602645688	-0.1412971	-0.07643647	0.01456947
chr11:18165577	AC090099.1	+	0.4996511	0.607741	-0.10809	-5.080579	10.2262	0.0004452443	0.0123674283222721	-0.1553521	-0.06082777	0.02127513
chr11:18182347	AC090099.1	+	0.6107006	0.7288845	-0.1181839	-6.901827	10.72525	2.937388e-05	0.00386132463325261	-0.1559907	-0.08037706	0.01712357
chr11:18235863	SAA2-SAA4	-	0.5266026	0.6240615	-0.09745899	-4.609769	8.406298	0.0015222	0.0226764962315536	-0.145805	-0.04911295	0.02114184
chr11:18235863	SAA4	-	0.5266026	0.6240615	-0.09745899	-4.609769	8.406298	0.0015222	0.0226764962315536	-0.145805	-0.04911295	0.02114184
chr11:1861904	LSP1	+	0.6562493	0.5727919	0.0834574	3.412007	10.85442	0.005912923	0.047216864191035	0.02953327	0.1373815	0.02445991
chr11:20600477	SLC6A5	+	0.3890671	0.5224603	-0.1333932	-4.190723	8.146511	0.002915045	0.032002952649205	-0.2065655	-0.06022088	0.03183059
chr11:20791292	NELL1	-	0.4917174	0.5804332	-0.08871575	-6.683741	10.26795	4.820603e-05	0.00471424595964256	-0.1181864	-0.05924513	0.01327337
chr11:20792186	NELL1	-	0.5200936	0.600863	-0.08076934	-5.003483	10.73909	0.0004305753	0.0121789795091795	-0.1164046	-0.04513407	0.01614262
chr11:20793303	NELL1	-	0.5617683	0.655122	-0.0933537	-5.424408	10.99963	0.0002088013	0.00872853773791469	-0.1312327	-0.05547474	0.01720993
chr11:20817417	NELL1	-	0.638018	0.7202231	-0.08220506	-6.977633	10.63302	2.786319e-05	0.00378020007885391	-0.108245	-0.05616515	0.01178123
chr11:20972572	NELL1	+	0.4799273	0.5748946	-0.09496735	-3.82872	6.966535	0.006527615	0.0498977761103769	-0.1536765	-0.03625818	0.02480394
chr11:21177806	NELL1	-	0.5401621	0.6205879	-0.08042583	-4.516934	9.45518	0.001282731	0.0207743835020656	-0.1204108	-0.04044086	0.0178054
chr11:21275226	NELL1	+	0.5911606	0.6740245	-0.08286387	-3.710004	9.647326	0.004297224	0.0395200202819664	-0.1328776	-0.03285013	0.02233525
chr11:21357432	NELL1	-	0.5658839	0.6635085	-0.09762454	-3.940736	7.483451	0.004900053	0.0425200927058585	-0.1554453	-0.03980379	0.02477318
chr11:21425786	NELL1	+	0.6357312	0.7212373	-0.08550613	-4.739411	8.729304	0.001152771	0.019658768041713	-0.1265126	-0.04449966	0.01804151
chr11:21431271	NELL1	-	0.5801486	0.66762	-0.08747137	-4.491986	10.81339	0.00095274	0.0178783784854803	-0.130421	-0.0445217	0.01947276
chr11:21438097	NELL1	-	0.5748821	0.6567982	-0.08191617	-5.265112	10.69551	0.0002923443	0.0102203909101516	-0.1162791	-0.04755327	0.01555829
chr11:21438386	NELL1	-	0.6579136	0.7427212	-0.08480765	-3.720403	10.92809	0.003416853	0.0348725186458439	-0.1350201	-0.03459525	0.02279529
chr11:21836168	ANO5	+	0.5730984	0.6551932	-0.08209489	-4.574879	8.951822	0.001356263	0.0213655401961244	-0.122722	-0.0414678	0.01794471
chr11:21836168	AC130307.1	+	0.5730984	0.6551932	-0.08209489	-4.574879	8.951822	0.001356263	0.0213655401961244	-0.122722	-0.0414678	0.01794471
chr11:21840365	AC130307.1	-	0.6079058	0.688512	-0.08060616	-5.622351	9.130262	0.0003082687	0.0104446854696308	-0.1129677	-0.04824461	0.01433674
chr11:21840365	ANO5	-	0.6079058	0.688512	-0.08060616	-5.622351	9.130262	0.0003082687	0.0104446854696308	-0.1129677	-0.04824461	0.01433674
chr11:21919209	ANO5	+	0.6458617	0.7418616	-0.09599995	-7.98334	7.795917	5.12429e-05	0.00482195700755496	-0.1238566	-0.0681433	0.01202504
chr11:22081352	ANO5	-	0.5343265	0.6630719	-0.1287454	-5.053878	9.297094	0.0006214587	0.0144522085025212	-0.1860935	-0.07139742	0.02547459
chr11:22081352	AC116534.1	-	0.5343265	0.6630719	-0.1287454	-5.053878	9.297094	0.0006214587	0.0144522085025212	-0.1860935	-0.07139742	0.02547459
chr11:22222569	ANO5	-	0.5092866	0.618482	-0.1091954	-5.868562	10.96468	0.0001093285	0.00660214087270004	-0.1501649	-0.06822595	0.01860685
chr11:22229148	ANO5	-	0.5783201	0.6804943	-0.1021742	-5.309483	9.528288	0.0004031474	0.0118169524700777	-0.1453414	-0.05900705	0.01924372
chr11:22264538	ANO5	+	0.5641578	0.6553673	-0.0912095	-4.854769	10.85298	0.0005268515	0.0133872833346237	-0.1326292	-0.04978981	0.01878761
chr11:22278294	ANO5	-	0.5624907	0.6568579	-0.09436723	-4.868023	8.823471	0.0009380033	0.0177446327235999	-0.1383535	-0.05038093	0.01938512
chr11:22329210	AC104009.1	+	0.6055389	0.710832	-0.1052931	-6.728361	8.628056	0.0001045339	0.00650525659359845	-0.140928	-0.06965829	0.01564915
chr11:22329584	AC104009.1	+	0.6583208	0.7451288	-0.08680793	-5.423708	9.677913	0.0003265877	0.010716192126924	-0.1226314	-0.05098442	0.01600527
chr11:22493231	AC055878.1	-	0.5480308	0.6472611	-0.09923034	-4.805033	10.58838	0.0006111801	0.0143445890525029	-0.1449001	-0.05356054	0.02065133
chr11:23754643	LINC02726	-	0.5541793	0.661971	-0.1077917	-6.410768	9.97095	7.827382e-05	0.00574656108762222	-0.1452708	-0.0703126	0.01681416
chr11:23807772	AC100768.1	-	0.4325761	0.5280342	-0.09545806	-4.652309	10.80492	0.0007365686	0.0157170940778675	-0.1407185	-0.05019763	0.02051843
chr11:24606737	LUZP2	-	0.4905129	0.5931752	-0.1026623	-7.643534	10.9579	1.027868e-05	0.00257477652316643	-0.1322382	-0.07308642	0.01343126
chr11:24625680	LUZP2	+	0.4206167	0.5164091	-0.09579231	-5.173589	9.680535	0.0004627437	0.0125856448503314	-0.137233	-0.0543516	0.01851564
chr11:24647907	LUZP2	-	0.5127982	0.6198459	-0.1070477	-6.383232	10.99981	5.200169e-05	0.00484860102050079	-0.1439587	-0.07013682	0.01677015
chr11:24702338	LUZP2	+	0.5084376	0.6184469	-0.1100092	-5.672996	10.31398	0.0001832948	0.00822792305458765	-0.1530391	-0.06697938	0.01939173
chr11:24733492	LUZP2	+	0.6331571	0.7151753	-0.08201819	-3.905716	10.27286	0.002787974	0.0312518479011453	-0.1286401	-0.03539623	0.02099953
chr11:24757587	LUZP2	+	0.5657938	0.6642808	-0.09848703	-6.246947	9.976086	9.642827e-05	0.00627010341885827	-0.1336265	-0.06334761	0.01576563
chr11:24843016	LUZP2	+	0.5143458	0.5975802	-0.08323444	-5.375716	9.230962	0.0004100937	0.0119063777921621	-0.1181272	-0.04834166	0.01548341
chr11:24883238	LUZP2	+	0.2759482	0.4623516	-0.1864034	-3.762477	10.97903	0.003151457	0.0333825468767545	-0.2954716	-0.07733514	0.04954273
chr11:24947819	LUZP2	-	0.3575608	0.5304871	-0.1729263	-3.35026	10.90107	0.006552879	0.0499977681920461	-0.2866578	-0.05919482	0.05161578
chr11:25017611	LUZP2	-	0.3906851	0.4718147	-0.08112957	-4.177106	10.13096	0.001843676	0.0250883886784557	-0.1243297	-0.03792939	0.01942243
chr11:25062845	LUZP2	-	0.4209917	0.5199726	-0.09898088	-9.651804	9.725027	2.711512e-06	0.0015107589919128	-0.1219187	-0.07604306	0.01025517
chr11:25073646	LUZP2	-	0.4799142	0.5877306	-0.1078164	-4.272593	10.5037	0.001458834	0.022162423052422	-0.1636789	-0.05195397	0.02523442
chr11:25739786	LINC02699	+	0.580652	0.6802191	-0.0995671	-4.651769	10.68531	0.0007593044	0.0159460468741258	-0.1468471	-0.05228708	0.02140413
chr11:2608709	KCNQ1OT1	-	0.6290247	0.7153714	-0.08634668	-3.942457	9.873632	0.002832686	0.031506610535765	-0.1352316	-0.03746177	0.02190174
chr11:2608709	KCNQ1	-	0.6290247	0.7153714	-0.08634668	-3.942457	9.873632	0.002832686	0.031506610535765	-0.1352316	-0.03746177	0.02190174
chr11:2611281	KCNQ1OT1	-	0.5856061	0.6679187	-0.08231263	-6.590226	10.06348	5.972863e-05	0.00513857739942087	-0.1101186	-0.05450672	0.01249011
chr11:2611281	KCNQ1	-	0.5856061	0.6679187	-0.08231263	-6.590226	10.06348	5.972863e-05	0.00513857739942087	-0.1101186	-0.05450672	0.01249011
chr11:26320520	ANO3	-	0.5308322	0.6328911	-0.1020588	-6.510062	9.895995	7.14438e-05	0.005524133882643	-0.1370394	-0.06707827	0.01567709
chr11:26320520	ANO3-AS1	-	0.5308322	0.6328911	-0.1020588	-6.510062	9.895995	7.14438e-05	0.005524133882643	-0.1370394	-0.06707827	0.01567709
chr11:26358838	ANO3	-	0.5415568	0.6302004	-0.08864352	-7.897668	8.620787	3.142577e-05	0.00397974214177136	-0.1142053	-0.06308176	0.01122401
chr11:26452281	ANO3	+	0.6029244	0.6960115	-0.09308704	-5.567953	10.56743	0.0001947302	0.00846542059560182	-0.1300685	-0.05610557	0.01671836
chr11:27070590	BBOX1	-	0.6336935	0.7386392	-0.1049457	-4.163918	10.9895	0.001582071	0.0231299009651922	-0.1604249	-0.04946649	0.02520359
chr11:27070590	BBOX1-AS1	-	0.6336935	0.7386392	-0.1049457	-4.163918	10.9895	0.001582071	0.0231299009651922	-0.1604249	-0.04946649	0.02520359
chr11:27095620	BBOX1	-	0.5498675	0.6674865	-0.1176191	-4.411312	7.002393	0.003111291	0.0331498326228332	-0.1806629	-0.05457533	0.02666306
chr11:27095620	BBOX1-AS1	-	0.5498675	0.6674865	-0.1176191	-4.411312	7.002393	0.003111291	0.0331498326228332	-0.1806629	-0.05457533	0.02666306
chr11:27134204	BBOX1-AS1	+	0.6359858	0.7194935	-0.08350773	-5.315914	10.30413	0.0003071223	0.0104246344698639	-0.11837	-0.04864541	0.01570901
chr11:27141797	BBOX1-AS1	+	0.6532354	0.8155988	-0.1623634	-27.42188	5.912428	1.852898e-07	0.000538959345375486	-0.1769037	-0.1478232	0.005920944
chr11:27764482	AC103796.1	-	0.5457314	0.6451648	-0.09943341	-6.229987	10.7763	7.045617e-05	0.00549581483752625	-0.1346513	-0.06421552	0.01596045
chr11:27776050	AC103796.1	+	0.5788059	0.6758586	-0.09705267	-4.590525	8.69345	0.001431587	0.0219680300266397	-0.1451374	-0.04896793	0.02114195
chr11:27825473	AC103796.1	-	0.5600212	0.6436573	-0.08363604	-4.096989	10.98497	0.001773399	0.0245786859703618	-0.1285745	-0.03869756	0.02041403
chr11:27844508	AC103796.1	-	0.641403	0.727782	-0.08637906	-6.578695	10.82754	4.288265e-05	0.0044988847357642	-0.1153345	-0.0574236	0.01313012
chr11:28824296	LINC02742	-	0.6169446	0.7057255	-0.08878091	-5.05895	10.88584	0.0003789278	0.0115048714837141	-0.1274561	-0.05010574	0.01754928
chr11:28881468	LINC02742	-	0.4889623	0.5892883	-0.100326	-3.553057	10.81208	0.004647885	0.0412781021971833	-0.1626062	-0.03804578	0.02823652
chr11:28970585	LINC02742	-	0.4705621	0.5793725	-0.1088104	-7.418724	9.569985	2.884702e-05	0.00383775772203997	-0.1416907	-0.07593016	0.014667
chr11:29012691	LINC02742	-	0.5116378	0.5932791	-0.0816413	-5.629743	10.76407	0.0001662642	0.00789021584662453	-0.1136451	-0.04963753	0.01450178
chr11:29038291	LINC02742	-	0.5441828	0.6299678	-0.08578502	-3.883832	7.431595	0.005362101	0.0447389976624812	-0.1374055	-0.03416449	0.02208773
chr11:29063607	LINC02742	+	0.5923524	0.7098545	-0.1175021	-7.658584	6.692222	0.0001511516	0.00756063367590558	-0.1541225	-0.08088179	0.01534254
chr11:29246045	AC090791.1	+	0.4971868	0.6343718	-0.137185	-5.40844	10.37884	0.0002618116	0.00969704630871779	-0.1934233	-0.08094666	0.02536498
chr11:29372798	LINC02755	-	0.3590253	0.2165551	0.1424701	4.793133	10.88984	0.0005754945	0.0139357948355353	0.07696767	0.2079726	0.0297238
chr11:29412998	LINC02755	-	0.5715774	0.6574402	-0.08586276	-6.180507	8.716742	0.0001859055	0.00829160151017635	-0.1174462	-0.05427935	0.01389251
chr11:29418713	LINC02755	+	0.5791602	0.7008022	-0.121642	-3.890791	10.7787	0.00261267	0.0301755517243355	-0.1906265	-0.05265743	0.03126407
chr11:29540664	LINC02755	+	0.5372546	0.6737876	-0.136533	-5.600256	8.554003	0.0004014387	0.0117910921193182	-0.1921253	-0.08094064	0.02437978
chr11:29540664	AC110058.1	+	0.5372546	0.6737876	-0.136533	-5.600256	8.554003	0.0004014387	0.0117910921193182	-0.1921253	-0.08094064	0.02437978
chr11:29541434	AC110058.1	+	0.686028	0.6022588	0.08376924	5.467388	8.29381	0.0005266543	0.0133867203089528	0.04865421	0.1188843	0.01532162
chr11:29541434	LINC02755	+	0.686028	0.6022588	0.08376924	5.467388	8.29381	0.0005266543	0.0133867203089528	0.04865421	0.1188843	0.01532162
chr11:29598348	LINC02546	+	0.6578583	0.743273	-0.08541474	-7.772737	8.487498	3.873943e-05	0.00431642155187905	-0.1105043	-0.06032515	0.01098902
chr11:29598348	LINC02755	+	0.6578583	0.743273	-0.08541474	-7.772737	8.487498	3.873943e-05	0.00431642155187905	-0.1105043	-0.06032515	0.01098902
chr11:29794407	LINC02755	+	0.6237607	0.7303455	-0.1065848	-4.560015	6.782128	0.002823612	0.0314557625174847	-0.162217	-0.05095262	0.02337379
chr11:29794407	AC107973.1	+	0.6237607	0.7303455	-0.1065848	-4.560015	6.782128	0.002823612	0.0314557625174847	-0.162217	-0.05095262	0.02337379
chr11:30476718	MPPED2	-	0.5593062	0.6591443	-0.09983805	-4.225969	10.09031	0.0017203	0.0241914723390263	-0.1524138	-0.04726232	0.02362489
chr11:30558148	MPPED2	-	0.6141593	0.6970215	-0.08286227	-3.686184	10.32785	0.003982097	0.0379539770497461	-0.1327342	-0.03299029	0.02247915
chr11:30613017	MPPED2-AS1	-	0.5748666	0.6574539	-0.08258736	-4.242838	6.377412	0.004725549	0.0416579769956275	-0.1295418	-0.0356329	0.01946512
chr11:30619328	MPPED2-AS1	-	0.6033492	0.6936975	-0.09034822	-4.787946	10.94201	0.0005725683	0.0139083130237768	-0.1319075	-0.04878891	0.01886993
chr11:30623472	MPPED2-AS1	-	0.6292211	0.7092962	-0.08007514	-8.577512	10.23435	5.453052e-06	0.00202189427985325	-0.1008115	-0.05933879	0.009335474
chr11:30776480	AL122014.1	-	0.571253	0.6727307	-0.1014778	-6.551883	9.357499	8.780964e-05	0.00602535044714175	-0.1363118	-0.06664371	0.01548834
chr11:30812711	AL122014.1	-	0.5797991	0.6712589	-0.09145983	-7.061969	8.125403	9.815997e-05	0.00632480778364682	-0.1212449	-0.06167472	0.01295104
chr11:30840204	DCDC1	-	0.5983142	0.6911771	-0.09286291	-4.621882	7.81409	0.001814773	0.0248599015784059	-0.1393877	-0.04633807	0.02009201
chr11:30840204	AL122014.1	-	0.5983142	0.6911771	-0.09286291	-4.621882	7.81409	0.001814773	0.0248599015784059	-0.1393877	-0.04633807	0.02009201
chr11:30950799	DCDC1	+	0.4979857	0.614036	-0.1160503	-5.477646	6.971782	0.0009409875	0.0177699971782503	-0.1661887	-0.06591183	0.02118615
chr11:30975572	DCDC1	+	0.5303855	0.6241411	-0.09375564	-4.389589	7.044118	0.003149144	0.033364056070147	-0.1441967	-0.04331454	0.02135864
chr11:31053096	DCDC1	+	0.587108	0.6784311	-0.09132312	-6.882703	7.619138	0.000159242	0.00773289716261785	-0.1221886	-0.06045763	0.0132685
chr11:31326224	DCDC1	+	0.5443478	0.6348812	-0.0905334	-6.500214	10.45751	5.604741e-05	0.00499780299391585	-0.1213833	-0.05968348	0.01392776
chr11:31868399	PAUPAR	-	0.6731668	0.7584592	-0.08529243	-8.114929	8.072486	3.740975e-05	0.00426122896	-0.109492	-0.06109287	0.01051056
chr11:31868399	AL035078.4	-	0.6731668	0.7584592	-0.08529243	-8.114929	8.072486	3.740975e-05	0.00426122896	-0.109492	-0.06109287	0.01051056
chr11:32241550	THEM7P	+	0.5233653	0.6520771	-0.1287118	-5.138652	7.86149	0.0009362544	0.0177290112050236	-0.1866497	-0.07077392	0.02504778
chr11:32275821	THEM7P	-	0.6254558	0.7221777	-0.09672198	-6.195596	9.157354	0.0001484498	0.00750636865804371	-0.1319452	-0.06149881	0.01561141
chr11:32946213	QSER1	-	0.4276003	0.2577286	0.1698717	6.082207	6.853061	0.0005425312	0.0135730899951073	0.1035413	0.2362021	0.02792929
chr11:33549897	KIAA1549L	+	0.6542487	0.738398	-0.08414934	-4.17986	9.568164	0.002078619	0.0266773306790528	-0.1292824	-0.0390163	0.0201321
chr11:33629731	KIAA1549L	-	0.5365953	0.6280872	-0.09149186	-4.718101	9.682458	0.0008942599	0.0173305068395952	-0.134892	-0.04809168	0.01939167
chr11:34466775	CAT	+	0.6165478	0.7485695	-0.1320218	-6.600463	6.679641	0.0003716052	0.0114057257634624	-0.1797825	-0.08426104	0.02000189
chr11:34551267	AL137224.1	-	0.5648318	0.6562268	-0.09139498	-9.020711	10.99991	2.049647e-06	0.00137090299606161	-0.1136947	-0.06909528	0.01013168
chr11:3544924	AC127526.2	+	0.5529339	0.6849112	-0.1319772	-7.189146	6.192389	0.0003174291	0.0105728143766638	-0.1765611	-0.08739335	0.01835785
chr11:36219808	LDLRAD3	+	0.5280806	0.6273334	-0.09925275	-3.960816	10.50054	0.002439974	0.0290680733651297	-0.1547283	-0.04377723	0.02505867
chr11:39051795	AC021723.2	-	0.5580965	0.6457363	-0.0876398	-7.452385	10.53288	1.628987e-05	0.00305144065299894	-0.1136641	-0.06161554	0.01175997
chr11:40314453	LRRC4C	+	0.5396209	0.660205	-0.1205841	-4.385538	10.4623	0.001226317	0.0202832310539578	-0.1814837	-0.05968452	0.02749586
chr11:40332560	LRRC4C	-	0.6171887	0.7025877	-0.08539897	-4.364608	8.556377	0.002042784	0.0264315789436336	-0.1300132	-0.04078475	0.01956624
chr11:40364268	LRRC4C	+	0.4761421	0.5989773	-0.1228352	-7.345575	10.84771	1.574291e-05	0.00301295044693518	-0.159704	-0.08596647	0.01672235
chr11:40373253	LRRC4C	+	0.58152	0.7314367	-0.1499168	-6.794662	10.42263	3.89099e-05	0.0043253413845645	-0.1988093	-0.1010242	0.0220639
chr11:40382428	LRRC4C	-	0.5780267	0.6854944	-0.1074677	-5.975322	10.05044	0.000133772	0.00717717497110706	-0.1475141	-0.06742129	0.01798526
chr11:40470719	AC090720.1	+	0.603933	0.6927568	-0.08882375	-3.505453	10.30454	0.005424248	0.0450341118867658	-0.1450566	-0.03259089	0.02533874
chr11:40470719	LRRC4C	+	0.603933	0.6927568	-0.08882375	-3.505453	10.30454	0.005424248	0.0450341118867658	-0.1450566	-0.03259089	0.02533874
chr11:40528146	LRRC4C	+	0.6372338	0.7215212	-0.0842874	-6.547547	8.381296	0.0001454577	0.00743564158463655	-0.1137394	-0.05483536	0.01287313
chr11:40795524	LRRC4C	+	0.627466	0.7124558	-0.08498979	-5.487265	9.517001	0.0003175304	0.0105738821993393	-0.1197393	-0.05024026	0.01548855
chr11:40848386	LRRC4C	-	0.5460812	0.6426318	-0.09655061	-4.373729	8.152356	0.00226408	0.0279381311345831	-0.1472908	-0.0458104	0.02207512
chr11:41701170	LINC02741	+	0.5894901	0.6802116	-0.09072143	-4.99739	9.385327	0.0006534723	0.0148029831913483	-0.1315325	-0.04991035	0.01815376
chr11:41740131	LINC01499	+	0.5080442	0.597519	-0.08947489	-4.215238	10.9995	0.001448082	0.0220904821443705	-0.1361944	-0.04275535	0.02122654
chr11:41824412	LINC01499	+	0.5617268	0.6525128	-0.09078604	-3.75329	8.631064	0.004883082	0.0424432894456968	-0.1458626	-0.03570949	0.02418839
chr11:41824442	LINC01499	+	0.5900969	0.6812354	-0.09113857	-7.291922	10.72451	1.79302e-05	0.00317335758138952	-0.1187342	-0.06354295	0.01249857
chr11:41859530	AC023442.3	+	0.5885481	0.6759623	-0.08741412	-6.34688	10.22489	7.594023e-05	0.00567108521494867	-0.1180105	-0.05681772	0.01377277
chr11:42031515	LINC02745	+	0.5357504	0.6279585	-0.09220808	-3.970682	9.244589	0.003082735	0.03298426902993	-0.1445293	-0.03988686	0.02322223
chr11:42133245	LINC02745	+	0.5812792	0.6897109	-0.1084317	-5.825005	10.63398	0.0001314017	0.00712147761747312	-0.1495755	-0.06728794	0.01861487
chr11:42230810	LINC02740	+	0.4372479	0.5391282	-0.1018803	-5.50105	10.50509	0.0002192583	0.00892429857129261	-0.1428784	-0.06088217	0.01852015
chr11:43190621	HNRNPKP3	-	0.5100761	0.6015234	-0.09144735	-3.988663	10.99795	0.00212781	0.0270362458807059	-0.1419101	-0.04098462	0.02292682
chr11:43204016	HNRNPKP3	-	0.6203509	0.7017933	-0.08144248	-4.951757	10.93036	0.0004427133	0.0123359514716091	-0.1176707	-0.0452143	0.01644719
chr11:43204067	HNRNPKP3	-	0.596741	0.6791599	-0.08241886	-3.945519	6.534925	0.006385076	0.0492659598338509	-0.1325357	-0.03230204	0.02088923
chr11:43386265	TTC17	+	0.5612219	0.6799604	-0.1187385	-5.734057	10.66586	0.0001479385	0.00749447795588341	-0.1644905	-0.07298662	0.0207076
chr11:43588918	AC068205.1	-	0.5822711	0.6655855	-0.08331444	-7.205984	9.756911	3.310629e-05	0.00406622966979638	-0.1091631	-0.05746579	0.01156184
chr11:43588918	AC068205.2	-	0.5822711	0.6655855	-0.08331444	-7.205984	9.756911	3.310629e-05	0.00406622966979638	-0.1091631	-0.05746579	0.01156184
chr11:43600503	AC068205.2	-	0.555751	0.7215494	-0.1657984	-7.87612	8.960107	2.571994e-05	0.00366129616735929	-0.2134508	-0.1181459	0.02105077
chr11:43600503	AC068205.1	-	0.555751	0.7215494	-0.1657984	-7.87612	8.960107	2.571994e-05	0.00366129616735929	-0.2134508	-0.1181459	0.02105077
chr11:43614456	AC068205.2	-	0.618359	0.7058507	-0.08749171	-6.03885	9.712045	0.0001414943	0.00736579346222796	-0.1199035	-0.05507991	0.01448814
chr11:43614456	AC068205.1	-	0.618359	0.7058507	-0.08749171	-6.03885	9.712045	0.0001414943	0.00736579346222796	-0.1199035	-0.05507991	0.01448814
chr11:43658158	AC068205.1	-	0.41803	0.6886625	-0.2706325	-3.847762	10.96701	0.002724689	0.0308609297353933	-0.4254956	-0.1157693	0.07033503
chr11:43658158	AC068205.2	-	0.41803	0.6886625	-0.2706325	-3.847762	10.96701	0.002724689	0.0308609297353933	-0.4254956	-0.1157693	0.07033503
chr11:43673276	AC068205.2	-	0.4921286	0.5851198	-0.09299117	-4.361928	8.168676	0.002289771	0.0281073993171262	-0.1419763	-0.04400601	0.02131883
chr11:43673276	AC068205.1	-	0.4921286	0.5851198	-0.09299117	-4.361928	8.168676	0.002289771	0.0281073993171262	-0.1419763	-0.04400601	0.02131883
chr11:4398231	OR52K3P	+	0.6039752	0.6900766	-0.08610141	-5.637932	6.643844	0.0009407559	0.0177661764378429	-0.1226097	-0.04959316	0.01527181
chr11:45016620	AC068858.1	-	0.5255899	0.6247731	-0.0991832	-7.230384	9.82233	3.106214e-05	0.00396182233245979	-0.1298229	-0.06854347	0.01371756
chr11:45116598	PRDM11	+	0.5565476	0.6539327	-0.09738507	-4.604837	10.66469	0.0008225503	0.016601935898301	-0.1441116	-0.05065851	0.02114843
chr11:45127368	PRDM11	-	0.5458381	0.4425639	0.1032742	4.05733	6.378588	0.005866863	0.0469938860418984	0.04187634	0.164672	0.02545372
chr11:46066945	PHF21A	-	0.3618013	0.4718929	-0.1100916	-4.223489	9.022885	0.002215313	0.0276206626140038	-0.1690354	-0.05114788	0.02606651
chr11:4758281	MMP26	+	0.5126765	0.6229599	-0.1102834	-5.950516	10.96155	9.723162e-05	0.00628959187439047	-0.1510926	-0.06947415	0.01853342
chr11:4779360	MMP26	-	0.5775789	0.6996312	-0.1220523	-4.081857	10.09524	0.002164868	0.0272828141986355	-0.1885911	-0.05551344	0.02990117
chr11:49160287	FOLH1	-	0.5257473	0.6239872	-0.09823983	-7.026475	8.091102	0.0001038443	0.00648633908387182	-0.1304179	-0.06606179	0.01398138
chr11:49182545	FOLH1	+	0.4912763	0.5988846	-0.1076084	-3.546484	9.129912	0.006110124	0.0480681117189172	-0.1760987	-0.03911797	0.03034227
chr11:49321668	AC118942.1	+	0.5821703	0.7016236	-0.1194533	-5.600297	7.244385	0.0007238003	0.0155773036786934	-0.1695474	-0.06935917	0.02132981
chr11:49583868	AC136759.1	-	0.5788626	0.679411	-0.1005484	-5.166879	10.69922	0.000338893	0.0109164047318086	-0.1435273	-0.05756947	0.01946018
chr11:49590392	AC136759.1	-	0.5434245	0.6241853	-0.08076083	-4.777784	7.556058	0.00163391	0.0235407944528044	-0.1201424	-0.04137925	0.01690341
chr11:49661943	AC136759.1	-	0.5932896	0.7025658	-0.1092762	-6.657743	8.774132	0.0001045484	0.00650525659359845	-0.146552	-0.07200027	0.01641339
chr11:49791167	AC136759.1	+	0.5423207	0.6234174	-0.08109679	-7.110392	7.137775	0.0001750294	0.00806691831444713	-0.1079611	-0.0542325	0.01140539
chr11:50300879	LINC02750	-	0.5640432	0.6641839	-0.1001406	-4.97801	9.357883	0.0006774951	0.0150633562315909	-0.1453836	-0.05489763	0.0201166
chr11:5263482	AC104389.5	+	0.5909276	0.7122349	-0.1213072	-7.047389	10.9416	2.19456e-05	0.00344775742975289	-0.1592177	-0.08339683	0.01721308
chr11:5263482	HBG2	+	0.5909276	0.7122349	-0.1213072	-7.047389	10.9416	2.19456e-05	0.00344775742975289	-0.1592177	-0.08339683	0.01721308
chr11:5402212	HBE1	-	0.6105062	0.6985672	-0.08806102	-6.66151	10.93736	3.655607e-05	0.00422457295356207	-0.117177	-0.05894502	0.01321938
chr11:5402212	AC104389.5	-	0.6105062	0.6985672	-0.08806102	-6.66151	10.93736	3.655607e-05	0.00422457295356207	-0.117177	-0.05894502	0.01321938
chr11:5402212	HBG2	-	0.6105062	0.6985672	-0.08806102	-6.66151	10.93736	3.655607e-05	0.00422457295356207	-0.117177	-0.05894502	0.01321938
chr11:5402212	OR51B5	-	0.6105062	0.6985672	-0.08806102	-6.66151	10.93736	3.655607e-05	0.00422457295356207	-0.117177	-0.05894502	0.01321938
chr11:56811112	OR5G5P	-	0.500489	0.589995	-0.08950596	-7.498745	8.588989	4.759508e-05	0.00468471952514995	-0.1167056	-0.06230632	0.01193613
chr11:5829125	TRIM5	+	0.6216929	0.7457039	-0.1240111	-8.762248	10.6641	3.380753e-06	0.00161953675706382	-0.1552815	-0.09274066	0.01415288
chr11:58753143	AP000445.2	+	0.494578	0.6225662	-0.1279881	-3.9609	10.35218	0.002507839	0.0295073512351391	-0.1996551	-0.05632115	0.0323129
chr11:58796770	TMA16P1	-	0.6190591	0.7172589	-0.09819983	-4.410036	8.379832	0.00201604	0.0262562223916133	-0.1491461	-0.04725354	0.02226735
chr11:58876185	GLYATL2	-	0.4745436	0.5900181	-0.1154746	-5.398041	9.140381	0.0004117258	0.0119296295863478	-0.1637535	-0.06719571	0.02139194
chr11:5895963	OR52E5	+	0.6042789	0.6986903	-0.09441143	-7.930849	10.98898	7.137818e-06	0.00226775965980639	-0.1206159	-0.06820697	0.01190433
chr11:5895963	TRIM5	+	0.6042789	0.6986903	-0.09441143	-7.930849	10.98898	7.137818e-06	0.00226775965980639	-0.1206159	-0.06820697	0.01190433
chr11:59724239	STX3	+	0.6000361	0.696173	-0.09613696	-4.925836	8.31571	0.001031808	0.0186128751714088	-0.1408473	-0.05142664	0.01951688
chr11:6000538	OR56A4	+	0.597017	0.6843259	-0.08730887	-7.473701	10.8108	1.369255e-05	0.00286534475659846	-0.1130761	-0.06154163	0.01168215
chr11:60412863	MS4A14	-	0.1821108	0.40089	-0.2187792	-4.966172	9.781163	0.0006035236	0.0142612798591186	-0.3172359	-0.1203225	0.0440539
chr11:60438620	MS4A5	+	0.5920905	0.6893355	-0.09724503	-6.131511	8.362772	0.0002334539	0.00919116457772136	-0.1335437	-0.06094641	0.01585988
chr11:60538261	MS4A13	+	0.621616	0.7113246	-0.08970851	-5.781945	9.968051	0.0001794657	0.00815856714466564	-0.1242937	-0.05512328	0.01551528
chr11:60672875	LINC00301	-	0.4623401	0.5513189	-0.08897877	-7.375526	10.4054	1.912871e-05	0.00326787238074316	-0.1157179	-0.06223966	0.01206406
chr11:6145027	AC022762.1	+	0.6636627	0.5748693	0.0887934	5.80835	7.006914	0.0006555424	0.0148256037121887	0.05265215	0.1249347	0.0152872
chr11:62978159	SLC22A6	-	0.5954013	0.7065808	-0.1111796	-4.839705	10.84127	0.0005412386	0.0135590194025278	-0.1618319	-0.06052723	0.02297239
chr11:63132178	SLC22A24	-	0.5533423	0.6340209	-0.08067865	-4.921572	8.869518	0.0008588868	0.0169817194967077	-0.1178452	-0.04351209	0.01639286
chr11:63190379	SLC22A10	-	0.5458878	0.6566833	-0.1107955	-7.208682	10.59968	2.119315e-05	0.00340202549596407	-0.1447806	-0.07681042	0.01536973
chr11:63190379	SLC22A25	-	0.5458878	0.6566833	-0.1107955	-7.208682	10.59968	2.119315e-05	0.00340202549596407	-0.1447806	-0.07681042	0.01536973
chr11:63194007	SLC22A25	+	0.5943584	0.7355287	-0.1411703	-5.795371	10.91585	0.0001237624	0.00694353478825821	-0.1948349	-0.08750569	0.02435915
chr11:63194007	SLC22A10	+	0.5943584	0.7355287	-0.1411703	-5.795371	10.91585	0.0001237624	0.00694353478825821	-0.1948349	-0.08750569	0.02435915
chr11:63226091	SLC22A10	-	0.5918254	0.6935013	-0.1016759	-4.954326	9.049191	0.0007739814	0.0161053334258861	-0.148063	-0.05528889	0.02052266
chr11:63226091	SLC22A25	-	0.5918254	0.6935013	-0.1016759	-4.954326	9.049191	0.0007739814	0.0161053334258861	-0.148063	-0.05528889	0.02052266
chr11:63308858	SLC22A10	-	0.466075	0.5567884	-0.09071333	-4.073602	10.6568	0.001963044	0.0259011322539267	-0.1399194	-0.04150725	0.02226858
chr11:63332843	SLC22A10	-	0.4646013	0.5690984	-0.104497	-8.408788	8.186201	2.652635e-05	0.00370988370372572	-0.133041	-0.0759531	0.01242712
chr11:63347372	SLC22A10	-	0.5605167	0.6488941	-0.08837741	-10.07546	10.38463	1.096958e-06	0.00105953556767442	-0.107824	-0.06893085	0.008771554
chr11:63857149	MARK2	-	0.5123027	0.6499515	-0.1376489	-7.821657	10.99793	8.097861e-06	0.00236414321337815	-0.1763836	-0.09891409	0.01759843
chr11:65750893	AP001266.2	-	0.5272676	0.6427408	-0.1154732	-4.158762	9.325962	0.002270044	0.0279785577772344	-0.1779517	-0.05299466	0.02776624
chr11:65760315	AP001266.2	-	0.5700483	0.6515211	-0.08147287	-5.011021	10.84868	0.0004126274	0.0119403049169161	-0.1173191	-0.04562664	0.01625874
chr11:6726372	GVINP1	+	0.6357481	0.7443386	-0.1085905	-9.020479	9.83396	4.559153e-06	0.0018647452908454	-0.1354749	-0.08170617	0.01203822
chr11:67767304	OR7E11P	-	0.5680396	0.6630553	-0.09501566	-4.382026	7.937003	0.0023873	0.028754617216523	-0.145086	-0.04494531	0.02168304
chr11:67870569	ENPP7P7	-	0.479004	0.5690229	-0.09001883	-3.86513	10.83093	0.002705349	0.0307321496790734	-0.1413775	-0.03866012	0.02328999
chr11:68107517	CHKA	-	0.5801665	0.6631396	-0.08297308	-4.804244	10.5785	0.0006135468	0.0143620867880743	-0.1211714	-0.04477472	0.01727079
chr11:6822375	AC087280.2	+	0.5749395	0.6756285	-0.100689	-4.258613	10.94757	0.001360548	0.021393448722814	-0.1527586	-0.04861931	0.0236436
chr11:6886756	AC087280.2	+	0.5696113	0.6514435	-0.08183218	-4.121591	10.93444	0.001717398	0.024171204134671	-0.1255637	-0.0381007	0.01985451
chr11:6900876	AC087280.2	+	0.5509607	0.6470633	-0.09610256	-4.14528	10.08372	0.001959758	0.0258776144076424	-0.1477008	-0.04450434	0.02318361
chr11:6916793	AC087280.2	-	0.6051606	0.6900546	-0.084894	-20.99819	8.120117	2.298392e-08	0.000157458819312621	-0.09419304	-0.07559496	0.00404292
chr11:7041909	NLRP14	-	0.6125024	0.7192989	-0.1067966	-3.923294	9.73521	0.00300163	0.0325189256605714	-0.1676734	-0.04591972	0.02722115
chr11:70564041	SHANK2	-	0.5430208	0.6423104	-0.0992896	-6.150822	8.154721	0.0002531958	0.00954561252353475	-0.1363917	-0.06218752	0.01614249
chr11:71177072	SHANK2	+	0.62578	0.7137671	-0.08798717	-6.108685	10.17893	0.0001061535	0.00653241893546699	-0.1200041	-0.05597022	0.01440362
chr11:71409979	AP002387.1	-	0.5400293	0.6521285	-0.1120991	-6.094443	10.90704	8.084505e-05	0.00582053839983165	-0.1526255	-0.07157281	0.01839366
chr11:71675087	AP003498.1	-	0.560023	0.6525974	-0.09257437	-5.064367	7.596912	0.001137396	0.0195352552443774	-0.1351196	-0.05002914	0.01827955
chr11:71724949	ENPP7P8	+	0.6299391	0.7126434	-0.08270432	-4.095225	10.78877	0.001846017	0.0251013967601834	-0.1272603	-0.03814834	0.02019531
chr11:71724949	AP003498.1	+	0.6299391	0.7126434	-0.08270432	-4.095225	10.78877	0.001846017	0.0251013967601834	-0.1272603	-0.03814834	0.02019531
chr11:7248185	SYT9	-	0.5195445	0.6162449	-0.0967004	-5.557903	7.914748	0.0005565575	0.0137321742547816	-0.1368973	-0.05650354	0.01739872
chr11:7248205	SYT9	-	0.5849301	0.6809327	-0.09600262	-4.071724	9.253913	0.002635089	0.0302988078970996	-0.1491172	-0.042888	0.02357788
chr11:7264556	SYT9	+	0.4291578	0.5633858	-0.134228	-4.542024	7.841999	0.001993092	0.026103334819778	-0.2026158	-0.06584013	0.02955246
chr11:7360923	SYT9	-	0.5753643	0.6706273	-0.09526303	-3.861625	10.74317	0.002762349	0.0310858978153706	-0.1497183	-0.04080779	0.02466916
chr11:73983870	AP003717.4	+	0.5017544	0.6235191	-0.1217647	-4.598679	10.91926	0.0007813609	0.0161910845482175	-0.1800954	-0.06343397	0.02647819
chr11:74172064	PPME1	+	0.3704012	0.2718208	0.09858047	7.530179	10.99378	1.159618e-05	0.00268461791289267	0.06976454	0.1273964	0.01309138
chr11:7503360	AC107884.1	+	0.6319185	0.7123912	-0.08047274	-4.702508	10.64259	0.0007080675	0.0154085554715823	-0.1182925	-0.04265298	0.01711273
chr11:7503360	OLFML1	+	0.6319185	0.7123912	-0.08047274	-4.702508	10.64259	0.0007080675	0.0154085554715823	-0.1182925	-0.04265298	0.01711273
chr11:75216385	AP001972.3	+	0.5183539	0.6032943	-0.08494044	-4.473856	10.95574	0.0009502571	0.0178552692911463	-0.1267489	-0.04313202	0.01898596
chr11:7567156	PPFIBP2	-	0.5776917	0.7033333	-0.1256417	-4.673817	10.52839	0.0007627373	0.0159826023663103	-0.1851336	-0.06614975	0.02688203
chr11:76470587	EMSY	-	0.6099018	0.5157457	0.0941561	4.224847	9.629978	0.00191174	0.0255384244235357	0.04423933	0.1440729	0.02228628
chr11:76956819	ACER3	-	0.6421664	0.5508531	0.09131334	4.090385	9.769797	0.002286162	0.0280897775181961	0.04141328	0.1412134	0.0223239
chr11:76956819	AP002498.1	-	0.6421664	0.5508531	0.09131334	4.090385	9.769797	0.002286162	0.0280897775181961	0.04141328	0.1412134	0.0223239
chr11:7697672	OVCH2	-	0.6027922	0.6835715	-0.08077931	-6.22466	9.935995	0.0001010032	0.00640383733301887	-0.1097198	-0.05183881	0.0129773
chr11:77536659	CLNS1A	+	0.6541757	0.7406032	-0.0864275	-8.820729	10.81817	2.869946e-06	0.00153015090019202	-0.1080376	-0.06481745	0.009798227
chr11:7765483	AC044810.3	+	0.553683	0.6497822	-0.09609926	-7.43977	9.140734	3.618231e-05	0.00420778752969522	-0.125251	-0.06694749	0.01291697
chr11:7765483	AC044810.2	+	0.553683	0.6497822	-0.09609926	-7.43977	9.140734	3.618231e-05	0.00420778752969522	-0.125251	-0.06694749	0.01291697
chr11:7776695	AC044810.2	+	0.455733	0.5403476	-0.08461459	-4.877847	10.95167	0.0004948267	0.0129889072318479	-0.122815	-0.04641418	0.01734671
chr11:7776695	AC044810.3	+	0.455733	0.5403476	-0.08461459	-4.877847	10.95167	0.0004948267	0.0129889072318479	-0.122815	-0.04641418	0.01734671
chr11:78359095	GAB2	+	0.5748673	0.6750452	-0.1001779	-8.261052	7.508753	4.997027e-05	0.00476915652436105	-0.1284634	-0.07189242	0.01212653
chr11:78359095	AP003086.1	+	0.5748673	0.6750452	-0.1001779	-8.261052	7.508753	4.997027e-05	0.00476915652436105	-0.1284634	-0.07189242	0.01212653
chr11:78407356	GAB2	+	0.6286174	0.7127283	-0.08411087	-6.642458	10.68283	4.201715e-05	0.00445980319498345	-0.1120824	-0.05613936	0.01266261
chr11:78407356	AP003086.1	+	0.6286174	0.7127283	-0.08411087	-6.642458	10.68283	4.201715e-05	0.00445980319498345	-0.1120824	-0.05613936	0.01266261
chr11:7872113	AC044810.3	+	0.504553	0.6206159	-0.1160629	-6.755901	10.88749	3.296481e-05	0.00405670102970875	-0.1539224	-0.07820337	0.01717948
chr11:7872113	AC044810.2	+	0.504553	0.6206159	-0.1160629	-6.755901	10.88749	3.296481e-05	0.00405670102970875	-0.1539224	-0.07820337	0.01717948
chr11:7877428	AC044810.3	+	0.5498364	0.636363	-0.08652652	-6.563639	10.84217	4.347887e-05	0.00452243697412294	-0.1155931	-0.05745997	0.01318271
chr11:7877428	AC044810.2	+	0.5498364	0.636363	-0.08652652	-6.563639	10.84217	4.347887e-05	0.00452243697412294	-0.1155931	-0.05745997	0.01318271
chr11:78971957	TENM4	+	0.6675747	0.7546419	-0.08706717	-13.41115	10.98462	3.738098e-08	0.00020290252171	-0.1013587	-0.07277561	0.006492147
chr11:79251803	TENM4	+	0.5375044	0.6221273	-0.0846229	-5.367903	8.015677	0.0006669098	0.0149580400089953	-0.1209638	-0.04828202	0.01576461
chr11:79285021	TENM4	+	0.5738072	0.6705414	-0.09673428	-5.514323	9.451753	0.0003137181	0.0105182897880458	-0.1361306	-0.05733793	0.01754237
chr11:8120525	RIC3	+	0.6627982	0.7970493	-0.134251	-10.1848	10.63961	8.114324e-07	0.000938631172946808	-0.1633837	-0.1051184	0.01318151
chr11:81288028	AP003464.1	+	0.5051178	0.6191213	-0.1140035	-3.617777	10.66867	0.004242941	0.0392570729658961	-0.1836247	-0.04438227	0.03151203
chr11:81831762	MIR4300HG	+	0.5299191	0.6910496	-0.1611305	-3.426127	10.11297	0.00637691	0.0492278587837912	-0.2657613	-0.05649975	0.04702994
chr11:81886636	MIR4300HG	+	0.6034512	0.692074	-0.08862277	-3.798039	7.242658	0.006316911	0.04896619014918	-0.1434259	-0.03381959	0.02333382
chr11:82073103	MIR4300HG	-	0.5508246	0.687496	-0.1366714	-4.532424	7.974193	0.001934068	0.0257027671673666	-0.2062462	-0.0670966	0.03015415
chr11:82231662	MIR4300HG	-	0.4898784	0.6130563	-0.123178	-3.701229	10.23205	0.003944111	0.0377602085686181	-0.1971037	-0.04925219	0.03328028
chr11:82330924	MIR4300HG	+	0.5615987	0.6482892	-0.08669049	-5.924354	10.1404	0.000138236	0.00729138584691284	-0.1192335	-0.05414743	0.0146329
chr11:82347336	MIR4300HG	-	0.5646947	0.691604	-0.1269093	-6.392871	7.97327	0.0002137702	0.00882345469223795	-0.1727141	-0.08110447	0.01985169
chr11:82371676	MIR4300HG	-	0.527305	0.6556426	-0.1283375	-3.752742	10.97878	0.003205244	0.0336928308595519	-0.2036253	-0.05304975	0.03419834
chr11:82385223	MIR4300HG	+	0.5579269	0.6603953	-0.1024683	-7.679733	10.99342	9.646601e-06	0.00252508919756306	-0.1318376	-0.07309913	0.0133427
chr11:82567152	MIR4300HG	+	0.543472	0.6607289	-0.1172569	-6.803193	10.9767	2.972708e-05	0.00388334244200259	-0.155202	-0.07931185	0.01723557
chr11:82800597	LINC02734	-	0.5992596	0.6986581	-0.09939851	-4.717372	7.932533	0.001542398	0.022835652057867	-0.1480597	-0.05073727	0.02107074
chr11:83233903	ANKRD42	-	0.6061021	0.7090591	-0.102957	-4.7344	10.67534	0.0006676078	0.0149665235060203	-0.1509992	-0.05491493	0.02174659
chr11:83308474	AP000446.1	+	0.5432464	0.6680158	-0.1247694	-7.03308	9.562991	4.488401e-05	0.00458185795843818	-0.1645436	-0.0849952	0.01774037
chr11:83339607	AP000446.1	-	0.65536	0.7402904	-0.08493041	-4.608553	10.9232	0.0007682079	0.0160419284752012	-0.1255269	-0.04433392	0.01842887
chr11:83339774	AP000446.1	-	0.6160151	0.7439673	-0.1279522	-6.961285	6.820025	0.0002466637	0.0094384545279269	-0.1716488	-0.08425551	0.01838054
chr11:83470408	DLG2	+	0.6251534	0.7056444	-0.08049097	-4.793371	9.024437	0.0009753056	0.0180791475694922	-0.1184618	-0.04252018	0.01679214
chr11:83882230	DLG2	+	0.5187698	0.606833	-0.08806329	-4.563947	6.715473	0.002882426	0.031808959816092	-0.1340845	-0.04204204	0.01929542
chr11:83885491	DLG2	+	0.595796	0.6760512	-0.08025519	-4.064382	10.42071	0.002086683	0.0267316182443767	-0.1240124	-0.036498	0.01974597
chr11:83938120	DLG2	+	0.5950121	0.7502939	-0.1552818	-3.84821	10.59147	0.002900129	0.0319116848633202	-0.2445151	-0.06604859	0.04035171
chr11:8397929	STK33	+	0.5964986	0.7338333	-0.1373347	-5.192799	8.603255	0.0006580695	0.0148494500939049	-0.1975855	-0.07708386	0.02644714
chr11:84095249	DLG2	+	0.4725054	0.5738945	-0.1013891	-3.459234	10.29164	0.005878446	0.0470448355851064	-0.1664452	-0.03633302	0.0293097
chr11:84166594	DLG2	+	0.5482037	0.654977	-0.1067733	-5.33347	9.470065	0.0003981878	0.0117540657989669	-0.1517201	-0.06182642	0.02001947
chr11:84180088	DLG2	+	0.5205739	0.6095089	-0.08893501	-5.043564	10.1249	0.0004851033	0.0128676741258364	-0.128159	-0.04971103	0.01763336
chr11:84196909	DLG2	+	0.5352194	0.6429609	-0.1077415	-6.33579	8.136564	0.0002084793	0.00872229875818214	-0.1468413	-0.06864166	0.01700522
chr11:84205137	DLG2	+	0.5229049	0.6269189	-0.104014	-4.415082	10.98373	0.001040613	0.0186928607060486	-0.155876	-0.0521521	0.0235588
chr11:84324584	DLG2	-	0.559498	0.6847674	-0.1252693	-5.622769	10.91468	0.000159517	0.00773879534513579	-0.1743517	-0.0761869	0.02227893
chr11:84325564	DLG2	-	0.586468	0.6910763	-0.1046083	-5.253062	5.948811	0.00196527	0.0259103824662295	-0.1534373	-0.05577922	0.01991377
chr11:84353520	DLG2	-	0.4712371	0.5554034	-0.08416628	-4.43341	9.089235	0.001599966	0.0232748410341806	-0.1270481	-0.04128444	0.01898455
chr11:84444921	DLG2	-	0.4597189	0.5922619	-0.1325431	-3.699832	8.864533	0.005052707	0.043253844372187	-0.2137719	-0.0513142	0.03582407
chr11:84502618	DLG2	-	0.4751195	0.6436831	-0.1685636	-8.790298	7.482649	3.330104e-05	0.00408028813342594	-0.2133216	-0.1238056	0.0191761
chr11:84599959	DLG2	+	0.5369692	0.64342	-0.1064508	-9.350626	10.2973	2.362197e-06	0.00144817452658123	-0.1317177	-0.08118377	0.01138434
chr11:84696696	DLG2	+	0.5945293	0.6767	-0.08217069	-5.212089	9.61998	0.0004472813	0.0123892969627282	-0.1174872	-0.04685418	0.0157654
chr11:84797472	AP001825.1	-	0.5629338	0.6681907	-0.1052569	-4.68321	7.52732	0.001855067	0.0251682407718708	-0.1576572	-0.05285657	0.02247537
chr11:84797472	DLG2	-	0.5629338	0.6681907	-0.1052569	-4.68321	7.52732	0.001855067	0.0251682407718708	-0.1576572	-0.05285657	0.02247537
chr11:84985767	DLG2	+	0.6270242	0.7090902	-0.08206595	-6.778631	7.669344	0.000171037	0.00798846263535875	-0.1101947	-0.05393725	0.01210657
chr11:84988149	DLG2	+	0.579076	0.677477	-0.098401	-6.067681	8.917028	0.0001936082	0.0084395436778169	-0.135139	-0.06166297	0.01621723
chr11:85056868	DLG2	+	0.4189627	0.5293762	-0.1104135	-3.436211	10.9974	0.005563587	0.0456670782130934	-0.1811383	-0.03968867	0.03213234
chr11:85060978	DLG2	-	0.5571677	0.6423914	-0.08522369	-6.173601	6.335479	0.0006743124	0.0150261615099476	-0.1185733	-0.05187408	0.01380453
chr11:85173879	DLG2	+	0.5637807	0.6461262	-0.08234554	-4.008043	9.718733	0.002632016	0.0302793193367788	-0.128303	-0.03638805	0.02054507
chr11:85187494	DLG2	+	0.574528	0.6897692	-0.1152413	-11.16967	9.018305	1.390881e-06	0.00116700869730678	-0.1385735	-0.09190904	0.01031734
chr11:85321479	DLG2	+	0.6727936	0.7577598	-0.08496619	-5.154659	10.74436	0.0003406421	0.0109460183401639	-0.1213515	-0.04858093	0.01648338
chr11:85338274	DLG2	+	0.6027958	0.7012583	-0.09846247	-5.380825	9.646141	0.000350451	0.0110855075037431	-0.1394383	-0.05748663	0.01829877
chr11:85419723	DLG2	-	0.5714213	0.6747839	-0.1033626	-7.24245	10.78855	1.846055e-05	0.00322162684543769	-0.1348498	-0.07187535	0.01427177
chr11:85454417	DLG2	-	0.5740188	0.7138312	-0.1398124	-5.920482	10.77746	0.0001087324	0.00658851387381934	-0.19192	-0.08770481	0.02361504
chr11:85495185	DLG2	+	0.513487	0.6218181	-0.1083311	-4.786906	10.15976	0.0007059417	0.0153921815492847	-0.1586482	-0.05801401	0.02263072
chr11:8549826	STK33	-	0.5411899	0.643254	-0.1020641	-6.451885	10.92905	4.873763e-05	0.00473531314009363	-0.1369097	-0.06721853	0.01581927
chr11:86438131	AP001831.1	-	0.6490258	0.7387205	-0.08969473	-5.417592	8.266611	0.0005659812	0.013829664160036	-0.1276601	-0.05172933	0.0165562
chr11:87721096	AP000756.1	-	0.562877	0.6517502	-0.08887317	-5.566896	10.67158	0.0001881726	0.00833372074317454	-0.1241434	-0.05360298	0.01596458
chr11:8781771	DENND2B	+	0.6313086	0.715627	-0.08431843	-8.51325	10.89806	3.833536e-06	0.00172188235223425	-0.1061427	-0.06249414	0.009904375
chr11:8781771	AC026894.3	+	0.6313086	0.715627	-0.08431843	-8.51325	10.89806	3.833536e-06	0.00172188235223425	-0.1061427	-0.06249414	0.009904375
chr11:87874613	AP000676.5	+	0.5540763	0.6567765	-0.1027002	-9.281285	10.64751	1.977088e-06	0.00135442915393514	-0.1271535	-0.0782469	0.0110653
chr11:87934894	AP000676.5	+	0.6404946	0.7496337	-0.1091391	-6.28187	10.151	8.53971e-05	0.00596603356038903	-0.1477721	-0.07050606	0.01737366
chr11:87949202	AP000676.5	-	0.6749631	0.7932622	-0.1182991	-4.266947	7.275807	0.00339994	0.0347845387754998	-0.1833568	-0.05324144	0.02772453
chr11:88072781	AP005436.2	+	0.5593838	0.3406148	0.218769	4.13598	10.99733	0.001656111	0.0237294859474935	0.1023464	0.3351916	0.05289411
chr11:88079365	AP005436.2	+	0.5682727	0.6712995	-0.1030269	-4.52281	10.3798	0.001004463	0.0183459255475605	-0.1535319	-0.05252183	0.0227794
chr11:8847408	DENND2B	+	0.5758527	0.6750276	-0.09917487	-4.001095	8.8368	0.003222234	0.033797122321333	-0.1554051	-0.04294468	0.02478693
chr11:88639139	GRM5	-	0.5084223	0.6087959	-0.1003736	-4.197889	10.90644	0.001518716	0.022645445904452	-0.1530553	-0.0476918	0.02391048
chr11:88672486	GRM5	+	0.6182088	0.7171523	-0.0989435	-4.650373	8.658567	0.001331868	0.0211750597341324	-0.1473651	-0.05052192	0.02127646
chr11:88790755	GRM5	+	0.5133509	0.6209611	-0.1076102	-4.742993	10.88294	0.0006246093	0.0144858282481184	-0.1576123	-0.05760808	0.02268824
chr11:88829862	GRM5	+	0.5331904	0.7270522	-0.1938618	-5.0893	10.99421	0.0003504286	0.0110855075037431	-0.2777072	-0.1100164	0.03809203
chr11:88896371	GRM5	+	0.6145828	0.6999611	-0.08537831	-4.157284	10.82174	0.001653055	0.0237045551934605	-0.130671	-0.04008558	0.02053704
chr11:88939275	GRM5	-	0.5265682	0.6294974	-0.1029292	-7.487038	10.98043	1.232073e-05	0.00275648012477806	-0.1331941	-0.07266421	0.01374765
chr11:8909359	DENND2B	+	0.5143815	0.4175552	0.09682629	3.642194	10.99833	0.00387414	0.0373778928003528	0.03831289	0.1553397	0.0265846
chr11:89229948	TYR	+	0.5986716	0.6814534	-0.08278183	-5.719891	10.39118	0.0001667802	0.00790209806130397	-0.114865	-0.05069861	0.01447262
chr11:89230669	TYR	+	0.5076011	0.6215222	-0.113921	-6.125187	10.98415	7.511545e-05	0.00564473807888711	-0.1548639	-0.07297818	0.01859879
chr11:89290193	TYR	+	0.5830606	0.6767084	-0.09364782	-3.974438	10.99443	0.002181603	0.0273922210876528	-0.1455118	-0.04178383	0.02356254
chr11:89329112	NOX4	+	0.5708874	0.6547473	-0.08385986	-6.405063	9.845641	8.346439e-05	0.0058998898917309	-0.1130944	-0.05462529	0.01309275
chr11:89650603	FOLH1B	-	0.5461532	0.6314645	-0.08531126	-3.74172	10.96726	0.003272978	0.0340778506681864	-0.135512	-0.03511049	0.02280001
chr11:89712940	TRIM77	+	0.5914367	0.6760791	-0.08464234	-4.109579	8.515283	0.002968792	0.0323224640949207	-0.131642	-0.03764272	0.02059635
chr11:90138497	NAALAD2	-	0.5587421	0.6470046	-0.08826245	-4.827168	10.48863	0.000606529	0.0142908875627713	-0.1287471	-0.04777781	0.01828452
chr11:90255154	DISC1FP1	-	0.639976	0.553809	0.08616702	4.591142	9.613495	0.001100731	0.0192256194262376	0.04412006	0.128214	0.0187681
chr11:90551948	DISC1FP1	-	0.5503407	0.6569267	-0.106586	-6.829813	10.90908	2.960395e-05	0.00387834129294598	-0.1409695	-0.07220249	0.01560599
chr11:90573482	DISC1FP1	-	0.5899145	0.6724943	-0.08257982	-5.03882	7.349576	0.001295265	0.0208723577958438	-0.1209624	-0.0441972	0.01638872
chr11:90620424	DISC1FP1	+	0.4589976	0.5440736	-0.08507602	-4.434045	8.682626	0.001787977	0.0246816957569593	-0.1287231	-0.04142896	0.019187
chr11:90624579	DISC1FP1	+	0.6556419	0.7771294	-0.1214875	-5.135668	10.73604	0.0003515534	0.0111052190620915	-0.1737098	-0.06926516	0.02365563
chr11:90807795	DISC1FP1	+	0.5703643	0.6731277	-0.1027634	-8.887947	6.884473	5.110759e-05	0.00481974054334268	-0.1301968	-0.07533011	0.01156211
chr11:90808861	DISC1FP1	+	0.5498239	0.6328267	-0.08300279	-4.928272	8.785532	0.0008752501	0.0171538469146067	-0.1212447	-0.04476091	0.01684217
chr11:90874758	DISC1FP1	+	0.5707229	0.6836036	-0.1128807	-4.584076	9.251477	0.001228938	0.0203072773723158	-0.1683552	-0.05740609	0.02462451
chr11:90884023	DISC1FP1	-	0.6071766	0.7360413	-0.1288647	-4.235934	10.00597	0.001725201	0.0242324950278679	-0.1966432	-0.06108619	0.03042179
chr11:91190713	LINC02748	-	0.5463966	0.6300847	-0.08368812	-4.728185	9.861721	0.0008377772	0.0167521016328601	-0.1232009	-0.04417533	0.01769984
chr11:91194648	LINC02748	+	0.5896249	0.6767333	-0.08710844	-3.966695	10.56095	0.002389433	0.0287665931030335	-0.1356883	-0.03852862	0.02195995
chr11:91204230	LINC02748	-	0.5901331	0.6772446	-0.08711157	-5.197941	8.414463	0.0007018291	0.0153390069063526	-0.1254287	-0.04879441	0.01675886
chr11:92601025	FAT3	+	0.621367	0.7047599	-0.08339299	-4.82578	10.93208	0.0005403611	0.0135508514157964	-0.1214565	-0.04532951	0.01728073
chr11:92619707	FAT3	-	0.5330075	0.63895	-0.1059425	-5.862744	10.99492	0.0001090521	0.00659700398731791	-0.1457176	-0.06616744	0.01807047
chr11:92679113	FAT3	-	0.647148	0.7402116	-0.09306366	-5.058463	10.94281	0.0003731379	0.0114213682636726	-0.1335824	-0.05254495	0.01839762
chr11:92788785	FAT3	+	0.6013151	0.6985012	-0.09718604	-4.74854	9.439528	0.0009171259	0.0175442423344719	-0.143158	-0.05121411	0.02046651
chr11:9289662	TMEM41B	-	0.6152572	0.5345865	0.0806707	4.368439	10.4352	0.001268269	0.0206492669502769	0.03975573	0.1215857	0.01846671
chr11:93361118	DEUP1	+	0.5812802	0.6695568	-0.08827664	-4.870481	10.88754	0.0005092229	0.0131746535543558	-0.1282195	-0.04833382	0.01812483
chr11:94204980	AP002784.1	+	0.5686936	0.6534933	-0.08479962	-5.396772	10.20378	0.000282429	0.0100569544179534	-0.1197159	-0.04988335	0.01571303
chr11:94628019	AP000943.2	+	0.6351558	0.7182579	-0.08310207	-4.270982	8.844923	0.002161486	0.0272594397628324	-0.1272356	-0.03896852	0.01945737
chr11:94787825	AMOTL1	+	0.6040122	0.695298	-0.09128579	-5.524833	8.461184	0.0004578833	0.0125183449203991	-0.129029	-0.05354259	0.01652281
chr11:94982192	KDM4D	-	0.6337657	0.7258309	-0.09206525	-5.777314	10.51904	0.0001467052	0.00746276788657825	-0.127336	-0.05679446	0.01593565
chr11:95621957	AP000820.2	+	0.627915	0.7189355	-0.09102053	-8.645659	8.361965	1.889732e-05	0.00325234399956098	-0.1151162	-0.06692489	0.01052789
chr11:95792102	CEP57	+	0.6682559	0.5859408	0.08231514	4.582385	10.97799	0.0007913335	0.0162948702659186	0.04276832	0.1218619	0.01796338
chr11:95807401	CEP57	+	0.6573752	0.8410978	-0.1837226	-17.45234	9.848473	9.843485e-09	0.000105241023302652	-0.2072275	-0.1602178	0.01052711
chr11:96384666	CCDC82	-	0.696075	0.6104886	0.08558633	5.888415	6.987786	0.0006104838	0.0143399679293323	0.05120505	0.1199676	0.0145347
chr11:96415824	JRKL	+	0.4504517	0.5346121	-0.08416038	-4.797966	10.46964	0.0006378878	0.014628035300689	-0.1230075	-0.04531328	0.01754085
chr11:96417535	JRKL	+	0.5692237	0.6506117	-0.08138804	-4.402212	10.7585	0.001116854	0.0193686566956671	-0.1221915	-0.04058453	0.01848798
chr11:96435857	JRKL	-	0.6761717	0.7664578	-0.0902861	-6.18551	10.37005	8.845918e-05	0.00604502593638388	-0.1226523	-0.05791995	0.01459639
chr11:96441429	JRKL	+	0.5434718	0.6537176	-0.1102458	-4.764655	8.26767	0.001294768	0.0208692345030949	-0.1633035	-0.05718809	0.02313826
chr11:96474407	JRKL	+	0.5565062	0.6477886	-0.0912824	-3.639529	10.15897	0.004424845	0.040184886569647	-0.1470477	-0.03551714	0.02508083
chr11:96474407	JRKL-AS1	+	0.5565062	0.6477886	-0.0912824	-3.639529	10.15897	0.004424845	0.040184886569647	-0.1470477	-0.03551714	0.02508083
chr11:96724142	AP003066.1	-	0.5711119	0.6875409	-0.116429	-7.758543	10.41278	1.212016e-05	0.00273766057712	-0.1496868	-0.08317108	0.01500655
chr11:96759988	AP003066.1	-	0.4778602	0.5805655	-0.1027053	-4.397561	10.61137	0.00116292	0.019746948367779	-0.1543401	-0.05107052	0.02335506
chr11:96790591	AP003066.1	-	0.5582027	0.6575655	-0.09936276	-4.190326	7.880043	0.003139902	0.0333163215538397	-0.1541889	-0.04453659	0.02371242
chr11:96933201	AP003066.1	-	0.6078633	0.7240435	-0.1161802	-7.380004	9.694836	2.807253e-05	0.00379203252158852	-0.1514071	-0.08095334	0.01574256
chr11:96934494	AP003066.1	+	0.5678802	0.6503254	-0.0824452	-4.788386	9.714158	0.0007988034	0.0163636891702665	-0.1209623	-0.04392811	0.01721775
chr11:9706762	SWAP70	-	0.5574001	0.6495246	-0.0921245	-5.674265	10.97448	0.0001448196	0.00742935483703462	-0.1278687	-0.05638028	0.01623549
chr11:97246361	LINC02553	-	0.6084649	0.6960854	-0.08762046	-6.567952	10.57483	4.865577e-05	0.00473476998310811	-0.1171276	-0.05811331	0.01334061
chr11:97944573	LINC02713	-	0.5611311	0.6424334	-0.08130228	-5.058422	6.931125	0.001510013	0.0225763132586127	-0.1193848	-0.04321979	0.01607266
chr11:97946398	LINC02713	+	0.5657989	0.6467893	-0.08099042	-4.390099	10.66845	0.001162177	0.0197456156368277	-0.1217496	-0.04023122	0.01844843
chr11:9904239	SBF2	+	0.5978091	0.7129501	-0.115141	-4.521333	9.942977	0.00112216	0.0194143914970823	-0.1719272	-0.0583547	0.02546615
chr11:9904239	AC011092.2	+	0.5978091	0.7129501	-0.115141	-4.521333	9.942977	0.00112216	0.0194143914970823	-0.1719272	-0.0583547	0.02546615
chr11:99114610	CNTN5	-	0.5113055	0.6486856	-0.1373801	-5.430687	10.99117	0.000207382	0.00870171141131526	-0.1930639	-0.08169632	0.025297
chr11:99190733	CNTN5	-	0.5644077	0.6508283	-0.08642065	-4.657045	8.606041	0.001341305	0.0212430106205813	-0.1286942	-0.04414711	0.01855697
chr11:99340016	CNTN5	+	0.4983437	0.6026044	-0.1042607	-4.479878	6.964928	0.002902646	0.0319248639973191	-0.1593492	-0.04917233	0.02327312
chr11:99403236	CNTN5	-	0.5626301	0.6608553	-0.09822524	-5.494436	10.50533	0.000221362	0.00896274271772435	-0.1378	-0.0586505	0.01787722
chr11:99403621	CNTN5	-	0.5040554	0.5969774	-0.09292201	-5.133743	8.501834	0.000737379	0.0157237087165629	-0.1342363	-0.05160774	0.01810025
chr11:99409457	CNTN5	+	0.5951299	0.6767677	-0.08163781	-5.179789	8.561353	0.0006797247	0.0150925697644967	-0.1175717	-0.04570391	0.01576084
chr11:99457912	CNTN5	-	0.5889484	0.7052652	-0.1163168	-5.107101	7.362242	0.001190342	0.0199668856150902	-0.1696398	-0.06299386	0.02277551
chr11:99592961	CNTN5	+	0.401356	0.5625971	-0.1612412	-7.117192	10.85592	2.091714e-05	0.0033852244488764	-0.2111857	-0.1112966	0.02265517
chr11:99719693	CNTN5	+	0.5298372	0.6306919	-0.1008547	-4.386285	10.89021	0.0011138	0.019342314448847	-0.1515248	-0.05018472	0.0229932
chr11:99800773	CNTN5	-	0.5859931	0.7020537	-0.1160607	-4.771697	9.821454	0.0007940135	0.0163162502132415	-0.1703889	-0.06173244	0.02432273
chr11:99839711	CNTN5	+	0.5544384	0.6463535	-0.09191514	-7.621666	5.745362	0.0003269293	0.0107214182555886	-0.1217441	-0.06208613	0.01205972
chr11:99921514	CNTN5	-	0.5336318	0.6359877	-0.1023559	-3.935482	9.541185	0.003060861	0.0328602890305649	-0.1606863	-0.04402541	0.02600847
chr12:100539149	NR1H4	+	0.5670475	0.6709416	-0.103894	-4.85552	10.976	0.0005094623	0.0131786097524649	-0.1510013	-0.05678677	0.02139709
chr12:100586611	GAS2L3	+	0.5854557	0.6821399	-0.09668425	-5.952712	10.92781	9.815266e-05	0.00632480778364682	-0.1324616	-0.06090691	0.01624205
chr12:100744760	ANO4	-	0.6230103	0.7038512	-0.0808409	-4.722603	8.798896	0.001154338	0.0196744352704041	-0.1196995	-0.04198226	0.01711787
chr12:10077944	CLEC1A	-	0.4934739	0.6084852	-0.1150113	-3.461259	10.82359	0.005446125	0.0451397702379694	-0.1882917	-0.04173091	0.03322817
chr12:10121391	CLEC7A	+	0.3934041	0.3091685	0.08423561	5.296077	9.467251	0.0004195618	0.0120397515552257	0.04852424	0.119947	0.01590528
chr12:101804362	GNPTAB	+	0.6279681	0.7106497	-0.08268162	-4.717431	10.6452	0.0006910866	0.0152172884794852	-0.1214154	-0.04394788	0.01752683
chr12:10186893	TMEM52B	-	0.6097375	0.5284941	0.08124339	3.980309	7.089135	0.005186726	0.0439012358622902	0.03310102	0.1293858	0.02041133
chr12:102243555	HELLPAR	-	0.611487	0.7350644	-0.1235774	-7.169737	10.99998	1.821923e-05	0.00320681625369169	-0.1615135	-0.08564125	0.01723597
chr12:102446823	LINC02456	-	0.6217127	0.7309028	-0.1091901	-7.383911	10.88515	1.472089e-05	0.0029381960262066	-0.1417792	-0.0766009	0.01478756
chr12:102446823	IGF1	-	0.6217127	0.7309028	-0.1091901	-7.383911	10.88515	1.472089e-05	0.0029381960262066	-0.1417792	-0.0766009	0.01478756
chr12:102933710	PAH	-	0.56865	0.6513617	-0.08271163	-4.375975	10.41195	0.001259626	0.0205716224917263	-0.1246016	-0.04082168	0.0189013
chr12:103106038	AC068643.1	+	0.5899238	0.687831	-0.09790724	-4.008198	9.992199	0.00248914	0.0293967146546386	-0.1523392	-0.0434753	0.02442675
chr12:103109934	AC068643.1	+	0.4525166	0.5363981	-0.0838815	-8.210854	10.96983	5.187916e-06	0.00197346366935849	-0.1063742	-0.06138885	0.01021593
chr12:103137315	AC068643.1	+	0.5047619	0.3865152	0.1182468	4.845541	10.74482	0.0005501556	0.0136677728362379	0.06437961	0.1721139	0.02440321
chr12:103482598	C12orf42	-	0.5794411	0.6699859	-0.09054471	-5.383994	10.5789	0.0002540253	0.00956046416158195	-0.1277401	-0.05334933	0.01681739
chr12:10402705	KLRC4-KLRK1	+	0.6023526	0.7027622	-0.1004095	-8.651601	10.91946	3.239704e-06	0.00159890727172257	-0.1259769	-0.07484214	0.01160589
chr12:10402712	KLRC4-KLRK1	+	0.5482535	0.6744841	-0.1262306	-5.305186	10.34983	0.0003073721	0.0104300318241645	-0.1790046	-0.07345656	0.02379381
chr12:104818660	SLC41A2	+	0.6152905	0.7064769	-0.0911864	-4.527206	10.80428	0.000901603	0.0174016334493586	-0.1356165	-0.04675626	0.02014187
chr12:104902577	SLC41A2	+	0.5621468	0.6845133	-0.1223665	-7.383421	9.733987	2.735635e-05	0.00374681638824728	-0.159431	-0.08530199	0.01657315
chr12:105327321	C12orf75	-	0.58002	0.7071895	-0.1271696	-5.260651	10.90841	0.0002756931	0.00993812008268199	-0.1804301	-0.07390898	0.02417373
chr12:10553725	LINC02446	-	0.5656356	0.6538773	-0.08824162	-7.610049	10.27875	1.553512e-05	0.00300909261630524	-0.1139831	-0.0625001	0.01159541
chr12:106260449	CKAP4	+	0.6239987	0.7175379	-0.09353916	-4.882754	9.256743	0.0008000671	0.0163768850438604	-0.1366929	-0.05038543	0.01915705
chr12:107082757	CRY1	+	0.5705327	0.6531292	-0.08259647	-5.326083	10.65064	0.0002705531	0.00986172206338137	-0.1168663	-0.04832667	0.01550792
chr12:107469717	BTBD11	-	0.5758547	0.6975774	-0.1217227	-12.54184	10.60399	1.073129e-07	0.000402785841444149	-0.1431817	-0.1002637	0.009705326
chr12:107860881	AC126177.3	+	0.5443381	0.6462709	-0.1019328	-4.51023	9.005026	0.00146516	0.0222060959701252	-0.153054	-0.05081159	0.02260035
chr12:108167032	WSCD2	-	0.6181717	0.7077409	-0.08956917	-4.137486	7.835218	0.003415381	0.0348656047115287	-0.1396734	-0.03946497	0.02164821
chr12:108167064	WSCD2	-	0.5731617	0.6846202	-0.1114586	-4.744435	10.30806	0.0007236509	0.0155761645615563	-0.1635918	-0.05932533	0.02349249
chr12:10828410	PRH1	+	0.5581539	0.6534669	-0.09531303	-4.137461	10.79611	0.00171742	0.024171204134671	-0.1461333	-0.04449275	0.0230366
chr12:109039199	USP30	-	0.5157143	0.6343064	-0.1185921	-5.606018	9.214712	0.0003044799	0.0103867657256599	-0.1662773	-0.07090689	0.02115442
chr12:109813193	TRPV4	+	0.6090223	0.7207835	-0.1117612	-5.256686	8.048171	0.0007528126	0.0158826751749925	-0.1607376	-0.06278481	0.02126077
chr12:110033140	C12orf76	-	0.6883408	0.5959002	0.09244064	4.095664	7.531929	0.003932535	0.0376967659447509	0.03982486	0.1450564	0.02257037
chr12:110033140	ANKRD13A	-	0.6883408	0.5959002	0.09244064	4.095664	7.531929	0.003932535	0.0376967659447509	0.03982486	0.1450564	0.02257037
chr12:110176050	IFT81	-	0.5969152	0.6822541	-0.08533893	-3.901698	10.71237	0.002594383	0.0300575878929005	-0.1336376	-0.03704025	0.02187225
chr12:110314497	ATP2A2	+	0.3466781	0.4366306	-0.08995251	-4.664246	9.414468	0.001044297	0.0187199665485534	-0.1332884	-0.04661661	0.01928554
chr12:110858020	CCDC63	+	0.5846714	0.6684754	-0.08380398	-7.189993	10.75721	2.003225e-05	0.00334064942136964	-0.1095287	-0.05807927	0.01165564
chr12:111785920	ALDH2	-	0.6075165	0.7547707	-0.1472542	-6.618845	10.50386	4.699587e-05	0.00465827499316077	-0.1965048	-0.09800364	0.02224772
chr12:111785920	AC002996.1	-	0.6075165	0.7547707	-0.1472542	-6.618845	10.50386	4.699587e-05	0.00465827499316077	-0.1965048	-0.09800364	0.02224772
chr12:112571899	RPH3A	+	0.5362872	0.6478965	-0.1116092	-4.083099	9.124578	0.002667234	0.0304920883868511	-0.1733155	-0.04990287	0.02733444
chr12:112579940	RPH3A	-	0.547333	0.6453538	-0.09802078	-4.624598	8.121942	0.00163359	0.0235376834494834	-0.1467703	-0.04927125	0.02119552
chr12:112934809	AC004551.1	+	0.5808586	0.6947479	-0.1138893	-7.069876	10.65201	2.456012e-05	0.00359657869168915	-0.1494871	-0.07829162	0.0161091
chr12:113342122	SLC8B1	+	0.5820384	0.6744793	-0.09244085	-4.616623	10.85202	0.0007712712	0.0160769216947891	-0.1365857	-0.04829604	0.02002348
chr12:11356650	PRB1	-	0.614015	0.6944747	-0.08045971	-3.91513	10.69931	0.002541872	0.029710189473754	-0.1258477	-0.03507175	0.02055097
chr12:11376399	PRB1	-	0.6041028	0.6928665	-0.08876368	-8.399513	9.892483	8.218712e-06	0.00238462616863487	-0.1123448	-0.0651826	0.01056772
chr12:11406342	PRB2	-	0.5292191	0.6297505	-0.1005313	-6.14415	9.870219	0.0001153643	0.0067452676230024	-0.1370535	-0.06400918	0.01636213
chr12:11406342	AC078950.1	-	0.5292191	0.6297505	-0.1005313	-6.14415	9.870219	0.0001153643	0.0067452676230024	-0.1370535	-0.06400918	0.01636213
chr12:11423057	AC078950.1	-	0.6590567	0.7647436	-0.1056869	-7.094584	9.925461	3.448484e-05	0.00413627572214856	-0.1389129	-0.07246082	0.01489684
chr12:11423057	PRB2	-	0.6590567	0.7647436	-0.1056869	-7.094584	9.925461	3.448484e-05	0.00413627572214856	-0.1389129	-0.07246082	0.01489684
chr12:11446920	PRB2	+	0.59441	0.7285615	-0.1341515	-9.111648	8.533655	1.105567e-05	0.00264381566181634	-0.167737	-0.1005661	0.01472308
chr12:11446920	AC078950.1	+	0.59441	0.7285615	-0.1341515	-9.111648	8.533655	1.105567e-05	0.00264381566181634	-0.167737	-0.1005661	0.01472308
chr12:11466708	PRB2	+	0.6152958	0.7134656	-0.09816979	-4.024152	10.89657	0.002039783	0.0264117349666043	-0.1519254	-0.04441418	0.02439515
chr12:11466708	AC078950.1	+	0.6152958	0.7134656	-0.09816979	-4.024152	10.89657	0.002039783	0.0264117349666043	-0.1519254	-0.04441418	0.02439515
chr12:115780217	AC009387.1	-	0.5709675	0.734994	-0.1640264	-6.763629	7.033149	0.0002563026	0.0095957075821529	-0.2213168	-0.1067361	0.02425125
chr12:11578240	LINC01252	+	0.5979095	0.6921917	-0.09428211	-5.553873	9.239885	0.0003227753	0.0106558081651696	-0.1325329	-0.05603135	0.01697592
chr12:115862984	LINC02463	+	0.4083595	0.4898844	-0.08152491	-4.523277	10.20824	0.001046826	0.0187373799556108	-0.1215728	-0.041477	0.01802342
chr12:117157234	FBXO21	+	0.739258	0.604145	0.135113	3.805943	8.718071	0.004430161	0.0402109111835945	0.0544076	0.2158184	0.03550054
chr12:117546904	KSR2	-	0.4900495	0.5864733	-0.09642379	-3.615582	8.464414	0.006210919	0.0484995847571043	-0.1573401	-0.03550748	0.02666895
chr12:11825397	ETV6	+	0.4743617	0.3917084	0.08265329	6.060949	8.737175	0.0002120408	0.00879393886547955	0.05166217	0.1136444	0.01363702
chr12:118802873	LINC02439	-	0.5662093	0.7045982	-0.1383889	-7.736405	9.913608	1.659041e-05	0.00307067782433141	-0.178293	-0.09848479	0.01788801
chr12:118825807	LINC02439	+	0.3536547	0.5270334	-0.1733788	-4.519722	9.435783	0.001284086	0.0207872634061346	-0.2595491	-0.0872084	0.03836049
chr12:119042991	AC084361.1	+	0.5783707	0.6589908	-0.08062011	-5.088254	10.61733	0.0003914612	0.0116576137087483	-0.1156473	-0.04559295	0.01584436
chr12:119042991	SRRM4	+	0.5783707	0.6589908	-0.08062011	-5.088254	10.61733	0.0003914612	0.0116576137087483	-0.1156473	-0.04559295	0.01584436
chr12:119056672	AC084361.1	-	0.6223892	0.7378608	-0.1154715	-5.892946	10.94001	0.0001064925	0.006538867966513	-0.1586284	-0.07231464	0.01959487
chr12:119056672	SRRM4	-	0.6223892	0.7378608	-0.1154715	-5.892946	10.94001	0.0001064925	0.006538867966513	-0.1586284	-0.07231464	0.01959487
chr12:119130062	SRRM4	+	0.5413194	0.6396787	-0.09835934	-4.716277	10.97891	0.0006365591	0.014619072437317	-0.1442723	-0.05244638	0.02085529
chr12:119145247	SRRM4	-	0.4804733	0.5894211	-0.1089478	-5.293806	10.08592	0.0003407548	0.0109468768926068	-0.1547505	-0.06314507	0.02058024
chr12:120327401	PLA2G1B	+	0.6092554	0.6927915	-0.08353608	-5.597979	7.735434	0.0005762278	0.0139394747112959	-0.1181535	-0.04891869	0.01492254
chr12:12112262	BCL2L14	+	0.6035829	0.7517358	-0.1481528	-10.50285	10.78576	5.350912e-07	0.000802861038074153	-0.1792752	-0.1170304	0.01410596
chr12:12193161	BCL2L14	+	0.5466229	0.6311252	-0.08450236	-4.973327	10.98623	0.0004214249	0.0120637792824138	-0.1219053	-0.04709946	0.01699111
chr12:12193161	LRP6	+	0.5466229	0.6311252	-0.08450236	-4.973327	10.98623	0.0004214249	0.0120637792824138	-0.1219053	-0.04709946	0.01699111
chr12:12257740	LRP6	+	0.5752622	0.6683048	-0.0930426	-3.495768	10.67458	0.005233297	0.0441210514773528	-0.1518422	-0.03424303	0.02661578
chr12:12407599	BORCS5	-	0.6056282	0.5157814	0.08984673	6.157682	7.785633	0.0003033733	0.0103691362821749	0.05603788	0.1236556	0.014591
chr12:124295919	RFLNA	-	0.3770254	0.289057	0.08796831	6.330806	9.291051	0.0001183283	0.00681916863720209	0.05668447	0.1192522	0.01389528
chr12:124295977	RFLNA	-	0.4097924	0.3197709	0.09002151	6.8199	9.282467	6.658517e-05	0.00537511348974271	0.06029936	0.1197437	0.01319983
chr12:125000038	BRI3BP	-	0.6012065	0.6906804	-0.08947397	-6.345382	8.882944	0.0001414326	0.00736579346222796	-0.121436	-0.05751191	0.01410064
chr12:125633010	TMEM132B	-	0.5386291	0.6410481	-0.1024189	-5.589695	10.99224	0.0001632208	0.00782518456059886	-0.1427507	-0.06208722	0.01832281
chr12:125870768	AC005252.4	+	0.5516649	0.7375	-0.1858351	-4.26224	10.33696	0.00153795	0.0227962230250389	-0.2825552	-0.08911504	0.04360035
chr12:126137828	LINC02359	+	0.4757179	0.5601828	-0.08446483	-6.383684	9.472453	0.0001018699	0.00642787864495216	-0.1141702	-0.05475944	0.01323136
chr12:126237861	AC007368.1	-	0.6030041	0.6841839	-0.08117975	-8.771221	10.89109	2.889912e-06	0.00153247495915793	-0.1015753	-0.06078423	0.00925524
chr12:126383793	AC007368.1	-	0.5752754	0.6574413	-0.0821659	-4.526674	8.286527	0.001767585	0.0245385477084932	-0.1237727	-0.04055907	0.01815149
chr12:126649983	AC006065.3	+	0.5870767	0.6899775	-0.1029008	-6.196828	9.296401	0.0001390692	0.00731766220087222	-0.1402831	-0.06551856	0.0166054
chr12:126649983	AC006065.4	+	0.5870767	0.6899775	-0.1029008	-6.196828	9.296401	0.0001390692	0.00731766220087222	-0.1402831	-0.06551856	0.0166054
chr12:127018918	LINC02405	-	0.5975654	0.6973285	-0.09976313	-3.354255	10.99909	0.006429674	0.049457054655319	-0.1652261	-0.03430018	0.02974227
chr12:127207602	AC079949.3	-	0.5536601	0.6733095	-0.1196493	-5.991357	9.156896	0.0001909352	0.00838146882805894	-0.1647076	-0.07459102	0.01997032
chr12:127932879	LINC00507	+	0.5605672	0.6444552	-0.08388802	-5.713603	7.027121	0.0007151497	0.0154825073948579	-0.1185787	-0.04919738	0.01468216
chr12:128309543	TMEM132C	-	0.6496837	0.7329068	-0.08322311	-5.710539	10.57975	0.0001578325	0.00771008211405331	-0.1154555	-0.05099069	0.0145736
chr12:128897202	GLT1D1	-	0.5850225	0.6694193	-0.08439677	-4.946679	9.124023	0.0007633111	0.0159892927864607	-0.1229123	-0.04588125	0.0170613
chr12:128908064	GLT1D1	-	0.5987365	0.6848077	-0.08607126	-5.831669	10.28608	0.000148345	0.00750375799820789	-0.1188334	-0.05330908	0.01475928
chr12:128919861	GLT1D1	-	0.4477602	0.5283507	-0.08059058	-6.421908	7.432053	0.0002798043	0.0100202855882308	-0.1099189	-0.0512623	0.01254932
chr12:129119961	TMEM132D	+	0.5544456	0.6663767	-0.1119311	-4.115159	10.99853	0.001715192	0.0241575273192687	-0.1717983	-0.05206399	0.02719971
chr12:129316277	TMEM132D	-	0.596339	0.6783784	-0.0820394	-4.00153	8.204313	0.003743939	0.0367028230730332	-0.129113	-0.03496584	0.02050201
chr12:129629097	TMEM132D	-	0.5282909	0.6198547	-0.09156381	-7.480408	8.407198	5.433644e-05	0.00493513586176206	-0.1195542	-0.06357341	0.01224048
chr12:130712254	RIMBP2	-	0.583624	0.6676222	-0.08399816	-3.602284	8.952948	0.00577722	0.0465980267058729	-0.1367895	-0.03120682	0.02331803
chr12:130712987	RIMBP2	+	0.5984872	0.6962434	-0.09775616	-3.776672	9.975229	0.0036376	0.0361027114325298	-0.1554492	-0.04006314	0.0258842
chr12:130957899	ADGRD1	-	0.5934368	0.6907918	-0.097355	-6.008728	8.26446	0.0002816587	0.0100449278484535	-0.1345104	-0.0601996	0.01620227
chr12:130957899	AC073862.3	-	0.5934368	0.6907918	-0.097355	-6.008728	8.26446	0.0002816587	0.0100449278484535	-0.1345104	-0.0601996	0.01620227
chr12:131079675	ADGRD1	-	0.5982973	0.6897802	-0.09148286	-4.82606	10.12946	0.0006708685	0.0149970238859057	-0.1336464	-0.04931929	0.01895601
chr12:131111828	ADGRD1	-	0.6325803	0.7304443	-0.09786399	-4.997586	6.915905	0.001626348	0.0234804720405115	-0.144283	-0.05144494	0.01958225
chr12:131187500	LINC01257	+	0.5778665	0.70949	-0.1316235	-5.374797	8.961289	0.0004541343	0.0124777275223494	-0.187058	-0.076189	0.02448902
chr12:131212673	LINC01257	+	0.5813508	0.6724088	-0.09105804	-4.990408	9.503668	0.00063547	0.0146056860940492	-0.1320037	-0.0501124	0.01824661
chr12:133178137	AC026786.1	+	0.4722677	0.5715857	-0.09931805	-4.858979	10.71493	0.0005429888	0.0135783299014104	-0.1444529	-0.05418321	0.02044011
chr12:13459319	GRIN2B	+	0.3946342	0.1725907	0.2220435	6.973741	6.126758	0.0003943853	0.0117018832760281	0.1445231	0.299564	0.03183995
chr12:13525756	GRIN2B	+	0.3725407	0.5625154	-0.1899747	-3.472936	9.970987	0.00601741	0.0476591326518357	-0.3119053	-0.06804415	0.05470147
chr12:13575264	GRIN2B	+	0.5637432	0.6477737	-0.08403046	-4.081327	7.782993	0.003739036	0.0366790607245037	-0.1317402	-0.03632071	0.02058901
chr12:13629872	GRIN2B	-	0.5776435	0.6845517	-0.1069082	-3.823983	10.51285	0.003062071	0.0328674242483267	-0.1687915	-0.04502495	0.02795729
chr12:13804029	GRIN2B	-	0.6144402	0.7705506	-0.1561103	-4.322009	9.331938	0.001771342	0.024565575437188	-0.2373782	-0.07484245	0.03611985
chr12:13975222	GRIN2B	+	0.5695803	0.6576974	-0.08811708	-3.545395	10.51965	0.004911015	0.0425733318942112	-0.1431266	-0.03310759	0.02485395
chr12:1418856	ERC1	-	0.7780917	0.6377057	0.1403861	4.590824	10.56281	0.0008623695	0.0170200571177943	0.07273913	0.208033	0.03057971
chr12:14401193	ATF7IP	-	0.5523525	0.633624	-0.08127153	-4.936355	10.4522	0.0005178609	0.0132803015035434	-0.1177413	-0.04480172	0.01646387
chr12:14401948	ATF7IP	-	0.6231307	0.717687	-0.09455625	-5.722221	10.90357	0.0001383174	0.00729295363887021	-0.1309655	-0.05814702	0.0165244
chr12:14453600	ATF7IP	-	0.6172966	0.7171898	-0.0998932	-5.706174	8.418237	0.0003741407	0.0114372816724213	-0.139916	-0.05987038	0.01750616
chr12:15140724	RERG	-	0.5846213	0.6723521	-0.08773082	-5.749713	9.920592	0.0001909718	0.00838146882805894	-0.1217653	-0.05369629	0.0152583
chr12:15203755	RERG	+	0.5630566	0.65	-0.08694336	-6.413655	10.17411	7.11853e-05	0.00551441861516083	-0.117078	-0.05680868	0.01355598
chr12:15260885	RERG	+	0.4673442	0.5610772	-0.09373301	-5.884281	7.797387	0.000406046	0.0118513292356688	-0.1306331	-0.05683296	0.01592939
chr12:15296348	RERG	+	0.5782815	0.6597533	-0.08147185	-4.378933	8.20921	0.002210986	0.0275898193766358	-0.1241864	-0.03875727	0.01860541
chr12:15410200	PTPRO	+	0.4269532	0.60135	-0.1743968	-12.82542	9.881009	1.757327e-07	0.000525437049849576	-0.204744	-0.1440496	0.01359774
chr12:15729159	EPS8	-	0.6419205	0.7235672	-0.08164666	-5.187963	8.996995	0.0005738217	0.0139196296488159	-0.1172496	-0.04604367	0.01573771
chr12:15795861	EPS8	+	0.606573	0.700398	-0.09382496	-6.223882	10.4577	8.09917e-05	0.00582396598690513	-0.1272159	-0.060434	0.01507499
chr12:15877056	EPS8	+	0.6063983	0.6918877	-0.08548943	-4.051144	10.07246	0.002285393	0.028087689642515	-0.132463	-0.03851585	0.02110254
chr12:16252419	SLC15A5	+	0.5886106	0.6722959	-0.08368534	-4.073349	10.99999	0.001840909	0.0250653125367101	-0.1289037	-0.03846697	0.0205446
chr12:16363531	MGST1	+	0.576187	0.6716034	-0.09541636	-5.397484	8.725051	0.000482951	0.0128443814595583	-0.1355995	-0.05523317	0.01767793
chr12:16364633	MGST1	-	0.5316503	0.6460005	-0.1143502	-3.642644	9.810265	0.004661368	0.0413561818600616	-0.1844799	-0.04422046	0.03139207
chr12:16694724	AC007529.1	+	0.6111498	0.7005291	-0.08937931	-4.849672	10.84719	0.0005319327	0.0134524525397642	-0.1300132	-0.0487454	0.01842997
chr12:16694724	AC007529.2	+	0.6111498	0.7005291	-0.08937931	-4.849672	10.84719	0.0005319327	0.0134524525397642	-0.1300132	-0.0487454	0.01842997
chr12:16722398	AC007529.2	+	0.4974923	0.5858368	-0.0883445	-3.903798	10.48609	0.002690742	0.0306464495733193	-0.1384531	-0.03823589	0.0226304
chr12:17088186	AC092110.1	-	0.5452915	0.6348304	-0.08953896	-3.856256	10.78338	0.002768797	0.0311260004011406	-0.1407695	-0.03830843	0.02321915
chr12:17114333	AC092110.1	+	0.6563206	0.8238053	-0.1674847	-30.88109	10.98373	5.009103e-12	1.178199465135e-06	-0.179424	-0.1555454	0.005423535
chr12:17122731	AC092110.1	-	0.5290183	0.6181967	-0.0891784	-4.2594	8.516176	0.002396206	0.0288108944286371	-0.1369542	-0.04140261	0.02093684
chr12:17550458	LINC02378	+	0.6281648	0.7154901	-0.08732529	-4.711735	9.314594	0.001003289	0.0183370242829206	-0.1290363	-0.04561429	0.01853357
chr12:17550458	AC048352.1	+	0.6281648	0.7154901	-0.08732529	-4.711735	9.314594	0.001003289	0.0183370242829206	-0.1290363	-0.04561429	0.01853357
chr12:17600931	AC048352.1	-	0.626827	0.7096131	-0.08278611	-5.402982	10.99183	0.0002162376	0.00887150578186047	-0.1165133	-0.0490589	0.0153223
chr12:17601042	AC048352.1	-	0.4536935	0.5427399	-0.08904639	-4.939094	10.97002	0.0004468244	0.0123858789870365	-0.1287409	-0.04935183	0.01802889
chr12:18190616	RERGL	-	0.5448121	0.6371408	-0.09232868	-5.818988	10.58105	0.0001351523	0.00721327280730545	-0.1274207	-0.05723666	0.01586679
chr12:18212143	RERGL	+	0.6334098	0.7137042	-0.08029445	-7.905524	10.95496	7.499504e-06	0.00230085193741768	-0.1026605	-0.05792837	0.01015675
chr12:18310942	RERGL	+	0.5813722	0.6778175	-0.09644526	-7.911637	7.28593	7.898191e-05	0.00576094417299225	-0.125043	-0.06784752	0.0121903
chr12:18310942	PIK3C2G	+	0.5813722	0.6778175	-0.09644526	-7.911637	7.28593	7.898191e-05	0.00576094417299225	-0.125043	-0.06784752	0.0121903
chr12:18319914	PIK3C2G	-	0.3728115	0.4802859	-0.1074744	-6.423997	8.959114	0.0001242751	0.00695312878120044	-0.145347	-0.06960186	0.01673015
chr12:18319914	RERGL	-	0.3728115	0.4802859	-0.1074744	-6.423997	8.959114	0.0001242751	0.00695312878120044	-0.145347	-0.06960186	0.01673015
chr12:18513766	PIK3C2G	-	0.5358934	0.6522009	-0.1163075	-6.9214	9.767902	4.598111e-05	0.00462115400160831	-0.1538702	-0.07874484	0.01680405
chr12:18516376	PIK3C2G	-	0.6152518	0.7042313	-0.08897948	-7.877245	8.159416	4.372259e-05	0.00453508596128914	-0.1149392	-0.06301973	0.01129576
chr12:18571317	PIK3C2G	-	0.5938926	0.691912	-0.09801942	-3.986294	10.93441	0.002160685	0.0272568091465399	-0.1521793	-0.04385951	0.02458911
chr12:18725338	PLCZ1	+	0.5585077	0.6958362	-0.1373285	-5.5766	10.40346	0.0002036167	0.00863767404740291	-0.1919113	-0.08274579	0.02462585
chr12:18725338	AC087242.1	+	0.5585077	0.6958362	-0.1373285	-5.5766	10.40346	0.0002036167	0.00863767404740291	-0.1919113	-0.08274579	0.02462585
chr12:19703889	AEBP2	+	0.4133296	0.5869444	-0.1736149	-5.038479	10.97374	0.0003816634	0.0115333413240975	-0.2494781	-0.09775161	0.03445779
chr12:19896970	AC024901.1	-	0.5690775	0.7544493	-0.1853718	-6.942423	10.14967	3.694773e-05	0.00424092373736174	-0.2447473	-0.1259963	0.02670131
chr12:19963943	AC024901.1	-	0.6409616	0.7317969	-0.09083527	-3.998422	10.98831	0.002096192	0.0268005008410792	-0.1408433	-0.04082728	0.02271778
chr12:20096394	LINC02398	+	0.5560684	0.6397444	-0.08367607	-4.113129	6.64921	0.005024197	0.0431132396270399	-0.1323005	-0.03505169	0.02034365
chr12:20537493	PDE3A	-	0.4949936	0.5947003	-0.09970677	-4.442599	9.756616	0.001327007	0.0211371472641808	-0.1498833	-0.04953028	0.02244334
chr12:20825960	SLCO1B3	+	0.5732046	0.6584697	-0.08526506	-5.122816	10.76418	0.0003555842	0.0111655905531995	-0.1219968	-0.04853332	0.01664418
chr12:20825960	SLCO1B3-SLCO1B7	+	0.5732046	0.6584697	-0.08526506	-5.122816	10.76418	0.0003555842	0.0111655905531995	-0.1219968	-0.04853332	0.01664418
chr12:20839351	SLCO1B3	-	0.6110348	0.6929025	-0.08186767	-6.216854	8.893229	0.0001637403	0.0078359366965412	-0.1117119	-0.05202347	0.01316867
chr12:20839351	SLCO1B3-SLCO1B7	-	0.6110348	0.6929025	-0.08186767	-6.216854	8.893229	0.0001637403	0.0078359366965412	-0.1117119	-0.05202347	0.01316867
chr12:20842654	SLCO1B3-SLCO1B7	-	0.6033457	0.6963728	-0.09302708	-5.183	9.493992	0.0004861156	0.0128783195577205	-0.1333096	-0.05274452	0.0179485
chr12:20842654	SLCO1B3	-	0.6033457	0.6963728	-0.09302708	-5.183	9.493992	0.0004861156	0.0128783195577205	-0.1333096	-0.05274452	0.0179485
chr12:20911957	SLCO1B3-SLCO1B7	-	0.6000208	0.6810906	-0.08106979	-6.729761	10.98653	3.263726e-05	0.00403797896826788	-0.1075878	-0.05455175	0.01204646
chr12:20911957	SLCO1B3	-	0.6000208	0.6810906	-0.08106979	-6.729761	10.98653	3.263726e-05	0.00403797896826788	-0.1075878	-0.05455175	0.01204646
chr12:20960800	SLCO1B3-SLCO1B7	+	0.4575655	0.5609228	-0.1033574	-3.970216	8.125486	0.003990942	0.037994903246762	-0.1632291	-0.04348574	0.02603319
chr12:20988968	SLCO1B7	-	0.5277677	0.6937415	-0.1659738	-7.412547	10.81945	1.469888e-05	0.00293778971986689	-0.2153564	-0.1165912	0.02239093
chr12:20988968	SLCO1B3-SLCO1B7	-	0.5277677	0.6937415	-0.1659738	-7.412547	10.81945	1.469888e-05	0.00293778971986689	-0.2153564	-0.1165912	0.02239093
chr12:21000014	SLCO1B7	-	0.5430313	0.6272585	-0.08422717	-3.716536	9.56768	0.004313389	0.0396017147118062	-0.1350341	-0.03342027	0.02266282
chr12:21000014	SLCO1B3-SLCO1B7	-	0.5430313	0.6272585	-0.08422717	-3.716536	9.56768	0.004313389	0.0396017147118062	-0.1350341	-0.03342027	0.02266282
chr12:21000521	SLCO1B3-SLCO1B7	-	0.5778573	0.6929286	-0.1150713	-8.161565	6.286402	0.0001428687	0.00739380983570433	-0.1491932	-0.08094928	0.01409917
chr12:21000521	SLCO1B7	-	0.5778573	0.6929286	-0.1150713	-8.161565	6.286402	0.0001428687	0.00739380983570433	-0.1491932	-0.08094928	0.01409917
chr12:21087154	AC022335.1	-	0.5287148	0.6108159	-0.08210104	-6.566048	10.99648	4.052303e-05	0.00439447941330106	-0.109623	-0.05457912	0.01250387
chr12:21087154	SLCO1B7	-	0.5287148	0.6108159	-0.08210104	-6.566048	10.99648	4.052303e-05	0.00439447941330106	-0.109623	-0.05457912	0.01250387
chr12:21087154	SLCO1B3-SLCO1B7	-	0.5287148	0.6108159	-0.08210104	-6.566048	10.99648	4.052303e-05	0.00439447941330106	-0.109623	-0.05457912	0.01250387
chr12:21117464	AC022335.1	-	0.6023174	0.6872519	-0.08493453	-5.041539	10.98369	0.0003787783	0.0115031167440615	-0.1220211	-0.04784793	0.01684695
chr12:21303637	SLCO1A2	+	0.590143	0.6822399	-0.0920969	-6.548796	8.853844	0.000113452	0.00670909133244035	-0.1239903	-0.06020354	0.01406318
chr12:21309461	SLCO1A2	+	0.6196942	0.7014278	-0.0817336	-3.653679	10.97662	0.003809319	0.0370389242760982	-0.1309829	-0.03248428	0.02237022
chr12:21396004	SLCO1A2	+	0.6199025	0.53351	0.08639253	4.118281	8.468406	0.002966739	0.0323089351737788	0.03847941	0.1343056	0.02097781
chr12:21534805	SPX	+	0.5826329	0.699016	-0.1163831	-6.540202	10.65933	4.86167e-05	0.00473381295282147	-0.155703	-0.07706326	0.01779504
chr12:21843318	AC008250.1	-	0.5504361	0.6804881	-0.1300521	-3.503833	10.99956	0.004937166	0.042705596244208	-0.2117466	-0.04835752	0.03711708
chr12:21843318	ABCC9	-	0.5504361	0.6804881	-0.1300521	-3.503833	10.99956	0.004937166	0.042705596244208	-0.2117466	-0.04835752	0.03711708
chr12:2232108	CACNA1C	-	0.601463	0.7123668	-0.1109037	-6.633611	10.96542	3.748552e-05	0.00426444779818665	-0.147715	-0.0740925	0.01671845
chr12:22435699	AC053513.1	+	0.5737096	0.6865566	-0.112847	-3.992145	8.238094	0.003762703	0.0367960825894231	-0.1777049	-0.04798905	0.02826725
chr12:22435699	ST8SIA1	+	0.5737096	0.6865566	-0.112847	-3.992145	8.238094	0.003762703	0.0367960825894231	-0.1777049	-0.04798905	0.02826725
chr12:22789574	AC084816.1	-	0.582648	0.6775397	-0.09489166	-4.534013	10.98713	0.0008547173	0.0169396259404983	-0.1409623	-0.048821	0.02092885
chr12:22842567	AC084816.1	-	0.6352186	0.7305881	-0.09536945	-4.442986	10.36221	0.001144827	0.0196003882116948	-0.1429712	-0.04776772	0.02146517
chr12:22854404	AC084816.1	-	0.5624162	0.6464614	-0.08404522	-6.391897	10.74712	5.712691e-05	0.00504136407426838	-0.1130686	-0.0550218	0.01314871
chr12:22905966	AC084816.1	+	0.5462491	0.6527148	-0.1064657	-4.197251	10.35136	0.001703169	0.0240770165627254	-0.1627248	-0.05020663	0.02536558
chr12:23241493	AC087235.1	-	0.4978845	0.6271848	-0.1293002	-5.728782	9.819537	0.0002042761	0.00864816286726433	-0.1797155	-0.07888494	0.02257028
chr12:23531783	SOX5	+	0.590051	0.6869203	-0.09686933	-5.288586	10.7067	0.0002811994	0.0100391142645184	-0.1373192	-0.05641944	0.01831668
chr12:23652383	SOX5	-	0.6173025	0.7027003	-0.08539787	-6.947105	7.846441	0.000130237	0.00709697779980703	-0.1138415	-0.05695426	0.01229258
chr12:23669925	SOX5	+	0.5764682	0.6632967	-0.08682855	-4.448602	10.45866	0.001109265	0.0192989667595355	-0.1300606	-0.04359651	0.01951816
chr12:23670037	SOX5	+	0.5199796	0.6039032	-0.08392355	-4.694831	10.93106	0.0006668174	0.0149570215826949	-0.1232981	-0.04454902	0.01787574
chr12:23806693	SOX5	+	0.5468753	0.627392	-0.08051673	-4.070335	10.02894	0.002235601	0.0277561064772587	-0.1245751	-0.03645837	0.01978135
chr12:23872099	SOX5	-	0.7291156	0.6348344	0.09428117	5.610181	10.60404	0.0001808435	0.00817954978022048	0.05712359	0.1314387	0.01680537
chr12:23974648	SOX5	+	0.6109098	0.6926321	-0.08172228	-4.417129	8.202952	0.002102816	0.0268535646474591	-0.1242031	-0.03924142	0.01850122
chr12:23994046	SOX5	+	0.5433662	0.6406364	-0.09727017	-4.703141	10.99905	0.0006469963	0.0147271357562821	-0.1427913	-0.05174901	0.02068196
chr12:23994345	SOX5	+	0.585075	0.6814836	-0.09640864	-10.04971	9.210594	2.879733e-06	0.00153015090019202	-0.1180345	-0.07478278	0.009593173
chr12:24002474	SOX5	+	0.7204901	0.6189566	0.1015335	5.348372	7.393827	0.0008914582	0.0173042503014139	0.05712369	0.1459434	0.01898401
chr12:24150497	SOX5	+	0.5934783	0.6764371	-0.08295873	-8.520216	10.94346	3.697964e-06	0.00169363160819273	-0.1044026	-0.0615149	0.009736693
chr12:24411139	SOX5	-	0.6482422	0.7876014	-0.1393591	-7.190292	6.954041	0.0001846645	0.0082605233963233	-0.1852507	-0.09346754	0.01938157
chr12:25178745	CASC1	-	0.6008602	0.7084802	-0.10762	-4.719753	7.608044	0.001722607	0.0242103301039675	-0.1606769	-0.05456313	0.02280204
chr12:25597067	LMNTD1	+	0.5509061	0.6505412	-0.09963505	-5.69203	10.73349	0.000153463	0.00761150376080692	-0.1382788	-0.06099129	0.01750431
chr12:26519853	ITPR2	+	0.6323437	0.7265473	-0.0942036	-12.79469	6.960417	4.328114e-06	0.00182550431702929	-0.1116337	-0.07677346	0.007362711
chr12:27488024	SMCO2	-	0.541804	0.6466148	-0.1048108	-5.343787	10.66568	0.0002622271	0.00970302148445202	-0.1481457	-0.06147593	0.01961358
chr12:28146214	CCDC91	+	0.3870368	0.6012683	-0.2142315	-5.058717	10.9717	0.0003699586	0.0113764647540419	-0.3074704	-0.1209927	0.04234899
chr12:28300057	CCDC91	-	0.5244252	0.642413	-0.1179879	-9.212466	6.84524	4.206545e-05	0.0044622450106359	-0.1484119	-0.08756378	0.01280741
chr12:29491906	OVCH1	+	0.4874316	0.5865423	-0.09911075	-4.783245	9.556387	0.0008426512	0.0168053108648645	-0.1455708	-0.05265067	0.0207204
chr12:3108833	TSPAN9	-	0.5576597	0.6668817	-0.109222	-5.415015	10.99971	0.0002117934	0.00879007386242795	-0.1536165	-0.06482752	0.02017021
chr12:31538817	DENND5B	+	0.6462371	0.7326419	-0.0864048	-6.624977	7.195515	0.0002638133	0.00973860457964116	-0.1170758	-0.05573378	0.01304228
chr12:31576608	DENND5B	+	0.6236659	0.712953	-0.08928711	-6.093128	9.174729	0.000166988	0.00790703114260799	-0.1223402	-0.05623403	0.01465374
chr12:31984949	RESF1	+	0.6294785	0.7432845	-0.113806	-6.225014	9.777101	0.0001082234	0.00658034578504351	-0.1546672	-0.07294485	0.01828205
chr12:32416881	FGD4	-	0.6007833	0.6825014	-0.08171804	-4.403041	8.34732	0.002054845	0.0265168989516468	-0.1242082	-0.03922786	0.01855946
chr12:32604094	FGD4	-	0.5718509	0.6956639	-0.1238129	-4.31987	10.70408	0.001293455	0.0208590163389021	-0.1871094	-0.06051649	0.02866126
chr12:32861591	PKP2	+	0.6366785	0.7604921	-0.1238136	-3.474068	10.98709	0.005211355	0.0440269183586351	-0.2022665	-0.04536063	0.03563937
chr12:3382622	PRMT8	-	0.6140901	0.7036151	-0.08952504	-3.677959	8.149663	0.006039976	0.0477553135092496	-0.1454765	-0.03357361	0.02434096
chr12:3442123	PRMT8	+	0.5041072	0.5974444	-0.0933372	-4.488183	8.236174	0.001890836	0.0254024838332953	-0.141055	-0.04561936	0.02079621
chr12:3528633	PRMT8	-	0.6126819	0.7023963	-0.0897144	-6.447197	10.82105	5.135469e-05	0.00482294761025419	-0.1204036	-0.05902522	0.01391526
chr12:3573309	PRMT8	-	0.5595401	0.6539221	-0.09438202	-5.549774	9.278595	0.0003196923	0.0106089884732449	-0.1326779	-0.0560861	0.01700646
chr12:3838757	PARP11	+	0.5698743	0.4828408	0.08703352	3.499265	10.75846	0.005141914	0.0436977850152953	0.03214041	0.1419266	0.02487195
chr12:3838772	PARP11	+	0.5421208	0.4421687	0.09995205	5.322543	7.918751	0.0007331111	0.0156841054800503	0.05657013	0.143334	0.018779
chr12:38551829	AC087897.2	-	0.5261264	0.633987	-0.1078606	-4.819885	8.627422	0.001067661	0.0189044205995935	-0.1588189	-0.05690225	0.02237825
chr12:38728232	CPNE8	+	0.5695995	0.6831575	-0.113558	-5.362668	9.196511	0.000422641	0.0120775232671202	-0.1613051	-0.06581094	0.02117566
chr12:3879977	AC005842.1	+	0.4285844	0.3334349	0.09514948	5.482022	10.0636	0.0002625183	0.00971008204633609	0.05650958	0.1337894	0.01735664
chr12:3902655	AC005842.1	-	0.6426625	0.7397317	-0.09706918	-5.365336	10.87814	0.0002373088	0.00926641553251065	-0.1369437	-0.05719466	0.01809191
chr12:39314093	KIF21A	+	0.7563712	0.6544743	0.101897	9.527005	10.37238	1.878548e-06	0.00132814563192693	0.07818116	0.1256128	0.01069559
chr12:39559571	ABCD2	+	0.5418529	0.6263959	-0.084543	-4.220487	8.06263	0.002863288	0.031694400350829	-0.1306735	-0.03841249	0.02003158
chr12:39568456	ABCD2	-	0.6267014	0.7388917	-0.1121903	-4.027872	6.862031	0.005220553	0.0440637967628554	-0.1783227	-0.04605785	0.02785348
chr12:39914170	SLC2A13	+	0.7751077	0.4821224	0.2929853	3.941803	10.94868	0.002325468	0.0283389518604932	0.1292975	0.4566732	0.07432774
chr12:40348900	LRRK2	-	0.5176034	0.7223953	-0.2047919	-4.264418	10.72034	0.001412177	0.0218086649171627	-0.3108281	-0.09875569	0.04802341
chr12:40358927	LRRK2	-	0.6437054	0.740421	-0.09671556	-6.234973	10.67987	7.278284e-05	0.00556699283698786	-0.130982	-0.06244908	0.01551178
chr12:40530126	MUC19	-	0.6207102	0.7154304	-0.09472013	-3.827825	8.627976	0.004370442	0.0398956900474774	-0.1510677	-0.03837261	0.02474516
chr12:40840768	CNTN1	+	0.5495302	0.6300947	-0.08056449	-8.147194	7.853234	4.258707e-05	0.00448454451444014	-0.1034421	-0.0576869	0.009888618
chr12:41048838	CNTN1	+	0.6203788	0.7177321	-0.09735329	-4.0757	6.82018	0.004982356	0.0429170860979748	-0.1541386	-0.04056793	0.02388627
chr12:41255085	PDZRN4	+	0.6050738	0.7098035	-0.1047296	-4.687668	10.39115	0.0007731489	0.0160963984140978	-0.1542568	-0.05520246	0.02234152
chr12:42299134	PPHLN1	+	0.6278543	0.7178669	-0.09001252	-6.637126	9.504666	7.37478e-05	0.00560041205908308	-0.1204453	-0.05957974	0.01356197
chr12:43367075	ADAMTS20	+	0.6527256	0.7662912	-0.1135656	-6.507104	10.53775	5.360029e-05	0.00491031545649098	-0.1521851	-0.07494623	0.01745256
chr12:43478188	ADAMTS20	+	0.5225365	0.6084179	-0.08588137	-7.578756	10.92149	1.134769e-05	0.00266432006571334	-0.1108445	-0.06091823	0.01133186
chr12:44026961	TMEM117	-	0.6041155	0.6964087	-0.0922932	-8.550636	10.94944	3.560019e-06	0.00166362517024172	-0.1160634	-0.06852298	0.01079372
chr12:44102613	TMEM117	-	0.5593647	0.6476729	-0.08830825	-4.611882	8.054524	0.00169792	0.0240357850863643	-0.1324116	-0.04420489	0.01914799
chr12:44188868	TMEM117	-	0.5997501	0.6866212	-0.08687105	-4.42989	10.99762	0.00101233	0.0184168788395596	-0.1300339	-0.04370814	0.0196102
chr12:44558094	NELL2	+	0.5398325	0.6220525	-0.08222002	-4.663081	7.797267	0.001731566	0.0242711920694039	-0.1230645	-0.04137552	0.01763212
chr12:44678751	NELL2	+	0.5445346	0.6476397	-0.1031051	-4.337411	10.67746	0.001264053	0.0206142975029467	-0.1556185	-0.05059175	0.02377112
chr12:44684380	NELL2	-	0.585971	0.669781	-0.08381	-3.769631	10.80052	0.003202213	0.0336730086172955	-0.1328549	-0.03476512	0.02223295
chr12:44782805	NELL2	+	0.6272182	0.7421023	-0.1148842	-11.67994	10.74877	1.91523e-07	0.000538959345375486	-0.136595	-0.09317332	0.009836025
chr12:45061392	AC008127.1	+	0.5824315	0.682924	-0.1004925	-3.845033	10.89687	0.002769416	0.0311296810749331	-0.1580832	-0.04290181	0.02613567
chr12:46689880	AC008014.1	+	0.591542	0.683865	-0.09232304	-5.678733	6.680678	0.0008860169	0.0172561225160627	-0.131142	-0.05350408	0.01625768
chr12:46795082	SLC38A4	+	0.5435967	0.6668378	-0.1232411	-7.465307	10.9998	1.253192e-05	0.00277215328531162	-0.1595761	-0.08690601	0.01650851
chr12:46795082	AC008014.1	+	0.5435967	0.6668378	-0.1232411	-7.465307	10.9998	1.253192e-05	0.00277215328531162	-0.1595761	-0.08690601	0.01650851
chr12:4716743	AC005833.1	-	0.6001126	0.6822304	-0.08211782	-6.706038	10.63473	3.95085e-05	0.0043433059959651	-0.109183	-0.0550526	0.01224536
chr12:4716743	GAU1	-	0.6001126	0.6822304	-0.08211782	-6.706038	10.63473	3.95085e-05	0.0043433059959651	-0.109183	-0.0550526	0.01224536
chr12:48043902	SENP1	+	0.6937696	0.5549553	0.1388143	3.663519	10.78966	0.003850675	0.0372608237953046	0.05521806	0.2224106	0.03789097
chr12:48204681	AC024257.3	-	0.59851	0.6834605	-0.0849505	-6.573519	6.159069	0.0005339149	0.0134736084851405	-0.1163754	-0.05352563	0.01292314
chr12:48406132	AC090115.1	-	0.4439274	0.5320271	-0.08809974	-5.729307	10.84142	0.0001399232	0.00733487164638586	-0.1220049	-0.05419463	0.01537703
chr12:48700313	CCNT1	+	0.6307351	0.7119798	-0.08124475	-5.125548	10.99609	0.0003309691	0.0107902134946636	-0.1161339	-0.04635556	0.01585094
chr12:48742135	TEX49	-	0.5983891	0.7350168	-0.1366277	-7.112284	10.99021	1.971154e-05	0.0033156972838379	-0.1789135	-0.09434198	0.01921011
chr12:488076	B4GALNT3	+	0.583086	0.7055601	-0.1224741	-6.358364	9.928228	8.531988e-05	0.00596440395520111	-0.1654343	-0.07951384	0.01926189
chr12:489588	B4GALNT3	+	0.6204769	0.7295964	-0.1091195	-4.96993	6.467289	0.002037715	0.0264006136902358	-0.1619167	-0.05632232	0.02195594
chr12:49249585	TUBA1C	+	0.6198191	0.7056171	-0.08579798	-3.675703	8.346256	0.005815235	0.0467644480210031	-0.1392383	-0.03235764	0.02334193
chr12:49249585	AC010173.1	+	0.6198191	0.7056171	-0.08579798	-3.675703	8.346256	0.005815235	0.0467644480210031	-0.1392383	-0.03235764	0.02334193
chr12:50012713	RACGAP1	+	0.6981882	0.7963312	-0.09814307	-6.573838	10.50899	4.972784e-05	0.00476283155176223	-0.1311906	-0.06509552	0.01492934
chr12:50279723	LIMA1	+	0.6420898	0.7326359	-0.09054611	-4.283689	10.05697	0.001581454	0.0231242341847984	-0.1376071	-0.04348515	0.02113742
chr12:511679	B4GALNT3	-	0.611499	0.7532084	-0.1417094	-7.568058	10.88131	1.174686e-05	0.00269570698508943	-0.1829771	-0.1004418	0.01872468
chr12:512158	B4GALNT3	-	0.5769596	0.6688779	-0.09191836	-3.974671	10.69521	0.00230055	0.0281766307806995	-0.1429959	-0.04084077	0.02312603
chr12:512634	B4GALNT3	-	0.7174831	0.6348194	0.08266374	6.517289	10.95829	4.402218e-05	0.00454478287992685	0.054734	0.1105935	0.01268376
chr12:51646305	SCN8A	+	0.5653004	0.6491658	-0.08386544	-5.271445	7.226757	0.001046615	0.0187367611001877	-0.1212472	-0.0464837	0.01590939
chr12:51742881	SCN8A	-	0.59932	0.7037829	-0.1044629	-7.554974	9.772219	2.206014e-05	0.00345042537445158	-0.1353691	-0.07355674	0.01382704
chr12:52299087	AC021066.1	-	0.5217328	0.6148227	-0.09308987	-4.35485	10.46949	0.001286383	0.0208048789412102	-0.140431	-0.04574879	0.02137614
chr12:52299087	AC121757.2	-	0.5217328	0.6148227	-0.09308987	-4.35485	10.46949	0.001286383	0.0208048789412102	-0.140431	-0.04574879	0.02137614
chr12:5306053	AC006206.2	+	0.5954715	0.6828538	-0.08738232	-4.662456	10.89166	0.0007093992	0.0154184757527181	-0.1286826	-0.04608201	0.01874169
chr12:5319712	AC006206.2	+	0.5494878	0.6522018	-0.1027141	-7.849008	10.22109	1.220644e-05	0.00274572985831214	-0.1317868	-0.07364134	0.01308625
chr12:53222396	RARG	+	0.4083107	0.5283731	-0.1200624	-4.779289	9.168079	0.0009517559	0.0178691005347089	-0.1767326	-0.0633923	0.0251214
chr12:5352109	AC006206.2	+	0.5789917	0.6610378	-0.08204608	-6.08314	9.395891	0.0001532437	0.00760757832063459	-0.112362	-0.05173018	0.01348745
chr12:53804990	AC076968.2	-	0.4956142	0.5927482	-0.09713404	-3.43821	10.83159	0.005664228	0.0461231737919614	-0.159433	-0.03483511	0.02825134
chr12:53889493	AC076968.2	-	0.6272965	0.7114098	-0.08411327	-5.128104	9.21195	0.0005772545	0.0139472384258714	-0.1210884	-0.04713817	0.01640241
chr12:5475768	NTF3	+	0.6052819	0.6960012	-0.0907193	-5.715726	9.409399	0.0002441981	0.00938891332716722	-0.1263873	-0.05505135	0.01587188
chr12:55460639	AC122685.1	+	0.6327085	0.7154249	-0.08271635	-3.816193	7.766892	0.005408082	0.0449652931203973	-0.1329615	-0.03247116	0.0216751
chr12:55575710	AC122685.1	+	0.5388854	0.6524068	-0.1135215	-4.877834	10.86215	0.0005067437	0.0131383289516111	-0.1648243	-0.06221868	0.02327292
chr12:56779200	HSD17B6	-	0.6022186	0.7204682	-0.1182496	-4.912903	8.111991	0.001127919	0.0194586847480563	-0.1736202	-0.06287906	0.0240692
chr12:56781094	HSD17B6	-	0.6340407	0.7312738	-0.0972331	-5.532441	9.07999	0.000353292	0.0111313519694711	-0.1369374	-0.05752883	0.01757508
chr12:56829917	AC121758.2	-	0.6123854	0.6970785	-0.08469314	-6.337099	10.07455	8.216198e-05	0.00585837531722884	-0.1144416	-0.05494467	0.01336465
chr12:56989875	AC026120.3	+	0.5183242	0.6152491	-0.0969249	-5.02911	6.355206	0.002014765	0.0262493067110098	-0.1434521	-0.05039773	0.01927277
chr12:57879084	AC083805.1	+	0.3959197	0.3147752	0.08114443	3.931555	10.99754	0.002346791	0.0284815587455928	0.03571647	0.1265724	0.02063927
chr12:58754622	AC020637.1	+	0.5803675	0.6803922	-0.1000246	-6.68345	9.281808	7.805524e-05	0.00574093279939546	-0.1337241	-0.06632518	0.01496602
chr12:58754622	LINC02388	+	0.5803675	0.6803922	-0.1000246	-6.68345	9.281808	7.805524e-05	0.00574093279939546	-0.1337241	-0.06632518	0.01496602
[truncated: 8,329 more rows]
