# Supplementary material for: DNA Methylation Signature in Mononuclear Cells and Proinflammatory Cytokines May Define Molecular Subtypes in Sporadic Meniere Disease
Source: Preprints.org preprint supplement (doi:10.20944/preprints202110.0030.v1), 2021-10-01
Supplement: Supplementary file 11 [file Table_S4.xls]

## Sheet: Folha1
Position	Gene	Strand	mean MDL	mean Control	∆Mean	t-test	DF	p-value	padjust	CI_1	CI_2	SE
chr1:106042448	AL355306.2	-	0.615974352158563	0.70770206633378	-0.0917277141752172	-5.17057760981161	9.28007187401955	0.000532015712877219	0.0389292931459898	-0.131675244073845	-0.0517801842765892	0.0177403224740609
chr1:107204267	NTNG1	-	0.622456782449475	0.723724215934361	-0.101267433484886	-8.53497763232704	10.8259803913352	3.91311283710026e-06	0.00852231289138038	-0.127433409235676	-0.075101457734095	0.0118649910810927
chr1:107735408	VAV3	+	0.6525310290454	0.748999111434927	-0.096468082389527	-6.52596651709467	10.5563516467939	5.18518911565536e-05	0.0182037044501777	-0.129171071069822	-0.0637650937092324	0.0147821908274936
chr1:110621427	KCNA2	+	0.546248854738233	0.633704591939619	-0.087455737201386	-9.38156760640545	10.3738739395006	2.16780783482816e-06	0.00756426701177495	-0.108125605586931	-0.066785868815841	0.00932208143356275
chr1:111303403	CHIA	-	0.627923976608187	0.709214743589744	-0.0812907669815565	-7.47086987251367	10.3763659729491	1.73373082961863e-05	0.0136607662285709	-0.105416543097934	-0.0571649908651784	0.0108810310403928
chr1:111866350	KCND3	-	0.63527956448408	0.732391947301203	-0.0971123828171233	-7.070441261406	9.23927562302697	5.12491663815131e-05	0.0181302607910536	-0.128060843531943	-0.0661639221023034	0.0137349819094335
chr1:114884284	SYCP1	-	0.608403930378657	0.701718338446027	-0.0933144080673699	-7.74186039751996	9.61921692541309	1.96430287892512e-05	0.0138497566711553	-0.12031547821629	-0.0663133379184494	0.0120532279421187
chr1:120305596	AC244669.2	+	0.641151434043345	0.73597959064711	-0.0948281566037644	-8.64012740116967	7.79497912630842	2.92917811204527e-05	0.015436374884937	-0.120253626898215	-0.0694026863093144	0.0109753192517655
chr1:120305596	AC244669.1	+	0.641151434043345	0.73597959064711	-0.0948281566037644	-8.64012740116967	7.79497912630842	2.92917811204527e-05	0.015436374884937	-0.120253626898215	-0.0694026863093144	0.0109753192517655
chr1:147332815	LINC00624	+	0.651250408630271	0.733604497354497	-0.082354088724226	-7.58861623464834	9.68740091268519	2.2318712273711e-05	0.0141893359179215	-0.106640746666999	-0.0580674307814529	0.0108523196031723
chr1:147467675	LINC00624	-	0.607929212085687	0.694785670908378	-0.0868564588226916	-8.14296332326585	10.6158597772822	6.92227260157639e-06	0.0100298144816998	-0.1104372062646	-0.0632757113807834	0.0106664435752188
chr1:148490502	LINC01138	+	0.647718034582254	0.735227563712218	-0.0875095291299645	-4.90584367507173	10.9741541706211	0.000470484509712159	0.0369375820431977	-0.126781578262432	-0.0482374799974968	0.0178378144364099
chr1:148851878	PDE4DIP	+	0.577321655935101	0.675594007247233	-0.0982723513121317	-5.00789818663282	10.9533873124873	0.000402713031765394	0.0347290885962002	-0.141485758106627	-0.0550589445176364	0.0196234722931153
chr1:148869171	PDE4DIP	-	0.6334147626662	0.734552212493389	-0.101137449827189	-5.4882976059012	10.6163032967268	0.000215144249291858	0.0281657351296958	-0.141876412838944	-0.0603984868154339	0.0184278362963485
chr1:148875902	PDE4DIP	-	0.473544973544974	0.587963664687803	-0.114418691142829	-8.26217752761548	9.4801437005169	1.240206578292e-05	0.012308483387807	-0.145505952077104	-0.083331430208554	0.0138484910013609
chr1:148956181	PDE4DIP	+	0.443611889200125	0.342720049241788	0.100891839958336	7.41213901637359	7.34191086421677	0.000116630613454899	0.0233345568412182	0.0690066551432442	0.132777024773428	0.0136117036843837
chr1:152384283	FLG-AS1	-	0.644702347342099	0.733818516427212	-0.0891161690851132	-8.37105385641156	10.3196441357913	6.44283390031436e-06	0.00977696580483511	-0.112737170494438	-0.0654951676757882	0.0106457526870237
chr1:153601786	BX470102.2	+	0.630586080586081	0.713719504895975	-0.0831334243098949	-5.70947875259548	8.05819232829645	0.00043767054961299	0.0358028817848553	-0.116668063985951	-0.0495987846338384	0.014560597895579
chr1:157295541	AL138900.2	+	0.660956817509613	0.752305718972386	-0.0913489014627731	-5.19769690445691	10.9651228804483	0.000298596111488351	0.0314331677552479	-0.130045969019931	-0.0526518339056152	0.0175748804022111
chr1:159419924	AL513323.1	-	0.593404715051543	0.692357471474347	-0.0989527564228038	-4.96774852350468	8.37439434950871	0.000957127558698343	0.0483071815236468	-0.14453112921593	-0.053374383629678	0.0199190349420091
chr1:163125070	RGS5	+	0.632334933973589	0.74024559318677	-0.10791065921318	-8.15208833823798	9.74487233583022	1.17181177404946e-05	0.0121064626820116	-0.137509937661364	-0.0783113807649966	0.0132371798164916
chr1:167097954	DUSP27	+	0.620587182241318	0.725121302082086	-0.104534119840769	-4.94450449761001	10.9927898570435	0.000440296792616599	0.0358763079974612	-0.151069917230216	-0.057998322451322	0.0211414753270619
chr1:167097954	GPA33	+	0.620587182241318	0.725121302082086	-0.104534119840769	-4.94450449761001	10.9927898570435	0.000440296792616599	0.0358763079974612	-0.151069917230216	-0.057998322451322	0.0211414753270619
chr1:172300388	DNM3	-	0.640805189699484	0.721285273368607	-0.0804800836691224	-6.62792692656384	8.67915236768866	0.000113646575658948	0.0231170756607185	-0.108104062634013	-0.0528561047042317	0.0121425725661774
chr1:172428194	PIGC	-	0.490303813833226	0.40647848883143	0.0838253250017956	5.70939624816782	9.38946283314596	0.000248198535921229	0.0294753547789862	0.0508211643322868	0.116829485671304	0.0146819946204812
chr1:172428194	C1orf105	-	0.490303813833226	0.40647848883143	0.0838253250017956	5.70939624816782	9.38946283314596	0.000248198535921229	0.0294753547789862	0.0508211643322868	0.116829485671304	0.0146819946204812
chr1:172786024	AL031599.1	-	0.603355508870215	0.694948352557048	-0.0915928436868335	-6.30405916928077	8.93611378754623	0.000144683857629166	0.0248835906030502	-0.124495997736453	-0.058689689637214	0.0145291852800429
chr1:173838521	DARS2	-	0.605063173541434	0.697301587301587	-0.0922384137601528	-4.57058400583196	10.3257638577487	0.000944113976940501	0.0480501075282237	-0.137012668902606	-0.0474641586176995	0.0201808814021269
chr1:178414839	RASAL2	-	0.641782527376495	0.728623721178653	-0.0868411938021583	-4.58013675458483	10.7080777279395	0.000846811146253083	0.0462650988381231	-0.128711962578742	-0.0449704250255747	0.0189603932055584
chr1:179570757	NPHS2	-	0.647075063082793	0.742335562987737	-0.0952604999049435	-6.22137962729111	10.2824115305148	8.745766718308e-05	0.0210841103459968	-0.129250720798436	-0.0612702790114509	0.0153117966772302
chr1:179655371	TDRD5	-	0.601725009779508	0.7017982877116	-0.100073277932093	-8.06631728024105	7.65962454865706	5.26193440074776e-05	0.0182726627995652	-0.128905100845814	-0.0712414550183713	0.0124063156029367
chr1:179677032	TDRD5	-	0.622711811997526	0.727493386243386	-0.10478157424586	-5.09140763453305	10.66722006669	0.000383906066624591	0.0342434688539994	-0.150251027920229	-0.0593121205714912	0.020580079570759
chr1:182506327	RGSL1	-	0.667188121164981	0.763054432636346	-0.0958663114713644	-7.52339807055001	7.86037567688696	7.43167544123486e-05	0.0202789696026141	-0.125341489810738	-0.0663911331319912	0.0127424217849948
chr1:186073170	HMCN1	+	0.619892607392607	0.809576534576535	-0.189683927183927	-6.59951315785398	7.8750821374759	0.000181792105457555	0.0267247650696962	-0.256146798293482	-0.123221056074372	0.0287421090990912
chr1:186126625	HMCN1	+	0.633833076121698	0.732059860870836	-0.098226784749138	-8.93113922962087	7.73187233786583	2.4325901663634e-05	0.0145288435894105	-0.123742673447767	-0.0727108960505092	0.0109982368680762
chr1:187493685	ERVMER61-1	-	0.629964171903579	0.712931191615402	-0.082967019711823	-4.55443463578333	10.4830981065855	0.000931673706335478	0.0478269239535547	-0.123304357845454	-0.0426296815781917	0.0182167549535055
chr1:190223737	BRINP3	+	0.591222509045214	0.733177914371628	-0.141955405326414	-7.93376949611738	9.52570594219828	1.69367963831391e-05	0.0135948936669268	-0.182093213751342	-0.101817596901487	0.0178925547806606
chr1:190232593	BRINP3	+	0.655442841104053	0.826001827549815	-0.170558986445762	-6.33538833148317	8.2904658961166	0.000192571446449775	0.0272448235278556	-0.232263804683852	-0.108854168207672	0.0269216309280023
chr1:1933776	CFAP74	-	0.640255525287038	0.724872328764317	-0.0846168034772787	-6.6319341043837	8.7317559037921	0.000110042486613605	0.0229034137613362	-0.113615380734682	-0.0556182262198752	0.0127589934015399
chr1:193977155	AL136456.1	-	0.611188064969578	0.698241518829754	-0.0870534538601766	-5.13368673570764	9.32915767289718	0.000550430223585987	0.0395280715265722	-0.125208200728956	-0.0488987069913972	0.0169572976190135
chr1:194884801	AL353072.2	+	0.618719966285826	0.712675784607644	-0.0939558183218178	-28.6439986918899	9.83229317457344	8.42088586446777e-11	1.7222444525549e-05	-0.101281319025763	-0.0866303176178723	0.00328012228084691
chr1:196989206	CFHR5	-	0.628976056825892	0.714512588661195	-0.0855365318353031	-5.49503333668043	7.42338794520088	0.000746423058527488	0.0441604959255508	-0.121923309832698	-0.0491497538379084	0.0155661533960731
chr1:204959305	NFASC	-	0.473557402349972	0.564909969257795	-0.0913525669078233	-7.74388823263361	10.0134931514406	1.55168936560536e-05	0.0131760087304325	-0.117632521578492	-0.065072612237155	0.0117967310688774
chr1:207276431	AL596218.1	-	0.618185615554037	0.708011921458626	-0.089826305904589	-4.82149047661193	10.0532215824629	0.000690174923804355	0.0429009498201802	-0.131307659718888	-0.0483449520902898	0.0186304020178652
chr1:208730416	LINC01717	+	0.584059423227286	0.667913956309898	-0.0838545330826127	-7.16799841231583	7.4500968465218	0.000135286858007554	0.0244131326908152	-0.111181783136078	-0.0565272830291476	0.0116984586573759
chr1:210985120	KCNH1	-	0.668477390956383	0.889138955443303	-0.220661564486921	-5.37448340140211	6.98272940857144	0.00104491973838859	0.0499799601741474	-0.317795256620555	-0.123527872353286	0.0410572603925716
chr1:210985120	AL590132.1	-	0.668477390956383	0.889138955443303	-0.220661564486921	-5.37448340140211	6.98272940857144	0.00104491973838859	0.0499799601741474	-0.317795256620555	-0.123527872353286	0.0410572603925716
chr1:211005352	AL590132.1	+	0.502893949850472	0.607497149057251	-0.10460319920678	-6.05643701963124	6.01719658770168	0.000908567705626783	0.0474023787770762	-0.146835553841714	-0.0623708445718452	0.0172714087288815
chr1:211005352	KCNH1	+	0.502893949850472	0.607497149057251	-0.10460319920678	-6.05643701963124	6.01719658770168	0.000908567705626783	0.0474023787770762	-0.146835553841714	-0.0623708445718452	0.0172714087288815
chr1:211388160	LINC00467	+	0.66765873015873	0.831757054673721	-0.164098324514991	-8.35977956458793	10.4020314031146	6.19346174171648e-06	0.00976215324778098	-0.207607530419587	-0.120589118610396	0.0196295037742517
chr1:213503241	AL592402.1	-	0.522489557226399	0.603402603731551	-0.0809130465051517	-5.28725604225744	9.89063777059431	0.000367156427902685	0.0336351897952228	-0.115062343416475	-0.0467637495938283	0.0153034099083662
chr1:214144023	LINC02775	+	0.658154296103626	0.762375782112624	-0.104221486008998	-6.3576721263427	10.7531328725264	5.96980962245543e-05	0.0188901641835934	-0.140403612988348	-0.0680393590296493	0.0163930262426025
chr1:215677582	USH2A	-	0.647086163627517	0.767100709274622	-0.120014545647105	-7.48545306316613	10.0755173251958	2.01099948473547e-05	0.0139617789167048	-0.155702117699252	-0.0843269735949584	0.016033036963075
chr1:217766771	SPATA17	-	0.587035979893123	0.668506776470065	-0.0814707965769418	-4.63610609548035	10.5887073829668	0.000797392199971779	0.0452123619949447	-0.120333037497478	-0.0426085556564055	0.0175731087466627
chr1:219098700	LYPLAL1-DT	+	0.652340282848747	0.805155669873778	-0.152815387025031	-5.69240898635089	9.1593247081207	0.000278383856247358	0.0306104200310035	-0.213383409695287	-0.0922473643547748	0.0268454686568459
chr1:225216794	DNAH14	-	0.656547619047619	0.753650793650794	-0.0971031746031746	-9.20512603375637	10.8617364891528	1.84620902784121e-06	0.00711885085989471	-0.120357070340169	-0.0738492788661808	0.0105488153282296
chr1:230751334	CAPN9	+	0.551145887585279	0.631255767330664	-0.0801098797453846	-5.79629510308381	9.89798195684665	0.000180870415275469	0.0266781972163264	-0.110947789499124	-0.0492719699916455	0.0138208766670219
chr1:230751334	AL512328.1	+	0.551145887585279	0.631255767330664	-0.0801098797453846	-5.79629510308381	9.89798195684665	0.000180870415275469	0.0266781972163264	-0.110947789499124	-0.0492719699916455	0.0138208766670219
chr1:233926238	SLC35F3	-	0.645399556583767	0.737075170242139	-0.0916756136583723	-4.91692493444566	9.0613427158599	0.000811765575325691	0.0455478849988028	-0.133809841137148	-0.0495413861795966	0.0186449081246159
chr1:235817267	LYST	+	0.542234179574333	0.627060381139328	-0.0848262015649954	-6.52075345795536	6.84243937207915	0.000360774691560184	0.0334057935920509	-0.11573094549007	-0.0539214576399212	0.0130086503211538
chr1:235837998	LYST	+	0.589166575721198	0.687391821023535	-0.098225245302337	-6.63875820774502	9.87676148848328	6.14086372348957e-05	0.0191409735845035	-0.131248019425408	-0.0652024711792663	0.0147957256807069
chr1:237923303	AL359924.1	-	0.608872943810351	0.705758377425044	-0.0968854336146928	-4.62740139141534	9.93993540272028	0.000954945075034318	0.0482626176781149	-0.143574953471453	-0.0501959137579325	0.0209373307866555
chr1:239455704	CHRM3	+	0.64957264957265	0.767180236917079	-0.117607587344429	-5.44978474729229	8.33144736661725	0.00052977582541729	0.0388688096955247	-0.167029173042926	-0.0681860016459327	0.0215802261553289
chr1:239482172	CHRM3	-	0.616110001312778	0.7072977582846	-0.0911877569718224	-6.2994166093688	9.60941041620354	0.000106164463803074	0.0226461189285617	-0.123619966421983	-0.0587555475216617	0.0144755876022239
chr1:239634326	CHRM3	+	0.625052587762133	0.705884350665688	-0.0808317629035553	-6.83326721230479	7.58718666864266	0.000170343861033458	0.0261869918318319	-0.108370352439579	-0.053293173367532	0.0118291529355094
chr1:242150638	PLD5	-	0.625896342283734	0.756128694639817	-0.130232352356083	-5.45939201529232	7.81216942692115	0.000652920375786356	0.0419946649683716	-0.185472540313372	-0.0749921643987931	0.0238547354707792
chr1:242150638	AL591686.2	-	0.625896342283734	0.756128694639817	-0.130232352356083	-5.45939201529232	7.81216942692115	0.000652920375786356	0.0419946649683716	-0.185472540313372	-0.0749921643987931	0.0238547354707792
chr1:244361120	C1orf100	+	0.661933304790448	0.742976467976468	-0.0810431631860203	-4.95790039802832	9.09207283529897	0.0007594217926573	0.0444251039765799	-0.117963984988005	-0.0441223413840359	0.0163462669032742
chr1:247012746	ZNF670-ZNF695	-	0.665197547550489	0.786616720053253	-0.121419172502764	-7.07551971844409	10.9984121076924	2.05890525065926e-05	0.0140416940667341	-0.159189755427732	-0.0836485895777953	0.0171604599145211
chr1:33682896	CSMD2	-	0.567752201640972	0.666753671165436	-0.0990014695244635	-5.8396553304613	10.452192611925	0.000137746810525677	0.0245820989106407	-0.136555441629006	-0.0614474974199207	0.016953306988521
chr1:36899254	GRIK3	+	0.625736763236763	0.720994637171108	-0.0952578739343446	-5.16082080466142	10.2741742196227	0.000389489679293207	0.0344494296625799	-0.136236340572499	-0.05427940729619	0.01845789217256
chr1:44070441	AL139220.2	-	0.667307461446117	0.785116914149172	-0.117809452703055	-5.24009033063051	10.94967250414	0.000280998851854029	0.030684865107413	-0.167320495685779	-0.0682984097203315	0.022482332415991
chr1:46096957	PIK3R3	+	0.466798707191175	0.375266597867217	0.0915321093239584	4.96384991071984	9.89740693707079	0.000584547436829753	0.0403185654944841	0.050388003336247	0.13267621531167	0.0184397415252801
chr1:46096957	AL358075.4	+	0.466798707191175	0.375266597867217	0.0915321093239584	4.96384991071984	9.89740693707079	0.000584547436829753	0.0403185654944841	0.050388003336247	0.13267621531167	0.0184397415252801
chr1:47164078	CYP4A22-AS1	+	0.630878010878011	0.719162950339421	-0.08828493946141	-4.65364083538127	10.2043048444182	0.000855675768933057	0.0464593168850565	-0.130440869785092	-0.0461290091377279	0.0189711545399436
chr1:48358640	SPATA6	+	0.632734137944222	0.74707190957191	-0.114337771627688	-8.56087988951723	6.80115653527008	6.95859983581859e-05	0.019815532830661	-0.146107468328665	-0.0825680749267104	0.0133558434533924
chr1:49736125	AGBL4	+	0.59060037054952	0.673274280067758	-0.0826739095182379	-4.61419543935984	9.89503493055171	0.000985972262946421	0.0488808314297363	-0.1226536126316	-0.0426942064048761	0.0179172968732568
chr1:52255709	ZFYVE9	-	0.646209242965951	0.728225095294988	-0.0820158523290369	-4.641420005826	10.6623762947199	0.000776338111140182	0.0447801301694567	-0.121058972652471	-0.0429727320056023	0.0176704224625414
chr1:53563834	GLIS1	+	0.387184210001333	0.300829824707118	0.0863543852942159	6.96854881428563	10.8911706328364	2.49000982347857e-05	0.0145288435894105	0.0590464481535834	0.113662322434848	0.012392018423863
chr1:53563886	GLIS1	+	0.365119047619048	0.277281639928699	0.0878374076903489	6.23408516786874	9.11848757307981	0.00014425480322041	0.02487965660302	0.0560269453209716	0.119647870059726	0.0140898632798721
chr1:53563908	GLIS1	+	0.4247768856759	0.330857214680744	0.0939196709951564	4.82783069671639	10.1716735694717	0.000661200578415907	0.0422002776908926	0.0506728543115933	0.137166487678719	0.0194538037671941
chr1:55808247	AL603840.1	+	0.639548546691404	0.791339869281046	-0.151791322589642	-9.08164818577349	10.7791376755578	2.22535725095743e-06	0.00756426701177495	-0.188670920836472	-0.114911724342812	0.0167140721028398
chr1:55896523	AL603840.1	-	0.623954575082395	0.723260447045613	-0.0993058719632187	-6.82742663980098	7.46006308372622	0.000185114480674131	0.026873339296064	-0.133274317398154	-0.0653374265282834	0.01454513936251
chr1:55896523	LINC01755	-	0.623954575082395	0.723260447045613	-0.0993058719632187	-6.82742663980098	7.46006308372622	0.000185114480674131	0.026873339296064	-0.133274317398154	-0.0653374265282834	0.01454513936251
chr1:56352012	AC119674.1	-	0.626059749954045	0.710475086091784	-0.0844153361377398	-7.03604648217301	9.53359844101434	4.54368427122681e-05	0.0174523356439402	-0.111325882672426	-0.0575047896030536	0.0119975523685951
chr1:56352012	AC119674.2	-	0.626059749954045	0.710475086091784	-0.0844153361377398	-7.03604648217301	9.53359844101434	4.54368427122681e-05	0.0174523356439402	-0.111325882672426	-0.0575047896030536	0.0119975523685951
chr1:56590092	PLPP3	+	0.662506548073775	0.755764163372859	-0.0932576152990841	-5.39904991823608	10.8256416867157	0.000229345078284752	0.0287361268191421	-0.131350000610204	-0.0551652299879646	0.0172729677834785
chr1:56757895	FYB2	-	0.615876958070678	0.719723303067334	-0.103846344996656	-7.06080183435805	10.7115668238234	2.41255557104147e-05	0.0145288435894105	-0.136323876301014	-0.0713688136922985	0.0147074436349902
chr1:58335167	DAB1	+	0.60447914658441	0.700066206359113	-0.0955870597747028	-7.19032618965022	9.06306670454398	4.95480139656758e-05	0.0179360194829095	-0.12562795018256	-0.0655461693668461	0.013293841927824
chr1:59252127	AC093425.1	+	0.546088236464176	0.643956698634118	-0.0978684621699416	-5.92911475242071	10.9502603445942	0.000100696206780092	0.0222962927221696	-0.134218993214324	-0.0615179311255595	0.016506420647363
chr1:6012135	KCNAB2	+	0.611596839692815	0.698737373737374	-0.0871405340445588	-5.57985423595193	7.55286439681484	0.000639687245306784	0.0416945972050667	-0.123527878771064	-0.0507531893180537	0.0156169911183518
chr1:68001785	GNG12-AS1	-	0.640990870032223	0.730757389162562	-0.0897665191303382	-5.36452235795846	10.9916905831612	0.00022928033362015	0.0287361268191421	-0.126599807874539	-0.052933230386137	0.0167333665777656
chr1:69882061	LRRC7	+	0.648613872690344	0.735190434382708	-0.0865765616923641	-5.04068670628083	10.572052318179	0.000426562781299147	0.0354637892300983	-0.124567229890072	-0.0485858934946562	0.0171755490347153
chr1:69918532	LRRC7	+	0.570606575963719	0.66374269005848	-0.0931361140947607	-5.54646968963344	8.67975102533216	0.000407337445984076	0.0348444720102639	-0.131336895025379	-0.054935333164143	0.0167919630515309
chr1:70760480	LINC01788	-	0.531171272336686	0.622004070080344	-0.0908327977436586	-5.81592730910442	6.51471763320238	0.000847063195991782	0.0462668462000623	-0.128328411669669	-0.053337183817648	0.0156179389658922
chr1:71689765	NEGR1	+	0.596037761072471	0.695478995478995	-0.0994412344065249	-4.54741209022887	10.6894519225768	0.000896545677245166	0.0471978364998277	-0.147742765782948	-0.0511397030301013	0.0218676540488153
chr1:72796796	LINC02797	-	0.618657449484517	0.702345752850139	-0.0836883033656216	-6.30719829898027	10.9914422397526	5.79926968325786e-05	0.018711329048677	-0.112895283039086	-0.0544813236921576	0.0132686970344903
chr1:72796796	AL583808.1	-	0.618657449484517	0.702345752850139	-0.0836883033656216	-6.30719829898027	10.9914422397526	5.79926968325786e-05	0.018711329048677	-0.112895283039086	-0.0544813236921576	0.0132686970344903
chr1:74360429	FPGT-TNNI3K	-	0.543025426953998	0.642418926103137	-0.0993934991491383	-6.3468699198948	9.00802387142129	0.000132851082525364	0.0243090234608134	-0.134814611124114	-0.0639723871741621	0.0156602388899733
chr1:74360429	AC093158.1	-	0.543025426953998	0.642418926103137	-0.0993934991491383	-6.3468699198948	9.00802387142129	0.000132851082525364	0.0243090234608134	-0.134814611124114	-0.0639723871741621	0.0156602388899733
chr1:74360429	TNNI3K	-	0.543025426953998	0.642418926103137	-0.0993934991491383	-6.3468699198948	9.00802387142129	0.000132851082525364	0.0243090234608134	-0.134814611124114	-0.0639723871741621	0.0156602388899733
chr1:75851473	MSH4	-	0.657954847490836	0.769188374977849	-0.111233527487013	-5.27714150938361	7.63805475321847	0.000870155768113682	0.0466823055905799	-0.160244190320994	-0.0622228646530317	0.0210783673868176
chr1:82758879	AL157944.1	-	0.601272281167672	0.707027929668931	-0.105755648501259	-7.05204318999838	10.2634495170713	3.04997741229284e-05	0.0156518122730343	-0.139053936830584	-0.0724573601719343	0.0149964550204752
chr1:82988049	LINC01362	-	0.630884562409667	0.711135355872198	-0.0802507934625313	-4.78624478556322	9.48474390539358	0.000856864305489517	0.0464670136076932	-0.11788685220325	-0.0426147347218129	0.0167669638846288
chr1:84158379	PRKACB	-	0.66421568627451	0.786221153100949	-0.122005466826439	-10.8862517067093	9.84879779629879	8.27282454939962e-07	0.0054556958419772	-0.147028945791829	-0.0969819878610485	0.0112072979858848
chr1:84879084	LPAR3	-	0.541775684632827	0.622038944452738	-0.0802632598199101	-4.90607904766831	10.9157233965333	0.000477716669011362	0.0371412077719075	-0.116305237768317	-0.0442212818715031	0.0163599605795297
chr1:85564485	AC092807.4	+	0.578371058568355	0.676089845826688	-0.0977187872583331	-5.34226559242256	9.30053643691129	0.000418161345543153	0.0352452182659608	-0.138894418983597	-0.0565431555330689	0.018291637801935
chr1:85564485	DDAH1	+	0.578371058568355	0.676089845826688	-0.0977187872583331	-5.34226559242256	9.30053643691129	0.000418161345543153	0.0352452182659608	-0.138894418983597	-0.0565431555330689	0.018291637801935
chr1:85778092	COL24A1	-	0.505191957165641	0.596970398694537	-0.0917784415288952	-4.96199794850335	10.9581111978356	0.000432335735599695	0.0356276539107247	-0.132507446443871	-0.0510494366139192	0.018496267527998
chr1:86293086	LINC02795	-	0.489593490017938	0.632368223786988	-0.14277473376905	-4.80960825767044	10.4454708300686	0.000630577862461822	0.0414009753604942	-0.208537364972238	-0.0770121025658617	0.0296853145038061
chr1:86658817	CLCA4-AS1	+	0.648128478664193	0.735236732797708	-0.0871082541335154	-7.82744910735469	10.9971536229099	8.04489097495844e-06	0.0105609337903018	-0.111602827857762	-0.0626136804092689	0.0111285621840286
chr1:88193474	PKN2-AS1	+	0.665274065765539	0.770862834495081	-0.105588768729542	-5.3120273831536	10.7649255456551	0.0002665345642187	0.030146906882639	-0.149455257065916	-0.0617222803931684	0.0198773012850806
chr1:88254692	PKN2-AS1	-	0.597089947089947	0.703242378013545	-0.106152430923598	-7.01923674431176	9.30090079810495	5.24961764236588e-05	0.0182637843418767	-0.140195227635377	-0.0721096342118192	0.0151230731759577
chr1:88589978	PKN2-AS1	+	0.602085307807333	0.693491541353383	-0.0914062335460499	-5.7967494687538	9.50958970245272	0.000210950382757504	0.0280036336224095	-0.126787868318384	-0.0560245987737156	0.0157685326990164
chr1:88589992	PKN2-AS1	+	0.655062288073124	0.744652589761285	-0.0895903016881615	-6.45689015633457	10.8478637442536	5.01062683275277e-05	0.0179960594222746	-0.120181630925501	-0.0589989724508225	0.0138751472487523
chr1:91341756	HFM1	+	0.64086509846636	0.733968488126703	-0.0931033896603435	-6.64663735853686	9.14634088953805	8.72933952025649e-05	0.0210618349632415	-0.124713649985653	-0.0614931293350336	0.0140075928079275
chr1:93513115	FNBP1L	+	0.604724904724905	0.689696108489212	-0.0849712037643072	-5.06224822593612	10.570882780453	0.000412895287741295	0.0350774580261653	-0.122099135922826	-0.0478432716057886	0.016785270095797
chr1:94219650	ARHGAP29	-	0.636054071978442	0.718349134525605	-0.0822950625471633	-7.63987253547007	10.1214361487336	1.64051819322011e-05	0.0134329535745402	-0.106257119011896	-0.0583330060824304	0.0107717847601629
chr1:99229121	AL445433.2	-	0.604809423769508	0.698896103896104	-0.094086680126596	-4.65139753097725	9.74663537297178	0.00097018268249604	0.0485974915330264	-0.139315929902471	-0.0488574303507216	0.0202276153564601
chr10:105894954	AL731574.1	+	0.603297840875481	0.724142732309701	-0.120844891434221	-4.93376454267356	8.61465391148897	0.000920522687402227	0.0476316658007678	-0.17663303416224	-0.0650567487062013	0.024493445195651
chr10:108723025	LINC02661	+	0.584253275810704	0.698186265164292	-0.113932989353588	-9.50250465072733	9.7240536553855	3.11596766745397e-06	0.00826290179759327	-0.140751013341694	-0.0871149653654826	0.0119897851715198
chr10:108723033	LINC02661	+	0.59931603236688	0.685494341094195	-0.0861783087273151	-9.27538032939405	10.507235722809	2.19462761315181e-06	0.00756426701177495	-0.106745458981417	-0.0656111584732133	0.0092910808685885
chr10:115475767	ATRNL1	-	0.647104134849708	0.453869394494395	0.193234740355314	5.18208777384564	9.53365385175379	0.000480255764102064	0.0372156024711355	0.109595525720742	0.276873954989886	0.0372889747893857
chr10:115485653	ATRNL1	-	0.615998706837216	0.698818303038252	-0.0828195962010357	-6.5692446369913	10.5235953487228	4.97009313191986e-05	0.0179560404696267	-0.110721826755761	-0.0549173656463103	0.0126071718709759
chr10:115578910	ATRNL1	-	0.347737483617387	0.490999246750012	-0.143261763132626	-5.41423712699916	7.54281843658492	0.000774402111043896	0.0447538248835998	-0.204928861530472	-0.0815946647347786	0.0264601937026774
chr10:115600602	ATRNL1	-	0.626075665900291	0.468251291021156	0.157824374879135	5.68832144625326	10.4974716721273	0.000167825082982718	0.0260347012191317	0.0963987379530846	0.219250011805186	0.0277453333765253
chr10:115628515	ATRNL1	-	0.585586313091217	0.684219070403281	-0.0986327573120642	-7.65610722588108	10.172546375534	1.56406922382692e-05	0.0132016984061616	-0.127271755701845	-0.0699937589222832	0.012882886093685
chr10:122027457	TACC2	-	0.636392462354426	0.737164750957854	-0.100772288603428	-5.66200605087629	10.374104539738	0.000182153750504938	0.0267373183752306	-0.140235675478523	-0.061308901728333	0.017797983205587
chr10:122736983	DMBT1P1	-	0.603681799333973	0.714006734006734	-0.110324934672761	-6.04694013218814	6.70411525401316	0.000610598543194029	0.0409869770136515	-0.153855927740457	-0.066793941605064	0.0182447539186796
chr10:125985459	FANK1	-	0.323031135531136	0.47743907279511	-0.154407937263974	-4.63128635070307	10.6628363267917	0.000788891690228129	0.0450253996232683	-0.228073278979573	-0.0807425955483759	0.0333401836059077
chr10:126355102	ADAM12	+	0.636171236171236	0.74415374947633	-0.107982513305094	-7.01383557690096	10.1573113288109	3.37250077359042e-05	0.0161232981363424	-0.142214267457031	-0.0737507591531572	0.0153956436704503
chr10:127005791	DOCK1	-	0.600955199360099	0.712924836601307	-0.111969637241208	-8.84383010675494	9.56619643366302	6.55138022464502e-06	0.00983592166982423	-0.140353941197055	-0.0835853332853617	0.0126607630279652
chr10:127005791	AL359094.1	-	0.600955199360099	0.712924836601307	-0.111969637241208	-8.84383010675494	9.56619643366302	6.55138022464502e-06	0.00983592166982423	-0.140353941197055	-0.0835853332853617	0.0126607630279652
chr10:132273496	STK32C	+	0.662837862417694	0.777104542966612	-0.114266680548918	-6.46424519547972	10.7793168617034	5.1087079155513e-05	0.0181149905024625	-0.153270290015681	-0.0752630710821544	0.0176767243651001
chr10:132273702	STK32C	+	0.636086691086691	0.718545826154522	-0.0824591350678308	-6.43106811251146	10.999658366412	4.86804464351502e-05	0.017879934097905	-0.110680266792325	-0.0542380033433364	0.01282199684799
chr10:14167636	FRMD4A	+	0.68032340466551	0.598417919799499	0.0819054848660111	5.62377432149024	10.1148523172921	0.000211205950765988	0.0280036336224095	0.049504416443142	0.11430655328888	0.0145641485919917
chr10:15836931	MINDY3	+	0.623873322767617	0.728447988532022	-0.104574665764405	-8.18365837127752	10.963956568412	5.37339007972318e-06	0.00969589840442519	-0.132711182251251	-0.0764381492775589	0.0127784740051508
chr10:21674355	MLLT10	-	0.614221384460217	0.707333469000136	-0.0931120845399188	-7.44987647172967	10.693716223553	1.49981638932627e-05	0.0130015102933936	-0.120717473926876	-0.0655066951529621	0.0124984736180868
chr10:24454088	KIAA1217	+	0.635204081632653	0.73492815558033	-0.0997240739476765	-7.18573780808268	10.6753698819768	2.09864242726294e-05	0.0141012918250429	-0.130383180193909	-0.0690649677014435	0.0138780563125341
chr10:26596298	AL160287.1	-	0.625913523304058	0.812384419075462	-0.186470895771404	-8.74972511110734	6.64618860919574	6.9317820353406e-05	0.0197907595023117	-0.237413863921656	-0.135527927621151	0.0213116290401727
chr10:27808541	ARMC4	+	0.623900592495063	0.718711351499664	-0.0948107590046016	-8.06675975052844	7.74098725197808	4.95656224417349e-05	0.0179360194829095	-0.12207250168262	-0.0675490163265833	0.0117532642519062
chr10:27921973	ARMC4	+	0.664935503093398	0.759531590413943	-0.0945960873205456	-7.97439163002848	8.09284338437793	4.18717957782217e-05	0.0170543233685647	-0.121896493754394	-0.0672956808866975	0.0118624832726215
chr10:31295144	ZEB1-AS1	-	0.667245060703707	0.785945150528484	-0.118700089824776	-5.50244444829242	10.997773504535	0.000185687152546384	0.0269215849367306	-0.166181457766853	-0.0712187218826998	0.0215722468332439
chr10:37147691	ANKRD30A	+	0.624568448068883	0.717628284183716	-0.0930598361148335	-6.79279370948911	9.68545043870437	5.59162303398297e-05	0.0184375930821709	-0.123719777426028	-0.0623998948036393	0.0136997883484721
chr10:37219859	ANKRD30A	+	0.591355894220218	0.683676123148864	-0.0923202289286451	-6.24673547364024	6.78317739110947	0.00048254969969023	0.0372940565730484	-0.127494635608657	-0.0571458222486327	0.0147789560352307
chr10:38243531	AL117339.5	+	0.663681556538699	0.763642838642839	-0.0999612821041392	-4.68747251612082	10.7791602658087	0.000700665686381161	0.0430955392265163	-0.147015318043854	-0.0529072461644243	0.0213251985500415
chr10:48514800	ARHGAP22	+	0.635712858570001	0.727840528989954	-0.0921276704199528	-13.8546749418776	10.0051057764567	7.44115822860127e-08	0.00169378764085131	-0.106942817238377	-0.077312523601529	0.00664957285583687
chr10:48515888	ARHGAP22	+	0.606054691259639	0.733209287692983	-0.127154596433344	-16.836157000763	10.3669950237412	7.26936575217079e-09	0.000466319900230276	-0.143902151817014	-0.110407041049675	0.00755247153062197
chr10:52135986	PRKG1	+	0.636411395283576	0.750194033764617	-0.113782638481041	-6.63169839709708	10.8185417630809	4.01071451882696e-05	0.0168860414050863	-0.151623222542864	-0.075942054419218	0.0171573904101018
chr10:52985060	LINC02672	-	0.623321123321123	0.734346862288039	-0.111025738966915	-7.78025137585553	10.7647340079603	9.68804022244754e-06	0.0112036913395411	-0.142518189613852	-0.0795332883199786	0.01427019945801
chr10:53844536	PCDH15	+	0.568218752147324	0.650865981844243	-0.0826472296969192	-6.07672830867783	9.42730562567923	0.000152372221234117	0.0252867291464102	-0.113202681929127	-0.0520917774647112	0.0136006129447807
chr10:54280633	PCDH15	-	0.626737200949024	0.714976118652589	-0.0882389177035656	-5.76870407658994	10.500975101328	0.000149497796916381	0.0251348291463165	-0.122101729747858	-0.0543761056592733	0.015296142171974
chr10:54924915	PCDH15	-	0.616552075375605	0.7253558575927	-0.108803782217095	-5.58471566187553	9.06011919050006	0.000332793282727566	0.0324341719498215	-0.152831541824849	-0.0647760226093405	0.0194824210943902
chr10:55351680	AC016822.1	-	0.329651281935666	0.520434640979106	-0.19078335904344	-5.7417443029857	10.0533430941484	0.000183507057860856	0.0267982207726915	-0.264765454984143	-0.116801263102736	0.0332274216642202
chr10:55351680	PCDH15	-	0.329651281935666	0.520434640979106	-0.19078335904344	-5.7417443029857	10.0533430941484	0.000183507057860856	0.0267982207726915	-0.264765454984143	-0.116801263102736	0.0332274216642202
chr10:61430604	TMEM26	+	0.586051328759392	0.671016542068332	-0.0849652133089404	-6.25371598765312	10.5777348058742	7.39971515712241e-05	0.0202580154800311	-0.11501487351674	-0.0549155531011409	0.0135863562522969
chr10:61959	TUBB8	-	0.43863045167393	0.558976723759332	-0.120346272085403	-5.41835947993661	9.92454610748928	0.000301513575836502	0.0315030698163677	-0.169886137527479	-0.0708064066433256	0.0222108319927881
chr10:65677269	LINC01515	-	0.562361172539191	0.658945221445221	-0.0965840489060302	-7.22614534067499	10.6005661039953	2.07299132329698e-05	0.0140416940667341	-0.126138040479143	-0.0670300573329173	0.0133659156234198
chr10:66227900	CTNNA3	-	0.545752934241778	0.642517055265857	-0.0967641210240786	-6.49649813665114	10.6692456468918	5.13090965895189e-05	0.0181302607910536	-0.129671805045932	-0.0638564370022252	0.0148948124033418
chr10:66706873	CTNNA3	+	0.625503261022428	0.717147204647205	-0.0916439436247769	-6.49048943253812	7.52240723718032	0.000248132856945732	0.0294753547789862	-0.124567456431431	-0.058720430818123	0.0141197277304463
chr10:67192615	CTNNA3	+	0.617191653375864	0.726509492685963	-0.109317839310099	-5.71302478546782	7.47660239044854	0.00057263802977311	0.0401138760920328	-0.153986371843819	-0.0646493067763794	0.019134844222656
chr10:6990567	AL392086.3	-	0.562835502915594	0.644608184689706	-0.081772681774112	-7.13619388836745	10.9034667296566	1.99437286768534e-05	0.0139613025643764	-0.107020743053869	-0.056524620494355	0.0114588649150085
chr10:75943937	LRMDA	-	0.670539427892369	0.763829952297445	-0.0932905244050755	-5.96652808840408	9.1400033584382	0.000198394495401256	0.0274688352132187	-0.128578398304163	-0.0580026505059875	0.0156356465641023
chr10:78483283	AC012560.2	-	0.657975212083069	0.79883273096044	-0.140857518877372	-13.2313051480452	10.5232808657641	6.80829538267904e-08	0.0016566108663299	-0.164418873768481	-0.117296163986262	0.0106457766109477
chr10:78483283	LINC00595	-	0.657975212083069	0.79883273096044	-0.140857518877372	-13.2313051480452	10.5232808657641	6.80829538267904e-08	0.0016566108663299	-0.164418873768481	-0.117296163986262	0.0106457766109477
chr10:78494717	LINC00595	+	0.660888369174637	0.810344769660807	-0.14945640048617	-29.9762224182684	8.57119953539505	5.59338401446072e-10	6.57814588173998e-05	-0.160821736515501	-0.13809106445684	0.00498583171691064
chr10:78494717	AC012560.2	+	0.660888369174637	0.810344769660807	-0.14945640048617	-29.9762224182684	8.57119953539505	5.59338401446072e-10	6.57814588173998e-05	-0.160821736515501	-0.13809106445684	0.00498583171691064
chr10:80545229	SH2D4B	-	0.66516129745506	0.758642763407292	-0.0934814659522319	-7.88585015486472	7.14965619532678	8.92830133022256e-05	0.0213131136971192	-0.121393994788652	-0.0655689371158116	0.0118543294782952
chr10:80625175	SH2D4B	-	0.610007172076138	0.692367656740922	-0.0823604846647846	-6.57719576457316	9.54557599303837	7.76980549902246e-05	0.0204965097803925	-0.110442618283989	-0.0542783510455802	0.0125221276076963
chr10:85908896	GRID1	+	0.617476250030804	0.704982363315697	-0.0875061132848926	-5.7238271610876	10.9796893003515	0.000134363354411366	0.0243919438101529	-0.121162463923385	-0.0538497626463997	0.015288042567006
chr10:86758471	BMPR1A	-	0.440214254344689	0.357344119440894	0.0828701349037955	4.43945000620521	10.9934200159727	0.000997363771872364	0.0490909257543629	0.0417818790838131	0.123958390723778	0.0186667570955782
chr10:94482128	TBC1D12	-	0.630612244897959	0.713786907536908	-0.0831746626389483	-5.79829121804199	10.4823258588107	0.000144363356966752	0.02487965660302	-0.11493838268716	-0.0514109425907371	0.0143446852721267
chr10:94807458	CYP2C19	-	0.564922097871407	0.699175824175824	-0.134253726304417	-5.28305145528477	10.6195049189392	0.000291405184185274	0.0310937492154817	-0.190430982171522	-0.0780764704373124	0.0254121557286973
chr10:94807458	AL583836.1	-	0.564922097871407	0.699175824175824	-0.134253726304417	-5.28305145528477	10.6195049189392	0.000291405184185274	0.0310937492154817	-0.190430982171522	-0.0780764704373124	0.0254121557286973
chr10:94976537	CYP2C9	-	0.484252589515747	0.583281521110468	-0.0990289315947211	-7.62157107873684	10.8839627229884	1.09871973162564e-05	0.0118005342134803	-0.127664111170466	-0.0703937520189762	0.0129932438563748
chr10:98432616	HPS1	-	0.646976562480691	0.789404765266834	-0.142428202786143	-27.2488973640824	9.22914721985996	3.90684608840017e-10	5.51361467917651e-05	-0.154207749490074	-0.130648656082212	0.00522693453915248
chr10:98504099	HPSE2	-	0.605616169544741	0.688054532486817	-0.0824383629420761	-4.6802354915535	10.4747444111204	0.000765501023219947	0.0445403952917146	-0.121445352478991	-0.0434313734051614	0.0176141484954879
chr10:98732167	HPSE2	+	0.497172307658241	0.597619047619048	-0.100446739960806	-8.62457403349732	8.96516550138476	1.23866813984985e-05	0.012308483387807	-0.126808733891288	-0.0740847460303248	0.0116465740302857
chr10:98765713	HPSE2	+	0.566492237920809	0.668067226890756	-0.101574988969947	-7.38112251033923	10.7374972394788	1.594778773281e-05	0.0133017933768811	-0.131954336719074	-0.0711956412208199	0.0137614555005237
chr11:100048837	CNTN5	+	0.569321078531605	0.67090301660525	-0.101581938073645	-9.01550229006545	6.30646912109757	7.83622524690068e-05	0.0205463039342162	-0.128830912596666	-0.0743329635506249	0.0112674740469627
chr11:100799727	ARHGAP42	+	0.552329685497387	0.656001185299431	-0.103671499802044	-6.99990546379576	7.85712826266838	0.000122837213850825	0.0236232412655552	-0.137932776849614	-0.0694102227544736	0.0148104142746275
chr11:100904467	ARHGAP42	-	0.607211057119716	0.700314930918379	-0.0931038737986629	-5.47134310390347	10.4709296749789	0.000231616680197636	0.0288304569282404	-0.130789432274103	-0.0554183153232233	0.017016639613085
chr11:100909285	ARHGAP42	-	0.57057358441249	0.654460295788916	-0.0838867113764258	-6.86590131797583	10.5503857785634	3.34323386321154e-05	0.0161232981363424	-0.110918551163455	-0.0568548715893966	0.0122178731518904
chr11:101900964	ANGPTL5	-	0.657321844821845	0.752706552706553	-0.0953847078847079	-6.03242236297021	10.7598655528543	9.34178591286428e-05	0.0216357936660892	-0.13028169871648	-0.0604877170529361	0.0158120075394958
chr11:105017526	CASP5	+	0.640582026511496	0.741543397323151	-0.100961370811655	-7.38146738873963	6.31829883975574	0.00024885731485376	0.0295018950542204	-0.134024974340441	-0.0678977672828702	0.0136776829720431
chr11:105750399	GRIA4	+	0.598763086091041	0.683805252608866	-0.0850421665178254	-9.75543038472259	10.9891766378545	9.53755139856721e-07	0.00585922069276081	-0.10423138049164	-0.0658529525440103	0.00871741821365513
chr11:109912655	RDX	+	0.622595739150361	0.709935666185666	-0.0873399270353051	-7.70044793934723	9.7786294543817	1.86937327206098e-05	0.0136666101194708	-0.112689660426949	-0.0619901936436615	0.0113421878471539
chr11:110382875	LINC02732	-	0.656086889301175	0.821641059169663	-0.165554169868488	-14.0906428591733	10.828000311497	2.62978020442628e-08	0.00103092497475019	-0.191464251164633	-0.139644088572343	0.0117492275918916
chr11:11111068	LINC02752	+	0.648496584868765	0.768955601564297	-0.120459016695532	-7.24169976282138	10.9705015809956	1.68626082857538e-05	0.0135948936669268	-0.15708239532166	-0.0838356380694032	0.016634080483972
chr11:118048797	SMIM35	+	0.587890780090733	0.677046029813478	-0.0891552497227456	-6.09570744812923	10.5043606343408	9.46151538227514e-05	0.0217542404912731	-0.121532945638537	-0.056777553806954	0.0146259069158752
chr11:119609380	AP003393.1	-	0.579278378017874	0.659628237259816	-0.0803498592419424	-5.75226423372248	10.9324986784579	0.000131022594557973	0.0242090420994559	-0.111117249993976	-0.049582468489909	0.0139683880950554
chr11:121677727	AP001977.1	-	0.587739549261	0.690625264852954	-0.102885715591954	-6.8139782525662	10.6873314317021	3.35033197430329e-05	0.0161232981363424	-0.136237870166306	-0.0695335610176009	0.0150992139655283
chr11:124573464	OR8A1	+	0.563910988671591	0.664204400392955	-0.100293411721364	-5.99938042945959	10.9631747736772	9.05886937190595e-05	0.0214358316269855	-0.137103014334812	-0.0634838091079166	0.0167172948774643
chr11:127153881	AP001993.1	-	0.593389578053444	0.705738806282285	-0.112349228228841	-5.99538528675861	6.21884981161313	0.000849018981790612	0.0462931513607836	-0.157814279260884	-0.0668841771967978	0.0187392841085585
chr11:129169413	ARHGAP32	+	0.658894989722057	0.765453805453805	-0.106558815731748	-8.09450787820714	10.5421089686287	7.6435380359402e-06	0.010314977044711	-0.135687608652605	-0.0774300228108913	0.0131643352919128
chr11:12928067	TEAD1	-	0.612715131564283	0.699379324379324	-0.0866641928150416	-6.48181208479119	10.7803631766267	4.98669333413604e-05	0.0179560404696267	-0.116165483089822	-0.0571629025402615	0.0133703649043435
chr11:129852135	TMEM45B	-	0.626663594730822	0.744528619528619	-0.117865024797798	-9.70607067838626	10.9613889324244	1.0233431155946e-06	0.00596791881611618	-0.144604032904776	-0.0911260166908194	0.0121434335997844
chr11:1460371	BRSK2	-	0.615986954222248	0.701756694918981	-0.0857697406967327	-4.63800252350093	10.0814916786116	0.000905154194990831	0.0473541405171248	-0.126929206587272	-0.044610274806193	0.0184928188939386
chr11:16547609	SOX6	+	0.636098086831987	0.717960205503309	-0.0818621186713222	-6.59302018359816	9.3121414956597	8.55116544374136e-05	0.0209619802847918	-0.109807287079587	-0.0539169502630572	0.0124164823391525
chr11:16593006	SOX6	+	0.66377146662861	0.799990628280102	-0.136219161651492	-11.1334004547143	8.96610038358535	1.50078491819904e-06	0.00691471825979833	-0.163913022396705	-0.10852530090628	0.0122351802762841
chr11:1742562	AC068580.4	+	0.601191931317982	0.708849260951944	-0.107657329633962	-5.30791342991503	8.10087201242173	0.000692363698673071	0.0429613136223331	-0.154327493809261	-0.0609871654586642	0.0202824200235093
chr11:1742562	IFITM10	+	0.601191931317982	0.708849260951944	-0.107657329633962	-5.30791342991503	8.10087201242173	0.000692363698673071	0.0429613136223331	-0.154327493809261	-0.0609871654586642	0.0202824200235093
chr11:18165577	AC090099.1	+	0.513555977113484	0.607741004944952	-0.0941850278314682	-5.85926724712619	10.5589835662556	0.000128721889378515	0.0240574566415466	-0.129745980161692	-0.0586240755012446	0.0160745403578687
chr11:18182347	AC090099.1	+	0.628227743955069	0.728884474443685	-0.100656730488616	-5.09723486586483	10.8775087891556	0.000357893890570367	0.0333009323922732	-0.144180079376438	-0.0571333816007936	0.019747320485994
chr11:20600477	SLC6A5	+	0.398817479703626	0.522460276943921	-0.123642797240296	-7.04427905861316	10.779828271094	2.38296207103598e-05	0.0145098416522383	-0.162371478436813	-0.0849141160437783	0.0175522287251121
chr11:20793303	NELL1	-	0.574936752686612	0.65512201350911	-0.0801852608224981	-4.63365845124027	10.9972863660914	0.000724550584421401	0.043668102373958	-0.118274361339518	-0.0420961603054786	0.01730495712325
chr11:21522864	NELL1	-	0.627296329159683	0.71269425019425	-0.085397921034567	-4.80935439678148	10.7057762813979	0.000588453184546987	0.0403773950182374	-0.124611442584836	-0.0461843994842976	0.0177566288505827
chr11:22329210	AC104009.1	+	0.625099690225741	0.710832004253057	-0.0857323140273163	-5.36994473575427	9.02376482050745	0.000446385683288304	0.0360477639765556	-0.121833642486675	-0.0496309855679578	0.0159652134697945
chr11:27070590	BBOX1	-	0.637449017148265	0.738639158747854	-0.101190141599589	-5.22313457012209	7.49109189825067	0.000986019336584589	0.0488808314297363	-0.146399240503151	-0.0559810426960274	0.0193734509883064
chr11:27070590	BBOX1-AS1	-	0.637449017148265	0.738639158747854	-0.101190141599589	-5.22313457012209	7.49109189825067	0.000986019336584589	0.0488808314297363	-0.146399240503151	-0.0559810426960274	0.0193734509883064
chr11:29372798	LINC02755	-	0.34455545757586	0.216555149994733	0.128000307581127	5.43145629529611	9.61625594536494	0.000330377865383561	0.0323767378308228	0.075205494468949	0.180795120693305	0.0235664802627577
chr11:29598348	LINC02546	+	0.66243975927279	0.743273046398046	-0.0808332871252563	-6.27080389825521	10.7705244269895	6.6756605317318e-05	0.0195368371163416	-0.109278832353892	-0.0523877418966206	0.012890418586961
chr11:29598348	LINC02755	+	0.66243975927279	0.743273046398046	-0.0808332871252563	-6.27080389825521	10.7705244269895	6.6756605317318e-05	0.0195368371163416	-0.109278832353892	-0.0523877418966206	0.012890418586961
chr11:30054121	AL358944.1	-	0.529503176027803	0.614664271603762	-0.0851610955759595	-8.96735884994027	6.97714708515141	4.45479536356176e-05	0.017377115598141	-0.107632347263221	-0.0626898438886977	0.00949678684672318
chr11:31868399	AL035078.4	-	0.671749059443868	0.758459221307519	-0.086710161863651	-4.750242032815	9.41333980393339	0.000921923162404878	0.0476545282372897	-0.12772847142033	-0.0456918523069722	0.0182538408074054
chr11:31868399	PAUPAR	-	0.671749059443868	0.758459221307519	-0.086710161863651	-4.750242032815	9.41333980393339	0.000921923162404878	0.0476545282372897	-0.12772847142033	-0.0456918523069722	0.0182538408074054
chr11:32946213	QSER1	-	0.438992408557626	0.257728554704129	0.181263853853497	7.13362456880035	7.04133829541065	0.000182870355730164	0.0267711402474618	0.121250698018355	0.241277009688638	0.0254097832182356
chr11:33549897	KIAA1549L	+	0.654806659505908	0.738398032613719	-0.0835913731078112	-6.33358146378869	10.0294365769877	8.41981905575819e-05	0.0209106946144722	-0.112986923683233	-0.0541958225323892	0.0131981207766463
chr11:34466775	CAT	+	0.632241356534443	0.748569519763692	-0.11632816322925	-5.37980066569876	8.39962651237722	0.000561744545296603	0.0398378504744089	-0.165781273423722	-0.0668750530347773	0.0216231363312306
chr11:3544924	AC127526.2	+	0.56031202995032	0.684911178719228	-0.124599148768908	-5.24524104321837	10.7302231797608	0.000298045271745503	0.0314122081167487	-0.177043725989642	-0.0721545715481748	0.0237547040721806
chr11:41701170	LINC02741	+	0.584131146631147	0.680211558307534	-0.0960804116763869	-4.63859702607573	10.8756187518101	0.000740139569047426	0.0440505759300235	-0.141733657767029	-0.0504271655857445	0.0207132482378344
chr11:43600503	AC068205.1	-	0.607870492081018	0.721549351549352	-0.113678859468333	-6.80601268980105	10.4888497813241	3.71640713689872e-05	0.0166625219869005	-0.15066104173633	-0.076696677200336	0.0167027104781458
chr11:43600503	AC068205.2	-	0.607870492081018	0.721549351549352	-0.113678859468333	-6.80601268980105	10.4888497813241	3.71640713689872e-05	0.0166625219869005	-0.15066104173633	-0.076696677200336	0.0167027104781458
chr11:49661943	AC136759.1	-	0.618872621512373	0.702565780018487	-0.0836931585061144	-7.39872359724373	10.9710695826636	1.38247411955958e-05	0.0126806687967529	-0.108598357259498	-0.0587879597527312	0.011311837427917
chr11:5263482	AC104389.5	+	0.624323131826105	0.712234862307206	-0.0879117304811005	-6.51089787249625	7.45585376496502	0.00025261941546612	0.0296751369010711	-0.119447972597457	-0.0563754883647438	0.0135022438076418
chr11:5263482	HBG2	+	0.624323131826105	0.712234862307206	-0.0879117304811005	-6.51089787249625	7.45585376496502	0.00025261941546612	0.0296751369010711	-0.119447972597457	-0.0563754883647438	0.0135022438076418
chr11:5829125	TRIM5	+	0.652800664032191	0.745703933747412	-0.0929032697152209	-7.04920334238553	9.83285115324448	3.81985487074453e-05	0.0166625219869005	-0.12233629049689	-0.0634702489335519	0.0131792580243233
chr11:5915767	TRIM5	+	0.592850279283754	0.680832194625298	-0.0879819153415439	-5.46841611481617	9.0144488253946	0.000393861753894576	0.0345159759947093	-0.124369106327207	-0.0515947243558812	0.0160891039551955
chr11:60438620	MS4A5	+	0.608815919530205	0.689335510168844	-0.0805195906386383	-5.28914797272886	7.47019338444785	0.000922112605740863	0.0476545282372897	-0.116063291322509	-0.044975889954768	0.0152235466002846
chr11:60538261	MS4A13	+	0.615222788906999	0.711324555074555	-0.0961017661675556	-5.13814145281718	10.956111481951	0.000328323405165621	0.0323203105842077	-0.137288250870165	-0.0549152814649466	0.0187036046107419
chr11:63190379	SLC22A10	-	0.574028391646136	0.656683267603735	-0.0826548759575984	-5.88550084315142	9.39530055900904	0.000197072084391534	0.0274369756347874	-0.11422159563929	-0.0510881562759069	0.0140438134596104
chr11:63190379	SLC22A25	-	0.574028391646136	0.656683267603735	-0.0826548759575984	-5.88550084315142	9.39530055900904	0.000197072084391534	0.0274369756347874	-0.11422159563929	-0.0510881562759069	0.0140438134596104
chr11:6526443	DNHD1	-	0.60249740444064	0.506187678062678	0.0963097263779624	6.23217084673207	10.5449647851137	7.72379708475168e-05	0.0204703377341339	0.0621165604691259	0.130502892286799	0.0154536402718266
chr11:71675087	AP003498.1	-	0.569218596529521	0.652597402597403	-0.0833788060678817	-7.30836408913648	10.1598507354266	2.36325404822662e-05	0.0144742715553222	-0.10874482658388	-0.0580127855518833	0.0114086825794325
chr11:71724949	AP003498.1	+	0.605100322957466	0.71264339299427	-0.107543070036804	-5.71169806200176	10.101087537625	0.000187855141926849	0.0270444589730688	-0.149438884277388	-0.0656472557962208	0.0188285635671564
chr11:71724949	ENPP7P8	+	0.605100322957466	0.71264339299427	-0.107543070036804	-5.71169806200176	10.101087537625	0.000187855141926849	0.0270444589730688	-0.149438884277388	-0.0656472557962208	0.0188285635671564
chr11:7264556	SYT9	+	0.475457875457875	0.563385798983625	-0.0879279235257496	-4.9122463392793	10.7440965492316	0.00049560357607227	0.0377559605688223	-0.127439770644613	-0.0484160764068866	0.0178997382160297
chr11:74172064	PPME1	+	0.364118724412842	0.271820771820772	0.0922979525920702	7.47138778374711	10.9199765686977	1.29662254631618e-05	0.0124909674818869	0.0650837044344773	0.119512200749663	0.0123535218976119
chr11:8120525	RIC3	+	0.667672683108331	0.797049274255157	-0.129376591146826	-5.10681920418074	7.97476613213265	0.000931107246252706	0.047814705022162	-0.187829287762076	-0.0709238945315754	0.0253340848724212
chr11:83339607	AP000446.1	-	0.654987258061119	0.740290398752286	-0.085303140691167	-6.49749363389444	7.24003891167827	0.000290291040682813	0.0310405711406324	-0.116139965164624	-0.0544663162177095	0.0131286224346846
chr11:83339774	AP000446.1	-	0.626364341589906	0.743967300633967	-0.117602959044062	-17.0782094902312	10.9980578744529	2.89444971192934e-09	0.000255303127809657	-0.132759579801722	-0.102446338286401	0.00688614102733258
chr11:8397929	STK33	+	0.641741602455888	0.733833255524432	-0.0920916530685438	-4.77324761022743	10.6193946456121	0.000637143357474481	0.0416274433596795	-0.134742326212489	-0.049440979924599	0.0192932905620113
chr11:84185949	DLG2	-	0.600418829739254	0.684378660555131	-0.0839598308158777	-5.79991731780573	6.6088603801853	0.000817043647216137	0.0456588518984421	-0.118605223709628	-0.049314437922127	0.0144760392632014
chr11:85187494	DLG2	+	0.60819873403907	0.689769214703425	-0.081570480664355	-7.67636165152288	8.84073709067364	3.39618237919516e-05	0.0161786510823253	-0.10567476611641	-0.0574661952123004	0.0106261904229294
chr11:86256045	EED	+	0.659137379648216	0.747091503267974	-0.0879541236197583	-4.91278277729578	10.9021233905522	0.000474411970977054	0.0370593690914366	-0.127401822304928	-0.0485064249345885	0.0179031167480546
chr11:87874613	AP000676.5	+	0.568987946055615	0.656776476195714	-0.0877885301400987	-8.39062339187393	10.0259552792394	7.60847873813274e-06	0.010314977044711	-0.111092688576223	-0.0644843717039739	0.0104626946104051
chr11:87934894	AP000676.5	+	0.668627450980392	0.7496336996337	-0.0810062486533075	-5.5164250564267	6.90717748602409	0.000932214005051382	0.0478334762884197	-0.115824523440943	-0.0461879738656724	0.0146845552735162
chr11:88672486	GRM5	+	0.602435902590701	0.717152255639098	-0.114716353048396	-6.62842077708049	9.98328110709208	5.91216468079916e-05	0.0188458115741808	-0.153286927574495	-0.0761457785222981	0.0173067397056412
chr11:89230669	TYR	+	0.524918064391749	0.621522181522182	-0.0966041171304329	-5.76550536945977	10.7081636134534	0.000139253611605526	0.0246737128286407	-0.133605794532039	-0.0596024397288272	0.0167555332863188
chr11:90551948	DISC1FP1	-	0.569042201858423	0.656926655719759	-0.0878844538613358	-6.05307520934207	10.9854967649572	8.31857344725598e-05	0.0208790089772647	-0.119845652700295	-0.0559232550223764	0.0145189760282011
chr11:90624579	DISC1FP1	+	0.671084213692909	0.777129376471482	-0.106045162778572	-6.33778630842826	8.10009428370533	0.000212036527403643	0.0280228918146252	-0.144546869680852	-0.0675434558762927	0.0167322086321448
chr11:90750169	DISC1FP1	-	0.580321708007859	0.664500777000777	-0.0841790689929182	-4.75407785220788	10.0567143521593	0.0007633967305512	0.0445088665986529	-0.123601935490547	-0.0447562024952898	0.0177067081376936
chr11:90808861	DISC1FP1	+	0.551326232247285	0.632826668216694	-0.0815004359694089	-6.34634666283268	10.5510632733425	6.60256000687886e-05	0.0194796915245452	-0.109913140240873	-0.0530877316979448	0.012842102756018
chr11:92679113	FAT3	-	0.639014202172097	0.74021164021164	-0.101197438039543	-4.58355339119518	9.92445506365092	0.00102507582303178	0.0496171211082126	-0.150441941582493	-0.0519529344965936	0.0220783809857957
chr11:94982192	KDM4D	-	0.638377233392968	0.725830941172872	-0.087453707779904	-7.50180736266184	9.52606033634434	2.69835091236744e-05	0.0150072089387202	-0.113604888857005	-0.0613025267028026	0.0116576850820218
chr11:96384410	CCDC82	-	0.61609415696103	0.532133467307886	0.0839606896531441	5.97833873387884	7.77365887801018	0.000370508080400334	0.0337956914831036	0.0514099487411821	0.116511430565106	0.014044150622872
chr11:96435857	JRKL	-	0.669063323269811	0.766457811194653	-0.097394487924842	-7.47045838772948	8.51418283353816	5.13104457185559e-05	0.0181302607910536	-0.127145400679449	-0.0676435751702352	0.0130372840420096
chr11:96724142	AP003066.1	-	0.595373376623377	0.687540860852642	-0.0921674842292658	-5.61492107188919	10.9741137809562	0.000158162384478006	0.0255235147974009	-0.128306489442238	-0.0560284790162933	0.0164147426204613
chr11:96933201	AP003066.1	-	0.628671751528894	0.724043458781362	-0.0953717072524676	-5.65952609990008	10.5604558853969	0.000171004228606001	0.0262401024446956	-0.132650907052055	-0.0580925074528804	0.0168515359005326
chr11:99114610	CNTN5	-	0.542275861682012	0.648685634540898	-0.106409772858885	-4.99356037349288	9.89805790494644	0.000559520650257298	0.039776078384476	-0.153956441772673	-0.0588631039450983	0.0213093994865339
chr12:102243555	HELLPAR	-	0.622787059487827	0.735064412238325	-0.112277352750499	-7.09584182019811	10.6947953191925	2.32700868416559e-05	0.0143533109514964	-0.147225135170143	-0.0773295703308544	0.0158229785267908
chr12:102446823	LINC02456	-	0.641024069699206	0.730902777777778	-0.089878708078572	-5.60276745117514	10.47240703931	0.000191412512547318	0.0271743241619429	-0.125404804189629	-0.0543526119675152	0.0160418416187737
chr12:102446823	IGF1	-	0.641024069699206	0.730902777777778	-0.089878708078572	-5.60276745117514	10.47240703931	0.000191412512547318	0.0271743241619429	-0.125404804189629	-0.0543526119675152	0.0160418416187737
chr12:105327321	C12orf75	-	0.609764727537608	0.707189530120806	-0.0974248025831984	-4.84169382264972	10.2402199007915	0.000635128016039129	0.0415459358299599	-0.142117367182344	-0.0527322379840527	0.0201220494628222
chr12:107469717	BTBD11	-	0.587980963136243	0.69757740393448	-0.109596440798237	-7.82232112686097	8.3198986574021	4.12882205122865e-05	0.0170078304034952	-0.141690283973374	-0.0775025976231012	0.0140107314722603
chr12:108998079	SVOP	+	0.593265691635257	0.673855380002306	-0.0805896883670497	-6.77072766900457	10.1504884509689	4.56844901452827e-05	0.0174623435903743	-0.107057273957938	-0.0541221027761616	0.0119026628018105
chr12:111785920	ALDH2	-	0.657716364137628	0.754770731749984	-0.0970543676123558	-5.08123934841007	10.9896050297144	0.000355339383380647	0.0331855123548084	-0.139099204107141	-0.055009531117571	0.0191005305905781
chr12:111785920	AC002996.1	-	0.657716364137628	0.754770731749984	-0.0970543676123558	-5.08123934841007	10.9896050297144	0.000355339383380647	0.0331855123548084	-0.139099204107141	-0.055009531117571	0.0191005305905781
chr12:11406342	PRB2	-	0.545827348750136	0.629750483541165	-0.0839231347910292	-7.54021747857021	9.92677983056512	2.05329046886803e-05	0.0140416940667341	-0.108747289151665	-0.0590989804303931	0.0111300682015531
chr12:11406342	AC078950.1	-	0.545827348750136	0.629750483541165	-0.0839231347910292	-7.54021747857021	9.92677983056512	2.05329046886803e-05	0.0140416940667341	-0.108747289151665	-0.0590989804303931	0.0111300682015531
chr12:11446920	PRB2	+	0.64119211787279	0.728561480463935	-0.0873693625911446	-8.25720657513023	10.6310996193059	6.02655245028596e-06	0.00976215324778098	-0.110756925021254	-0.0639818001610357	0.0105809830232771
chr12:11446920	AC078950.1	+	0.64119211787279	0.728561480463935	-0.0873693625911446	-8.25720657513023	10.6310996193059	6.02655245028596e-06	0.00976215324778098	-0.110756925021254	-0.0639818001610357	0.0105809830232771
chr12:115794522	AC009387.1	+	0.598188506171699	0.709899806076277	-0.111711299904577	-4.88797775220007	8.87216790252843	0.000898377782811572	0.0472409871655297	-0.163525086771889	-0.0598975130372653	0.0228542979464864
chr12:118802873	LINC02439	-	0.596253803404833	0.70459817959818	-0.108344376193346	-5.01479913535519	8.70108146013411	0.000802224687859037	0.0453587994885747	-0.157475263013722	-0.0592134893729707	0.0216049283867623
chr12:12112262	BCL2L14	+	0.634408899802988	0.751735768531434	-0.117326868728446	-7.02072405140751	9.72003197737186	4.19086308376018e-05	0.0170543233685647	-0.15470831292636	-0.0799454245305314	0.0167115055184264
chr12:12193161	LRP6	+	0.544146336695598	0.631125226860254	-0.0869788901646563	-5.08406768285933	10.9753743459915	0.000355205337004707	0.0331855123548084	-0.124643940574902	-0.0493138397544108	0.0171081298657571
chr12:12193161	BCL2L14	+	0.544146336695598	0.631125226860254	-0.0869788901646563	-5.08406768285933	10.9753743459915	0.000355205337004707	0.0331855123548084	-0.124643940574902	-0.0493138397544108	0.0171081298657571
chr12:126649983	AC006065.3	+	0.578921530977983	0.689977474936637	-0.111055943958654	-7.19085656426372	7.82251672116873	0.000104268529804388	0.0225686751828189	-0.146811127199615	-0.0753007607176925	0.0154440493933041
chr12:126649983	AC006065.4	+	0.578921530977983	0.689977474936637	-0.111055943958654	-7.19085656426372	7.82251672116873	0.000104268529804388	0.0225686751828189	-0.146811127199615	-0.0753007607176925	0.0154440493933041
chr12:130712987	RIMBP2	+	0.606500829997071	0.696243386243386	-0.0897425562463157	-5.07559874992649	9.758913345154	0.000518766030541453	0.0384957584949613	-0.129270994219708	-0.0502141182729231	0.0176811762843971
chr12:15410200	PTPRO	+	0.499267399267399	0.601350018564931	-0.102082619297532	-7.68138085484804	9.51452957817162	2.23325637489239e-05	0.0141893359179215	-0.131899815193569	-0.0722654234014944	0.0132896182635057
chr12:16694724	AC007529.2	+	0.611250654107797	0.700529100529101	-0.0892784464213036	-4.67810348337651	10.6831502144252	0.00072851487488719	0.0437688883559832	-0.131435258604506	-0.0471216342381016	0.0190843248206355
chr12:16694724	AC007529.1	+	0.611250654107797	0.700529100529101	-0.0892784464213036	-4.67810348337651	10.6831502144252	0.00072851487488719	0.0437688883559832	-0.131435258604506	-0.0471216342381016	0.0190843248206355
chr12:17114333	AC092110.1	+	0.654487180319802	0.823805319887409	-0.169318139567607	-39.1682705643606	9.05492044944194	2.03877469152534e-11	1.34306122511023e-05	-0.17908804770313	-0.159548231432084	0.00432283930661136
chr12:17550458	LINC02378	+	0.607657318526884	0.715490114174325	-0.107832795647441	-6.80313265394472	10.3705733016713	3.94601442191658e-05	0.0167636718037875	-0.142979510207733	-0.0726860810871491	0.015850462005164
chr12:17550458	AC048352.1	+	0.607657318526884	0.715490114174325	-0.107832795647441	-6.80313265394472	10.3705733016713	3.94601442191658e-05	0.0167636718037875	-0.142979510207733	-0.0726860810871491	0.015850462005164
chr12:18513766	PIK3C2G	-	0.567352252323124	0.652200948282187	-0.0848486959590629	-5.96521016047298	6.34266934563917	0.000811470966113424	0.0455420708365938	-0.119202621610366	-0.0504947703077594	0.0142239239987372
chr12:18725338	PLCZ1	+	0.585336356764928	0.695836208879687	-0.110499852114759	-6.6427874387285	8.35270170755657	0.000133240285710748	0.0243257461856413	-0.148579096942713	-0.0724206072868047	0.0166345608878778
chr12:18725338	AC087242.1	+	0.585336356764928	0.695836208879687	-0.110499852114759	-6.6427874387285	8.35270170755657	0.000133240285710748	0.0243257461856413	-0.148579096942713	-0.0724206072868047	0.0166345608878778
chr12:20842654	SLCO1B3-SLCO1B7	-	0.616270980481507	0.696372773209355	-0.080101792727848	-6.41504232162375	10.7567702746673	5.51345454133613e-05	0.0183834127129105	-0.107660529010653	-0.052543056445043	0.0124865571748205
chr12:20842654	SLCO1B3	-	0.616270980481507	0.696372773209355	-0.080101792727848	-6.41504232162375	10.7567702746673	5.51345454133613e-05	0.0183834127129105	-0.107660529010653	-0.052543056445043	0.0124865571748205
chr12:20910313	SLCO1B3-SLCO1B7	-	0.640070229048557	0.734223378960221	-0.0941531499116638	-4.72136025553213	10.905345675163	0.000643032361462967	0.0417491996190428	-0.138091620088343	-0.0502146797349845	0.019941954186051
chr12:20910313	SLCO1B3	-	0.640070229048557	0.734223378960221	-0.0941531499116638	-4.72136025553213	10.905345675163	0.000643032361462967	0.0417491996190428	-0.138091620088343	-0.0502146797349845	0.019941954186051
chr12:20988968	SLCO1B7	-	0.580337893960185	0.69374145178493	-0.113403557824745	-5.89551995327695	8.80635612208842	0.000250784828794576	0.0295825062966333	-0.1570636834095	-0.0697434322399902	0.0192355481320543
chr12:20988968	SLCO1B3-SLCO1B7	-	0.580337893960185	0.69374145178493	-0.113403557824745	-5.89551995327695	8.80635612208842	0.000250784828794576	0.0295825062966333	-0.1570636834095	-0.0697434322399902	0.0192355481320543
chr12:21000014	SLCO1B7	-	0.546884394783554	0.627258473368313	-0.0803740785847588	-5.14755670177231	10.5964645988187	0.000359940435155242	0.0333709852793022	-0.114900666428109	-0.0458474907414088	0.0156140249134285
chr12:21000014	SLCO1B3-SLCO1B7	-	0.546884394783554	0.627258473368313	-0.0803740785847588	-5.14755670177231	10.5964645988187	0.000359940435155242	0.0333709852793022	-0.114900666428109	-0.0458474907414088	0.0156140249134285
chr12:21000521	SLCO1B3-SLCO1B7	-	0.60849499536681	0.692928580646351	-0.0844335852795405	-5.65477092183099	7.56983190593145	0.000583894113361173	0.0403185654944841	-0.119209002989961	-0.0496581675691195	0.0149313891661948
chr12:21000521	SLCO1B7	-	0.60849499536681	0.692928580646351	-0.0844335852795405	-5.65477092183099	7.56983190593145	0.000583894113361173	0.0403185654944841	-0.119209002989961	-0.0496581675691195	0.0149313891661948
chr12:21303637	SLCO1A2	+	0.57730364873222	0.68223988145983	-0.10493623272761	-6.92212683168383	8.43840233100692	9.43348647582585e-05	0.021746482291308	-0.139580564474103	-0.0702919009811176	0.015159536263811
chr12:21534805	SPX	+	0.613502928588436	0.699016009290365	-0.0855130807019291	-5.72916712881443	7.81220416098919	0.000479406508715439	0.037188721714204	-0.120076862800197	-0.0509492986036612	0.0149259183366893
chr12:24411139	SOX5	-	0.671974052779006	0.787601356332006	-0.115627303553	-6.81198759941018	7.26393410218854	0.000212046465398025	0.0280228918146252	-0.155470895652272	-0.0757837114537282	0.016974091902782
chr12:28300057	CCDC91	-	0.561205013521947	0.642413019079686	-0.0812080055577385	-5.47726886217243	9.80167768567241	0.000290097954965897	0.0310405711406324	-0.114334040469919	-0.0480819706455583	0.0148263683235607
chr12:31984949	RESF1	+	0.644055349412492	0.743284493284493	-0.099229143872001	-6.89159498982502	10.9985872757007	2.61810481776143e-05	0.0148501238477414	-0.130920689312789	-0.0675375984312127	0.0143985744981396
chr12:3386402	PRMT8	-	0.625787224471435	0.707020308123249	-0.0812330836518144	-9.60504979576591	9.44599147580912	3.51282567750547e-06	0.00849411457417544	-0.100228080399259	-0.0622380869043699	0.00845733081858914
chr12:3528633	PRMT8	-	0.618001171114088	0.702396322551361	-0.0843951514372729	-4.64184830613823	10.0760971257715	0.000901107229676556	0.0472700177125331	-0.124864331227029	-0.0439259716475174	0.018181367824035
chr12:38551829	AC087897.2	-	0.547817053456151	0.633987027465288	-0.0861699740091372	-6.18155086285441	10.9150038845885	7.12881770564744e-05	0.0199556037787579	-0.116880581063531	-0.0554593669547436	0.0139398632998301
chr12:40348900	LRRK2	-	0.516295146077755	0.722395282186949	-0.206100136109194	-4.91427620460102	8.82910205979553	0.000879144220958515	0.0468621826472689	-0.30125355468168	-0.110946717536708	0.0419390623417202
chr12:40730974	CNTN1	+	0.578013581319052	0.659452183497861	-0.081438602178809	-6.10905204965365	9.8563544026585	0.000121476265302889	0.0235298185155931	-0.111200276132272	-0.0516769282253461	0.0133308083671388
chr12:42638568	LINC02402	-	0.567191171401698	0.477638568868408	0.0895526025332902	6.06069081977349	10.8427002538778	8.69362717438284e-05	0.0210086562027248	0.056973249702294	0.122131955364286	0.0147759727721331
chr12:4716743	GAU1	-	0.594149396078139	0.682230392156863	-0.088080996078724	-7.52647332702891	10.853177427589	1.25482073177927e-05	0.012370415290157	-0.113881316266174	-0.0622806758912739	0.0117028244506507
chr12:4716743	AC005833.1	-	0.594149396078139	0.682230392156863	-0.088080996078724	-7.52647332702891	10.853177427589	1.25482073177927e-05	0.012370415290157	-0.113881316266174	-0.0622806758912739	0.0117028244506507
chr12:48742135	TEX49	-	0.601298176275341	0.735016835016835	-0.133718658741494	-7.24814267509291	10.978208964686	1.66606268349348e-05	0.0135754288876088	-0.17433376352389	-0.0931035539590975	0.0184486791631457
chr12:488076	B4GALNT3	+	0.611641053182407	0.705560053981107	-0.0939190007987001	-4.72132745048911	10.3475789541595	0.000742143672909902	0.0440736029821393	-0.13804126750009	-0.0497967340973099	0.0198924988329226
chr12:511679	B4GALNT3	-	0.636608342054771	0.753208408279305	-0.116600066224534	-6.49569988567229	10.6006187660062	5.29302355631299e-05	0.0182845633808304	-0.156290879834281	-0.0769092526147868	0.0179503468874419
chr12:64050354	SRGAP1	-	0.648677554692592	0.746432579765913	-0.0977550250733208	-6.30658570926504	10.5694040843628	6.91213830505787e-05	0.0197787782355617	-0.132041667816497	-0.0634683823301443	0.015500467222654
chr12:64050354	AC020611.2	-	0.648677554692592	0.746432579765913	-0.0977550250733208	-6.30658570926504	10.5694040843628	6.91213830505787e-05	0.0197787782355617	-0.132041667816497	-0.0634683823301443	0.015500467222654
chr12:65336390	MSRB3	+	0.634704851840402	0.71795230912878	-0.083247457288378	-6.8241983101488	8.26677672152538	0.00011530498514418	0.0232335954148904	-0.111220850283981	-0.0552740642927748	0.0121988625630317
chr12:65397684	MSRB3	-	0.497446402803546	0.683555479608111	-0.186109076804566	-5.05711941220522	10.118411565928	0.000476412579094705	0.0371127852315271	-0.267977821195797	-0.104240332413334	0.0368014004880716
chr12:65839328	HMGA2	-	0.572222222222222	0.661381796308267	-0.0891595740860447	-4.75000781594017	10.9113600363867	0.000613208696040148	0.0410051839822192	-0.130513942656579	-0.0478052055155102	0.0187704057637213
chr12:66635832	GRIP1	+	0.663700984115731	0.764548107890499	-0.100847123774769	-5.2753126251237	9.95484056158809	0.000365509093547111	0.0336069068280403	-0.14346822654737	-0.0582260210021668	0.0191168051907452
chr12:66635956	GRIP1	+	0.649038461538462	0.73474484823169	-0.0857063866932287	-5.47571112158784	10.9465839971089	0.000196557000093872	0.0274369756347874	-0.12017695103809	-0.0512358223483679	0.01565210157916
chr12:66735434	GRIP1	+	0.56216501752216	0.688840756467624	-0.126675738945464	-6.21137917513427	5.75331756181513	0.000942383351716147	0.0480163677080095	-0.177101678479722	-0.0762497994112055	0.0203941403951926
chr12:66735455	GRIP1	+	0.543895452918009	0.653373015873016	-0.109477562955007	-6.70317737446298	10.3677173285858	4.48769041468094e-05	0.0174418519155702	-0.145693755851126	-0.0732613700588867	0.0163321894736192
chr12:67031395	GRIP1	-	0.378704128485872	0.460292899948072	-0.0815887714622005	-6.49653749383703	8.00620074322976	0.000188152625015906	0.0270575548122542	-0.110545532462865	-0.0526320104615363	0.0125588086791772
chr12:67031395	AC073530.1	-	0.378704128485872	0.460292899948072	-0.0815887714622005	-6.49653749383703	8.00620074322976	0.000188152625015906	0.0270575548122542	-0.110545532462865	-0.0526320104615363	0.0125588086791772
chr12:7052533	C1S	-	0.622185797395881	0.728804256745433	-0.106618459349552	-5.31294037428365	9.25171355797751	0.000442787785791013	0.035979566930751	-0.15182715758032	-0.0614097611187836	0.0200676935629881
chr12:7081556	C1R	-	0.632899556583767	0.713719504895975	-0.0808199483122084	-7.28822313923906	9.60750875817459	3.27060149200094e-05	0.0159712863931355	-0.105665544436665	-0.0559743521877523	0.011089115518031
chr12:71178950	TSPAN8	+	0.602671451355662	0.699259962049336	-0.0965885106936739	-5.85011482428131	10.4092737902781	0.000137966092253966	0.0246029071285386	-0.133181147690756	-0.059995873696592	0.0165105324587436
chr12:71229548	TSPAN8	+	0.587334897613582	0.701062003298845	-0.113727105685264	-6.38877089062303	10.6665311325204	5.93669695211974e-05	0.0188458115741808	-0.153057010847792	-0.0743972005227348	0.0178010931417472
chr12:71405633	TSPAN8	+	0.635015839972905	0.718340780158934	-0.0833249401860289	-5.32836992270982	7.65307229555524	0.000814542438814099	0.045598544530947	-0.11967272270423	-0.0469771576678278	0.0156379796062757
chr12:72438423	TRHDE	-	0.560238765569982	0.667919799498747	-0.107681033928765	-5.10688644874618	9.66880570644127	0.000510642663421493	0.038202643745062	-0.15488141330012	-0.0604806545574107	0.021085456864858
chr12:75982292	AC078923.1	+	0.584670008354219	0.695624266800737	-0.110954258446519	-5.79009015040843	10.99789142347	0.000121124377409406	0.0235298185155931	-0.153132252661268	-0.0687762642317691	0.0191627859954291
chr12:77450914	NAV3	+	0.599783979248265	0.701981140839836	-0.102197161591571	-6.04252500599629	9.0960140044967	0.000184117494630579	0.0268519703597734	-0.140395528182	-0.0639987950011425	0.0169129894357336
chr12:79044273	SYT1	-	0.593158289586861	0.512609181735242	0.0805491078516193	5.04191395306128	10.6723051810793	0.000413578276330958	0.0350964124482158	0.045254214294677	0.115844001408562	0.0159758989545453
chr12:79044273	AC090709.1	-	0.593158289586861	0.512609181735242	0.0805491078516193	5.04191395306128	10.6723051810793	0.000413578276330958	0.0350964124482158	0.045254214294677	0.115844001408562	0.0159758989545453
chr12:79044583	AC090709.1	-	0.633130524937248	0.719333932042497	-0.0862034071052495	-5.31324570638453	7.53523430315474	0.000872068580660603	0.0467387295241109	-0.124022088358046	-0.0483847258524536	0.016224246321164
chr12:79044583	SYT1	-	0.633130524937248	0.719333932042497	-0.0862034071052495	-5.31324570638453	7.53523430315474	0.000872068580660603	0.0467387295241109	-0.124022088358046	-0.0483847258524536	0.016224246321164
chr12:8156109	AC092111.3	+	0.654892826695896	0.751277291976022	-0.0963844652801258	-5.21398303423118	10.9901921715869	0.000289015892864643	0.0310248220161287	-0.137075790241093	-0.0556931403191586	0.0184857650374649
chr12:81732807	PPFIA2	+	0.639572367408502	0.764819764671696	-0.125247397263194	-6.51881197575238	10.6917630425962	4.93140312678576e-05	0.0178916958412753	-0.167684638159665	-0.0828101563667244	0.019213224392584
chr12:82243588	CCDC59	-	0.613431143208271	0.711456894237215	-0.0980257510289432	-5.16709691234646	10.9965679019889	0.000310207730327566	0.0317892790542499	-0.139782552364438	-0.0562689496934484	0.0189711462145633
chr12:82936009	TMTC2	+	0.656212484993998	0.7618666421298	-0.105654157135802	-8.0374765502949	7.92384867986227	4.45755861994274e-05	0.0173779523579188	-0.136017802709672	-0.0752905115619329	0.01314519009476
chr12:84234901	AC090679.2	-	0.586853890211422	0.680417483750817	-0.0935635935393951	-4.84114194710244	9.11685846640403	0.000886285039613394	0.0469875049031615	-0.137198488762932	-0.0499286983158579	0.0193267610331888
chr12:85105411	LRRIQ1	-	0.613583506274536	0.694372358165462	-0.0807888518909254	-10.8864576079314	10.9175234168651	3.36326629881943e-07	0.00399705708189992	-0.0971375210013256	-0.0644401827805252	0.00742104133414952
chr12:90635377	AC112481.2	+	0.521454339720594	0.630768208399787	-0.109313868679194	-6.24476619142098	9.46320836226259	0.000121470697905276	0.0235298185155931	-0.148619148294125	-0.0700085890642623	0.0175048777373552
chr12:90635377	LINC02822	+	0.521454339720594	0.630768208399787	-0.109313868679194	-6.24476619142098	9.46320836226259	0.000121470697905276	0.0235298185155931	-0.148619148294125	-0.0700085890642623	0.0175048777373552
chr12:91998365	LINC01619	+	0.603228359348199	0.685479558755421	-0.0822511994072221	-7.33534268501773	7.03306236425326	0.00015430753577264	0.0253689347313787	-0.108740484959669	-0.0557619138547751	0.0112130002563095
chr12:97052608	AC007656.1	-	0.564835083458671	0.651340612002377	-0.0865055285437059	-4.75287939026563	10.2877181682225	0.000718202936522513	0.0434750904274739	-0.126905909604638	-0.046105147482774	0.0182006572102119
chr12:97052608	AC007656.2	-	0.564835083458671	0.651340612002377	-0.0865055285437059	-4.75287939026563	10.2877181682225	0.000718202936522513	0.0434750904274739	-0.126905909604638	-0.046105147482774	0.0182006572102119
chr12:9864107	CLEC2B	+	0.619470248533716	0.736083540115798	-0.116613291582082	-5.71097109079736	10.9468806948485	0.000138505776673364	0.0246430972574153	-0.161582204027912	-0.0716443791362519	0.0204191703526555
chr12:99620635	ANKS1B	+	0.576757651776406	0.663942700431789	-0.0871850486553826	-8.17169043642232	10.8844521045262	5.70998381102209e-06	0.00969589840442519	-0.110698155615684	-0.0636719416950807	0.010669157053085
chr13:102064619	FGF14	+	0.580704535995367	0.663810378788858	-0.0831058427934911	-6.61452706118139	10.9270613393481	3.91167629238325e-05	0.0167349079731407	-0.110781865674217	-0.0554298199127654	0.0125641398129903
chr13:105768101	LINC00343	+	0.54743932926706	0.640357382269147	-0.0929180530020867	-5.64976192576318	8.01204032745501	0.000478952987032029	0.0371750598021572	-0.130833523044197	-0.0550025829599763	0.0164463660987866
chr13:106054702	AL138701.2	+	0.587733700767757	0.710690933331935	-0.122957232564178	-7.46556584646088	9.22616900924462	3.34608634668266e-05	0.0161232981363424	-0.160076008369839	-0.0858384567585176	0.0164699146846943
chr13:109759094	IRS2	+	0.612833819044999	0.711360499403978	-0.0985266803589785	-5.33716815123115	10.8291006470507	0.000251489353721585	0.0296313803496546	-0.139236290720545	-0.0578170699974117	0.0184604789594742
chr13:110655063	CARS2	+	0.657325118492648	0.878256774090107	-0.220931655597459	-7.12655397156263	8.26106873853448	8.47541415086384e-05	0.020931907331792	-0.292029184834006	-0.149834126360913	0.0310011902637728
chr13:111663246	AL359649.1	-	0.513144474573046	0.379788753284177	0.133355721288869	5.8175952906205	7.53021726277906	0.000497937816934734	0.0378157806822156	0.0799160337162105	0.186795408861528	0.0229228254333666
chr13:18936293	AL355516.1	-	0.512741657927993	0.601373626373626	-0.0886319684456331	-5.76730845087111	9.82839615682214	0.000193262468198239	0.0272636468906566	-0.12295520867584	-0.0543087282154266	0.0153679951749842
chr13:19288333	ANKRD26P3	+	0.522317699009428	0.629497354497355	-0.107179655487926	-4.86298640607165	10.3004445570732	0.000604585373785518	0.0408089344012956	-0.156094109933764	-0.058265201042088	0.0220398838364236
chr13:23193681	SGCG	+	0.635283763855192	0.722725442834139	-0.0874416789789461	-5.68146021554244	8.58479377663689	0.000358673391393067	0.0333363037371243	-0.122516257104831	-0.0523671008530612	0.0153907051464933
chr13:23786471	MIPEP	+	0.478481288519745	0.630023588382722	-0.151542299862977	-5.42665982616216	10.8496174703387	0.000218339307683178	0.0282865642706783	-0.213110056029273	-0.0899745436966811	0.0279255204338376
chr13:30291227	KATNAL1	+	0.461903384835716	0.673756798756799	-0.211853413921083	-4.76387241088274	10.084071796729	0.000746498418030111	0.0441612517778905	-0.31082876080588	-0.112878067036286	0.0444708412922896
chr13:34565139	LINC00457	+	0.533059922533607	0.658239962651727	-0.125180040118121	-5.16450823803007	7.87343379164506	0.000903070158260201	0.0473325344368965	-0.181230952725111	-0.0691291275111306	0.024238520755244
chr13:34565139	AL161716.1	+	0.533059922533607	0.658239962651727	-0.125180040118121	-5.16450823803007	7.87343379164506	0.000903070158260201	0.0473325344368965	-0.181230952725111	-0.0691291275111306	0.024238520755244
chr13:34565139	LINC02343	+	0.533059922533607	0.658239962651727	-0.125180040118121	-5.16450823803007	7.87343379164506	0.000903070158260201	0.0473325344368965	-0.181230952725111	-0.0691291275111306	0.024238520755244
chr13:35040755	NBEA	-	0.62986737867764	0.722491113404426	-0.0926237347267864	-6.578256814959	9.96819740848799	6.34046989623701e-05	0.0193266257652853	-0.124010138746996	-0.0612373307065765	0.014080285603347
chr13:35126684	NBEA	+	0.641674699644545	0.762769791340374	-0.121095091695829	-5.85992024724216	7.6109519906825	0.000457004527745424	0.0364429121875353	-0.169175953401611	-0.0730142299900476	0.0206649726594521
chr13:35126701	NBEA	+	0.612073744999763	0.710155744638503	-0.0980819996387401	-7.2046645749646	10.9867075952553	1.75363599574829e-05	0.0136666101194708	-0.128049931311786	-0.0681140679656943	0.013613680223166
chr13:35261388	NBEA	+	0.631271902700474	0.735482654600302	-0.104210751899828	-4.58814925398197	10.1767735317113	0.000953727085025436	0.0482384395654745	-0.15469962272835	-0.0537218810713053	0.0227130256953575
chr13:35513211	NBEA	-	0.603450620014088	0.693625356125356	-0.0901747361112686	-6.52530305444485	8.42431563722385	0.000145670768336689	0.0249218290392129	-0.121764726095512	-0.0585847461270248	0.0138192410925412
chr13:36179010	CCDC169-SOHLH2	-	0.605697819427797	0.689953000928611	-0.0842551815008141	-6.56576494921346	9.98529166122279	6.3893380436803e-05	0.0193416583030989	-0.112853484176269	-0.0556568788253591	0.0128325004249364
chr13:36179010	SOHLH2	-	0.605697819427797	0.689953000928611	-0.0842551815008141	-6.56576494921346	9.98529166122279	6.3893380436803e-05	0.0193416583030989	-0.112853484176269	-0.0556568788253591	0.0128325004249364
chr13:37796890	TRPC4	+	0.58542564151265	0.673635107317119	-0.088209465804469	-6.07470111310133	6.85983818081736	0.000544420152518797	0.039292828165645	-0.122688413750939	-0.0537305178579987	0.0145207910911415
chr13:39129965	AL354809.1	-	0.630284872657428	0.714470831195211	-0.0841859585377829	-6.71116251441208	9.51320497618932	6.72156384176038e-05	0.0195635972146772	-0.112331192343201	-0.056040724732365	0.0125441692638191
chr13:39223428	LHFPL6	+	0.654717231720274	0.765150973264563	-0.110433741544289	-6.69902461771817	6.31987960445806	0.00043156684088294	0.0356036530697328	-0.150281424559253	-0.0705860585293256	0.0164850478758063
chr13:39509366	LHFPL6	-	0.612148759742646	0.693255912286305	-0.0811071525436594	-5.23134812124436	8.67595146514142	0.000609323828420494	0.0409461746992447	-0.116380485750304	-0.0458338193370151	0.015504063324382
chr13:41340430	NAA16	-	0.610819327731092	0.520891726319496	0.0899276014115962	5.13118949578576	10.9782427797949	0.000329768689894296	0.0323504028651762	0.051344503719957	0.128510699103235	0.0175256831745258
chr13:43626955	AL161714.1	-	0.623577793690576	0.722408963585434	-0.0988311698948585	-7.74713392416022	8.63146784191088	3.61623048708128e-05	0.016565558343121	-0.12787871698641	-0.0697836228033066	0.0127571268113287
chr13:43626955	ENOX1	-	0.623577793690576	0.722408963585434	-0.0988311698948585	-7.74713392416022	8.63146784191088	3.61623048708128e-05	0.016565558343121	-0.12787871698641	-0.0697836228033066	0.0127571268113287
chr13:44457798	TSC22D1	+	0.538437458598749	0.437240537240537	0.101196921358212	7.42172487232106	6.2607935579194	0.000251920935673559	0.0296421926703371	0.0681667266904337	0.13422711602599	0.0136352294243108
chr13:44457798	AL139184.1	+	0.538437458598749	0.437240537240537	0.101196921358212	7.42172487232106	6.2607935579194	0.000251920935673559	0.0296421926703371	0.0681667266904337	0.13422711602599	0.0136352294243108
chr13:46076558	CPB2-AS1	+	0.398849660382841	0.569318977591036	-0.170469317208195	-8.48261654466991	10.5507366991886	4.92969120570539e-06	0.00940152068631871	-0.214931884352076	-0.126006750064314	0.020096313007961
chr13:46076558	CPB2	+	0.398849660382841	0.569318977591036	-0.170469317208195	-8.48261654466991	10.5507366991886	4.92969120570539e-06	0.00940152068631871	-0.214931884352076	-0.126006750064314	0.020096313007961
chr13:46107631	CPB2-AS1	-	0.528199174406605	0.800159587001692	-0.271960412595087	-7.24821376172601	10.8297592864366	1.7949396457434e-05	0.0136666101194708	-0.354702295754562	-0.189218529435613	0.0375210253912718
chr13:46111978	CPB2-AS1	+	0.623896313709556	0.723512013180878	-0.099615699471322	-5.84632097959627	7.90145457925132	0.000402826700040697	0.0347290885962002	-0.13899325943826	-0.0602381395043843	0.0170390404185781
chr13:50055449	DLEU2	-	0.648941024706713	0.73607310101563	-0.0871320763089164	-6.28782016762962	10.2863496643721	7.99324020697852e-05	0.0206090607906728	-0.117891906360031	-0.0563722462578019	0.0138572786730578
chr13:51653367	WDFY2	-	0.622979191676671	0.76381048145754	-0.14083128978087	-6.68292964755675	10.6964553364667	3.95914725245807e-05	0.0167689848228586	-0.187374375206701	-0.0942882043550376	0.021073286299274
chr13:52563224	AL137058.1	-	0.57396290022523	0.705102587011816	-0.131139686786587	-5.79601703997956	10.8799181267169	0.000125249844308606	0.0237397853940347	-0.181005940161879	-0.0812734334112948	0.0226258283717967
chr13:53762878	AL356295.1	+	0.610537570320179	0.712420252381889	-0.10188268206171	-9.7112594879615	8.96241570824419	4.70555314848714e-06	0.00914711569127472	-0.12563058553809	-0.0781347785853306	0.0104911914039583
chr13:65902561	LINC01052	-	0.599901883830455	0.718020461507304	-0.118118577676848	-9.19629773905792	9.84827656118975	3.80136806159755e-06	0.00849621316469715	-0.146796991245486	-0.0894401641082106	0.0128441445708291
chr13:67213264	PCDH9	+	0.626392631784579	0.708524083033887	-0.0821314512493082	-4.95366787597895	10.4230723769442	0.000508544109918892	0.038131489203795	-0.118871581964884	-0.0453913205337326	0.0165799268957
chr13:71802787	DACH1	+	0.531768707482993	0.614082798293325	-0.0823140908103314	-6.36631119398444	10.6350382022531	6.20197753933203e-05	0.0192197295606788	-0.110891634022576	-0.0537365475980863	0.0129296366926126
chr13:73584176	LINC00392	+	0.59129400011753	0.719287518037518	-0.127993517919988	-5.6500527174041	9.20491531791701	0.000288668033410592	0.0310248220161287	-0.179065940952833	-0.0769210948871436	0.0226535086169594
chr13:73584176	LINC00393	+	0.59129400011753	0.719287518037518	-0.127993517919988	-5.6500527174041	9.20491531791701	0.000288668033410592	0.0310248220161287	-0.179065940952833	-0.0769210948871436	0.0226535086169594
chr13:77146546	MYCBP2	+	0.660294929937787	0.752014664886265	-0.0917197349484781	-8.57278049685702	8.18831039605024	2.2942830988531e-05	0.0142888477886956	-0.116293140185461	-0.067146329711495	0.0106989482562985
chr13:78433118	OBI1-AS1	-	0.548487227058656	0.646473055082895	-0.0979858280242393	-5.04375559543966	10.8458728746433	0.00039242523356757	0.0344683088811778	-0.140818962532324	-0.0551526935161542	0.0194271562469906
chr13:78559172	OBI1-AS1	-	0.532008592910849	0.649698340874811	-0.117689747963963	-4.7383096120168	10.4788212960913	0.000698252787011709	0.043085323312065	-0.172691208419458	-0.0626882875084677	0.0248379184985064
chr13:84270263	AL162493.1	-	0.4676648400516	0.565107664543755	-0.0974428244921551	-6.40522189198514	9.0833178368117	0.000119538733903089	0.0234764025877279	-0.131809027227618	-0.0630766217566925	0.015213028703047
chr13:85454028	LINC00351	-	0.635368991820605	0.725370246084984	-0.0900012542643789	-5.22482563911543	7.45200532951023	0.00100058017707687	0.0491434811200416	-0.130238018926877	-0.0497644896018812	0.0172256952635105
chr13:85513030	LINC00351	-	0.592673992673993	0.676146076146076	-0.0834720834720835	-5.70102046815105	10.1042005082773	0.000190430902509754	0.0271587769272678	-0.116050064403902	-0.0508941025402648	0.0146416038915144
chr13:89192286	LINC00440	-	0.507762079190651	0.399264010929715	0.108498068260936	6.03664469673886	10.2361161216278	0.000114252318631407	0.0231523748760574	0.0685760541309166	0.148420082390955	0.0179732407175709
chr13:89216567	LINC00440	-	0.45846136077521	0.538823893007057	-0.0803625322318469	-5.40587844611874	10.696975803095	0.000236637698552449	0.0290426390955724	-0.113195306487508	-0.047529757976186	0.0148657675219362
chr13:89216567	LINC01047	-	0.45846136077521	0.538823893007057	-0.0803625322318469	-5.40587844611874	10.696975803095	0.000236637698552449	0.0290426390955724	-0.113195306487508	-0.047529757976186	0.0148657675219362
chr13:89494148	LINC01040	-	0.638001957734762	0.723545949205178	-0.0855439914704168	-6.81529781427059	8.15898115891516	0.000123776546297594	0.0236918010111399	-0.114390527489361	-0.0566974554514723	0.0125517613172084
chr13:89494148	LINC02336	-	0.638001957734762	0.723545949205178	-0.0855439914704168	-6.81529781427059	8.15898115891516	0.000123776546297594	0.0236918010111399	-0.114390527489361	-0.0566974554514723	0.0125517613172084
chr13:89497190	LINC01040	+	0.514430014430014	0.60720695970696	-0.0927769452769452	-6.24271950443909	10.1166107947308	9.12430623086666e-05	0.0215116265526816	-0.125839040597053	-0.0597148499568373	0.0148616232414372
chr13:89497190	LINC02336	+	0.514430014430014	0.60720695970696	-0.0927769452769452	-6.24271950443909	10.1166107947308	9.12430623086666e-05	0.0215116265526816	-0.125839040597053	-0.0597148499568373	0.0148616232414372
chr13:91471835	GPC5	-	0.4795430133776	0.559743107769424	-0.0802000943918237	-4.45772720734993	10.9835648912215	0.000969809651374139	0.0485951015923518	-0.119805803867523	-0.0405943849161243	0.0179912521922807
chr13:91493602	GPC5	-	0.670293835237444	0.757271940115077	-0.0869781048776331	-5.09238025139619	9.99990306484385	0.000469232618184809	0.0368798127125014	-0.12503487594074	-0.0489213338145263	0.0170800491290465
chr13:92140281	GPC5	+	0.616326847755419	0.707272365161505	-0.090945517406086	-4.91569206993026	10.8613713508722	0.000477462497617805	0.0371296285548314	-0.131729578239206	-0.0501614565729662	0.0185010607076892
chr13:95579621	CLDN10	+	0.627020202020202	0.717810941495152	-0.09079073947495	-5.55793147922212	10.9999341408358	0.000170721140954091	0.0262216475291227	-0.12674462213368	-0.0548368568162199	0.0163353470287217
chr13:95579621	DZIP1	+	0.627020202020202	0.717810941495152	-0.09079073947495	-5.55793147922212	10.9999341408358	0.000170721140954091	0.0262216475291227	-0.12674462213368	-0.0548368568162199	0.0163353470287217
chr13:96463284	HS6ST3	+	0.595824390362205	0.683373205741627	-0.0875488153794213	-5.80814566170324	10.4286687141427	0.000145252871093361	0.0248835906030502	-0.120948370893546	-0.0541492598652965	0.015073453814474
chr14:18334920	CR383658.1	+	0.620268869008365	0.703018097835869	-0.0827492288275044	-5.58444446874373	7.22249383197701	0.000744061838069729	0.0440908591294522	-0.117570150013639	-0.0479283076413694	0.0148178085198364
chr14:19767301	OR4N2	-	0.52847389968133	0.425746491833448	0.102727407847882	5.87283720556823	9.18015617081343	0.000219307626388449	0.0282967177691536	0.0632759106742872	0.142178905021476	0.0174919556344048
chr14:24286302	AL096870.10	-	0.338267059983115	0.149439799331104	0.188827260652011	4.71093017545882	10.7362520536275	0.000682254023342703	0.0426848003966187	0.100340476557888	0.277314044746135	0.0400827975833075
chr14:25720327	LINC02306	-	0.594320979652196	0.69067887109077	-0.0963578914385748	-7.39308846762733	10.8463720124456	1.48485759407747e-05	0.0129714023747055	-0.125094104313822	-0.0676216785633272	0.0130335098599867
chr14:26892701	AL110292.1	-	0.535798470535313	0.616601498859563	-0.0808030283242508	-6.08079340658093	10.9131460123885	8.22267999632813e-05	0.0207985933789205	-0.11007866664291	-0.0515273900055912	0.0132882377218739
chr14:26892701	MIR4307HG	-	0.535798470535313	0.616601498859563	-0.0808030283242508	-6.08079340658093	10.9131460123885	8.22267999632813e-05	0.0207985933789205	-0.11007866664291	-0.0515273900055912	0.0132882377218739
chr14:27066481	AL110292.1	-	0.52728586745556	0.379503633075062	0.147782234380498	18.7123142267142	8.7307829108085	2.38809815359077e-08	0.00103092497475019	0.129832309420694	0.165732159340303	0.00789759260078696
chr14:27380073	AL390334.1	+	0.555324543610548	0.639816791777576	-0.0844922481670285	-6.8543226238505	10.4217926821346	3.60855290252447e-05	0.016565558343121	-0.11180826136677	-0.0571762349672866	0.0123268560299492
chr14:27631711	AL390334.1	+	0.53946994297551	0.643722816136609	-0.104252873161099	-6.62042201516932	9.4151667890179	7.8643527236744e-05	0.0205463039342162	-0.139637420217498	-0.0688683261047006	0.0157471642928843
chr14:27631711	LINC00645	+	0.53946994297551	0.643722816136609	-0.104252873161099	-6.62042201516932	9.4151667890179	7.8643527236744e-05	0.0205463039342162	-0.139637420217498	-0.0688683261047006	0.0157471642928843
chr14:28406106	AL139023.1	+	0.608290211430605	0.699862205159319	-0.0915719937287134	-5.79571851508	10.7717035296352	0.000130293616022473	0.0241565254182916	-0.126437557431364	-0.0567064300260631	0.0157999380905836
chr14:30765796	AL121852.1	+	0.661698717948718	0.78769387638897	-0.125995158440253	-6.52788462538557	6.25855289200483	0.000519475656077583	0.0385111741632356	-0.172754236020075	-0.0792360808604305	0.0193010700511286
chr14:31540097	NUBPL	-	0.625236668093811	0.722886957813428	-0.0976502897196174	-7.49035933749078	10.93457041864	1.25682566621493e-05	0.012370415290157	-0.126365047047989	-0.0689355323912463	0.0130367964098675
chr14:35948159	AL133304.3	+	0.551150694195807	0.631868582526477	-0.0807178883306703	-6.5385773556392	9.76825244756533	7.32085657978723e-05	0.020154246789382	-0.108312685106499	-0.0531230915548413	0.0123448701361704
chr14:35948159	AL133304.1	+	0.551150694195807	0.631868582526477	-0.0807178883306703	-6.5385773556392	9.76825244756533	7.32085657978723e-05	0.020154246789382	-0.108312685106499	-0.0531230915548413	0.0123448701361704
chr14:37218051	MIPOL1	-	0.420436805258234	0.502593108941571	-0.0821563036833372	-6.55352467764653	9.04053189192999	0.000102619081604691	0.0224392983105442	-0.110495791694478	-0.0538168156721963	0.0125362011626453
chr14:37860725	TTC6	+	0.663150545530408	0.749525691699605	-0.0863751461691965	-5.14886761570988	9.54314226799225	0.0005015314448611	0.0378946505080375	-0.123997403984041	-0.0487528883543524	0.0167755616605202
chr14:39945094	AL049828.1	-	0.638448106515333	0.747740563530037	-0.109292457014704	-6.35553838661625	5.51982671364562	0.000982758660353467	0.0488100838273173	-0.152273984933897	-0.066310929095511	0.0171964120687016
chr14:40762647	AL390800.1	-	0.653853541416567	0.754605739088498	-0.100752197671931	-8.16390479361395	6.61872307065107	0.000108501147474916	0.022799942584414	-0.130278711115627	-0.0712256842282351	0.0123411774413076
chr14:42262524	AL445074.1	-	0.641165940060235	0.466228070175439	0.174937869884796	4.52338168170326	10.8887597773524	0.000889631469820287	0.0470842210544938	0.0897104572810967	0.260165282488495	0.038674134131198
chr14:46189572	LINC00871	+	0.558878925307497	0.644137043775327	-0.0852581184678298	-6.26836152944683	8.17368263349123	0.000220178217633399	0.0283477006024096	-0.116507235326523	-0.0540090016091367	0.0136013403290977
chr14:47081027	MDGA2	-	0.626016272100238	0.726772085938753	-0.100755813838515	-6.50928644778645	8.40134027385144	0.000150066919086308	0.0251630066002177	-0.136155308482303	-0.0653563191947269	0.015478780146905
chr14:47360207	MDGA2	+	0.618538452757152	0.70043624255367	-0.0818977897965181	-6.67817940039791	10.4042522314546	4.55571908124713e-05	0.0174523356439402	-0.109079320307844	-0.0547162592851921	0.0122634905243244
chr14:52869899	FERMT2	+	0.639122914122914	0.771558302808303	-0.132435388685389	-9.81167765398128	7.23419600215141	1.94872775989794e-05	0.0138141844352183	-0.164144179568399	-0.100726597802378	0.0134977313111841
chr14:52869899	AL139317.5	+	0.639122914122914	0.771558302808303	-0.132435388685389	-9.81167765398128	7.23419600215141	1.94872775989794e-05	0.0138141844352183	-0.164144179568399	-0.100726597802378	0.0134977313111841
chr14:57944986	SLC35F4	+	0.643741831188342	0.748363170854776	-0.104621339666434	-5.41770352923026	10.4029217987466	0.000256231406205418	0.0298809343256319	-0.147424127241614	-0.0618185520912547	0.0193110123324335
chr14:57950353	SLC35F4	-	0.488231228259726	0.65175931834761	-0.163528090087884	-5.13813924531249	10.9921905208731	0.000324906837094266	0.0322455184237711	-0.233583431717195	-0.0934727484585717	0.0318263251111907
chr14:58858140	LINC01500	-	0.607981255930172	0.710063661828368	-0.102082405898195	-5.55025834124312	9.24816769744895	0.000323271835067908	0.0322241338945997	-0.143519267238309	-0.0606455445580814	0.0183923701604368
chr14:59011282	LINC01500	+	0.615244503598541	0.695303903669963	-0.0800594000714216	-5.67865690355917	6.97666177296782	0.000760709838569363	0.0444442491750052	-0.11341919884011	-0.046699601302733	0.0140982984940054
chr14:59666503	RTN1	+	0.571321999279266	0.661956873917658	-0.0906348746383926	-7.26506704883549	10.3533527897233	2.24640606828887e-05	0.0142037880465683	-0.118303818122552	-0.0629659311542337	0.0124754353991709
chr14:61201769	PRKCH	+	0.62824349835628	0.718216417001583	-0.089972918645303	-5.75760052333917	10.1566818644535	0.000172645400837549	0.026310689443378	-0.124718946948464	-0.0552268903421418	0.0156268081261606
chr14:63086680	KCNH5	+	0.651315789473684	0.813194700036805	-0.161878910563121	-7.45763408263955	9.77442956110693	2.4583389931467e-05	0.0145288435894105	-0.210395659840715	-0.113362161285527	0.021706470010369
chr14:66796103	GPHN	-	0.595153702506644	0.675591030560605	-0.0804373280539609	-4.80371565329301	9.83931893465605	0.000753259099002319	0.0443110822222114	-0.117829853201236	-0.0430448029066858	0.0167448146100863
chr14:67088995	GPHN	-	0.653532788336815	0.742867646570006	-0.089334858233191	-8.36211809827107	10.8915926734187	4.56753935552992e-06	0.00908543876784389	-0.112877187202402	-0.0657925292639801	0.0106832810997565
chr14:67216360	FAM71D	-	0.593689351584088	0.698198561702147	-0.104509210118058	-5.88723586961527	6.61845378001144	0.000746825081507151	0.0441639564950727	-0.146981191446314	-0.0620372287898031	0.0177518299644563
chr14:67217255	FAM71D	-	0.637910472106731	0.722457478289121	-0.0845470061823901	-6.22466140581258	8.36549122012	0.000209783678847418	0.0279408656518493	-0.11563190284384	-0.0534621095209399	0.0135825871754952
chr14:77170087	AC007375.2	-	0.624906839192554	0.710032643934443	-0.0851258047418895	-5.55089580598286	10.0221732808407	0.000241852280829033	0.0291975079867912	-0.119285200629921	-0.0509664088538576	0.0153355075860259
chr14:77170087	TMEM63C	-	0.624906839192554	0.710032643934443	-0.0851258047418895	-5.55089580598286	10.0221732808407	0.000241852280829033	0.0291975079867912	-0.119285200629921	-0.0509664088538576	0.0153355075860259
chr14:79768975	NRXN3	+	0.657842157842158	0.809964989944573	-0.152122832102415	-5.92922573458487	6.46140297239286	0.000783704149259978	0.0449066857575001	-0.213831039319765	-0.090414624885064	0.025656441314941
chr14:79768975	AC008056.1	+	0.657842157842158	0.809964989944573	-0.152122832102415	-5.92922573458487	6.46140297239286	0.000783704149259978	0.0449066857575001	-0.213831039319765	-0.090414624885064	0.025656441314941
chr14:79811673	NRXN3	-	0.601953844965787	0.690903774587985	-0.0889499296221985	-4.45279188511375	10.9200672658719	0.000991647620830944	0.0489808415382912	-0.132956580605173	-0.0449432786392241	0.0199762153536907
chr14:81348105	STON2	+	0.57859810590903	0.659870772502351	-0.0812726665933211	-5.06535852257439	10.8892240305482	0.000374804611274851	0.0339327485263871	-0.116630914787009	-0.0459144183996329	0.0160448004284632
chr14:86399650	LINC02309	+	0.649221143002656	0.750131078072255	-0.100909935069599	-5.24976495571802	9.09088894723459	0.000510795211239518	0.0382070985822613	-0.144326490480946	-0.0574933796582515	0.0192218005797933
chr14:88763071	EML5	+	0.640969023348886	0.731874608863856	-0.0909055855149701	-9.42196506078372	9.90981201555377	2.92467415562922e-06	0.00826154702955546	-0.112429801746031	-0.0693813692839087	0.00964826179342768
chr14:99972847	EVL	-	0.400414790422098	0.280857214680744	0.119557575741354	4.53010527124458	10.6049657521906	0.000940535062677674	0.0479780778612647	0.0612045554103864	0.177910596072321	0.0263917875154603
chr15:101056551	LRRK1	+	0.655296696891568	0.739744365169248	-0.0844476682776799	-5.66358934030286	10.980560326487	0.000146818885401263	0.024981224232867	-0.117272827061079	-0.0516225094942803	0.0149106270252928
chr15:101056551	AC090907.2	+	0.655296696891568	0.739744365169248	-0.0844476682776799	-5.66358934030286	10.980560326487	0.000146818885401263	0.024981224232867	-0.117272827061079	-0.0516225094942803	0.0149106270252928
chr15:101413620	PCSK6	+	0.621678321678322	0.708630952380952	-0.0869526307026307	-5.4397513184454	10.082500885811	0.000276875024941628	0.030584083081164	-0.122529231788973	-0.0513760296162881	0.0159846701829525
chr15:101649200	TM2D3	-	0.635485667951391	0.723310948310948	-0.0878252803595573	-6.96877896709994	6.09416598942454	0.000405316470825586	0.0347769318933624	-0.118547786693135	-0.0571027740259799	0.012602678428199
chr15:20317717	AC026495.2	+	0.493154542516653	0.582230217461183	-0.0890756749445301	-5.99508352259683	10.9732039590416	9.08044564006656e-05	0.0214583497888767	-0.121787924047174	-0.0563634258418862	0.0148581207599166
chr15:20732568	AC012414.4	-	0.631443011987404	0.718533688533689	-0.0870906765462849	-5.87507768019715	9.92818934017568	0.000160736688823726	0.0256900188942537	-0.120152458912239	-0.0540288941803305	0.0148237489420501
chr15:22667997	WHAMMP3	+	0.670121520779416	0.762131006248653	-0.0920094854692377	-4.70839227552981	10.2946709141604	0.000767810186223277	0.044606762782452	-0.135382521990455	-0.0486364489480207	0.0195415929865114
chr15:24319804	PWRN1	+	0.571555073279211	0.668298771121352	-0.0967436978421405	-5.00068394044786	8.73275537190847	0.000808528029822008	0.0454638358692687	-0.14071260956914	-0.0527747861151407	0.0193460932532913
chr15:24778005	PWRN1	-	0.569157954846314	0.652468069918197	-0.0833101150718837	-6.96627773804697	10.9992998482019	2.37265192198451e-05	0.0144972576225426	-0.109632027276543	-0.0569882028672242	0.0119590573624244
chr15:24778005	AC090983.2	-	0.569157954846314	0.652468069918197	-0.0833101150718837	-6.96627773804697	10.9992998482019	2.37265192198451e-05	0.0144972576225426	-0.109632027276543	-0.0569882028672242	0.0119590573624244
chr15:26694971	GABRB3	+	0.623852855499129	0.713433468758423	-0.0895806132592933	-5.85495598769101	10.9038580301499	0.000114002869324459	0.023124857701867	-0.123291867611402	-0.0558693589071844	0.0152999635603787
chr15:27335953	GABRG3	+	0.643302775655717	0.734419987808294	-0.0911172121525768	-5.90722693160712	8.15241044384366	0.0003336645038572	0.032436195809296	-0.126571221481055	-0.0556632028240988	0.0154247015067335
chr15:27789213	OCA2	-	0.536427787898376	0.668168228829993	-0.131740440931617	-6.90148892446417	10.5949839691493	3.1271848259516e-05	0.0157730597902813	-0.173951167325757	-0.0895297145374779	0.0190886984494937
chr15:29350465	FAM189A1	-	0.604536324974616	0.695739970273077	-0.0912036452984614	-5.39079603526801	7.94640612799339	0.000668074708320051	0.0423404883743104	-0.130263394468502	-0.0521438961284211	0.0169184003070758
chr15:29500992	FAM189A1	+	0.566751293818963	0.656655844155844	-0.0899045503368812	-7.55919608419338	10.8285185178405	1.2214750696748e-05	0.0122431187612213	-0.116132415437938	-0.0636766852358245	0.0118934010092522
chr15:29735927	TJP1	+	0.564768881911739	0.647141723450444	-0.0823728415387051	-4.92336853234602	10.2511769494003	0.000559392049995521	0.0397709429923012	-0.119528373335196	-0.0452173097422138	0.0167309924084545
chr15:31121635	TRPM1	+	0.604759552042161	0.72853435121237	-0.123774799170209	-5.47572566621915	10.709565396541	0.000212454361207556	0.0280390017225343	-0.173691579150445	-0.073858019189973	0.0226042732443301
chr15:31410758	KLF13	+	0.523212026069169	0.703456970184659	-0.18024494411549	-9.1973660252417	7.19346887125134	3.12472736780024e-05	0.0157730597902813	-0.226334094284234	-0.134155793946746	0.0195974525337816
chr15:31952142	CHRNA7	-	0.661374450619302	0.764347826086957	-0.102973375467655	-4.74187299124729	10.3204557430307	0.000724117295443412	0.043668102373958	-0.151156226442178	-0.0547905244931309	0.0217157599239217
chr15:38476786	FAM98B	-	0.643058124710426	0.774422494949872	-0.131364370239446	-4.81925722597401	9.4886350893699	0.0008159437817498	0.0456299326703931	-0.192546076836701	-0.0701826636421906	0.0272582192814777
chr15:38737624	LINC02694	+	0.590907883660417	0.693909200702679	-0.103001317042262	-5.70953800285572	10.9719010486961	0.000137594308136937	0.0245820989106407	-0.142719981779328	-0.063282652305196	0.0180402191894938
chr15:39374973	AC013652.1	+	0.650953108516134	0.735748701189878	-0.0847955926737439	-6.60192115049239	6.30731755537784	0.000472394493301746	0.036970606724819	-0.115856431651059	-0.0537347536964292	0.0128440783736745
chr15:46547060	AC012405.1	-	0.603421381028501	0.692767528751613	-0.0893461477231122	-7.11441734017447	10.5218728182441	2.47838854612189e-05	0.0145288435894105	-0.117141158825979	-0.0615511366202456	0.0125584631110383
chr15:47261522	SEMA6D	-	0.624181561963517	0.71265873015873	-0.0884771681952133	-5.21653305655461	10.5597660298445	0.000328030982495185	0.0323203105842077	-0.125998648389949	-0.0509556880004781	0.0169609139319152
chr15:47365987	AC023905.1	+	0.544302948452108	0.630826393941844	-0.0865234454897357	-6.56215413044406	6.8244740592486	0.000351220656001281	0.0330499565170706	-0.117864835337143	-0.0551820556423286	0.0131852199399469
chr15:47365987	SEMA6D	+	0.544302948452108	0.630826393941844	-0.0865234454897357	-6.56215413044406	6.8244740592486	0.000351220656001281	0.0330499565170706	-0.117864835337143	-0.0551820556423286	0.0131852199399469
chr15:49935944	ATP8B4	-	0.609054228979041	0.791091966916439	-0.182037737937398	-7.13589901103678	7.2856495250766	0.000155139362156082	0.0253743589602666	-0.241883475888751	-0.122191999986044	0.0255101337134743
chr15:53604772	WDR72	+	0.609574515611667	0.725980392156863	-0.116405876545195	-6.26220304731258	9.88365161398423	9.84504452080308e-05	0.0221114816557442	-0.157890145218126	-0.074921607872265	0.0185886461466865
chr15:54044789	UNC13C	-	0.670347704299111	0.762394976597763	-0.0920472722986521	-5.07490475769247	10.2867114321352	0.000440850515336622	0.0358965558954024	-0.132308498847369	-0.0517860457499352	0.0181377339464604
chr15:54388103	UNC13C	-	0.498700874150367	0.579681266445972	-0.0809803922956048	-6.24578835754969	8.51053577355821	0.000190575038889155	0.0271587769272678	-0.110569779704586	-0.0513910048866236	0.0129655998025803
chr15:54388373	UNC13C	-	0.614563131104484	0.694774625958837	-0.0802114948543521	-5.06551753282818	7.93166826991431	0.000996128130454421	0.0490739710643024	-0.116781455718359	-0.043641533990345	0.0158348074672576
chr15:56456426	MNS1	-	0.636829836829837	0.727972076656287	-0.0911422398264503	-5.64313205430858	9.24296240763873	0.000286885957541374	0.0309962904072435	-0.127532470086838	-0.0547520095660629	0.0161510024839597
chr15:56786713	AC090517.4	-	0.64746118543111	0.72957729468599	-0.0821161092548801	-4.89588852120001	10.8934422631526	0.000488384885607032	0.0375202061709805	-0.119076156413127	-0.0451560620966329	0.0167724630369552
chr15:58103136	ALDH1A2	-	0.5913421778968	0.679295441148889	-0.0879532632520896	-5.58410186484923	10.589807227882	0.000188750246066112	0.0270731429193471	-0.122784759397972	-0.0531217671062075	0.015750655231728
chr15:58256659	ALDH1A2	+	0.601893004338657	0.714115000220841	-0.112221995882184	-6.84903212878755	10.7021769433123	3.17931108199491e-05	0.0158046982457887	-0.148408153798737	-0.0760358379656319	0.0163850882536377
chr15:58662038	ADAM10	-	0.671190712687117	0.777922727045534	-0.106732014358417	-5.27740344818169	9.54951485171721	0.000418316414261512	0.0352452182659608	-0.152084471051017	-0.0613795576658176	0.0202243424074753
chr15:65583055	INTS14	+	0.62061821384072	0.709646665683817	-0.0890284518430972	-6.38289521202552	8.99160951898751	0.000128343656469992	0.0240158515070811	-0.120585448238664	-0.0574714554475306	0.0139479732763536
chr15:65811760	RAB11A	-	0.628233671090814	0.736196191120126	-0.107962520029312	-8.41602537300997	10.9674545061171	4.10137836955004e-06	0.00872403079760069	-0.13620744012112	-0.0797175999375046	0.0128282075260308
chr15:66993459	AC087482.1	+	0.536539341836877	0.633209994903543	-0.0966706530666659	-5.35809371948594	8.46983832800135	0.00056123144959045	0.0398254780703698	-0.137877228805589	-0.0554640773277433	0.0180419862226562
chr15:67351926	IQCH	-	0.491622144166251	0.665599807318209	-0.173977663151958	-4.54526973750887	10.9995611697337	0.00083668534778606	0.0460454270304957	-0.258224394538343	-0.0897309317655723	0.0382766421355028
chr15:67351926	IQCH-AS1	-	0.491622144166251	0.665599807318209	-0.173977663151958	-4.54526973750887	10.9995611697337	0.00083668534778606	0.0460454270304957	-0.258224394538343	-0.0897309317655723	0.0382766421355028
chr15:72419906	TMEM202-AS1	+	0.659589533273744	0.742146312979646	-0.0825567797059025	-5.12988387855984	10.4153314736956	0.000390497359453228	0.0344545111765847	-0.118222014507475	-0.0468915449043297	0.0160933037979564
chr15:75992432	NRG4	-	0.627300393841747	0.711688311688312	-0.0843879178465645	-5.30057469175842	10.6386947538067	0.000282145091584459	0.0307429665997838	-0.119574491607243	-0.0492013440858857	0.0159205223497321
chr15:76090686	TMEM266	+	0.640335158453625	0.722406145367933	-0.0820709869143077	-5.00959791739731	8.0915606751364	0.0010053468577792	0.0492336685397339	-0.119775393841867	-0.0443665799867489	0.0163827493279035
chr15:78606863	CHRNA3	+	0.623768738264537	0.725775334996934	-0.102006596732397	-8.52011836173746	10.0348964757312	6.60076261170576e-06	0.00987318726232253	-0.128670283974975	-0.0753429094898192	0.0119724389264935
chr15:81678568	AC104041.1	+	0.626497415307676	0.712751322751323	-0.0862539074436465	-5.23429264977477	10.9997471658752	0.000279292956027663	0.0306303313094319	-0.12252320214651	-0.0499846127407828	0.0164786176881719
chr15:81678568	AC023034.1	+	0.626497415307676	0.712751322751323	-0.0862539074436465	-5.23429264977477	10.9997471658752	0.000279292956027663	0.0306303313094319	-0.12252320214651	-0.0499846127407828	0.0164786176881719
chr15:81678568	AC060809.1	+	0.626497415307676	0.712751322751323	-0.0862539074436465	-5.23429264977477	10.9997471658752	0.000279292956027663	0.0306303313094319	-0.12252320214651	-0.0499846127407828	0.0164786176881719
chr15:81815812	AC104041.1	-	0.60339908690749	0.721064877563929	-0.117665790656439	-9.59603641442829	10.9997208741365	1.11473133859463e-06	0.00613902586200456	-0.144654168951971	-0.0906774123609063	0.0122619158134415
chr15:81883928	AC104041.1	+	0.643843677822006	0.734092382505695	-0.0902487046836892	-5.14899376479541	10.5336415291189	0.000366041744591515	0.033611394843295	-0.129035759348903	-0.0514616500184757	0.0175274449351125
chr15:82612294	CPEB1	+	0.645002546473135	0.791603535353535	-0.146600988880401	-6.84475670943565	7.21307487777232	0.000212319746660672	0.028029980249748	-0.196944798941859	-0.0962571788189426	0.0214179984919417
chr15:83316142	AC103876.1	-	0.592439306725021	0.718946988683831	-0.12650768195881	-5.69154091385012	9.20751512739908	0.000273302522531393	0.0304589870154518	-0.176617150342255	-0.0763982135753642	0.022227316621929
chr15:84114087	EFL1P1	-	0.668790243370075	0.751053916843391	-0.0822636734733152	-4.59641908754274	10.8007432255752	0.000806732607158572	0.045418280705331	-0.12174429802528	-0.04278304892135	0.0178973396260291
chr15:86697411	AGBL1	-	0.651657513956363	0.475866200119459	0.175791313836904	5.11047106934279	10.6616495692931	0.000373492159366191	0.0338752107807663	0.0997870770557499	0.251795550618058	0.0343982602487388
chr15:87406450	AC020687.1	+	0.576791660720232	0.665826637672613	-0.0890349769523808	-6.02265416290863	9.51194258195026	0.000157332458864969	0.0255086775817727	-0.122204859886384	-0.0558650940183778	0.0147833454394103
chr15:87623177	AC020687.1	+	0.49698635657737	0.621625816677072	-0.124639460099701	-7.275083695574	10.9990996696434	1.59318353512569e-05	0.0133017933768811	-0.162347939235031	-0.0869309809643715	0.0171323747348129
chr15:88594332	LINC01586	-	0.614805395842548	0.718642631482922	-0.103837235640374	-6.6863712492265	7.81103988569052	0.000172579463577595	0.026310689443378	-0.139800110725113	-0.067874360555636	0.0155296844536394
chr15:91440604	AC104035.1	+	0.671074414091655	0.763075443075443	-0.0920010289837876	-7.51399600831657	9.45821422004	2.7699488449384e-05	0.0151545365752945	-0.119495576958672	-0.0645064810089034	0.0122439549983737
chr15:92756126	FAM174B	+	0.678492935635793	0.760553414259555	-0.0820604786237619	-4.91435978227204	8.98232461109894	0.000835837229825262	0.0460221877686456	-0.119845542340363	-0.0442754149071604	0.0166981015349721
chr15:93394699	AC091078.1	-	0.644002481560085	0.725258317094954	-0.0812558355348687	-5.58834839505399	10.7023114576479	0.000180447344867816	0.0266559882992301	-0.113367594082551	-0.049144076987186	0.014540223656561
chr15:95230353	LINC01197	+	0.464815016915857	0.576463732346085	-0.111648715430228	-5.53206095632908	10.9998030610085	0.000177482373531221	0.0264717342309666	-0.15606935803161	-0.0672280728288464	0.020182119523194
chr15:95316072	LINC01197	+	0.599821428571429	0.687493869081305	-0.0876724405098768	-4.52250185581727	10.9884896859124	0.000870748693468691	0.0466912452958222	-0.130345812585405	-0.0449990684343484	0.0193858274258316
chr15:97666922	LINC00923	-	0.668134052039788	0.7501539408867	-0.0820198888469112	-4.78752626377666	9.34036267994876	0.000892874532280767	0.0471476682249402	-0.120560948804465	-0.0434788288893573	0.0171319976806163
chr15:98087788	AC022523.1	+	0.624771503977992	0.726774042950514	-0.102002538972521	-5.18509213782017	9.15012284999672	0.000545688544074847	0.039357419741926	-0.146393259582619	-0.0576118183624236	0.0196722712463512
chr15:98087788	LINC01582	+	0.624771503977992	0.726774042950514	-0.102002538972521	-5.18509213782017	9.15012284999672	0.000545688544074847	0.039357419741926	-0.146393259582619	-0.0576118183624236	0.0196722712463512
chr15:98092913	LINC01582	+	0.647849519381798	0.729086551194449	-0.0812370318126505	-6.17446314309828	10.5138835306021	8.46242198714864e-05	0.0209172832413822	-0.110359453625614	-0.0521146099996867	0.0131569384948805
chr15:98092913	AC022523.1	+	0.647849519381798	0.729086551194449	-0.0812370318126505	-6.17446314309828	10.5138835306021	8.46242198714864e-05	0.0209172832413822	-0.110359453625614	-0.0521146099996867	0.0131569384948805
chr15:99279952	LRRC28	-	0.602727853501847	0.707106666816812	-0.104378813314964	-5.37471353559148	10.3137939278876	0.00028100802251509	0.030684865107413	-0.147472258357455	-0.0612853682724739	0.0194203491262865
chr16:137817	NPRL3	-	0.580531623764706	0.716864855990243	-0.136333232225537	-6.34709059397651	10.8303813154685	5.86431691243583e-05	0.0188236735575999	-0.183700097112277	-0.0889663673387956	0.0214796417676658
chr16:14488228	PARN	+	0.650525625269871	0.747443222833028	-0.0969175975631571	-5.29806373209297	8.62908692792487	0.000569160233809358	0.040033622287389	-0.138572027732617	-0.0552631673936969	0.0182930222179246
chr16:16547080	AC136431.1	-	0.63374318783343	0.724121811618745	-0.0903786237853149	-6.76494565594313	10.6040766760615	3.7116670585779e-05	0.0166625219869005	-0.119917949044484	-0.0608392985261457	0.0133598447617854
chr16:18038803	AC091489.1	-	0.636134103991247	0.731996434937611	-0.0958623309463645	-5.62824774411595	8.98158327346401	0.000324837650661563	0.0322455184237711	-0.134404248379393	-0.0573204135133363	0.0170323580810002
chr16:18038803	AC010601.1	-	0.636134103991247	0.731996434937611	-0.0958623309463645	-5.62824774411595	8.98158327346401	0.000324837650661563	0.0322455184237711	-0.134404248379393	-0.0573204135133363	0.0170323580810002
chr16:22567654	OTOAP1	+	0.553515263914424	0.636300959625768	-0.0827856957113443	-5.45941303328644	7.53523459959592	0.000738252323509933	0.0440128994846174	-0.118132584784411	-0.0474388066382774	0.0151638454915563
chr16:26326372	AC009158.1	+	0.6265573089701	0.709681686294589	-0.0831243773244899	-5.45590360876009	10.1056726180009	0.000268427408584331	0.0302574719578921	-0.11702352275692	-0.0492252318920596	0.0152356755700419
chr16:32396737	AC138915.2	-	0.544062131344231	0.415699891067538	0.128362240276693	5.54148846448371	7.26315795318493	0.000764418949043553	0.044536547882019	0.0739881745742049	0.182736305979181	0.0231638559025048
chr16:47775650	LINC02133	+	0.628851540616246	0.747648002582213	-0.118796461965967	-5.36457650598606	10.1106861398671	0.000305259239471453	0.0316658773640467	-0.168064610909888	-0.0695283130220451	0.0221446113842179
chr16:57709275	DRC7	-	0.6410508142651	0.723194962931805	-0.0821441486667051	-5.15828413043128	10.7855222299467	0.000334634002256108	0.0324638365464453	-0.117279411738914	-0.047008885594496	0.0159247041437861
chr16:58137834	AC009107.2	+	0.654396067272486	0.832725525052891	-0.178329457780405	-10.073043358212	8.49346712741256	5.19626585844174e-06	0.00967651588733431	-0.218744908672611	-0.137914006888198	0.017703632500998
chr16:58357467	GINS3	-	0.663775160413816	0.755445208386385	-0.0916700479725689	-6.399951109169	8.12440643881488	0.000195720277149524	0.0274021979695247	-0.124612392553838	-0.0587277033912997	0.0143235544161011
chr16:6426563	RBFOX1	+	0.556688667369782	0.673097643097643	-0.116408975727861	-4.79783127013062	10.9722859328232	0.000559224190754166	0.0397709429923012	-0.169827571004339	-0.0629903804513835	0.0242628323452258
chr16:70923233	HYDIN	+	0.663182019219171	0.749494949494949	-0.0863129302757786	-6.44993365408228	8.34434232163342	0.000165050251394257	0.025915570345064	-0.116951587621756	-0.0556742729298016	0.0133819873048073
chr16:71494388	ZNF19	-	0.402122966639096	0.483140469934902	-0.081017503295806	-5.78219344164242	10.987488448185	0.000122987017257033	0.0236289738121127	-0.111861006037672	-0.0501740005539399	0.0140115518640956
chr16:72487040	LINC01572	-	0.643447029161315	0.757640235581412	-0.114193206420097	-8.85042572008475	6.96562125721941	4.89795348776515e-05	0.017879934097905	-0.144733479984754	-0.0836529328554397	0.0129025665015133
chr16:72487040	AC004158.1	-	0.643447029161315	0.757640235581412	-0.114193206420097	-8.85042572008475	6.96562125721941	4.89795348776515e-05	0.017879934097905	-0.144733479984754	-0.0836529328554397	0.0129025665015133
chr16:73584700	ZFHX3	+	0.581681617771321	0.669546112489661	-0.0878644947183402	-5.3747134929363	10.9055561197523	0.000231948378913008	0.0288304569282404	-0.123883712968294	-0.0518452764683868	0.016347754133093
chr16:74205782	AC138627.1	+	0.600648744346223	0.682140045626888	-0.0814913012806643	-5.22930495781164	8.75912119673249	0.000592345613802827	0.0404862259972644	-0.116892146796327	-0.046090455765002	0.0155835817452052
chr16:76253953	AC010528.1	-	0.588000109134563	0.711247787873175	-0.123247678738612	-5.27659667951016	10.1321702996569	0.000344045147113721	0.0329269357634057	-0.175199375445777	-0.0712959820314465	0.0233574188486305
chr16:84878006	CRISPLD2	+	0.553026466997055	0.464101430045702	0.0889250369513528	4.72997352559308	9.74700784848396	0.00086280406420498	0.0465559170025078	0.0468874549702711	0.130962618932435	0.0188003244564044
chr16:87778320	AC126696.3	-	0.438243851378553	0.520682697973055	-0.0824388465945021	-5.46550237579306	10.9784095476935	0.000197556077742953	0.0274688352132187	-0.115645350123885	-0.0492323430651189	0.0150834892981892
chr16:87778626	AC126696.3	-	0.572379929255497	0.662728701236592	-0.0903487719810954	-4.79493154420423	10.5157785259391	0.000633029262490574	0.0414790234597025	-0.132055147596102	-0.0486423963660887	0.0188425572186328
chr16:9605229	AC007221.1	-	0.534853100399319	0.650575319852647	-0.115722219453328	-7.69289657644392	8.45787244588347	4.26858921104556e-05	0.0170760844457794	-0.150086663246204	-0.0813577756604522	0.0150427369331438
chr17:10046466	AC005747.1	+	0.641096432171947	0.736000457875458	-0.0949040257035109	-5.36475476907292	9.30891815047825	0.000404437662011165	0.0347673261162053	-0.134720700031414	-0.0550873513756076	0.0176902821822573
chr17:11394620	SHISA6	-	0.612307217041436	0.698746780400006	-0.0864395633585699	-8.09494387426384	9.89450760078108	1.13355133548348e-05	0.0119750799748264	-0.110266541804013	-0.0626125849131272	0.0106782165140621
chr17:11533458	SHISA6	-	0.58872938394373	0.673070424886282	-0.0843410409425513	-6.76297863840899	10.7168844666438	3.53155031403267e-05	0.0164638018784361	-0.111878235122975	-0.0568038467621281	0.0124709902916968
chr17:11830741	DNAH9	+	0.601983708463142	0.698739272423483	-0.0967555639603406	-4.74463515280416	10.6356229767653	0.000663670069392595	0.0422706505350085	-0.141827755065385	-0.0516833728552961	0.0203926246896258
chr17:11865715	DNAH9	-	0.615661047027507	0.696170634920635	-0.0805095878931282	-5.40117733524286	10.3404918412703	0.00026800876837553	0.0302489391031137	-0.113574432900838	-0.0474447428854183	0.0149059330764425
chr17:16288229	PIGL	-	0.33957847352988	0.251288187773171	0.0882902857567091	7.00432271520399	10.968029621696	2.29145076708883e-05	0.0142888477886956	0.0605367473472658	0.116043824166152	0.0126051139198742
chr17:16958530	TNFRSF13B	+	0.585424287491957	0.666485543322125	-0.0810612558301684	-7.14995066239694	10.0257547183885	3.06322004280689e-05	0.0156518122730343	-0.10631357861763	-0.0558089330427073	0.0113373168092594
chr17:19082332	AC007952.3	+	0.55633793747384	0.658471355971356	-0.102133418497516	-6.23332569659394	7.40487654662548	0.000343568480921926	0.0329099765276797	-0.140452593144199	-0.0638142438508332	0.0163850604747518
chr17:3100785	OR1D2	+	0.551010692176106	0.652107735814632	-0.101097043638527	-6.44764034209939	8.86218158481369	0.000126884530668722	0.023865528700917	-0.136651243669348	-0.0655428436077055	0.0156796964896477
chr17:31177713	NF1	+	0.654078027972323	0.737456082564778	-0.0833780545924557	-5.51579909810497	10.9799074010538	0.000183062277614639	0.0267720518683121	-0.116656068888989	-0.0501000402959229	0.0151162239794233
chr17:31612026	AC007923.4	+	0.645060495060495	0.73437947780053	-0.0893189827400354	-6.35232086245439	10.750442270087	6.02031143904203e-05	0.0190064567443977	-0.120354565028705	-0.0582834004513655	0.0140608424344492
chr17:32600912	MYO1D	-	0.625590997859905	0.708789249965721	-0.0831982521058151	-5.69990494404476	10.7984636172819	0.000148279752570604	0.0250510136052351	-0.115398079021756	-0.0509984251898745	0.0145964279970564
chr17:32683508	MYO1D	+	0.55465736533848	0.64802223919871	-0.09336487386023	-4.77123896631767	10.6223832383429	0.000638656384609807	0.0416697455343635	-0.136621877595804	-0.0501078701246557	0.019568266129476
chr17:32683508	AC025211.1	+	0.55465736533848	0.64802223919871	-0.09336487386023	-4.77123896631767	10.6223832383429	0.000638656384609807	0.0416697455343635	-0.136621877595804	-0.0501078701246557	0.019568266129476
chr17:3324173	OR3A2	-	0.663667111924669	0.76339834293661	-0.0997312310119408	-5.56624722690568	7.47237666323438	0.000674217563865946	0.0424667045476591	-0.141561592064992	-0.0579008699588897	0.017917140031055
chr17:33431878	ASIC2	+	0.665816897478594	0.748717506326202	-0.0829006088476075	-6.13695954358302	10.2891863504199	9.76489992807841e-05	0.02202193077617	-0.112884963836381	-0.0529162538588339	0.013508417035972
chr17:33996364	AC024610.2	-	0.608669879435028	0.72841303099301	-0.119743151557983	-7.03065032183898	10.9622486468027	2.22051612668693e-05	0.0141893359179215	-0.157245183977059	-0.0822411191389065	0.0170315896932081
chr17:33996364	AC004147.4	-	0.608669879435028	0.72841303099301	-0.119743151557983	-7.03065032183898	10.9622486468027	2.22051612668693e-05	0.0141893359179215	-0.157245183977059	-0.0822411191389065	0.0170315896932081
chr17:33996364	ASIC2	-	0.608669879435028	0.72841303099301	-0.119743151557983	-7.03065032183898	10.9622486468027	2.22051612668693e-05	0.0141893359179215	-0.157245183977059	-0.0822411191389065	0.0170315896932081
chr17:34107948	ASIC2	-	0.61900463235867	0.704148817025914	-0.0851441846672444	-5.93872521862098	9.27672016516858	0.000193632824856149	0.0272886156116175	-0.117430114164485	-0.0528582551700036	0.0143371147060775
chr17:34107948	AC004147.4	-	0.61900463235867	0.704148817025914	-0.0851441846672444	-5.93872521862098	9.27672016516858	0.000193632824856149	0.0272886156116175	-0.117430114164485	-0.0528582551700036	0.0143371147060775
chr17:40044241	MED24	+	0.636904761904762	0.763968109929997	-0.127063348025236	-7.39122144147996	8.66343872858903	5.07115020682758e-05	0.0180882271357548	-0.166183874335305	-0.0879428217151662	0.0171911163846545
chr17:46278166	ARL17B	-	0.671574382901614	0.756306616213737	-0.084732233312123	-4.85842979934378	10.9940051464635	0.000504719978984075	0.0380458946757453	-0.123120519991727	-0.0463439466325193	0.017440250618331
chr17:53373077	AC034268.2	+	0.562214501185089	0.662484737484737	-0.100270236299648	-4.98289024511864	9.61867797678961	0.000619478656141642	0.041116932531186	-0.145348976278458	-0.0551914963208377	0.020122906860707
chr17:53582203	AC034268.2	+	0.524859367551247	0.610526439969613	-0.0856670724183657	-5.52942314362946	10.3626311146048	0.000221012509298205	0.0283962957307969	-0.120024468898511	-0.0513096759382201	0.0154929492992527
chr17:56501539	ANKFN1	+	0.655168804363851	0.740595479082321	-0.0854266747184703	-6.40435739429462	8.36342698027971	0.000171828668983469	0.0262954506263609	-0.115954973825391	-0.0548983756115494	0.0133388362733431
chr17:65922192	CEP112	-	0.643240961936614	0.724525862068966	-0.0812849001323515	-6.97335513838492	9.68402389257435	4.51526582704686e-05	0.017444594613869	-0.107372524934818	-0.0551972753298845	0.0116564979868755
chr17:66074733	CEP112	+	0.609153780634511	0.710452945747063	-0.101299165112553	-4.59199135548356	10.7442845343979	0.000823615042970391	0.0458012137163222	-0.149994180351197	-0.0526041498739082	0.0220599642443981
chr17:67140506	HELZ	+	0.419496828831867	0.336482035635354	0.0830147931965134	6.84530938499596	10.7062549238107	3.18855314859338e-05	0.0158046982457887	0.0562332685944998	0.109796317798527	0.0121272521850468
chr17:67152967	HELZ	+	0.67390289449113	0.795013746149511	-0.121110851658381	-5.33737723952461	10.4254929097953	0.000286053574747141	0.0309620834004813	-0.171391421371377	-0.0708302819453854	0.022691079573976
chr17:68738581	LINC01482	+	0.640189614307261	0.724281867823535	-0.0840922535162731	-4.78489020116805	10.8535223895972	0.000588585614745241	0.0403793985615657	-0.122837346772769	-0.0453471602597773	0.017574541939488
chr17:69777533	LINC01483	-	0.62428728248056	0.714207290294247	-0.089920007813687	-4.75314810494594	10.7583028975228	0.000634401868128826	0.0415265456602119	-0.131672638250682	-0.0481673773766921	0.0189179898939231
chr17:7729343	DNAH2	+	0.663254775594448	0.745252382163137	-0.0819976065686889	-4.52504470323667	10.3082750574454	0.00101854207568696	0.0495185283839756	-0.122210279438862	-0.0417849336985158	0.0181208390074108
chr17:78518210	DNAH17	+	0.643007957900141	0.729484772632457	-0.0864768147323161	-9.33138088549453	10.9614589165748	1.50908984391214e-06	0.00691471825979833	-0.106882783551871	-0.0660708459127606	0.00926731164373997
chr17:7881768	NAA38	+	0.377988669674478	0.274741269285557	0.103247400388921	5.38009934998356	9.44747832168657	0.00037667915480385	0.0339540636243169	0.060146646751877	0.146348154025966	0.0191906122308386
chr17:80935681	RPTOR	+	0.627770575270782	0.715747141150367	-0.0879765658795855	-5.64632666009549	10.772240981	0.000161819754005327	0.0257581055983643	-0.122359236444371	-0.0535938953148004	0.0155812037056492
chr17:846341	NXN	+	0.641142343224915	0.839790653103347	-0.198648309878431	-5.66338515167337	8.02444309980874	0.000468811412762839	0.0368645084262388	-0.279490605470274	-0.117806014286588	0.0350758962278481
chr18:10987712	PIEZO2	+	0.665848712690818	0.759753806664562	-0.0939050939737439	-6.97384639590621	8.72845494505192	7.5729744170713e-05	0.0203879676481639	-0.124510838831468	-0.0632993491160199	0.0134653229570511
chr18:112228	ROCK1P1	-	0.562943496786929	0.471480182828867	0.0914633139580618	7.34742517370457	8.28807428415932	6.68084604104564e-05	0.0195368371163416	0.0629301176812925	0.119996510234831	0.0124483491557555
chr18:14849409	ANKRD30B	-	0.5211716854574	0.668759018759019	-0.147587333301619	-6.04324560710473	10.3516189835695	0.000108084907192237	0.0227652604788407	-0.201753137231935	-0.0934215293713026	0.0244218658146391
chr18:15117497	AP005242.1	-	0.553397587105017	0.644462481962482	-0.0910648948574646	-4.88921037123627	10.9141131401308	0.000490855546955856	0.037617153823379	-0.132099146173416	-0.050030643541513	0.018625685528528
chr18:1721241	AP005262.2	-	0.662336091011227	0.75804347826087	-0.0957073872496425	-5.45854398499839	9.75035267613726	0.000303261083234095	0.0315832638586779	-0.134910472975126	-0.0565043015241585	0.0175335011520789
chr18:1721241	AC019183.1	-	0.662336091011227	0.75804347826087	-0.0957073872496425	-5.45854398499839	9.75035267613726	0.000303261083234095	0.0315832638586779	-0.134910472975126	-0.0565043015241585	0.0175335011520789
chr18:22010306	LINC01900	-	0.610314270708433	0.693608356996648	-0.0832940862882144	-5.18049631447233	8.97159786855095	0.000584849113325137	0.0403185654944841	-0.119683511367198	-0.0469046612092306	0.0160783989085221
chr18:27129429	CHST9	-	0.618039943250027	0.704919717963196	-0.0868797747131689	-8.55801032496177	9.85547457501191	7.14694670598567e-06	0.0100460871292394	-0.109544585070418	-0.0642149643559202	0.0101518660780018
chr18:27129429	AQP4-AS1	-	0.618039943250027	0.704919717963196	-0.0868797747131689	-8.55801032496177	9.85547457501191	7.14694670598567e-06	0.0100460871292394	-0.109544585070418	-0.0642149643559202	0.0101518660780018
chr18:27430433	AC090403.1	+	0.542452139399723	0.641720800416453	-0.0992686610167297	-7.34208448901399	10.6218562114045	1.77725393876225e-05	0.0136666101194708	-0.129156850383956	-0.0693804716495036	0.0135205010464353
chr18:27536344	AC090403.1	+	0.589533119582381	0.674404679686061	-0.0848715601036806	-5.82686607833525	10.4964383248927	0.000137934403249765	0.0246029071285386	-0.117118786156447	-0.052624334050914	0.0145655587347785
chr18:32225172	GAREM1	-	0.597255042367824	0.683820569290518	-0.0865655269226938	-5.07919578396472	9.21746393287815	0.000616222365459854	0.0410692115617958	-0.124981614402629	-0.0481494394427586	0.0170431561618447
chr18:32854302	AC090371.2	+	0.577987528344671	0.684615895800106	-0.106628367455435	-10.1182951999615	8.36573829020229	5.61034111994028e-06	0.00969589840442519	-0.130745752571831	-0.0825109823390389	0.010538175191394
chr18:33354674	CCDC178	-	0.641924682656948	0.430677166400851	0.211247516256098	5.90383469037142	10.8934242146753	0.000106649035760573	0.0226740862756589	0.132399061824072	0.290095970688123	0.0357814077349797
chr18:42174507	LINC00907	-	0.554937126365698	0.64904283518414	-0.0941057088184417	-6.61771165951755	10.1595994465954	5.51527131069625e-05	0.0183834127129105	-0.125723126946894	-0.0624882906899893	0.0142202794047546
chr18:45474978	SLC14A2-AS1	-	0.620200267568689	0.705098496274967	-0.0848982287062783	-7.52250587013703	7.39268536486472	0.000102161973755713	0.0223866075171607	-0.1113004417732	-0.0584960156393568	0.0112858973022951
chr18:45474978	SLC14A2	-	0.620200267568689	0.705098496274967	-0.0848982287062783	-7.52250587013703	7.39268536486472	0.000102161973755713	0.0223866075171607	-0.1113004417732	-0.0584960156393568	0.0112858973022951
chr18:50122858	MYO5B	+	0.624206010906778	0.712768031189084	-0.0885620202823056	-6.45371836007496	10.7067006035379	5.34626579739695e-05	0.0183468765959512	-0.118866589980466	-0.0582574505841457	0.0137226348193597
chr18:5266955	LINC00667	+	0.6147804576376	0.710350080746152	-0.0955696231085515	-5.5865705797492	9.96156675150992	0.000235261213097077	0.0289971259569879	-0.133706401589838	-0.0574328446272647	0.0171070286760508
chr18:53323004	DCC	-	0.557405823989675	0.664692028985507	-0.107286204995832	-7.4632797221984	8.9938767569112	3.8522115086402e-05	0.0166873784740293	-0.139808561936073	-0.0747638480555922	0.0143752088879539
chr18:55727667	AC022031.2	-	0.614314973301148	0.711610502786973	-0.0972955294858249	-7.9659055232254	9.58732165893433	1.57537726463947e-05	0.0132298599319784	-0.124669629819366	-0.069921429152284	0.0122139949064359
chr18:58517865	ALPK2	+	0.584506248700622	0.681141336640058	-0.0966350879394356	-7.59330857074556	10.9931992246443	1.07283796726914e-05	0.0117013195807153	-0.124647705503744	-0.0686224703751278	0.0127263480785883
chr18:60358168	AC091576.1	-	0.522772003538257	0.65749509992931	-0.134723096391053	-5.35553424747296	10.5718152646142	0.000265572553215516	0.0301225185351509	-0.190365617563935	-0.0790805752181715	0.0251558649736248
chr18:60530347	AC091576.1	+	0.638760362444573	0.724850741517408	-0.0860903790728351	-5.44235746460985	7.70436850974522	0.000698160587191885	0.043085323312065	-0.122813177577717	-0.0493675805679535	0.0158185822288699
chr18:61630227	AC105094.2	+	0.639492812552791	0.733255324921992	-0.0937625123692004	-8.40528456299376	10.2388720463381	6.53481722908833e-06	0.00983197389221267	-0.118539438570112	-0.0689855861682885	0.0111551859626516
chr18:64068613	LINC01924	-	0.511486627474985	0.752936200582258	-0.241449573107273	-5.35161261004966	9.59456424644736	0.000371604426566587	0.0338178336756707	-0.342555666014156	-0.140343480200389	0.0451171620034419
chr18:64297309	LINC01924	-	0.648217398070339	0.758175009134088	-0.109957611063749	-6.03568324171447	9.60957774223129	0.00014839601163074	0.0250516174063618	-0.150774332642615	-0.0691408894848836	0.0182179227537652
chr18:64960654	AC090348.1	+	0.582814039594332	0.666887923944227	-0.0840738843498952	-7.32445225207158	10.586435247985	1.84996179156439e-05	0.0136666101194708	-0.109458878291445	-0.0586888904083449	0.0114785217319311
chr18:67633949	AC114689.3	+	0.652313652733821	0.732545155223174	-0.080231502489353	-4.72803953879726	9.16430741295471	0.00102472294175955	0.0496137690067203	-0.118514059479526	-0.0419489454991798	0.0169692960118017
chr18:67736807	AC114689.3	-	0.640568181295507	0.766563931237844	-0.125995749942338	-5.2488119552632	10.1989631816746	0.000350517823411513	0.0330344282174118	-0.179340286635949	-0.0726512132487261	0.0240046225729227
chr18:67736807	AC022655.1	-	0.640568181295507	0.766563931237844	-0.125995749942338	-5.2488119552632	10.1989631816746	0.000350517823411513	0.0330344282174118	-0.179340286635949	-0.0726512132487261	0.0240046225729227
chr18:67865698	AC114689.3	-	0.604635290689135	0.689157412635673	-0.0845221219465384	-5.45683117469319	10.8924297287557	0.000205799990399299	0.0277224126712682	-0.118654812679034	-0.0503894312140429	0.0154892316145901
chr18:6830430	ARHGAP28	-	0.572638064549829	0.685769412120565	-0.113131347570736	-5.44225905513539	10.997673543782	0.000203355922583358	0.0276695911968434	-0.158885664168603	-0.0673770309728682	0.0207875711950874
chr18:68885135	CCDC102B	+	0.457964581922603	0.538683418031244	-0.0807188361086412	-5.51406801497715	7.86528200045112	0.000598594130766174	0.040629950891034	-0.11457666708312	-0.046861005134162	0.0146387088243009
chr18:70307471	SOCS6	-	0.586141799377094	0.667171717171717	-0.0810299177946235	-6.47512991477056	10.9767717165543	4.62655985823378e-05	0.0175739845693602	-0.108580207164395	-0.0534796284248517	0.0125140219364224
chr18:71566270	LINC01541	+	0.508055240173052	0.592350848385331	-0.0842956082122789	-5.92674762487131	6.541583886255	0.000750666605919725	0.0442441129657947	-0.118411171685772	-0.0501800447387856	0.0142229117127472
chr18:9760133	RAB31	-	0.605138432184468	0.709950043917435	-0.104811611732967	-6.57905529352543	10.2594062829979	5.5326206074906e-05	0.0184010271529427	-0.140187039881589	-0.0694361835843453	0.0159311036397755
chr19:17484388	SLC27A1	+	0.650306959593887	0.735397442064109	-0.0850904824702221	-5.13661470237023	10.315002304619	0.000398655213421682	0.0346968972269464	-0.121848451951241	-0.0483325129892028	0.016565478900132
chr19:22637996	ZNF492	-	0.641564691010504	0.770020622604209	-0.128455931593705	-6.04565759933736	8.71429863117425	0.000218235827421905	0.0282865642706783	-0.17676271394748	-0.0801491492399311	0.0212476359243012
chr19:28068434	AC010511.1	+	0.636996190140671	0.722004917772843	-0.0850087276321722	-12.5361326064768	10.3428793588437	1.38522515717559e-07	0.00260410950055712	-0.100050332247986	-0.0699671230163583	0.00678109671464807
chr19:30484472	ZNF536	-	0.553681149879307	0.673812158092077	-0.12013100821277	-8.81284552591665	9.86689240697938	5.47540746336732e-06	0.00969589840442519	-0.150559186171209	-0.0897028302543319	0.0136313529903016
chr19:31239667	TSHZ3	-	0.553534457261165	0.644108005521049	-0.0905735482598836	-5.17778385805427	10.9588713926859	0.000308503820194687	0.0317341042952994	-0.129092412642081	-0.0520546838776862	0.017492724830333
chr19:32913035	CEP89	+	0.648939384366187	0.820275287189856	-0.17133590282367	-8.55071764702094	6.85955733280773	6.67721263652511e-05	0.0195368371163416	-0.218914674891846	-0.123757130755493	0.0200376050170903
chr19:36854700	ZNF345	-	0.634983682568997	0.716072286631497	-0.0810886040624997	-4.48408259785883	10.9967139903172	0.000925835649234912	0.0477280857939711	-0.120891912157889	-0.0412852959671104	0.0180836553058188
chr19:41989646	ATP1A3	-	0.613745545379065	0.702723844839904	-0.0889782994608391	-7.88108827496504	9.47355852070655	1.84964263284558e-05	0.0136666101194708	-0.11432499441911	-0.0636316045025681	0.0112901031375941
chr19:41989646	AC010616.1	-	0.613745545379065	0.702723844839904	-0.0889782994608391	-7.88108827496504	9.47355852070655	1.84964263284558e-05	0.0136666101194708	-0.11432499441911	-0.0636316045025681	0.0112901031375941
chr19:52138661	AC011468.2	-	0.394946914061051	0.313070424705025	0.0818764893560257	4.67109935654121	10.9997521138923	0.000681366119853599	0.0426577749962642	0.0432968275332968	0.120456151178754	0.0175283125248383
chr19:52138661	ZNF616	-	0.394946914061051	0.313070424705025	0.0818764893560257	4.67109935654121	10.9997521138923	0.000681366119853599	0.0426577749962642	0.0432968275332968	0.120456151178754	0.0175283125248383
chr19:54855462	KIR3DL2	+	0.415775729646697	0.525184959967569	-0.109409230320871	-5.86754997800615	8.98065409565921	0.000240493345289114	0.0291694966433042	-0.151604383559185	-0.0672140770825577	0.0186464931242136
chr19:57803610	ZNF586	-	0.343596372343773	0.233354961296138	0.110241411047635	7.66890740036011	10.5720089648406	1.23100867754477e-05	0.0122910336890304	0.07844502215166	0.14203779994361	0.0143751130757503
chr19:57803621	ZNF586	-	0.360642863589676	0.266452991452991	0.0941898721366841	5.22058997297783	10.9688698438644	0.000287905144608263	0.0310114405000232	0.054465948665026	0.133913795608342	0.0180419976715693
chr19:57803627	ZNF586	-	0.341941941941942	0.254605959342801	0.0873359825991405	4.67862779700137	9.35333988911855	0.00104071833901378	0.0498928022466358	0.0453502001562038	0.129321765042077	0.0186670080178457
chr19:57803633	ZNF586	-	0.335579698079698	0.228156288156288	0.10742340992341	6.53636288069376	10.9889560919879	4.23313157956746e-05	0.0170760844457794	0.0712463601324049	0.143600459714415	0.0164347377714758
chr19:6093786	RFX2	+	0.559093586500814	0.661391337741268	-0.102297751240453	-5.26568961898513	10.1210820179486	0.000350796419196493	0.0330422841553474	-0.145514220566054	-0.0590812819148525	0.0194272277028302
chr19:8501456	PRAM1	-	0.399747078318507	0.48143629756759	-0.0816892192490835	-4.70063303426785	10.8343378700931	0.000676675116979232	0.0425186963959706	-0.120010173941894	-0.0433682645562729	0.0173783442897084
chr19:8574169	MYO1F	-	0.634430246221874	0.729443656318656	-0.0950134100967828	-6.37645317282773	9.8845110693455	8.50323698714572e-05	0.0209484212908323	-0.128266822884031	-0.0617599973095343	0.0149006677413813
chr19:8575008	MYO1F	-	0.624159867254016	0.707333469000136	-0.08317360174612	-5.24913876039839	8.20716812954995	0.000713190277936438	0.0433576308927094	-0.119552752366226	-0.0467944511260135	0.0158451901431174
chr2:103916481	LINC01965	-	0.575651209100241	0.657590612002377	-0.0819394029021357	-9.84948978130316	8.47066117889024	6.32406823132882e-06	0.0097754614274205	-0.100939435914801	-0.0629393698894705	0.00831915202934446
chr2:111008264	MIR4435-2HG	-	0.629738562091503	0.726936843113314	-0.0971982810218105	-6.00325900539946	10.9932361549962	8.90711762985358e-05	0.0212984545874	-0.132836929009756	-0.0615596330338653	0.0161909191214952
chr2:111008264	ACOXL	-	0.629738562091503	0.726936843113314	-0.0971982810218105	-6.00325900539946	10.9932361549962	8.90711762985358e-05	0.0212984545874	-0.132836929009756	-0.0615596330338653	0.0161909191214952
chr2:115492717	DPP10	+	0.564650442116646	0.658407835555906	-0.0937573934392603	-5.02722741441358	10.1687076623822	0.000490471971027238	0.0376025846670801	-0.135218745210031	-0.0522960416684894	0.0186499208630284
chr2:115521452	DPP10	-	0.561848072562358	0.667073201398144	-0.105225128835786	-5.12415918613058	10.9908490197488	0.000332187801895688	0.0324341719498215	-0.15042717411914	-0.0600230835524323	0.0205351014700316
chr2:121959334	AC011246.1	-	0.622526598903024	0.713339498665586	-0.0908128997625618	-5.86093618147872	8.72899026518409	0.000270676353631097	0.0303753460135412	-0.126030724547693	-0.0555950749774302	0.0154946064844626
chr2:122528166	AC011246.1	+	0.666394763033418	0.74841792344148	-0.0820231604080612	-5.35979314210638	10.5339192711029	0.000267164093402276	0.0301762136282921	-0.115888481347142	-0.0481578394689803	0.0153034190375165
chr2:12612462	MIR3681HG	+	0.604104625533197	0.712229532163743	-0.108124906630546	-5.72923618449472	10.8759875207847	0.000138239872394491	0.0246144063479906	-0.149720818821651	-0.0665289944394402	0.0188724819764227
chr2:13032051	AC093912.1	+	0.481990231990232	0.636634460547504	-0.154644228557272	-4.45555968265885	10.9339651325867	0.00098408627799073	0.048829598535264	-0.231092676101598	-0.0781957810129466	0.0347081488234018
chr2:131976956	AJ239322.1	+	0.627282684635626	0.733275862068966	-0.10599317743334	-5.79987989383552	6.50789837004863	0.000863456427875918	0.0465559170025078	-0.149878156485228	-0.0621081983814516	0.0182750642036564
chr2:1322023	SNTG2	-	0.57651671636634	0.658036408036408	-0.0815196916700677	-5.23952913897629	8.68139372043779	0.000601678083774919	0.0407264134269437	-0.116913556939644	-0.0461258264004915	0.0155585911458439
chr2:132502820	GPR39	-	0.612982121078096	0.694649126485708	-0.0816670054076118	-5.91672519837633	8.52475924354709	0.000277512905044277	0.0305882779626833	-0.113158334469369	-0.0501756763458542	0.013802737607287
chr2:132601774	GPR39	+	0.609166212633032	0.719087558886409	-0.109921346253378	-6.58961206120388	9.67603898340062	7.18476917091352e-05	0.0200072004495563	-0.147258308682292	-0.0725843838244633	0.016681004167231
chr2:13262937	AC093912.1	+	0.637920262478857	0.737073728740395	-0.0991534662615381	-6.1694594642282	10.9989014987496	7.01477137327586e-05	0.019849895115105	-0.134527386513607	-0.0637795460094688	0.0160716618427352
chr2:135294435	ZRANB3	-	0.661968352558415	0.803742784992785	-0.14177443243437	-8.06835339154528	9.61759108388158	1.38732862047563e-05	0.0126806687967529	-0.18113859376911	-0.10241027109963	0.017571668660787
chr2:135426079	ZRANB3	+	0.567066861709719	0.670231146001073	-0.103164284291355	-5.09451275826584	8.91003075773593	0.000670593302909084	0.0423691481479125	-0.149043751885837	-0.0572848166968725	0.0202500786996697
chr2:137550914	THSD7B	+	0.514724491195079	0.602911836671427	-0.088187345476348	-4.88855319622554	9.83687697289455	0.000664914078421687	0.0422813532167061	-0.12847252046595	-0.0479021704867456	0.0180395593412868
chr2:13902147	LINC00276	-	0.609102597481824	0.689305400481871	-0.0802028030000471	-6.09990351442391	10.9948662491567	7.75376004080916e-05	0.0204852965475591	-0.109143463371216	-0.0512621426288781	0.013148208461068
chr2:141356914	LRP1B	-	0.537821827295512	0.632309941520468	-0.0944881142249563	-4.69992382546098	10.9884454737501	0.000652071394592201	0.0419706681155664	-0.138742793328121	-0.0502334351217914	0.0201041799258712
chr2:14328624	LINC00276	+	0.556296510507037	0.662707431457431	-0.106410920950395	-8.02870615767107	6.35947744833436	0.000148015891247459	0.0250394883990734	-0.138402586984585	-0.0744192549162043	0.0132538068850264
chr2:143664743	ARHGAP15	+	0.560653235653236	0.475639148193278	0.0850140874599575	4.87460058547934	9.63361276562198	0.000721035399912449	0.0435998875300794	0.0459536025131858	0.124074572406729	0.0174402160688203
chr2:144514301	ZEB2	-	0.532496534376234	0.634343434343434	-0.101846899967201	-6.12392664943251	10.7057177730618	8.39619017962934e-05	0.0209100254284428	-0.138574577022891	-0.0651192229115106	0.0166309797287723
chr2:145707125	AC079163.2	-	0.628756957328386	0.716544426199599	-0.0877874688712127	-6.22072355966704	10.3278544663881	8.5875304569957e-05	0.0209782518890289	-0.119096408853577	-0.0564785288888488	0.0141120993449051
chr2:148152152	MBD5	-	0.578395310693447	0.441461988304094	0.136933322389354	5.83785263907024	10.0320087653513	0.000162246843182625	0.0257908067566117	0.0846924436464459	0.189174201132262	0.0234561114943049
chr2:149151008	LYPD6B	-	0.67216993532783	0.75814428935046	-0.0859743540226303	-6.6854323018574	9.33686387671521	7.57301797831147e-05	0.0203879676481639	-0.114906381805019	-0.0570423262402414	0.012859954321689
chr2:149395564	LYPD6	-	0.611282767575674	0.732750582750583	-0.121467815174909	-4.75114883272494	10.6646729302295	0.000651963534974437	0.0419706681155664	-0.177954795926792	-0.0649808344230265	0.0255659882381001
chr2:149642572	MMADHC-DT	-	0.636096443180774	0.720735442094138	-0.0846389989133638	-5.35617623838161	7.5102500113452	0.000839325867581089	0.0461044456305918	-0.121496573904306	-0.0477814239224218	0.0158021310626138
chr2:149941263	MMADHC-DT	-	0.647745326456755	0.735974737983313	-0.0882294115265587	-5.63638896316062	6.84423812554564	0.000849783738971656	0.0463111792283955	-0.12541559302185	-0.0510432300312679	0.0156535349322457
chr2:152347799	FMNL2	-	0.650182800392884	0.742211435236798	-0.0920286348439131	-6.729377738307	7.66337269501278	0.000180205446503032	0.0266469552060283	-0.123807508903636	-0.0602497607841903	0.0136756529983508
chr2:153533958	AC012501.2	-	0.616983908948195	0.702729735304975	-0.0857458263567801	-6.67581218584542	9.69581038182776	6.40635906157362e-05	0.019362214742542	-0.114486779895382	-0.0570048728181785	0.0128442538480314
chr2:155540100	AC073225.1	-	0.624953798638009	0.719414735591206	-0.094460936953197	-5.19524315617076	8.58408464868119	0.000660695916501055	0.0421871471396455	-0.135897724129618	-0.0530241497767764	0.0181821974667343
chr2:158307389	CCDC148	+	0.518785853522696	0.658018553055318	-0.139232699532622	-15.8445027378379	9.73664853924193	2.83199289043672e-08	0.00105176489644385	-0.158884369255645	-0.119581029809599	0.00878744520016545
chr2:164958221	AC019197.1	+	0.577728818800247	0.6903785256188	-0.112649706818553	-6.03947894349519	7.75653013913805	0.000349704944936421	0.0330344282174118	-0.155897951247175	-0.0694014623899304	0.0186522227947962
chr2:165023585	AC019197.1	+	0.606570278725178	0.688447114162217	-0.0818768354370387	-5.50499559127317	9.62116754048476	0.000298260336644309	0.031417067121661	-0.115194090971403	-0.0485595799026742	0.0148731881941621
chr2:171095434	TLK1	+	0.598431504165754	0.688654721147718	-0.0902232169819639	-7.26210717108823	10.7546195072065	1.8324608930855e-05	0.0136666101194708	-0.11764420531471	-0.0628022286492174	0.0124238344128491
chr2:177659888	PDE11A	-	0.423209319695731	0.517202954702955	-0.0939936350072236	-5.18025184599311	9.77646248709035	0.000444094341805459	0.0360235096999535	-0.134547990917573	-0.0534392790968738	0.0181446072124712
chr2:177659888	AC012499.1	-	0.423209319695731	0.517202954702955	-0.0939936350072236	-5.18025184599311	9.77646248709035	0.000444094341805459	0.0360235096999535	-0.134547990917573	-0.0534392790968738	0.0181446072124712
chr2:178029758	PDE11A	+	0.543931256713212	0.636035452107891	-0.0921041953946796	-5.70513464442535	10.12062233705	0.000188189577924097	0.0270575548122542	-0.12801743686919	-0.0561909539201691	0.0161440879374648
chr2:178705535	TTN-AS1	+	0.649468745540174	0.760322908721078	-0.110854163180904	-7.87026927264616	9.64803429734135	1.68035465053224e-05	0.0135948936669268	-0.142393784505717	-0.0793145418560906	0.0140851804862875
chr2:178705535	TTN	+	0.649468745540174	0.760322908721078	-0.110854163180904	-7.87026927264616	9.64803429734135	1.68035465053224e-05	0.0135948936669268	-0.142393784505717	-0.0793145418560906	0.0140851804862875
chr2:178927961	AC092640.1	+	0.667436952579125	0.748750942684766	-0.0813139901056413	-7.21244532227492	10.8911129958528	1.82091301604965e-05	0.0136666101194708	-0.106158467533064	-0.0564695126782186	0.0112741222251642
chr2:178927961	CCDC141	+	0.667436952579125	0.748750942684766	-0.0813139901056413	-7.21244532227492	10.8911129958528	1.82091301604965e-05	0.0136666101194708	-0.106158467533064	-0.0564695126782186	0.0112741222251642
chr2:179713354	ZNF385B	-	0.633978719693005	0.716773504273504	-0.0827947845804988	-4.54089749262849	10.9696274335705	0.000848537006346309	0.0462931513607836	-0.122939198850219	-0.0426503703107783	0.0182331322640303
chr2:181604287	CERKL	+	0.578676878676879	0.68196638131983	-0.103289502642951	-5.61677947479907	8.37710818163798	0.000424158765881579	0.0353742578988291	-0.145365661012119	-0.0612133442737829	0.0183894530854171
chr2:18354657	KCNS3	-	0.64024309024309	0.722299350975822	-0.0820562607327313	-5.42297355217286	10.9630151226275	0.000211711313429514	0.0280205858931397	-0.115373586590446	-0.0487389348750169	0.015131230116336
chr2:184319606	AC020584.1	-	0.562055933651678	0.671073236756731	-0.109017303105052	-8.6960478866219	8.70877401229746	1.39663544039014e-05	0.0127296430845843	-0.137521876916428	-0.0805127292936769	0.0125364193627275
chr2:184321774	AC020584.1	+	0.645616219470737	0.728318851598421	-0.0827026321276849	-7.31979158828176	9.81873476994792	2.80669108122787e-05	0.0152282740759902	-0.107940387810011	-0.0574648764453593	0.0112984954735711
chr2:187353021	AC007319.1	-	0.622776033490319	0.726139601139601	-0.103363567649282	-5.66056387316907	9.4507862429198	0.000258307031800471	0.0299077486388151	-0.144372822783143	-0.062354312515421	0.0182602952577256
chr2:187353021	CALCRL	-	0.622776033490319	0.726139601139601	-0.103363567649282	-5.66056387316907	9.4507862429198	0.000258307031800471	0.0299077486388151	-0.144372822783143	-0.062354312515421	0.0182602952577256
chr2:187777981	LINC01090	+	0.582907832907833	0.669046041677621	-0.0861382087697877	-6.23803345245874	10.9910320629234	6.38914839789022e-05	0.0193416583030989	-0.116533652416506	-0.0557427651230691	0.0138085519140389
chr2:188760038	DIRC1	+	0.665497692873676	0.83340947208594	-0.167911779212265	-9.59801528483862	7.81510712056568	1.35132930727694e-05	0.0125466481018469	-0.208420737691148	-0.127402820733381	0.0174944271528203
chr2:188760038	AC092598.1	+	0.665497692873676	0.83340947208594	-0.167911779212265	-9.59801528483862	7.81510712056568	1.35132930727694e-05	0.0125466481018469	-0.208420737691148	-0.127402820733381	0.0174944271528203
chr2:194472131	LINC01821	-	0.546269809466564	0.633787279090667	-0.0875174696241036	-5.54758201942203	10.99990164388	0.000173391391771076	0.0263590562459969	-0.122239779516244	-0.0527951597319636	0.0157757865170277
chr2:195965730	DNAH7	-	0.571926703791885	0.662394957983193	-0.0904682541913087	-4.86999144059466	9.17549299686834	0.000835617450152079	0.0460189588260409	-0.132369413786776	-0.0485670945958414	0.0185766762210699
chr2:197380080	NPM1P46	-	0.657274546182109	0.775488400488401	-0.118213854306291	-5.06418852734653	10.4198562132516	0.000430459076980951	0.035563398991389	-0.169942838949082	-0.0664848696635009	0.0233430990311555
chr2:1993892	MYT1L	-	0.509568175096125	0.625426656676657	-0.115858481580531	-4.48144712063903	10.7044711555514	0.00099378971169327	0.0490207406388644	-0.17295262225334	-0.0587643409077223	0.0258529172523206
chr2:199641805	LINC01877	-	0.650963593099143	0.735595813204509	-0.0846322201053659	-4.99835353424791	8.21592622052308	0.000974157630816066	0.0486551330564053	-0.123499628457239	-0.0457648117534927	0.0169320196191565
chr2:2000966	MYT1L	-	0.613029581186259	0.702063740856844	-0.0890341596705851	-4.96111165626783	10.9973334469696	0.000428343964745491	0.0354816581715989	-0.128535117341287	-0.0495332019998834	0.0179464131911041
chr2:202904062	WDR12	+	0.62333427523056	0.783214788287252	-0.159880513056692	-5.35207836001798	9.25942853119293	0.000418893605013385	0.0352634655136297	-0.227169521693602	-0.0925915044197814	0.0298726031836639
chr2:204800383	PARD3B	+	0.614629093437528	0.707471938050583	-0.0928428446130549	-4.60039896739822	10.9149986813838	0.000779969476765719	0.0448369663330003	-0.137304215862928	-0.0483814733631819	0.020181476709087
chr2:207329436	AC009226.1	+	0.646241606690523	0.737463102199944	-0.0912214955094212	-4.55437472338731	10.8491700767049	0.000853682252529993	0.0464125183961786	-0.135380847955066	-0.0470621430637768	0.0200294224893237
chr2:21128416	TDRD15	-	0.622213813755167	0.702468644902855	-0.0802548311476883	-7.51544569070149	10.811621729375	1.30029625494606e-05	0.0124909674818869	-0.103808446806686	-0.0567012154886905	0.0106786522650259
chr2:21680090	AC018742.1	+	0.650928721739408	0.742687316472483	-0.091758594733075	-5.90923449622837	10.796140616035	0.000109721248761667	0.0228990623475653	-0.126014394624722	-0.0575027948414281	0.0155280002497178
chr2:217969559	TNS1	+	0.640492094273607	0.729037267080745	-0.0885451728071385	-5.25482480256268	10.4166465762227	0.000324034114479939	0.0322268939212194	-0.125887331648872	-0.0512030139654051	0.0168502616422067
chr2:218624926	PLCD4	+	0.557435869084476	0.657499185402411	-0.100063316317935	-5.68391792316007	9.6141831453686	0.000234940637817893	0.028989217913764	-0.139503314210005	-0.0606233184258657	0.0176046377992565
chr2:219011145	AC097468.1	-	0.643630367126608	0.770456590193432	-0.126826223066825	-5.36754497135214	10.996848773343	0.000227858743674836	0.0287171552945011	-0.178833685695712	-0.074818760437937	0.0236283484803064
chr2:219011145	CFAP65	-	0.643630367126608	0.770456590193432	-0.126826223066825	-5.36754497135214	10.996848773343	0.000227858743674836	0.0287171552945011	-0.178833685695712	-0.074818760437937	0.0236283484803064
chr2:22044788	AC096570.1	+	0.62948564041001	0.711227976697926	-0.0817423362879154	-6.50209667914982	10.8604656968273	4.68708884160629e-05	0.0175958392234221	-0.109455872316293	-0.0540288002595381	0.0125716888446211
chr2:22261919	AC096570.1	-	0.59401292289491	0.683835200746965	-0.089822277852055	-4.67298666963883	9.52063531231889	0.00100046236900596	0.0491434811200416	-0.132944776373717	-0.0466997793303928	0.0192215994185571
chr2:22341174	AC096570.1	+	0.630356481883568	0.712400592612721	-0.0820441107291532	-6.55526499097619	10.9970207425276	4.11122302538777e-05	0.0169849113555006	-0.109592019060833	-0.0544962023974729	0.0125157580726474
chr2:228501133	LINC01807	-	0.668324120526965	0.757468550603562	-0.089144430076597	-5.43073578850832	10.9189310479942	0.000212217087618881	0.0280228918146252	-0.12530591069724	-0.0529829494559538	0.0164147978373816
chr2:228610680	LINC01807	+	0.605831905278485	0.693699999661086	-0.0878680943826017	-5.83988328466722	9.54500127173834	0.000196530456900175	0.0274369756347874	-0.12161102114127	-0.0541251676239337	0.0150462072783718
chr2:228764232	LINC01807	+	0.664731347084288	0.756404901141743	-0.0916735540574549	-5.25292848428862	9.46981883509638	0.000444854198541537	0.0360326526071314	-0.130855923739361	-0.0524911843755485	0.0174518945635084
chr2:238671429	LINC01937	-	0.635816527567965	0.71974287966935	-0.0839263521013852	-5.33352151523406	10.8596269143196	0.0002504729009386	0.0295825062966333	-0.118614951445852	-0.049237752756918	0.0157356358011621
chr2:240814156	KIF1A	+	0.65885941804539	0.744416704153546	-0.0855572861081562	-7.37984400865224	10.7148738472437	1.61625478520967e-05	0.0133702924426896	-0.111157217217205	-0.0599573549991076	0.0115933732485196
chr2:241883255	LINC01237	-	0.492804226953939	0.394878677966913	0.0979255489870262	4.8665724901749	10.1203252236411	0.000632715111818607	0.041473843746226	0.0531629169855723	0.14268818098848	0.0201220775370607
chr2:25788655	ASXL2	-	0.616099166939503	0.739779942279942	-0.123680775340439	-7.31762235793954	10.7752708259731	1.69193197212608e-05	0.0135948936669268	-0.160976200362278	-0.0863853503186009	0.0169017707242363
chr2:26958587	AC013472.1	+	0.640603129737036	0.748882125111149	-0.108278995374114	-7.51612333227167	9.57091124932421	2.5877749449566e-05	0.0147871102220771	-0.140574213705917	-0.0759837770423104	0.0144062291938719
chr2:33974795	LINC01320	-	0.67233981976629	0.764743399909944	-0.0924035801436532	-5.75968405819047	6.83363290228951	0.000754013846384894	0.0443110822222114	-0.130527673657119	-0.0542794866301871	0.0160431682033413
chr2:34415805	LINC01320	-	0.585838928872985	0.673611622295833	-0.0877726934228482	-9.05310073291327	10.9460192657682	2.05122090726846e-06	0.00744337738554534	-0.109124791568443	-0.0664205952772537	0.00969531832378089
chr2:34930482	AC012593.1	-	0.604156207937721	0.691603679818783	-0.0874474718810623	-4.92237066943074	9.48527171925288	0.000704262804104611	0.0431604494694941	-0.127324168924573	-0.0475707748375518	0.0177653162985337
chr2:35271731	AC013442.2	-	0.618547910148513	0.891528716749858	-0.272980806601345	-11.3467860768511	6.78707044445018	1.16378312457312e-05	0.0120588268004134	-0.330232707199246	-0.215728906003444	0.024057984767886
chr2:36420015	CRIM1	-	0.617920758046808	0.536747198879552	0.0811735591672567	5.70207647889304	10.4631912516186	0.000166616350759117	0.0259825571693178	0.0496435510418747	0.112703567292639	0.0142357892721592
chr2:37959635	RMDN2	-	0.631163388432296	0.717226064867066	-0.0860626764347703	-6.10731277920332	10.5415481471263	9.17384582002702e-05	0.021570765395584	-0.117243759241992	-0.0548815936275487	0.0140917420715428
chr2:37959635	RMDN2-AS1	-	0.631163388432296	0.717226064867066	-0.0860626764347703	-6.10731277920332	10.5415481471263	9.17384582002702e-05	0.021570765395584	-0.117243759241992	-0.0548815936275487	0.0140917420715428
chr2:40661140	AC007317.1	+	0.611088459910162	0.694893994893995	-0.0838055349838324	-5.30437594783877	10.394789642035	0.000303289451987591	0.0315832638586779	-0.118828225280017	-0.0487828446876473	0.01579932037396
chr2:47958163	AC092650.1	+	0.35237304908368	0.153216394084516	0.199156654999164	4.72035029555254	10.8796086799255	0.000648237421031249	0.0418843524026541	0.106169197976529	0.2921441120218	0.0421910753502357
chr2:49080076	FSHR	+	0.613212878084616	0.694011197710304	-0.0807983196256877	-5.53031374871735	8.0266691506979	0.00054722454455324	0.0394108197591229	-0.114469746971746	-0.0471268922796298	0.0146100787942506
chr2:49080076	AC009975.1	+	0.613212878084616	0.694011197710304	-0.0807983196256877	-5.53031374871735	8.0266691506979	0.00054722454455324	0.0394108197591229	-0.114469746971746	-0.0471268922796298	0.0146100787942506
chr2:49320780	AC009975.2	+	0.535147509296116	0.644459298871064	-0.109311789574947	-6.98056461275818	10.937038734468	2.39852379354283e-05	0.0145288435894105	-0.143802225474657	-0.0748213536752378	0.015659448144805
chr2:49320780	AC009975.1	+	0.535147509296116	0.644459298871064	-0.109311789574947	-6.98056461275818	10.937038734468	2.39852379354283e-05	0.0145288435894105	-0.143802225474657	-0.0748213536752378	0.015659448144805
chr2:51505418	AC007402.1	-	0.611254446037055	0.698593073593074	-0.0873386275560188	-5.0732666870307	9.70557758171126	0.000529438188610598	0.0388688096955247	-0.125855379545196	-0.0488218755668422	0.0172154615445885
chr2:51781742	AC007402.1	+	0.578300501341976	0.679623784012863	-0.101323282670887	-7.47309572805805	10.8455539051751	1.34541614223318e-05	0.0125361183087104	-0.131217068091597	-0.0714294972501762	0.0135584082364239
chr2:56243347	AC007744.1	-	0.466026466327965	0.727680914413225	-0.26165444808526	-9.66867092642359	10.2668571940649	1.76881369274646e-06	0.00711885085989471	-0.321740775413561	-0.201568120756958	0.0270620905475417
chr2:56243347	CCDC85A	-	0.466026466327965	0.727680914413225	-0.26165444808526	-9.66867092642359	10.2668571940649	1.76881369274646e-06	0.00711885085989471	-0.321740775413561	-0.201568120756958	0.0270620905475417
chr2:58289229	LINC01795	-	0.587942858950682	0.673312490673781	-0.0853696317230992	-7.8626760842276	8.82200901750605	2.85031736591766e-05	0.015333260009175	-0.110006930432184	-0.0607323330140146	0.0108575796342863
chr2:58822040	LINC01122	-	0.570403162998782	0.654099190283401	-0.0836960272846183	-4.75368087952734	10.8726982376229	0.00061561351765473	0.0410535447648128	-0.122503260935341	-0.0448887936338959	0.0176065725499311
chr2:59955842	AC007100.1	+	0.648363504400656	0.735536360510648	-0.0871728561099915	-6.87939034103283	7.26647144107886	0.000198794418484739	0.0274688352132187	-0.116915104476383	-0.0574306077436002	0.0126715961427628
chr2:60058186	AC007132.1	+	0.613331113331113	0.720256754739513	-0.1069256414084	-4.74033641126492	9.28098935967949	0.000972458210046938	0.048626824600625	-0.157717580933352	-0.0561337018834484	0.0225565512933433
chr2:60058186	AC007100.1	+	0.613331113331113	0.720256754739513	-0.1069256414084	-4.74033641126492	9.28098935967949	0.000972458210046938	0.048626824600625	-0.157717580933352	-0.0561337018834484	0.0225565512933433
chr2:61450570	USP34	+	0.629339144564709	0.721364765363817	-0.0920256207991081	-8.04258191443211	9.4851685682341	1.55006686824305e-05	0.0131760087304325	-0.117709473853095	-0.0663417677451208	0.0114422982293748
chr2:62585496	AC092155.1	-	0.647046657046657	0.736174055829228	-0.0891273987825711	-9.40004145836026	9.44051386511722	4.24929362333988e-06	0.00884498615311338	-0.11042466009748	-0.0678301374676625	0.00948159635012062
chr2:62908409	EHBP1	-	0.610480046159317	0.692236368646084	-0.0817563224867665	-5.88538780310238	9.09237037677278	0.000224135466829923	0.0285382286675572	-0.113132273240456	-0.050380371733077	0.0138914078769236
chr2:6330680	AC017053.1	-	0.59428352349405	0.698202614379085	-0.103919090885035	-4.70407387992508	10.9808080341514	0.000648928541147358	0.0419021496277925	-0.152552076926474	-0.0552861048435961	0.022091296509716
chr2:66605833	LINC01798	-	0.565919701213819	0.670911346994938	-0.10499164578112	-5.3919109713204	10.3102311003267	0.000274404374791762	0.0304873679664513	-0.148201805418727	-0.0617814861435121	0.0194720659038271
chr2:6891350	RSAD2	+	0.651233603489243	0.749159154083089	-0.0979255505938467	-5.69691366174394	7.90866931773682	0.000475487888818303	0.0371011129417371	-0.137643801886785	-0.0582072993009088	0.0171892284854936
chr2:72344506	EXOC6B	-	0.583997544141869	0.664514516648663	-0.0805169725067941	-5.36603586504916	8.72932781419729	0.00050194975450196	0.037910019802846	-0.114621590861639	-0.0464123541519492	0.0150049262680536
chr2:72611911	EXOC6B	+	0.583100817311344	0.70625	-0.123149182688656	-5.54555067935118	6.88304926695617	0.000915168334737487	0.0475183817426407	-0.175841437408875	-0.0704569279684374	0.0222068446957309
chr2:73414643	ALMS1	-	0.512883838417672	0.596501864148923	-0.0836180257312512	-5.52322546136614	9.97362506830731	0.000255817188368113	0.0298566923113023	-0.11736268800843	-0.0498733634540724	0.015139346803085
chr2:76376510	AC073091.3	-	0.63197243932538	0.72567529935951	-0.0937028600341294	-8.31238695454092	7.23189374121437	5.93576397352551e-05	0.0188458115741808	-0.120186214107872	-0.0672195059603873	0.0112726778176443
chr2:76899593	LRRTM4	+	0.555916410042278	0.644299187402636	-0.0883827773603579	-7.11731820332384	10.520467816913	2.47120811515188e-05	0.0145288435894105	-0.115867353964486	-0.0608982007562297	0.0124179887473743
chr2:77258650	AC013716.1	+	0.55628081191991	0.647078468188308	-0.0907976562683983	-6.24626995721443	10.280897658575	8.46609946181633e-05	0.0209172832413822	-0.123066999530381	-0.0585283130064154	0.0145363003665135
chr2:77258650	LRRTM4	+	0.55628081191991	0.647078468188308	-0.0907976562683983	-6.24626995721443	10.280897658575	8.46609946181633e-05	0.0209172832413822	-0.123066999530381	-0.0585283130064154	0.0145363003665135
chr2:77493182	LRRTM4	+	0.616752440106477	0.716402499552009	-0.099650059445532	-6.20638571918805	10.9024488383149	6.91966423324741e-05	0.0197842677116189	-0.135027811213255	-0.0642723076778089	0.0160560532255428
chr2:77725388	AC012494.1	+	0.657749151670124	0.741878074266636	-0.0841289225965117	-5.54802520556254	7.86059258868883	0.000576683499030507	0.0402029104350367	-0.119204856135998	-0.0490529890570256	0.0151637599829508
chr2:77971778	AC012494.1	+	0.529841649578492	0.6502585961921	-0.120416946613608	-5.50485233720822	10.5058754857299	0.000217990408925591	0.028283678383176	-0.168840542136996	-0.0719933510902203	0.0218746914971161
chr2:78124155	AC012494.1	-	0.665529185358354	0.772990168702378	-0.107460983344024	-8.42638564103476	6.89471224465548	7.11793972211002e-05	0.0199556037787579	-0.137710440456978	-0.0772115262310702	0.0127529154161556
chr2:78124155	AC012494.2	-	0.665529185358354	0.772990168702378	-0.107460983344024	-8.42638564103476	6.89471224465548	7.11793972211002e-05	0.0199556037787579	-0.137710440456978	-0.0772115262310702	0.0127529154161556
chr2:78161771	AC012494.1	-	0.616755299838007	0.699688057040998	-0.0829327572029916	-5.8745938056864	8.36914749842325	0.000313206123124256	0.0318562268248075	-0.115238801934503	-0.0506267124714801	0.0141171900468617
chr2:80812710	AC012355.1	+	0.558523281805626	0.640214317845897	-0.0816910360402712	-5.96427006442786	10.148190617455	0.000130546218748694	0.0241761700419828	-0.112148967864911	-0.0512331042156314	0.0136967365927129
chr2:84333836	AC106874.1	+	0.638075504884261	0.730582770056454	-0.0925072651721935	-6.1873188008824	6.77543213390995	0.000512755339099151	0.0382573117170482	-0.12809994890913	-0.0569145814352567	0.0149511069575081
chr2:84335697	AC106874.1	+	0.613649049363335	0.710809451985923	-0.0971604026225875	-6.08366456237681	8.57591165979412	0.0002226549910082	0.0284916016247278	-0.133562825234639	-0.0607579800105358	0.0159707034512482
chr2:91619988	LSP1P4	-	0.639297920124988	0.729651607231587	-0.0903536871065989	-5.1557223447853	7.8225261305171	0.000931468536878135	0.0478262970981593	-0.130926404105933	-0.0497809701072646	0.0175249326989042
chr2:91619988	AC116050.1	-	0.639297920124988	0.729651607231587	-0.0903536871065989	-5.1557223447853	7.8225261305171	0.000931468536878135	0.0478262970981593	-0.130926404105933	-0.0497809701072646	0.0175249326989042
chr2:91710558	AC027612.2	+	0.592223889458912	0.733565621370499	-0.141341731911587	-5.89044852317418	10.4189179874427	0.000129942589555061	0.0241367969094257	-0.194516126036546	-0.0881673377866276	0.0239950712336286
chr2:98249845	VWA3B	+	0.621712593504221	0.701955646692489	-0.0802430531882679	-4.5153860269065	10.9806554717457	0.000882559859737386	0.046930303438266	-0.119365231560668	-0.0411208748158675	0.0177710283705782
chr2:994200	SNTG2	-	0.594788673109824	0.675801808344912	-0.0810131352350882	-5.32649844671009	10.9143231208719	0.000248878372434715	0.0295018950542204	-0.114521007770391	-0.0475052626997855	0.0152094543996584
chr2:994914	SNTG2	-	0.615122972265829	0.709010721247563	-0.0938877489817339	-7.3587240624938	10.1025006373203	2.29687830691728e-05	0.0142923961560985	-0.122276854705319	-0.0654986432581486	0.0127586994952378
chr20:13979095	SEL1L2	+	0.638126577328029	0.723839987173321	-0.0857134098452913	-9.1116995070118	10.9838196309481	1.87779134057567e-06	0.00717132853470487	-0.106421715136511	-0.0650051045540711	0.00940696187130969
chr20:14461272	MACROD2	-	0.597221368834272	0.68267797581822	-0.0854566069839477	-5.49011765864345	7.68883375748476	0.000665469875082673	0.0422813532167061	-0.121605219653339	-0.0493079943145568	0.0155655328897019
chr20:19837460	RIN2	-	0.44343359518366	0.544116846536201	-0.100683251352541	-6.40719247699089	10.5287822794333	6.14443285368209e-05	0.0191409735845035	-0.135459545655527	-0.0659069570495553	0.0157140981348865
chr20:21310894	XRN2	-	0.501329622758194	0.299010369662544	0.202319253095651	5.32801403202941	10.3065433490358	0.000301505808644659	0.0315030698163677	0.118050599290272	0.28658790690103	0.0379727327817469
chr20:2555483	TMC2	-	0.58854611227282	0.679677247780696	-0.0911311355078757	-5.2462696523262	10.1471361857598	0.000357773670404122	0.0332978546783991	-0.129759426774075	-0.0525028442416764	0.017370654111816
chr20:30348820	FAM242A	+	0.397055264793664	0.48012049846289	-0.0830652336692253	-5.23318180068074	9.79573558090499	0.00040928368358465	0.0349089301723449	-0.118532249810755	-0.0475982175276956	0.0158727972451521
chr20:31306758	DEFB116	+	0.555798952509479	0.641402116402116	-0.0856031638926376	-5.92902837306538	10.8664892804126	0.00010389499975791	0.0225297935323211	-0.117428633423032	-0.0537776943622434	0.0144379750789386
chr20:31893197	TTLL9	-	0.613536181816328	0.693919339322565	-0.0803831575062376	-8.496527959091	9.65438127972342	8.70567286769828e-06	0.011070630724234	-0.101565664487784	-0.0592006505246913	0.00946070652544965
chr20:32381804	ASXL1	-	0.676059654631083	0.872656332462614	-0.19659667783153	-6.13395487006221	7.63868008451928	0.000335941912942072	0.0325263956831612	-0.271118365549065	-0.122074990113996	0.0320505582444131
chr20:33081076	BPIFB4	+	0.636493058761966	0.725485588972431	-0.0889925302104647	-4.96380260357131	10.9837253292193	0.000428106604770364	0.0354816581715989	-0.128459581769484	-0.0495254786514454	0.0179282975810596
chr20:44562556	PKIG	+	0.655593348450491	0.735772907647908	-0.0801795591974163	-5.9334573435264	7.10903405851303	0.000546875901738008	0.0394048027171939	-0.11203394493024	-0.0483251734645923	0.0135131264211236
chr20:58925162	AL109840.2	-	0.628872053872054	0.718925718435522	-0.0900536645634684	-7.05644983515226	10.0252769385911	3.42664923193961e-05	0.016250957847986	-0.118479221253619	-0.061628107873318	0.0127618939647043
chr20:60155045	MIR646HG	-	0.66808481457099	0.759620132953466	-0.0915353183824766	-5.23966463901596	7.77791336609342	0.000857803180211253	0.0464758122348027	-0.132021599612904	-0.0510490371520488	0.0174696902738545
chr20:6513558	CASC20	+	0.647955595570024	0.733929146537842	-0.0859735509678184	-6.36712088248025	10.1490251441718	7.64654984752415e-05	0.0204411040845982	-0.115999746872465	-0.0559473550631722	0.0135027357819423
chr20:9813240	PAK5	+	0.633096586597021	0.718094163193909	-0.0849975765968872	-7.58135201350465	10.8958466520758	1.14676047850587e-05	0.0119750799748264	-0.109702512779174	-0.0602926404146003	0.0112114008748679
chr21:10031397	CR382285.1	-	0.567591442374051	0.669246005833442	-0.101654563459391	-5.6508728631041	9.11494565722692	0.0002989774563917	0.0314537729740757	-0.142270820394196	-0.0610383065245863	0.0179891790033214
chr21:10434446	BAGE2	+	0.554268538479065	0.675552728422747	-0.121284189943683	-4.54570926103229	10.8171035439361	0.00087231364136837	0.0467412131769284	-0.18013010347757	-0.0624382764097948	0.0266810266515241
chr21:10460380	BAGE2	-	0.663097980493133	0.774126984126984	-0.111029003633851	-5.28469436296785	8.35639706064153	0.000643407938275138	0.0417519919555616	-0.159119772040634	-0.0629382352270689	0.0210095411405208
chr21:14199259	LIPI	+	0.606143561346262	0.700352893567997	-0.0942093322217347	-5.25464805969835	10.7881734042198	0.000288638310872389	0.0310248220161287	-0.133765009261455	-0.0546536551820141	0.0179287615747843
chr21:15016680	NRIP1	+	0.626956923120125	0.709741145253652	-0.0827842221335269	-5.72682650507525	10.4855435683899	0.000159552855559699	0.0255993813626349	-0.114792089198263	-0.0507763550687907	0.0144555142468803
chr21:15610497	AJ009632.2	+	0.631853346771779	0.811676619673357	-0.179823272901578	-14.4530351363283	10.7649569877755	2.16494262683442e-08	0.00101843952699087	-0.20728084479634	-0.152365701006815	0.0124419038081202
chr21:21965352	AP000472.1	+	0.589384831700103	0.690376541735237	-0.100991710035135	-4.97412555766503	10.8185541878783	0.000440784220271733	0.0358952998582163	-0.145770826242691	-0.0562125938275782	0.0203034098887007
chr21:25972238	APP	+	0.647252419026613	0.740257103852766	-0.0930046848261531	-6.15469817802557	9.71271469344593	0.000121813800928235	0.0235501328518775	-0.126809949175955	-0.0591994204763516	0.0151111690835161
chr21:29734494	GRIK1	-	0.669585020242915	0.772466927931409	-0.102881907688494	-5.36313171966703	8.65371620562724	0.000518815908064483	0.0384957584949613	-0.146543421263112	-0.0592203941138753	0.0191831774914678
chr21:29734547	GRIK1	-	0.614603199139187	0.707105367399485	-0.0925021682602976	-5.32269132695553	10.5034495720857	0.000285032912875382	0.0309096664325834	-0.130974508233975	-0.0540298282866205	0.0173788338602019
chr21:32178173	LINC00159	-	0.635236822001528	0.738680033416875	-0.103443211415348	-5.45121156571364	10.9961645284861	0.000200716613674804	0.0275442760969312	-0.14521129541946	-0.0616751274112353	0.0189761872509172
chr21:37417277	DYRK1A	-	0.668150844253785	0.847014731818653	-0.178863887564868	-5.46562809315954	7.64157713880419	0.000698944145889555	0.043085323312065	-0.254948961896632	-0.102778813233104	0.0327252210571596
chr21:40228752	DSCAM	-	0.598917112091352	0.688925475109686	-0.0900083630183336	-4.85146821518395	10.8601929855673	0.000528603687437991	0.0388555634041407	-0.130907047650093	-0.0491096783865739	0.0185528089695875
chr21:45874342	AJ011931.2	-	0.662215320910973	0.745146077754773	-0.0829307568438002	-4.51920921155741	10.9465912709105	0.000883893522921047	0.0469572406515783	-0.123344481890216	-0.0425170317973848	0.0183507230937027
chr21:45874342	PCBP3	-	0.662215320910973	0.745146077754773	-0.0829307568438002	-4.51920921155741	10.9465912709105	0.000883893522921047	0.0469572406515783	-0.123344481890216	-0.0425170317973848	0.0183507230937027
chr21:8789747	CR381670.2	-	0.555007023052136	0.636915818959163	-0.0819087959070268	-5.20922010208166	10.5944071497747	0.000328133249915081	0.0323203105842077	-0.116679008739243	-0.0471385830748108	0.0157238116842664
chr21:8833273	CR381670.2	+	0.637245770102913	0.765945193867021	-0.128699423764108	-4.75900804454341	10.4126949314398	0.000688037229242223	0.0428397732512429	-0.18863356550844	-0.0687652820197753	0.0270433297358411
chr21:9085464	TEKT4P2	+	0.559272777667698	0.658844295800817	-0.0995715181331196	-5.09349570367491	9.39041029835809	0.000570182454553838	0.0400418686623306	-0.143515200407999	-0.0556278358582406	0.019548758637664
chr22:15336942	ZNF72P	-	0.482375674407694	0.382003798670465	0.100371875737229	6.54266408665028	10.0013010198365	6.52914403689258e-05	0.0193987054840956	0.0661903054124589	0.134553446061999	0.0153411323595275
chr22:22996335	AC245054.1	+	0.634686941860006	0.858980910524774	-0.224293968664767	-7.21678535572374	9.27659423791189	4.26429479676795e-05	0.0170760844457794	-0.294282391960254	-0.154305545369281	0.0310794845085529
chr22:24840912	SGSM1	-	0.495547692761315	0.718465608465608	-0.222917915704293	-5.67524112064238	10.599644221215	0.000164868173150426	0.0259027866102135	-0.309770528100177	-0.13606530330841	0.0392790210962986
chr22:28637596	TTC28	+	0.606085767640389	0.694633838383838	-0.0885480707434489	-11.3823607936012	9.06713498180241	1.13187858711122e-06	0.00613902586200456	-0.106126480132277	-0.0709696613546213	0.00777941170106189
chr22:35187913	LINC01399	+	0.656691297208539	0.758977133977134	-0.102285836768595	-5.75637237960004	9.00818455835221	0.000273148732302573	0.0304589870154518	-0.142476877301528	-0.0620947962356627	0.017769148697031
chr22:37951657	AL031587.3	-	0.557045282759568	0.660326751523109	-0.103281468763541	-6.02725719262235	9.200576238953	0.000179113105559108	0.0265736757370984	-0.141916753208055	-0.0646461843190266	0.0171357327989856
chr22:37951657	C22orf23	-	0.557045282759568	0.660326751523109	-0.103281468763541	-6.02725719262235	9.200576238953	0.000179113105559108	0.0265736757370984	-0.141916753208055	-0.0646461843190266	0.0171357327989856
chr22:42010345	WBP2NL	-	0.582738787214491	0.666014876159804	-0.0832760889453131	-5.99097169893897	9.35103291929959	0.00017554462968396	0.0264154855451593	-0.114541650544931	-0.0520105273456956	0.0139002641191014
chr22:43693117	EFCAB6	+	0.553662434873615	0.667960272180221	-0.114297837306606	-5.23672490625949	10.4086291693534	0.000333689701011498	0.032436195809296	-0.162672101058562	-0.0659235735546497	0.0218262061407857
chr22:44905368	PHF21B	-	0.606647955624938	0.71837059794049	-0.111722642315553	-7.98996331320241	10.93876431133	6.84555396452925e-06	0.010009488779944	-0.142519771302126	-0.080925513328979	0.0139828730040531
chr22:47701178	AL117329.1	-	0.636023496540474	0.907776426957461	-0.271752930416987	-14.0709694297593	8.97675032651368	2.0158810115828e-07	0.00330808418048425	-0.315459274386274	-0.228046586447701	0.019313021165567
chr22:47976662	AL117329.1	-	0.584334629447411	0.716483516483516	-0.132148887036105	-4.72615063138458	10.3059015445045	0.000744800499356923	0.0440943965476024	-0.194200589157562	-0.0700971849146478	0.0279612093102903
chr3:100229304	AC129803.1	+	0.514042604221176	0.614825238768326	-0.10078263454715	-6.03905841629307	10.9757020916987	8.51850029034452e-05	0.020951383591416	-0.137523628833559	-0.0640416402607409	0.0166884682345916
chr3:100791708	ABI3BP	+	0.560507246376812	0.657239620283099	-0.096732373906287	-5.12664205903657	7.82844701826905	0.000962508395323871	0.0484324462559583	-0.140409890482535	-0.0530548573300387	0.018868564021508
chr3:102309645	ZPLD1	+	0.331046804686787	0.532411522301228	-0.201364717614441	-5.82976566059674	9.08508401323705	0.000241089766491767	0.0291805355272061	-0.279390010053483	-0.123339425175399	0.0345407910605157
chr3:10545443	ATP2B2	+	0.577355942376951	0.708281062501011	-0.130925120124061	-7.72003254375843	7.28378383969748	9.29778936684139e-05	0.021631255361378	-0.170712549550991	-0.0911376906971306	0.0169591409598283
chr3:106960284	LINC00882	-	0.653334060897086	0.737301587301587	-0.0839675264045012	-8.81138474907696	8.34731600369324	1.65381345245276e-05	0.01350681314261	-0.105784305490952	-0.0621507473180504	0.009529435928138
chr3:106976825	LINC00882	+	0.574629774914971	0.669073625455112	-0.0944438505401414	-6.35709248427317	10.7900641319863	5.88273267965468e-05	0.018829549322135	-0.127220473140318	-0.0616672279399645	0.0148564537599203
chr3:109096129	MORC1	+	0.629076981232376	0.727178995972099	-0.0981020147397238	-6.10841306867266	8.15207723239581	0.000265813077299497	0.0301225185351509	-0.135016867435954	-0.0611871620434933	0.0160601474780488
chr3:109442901	LINC01205	-	0.658931362142966	0.768858583683441	-0.109927221540475	-7.79479643722276	8.54451462483175	3.65241352427379e-05	0.0166184793946662	-0.142090742010828	-0.0777637010701207	0.0141026417335975
chr3:112226989	SLC9C1	+	0.628957176336209	0.721665024215021	-0.0927078478788119	-8.01739074297186	10.9942395112166	6.41979959581871e-06	0.0097754614274205	-0.118160223678931	-0.0672554720786932	0.0115633440917272
chr3:11573090	VGLL4	+	0.657258416186988	0.860196145047081	-0.202937728860093	-6.36063305643912	8.77391120650585	0.000146608246665869	0.024981224232867	-0.275396968885607	-0.130478488834579	0.0319052721732864
chr3:118428699	AC068633.1	+	0.635964035964036	0.747190212850968	-0.111226176886932	-5.30593921001844	9.07802493064139	0.000476122259913062	0.0371038838701361	-0.158584771587129	-0.0638675821867355	0.0209625803245012
chr3:119129353	IGSF11	+	0.677807120415816	0.764198150212643	-0.0863910297968269	-9.18453008414503	10.5711413741205	2.30388212173607e-06	0.00757519586300553	-0.107196751423915	-0.0655853081697388	0.00940614587848768
chr3:121602607	FBXO40	-	0.643909238336483	0.730743525480368	-0.0868342871438846	-9.23804522662954	8.06204344132413	1.45279908628041e-05	0.0129047433819039	-0.108480891571757	-0.0651876827160127	0.00939963866961557
chr3:121804728	IQCB1	-	0.671921839882198	0.760081178528759	-0.0881593386465613	-5.18170909327891	8.38454744204352	0.000724620303993372	0.043668102373958	-0.127081674750126	-0.0492370025429966	0.0170135638762336
chr3:125804695	AC092902.4	-	0.516139455782313	0.598181216931217	-0.082041761148904	-4.85355968302386	10.7990242734658	0.000535468431304578	0.0390539601372272	-0.119330589757415	-0.0447529325403933	0.0169034206864415
chr3:131938004	CPNE4	+	0.584633370256315	0.685178454156782	-0.100545083900467	-5.12172010748077	8.5228637870684	0.00074314095007324	0.0440883020266463	-0.145335634946641	-0.0557545328542934	0.0196311164590215
chr3:132100002	CPNE4	+	0.648366316223459	0.406051587301587	0.242314728921872	6.55909052035564	8.8300324885553	0.000113507967991878	0.0231170756607185	0.158497221653934	0.32613223618981	0.0369433427042768
chr3:132106194	CPNE4	-	0.630625516650361	0.720507307626127	-0.0898817909757654	-5.35768032990371	8.04102363398385	0.000668077685431664	0.0423404883743104	-0.128533567857304	-0.0512300140942272	0.0167762511835753
chr3:133073366	TMEM108	-	0.660069758115063	0.863155363155363	-0.2030856050403	-4.64760270211639	10.9825914459246	0.000710807589975826	0.0433042042557318	-0.299280329717416	-0.106890880363184	0.0436968514859973
chr3:133346596	TMEM108	-	0.630381382265985	0.72248547567175	-0.0921040934057651	-6.00256162851433	8.96669995017828	0.000204894661291587	0.0277224126712682	-0.12683458978069	-0.05737359703084	0.0153441312402754
chr3:134247294	RYK	+	0.458972245645153	0.371998074781123	0.08697417086403	6.13987957189429	7.11757061955004	0.000442235639150015	0.0359595465811962	0.0535900368362036	0.120358304891856	0.0141654522447248
chr3:134490276	CEP63	-	0.601563352613773	0.691815044858523	-0.0902516922447504	-6.01906329031566	9.88200778483052	0.000135224263905391	0.0244131326908152	-0.123715244629454	-0.0567881398600464	0.0149943085645835
chr3:134784443	EPHB1	-	0.46580255290815	0.638904359165812	-0.173101806257662	-8.90449011091913	6.83757687448909	5.25993748342073e-05	0.0182726627995652	-0.21929199402388	-0.126911618491444	0.0194398336234206
chr3:134784443	AC016931.1	-	0.46580255290815	0.638904359165812	-0.173101806257662	-8.90449011091913	6.83757687448909	5.25993748342073e-05	0.0182726627995652	-0.21929199402388	-0.126911618491444	0.0194398336234206
chr3:135114616	EPHB1	+	0.623176101984536	0.710757799389165	-0.0875816974046287	-4.92413496429083	10.6689473677033	0.0004966532916577	0.03777275931837	-0.126877595863498	-0.0482857989457594	0.0177862097687735
chr3:135114677	EPHB1	+	0.592533022533023	0.683172139420486	-0.0906391168874633	-5.09911527789648	9.37096593928088	0.000569409166155361	0.040033622287389	-0.130608653305063	-0.0506695804698638	0.0177754594567343
chr3:139031164	MRPS22	-	0.593661254145298	0.674455765008576	-0.0807945108632778	-5.42036443242965	8.12047820416324	0.00059934306923109	0.0406573203861642	-0.115078631044018	-0.0465103906825378	0.0149057340830978
chr3:139141885	MRPS22	+	0.579308524841063	0.659322101005671	-0.0800135761646076	-7.24506148826359	9.90674754153743	2.91732321373913e-05	0.0154144288054503	-0.104652303251757	-0.0553748490774577	0.0110438781360549
chr3:141542729	RASA2	-	0.600367946915262	0.686680469289165	-0.0863125223739034	-4.82463138266839	10.7351599255945	0.000570024194821774	0.0400368863887612	-0.125806929040227	-0.0468181157075801	0.0178899724202693
chr3:141986930	TFDP2	-	0.569109461966605	0.669993201243201	-0.100883739276596	-4.86342894965957	10.3134348864405	0.000601985142739293	0.0407347320863868	-0.146913080292986	-0.0548543982602072	0.0207433356836966
chr3:143515638	SLC9A9	-	0.64394485066754	0.865041961249392	-0.221097110581852	-4.75564762367563	10.5541420298903	0.00066628196619236	0.0423026700750536	-0.323954061815331	-0.118240159348373	0.0464914829856478
chr3:148244845	LINC02045	+	0.607575158011262	0.701286451206468	-0.0937112931952057	-7.88437526878001	10.8926944299614	7.96557613401257e-06	0.0105609337903018	-0.119903011684792	-0.0675195747056189	0.0118856967103376
chr3:14893415	FGD5	-	0.657294891200627	0.791502357291831	-0.134207466091203	-7.68768628203279	10.9866425713616	9.58835260040429e-06	0.0112036913395411	-0.172636773998164	-0.0957781581842427	0.0174574587421531
chr3:14905094	FGD5	-	0.645477514677369	0.728415242165242	-0.0829377274878735	-4.77272343103603	10.6093546690398	0.000639350140580497	0.0416880277627536	-0.121357746579833	-0.0445177083959139	0.0173774426040584
chr3:154317627	DHX36	+	0.598334729786343	0.69047619047619	-0.0921414606898477	-4.79304139752794	10.70720611328	0.000603546204208141	0.0407817031318981	-0.134594809209073	-0.0496881121706221	0.0192240068565589
chr3:155069426	MME	+	0.636598393978257	0.748952667111235	-0.112354273132978	-7.21706414925585	7.91241172447075	9.6062631743775e-05	0.021892345052709	-0.148323122205079	-0.0763854240608771	0.0155678639969638
chr3:155547784	PLCH1	-	0.624050731403673	0.738044001087479	-0.113993269683807	-5.28992807772351	9.84558820063188	0.000371374896142784	0.0338178336756707	-0.162109958215605	-0.065876581152009	0.0215491152259414
chr3:156854666	LEKR1	-	0.669376650181604	0.825728963612736	-0.156352313431132	-6.55743408931678	6.41030769597995	0.000458756203981668	0.0364867197202796	-0.213801925596852	-0.0989027012654113	0.0238435203925049
chr3:157898152	AC079943.2	+	0.337631052420968	0.188620254266806	0.149010798154162	7.80756497033686	7.22318223775203	9.02386001338569e-05	0.0214179329315352	0.104162050824788	0.193859545483537	0.0190854381257532
chr3:157985086	AC079943.2	-	0.613801229350598	0.733991491600187	-0.12019026224959	-6.15190531490372	9.39109461908288	0.000140886184005014	0.0247552736145208	-0.164107225410424	-0.0762732990887551	0.0195370793432751
chr3:163215291	AC128685.1	-	0.57256157635468	0.686589802264859	-0.11402822591018	-7.24697885253752	7.49947705069439	0.000121806930120242	0.0235501328518775	-0.150738122539757	-0.0773183292806024	0.0157345879200755
chr3:163215291	LINC01192	-	0.57256157635468	0.686589802264859	-0.11402822591018	-7.24697885253752	7.49947705069439	0.000121806930120242	0.0235501328518775	-0.150738122539757	-0.0773183292806024	0.0157345879200755
chr3:165029037	SI	+	0.552463362156457	0.650702075702076	-0.098238713545619	-4.8184377508026	9.84404761377643	0.000735976249453154	0.0439335501839936	-0.14376393580692	-0.0527134912843179	0.0203880839861956
chr3:165076973	SI	-	0.586976454684518	0.699498746867168	-0.11252229218265	-7.11957852764751	8.02406060113119	9.85739434867205e-05	0.0221114816557442	-0.148948816776257	-0.0760957675890434	0.0158046282860272
chr3:165333284	LINC01322	-	0.545161730179902	0.634376968061179	-0.0892152378812764	-4.98594562311962	9.47888237781762	0.000644562836207522	0.0417683890202665	-0.129383201757024	-0.0490472740055286	0.0178933435349935
chr3:165333415	LINC01322	-	0.653827502252761	0.736801646862623	-0.0829741446098612	-6.67624230515838	10.0462656691369	5.40468642984759e-05	0.018351795330547	-0.110648780185681	-0.0552995090340415	0.0124282703978182
chr3:165362360	LINC01322	-	0.624030381383323	0.707855562075511	-0.0838251806921884	-8.5414785776834	10.8936053118693	3.72411852876638e-06	0.00849411457417544	-0.10545118642958	-0.0621991749547964	0.00981389579448237
chr3:165734052	LINC01322	-	0.580649339319103	0.662600195503421	-0.0819508561843182	-6.8962181787171	10.3527379360288	3.53944850377143e-05	0.0164638018784361	-0.108307052343531	-0.0555946600251057	0.0118834488788699
chr3:168740638	EGFEM1P	-	0.609645781389479	0.701509492685963	-0.0918637112964844	-4.76317471362202	9.99924067781133	0.000765038582215857	0.0445403952917146	-0.134836565208897	-0.0488908573840721	0.0192862359286899
chr3:168767364	EGFEM1P	-	0.608572974644403	0.709096638655462	-0.100523664011059	-5.49305392115055	10.9297768687546	0.00019255515471629	0.0272448235278556	-0.1408335998563	-0.0602137281658177	0.0183001414976105
chr3:170666987	SLC7A14-AS1	-	0.641608479976459	0.812722462722463	-0.171113982746004	-7.43849698848948	6.7368738903596	0.000174642997136513	0.0263823954470518	-0.225943080355362	-0.116284885136646	0.0230038384112799
chr3:170666987	AC026316.4	-	0.641608479976459	0.812722462722463	-0.171113982746004	-7.43849698848948	6.7368738903596	0.000174642997136513	0.0263823954470518	-0.225943080355362	-0.116284885136646	0.0230038384112799
chr3:171946031	AC055714.1	-	0.476340652811241	0.686724705004275	-0.210384052193034	-6.82417125232267	9.1505370674357	7.10147571511967e-05	0.0199556037787579	-0.279950150842437	-0.14081795354363	0.0308292456935965
chr3:172772763	ECT2	-	0.659435312586573	0.807860487745545	-0.148425175158972	-4.56991480911061	10.9961340550485	0.00080421386694626	0.0454022310378057	-0.2199135146164	-0.0769368357015446	0.0324787619373278
chr3:172942107	SPATA16	+	0.522695454993592	0.309676147062459	0.213019307931133	5.99496627667068	9.46231188348136	0.000166501193254148	0.0259825571693178	0.133232707031647	0.292805908830618	0.0355330285609936
chr3:174606540	NAALADL2	+	0.645011292617185	0.744120115995116	-0.0991088233779309	-8.32430683797532	10.4817527498733	6.12812358788616e-06	0.00976215324778098	-0.125472600463625	-0.0727450462922367	0.0119059550911553
chr3:175079054	NAALADL2	-	0.635002035002035	0.724774124510967	-0.0897720895089316	-6.31330151831332	10.1291703348411	8.27375936192176e-05	0.0208214689409893	-0.121400464048892	-0.058143714968971	0.0142195156129523
chr3:175244780	NAALADL2	-	0.607062825130052	0.698373015873016	-0.0913101907429639	-7.90192069066701	10.5847914170257	9.29946392929307e-06	0.0111752596457105	-0.116865801849076	-0.0657545796368515	0.0115554425711727
chr3:175244780	NAALADL2-AS2	-	0.607062825130052	0.698373015873016	-0.0913101907429639	-7.90192069066701	10.5847914170257	9.29946392929307e-06	0.0111752596457105	-0.116865801849076	-0.0657545796368515	0.0115554425711727
chr3:176453113	LINC01208	-	0.64548233721166	0.749929379964546	-0.104447042752886	-5.53821989747625	8.11518227137181	0.000521705680630422	0.0385924927090521	-0.147829495173099	-0.0610645903326722	0.0188593166552455
chr3:177130248	TBL1XR1	+	0.515099053975657	0.612175324675325	-0.0970762706996674	-5.91195780010747	9.2277981333714	0.000204536221613341	0.0277224126712682	-0.13408231685987	-0.0600702245394643	0.0164203253781518
chr3:180857130	CCDC39	+	0.586292517006803	0.674688969423728	-0.0883964524169257	-4.86464736916996	10.0027403960589	0.000656319232088382	0.0420790660363157	-0.128882892875798	-0.0479100119580532	0.0181711942734317
chr3:180857130	AC108734.4	+	0.586292517006803	0.674688969423728	-0.0883964524169257	-4.86464736916996	10.0027403960589	0.000656319232088382	0.0420790660363157	-0.128882892875798	-0.0479100119580532	0.0181711942734317
chr3:182010206	LINC01206	+	0.432612437687626	0.24432261208577	0.188289825601856	5.10000352133104	8.37459057396567	0.000807107315541181	0.045418280705331	0.103811515432326	0.272768135771386	0.0369195481560598
chr3:182522302	LINC01995	+	0.621986051554538	0.720105015835398	-0.0981189642808599	-5.1660710955537	9.8991904988117	0.000435410558573973	0.0357049052635952	-0.140496397601264	-0.0557415309604561	0.0189929566330027
chr3:182522312	LINC01995	+	0.542645742801022	0.623735668489887	-0.0810899256888649	-6.6548900840083	8.75665499293371	0.000105854479995333	0.0226442219590107	-0.108771551149304	-0.0534083002284256	0.0121850135261774
chr3:183364748	MCF2L2	+	0.660681965259515	0.825613847165571	-0.164931881906056	-19.5404849443017	9.77426324226093	3.69350906401213e-09	0.000289585474264911	-0.183797576351249	-0.146066187460863	0.00844052142903201
chr3:185665097	IGF2BP2	+	0.630901505901506	0.713518518518518	-0.0826170126170125	-5.55173424396744	8.98131787704065	0.00035828465159492	0.0333181589520534	-0.116291525090685	-0.0489425001433397	0.0148812981649446
chr3:186203346	DGKG	+	0.664672232529375	0.750090913558406	-0.0854186810290304	-6.2155417430104	9.62320321557428	0.000117259362093409	0.0233700127224982	-0.116202749873319	-0.0546346121847415	0.0137427571981295
chr3:187008296	ST6GAL1	+	0.42809613660334	0.535976745439915	-0.107880608836575	-7.51226743422471	10.4322409100907	1.60103430872973e-05	0.0133168707750154	-0.139699205324627	-0.0760620123485224	0.0143605921622395
chr3:188582264	LPP	-	0.431361491765409	0.211462182146109	0.2198993096193	8.30893481376625	7.77991233862061	3.91115905695488e-05	0.0167349079731407	0.158568154725964	0.281230464512636	0.0264654031531178
chr3:189034114	TPRG1	+	0.664455782312925	0.754335122857131	-0.0898793405442061	-4.47586634132375	10.9716269685006	0.000943749053218052	0.0480477895503261	-0.134091011136257	-0.0456676699521554	0.0200808812618886
chr3:191443087	AC073365.1	+	0.581014223871367	0.669928804855275	-0.0889145809839087	-7.00788321428871	10.4388537237616	2.95021335038718e-05	0.015482041255802	-0.117024475568612	-0.0608046863992051	0.0126877943403247
chr3:192080437	AC026320.3	-	0.515805296477565	0.61614594555771	-0.100340649080145	-6.3377367153067	8.68806810973077	0.000157077679792097	0.0255086775817727	-0.136352669139538	-0.0643286290207521	0.0158322526774906
chr3:192111202	AC026320.3	+	0.643139598496741	0.747510745188764	-0.104371146692022	-6.56017631235944	9.58273957274352	7.79046950427924e-05	0.0204965097803925	-0.140030754465704	-0.0687115389183412	0.0159098081701533
chr3:193478041	ATP13A4	+	0.630294318684412	0.726012305790064	-0.0957179871056524	-5.17633548246619	9.54964238303537	0.00048153787863991	0.0372740216097052	-0.137184424259773	-0.0542515499515313	0.0184914574084076
chr3:193967339	LINC02026	+	0.653571078781163	0.569507101086048	0.0840639776951144	4.7525160463939	9.34092574988659	0.00093875383576822	0.0479595687012965	0.0442717582374601	0.123856197152769	0.0176883101234135
chr3:19602687	AC061958.1	+	0.556402327830899	0.688572478433159	-0.13217015060226	-6.66160126250823	10.4574154960068	4.54120406629288e-05	0.0174523356439402	-0.176117046817078	-0.0882232543874421	0.0198405976872436
chr3:20570511	SGO1-AS1	-	0.554302834261351	0.636851478695991	-0.0825486444346397	-6.16869746875176	10.9998170356796	7.01980070086232e-05	0.0198533750202524	-0.112001978954856	-0.0530953099144234	0.0133818597609624
chr3:20992840	SGO1-AS1	-	0.5	0.627312847335731	-0.127312847335731	-6.92649835196505	5	0.000962340570937291	0.0484293867599914	-0.174561554571981	-0.0800641400994801	0.0183805497188362
chr3:21841893	ZNF385D	-	0.649675029904838	0.786507537905009	-0.13683250800017	-11.4237534871093	9.71530054910033	6.00105015541746e-07	0.00489154299975712	-0.163627309983362	-0.110037706016978	0.0119778939693135
chr3:22292179	ZNF385D	-	0.587100190953574	0.695862663906142	-0.108762472952568	-6.27630671801629	7.44823129363403	0.000321117233554987	0.0321588928611373	-0.149244544941669	-0.0682804009634662	0.0173290563764773
chr3:24878387	AC092422.1	-	0.582715934858792	0.687202937376501	-0.104487002517709	-7.06513828525183	10.9771432122369	2.10829435549827e-05	0.0141012918250429	-0.137045852692219	-0.0719281523431987	0.0147890951739502
chr3:27193523	NEK10	-	0.617021680872613	0.697361158888507	-0.0803394780158941	-5.9705264165463	6.97382122211587	0.000566436678049879	0.0399625320612541	-0.112182120534602	-0.0484968354971865	0.013456012487148
chr3:31897805	OSBPL10	+	0.663730472426125	0.754811042419738	-0.0910805699936135	-4.77336167374991	9.17253736952543	0.000958477108537069	0.048343362288988	-0.134121366999877	-0.0480397729873503	0.0190810117101521
chr3:33369516	FBXL2	-	0.554036603493125	0.650921416546417	-0.0968848130532913	-7.53475363765128	10.9268656403155	1.19451875720929e-05	0.0121593773957677	-0.125209069977	-0.0685605561295822	0.0128583916226745
chr3:34138806	LINC01811	-	0.604307628798291	0.712359943977591	-0.1080523151793	-7.37863892113025	7.9829424145467	7.8627869389088e-05	0.0205463039342162	-0.141833855698633	-0.0742707746599674	0.0146439358714071
chr3:34218587	AC123023.1	-	0.632397959183673	0.781648719361848	-0.149250760178175	-5.85506438517488	10.5745019774095	0.000128736466131187	0.0240574566415466	-0.205632484934402	-0.0928690354219475	0.025490882825487
chr3:34218587	LINC01811	-	0.632397959183673	0.781648719361848	-0.149250760178175	-5.85506438517488	10.5745019774095	0.000128736466131187	0.0240574566415466	-0.205632484934402	-0.0928690354219475	0.025490882825487
chr3:37928600	CTDSPL	-	0.66014725728348	0.740337363015382	-0.0801901057319013	-4.88163069537822	10.1617169108273	0.000611251798558374	0.040990476955479	-0.116712739195822	-0.0436674722679803	0.0164269095177197
chr3:39826434	MYRIP	-	0.601500517242497	0.699759659242418	-0.0982591419999206	-4.98046062888332	10.9993014542957	0.000415216658101552	0.0351645951199578	-0.141682553052173	-0.0548357309476679	0.0197289265635559
chr3:41405756	ULK4	-	0.613849317746255	0.69561357968616	-0.0817642619399052	-6.03651996000231	10.8611408552587	8.93226189640467e-05	0.0213152405250913	-0.111623028118579	-0.0519054957612311	0.0135449335845274
chr3:42861212	KRBOX1	+	0.660007730364873	0.745320888262065	-0.0853131578971915	-5.19680829071069	8.91740879356868	0.000583507810201351	0.0403164747752349	-0.122502250748578	-0.0481240650458055	0.0164164527773112
chr3:42861212	AC092042.3	+	0.660007730364873	0.745320888262065	-0.0853131578971915	-5.19680829071069	8.91740879356868	0.000583507810201351	0.0403164747752349	-0.122502250748578	-0.0481240650458055	0.0164164527773112
chr3:42861212	CYP8B1	+	0.660007730364873	0.745320888262065	-0.0853131578971915	-5.19680829071069	8.91740879356868	0.000583507810201351	0.0403164747752349	-0.122502250748578	-0.0481240650458055	0.0164164527773112
chr3:42861212	ACKR2	+	0.660007730364873	0.745320888262065	-0.0853131578971915	-5.19680829071069	8.91740879356868	0.000583507810201351	0.0403164747752349	-0.122502250748578	-0.0481240650458055	0.0164164527773112
chr3:42861212	AC099329.2	+	0.660007730364873	0.745320888262065	-0.0853131578971915	-5.19680829071069	8.91740879356868	0.000583507810201351	0.0403164747752349	-0.122502250748578	-0.0481240650458055	0.0164164527773112
chr3:42967429	AC092042.3	-	0.674331270969926	0.820442842181973	-0.146111571212046	-7.01668685465288	6.86674838374651	0.000227795945166136	0.0287171552945011	-0.195545550165791	-0.0966775922583018	0.0208234419233284
chr3:43693841	ABHD5	-	0.661050958845076	0.762302512302512	-0.101251553457436	-6.63128435197703	7.22248627567302	0.00025798916333838	0.029903268135114	-0.137132212445052	-0.0653708944698195	0.0152687696806802
chr3:46650889	AC104304.3	+	0.441706988733742	0.557888245388245	-0.116181256654503	-6.30643272906419	10.4937318519998	7.1379599846358e-05	0.0199556037787579	-0.156969209240772	-0.0753933040682341	0.0184226585212054
chr3:49922821	MON1A	+	0.644514129762577	0.737225006961849	-0.0927108771992722	-6.05025947903513	6.28306590241016	0.000777681597916911	0.0447922527273097	-0.1298003261339	-0.0556214282646441	0.0153234547246323
chr3:50684904	DOCK3	-	0.633941688563537	0.737091503267974	-0.103149814704437	-6.07308250373279	10.9915725928037	8.06576007521054e-05	0.0206090607906728	-0.140536504331299	-0.0657631250775739	0.0169847543880782
chr3:50764069	DOCK3	-	0.670237145895041	0.752708978328173	-0.0824718324331327	-4.72777601502154	10.4559623210874	0.000714093267654925	0.0433714239044313	-0.121111198693153	-0.0438324661731129	0.0174441073712239
chr3:53684153	CACNA1D	+	0.420639571618121	0.521213282247765	-0.100573710629644	-5.53882225476412	10.0471611263582	0.000243774665634887	0.029288960871169	-0.141006438466574	-0.0601409827927138	0.0181579595812336
chr3:55022669	CACNA2D3	-	0.518456577102431	0.609770926362055	-0.0913143492596241	-6.5660319145666	8.11888499956926	0.000164359643970038	0.0258997313619813	-0.123302583263918	-0.0593261152553305	0.0139070827628853
chr3:55051059	CACNA2D3	-	0.544896715360439	0.647844932844933	-0.102948217484494	-4.53407772940857	10.5658488280023	0.000943342382068855	0.0480377917354062	-0.15317422702593	-0.0527222079430584	0.0227054372748751
chr3:55300330	LINC02030	-	0.587786909021982	0.672777768887609	-0.0849908598656266	-5.32747502922859	8.47135095881578	0.000582885671726386	0.0403081670416586	-0.121425989968787	-0.0485557297624661	0.0159533098511647
chr3:55877637	ERC2	-	0.613335077620792	0.729479892088588	-0.116144814467796	-5.44693562863985	7.64521775273547	0.000712886502609032	0.0433541038755946	-0.165715684514028	-0.0665739444215635	0.0213229643943485
chr3:58100475	FLNB	-	0.601512827353163	0.689832601357102	-0.0883197740039388	-4.44396360558499	10.8276413855	0.00102713660303808	0.0496255225896391	-0.132147476183272	-0.0444920718246059	0.0198740993047157
chr3:60666669	FHIT	-	0.600999374108618	0.711739241151006	-0.110739867042388	-5.30539862564377	9.76621805343565	0.000373318176787565	0.033863783478274	-0.157399276497384	-0.0640804575873925	0.0208730530646885
chr3:61085609	FHIT	-	0.651663152339075	0.762776052449965	-0.111112900110891	-5.823337993124	10.8538886365859	0.000121524782279325	0.0235324203467814	-0.153178139702618	-0.0690476605191632	0.0190806201257919
chr3:63045311	LINC00698	-	0.47406850459482	0.56083992497036	-0.0867714203755394	-5.44271841217999	6.83753101660529	0.00104175086038085	0.0499227803787914	-0.124652175802209	-0.0488906649488701	0.0159426620677928
chr3:64966927	ADAMTS9-AS2	-	0.562916126912809	0.643488680496353	-0.080572553583544	-5.43826298708559	10.4227963572426	0.000247021708806422	0.0294139661649712	-0.113403733959655	-0.0477413732074328	0.0148158619351219
chr3:65047758	ADAMTS9-AS2	-	0.610684699879073	0.690975292268396	-0.0802905923893225	-4.76814557832989	9.91161014183915	0.000778166994819345	0.0447922527273097	-0.117855526856463	-0.0427256579221818	0.0168389557471199
chr3:67846156	SUCLG2-AS1	-	0.554154113364045	0.653361344537815	-0.0992072311737706	-7.69901040773927	6.91161233758021	0.000124194202946869	0.0237047253305326	-0.129756267166511	-0.0686581951810301	0.0128857120486608
chr3:70406905	SAMMSON	+	0.573809116948215	0.658823529411765	-0.08501441246355	-4.60644683923725	10.2734506570523	0.000904447027231701	0.0473474278816956	-0.125988011858588	-0.0440408130685118	0.018455528833939
chr3:73032308	PPP4R2	-	0.581399247600029	0.663208442921798	-0.0818091953217696	-7.95312865959173	8.93483480965277	2.42035408973542e-05	0.0145288435894105	-0.105104582554758	-0.0585138080887806	0.0102864166824593
chr3:752760	LINC01266	-	0.646331168831169	0.806700244200244	-0.160369075369075	-5.09974485572151	10.9664106413775	0.000347506109358215	0.0330163556586756	-0.229608206634447	-0.0911299441037033	0.0314464899531501
chr3:76217582	ROBO2	+	0.627757163471449	0.708865793711331	-0.0811086302398822	-4.79979019954826	10.7884140397969	0.000584601221175696	0.0403185654944841	-0.118390882064651	-0.0438263784151132	0.0168983699011502
chr3:76611689	ROBO2	-	0.623724855387321	0.790008685697375	-0.166283830310054	-5.71850172096251	8.99800197709067	0.000287737888205095	0.0310114405000232	-0.232065552345536	-0.100502108274572	0.0290782163622513
chr3:79415879	AC117461.1	+	0.551487133194952	0.63961118702498	-0.0881240538300276	-4.90702934143555	10.9999996358128	0.000466376164013178	0.0367782012174161	-0.127650969610348	-0.0485971380497074	0.0179587379039896
chr3:79415879	ROBO1	+	0.551487133194952	0.63961118702498	-0.0881240538300276	-4.90702934143555	10.9999996358128	0.000466376164013178	0.0367782012174161	-0.127650969610348	-0.0485971380497074	0.0179587379039896
chr3:81012614	LINC02027	+	0.533452597822346	0.646043417366947	-0.112590819544601	-6.38275835142109	7.78214516404791	0.000239605250762837	0.0291535986444898	-0.153467424688965	-0.0717142144002378	0.0176398374097201
chr3:85156300	CADM2	+	0.64450437688424	0.746084730318813	-0.101580353434573	-5.47685654716355	10.8424424432492	0.00020300419848356	0.0276538731785786	-0.142474957211271	-0.0606857496578758	0.018547199942124
chr3:8665348	SSUH2	+	0.603259274311906	0.841027404966284	-0.237768130654379	-13.7485980925535	8.26650774549664	5.53229792921003e-07	0.00470335307141942	-0.277425454626757	-0.198110806682	0.0172939909257482
chr3:86968054	VGLL3	+	0.607124141522638	0.696834048688549	-0.0897099071659113	-10.9256488441433	10.0008039079884	7.01641145158038e-07	0.00526704839854885	-0.108004834495441	-0.0714149798363821	0.00821094549583665
chr3:9002757	SRGAP3	+	0.610527765884909	0.696440305400634	-0.085912539515725	-8.34567430483083	10.9478726053876	4.49833494254037e-06	0.00908543876784389	-0.108583221784535	-0.0632418572469153	0.0102942598018707
chr3:95099695	LINC00879	+	0.581971801805273	0.680914472702131	-0.0989426708968585	-5.43687467207917	10.1755363621392	0.000269222448415363	0.0303111606267563	-0.139396719614033	-0.0584886221796839	0.0181984461413051
chr3:98305704	AC117473.1	-	0.658819164029248	0.739031339031339	-0.080212175002091	-6.17060583202453	7.50774704907884	0.000346545343421881	0.0329950982997522	-0.110533673826191	-0.0498906761779911	0.0129990761337893
chr3:98893626	DCBLD2	+	0.547165032020713	0.629776368593573	-0.0826113365728595	-4.96998019399623	8.32674223105412	0.000970688364392324	0.0485974915330264	-0.120681652023178	-0.0445410211225407	0.0166220655512178
chr4:101866195	BANK1	+	0.65368199132661	0.745469795379051	-0.0917878040524412	-5.45326782121209	6.82230934319357	0.00103799256659965	0.0498278820828852	-0.131799576457394	-0.0517760316474881	0.0168317066136759
chr4:101884233	BANK1	-	0.637519936204147	0.717766062626744	-0.080246126422597	-5.37566852028469	9.56722631973296	0.000363005724077762	0.0334650965290117	-0.113712088017111	-0.0467801648280828	0.0149276552525131
chr4:104250737	AC004052.1	+	0.547853267180998	0.636277467659047	-0.0884242004780483	-5.77341881195783	9.46043625503364	0.00022185199350861	0.0284371537583012	-0.122815471619898	-0.0540329293361983	0.0153157432983911
chr4:104570106	CXXC4-AS1	+	0.640159252512194	0.723451519197882	-0.0832922666856885	-4.8466374525029	10.9099831869586	0.000525734853266727	0.0387645677309161	-0.121155581018365	-0.0454289523530116	0.0171855781460762
chr4:10656117	CLNK	+	0.560398248368173	0.678535724277709	-0.118137475909536	-7.54207341775763	6.98654132146526	0.00013382950893903	0.0243660325337414	-0.155190929441996	-0.0810840223770757	0.0156637928810642
chr4:106968457	DKK2	+	0.644399960941314	0.725940170940171	-0.0815402099988566	-4.78771539940078	8.89042777472929	0.00102514128260193	0.0496171211082126	-0.120139809425851	-0.0429406105718619	0.0170311313845142
chr4:118299507	PRSS12	+	0.590014549180134	0.674309879348639	-0.0842953301685051	-4.76702416396646	8.92120529907127	0.00104484855184795	0.0499799601741474	-0.124350996538077	-0.044239663798933	0.0176830087847438
chr4:118670523	METTL14-DT	+	0.637507730364873	0.758994708994709	-0.121486978629836	-7.65263406876551	10.5618744529415	1.26205423673336e-05	0.012370415290157	-0.156605678743651	-0.0863682785160209	0.0158751846146269
chr4:120179578	AC073475.1	+	0.650710294750542	0.743390178344412	-0.0926798835938693	-8.22156664216769	7.98637412149282	3.6211204426278e-05	0.0165705778401567	-0.118682674871844	-0.0666770923158947	0.011272776543405
chr4:122972953	SPATA5	-	0.635178585716343	0.729064641564642	-0.0938860558482985	-7.00762145056995	8.34810631584809	9.09046943211983e-05	0.0214605332811438	-0.12455840790104	-0.0632137037955568	0.0133977065557191
chr4:123569207	LINC01091	-	0.636602953738504	0.551013324910384	0.0855896288281199	5.4891521292096	9.5597798442825	0.000311742619997733	0.031849911062939	0.050629280208938	0.120549977447302	0.0155925044184272
chr4:123897931	LINC01091	+	0.634193150944588	0.726556776556777	-0.0923636256121881	-7.77154278832158	10.904745067736	9.05740038801678e-06	0.0111752596457105	-0.118549910819953	-0.0661773404044237	0.011884850682542
chr4:125329674	FAT4	-	0.605283124744151	0.710907258896974	-0.105624134152823	-8.54695609945693	10.3893481932462	5.09509797888122e-06	0.00958741189954093	-0.13302046018854	-0.078227808117106	0.0123580995296717
chr4:132081414	AC093916.1	-	0.609619503303714	0.690195729684746	-0.0805762263810322	-5.65390707900047	10.9795297370967	0.0001489927914047	0.0251037555785233	-0.111950535382124	-0.0492019173799408	0.0142514238835487
chr4:132219311	AC093916.1	-	0.551049372318097	0.650836296056884	-0.0997869237387872	-5.31574659361842	9.27522104415209	0.000437387660136877	0.0358004920033274	-0.14206071928719	-0.0575131281903844	0.0187719489598285
chr4:132895278	AC115622.1	+	0.52242030415405	0.616666666666667	-0.0942463625126164	-4.57758497149409	10.0044989188528	0.0010132015110677	0.0493904731446733	-0.140117970326644	-0.0483747546985891	0.0205886647871126
chr4:136248759	AC018680.1	-	0.394104308390023	0.480216850572888	-0.086112542182865	-4.97984229403195	10.9728520937682	0.0004186435003147	0.0352559382199025	-0.1241839595685	-0.0480411247972296	0.0172922227448981
chr4:137090477	LINC02511	+	0.646329452393526	0.726709709055247	-0.0803802566617212	-5.26856390575196	9.34759271195851	0.000454435775683088	0.0363521230654058	-0.114698390426515	-0.0460621228969278	0.0152565780921754
chr4:138003668	LINC00616	+	0.558996012197983	0.639444640092964	-0.0804486278949813	-5.04020486281028	10.8461631630913	0.000394566205301143	0.0345519637971795	-0.115640278396532	-0.0452569773934302	0.0159613805558938
chr4:138003668	AC097511.1	+	0.558996012197983	0.639444640092964	-0.0804486278949813	-5.04020486281028	10.8461631630913	0.000394566205301143	0.0345519637971795	-0.115640278396532	-0.0452569773934302	0.0159613805558938
chr4:138121416	SLC7A11-AS1	+	0.645490586352137	0.72954957465827	-0.0840589883061331	-6.2307882048488	10.477825846925	7.95700691777953e-05	0.0206031183755043	-0.113933822534236	-0.0541841540780306	0.013490907657673
chr4:138121416	LINC00616	+	0.645490586352137	0.72954957465827	-0.0840589883061331	-6.2307882048488	10.477825846925	7.95700691777953e-05	0.0206031183755043	-0.113933822534236	-0.0541841540780306	0.013490907657673
chr4:139329311	NAA15	-	0.663163470314751	0.803819059382977	-0.140655589068227	-6.59584800612361	6.80504335610425	0.000344764475177753	0.0329332449495132	-0.191375224581356	-0.089935953555097	0.0213248681500304
chr4:141164322	RNF150	+	0.651782684776758	0.741934094968351	-0.090151410191593	-7.1748894609886	9.98813249763189	3.03343043094268e-05	0.0156518122730343	-0.118152150295169	-0.0621506700880171	0.0125648500484593
chr4:142164878	INPP4B	-	0.591918785057883	0.692369370870121	-0.100450585812238	-5.71405828111168	8.26094649744159	0.000397337818461056	0.0346570422162877	-0.140767290432663	-0.0601338811918122	0.0175795521974786
chr4:142959007	AC104596.1	+	0.659595186036797	0.752434602434602	-0.0928394163978054	-9.65077220572856	9.06727571931167	4.55314312726679e-06	0.00908543876784389	-0.114576543101257	-0.0711022896943533	0.00961989511499372
chr4:144092120	AC107223.1	-	0.65096867418296	0.750865173473869	-0.0998964992909093	-7.28869680880898	10.6340885086018	1.88594099812191e-05	0.0136666101194708	-0.13018960942357	-0.0696033891582486	0.0137056735807938
chr4:144160434	AC107223.1	-	0.620538296290176	0.714219966828663	-0.0936816705384865	-5.03960486986092	8.7068492197466	0.000774677967940773	0.0447588543280019	-0.135949930067467	-0.0514134110095065	0.0185890904064215
chr4:144160434	AC098588.3	-	0.620538296290176	0.714219966828663	-0.0936816705384865	-5.03960486986092	8.7068492197466	0.000774677967940773	0.0447588543280019	-0.135949930067467	-0.0514134110095065	0.0185890904064215
chr4:14504238	LINC00504	-	0.631247082799878	0.735171321053674	-0.103924238253796	-5.23383962885007	8.88989205800779	0.000561182714516253	0.0398254780703698	-0.148927063747537	-0.058921412760055	0.0198562137213649
chr4:145700336	C4orf51	-	0.666077443122998	0.770456164922109	-0.104378721799111	-5.49379450208789	10.1271772896443	0.000252475992499779	0.0296751369010711	-0.146640041651053	-0.0621174019471694	0.0189993858997533
chr4:146816581	TTC29	+	0.414952028242127	0.498727588201272	-0.0837755599591455	-5.20048959439157	9.96909263075883	0.000405057005208313	0.0347715814927212	-0.119684112513166	-0.0478670074051251	0.0161091678847877
chr4:146925007	TTC29	-	0.619054544894881	0.711052462806849	-0.0919979179119678	-5.75490049588885	9.26932898136156	0.000245605938188814	0.029335158582113	-0.128001254157338	-0.0559945816665971	0.0159860136552645
chr4:149544784	IQCM	+	0.636128752200181	0.729127082068258	-0.0929983298680777	-6.14084277428516	10.1165770865189	0.000104378052489975	0.0225729755701724	-0.126689142864558	-0.0593075168715977	0.0151442291044332
chr4:150402086	LRBA	+	0.653966167359024	0.741366664845715	-0.0874004974866903	-6.00585311940558	10.529917592361	0.000106027913235558	0.0226442219590107	-0.119605774876706	-0.055195220096675	0.0145525532757852
chr4:153165058	TRIM2	-	0.66798768155911	0.824719321261874	-0.156731639702764	-7.66009759563978	6.06795736970817	0.00024496809873071	0.0293029436087209	-0.206661783640737	-0.106801495764791	0.0204607888797628
chr4:153752863	RNF175	+	0.614497144328692	0.730014703418105	-0.115517559089413	-6.62698518018752	7.77289166202535	0.000187349385252285	0.0270158815339617	-0.155919768238891	-0.0751153499399358	0.0174313893797096
chr4:153991899	AC079298.3	-	0.617083501294028	0.701826768003239	-0.084743266709211	-5.34489782034791	10.5319565165566	0.000273290094154968	0.0304589870154518	-0.119829995260739	-0.0496565381576832	0.0158549834922186
chr4:155516932	AC107208.1	-	0.339502053923306	0.165698479081261	0.173803574842045	8.04547105978144	5.46016570196914	0.000315128004012049	0.0319123635348798	0.119650718928629	0.22795643075546	0.0216026598754264
chr4:155699120	GUCY1A1	-	0.588558570004119	0.673728391565613	-0.0851698215614933	-7.85915579977268	10.3517028588789	1.11806010930751e-05	0.0119355876736945	-0.109205463885812	-0.0611341792371748	0.010837019106296
chr4:158549239	RXFP1	-	0.571302098372445	0.409996149031237	0.161305949341208	5.82067755416989	9.8869752610599	0.000175778420399022	0.0264229159094481	0.0994626751638515	0.223149223518565	0.0277125726068866
chr4:158642128	RXFP1	-	0.54887505241331	0.634108946608947	-0.0852338941956369	-5.77562339221037	10.9595822928974	0.000125411102632067	0.0237441543884568	-0.117729603678581	-0.0527381847126931	0.0147575228520946
chr4:161571138	FSTL5	+	0.596703681472589	0.706327092240405	-0.109623410767816	-5.27191593213429	8.80471966895958	0.000550906925279542	0.0395416443840469	-0.156821873804101	-0.0624249477315312	0.0207938465216451
chr4:163630489	MARCHF1	+	0.611249115030628	0.700320767195767	-0.0890716521651396	-5.80960881084379	10.6404720622177	0.000133994419896709	0.0243814214759707	-0.122956309888409	-0.0551869944418706	0.0153317813755179
chr4:163680189	MARCHF1	-	0.598212618380686	0.678956228956229	-0.0807436105755434	-5.6488183411079	8.50501300040817	0.000386216325868078	0.034375652960003	-0.113367797373374	-0.0481194237777127	0.0142938939969005
chr4:164272320	MARCHF1	+	0.537036054272896	0.627373436748437	-0.0903373824755404	-5.7994123836326	10.9096219224546	0.000123311394481718	0.0236705211765797	-0.124656788407238	-0.0560179765438432	0.0155769889257221
chr4:172639328	GALNTL6	-	0.57669922556083	0.667569921179761	-0.0908706956189314	-5.72361618697168	10.3350368267859	0.000169366094044064	0.0261145910044578	-0.126090798079812	-0.055650593158051	0.0158764481492967
chr4:173605931	HAND2-AS1	-	0.661870397017662	0.769356268086918	-0.107485871069256	-5.57223662544467	6.69018898379935	0.000981187849345715	0.0487976647269792	-0.153530082529383	-0.0614416596091296	0.0192895381682896
chr4:173730226	LINC02269	+	0.577994048333607	0.661654290259603	-0.0836602419259965	-5.66237412170956	8.53906172670698	0.000374391291879576	0.0339131706348453	-0.117360131409625	-0.0499603524423677	0.0147747641056148
chr4:174722639	GLRA3	-	0.649001801677609	0.73182566773898	-0.0828238660613716	-5.41544973436511	9.30544440619302	0.000378295039856393	0.0340395588432882	-0.117248948636224	-0.0483987834865195	0.0152939959050477
chr4:174745856	GLRA3	+	0.593602774443111	0.681735905420116	-0.0881331309770054	-4.5293859008676	10.9989746320191	0.000858899100772842	0.0464919658617555	-0.130960552611374	-0.0453057093426366	0.0194580750913989
chr4:174903289	ADAM29	-	0.631890048856378	0.714922537853814	-0.0830324889974364	-4.65160497797225	10.9998661728218	0.000703267584789026	0.043146052612304	-0.12232076653303	-0.0437442114618425	0.0178502881028458
chr4:176704159	VEGFC	-	0.631973657086439	0.730147058823529	-0.0981734017370903	-6.6280051360878	9.85236130075387	6.29633277692119e-05	0.019291848801749	-0.131243548182186	-0.0651032552919947	0.0148119079151827
chr4:176704159	AC093801.1	-	0.631973657086439	0.730147058823529	-0.0981734017370903	-6.6280051360878	9.85236130075387	6.29633277692119e-05	0.019291848801749	-0.131243548182186	-0.0651032552919947	0.0148119079151827
chr4:176983846	AC097518.2	+	0.661288711288711	0.765784410521253	-0.104495699232541	-5.25073317904831	10.5924819219322	0.000308469511978767	0.0317341042952994	-0.148504346491494	-0.0604870519735884	0.0199011634507547
chr4:179980314	AC108169.1	+	0.343048543528083	0.48525641025641	-0.142207866728327	-4.60103926584319	10.9426130560664	0.000774065679841575	0.0447491367199106	-0.210278963752519	-0.0741367697041356	0.0309077707256354
chr4:186418677	F11-AS1	-	0.600769781596849	0.680992534036012	-0.0802227524391631	-8.56377736202631	10.4029658821043	4.95998975153624e-06	0.00940844722668085	-0.100986176039386	-0.0594593288389402	0.00936768309681761
chr4:189953101	FRG1	+	0.558325253178194	0.451882716049383	0.106442537128812	4.99371762714759	10.710416586067	0.00044069460844315	0.0358952998582163	0.0593726764048759	0.153512397852748	0.0213152895450381
chr4:190022170	DUX4L9	+	0.535554027431592	0.453966488035808	0.0815875393957847	5.27808441043503	10.995042418288	0.000261444944104243	0.0299944515014306	0.0475632933634572	0.115611785428112	0.0154577935954344
chr4:20848718	KCNIP4	+	0.649062765191797	0.74781481755166	-0.0987520523598623	-5.86396100203903	9.18197262540669	0.000221610203461416	0.0284312866101931	-0.136733137599906	-0.0607709671198187	0.0168405029169744
chr4:22350275	ADGRA3	+	0.337538865178467	0.182381170106256	0.155157695072211	7.81531829606471	6.11186047653422	0.000211345829043757	0.0280036336224095	0.106793804623595	0.203521585520827	0.0198530231520242
chr4:23008194	AC097512.1	+	0.63261827458256	0.741303690260133	-0.108685415677573	-5.98404561078988	8.89980063365229	0.000215959195027828	0.0281988955490747	-0.149842537300835	-0.0675282940543105	0.0181625312951494
chr4:25536445	AC105290.1	-	0.649579831932773	0.371833721833722	0.277746110099051	8.35509288261074	8.62891999507455	2.02349561639665e-05	0.0139711284664976	0.202049961802979	0.353442258395123	0.0332427315891506
chr4:26341854	RBPJ	+	0.465167038475309	0.570058394067009	-0.1048913555917	-4.87206789091986	9.6617743216384	0.000717607836540699	0.0434672572084159	-0.153089832734783	-0.0566928784486169	0.0215291243759528
chr4:30814509	PCDH7	-	0.601107143976578	0.687109992939221	-0.0860028489626435	-7.1763422531461	8.57706597626165	6.66908177253377e-05	0.0195368371163416	-0.113318183973489	-0.0586875139517982	0.0119842178548466
chr4:33195860	AC093606.1	-	0.635331910541995	0.739486334431905	-0.104154423889911	-8.62345496296171	9.23597444810078	1.02342404415129e-05	0.0114085912384628	-0.131370803983347	-0.0769380437964746	0.0120780388298264
chr4:3334502	RGS12	-	0.614825390501927	0.717124542124542	-0.102299151622615	-6.48683318341253	8.09072029867403	0.00018155425613085	0.0267100360232191	-0.138594618033572	-0.0660036852116573	0.0157702763012626
chr4:34165885	LINC02484	+	0.454206041390915	0.54481591981592	-0.0906098784250045	-4.47521896126764	10.8657318952778	0.000967569940300589	0.0485529238247764	-0.135240561493923	-0.0459791953560861	0.0202470268402998
chr4:34165885	AC110790.1	+	0.454206041390915	0.54481591981592	-0.0906098784250045	-4.47521896126764	10.8657318952778	0.000967569940300589	0.0485529238247764	-0.135240561493923	-0.0459791953560861	0.0202470268402998
chr4:38659453	KLF3-AS1	+	0.499267638144241	0.418621776773951	0.0806458613702907	5.85891796821374	9.29974695278229	0.000212226340611445	0.0280228918146252	0.0496604145871294	0.111631308153452	0.0137646339832401
chr4:42190786	AC111006.1	-	0.482410454060167	0.562535600364548	-0.0801251463043812	-7.03784276243528	9.54332414065608	4.51078604300808e-05	0.017444594613869	-0.105657795577971	-0.0545924970307915	0.0113849014547543
chr4:43343971	AC097451.1	-	0.601210615916498	0.696203664143043	-0.0949930482265452	-6.39705845410711	10.4078201599636	6.563348011477e-05	0.0194173564278291	-0.127904875700716	-0.0620812207523739	0.0148494888561721
chr4:44353539	KCTD8	-	0.535825612296201	0.629316249194205	-0.0934906368980044	-7.3495289936883	9.02354397494551	4.26986488740299e-05	0.0170760844457794	-0.122255259469915	-0.0647260143260937	0.0127206297135903
chr4:46317557	GABRA2	+	0.646796536796537	0.739649011434328	-0.0928524746377917	-5.00383550023932	9.70093082108628	0.000585833777746665	0.0403225776075134	-0.134371829380682	-0.0513331198949018	0.0185562604193025
chr4:46740529	COX7B2	+	0.612682648817103	0.69472101972102	-0.0820383709039171	-4.887542812243	10.8583658696963	0.000499536519261333	0.0378454611422207	-0.119041219886603	-0.0450355219212314	0.016785197399891
chr4:4709123	STX18-AS1	-	0.619958590723739	0.771651825684084	-0.151693234960345	-6.51887720075476	6.50588925839867	0.000446184573791131	0.0360477639765556	-0.207576268368336	-0.0958102015523541	0.0232698408466387
chr4:56577678	THEGL	+	0.673260073260073	0.786177248677249	-0.112917175417175	-6.6751039250502	7.64792322247732	0.000191917239666733	0.0272153379043881	-0.15224073097048	-0.0735936198638713	0.0169161674012927
chr4:5766692	CRMP1	-	0.447548443619872	0.593686868686869	-0.146138425066997	-8.21223992795053	5.98085585305313	0.000178834237214007	0.026569548256282	-0.189715510709287	-0.102561339424706	0.0177951967245393
chr4:5766692	EVC	-	0.447548443619872	0.593686868686869	-0.146138425066997	-8.21223992795053	5.98085585305313	0.000178834237214007	0.026569548256282	-0.189715510709287	-0.102561339424706	0.0177951967245393
chr4:58832785	AC017091.1	-	0.547098089610657	0.629933261183261	-0.0828351715726043	-4.79762799932716	9.35012778286583	0.000877460329639486	0.046828522137737	-0.121671442996694	-0.043998900148515	0.0172658596256778
chr4:59016427	LINC02429	-	0.575853709782281	0.660873440285205	-0.0850197305029238	-5.36852699157709	10.8619205820191	0.00023738036539002	0.0290805371756921	-0.119930201151406	-0.0501092598544413	0.0158366961060855
chr4:62148065	ADGRL3-AS1	-	0.611514997848669	0.729462826445585	-0.117947828596916	-5.16476127104998	10.8616471463389	0.000323928783400431	0.0322241338945997	-0.168290026349415	-0.0676056308444163	0.0228370339705822
chr4:63479232	AC093730.1	+	0.644088209926719	0.735739588826999	-0.0916513789002794	-6.73206474618217	8.97737356237404	8.63891751913418e-05	0.0209782518890289	-0.122460575446995	-0.060842182353564	0.0136141558876504
chr4:63508997	AC093730.1	+	0.464646895547517	0.559282820187449	-0.0946359246399319	-5.36774219871132	10.6934183218304	0.000250771857162073	0.0295825062966333	-0.133576539328714	-0.05569530995115	0.017630489903679
chr4:65338452	EPHA5	-	0.487344735465036	0.595928363575422	-0.108583628110386	-8.61448075051917	8.02685996992704	2.50179005807292e-05	0.0145469088497408	-0.137633379634081	-0.079533876586691	0.0126047792380106
chr4:65368517	EPHA5	-	0.501548514142499	0.589408263305322	-0.087859749162823	-5.56035871031535	10.9959556841004	0.000170326478776273	0.0261869918318319	-0.122639282666447	-0.0530802156591986	0.0158010937315661
chr4:67830449	UBA6-AS1	+	0.337459449489525	0.246779066869811	0.0906803826197137	4.83274612412958	8.72201567846836	0.00101726676131648	0.0495117530251921	0.0480267397537917	0.133334025485636	0.0187637381088472
chr4:67830449	TMPRSS11D	+	0.337459449489525	0.246779066869811	0.0906803826197137	4.83274612412958	8.72201567846836	0.00101726676131648	0.0495117530251921	0.0480267397537917	0.133334025485636	0.0187637381088472
chr4:75334865	AC025244.1	+	0.638000563237569	0.734373789041308	-0.0963732258037394	-11.175593574915	8.54679926967709	2.16131366901884e-06	0.00756426701177495	-0.116039864684521	-0.0767065869229575	0.00862354425809303
chr4:78436905	FRAS1	+	0.604207580343572	0.711165845648604	-0.106958265305032	-5.9386170711164	10.5355490777307	0.00011618053515933	0.0233099379946414	-0.14681366387469	-0.0671028667353739	0.0180106351401648
chr4:79003152	LINC01088	-	0.589257369614512	0.698709150326797	-0.109451780712285	-6.24004881076224	8.16543898039281	0.000228117029309346	0.0287241258305684	-0.149757379372879	-0.0691461820516904	0.0175402122694157
chr4:80678283	CFAP299	-	0.575534302789942	0.670181795067379	-0.0946474922774367	-5.25443728588543	7.95896835188276	0.000782576626472263	0.0448988083131973	-0.136222547570022	-0.0530724369848513	0.0180128693383934
chr4:81036057	BMP3	-	0.671102706816993	0.752936507936508	-0.0818338011195153	-4.70828025860566	9.41146660325709	0.000980284959288637	0.0487798877357499	-0.120891481703429	-0.0427761205356018	0.0173808262517809
chr4:81659505	RASGEF1B	-	0.601601225285436	0.689583333333333	-0.0879821080478975	-4.95101174878968	9.11761585764373	0.000760324507447033	0.0444352810843455	-0.128102932301194	-0.0478612837946011	0.0177705310574966
chr4:87199415	KLHL8	+	0.606789220411511	0.69686570134846	-0.0900764809369485	-6.78541692591867	10.7863703687647	3.32111227818751e-05	0.0160954193847448	-0.11936533989527	-0.0607876219786267	0.013275010499779
chr4:87711444	AC093895.2	+	0.635716664288093	0.73134200585181	-0.0956253415637169	-5.42296816761451	10.7595065248683	0.00022604764721835	0.0286574077515128	-0.134542284935119	-0.056708398192315	0.0176333953303991
chr4:89700176	AC093866.1	-	0.641433566433566	0.726491985683162	-0.0850584192495958	-4.72342711761167	10.9552193467069	0.00063297229531803	0.0414790234597025	-0.124713043214859	-0.0454037952843326	0.0180077763733135
chr4:89700176	AC097478.4	-	0.641433566433566	0.726491985683162	-0.0850584192495958	-4.72342711761167	10.9552193467069	0.00063297229531803	0.0414790234597025	-0.124713043214859	-0.0454037952843326	0.0180077763733135
chr4:90264875	CCSER1	-	0.647527472527473	0.729287270463741	-0.0817597979362685	-5.50043338402108	9.49155905073848	0.000314901147827723	0.0319123635348798	-0.115121467929457	-0.0483981279430805	0.0148642465471508
chr4:91078774	CCSER1	+	0.634949443604233	0.721921992481203	-0.0869725488769703	-5.60628158638199	10.9792688483918	0.000159930219663666	0.0256253509416478	-0.121125203349273	-0.0528198944046677	0.0155134107227564
chr4:91275817	CCSER1	-	0.596372106154715	0.711374728084301	-0.115002621929586	-6.78344642173552	8.1947410907776	0.000125354383467619	0.0237397853940347	-0.153936155451921	-0.0760690884072506	0.0169534208394563
chr4:91443695	CCSER1	+	0.630121486578124	0.796276391979717	-0.166154905401593	-6.99023933780933	7.72908737408858	0.000134123953546052	0.0243861262459336	-0.221303832269571	-0.111005978533616	0.0237695588622956
chr4:93030258	GRID2	-	0.579820564589472	0.684490740740741	-0.104670176151269	-5.14685769251035	8.59712824481625	0.000699995888469638	0.0430955392265163	-0.151005754573203	-0.058334597729334	0.0203367146333934
chr4:93304834	GRID2	+	0.628894877789172	0.740585340585341	-0.111690462796168	-9.55319308237075	9.89772436356053	2.60568715337741e-06	0.00799419154118899	-0.137777119696099	-0.085603805896238	0.0116914273409044
chr4:93457705	GRID2	+	0.61059243584141	0.712147977470558	-0.101555541629148	-4.65571300072552	10.7864833351584	0.000735883965251888	0.0439335501839936	-0.149682059335084	-0.0534290239232122	0.0218131017984403
chr4:96496673	LINC02267	+	0.562285909508911	0.687117312117312	-0.124831402608401	-5.57860505778085	6.56850521838467	0.0010379222416656	0.0498278820828852	-0.178457010349503	-0.0712057948672997	0.0223768130770058
chr4:96578678	LINC02267	-	0.630192498286647	0.719711802001926	-0.0895193037152796	-7.49606088286094	8.40159738777941	5.36909075522106e-05	0.0183468765959512	-0.116830563409923	-0.0622080440206363	0.0119421793811677
chr4:96593474	LINC02267	-	0.612925170068027	0.525142839925449	0.0877823301425785	10.2225072475547	8.57344139417328	4.31050938778772e-06	0.00891978384707211	0.068208489130183	0.107356171154974	0.00858716242667146
chr4:98087445	STPG2	-	0.652354415450391	0.742350786468434	-0.0899963710180429	-5.2350479418238	10.8818849309301	0.000289031424620711	0.0310248220161287	-0.127883953252025	-0.0521087887840607	0.0171911264267601
chr4:99220897	AP002026.1	-	0.672072831709055	0.774373843104493	-0.102301011395439	-8.68364571134017	8.18431394572801	2.09106161879233e-05	0.0140875400148853	-0.129361650036391	-0.0752403727544861	0.011780882684083
chr5:102408649	SLCO6A1	+	0.629266555800602	0.731810666185666	-0.102544110385064	-5.64787095802568	10.2874279835766	0.000191752502997914	0.0271974427041071	-0.142846050804991	-0.0622421699651378	0.0181562417320014
chr5:104878282	AC099520.1	+	0.613230431857488	0.699794782068863	-0.0865643502113752	-7.61408005536042	9.74112123996044	2.10282127666225e-05	0.0141012918250429	-0.111987573956323	-0.0611411264664278	0.0113689834598512
chr5:114199576	KCNN2	-	0.593048330443288	0.687251984126984	-0.0942036536836958	-5.77816415774673	9.38407436066393	0.000227421307161661	0.0287171552945011	-0.130855660665298	-0.0575516467020938	0.0163033882582581
chr5:114448079	KCNN2	-	0.609098122007424	0.689120900076278	-0.0800227780688541	-8.75213858490285	10.8763848177689	2.97924458365923e-06	0.00826290179759327	-0.100174822502132	-0.0598707336355761	0.00914322565765706
chr5:118176675	LINC02147	+	0.334260452191487	0.567785110677268	-0.233524658485781	-13.127260260261	8.87333201230696	4.09468680544941e-07	0.00399705708189992	-0.273854570451061	-0.193194746520501	0.0177892914329359
chr5:118176675	LINC02208	+	0.334260452191487	0.567785110677268	-0.233524658485781	-13.127260260261	8.87333201230696	4.09468680544941e-07	0.00399705708189992	-0.273854570451061	-0.193194746520501	0.0177892914329359
chr5:122721440	LINC02201	+	0.621911767669018	0.747117902797235	-0.125206135128217	-6.09397632287265	6.41472269509771	0.000691115825108921	0.0429291826805223	-0.174702635785093	-0.0757096344713415	0.0205458847383897
chr5:123050776	AC106786.2	-	0.636115132551877	0.723178232651091	-0.0870631000992146	-6.81064417052962	10.5127972643996	3.65277537836519e-05	0.0166184793946662	-0.115359053699483	-0.0587671464989465	0.0127833869923708
chr5:124147868	LINC01170	-	0.614316859813754	0.725053677693746	-0.110736817879991	-6.71074956894553	6.03652209020206	0.000518609349585166	0.0384957584949613	-0.151055166130404	-0.0704184696295783	0.016501408187311
chr5:124514315	AC025465.1	-	0.613884989458982	0.697505177644802	-0.0836201881858197	-7.06366515909583	10.9678420687548	2.12181626543058e-05	0.0141247907590293	-0.109684936245891	-0.0575554401257485	0.0118380736207665
chr5:125218252	LINC02240	+	0.642889356699618	0.731897926634769	-0.089008569935151	-6.17459729650438	6.14279980065504	0.000758373409562884	0.0444079263193123	-0.124083682927507	-0.0539334569427955	0.0144152834040758
chr5:125462333	AC116362.1	-	0.544390765752995	0.633609446109446	-0.0892186803564513	-6.605804835959	10.5493707943786	4.68278923910747e-05	0.0175958392234221	-0.11910107434302	-0.0593362863698825	0.0135061029763982
chr5:125462333	LINC02240	-	0.544390765752995	0.633609446109446	-0.0892186803564513	-6.605804835959	10.5493707943786	4.68278923910747e-05	0.0175958392234221	-0.11910107434302	-0.0593362863698825	0.0135061029763982
chr5:125860191	AC116362.1	-	0.597528242066057	0.697001272768817	-0.0994730307027595	-7.92821184892465	7.7642192394564	5.5026743034409e-05	0.018383304267439	-0.12855946345489	-0.070386597950629	0.0125467170401421
chr5:127362654	MEGF10	-	0.337549474335189	0.566190969524303	-0.228641495189114	-5.89433292903726	9.41763213707866	0.000193034970758419	0.0272478958974029	-0.315801088051001	-0.141481902327227	0.038790054437332
chr5:128878360	SLC27A6	+	0.553800834914405	0.645309770950959	-0.0915089360365535	-5.09315569395952	7.82100518749486	0.00100534634663208	0.0492336685397339	-0.133106640621204	-0.0499112314519031	0.0179670407769162
chr5:12943300	LINC02220	+	0.670304912951972	0.772392617129459	-0.102087704177487	-6.72638301014311	10.0678725477778	5.02448364455992e-05	0.0179960594222746	-0.135873751277704	-0.0683016570772711	0.0151772065348559
chr5:129776836	AC008591.1	+	0.576482277121375	0.661091458981485	-0.0846091818601097	-6.45284327233899	8.12620045452793	0.000184711200182563	0.0268628787594441	-0.114763789517036	-0.054454574203183	0.0131119226500973
chr5:131747565	AC008695.1	+	0.367597565341926	0.280247266717518	0.0873502986244078	5.82365955537883	10.9139536299673	0.000118856294179035	0.0234306043658421	0.0543054745339697	0.120395122714846	0.0149992110276655
chr5:131747565	FNIP1	+	0.367597565341926	0.280247266717518	0.0873502986244078	5.82365955537883	10.9139536299673	0.000118856294179035	0.0234306043658421	0.0543054745339697	0.120395122714846	0.0149992110276655
chr5:131914316	MEIKIN	+	0.641336534613846	0.730888593669703	-0.0895520590558575	-5.25650299984787	8.73295958976262	0.000577337594669174	0.0402029104350367	-0.128271537413416	-0.0508325806982986	0.0170364325975747
chr5:131914316	AC034228.3	+	0.641336534613846	0.730888593669703	-0.0895520590558575	-5.25650299984787	8.73295958976262	0.000577337594669174	0.0402029104350367	-0.128271537413416	-0.0508325806982986	0.0170364325975747
chr5:133183465	AC010307.2	-	0.633726825290293	0.725396825396825	-0.0916700001065326	-6.47678879703526	10.1928881573792	6.50522528465421e-05	0.0193906719792088	-0.123125521727148	-0.0602144784859173	0.0141536188656475
chr5:138627113	CTNNA1	-	0.476078881436024	0.657904960536539	-0.181826079100515	-7.99459560560008	8.17426891260611	3.88367609130842e-05	0.0166999255252311	-0.234078981946902	-0.129573176254128	0.0227436243270578
chr5:140804250	PCDHA3	-	0.471659240016238	0.368344155844156	0.103315084172082	8.51383122118722	10.3062944345412	5.56976885808298e-06	0.00969589840442519	0.0763852130254365	0.130244955318728	0.0121349697319552
chr5:140804250	AC005609.5	-	0.471659240016238	0.368344155844156	0.103315084172082	8.51383122118722	10.3062944345412	5.56976885808298e-06	0.00969589840442519	0.0763852130254365	0.130244955318728	0.0121349697319552
chr5:140804250	PCDHA1	-	0.471659240016238	0.368344155844156	0.103315084172082	8.51383122118722	10.3062944345412	5.56976885808298e-06	0.00969589840442519	0.0763852130254365	0.130244955318728	0.0121349697319552
chr5:140804250	PCDHA2	-	0.471659240016238	0.368344155844156	0.103315084172082	8.51383122118722	10.3062944345412	5.56976885808298e-06	0.00969589840442519	0.0763852130254365	0.130244955318728	0.0121349697319552
chr5:140884962	PCDHA4	-	0.413481730484836	0.305988679363292	0.107493051121544	5.21514795354024	10.7435599100368	0.000310703213822063	0.0318158557952883	0.0619945462161088	0.152991556026979	0.0206116973246317
chr5:140884962	PCDHA2	-	0.413481730484836	0.305988679363292	0.107493051121544	5.21514795354024	10.7435599100368	0.000310703213822063	0.0318158557952883	0.0619945462161088	0.152991556026979	0.0206116973246317
chr5:140884962	PCDHA5	-	0.413481730484836	0.305988679363292	0.107493051121544	5.21514795354024	10.7435599100368	0.000310703213822063	0.0318158557952883	0.0619945462161088	0.152991556026979	0.0206116973246317
chr5:140884962	PCDHA3	-	0.413481730484836	0.305988679363292	0.107493051121544	5.21514795354024	10.7435599100368	0.000310703213822063	0.0318158557952883	0.0619945462161088	0.152991556026979	0.0206116973246317
chr5:140884962	PCDHA7	-	0.413481730484836	0.305988679363292	0.107493051121544	5.21514795354024	10.7435599100368	0.000310703213822063	0.0318158557952883	0.0619945462161088	0.152991556026979	0.0206116973246317
chr5:140884962	PCDHA6	-	0.413481730484836	0.305988679363292	0.107493051121544	5.21514795354024	10.7435599100368	0.000310703213822063	0.0318158557952883	0.0619945462161088	0.152991556026979	0.0206116973246317
chr5:140884962	PCDHA1	-	0.413481730484836	0.305988679363292	0.107493051121544	5.21514795354024	10.7435599100368	0.000310703213822063	0.0318158557952883	0.0619945462161088	0.152991556026979	0.0206116973246317
chr5:140884962	PCDHA11	-	0.413481730484836	0.305988679363292	0.107493051121544	5.21514795354024	10.7435599100368	0.000310703213822063	0.0318158557952883	0.0619945462161088	0.152991556026979	0.0206116973246317
chr5:140884962	PCDHA13	-	0.413481730484836	0.305988679363292	0.107493051121544	5.21514795354024	10.7435599100368	0.000310703213822063	0.0318158557952883	0.0619945462161088	0.152991556026979	0.0206116973246317
chr5:140884962	PCDHA9	-	0.413481730484836	0.305988679363292	0.107493051121544	5.21514795354024	10.7435599100368	0.000310703213822063	0.0318158557952883	0.0619945462161088	0.152991556026979	0.0206116973246317
chr5:140884962	PCDHA10	-	0.413481730484836	0.305988679363292	0.107493051121544	5.21514795354024	10.7435599100368	0.000310703213822063	0.0318158557952883	0.0619945462161088	0.152991556026979	0.0206116973246317
chr5:140884962	PCDHA8	-	0.413481730484836	0.305988679363292	0.107493051121544	5.21514795354024	10.7435599100368	0.000310703213822063	0.0318158557952883	0.0619945462161088	0.152991556026979	0.0206116973246317
chr5:140884962	PCDHA12	-	0.413481730484836	0.305988679363292	0.107493051121544	5.21514795354024	10.7435599100368	0.000310703213822063	0.0318158557952883	0.0619945462161088	0.152991556026979	0.0206116973246317
chr5:141131055	AC244517.2	+	0.48453491588503	0.568154013085555	-0.0836190972005244	-9.19919938188152	10.3011922169603	2.74129231376438e-06	0.00806647382892145	-0.103792502813126	-0.0634456915879232	0.00908982333454128
chr5:141906499	AC005740.5	+	0.606372879130203	0.694936944483224	-0.0885640653530205	-8.28155463979357	10.1283770250386	8.00825052765208e-06	0.0105609337903018	-0.112351208632297	-0.0647769220737436	0.0106941352445425
chr5:142704295	AC005592.1	-	0.471190714047857	0.577126876391582	-0.105936162343725	-4.61289283226859	10.0009808221488	0.000960724697300231	0.0483819720554663	-0.157105211776016	-0.0547671129114346	0.0229652337905337
chr5:144343495	KCTD16	-	0.617090083011866	0.703184611087837	-0.086094528075971	-5.42113311723836	10.9491809499743	0.000213241002612966	0.0280840472276769	-0.121068791700601	-0.0511202644513411	0.0158812791005267
chr5:144895073	AC132803.1	+	0.645615194509489	0.740468409586057	-0.0948532150765675	-5.29321646266768	9.38514791401001	0.000433597941718658	0.0356313684300805	-0.135138372375978	-0.0545680577771569	0.0179197687730237
chr5:144961706	AC132803.1	+	0.587363430220573	0.686126373626374	-0.0987629434058006	-5.0456133190833	10.1922182246361	0.000473867013287184	0.0370336858922253	-0.142265346011157	-0.0552605408004442	0.0195740214638057
chr5:145514975	PRELID2	+	0.623362970919362	0.70621168460604	-0.0828487136866781	-4.73381658649642	10.3668157260778	0.000724219676461412	0.043668102373958	-0.121658177894153	-0.044039249479203	0.0175014625456784
chr5:147560532	JAKMIP2-AS1	-	0.619383623894902	0.733148148148148	-0.113764524253246	-5.41944622030935	8.59832791684266	0.000493738207598808	0.0376930859656109	-0.161591840785697	-0.0659372077207955	0.0209919094365978
chr5:15178965	LINC02149	+	0.53525641025641	0.628257810301154	-0.0930014000447438	-5.45280929812816	9.45154344125925	0.000340825409235644	0.0328101415615271	-0.13130488075642	-0.0546979193330677	0.0170556854201135
chr5:152783757	LINC01470	+	0.590146361574933	0.682825727287871	-0.0926793657129381	-7.05259497036616	6.55276929769475	0.000273768726548765	0.0304589870154518	-0.124188441729387	-0.0611702896964894	0.0131411723064151
chr5:155015897	KIF4B	+	0.645238095238095	0.832230392156863	-0.186992296918768	-5.5697239769486	10.9937074254296	0.000168081907732511	0.0260383044923887	-0.260891114064126	-0.113093479773409	0.0335729917124568
chr5:160766011	ATP10B	+	0.631824115395544	0.778489077312607	-0.146664961917063	-9.1254905110374	9.09648977130828	7.08540775743228e-06	0.0100346862669303	-0.182963668401221	-0.110366255432905	0.0160720085939128
chr5:161505593	GABRB2	+	0.597541347541348	0.719437482595377	-0.12189613505403	-5.54574643799587	10.5597369514173	0.000201651649677903	0.0276152169037355	-0.170521266877976	-0.0732710032300832	0.02198011330249
chr5:161907576	LINC01202	+	0.47574373622967	0.645236299648064	-0.169492563418395	-8.1097690689005	10.1366158670871	9.60366941629636e-06	0.0112036913395411	-0.215975290956413	-0.123009835880376	0.0208998014590043
chr5:163245922	AC113414.1	-	0.567283380043403	0.687716071617871	-0.120432691574468	-4.6811070014516	10.9859205992801	0.000672658685703346	0.042419110640066	-0.177067162770708	-0.0637982203782275	0.025727395579106
chr5:164897554	AC109466.1	-	0.639355135993791	0.737737826243573	-0.0983826902497819	-9.50351529453235	10.0162514923551	2.49944407223226e-06	0.00787363936566791	-0.121443850942043	-0.0753215295575208	0.0103522420073743
chr5:165081966	AC109466.1	-	0.670841634646189	0.766173795693247	-0.0953321610470578	-6.37830677353388	10.9995409286537	5.23634325688163e-05	0.0182637843418767	-0.128228938769398	-0.0624353833247176	0.0149463116830048
chr5:167635307	TENM2	-	0.629766724503567	0.717100386756768	-0.0873336622532016	-7.79638257530135	10.7416081835617	9.62779416289157e-06	0.0112036913395411	-0.112061251642526	-0.0626060728638777	0.011201818459996
chr5:167717252	TENM2	-	0.644944644524476	0.748161438950913	-0.103216794426436	-5.42695970956332	9.54859621483228	0.000340666344907539	0.0328037795153973	-0.145867492018826	-0.0605660968340462	0.019019266762668
chr5:168875629	SLIT3	+	0.336211407639979	0.0874540774894328	0.248757330150546	5.51686218021902	10.8180778252189	0.000192808119004989	0.0272448235278556	0.149310106280644	0.348204554020449	0.0450903651431566
chr5:170940217	RANBP17	+	0.664536749482402	0.753030425790077	-0.0884936763076757	-6.91563443069767	6.53398227901945	0.000311095751325603	0.0318324756088593	-0.119194851915549	-0.0577925006998027	0.0127961761418248
chr5:171931309	FBXW11	+	0.561973593265057	0.454986959081787	0.106986634183271	5.38691006860958	9.44896756422277	0.00037300580753045	0.0338623837467022	0.0623824140869421	0.151590854279599	0.019860482692425
chr5:177379457	SLC34A1	-	0.509640712140712	0.616175856307435	-0.106535144166723	-5.19092597146757	10.7781151858409	0.00031903614419238	0.0321016203252889	-0.151820429945276	-0.0612498583881704	0.0205233410671437
chr5:178451902	COL23A1	+	0.598352419117567	0.708251766032086	-0.109899346914519	-7.58152322145357	10.0533319222405	1.82305407718212e-05	0.0136666101194708	-0.142174528562838	-0.0776241652662002	0.0144956816334131
chr5:179941207	RNF130	-	0.583615288220551	0.684182146542828	-0.100566858322276	-6.80344712351162	10.6591173459532	3.44150781588439e-05	0.016250957847986	-0.13322866637244	-0.0679050502721129	0.0147817505591737
chr5:19032256	AC106744.1	+	0.601234083376941	0.690377798716741	-0.0891437153398003	-6.6853984733344	10.7664129775628	3.82310771783484e-05	0.0166625219869005	-0.118569725793174	-0.0597177048864261	0.0133340915571991
chr5:19141675	AC106744.1	+	0.613566816206568	0.741083916083916	-0.127517099877348	-7.31759818541655	10.2448386337982	2.23358734072691e-05	0.0141893359179215	-0.166219427291187	-0.0888147724635093	0.0174260866265493
chr5:20037805	CDH18	+	0.586272842470322	0.687595366403486	-0.101322523933164	-4.69252760443941	10.4909664877036	0.000747755984182347	0.0441837877992389	-0.149129742665727	-0.0535153052006013	0.0215923128160838
chr5:20494163	CDH18	+	0.641849467059551	0.734313725490196	-0.092464258430645	-7.31190193438129	9.91710554302642	2.68368241664278e-05	0.0149815264454611	-0.120672633540334	-0.064255883320956	0.0126457191658806
chr5:20555882	CDH18	-	0.645765588383753	0.728857934180515	-0.0830923457967618	-6.54711762660548	10.9183658574815	4.30081805982627e-05	0.0171163724101347	-0.111051517894245	-0.0551331736992785	0.0126914392768965
chr5:24097761	C5orf17	-	0.608645924773071	0.694322381952968	-0.0856764571798964	-4.97278039382414	9.44549143157145	0.000663714357225494	0.0422706505350085	-0.124372935633133	-0.04697997872666	0.0172290852188648
chr5:24165704	C5orf17	-	0.584659773000109	0.697268884497145	-0.112609111497036	-6.21933898688877	9.03585390958073	0.00015263181206222	0.0252960601464541	-0.153543608022884	-0.0716746149711881	0.0181062829561842
chr5:24165704	AC114930.1	-	0.584659773000109	0.697268884497145	-0.112609111497036	-6.21933898688877	9.03585390958073	0.00015263181206222	0.0252960601464541	-0.153543608022884	-0.0716746149711881	0.0181062829561842
chr5:28923191	LINC02109	-	0.598545738395362	0.739301994301994	-0.140756255906632	-7.09418495232758	7.11868748685776	0.000179843016531614	0.0266156726028283	-0.187514836535478	-0.0939976752777855	0.0198410750287036
chr5:33543111	ADAMTS12	+	0.642334981966318	0.905606144093294	-0.263271162126976	-8.01613561862416	7.02790785607241	8.80754306857111e-05	0.0211677114987664	-0.340869223807795	-0.185673100446157	0.0328426532000418
chr5:33543184	ADAMTS12	+	0.661425439741114	0.935185185185185	-0.273759745444071	-7.60272610750054	5.90898545448682	0.000290035514080153	0.0310405711406324	-0.362198415655605	-0.185321075232538	0.0360081030900207
chr5:33778736	ADAMTS12	+	0.553955553513271	0.640731905917328	-0.0867763524040567	-7.73716968820543	7.30407372154899	9.03010813986851e-05	0.0214188338288723	-0.113074652835276	-0.0604780519728376	0.0112155162547797
chr5:351169	AHRR	+	0.651983924004384	0.732513802622498	-0.0805298786181139	-5.08030672264381	10.4984835883547	0.000410392733661938	0.0349797673768829	-0.115622956045384	-0.0454368011908441	0.0158513812284558
chr5:35951152	UGT3A1	-	0.623117281100474	0.706139122315593	-0.0830218412151185	-5.60058527967019	10.6126116691348	0.000182833574471928	0.0267711402474618	-0.115794655552518	-0.0502490268777193	0.0148237794925618
chr5:36049962	UGT3A2	-	0.628340320254166	0.728822615434671	-0.100482295180505	-4.9346298920803	9.06402345252127	0.000791445973943839	0.045091815251458	-0.146496330168159	-0.0544682601928504	0.0203626811692142
chr5:38274408	EGFLAM	+	0.573646244766934	0.707280692226929	-0.133634447459994	-7.39809899441117	7.03338016044523	0.000146194601404475	0.0249419795846341	-0.176306422119269	-0.0909624728007195	0.0180633494578739
chr5:41500999	PLCXD3	+	0.606088752517324	0.695959158517208	-0.0898704059998841	-5.53091947533516	8.61338343650315	0.000426769620221729	0.0354637892300983	-0.126880624701413	-0.0528601872983549	0.0162487279738308
chr5:43063613	AC025171.1	+	0.658857021069297	0.745501416941045	-0.0866443958717481	-4.59300199651772	10.8301006348505	0.000805513441371674	0.045417377323396	-0.128244349574012	-0.0450444421694842	0.018864436796988
chr5:45039787	AC114954.1	+	0.585720232148804	0.702741702741703	-0.117021470592899	-6.39168847333918	10.8922638480721	5.37547120437683e-05	0.0183468765959512	-0.157366628486179	-0.0766763126996195	0.018308381436457
chr5:4852826	AC106799.2	-	0.636093819678288	0.740958921410754	-0.104865101732466	-9.2922934238989	8.40827763037258	1.04852826071483e-05	0.0116333056485772	-0.130670429977242	-0.0790597734876905	0.0112851690049696
chr5:51617914	AC022433.1	-	0.436050997057862	0.570286576168929	-0.134235579111067	-6.39328522046102	10.4680569363723	6.42594767705114e-05	0.0193705409591816	-0.180736340978069	-0.0877348172440651	0.0209963382646312
chr5:5212527	ADAMTS16	-	0.603305023268726	0.686768735220748	-0.0834637119520221	-5.53332758294381	10.9926963216567	0.000177560216524048	0.026477747968501	-0.116665665225995	-0.0502617586780496	0.0150838190403356
chr5:53024119	ITGA2	+	0.635658464342675	0.763880534670008	-0.128222070327334	-8.23701654501222	8.19756139419365	3.06548592031886e-05	0.0156520561315789	-0.163968610695268	-0.0924755299593996	0.0155665670484754
chr5:57527338	AC025470.2	-	0.654433311786253	0.745445344129555	-0.0910120323433017	-4.57172857196298	10.6441808946031	0.000871626527198324	0.0467256844579191	-0.135007679399084	-0.0470163852875196	0.0199075756381188
chr5:59497597	PDE4D	+	0.625352868420095	0.73161075036075	-0.106257881940655	-5.95713632954081	8.4286586863314	0.00027663488409457	0.030584083081164	-0.14702895760261	-0.0654868062787003	0.017837074067574
chr5:60026982	PDE4D	-	0.621108443377351	0.730980094466937	-0.109871651089586	-6.29705656103231	9.97769303716877	9.030628844016e-05	0.0214188338288723	-0.148760217565257	-0.0709830846139138	0.017448096586824
chr5:60026982	AC034234.1	-	0.621108443377351	0.730980094466937	-0.109871651089586	-6.29705656103231	9.97769303716877	9.030628844016e-05	0.0214188338288723	-0.148760217565257	-0.0709830846139138	0.017448096586824
chr5:65233656	ADAMTS6	+	0.65124576146248	0.732904205453225	-0.0816584439907453	-5.2310489047046	10.2871140650524	0.000349723728887679	0.0330344282174118	-0.116309307446127	-0.0470075805353637	0.0156103384767259
chr5:67703728	AC112206.2	+	0.591660636773419	0.67948717948718	-0.0878265427137608	-7.0070275643724	8.85174161694838	6.81661571929896e-05	0.0197060468412291	-0.116253126376652	-0.05939995905087	0.0125340655373356
chr5:67703728	AC106798.1	+	0.591660636773419	0.67948717948718	-0.0878265427137608	-7.0070275643724	8.85174161694838	6.81661571929896e-05	0.0197060468412291	-0.116253126376652	-0.05939995905087	0.0125340655373356
chr5:74144587	LINC01331	+	0.631787573328927	0.733309990662932	-0.101522417334005	-5.04297055025071	9.07414228838318	0.000679679051390483	0.0426012904093021	-0.147006311463675	-0.0560385232043352	0.0201314713862364
chr5:74341033	LINC01333	-	0.652929268198507	0.822484456859457	-0.169555188660949	-4.71020097117079	9.50683307443518	0.000951060667917706	0.0481870966041581	-0.250330066512591	-0.0887803108093078	0.0359974425080219
chr5:74341033	LINC01331	-	0.652929268198507	0.822484456859457	-0.169555188660949	-4.71020097117079	9.50683307443518	0.000951060667917706	0.0481870966041581	-0.250330066512591	-0.0887803108093078	0.0359974425080219
chr5:7665908	ADCY2	-	0.632405339758281	0.715538214222425	-0.0831328744641437	-5.25899154199067	8.39632054898003	0.000654231292036509	0.0420406609376361	-0.119288295093639	-0.0469774538346487	0.0158077596817499
chr5:78711250	LHFPL2	+	0.629741290455576	0.733374183006536	-0.10363289255096	-6.86272482331974	7.45599192930113	0.000179424740770348	0.0265736757370984	-0.138902734438726	-0.0683630506631933	0.0151008375272184
chr5:78711250	AC008802.1	+	0.629741290455576	0.733374183006536	-0.10363289255096	-6.86272482331974	7.45599192930113	0.000179424740770348	0.0265736757370984	-0.138902734438726	-0.0683630506631933	0.0151008375272184
chr5:79137748	DMGDH	+	0.653612800757124	0.848946841688777	-0.195334040931654	-5.28299446132391	10.9278768501406	0.000264849687377067	0.0301188088883669	-0.276779095072626	-0.113888986790681	0.0369741142758464
chr5:82034890	ATG10	-	0.657583487940631	0.803492527615335	-0.145909039674704	-16.8358481693719	9.84024880621453	1.40249077822314e-08	0.000732595417692308	-0.165261936694292	-0.126556142655116	0.00866656899057477
chr5:82162166	ATG10	+	0.518362573099415	0.686124915103243	-0.167762342003828	-12.3250575238763	10.9697248061292	9.08439166946816e-08	0.00192320367008323	-0.197731110507522	-0.137793573500134	0.0136114855187358
chr5:8221358	AC091912.3	+	0.567741712069443	0.649043209876543	-0.0813014978071001	-5.0086716037546	8.01859708553174	0.00103425894196082	0.0497649494567153	-0.118717792273145	-0.0438852033410553	0.01623214781064
chr5:88782825	MEF2C	-	0.39352493788584	0.297606913455037	0.0959180244308029	5.20223539187508	10.0047033570838	0.000399392593981749	0.0346968972269464	0.0548385571132374	0.136997491748368	0.0184378478106948
chr5:90721360	ADGRV1	+	0.336120660385366	0.503239624352156	-0.16711896396679	-5.00276538856019	10.8876346906679	0.00041345828033573	0.0350964124482158	-0.240736256316258	-0.0935016716173224	0.0334053170570302
chr5:91716564	AC093298.2	-	0.593864629734195	0.682606670149774	-0.0887420404155786	-7.49222314434125	9.36168364846266	3.00162841809013e-05	0.0156083571761166	-0.115379311400264	-0.062104769430893	0.0118445538401514
chr5:92274496	AC114316.1	+	0.595453274229018	0.513730158730159	0.0817231154988592	4.85224695784276	10.2808384364998	0.000617946897166397	0.0411082034246787	0.0443345686859301	0.119111662311788	0.0168423240220222
chr5:92315827	AC114316.1	-	0.611950221011668	0.713425925925926	-0.101475704914258	-6.34492285640671	10.636629283879	6.37955775232001e-05	0.0193416583030989	-0.136823804747193	-0.0661276050813238	0.0159932133472347
chr5:96424760	PCSK1	+	0.593331367634773	0.680342560802331	-0.0870111931675577	-4.89946552505796	10.996381400134	0.000472474770835478	0.036970606724819	-0.1261007700072	-0.0479216163279154	0.0177593234859078
chr5:96424760	AC104123.1	+	0.593331367634773	0.680342560802331	-0.0870111931675577	-4.89946552505796	10.996381400134	0.000472474770835478	0.036970606724819	-0.1261007700072	-0.0479216163279154	0.0177593234859078
chr5:97397738	LIX1-AS1	-	0.611894816406095	0.692847487075176	-0.0809526706690813	-6.82378119761648	10.9663334110359	2.9064472501578e-05	0.0154144288054503	-0.107073435909344	-0.0548319054288183	0.0118633157079183
chr6:1047096	LINC01622	+	0.658415356573251	0.748401126234268	-0.0899857696610171	-6.09664714383494	9.14835576761959	0.000168252056183629	0.026046946174221	-0.123292578142239	-0.0566789611797954	0.0147598782639098
chr6:105416433	PREP	+	0.638112219800838	0.725717492384159	-0.0876052725833207	-7.22730936570251	6.9982349446117	0.000173509604558294	0.0263590562459969	-0.116269348456286	-0.0589411967103554	0.0121214228076433
chr6:105416433	AL096794.1	+	0.638112219800838	0.725717492384159	-0.0876052725833207	-7.22730936570251	6.9982349446117	0.000173509604558294	0.0263590562459969	-0.116269348456286	-0.0589411967103554	0.0121214228076433
chr6:106757114	LINC02532	-	0.645578231292517	0.752462121212121	-0.106883889919604	-4.63904304241331	10.2482918668647	0.000865300881671156	0.0465705581296641	-0.158052279884343	-0.0557154999548654	0.0230400729077955
chr6:110032029	AL590009.1	-	0.665908803839838	0.801023391812866	-0.135114587973027	-6.27576051022514	7.26340232470231	0.000356101900733262	0.0332247464452239	-0.185652115736853	-0.0845770602092012	0.0215295959354861
chr6:110784016	CDK19	+	0.65904580455664	0.7569124916951	-0.09786668713846	-6.34585348262662	8.73450684425866	0.000152071902087114	0.0252725521971834	-0.132916326614887	-0.0628170476620329	0.0154221472976637
chr6:110784051	CDK19	+	0.652647083452037	0.749492544492544	-0.0968454610405074	-6.45583023408243	10.614791392012	5.54745867147675e-05	0.0184010271529427	-0.130009746315527	-0.0636811757654881	0.0150012403562331
chr6:111778716	FYN	-	0.601275510204082	0.696119281045752	-0.0948437708416699	-5.1381934038615	10.9867810896795	0.000325388855028026	0.0322706626447928	-0.135476803299812	-0.054210738383528	0.0184585832776151
chr6:113815319	FO393415.3	+	0.666095527279738	0.769241037376049	-0.103145510096311	-5.53996893314391	10.9959932785803	0.000175608850417298	0.0264154855451593	-0.144126214648988	-0.0621648055436345	0.0186184275292996
chr6:123231995	TRDN	+	0.617905737428457	0.70692529935951	-0.0890195619310526	-6.85869257785589	10.766825059444	3.04575975738864e-05	0.0156518122730343	-0.117662000555914	-0.0603771233061916	0.0129790861626402
chr6:123388091	TRDN	+	0.612587412587413	0.702169571532317	-0.0895821589449041	-4.91150790674168	10.5874794127058	0.000518026987491514	0.0384795132911092	-0.129918112622746	-0.0492462052670616	0.0182392374492447
chr6:127060883	AL356534.1	+	0.635727018079959	0.758000101750102	-0.122273083670143	-6.33153099561781	10.1373071754512	8.05061434345182e-05	0.0206090607906728	-0.165223523609491	-0.079322643730794	0.0193117721061099
chr6:127166754	RSPO3	-	0.588543401043401	0.722498992235834	-0.133955591192433	-8.9705537440448	10.0746525560447	4.04567309540187e-06	0.00867710800812735	-0.167194580714632	-0.100716601670234	0.0149328118435678
chr6:127166754	AL356534.1	-	0.588543401043401	0.722498992235834	-0.133955591192433	-8.9705537440448	10.0746525560447	4.04567309540187e-06	0.00867710800812735	-0.167194580714632	-0.100716601670234	0.0149328118435678
chr6:128982367	LAMA2	-	0.524007936507937	0.617132422624413	-0.0931244861164769	-4.8904014968365	9.63938457541892	0.000703456749181802	0.043146052612304	-0.135769514084096	-0.0504794581488579	0.0190422987103855
chr6:129073821	LAMA2	-	0.646861471861472	0.739047680475699	-0.0921862086142272	-5.99033371987434	10.5074083178732	0.000109293699177329	0.0228717712983198	-0.126252268195138	-0.0581201490333165	0.0153891607588368
chr6:131036519	EPB41L2	+	0.594174358368732	0.680242752603434	-0.0860683942347019	-5.3505642225601	10.9986078747105	0.000233711272403479	0.0289261216340536	-0.121473666652912	-0.0506631218164921	0.0160858538753359
chr6:131731020	ENPP3	-	0.621097634960417	0.716698232323232	-0.0956005973628153	-4.85707608961415	10.9458947910658	0.000512226666660821	0.0382441079175969	-0.138948170602668	-0.0522530241229628	0.0196827464917088
chr6:13176380	PHACTR1	-	0.64539627039627	0.766815319756496	-0.121419049360226	-8.13702896100568	10.9534371952283	5.70913263635771e-06	0.00969589840442519	-0.154278732672505	-0.0885593660479463	0.0149217914723041
chr6:131846151	ENPP1	-	0.615862708719852	0.802463998419881	-0.186601289700029	-7.61654945552242	7.23038390264891	0.00010552240667982	0.0226391922886941	-0.244161182522277	-0.129041396877781	0.0244994522506163
chr6:133582818	TARID	+	0.563688692260121	0.691245483700727	-0.127556791440606	-6.81484952396079	9.12933426333408	7.25815941133957e-05	0.0200847502596886	-0.169807404158542	-0.0853061787226697	0.018717477325379
chr6:138176591	ARFGEF3	-	0.670190678152139	0.782487972161885	-0.112297294009747	-6.13942086473596	6.16710417723354	0.00077046329851492	0.0446582456501283	-0.156761882669076	-0.0678327053504167	0.0182911868210188
chr6:140026019	AL357146.1	-	0.623302386088535	0.727460232668566	-0.104157846580031	-6.78813501790602	8.85154650207992	8.67354531746243e-05	0.0210032846605614	-0.138957563796856	-0.0693581293632062	0.0153441035432087
chr6:14152374	AL133259.1	-	0.57089770690885	0.670131768815979	-0.0992340619071289	-5.06044751495901	10.6559133890769	0.000403884555064842	0.0347637538717368	-0.142565458867732	-0.0559026649465263	0.0196097403665954
chr6:146274984	GRM1	+	0.44451212459188	0.544114015976761	-0.0996018913848815	-5.33370443158626	9.8863605630273	0.00034425889103871	0.0329283652749692	-0.141275199510026	-0.0579285832597375	0.0186740552766737
chr6:146703440	ADGB	-	0.605435246198793	0.715572585309427	-0.110137339110634	-7.15461810128103	9.02419722017201	5.26652056134573e-05	0.0182756125902242	-0.14494648872961	-0.0753281894916591	0.015393880924394
chr6:147912928	AL033504.1	+	0.652873392271889	0.758031518133783	-0.105158125861895	-4.85312668114775	10.4406230720551	0.000590371242713636	0.0404352623296756	-0.153162938962632	-0.0571533127611568	0.0216681188789873
chr6:152081761	ESR1	+	0.639775805293047	0.741046258809417	-0.10127045351637	-6.66400031729934	10.9164901055723	3.67739306921199e-05	0.0166446264168916	-0.134749290019917	-0.067791617012823	0.0151966459625577
chr6:156141566	AL589693.1	-	0.58202947845805	0.669229110934729	-0.0871996324766788	-5.8132587687728	8.96880584824335	0.000258621494310031	0.0299265952996817	-0.121150281132213	-0.0532489838211448	0.0150001291779906
chr6:160895420	AL391361.2	+	0.63119825883801	0.740468073593074	-0.109269814755063	-6.75246968050259	10.8579526204098	3.3563281532632e-05	0.0161232981363424	-0.144943528228226	-0.0735961012819004	0.0161821999838924
chr6:162975678	PACRG	-	0.558266673266673	0.639032221075565	-0.0807655478088914	-6.26666862512903	9.49569492802637	0.000116469580165256	0.0233345568412182	-0.109690131974419	-0.051840963643364	0.0128881153034047
chr6:163270249	PACRG	+	0.656581082823319	0.831963099489722	-0.175382016666403	-4.70721500865141	10.9999997278038	0.000642594496643265	0.0417451735539053	-0.257386602495952	-0.0933774308368548	0.0372581274371509
chr6:163783294	AL078602.1	+	0.444554137444451	0.331944444444444	0.112609693000007	6.06846725958219	9.85752109662032	0.000128028534755023	0.0239764758753413	0.0711820189700101	0.154037367030004	0.0185565297105616
chr6:165446206	PDE10A	+	0.586495784916838	0.677435535479014	-0.0909397505621763	-5.50865046994585	7.80719777713389	0.000618028797996105	0.0411082034246787	-0.129172765016271	-0.052706736108082	0.0165085352679983
chr6:166239796	AL121956.1	+	0.34309416074122	0.208614043908162	0.134480116833058	8.26675063318646	9.50818372152384	1.21191900813331e-05	0.0122235411014084	0.0979779153584594	0.170982318307657	0.0162675908346859
chr6:169521618	AL031315.1	+	0.64525652782436	0.735631546815757	-0.0903750189913969	-5.48519095998051	8.75245078487677	0.000427291189716323	0.0354749206147761	-0.127808051900662	-0.052941986082132	0.0164761846307203
chr6:169521618	WDR27	+	0.64525652782436	0.735631546815757	-0.0903750189913969	-5.48519095998051	8.75245078487677	0.000427291189716323	0.0354749206147761	-0.127808051900662	-0.052941986082132	0.0164761846307203
chr6:17460253	CAP2	+	0.61422432343485	0.69832030587324	-0.0840959824383901	-5.20982959738999	10.9097479792395	0.000297932447089087	0.0314122081167487	-0.119659717194017	-0.0485322476827637	0.0161417913707812
chr6:19668041	LNC-LBCS	+	0.607967653464548	0.691943241943242	-0.083975588478694	-5.71959633318493	10.9935060972893	0.000134553963035353	0.0243941090142159	-0.116292964511475	-0.0516582124459126	0.0146820830679029
chr6:22792368	AL035401.1	-	0.593218193710233	0.675842035983419	-0.0826238422731866	-5.25036506995264	10.5576462016529	0.00031201667126517	0.031849911062939	-0.117438146999606	-0.0478095375467676	0.0157367804280955
chr6:24216484	DCDC2	+	0.602534347072162	0.696954418130889	-0.0944200710587265	-6.83077876978333	6.16964368370922	0.000429026217383961	0.0354927840674991	-0.128018930459373	-0.0608212116580796	0.0138227388473484
chr6:39919880	MOCS1	+	0.603514920056273	0.690845712022183	-0.0873307919659092	-5.60421156411259	8.19252068346293	0.000466431519534884	0.0367784562841656	-0.123118945641191	-0.0515426382906277	0.0155830648016833
chr6:46120974	AL035701.1	+	0.658403263403263	0.798366013071895	-0.139962749668632	-7.03541570191972	7.80783621966658	0.000122284033455471	0.0235847758222076	-0.186035734253677	-0.0938897650835875	0.0198940269628191
chr6:47804532	OPN5	+	0.654786316440452	0.761919849791703	-0.107133533351252	-6.55054373370596	10.8949168165764	4.32471160354848e-05	0.0171700004825467	-0.143172846274502	-0.071094220428001	0.0163549069674925
chr6:49799902	AL121974.1	+	0.615189485178708	0.71455836763206	-0.0993688824533521	-7.4697946818737	10.2548740528875	1.85492953395104e-05	0.0136666101194708	-0.128909724656403	-0.0698280402503006	0.0133027595382885
chr6:50014359	DEFB110	+	0.625860840161497	0.716956869486789	-0.091096029325292	-5.59909977935782	10.9455171924946	0.000163498699618096	0.0258688218288848	-0.126927296600567	-0.0552647620500166	0.0162697635182597
chr6:50738230	TFAP2D	-	0.51391346012089	0.609571436439253	-0.0956579763183621	-6.23754842597896	9.80232799723523	0.000105322883738944	0.0226216659575282	-0.129921966405543	-0.0613939862311813	0.0153358290446216
chr6:51702490	PKHD1	+	0.54025174172233	0.653176501860712	-0.112924760138382	-6.3591328754244	7.81373126095125	0.000241422217446455	0.0291805355272061	-0.154045062261057	-0.0718044580157076	0.0177578865468896
chr6:58229453	AL445250.1	-	0.61529777020561	0.722189253117841	-0.106891482912231	-4.87883063351946	10.6065706668616	0.000542103104321343	0.0392576892464892	-0.155332532756918	-0.058450433067544	0.0219092423864532
chr6:60450249	AC244258.1	+	0.594784623994525	0.68224128540305	-0.0874566614085247	-4.87281714512918	10.3769251155811	0.000582976266652502	0.0403081670416586	-0.127250971439272	-0.0476623513777778	0.0179478644085682
chr6:61749036	KHDRBS2	-	0.626539712875117	0.739399990160721	-0.112860277285605	-6.03542465227315	6.42549406750649	0.000724733250053388	0.043668102373958	-0.15789211827202	-0.06782843629919	0.0186996414979843
chr6:62068304	KHDRBS2	-	0.606446168210874	0.731279239766082	-0.124833071555208	-6.3530347100818	6.96550411071409	0.000391972709798564	0.0344683088811778	-0.171343113834175	-0.0783230292762401	0.0196493608569629
chr6:64096397	EYS	-	0.491478696741855	0.573809523809524	-0.0823308270676691	-7.68602441185614	8.40514043226202	4.44743499096919e-05	0.017377115598141	-0.106826462600397	-0.0578351915349416	0.0107117571654689
chr6:64100013	EYS	-	0.633411818648824	0.71464818059021	-0.0812363619413853	-6.10800834085912	9.07125015676406	0.000171827092904595	0.0262954506263609	-0.111287012645417	-0.0511857112373537	0.0132999756070993
chr6:67907404	AL713998.4	-	0.636307401327016	0.722346097234863	-0.086038695907847	-8.28684761371754	9.36773558680325	1.30283443752846e-05	0.0124909674818869	-0.109385883031016	-0.0626915087846781	0.0103825604039615
chr6:67907404	AL713998.3	-	0.636307401327016	0.722346097234863	-0.086038695907847	-8.28684761371754	9.36773558680325	1.30283443752846e-05	0.0124909674818869	-0.109385883031016	-0.0626915087846781	0.0103825604039615
chr6:68079239	AL646090.2	-	0.649648983627312	0.741240132416603	-0.0915911487892912	-4.99613458339521	10.4100378996854	0.00047852678610534	0.0371632455110545	-0.132221247025726	-0.0509610505528561	0.0183324022322571
chr6:69172536	ADGRB3	+	0.666648632697226	0.758363042186572	-0.0917144094893455	-5.18909202677521	10.9215159515325	0.000306525869448803	0.0316869882637718	-0.130649772125531	-0.0527790468531598	0.0176744619320891
chr6:71030005	AL096709.2	-	0.612779929252056	0.696446264892969	-0.0836663356409131	-5.60156681092887	9.87626096651043	0.000237801361374793	0.0291040750503355	-0.1170029534613	-0.0503297178205264	0.0149362381035386
chr6:74677557	AL356277.3	-	0.422507626532394	0.654510405053883	-0.232002778521489	-5.22286810158248	10.097353883256	0.000376169884511898	0.0339539475428929	-0.33084877880704	-0.133156778235938	0.044420570079339
chr6:74677557	AL357507.1	-	0.422507626532394	0.654510405053883	-0.232002778521489	-5.22286810158248	10.097353883256	0.000376169884511898	0.0339539475428929	-0.33084877880704	-0.133156778235938	0.044420570079339
chr6:75779789	MYO6	-	0.662196115288221	0.747813593203398	-0.0856174779151777	-8.5675179650358	7.21782123313789	4.91241670878041e-05	0.017879934097905	-0.109103997841385	-0.0621309579889702	0.00999326505816319
chr6:7755568	BMP6	-	0.616737153633188	0.698217999320941	-0.0814808456877522	-10.681920175045	5.88166363970831	4.52409647245109e-05	0.017444594613869	-0.10023710460557	-0.062724586769934	0.0076279212306891
chr6:7837489	BMP6	+	0.635773703420762	0.724709569818266	-0.0889358663975033	-5.68245091812065	8.46766121877724	0.00037678390840071	0.0339555444705409	-0.124683035028592	-0.0531886977664151	0.0156509695691163
chr6:79009132	PHIP	-	0.643577990636814	0.725356713385609	-0.0817787227487949	-4.96426074255219	10.2895061782741	0.00052008934693551	0.038519909084636	-0.118344450142313	-0.0452129953552768	0.0164734946429811
chr6:81516496	TENT5A	+	0.609206967811279	0.715954184704185	-0.106747216892906	-6.2885068034604	9.42631268093469	0.000117017706980044	0.0233583563408383	-0.144884160237672	-0.0686102735481392	0.0169749704069916
chr6:81948203	LINC02542	+	0.635778794276331	0.735544727636182	-0.0997659333598507	-5.34290140108202	8.6410716416353	0.000534990288040603	0.0390269690790376	-0.142275296177798	-0.057256570541903	0.0186726135989795
chr6:92101213	AL590814.2	-	0.647028461734344	0.559478557504873	0.0875499042294708	5.83506141986584	7.43192774887869	0.000513132643683507	0.0382672112688239	0.0524845712994022	0.122615237159539	0.0150041101420803
chr6:96497437	UFL1-AS1	-	0.621430917194464	0.709387092168202	-0.0879561749737376	-5.26131001202042	9.76154237992409	0.000397862211238225	0.0346684985708922	-0.125328890140897	-0.0505834598065781	0.0167175427360839
chr6:96604289	FHL5	-	0.617704477208349	0.760618919207748	-0.142914441999398	-6.77971227684214	7.8726368704108	0.000151527586771188	0.0252646618448489	-0.191661591213696	-0.0941672927851003	0.0210797208146369
chr6:96829757	GPR63	+	0.638038539933503	0.720492172105075	-0.0824536321715728	-8.89179242477013	7.92689575033635	2.14644512777766e-05	0.0141893359179215	-0.103871594181166	-0.0610356701619794	0.00927300461286964
chr6:97634552	AL589740.1	-	0.602538177742493	0.687898521231855	-0.0853603434893617	-6.42548777404658	7.55875142838701	0.000259515511522975	0.0299600827656975	-0.116308886226311	-0.054411800752412	0.0132846480284569
chr6:97877413	AL589740.1	-	0.601509010854986	0.68422619047619	-0.0827171796212044	-4.76348776708294	10.4451271177732	0.000677398165318687	0.0425225384204832	-0.121186103398482	-0.0442482558439265	0.0173648351094347
chr6:9813942	OFCC1	+	0.665395474091126	0.791993495699667	-0.126598021608541	-5.54672367850993	8.56195004338364	0.00042743526817548	0.0354749206147761	-0.178634824294	-0.0745612189230806	0.0228239279521041
chr6:98327442	AL589740.1	-	0.52907400641416	0.62954822954823	-0.10047422313407	-5.13766566393355	7.94219075734307	0.000907996872119894	0.0473992258714963	-0.145628553091861	-0.0553198931762785	0.0195563957848404
chr6:99940187	MCHR2	-	0.664252118150887	0.810552694704203	-0.146300576553316	-11.8208904126995	10.8164049796184	1.59833573486905e-07	0.00281960409068581	-0.173597462485829	-0.119003690620803	0.0123764430127988
chr7:10232714	AC004879.2	-	0.618297854923782	0.70838694617632	-0.0900890912525384	-6.89157435400034	6.13920159547394	0.000417346752373644	0.0352223987096252	-0.121900996859605	-0.0582771856454718	0.0130723527926887
chr7:103415612	SLC26A5	-	0.577310029195928	0.667138009049774	-0.0898279798538454	-4.5931569767186	10.664834013651	0.000838032370177039	0.0460808816219215	-0.133038082105507	-0.0466178776021833	0.0195569148429191
chr7:104435362	LHFPL3	-	0.584999447998018	0.685805990881989	-0.100806542883971	-7.54662237980031	10.919607167322	1.1817036709405e-05	0.0121081684879323	-0.130233371513956	-0.0713797142539868	0.0133578358384269
chr7:106645837	AC004917.1	+	0.619390532514905	0.735111015235917	-0.115720482721012	-6.14875316894719	9.15014559778082	0.000157706597005193	0.0255086775817727	-0.158188374977499	-0.0732525904645248	0.0188201541908416
chr7:110468109	AC073114.1	-	0.528358908172573	0.631907894736842	-0.103548986564269	-4.94041941470681	9.90594778938175	0.000603484849006557	0.0407814625003583	-0.15030995497633	-0.0567880181522081	0.0209595538095452
chr7:110745269	IMMP2L	+	0.652356884969667	0.830079438890181	-0.177722553920514	-4.90491630174858	8.60843694920838	0.000958619301659516	0.048343362288988	-0.260260411385152	-0.0951846964558748	0.0362335548635471
chr7:11454549	AC004160.1	-	0.605568032635702	0.700693360348092	-0.09512532771239	-4.76042597246714	10.9974230783467	0.000590082562194768	0.0404255251237189	-0.139107824568413	-0.0511428308563666	0.0199825243082376
chr7:11454549	THSD7A	-	0.605568032635702	0.700693360348092	-0.09512532771239	-4.76042597246714	10.9974230783467	0.000590082562194768	0.0404255251237189	-0.139107824568413	-0.0511428308563666	0.0199825243082376
chr7:116057733	TFEC	+	0.6071521393526	0.705375675236356	-0.0982235358837562	-8.90498865852462	7.61886673454662	2.72301213075657e-05	0.0150629648151107	-0.123882345231933	-0.0725647265355798	0.011030169677951
chr7:116064644	TFEC	+	0.636030552571906	0.717915986437995	-0.0818854338660887	-7.43171779346255	10.1879434868034	2.01224842280907e-05	0.0139617789167048	-0.106374645991787	-0.0573962217403902	0.0110183723523679
chr7:119679945	LINC02476	+	0.610746555032269	0.69213302378625	-0.0813864687539801	-5.32460167127707	10.4261629744603	0.000291417635573436	0.0310937492154817	-0.115255790494184	-0.0475171470137759	0.0152849872682514
chr7:122783992	CADPS2	-	0.662923542622791	0.752636905578082	-0.0897133629552913	-5.99767742298992	7.96492487344631	0.000329870897625045	0.0323559147686473	-0.124233070577988	-0.0551936553325943	0.0149580173504176
chr7:124326041	AC006148.1	+	0.623204573204573	0.716244472537379	-0.0930398993328054	-5.23954688265529	10.2356613686191	0.000351121456069542	0.0330483644996174	-0.13248236924316	-0.0535974294224511	0.0177572414975042
chr7:12500457	AC013470.2	+	0.569910437859354	0.482994628350666	0.0869158095086887	4.56024576121034	10.2860697259852	0.000969075823299274	0.0485823707575603	0.0446082411628412	0.129223377854536	0.019059457331883
chr7:125267748	POT1-AS1	+	0.626573765397727	0.724970291146762	-0.0983965257490342	-5.05275944735447	9.75877095669185	0.000536122926382122	0.0390717446848497	-0.141932726076949	-0.0548603254211197	0.019473819558252
chr7:126622744	GRM8	-	0.635315844736455	0.724356767878776	-0.0890409231423211	-6.20008837652732	10.3927298372176	8.5925281625925e-05	0.0209782518890289	-0.120876597224161	-0.0572052490604816	0.0143612345074657
chr7:126708817	GRM8	+	0.605737959519472	0.722039072039072	-0.1163011125196	-7.3752931282985	9.14749694382104	3.86215744386256e-05	0.0166887536307407	-0.151885617634729	-0.0807166074044704	0.0157690156169333
chr7:126834852	GRM8	+	0.569647999059764	0.701617826617827	-0.131969827558063	-5.03575684923484	9.79186608254587	0.00054375624455136	0.0392846767302139	-0.190530342061927	-0.0734093130541983	0.0262065527604088
chr7:127004571	GRM8	+	0.595552261785217	0.681277904849667	-0.0857256430644494	-6.09610054678729	9.92889293523058	0.000119816601206147	0.0235025771221701	-0.117089006942299	-0.0543622791865995	0.0140623735462545
chr7:12986112	AC011287.1	+	0.412882042769261	0.499242424242424	-0.0863603814731634	-4.70506633100802	10.9995722574998	0.00064490047186437	0.0417702552080994	-0.12675913602715	-0.0459616269191767	0.0183547638646492
chr7:130088572	KLHDC10	-	0.641587604941642	0.725849673202614	-0.0842620682609722	-4.96604695279727	10.7507472817495	0.000454867120228685	0.0363623156658625	-0.121713489922549	-0.046810646599395	0.0169676342293762
chr7:130827327	AC016831.6	-	0.586387069596847	0.681076469276809	-0.0946893996799616	-8.86764264342997	10.6737216266959	2.99943954901187e-06	0.00826290179759327	-0.118279646336579	-0.0710991530233443	0.0106780802392975
chr7:132991671	CHCHD3	-	0.620384294068505	0.705521449603927	-0.0851371555354223	-8.84135636056407	10.3760155665201	3.76046048739911e-06	0.00849411457417544	-0.106487918199816	-0.0637863928710287	0.00962942246227826
chr7:134221661	LRGUK	-	0.66089708610717	0.748663101604278	-0.0877660154971079	-9.27761933454555	9.65822530076478	4.04282764333006e-06	0.00867710800812735	-0.108945688847351	-0.0665863421468652	0.00945997160826679
chr7:13429549	AC011287.1	+	0.630464997964998	0.721674201301807	-0.0912092033368088	-4.81555539420266	10.9301846359462	0.000549517111831956	0.0394932911682923	-0.132929553796159	-0.0494888528774588	0.0189405366298171
chr7:134567351	AKR1B15	-	0.56859112065879	0.658835200746965	-0.0902440800881756	-5.4195190737532	10.6094881478	0.000238624624141224	0.0291472854211609	-0.127059435124307	-0.0534287250520444	0.0166516768111822
chr7:136773749	AC009264.1	+	0.644409937888199	0.730885327644301	-0.0864753897561022	-7.5561985600548	7.61819922844528	8.49014107801875e-05	0.0209346662304399	-0.113097990205196	-0.0598527893070085	0.0114442982233483
chr7:14280377	DGKB	+	0.60722417171997	0.688866326909805	-0.0816421551898352	-6.92036719425375	10.9057592463238	2.63296857740191e-05	0.0148802519843449	-0.107635400837478	-0.0556489095421926	0.0117973733037787
chr7:144738844	TPK1	+	0.461523820997933	0.371185796376798	0.0903380246211352	10.0182673346356	10.7408565776637	8.81943659264092e-07	0.0056575483091347	0.0704324357545476	0.110243613487723	0.00901733020327925
chr7:146528854	CNTNAP2	+	0.373715851864278	0.460846683864587	-0.087130832000309	-4.78600147446673	9.94502530412621	0.000750532806474851	0.0442441129657947	-0.127725294582409	-0.046536369418209	0.0182053500119361
chr7:146856942	CNTNAP2	+	0.653887392277485	0.734663456025685	-0.0807760637481999	-5.96031107820814	8.27743976836188	0.000295910234166613	0.0313434725801046	-0.111846384822869	-0.0497057426735307	0.0135523234757881
chr7:146942363	CNTNAP2	+	0.635546596260882	0.726180033416876	-0.0906334371559936	-9.48383531114575	10.9541130619898	1.29320345794786e-06	0.00656496130970531	-0.111678177374542	-0.0695886969374453	0.0095566228411282
chr7:14791020	DGKB	-	0.599463469598366	0.712917692329457	-0.113454222731091	-6.61482055597739	9.91450487917958	6.21302350762228e-05	0.0192286265035134	-0.151714905858815	-0.0751935396033677	0.017151519345233
chr7:147957565	CNTNAP2	+	0.635465478986057	0.717114898989899	-0.0816494200038416	-6.11728204964643	8.82903037297743	0.000189984184764326	0.027127348232842	-0.111932554656814	-0.0513662853508692	0.0133473361766212
chr7:152318877	KMT2C	+	0.650456747685812	0.732631992190816	-0.082175244505004	-12.0633827798142	8.50341102615261	1.2180519331989e-06	0.00641090075534272	-0.097723237080152	-0.066627251929856	0.00681195697798041
chr7:156477434	LINC01006	+	0.600440925941828	0.690605073938407	-0.0901641479965798	-4.96854637885613	8.71191272047571	0.000850054411676005	0.0463164386448781	-0.131423350434194	-0.048904945558966	0.0181469872919527
chr7:158181694	PTPRN2	-	0.600424412189118	0.688160866910867	-0.0877364547217487	-4.72541774740788	9.96480759350534	0.000817629767384311	0.0456624397197891	-0.129125943947702	-0.0463469654957951	0.0185669203045332
chr7:17115373	AHR	-	0.679071628651461	0.770451001240475	-0.0913793725890144	-9.29073727934951	10.3376536272091	2.43642142517171e-06	0.00774425329887856	-0.113197671682176	-0.0695610734958529	0.00983553509710398
chr7:17115373	AC073332.1	-	0.679071628651461	0.770451001240475	-0.0913793725890144	-9.29073727934951	10.3376536272091	2.43642142517171e-06	0.00774425329887856	-0.113197671682176	-0.0695610734958529	0.00983553509710398
chr7:18509775	HDAC9	-	0.594422551629347	0.676699974861739	-0.0822774232323921	-6.84722884256432	10.9995275803701	2.774943869533e-05	0.0151545365752945	-0.108724959986589	-0.0558298864781947	0.0120161637830668
chr7:20956158	LINC01162	+	0.660212954747116	0.766750841750842	-0.106537887003725	-5.46932025549685	9.74230472558949	0.00029965066274158	0.0314768087819414	-0.15009632999004	-0.0629794440174112	0.0194791824261253
chr7:21652199	DNAH11	+	0.63057481365752	0.732822818736131	-0.102248005078611	-4.92305404468336	9.97738100772959	0.00060615396118576	0.0408437921499459	-0.148538941176931	-0.055957068980291	0.0207692225497775
chr7:24597436	MPP6	+	0.645327977344784	0.824114570070452	-0.178786592725668	-7.09012339649503	7.31396150411077	0.000158774283619625	0.0255616453620657	-0.237898670210281	-0.119674515241055	0.0252162878877469
chr7:25445583	AC005100.2	-	0.657291280148423	0.73966709577915	-0.0823758156307272	-5.43968232640758	7.25875278901244	0.000856111918587786	0.0464593168850565	-0.117927350811331	-0.0468242804501231	0.0151434974852895
chr7:25461173	AC005100.2	-	0.634915965267049	0.727705801981164	-0.0927898367141151	-6.29231126407377	10.9960125123551	5.90995698426563e-05	0.0188458115741808	-0.125248194405196	-0.0603314790230342	0.0147465426963067
chr7:26769102	SKAP2	-	0.63614630983052	0.719345238095238	-0.0831989282647178	-5.92978536354161	10.5106288820845	0.000118754631093268	0.0234306043658421	-0.114256582257894	-0.0521412742715414	0.0140306812412223
chr7:28227486	JAZF1-AS1	-	0.603308171094525	0.389704913764054	0.213603257330471	8.61189358010576	7.11745841004735	5.15262645200055e-05	0.018159858947583	0.155148447856956	0.272058066803986	0.0248032857516857
chr7:28713971	CREB5	-	0.589854381207765	0.693918703845174	-0.10406432263741	-5.84602505435541	9.5021117700094	0.000198413763309489	0.0274688352132187	-0.144010644277374	-0.0641180009974459	0.0178008683968741
chr7:32392222	PDE1C	+	0.594183582523919	0.675548884093776	-0.0813653015698571	-5.1042263328821	10.8678694813095	0.000355024105309159	0.0331855123548084	-0.116502815135948	-0.0462277880037665	0.0159407706993107
chr7:3361504	SDK1	-	0.605534398767481	0.695253542244871	-0.0897191434773895	-5.02530648117656	8.31957597296433	0.000906276630260082	0.0473704081476721	-0.130615657132284	-0.0488226298224947	0.0178534670101124
chr7:3415322	SDK1	+	0.595008609167198	0.680303064312886	-0.0852944551456879	-4.92588453498703	9.91785265892175	0.000614368757716065	0.0410065118870976	-0.123919289808068	-0.0466696204833083	0.0173155612032454
chr7:34516460	NPSR1-AS1	+	0.626993121174226	0.732955917874396	-0.10596279670017	-5.62837292286901	8.82061752925183	0.000346910342316313	0.0329993751548122	-0.14868378519933	-0.0632418082010095	0.018826541551578
chr7:35153298	DPY19L2P1	+	0.60987886915214	0.705360999154103	-0.0954821300019626	-6.00152262801353	9.15555544596615	0.00018864712662924	0.0270690134681022	-0.131379264464298	-0.0595849955396271	0.0159096509202976
chr7:3563786	SDK1	+	0.629249130013748	0.726688928263141	-0.0974397982493934	-6.26297584046204	7.18744567751524	0.000376409955642371	0.0339539475428929	-0.134035175484848	-0.0608444210139394	0.0155580670804895
chr7:3564389	SDK1	+	0.567941770009439	0.649975643959564	-0.0820338739501252	-6.36789482397423	8.79623046987017	0.000143783611441131	0.0248648655644929	-0.111279158247134	-0.0527885896531167	0.0128824165941434
chr7:36677024	AOAH	+	0.570893580104106	0.466544117647059	0.104349462457048	5.41401208113465	9.25420593640366	0.000386304719110965	0.0343788788586033	0.0609306191979905	0.147768305716105	0.0192739618776725
chr7:36781651	AC007349.3	-	0.65995074265751	0.746240079365079	-0.0862893367075699	-5.89394964579357	10.3501633390397	0.000132776808246449	0.0243040111769087	-0.118761037048373	-0.0538176363667668	0.0146403247216666
chr7:38402044	AMPH	-	0.597569892286712	0.778571428571429	-0.181001536284717	-7.57605310516517	8.22023302652062	5.57956959198196e-05	0.018432438894044	-0.235839035596754	-0.12616403697268	0.0238912707939329
chr7:38437547	AMPH	+	0.657377344877345	0.925396825396825	-0.268019480519481	-7.27813053486823	5.72306973178853	0.000424314130198084	0.0353788138086169	-0.359195342800024	-0.176843618238937	0.0368253192540924
chr7:38478763	AMPH	+	0.338517732267732	0.190453277650375	0.148064454617358	6.32147258562713	6.61305737350831	0.000498311267597378	0.0378284369771045	0.0920153617008116	0.204113547533904	0.0234224625056519
chr7:43002798	AC005537.2	-	0.657765203983691	0.750169713618136	-0.092404509634445	-5.14524179492171	10.9737204272268	0.000323064501444355	0.0322212889719699	-0.131944030145201	-0.0528649891236892	0.0179592161685476
chr7:43426912	HECW1	-	0.596901804199941	0.710181425042106	-0.113279620842165	-6.30010790448329	10.9879598667255	5.86517224631037e-05	0.0188236735575999	-0.152859911294393	-0.0736993303899372	0.0179805842311928
chr7:45819470	AC096582.1	-	0.596604702487055	0.692844084020555	-0.0962393815334992	-4.62383952866406	10.0044132378365	0.000943928396683445	0.0480499865959979	-0.14261250552657	-0.0498662575404282	0.0208137373576425
chr7:46330785	AC023669.2	-	0.647121049376688	0.728884111058024	-0.0817630616813356	-5.45245003633327	9.22560975024852	0.000371010157576517	0.0338065279624878	-0.115559555667462	-0.0479665676952091	0.0149956553726296
chr7:46341121	AC023669.2	-	0.579195235406415	0.674472219508984	-0.0952769841025688	-5.90911288591646	9.3711333152485	0.000193148908381201	0.0272530753780381	-0.131532397434163	-0.0590215707709746	0.0161237373429856
chr7:47064709	AC004870.3	-	0.60887127578304	0.704886363636364	-0.0960150878533231	-4.87917630052018	10.7605259027256	0.000519638101853943	0.0385111741632356	-0.139445165690014	-0.0525850100166319	0.019678544479544
chr7:47339013	TNS3	-	0.609428589947776	0.724973006472058	-0.115544416524282	-5.47350479549562	9.68760984430341	0.00030389388656295	0.0315932271870803	-0.162786313325008	-0.0683025197235558	0.0211097680263966
chr7:47770945	PKD1L1	-	0.649114731024669	0.741498599439776	-0.092383868415107	-6.66419086154483	10.0536052249169	5.46767277967158e-05	0.018351795330547	-0.12324964292612	-0.0615180939040945	0.01386272847439
chr7:48569594	ABCA13	-	0.665225355876616	0.787768440709617	-0.122543084833001	-8.68838007691589	10.0503811222965	5.4852276945924e-06	0.00969589840442519	-0.153947971697583	-0.0911381979684182	0.0141042500153262
chr7:55815467	SEPTIN14	+	0.665071832928976	0.769715578539108	-0.104643745610132	-8.68739667606885	6.97382377455851	5.48420015910441e-05	0.0183612871444107	-0.133148434902664	-0.0761390563176004	0.0120454664972758
chr7:57467618	ZNF716	-	0.577169664160326	0.658105506353485	-0.0809358421931584	-4.71831908755508	10.187222862489	0.000778088647013457	0.0447922527273097	-0.119061296722247	-0.0428103876640701	0.0171535330042923
chr7:68031787	AC092637.1	-	0.587243750401645	0.668462755472559	-0.0812190050709143	-4.6510505864135	10.4599838824846	0.000804423760131991	0.0454022310378057	-0.119897209354087	-0.042540800787742	0.0174625073543961
chr7:69408520	AC092100.1	+	0.641134442886808	0.733915665273424	-0.0927812223866162	-5.5341892850192	8.62089545773145	0.00042372656584111	0.0353716353600513	-0.130962263552148	-0.054600181221084	0.0167650973987772
chr7:72316819	CALN1	+	0.609411032317436	0.697607410510636	-0.0881963781931999	-5.9248980302773	8.62881568822659	0.000262102960030233	0.0300215864588826	-0.122092326465152	-0.0543004299212476	0.0148857208584013
chr7:78820369	MAGI2	+	0.64729387510522	0.732104489713185	-0.084810614607965	-5.22718259020027	7.44826944435762	0.00099945950985035	0.0491363207157564	-0.12271329628107	-0.0469079329348596	0.0162249190925461
chr7:79240772	MAGI2	-	0.660805860805861	0.789326949853266	-0.128521089047405	-7.14123644034017	9.62644748083152	3.82871737451845e-05	0.0166625219869005	-0.168832911135634	-0.0882092669591763	0.0179970359644447
chr7:80294182	AC003988.1	-	0.610938518457315	0.703219095648657	-0.0922805771913416	-4.7587722032023	9.84535915386856	0.000803997991887536	0.0454022310378057	-0.135580095695565	-0.0489810586871188	0.0193916777796684
chr7:80504960	GNAT3	+	0.618849278841972	0.715857853901332	-0.0970085750593606	-8.75462370664167	10.0207578876967	5.22773783759944e-06	0.00969589840442519	-0.12169129197893	-0.0723258581397914	0.0110808389155282
chr7:80504960	CD36	+	0.618849278841972	0.715857853901332	-0.0970085750593606	-8.75462370664167	10.0207578876967	5.22773783759944e-06	0.00969589840442519	-0.12169129197893	-0.0723258581397914	0.0110808389155282
chr7:82977538	PCLO	-	0.618494397759104	0.699179413870506	-0.0806850161114022	-4.90296036073199	9.95982463429975	0.000627728748434016	0.0413267952362838	-0.117372190984148	-0.0439978412386562	0.016456387605662
chr7:84359924	SEMA3A	-	0.558631736162326	0.642491948470209	-0.0838602123078837	-5.85437554082778	10.5751536660409	0.000128830380300382	0.0240627229080912	-0.115543150494188	-0.0521772741215795	0.0143243650365529
chr7:85464032	LINC00972	-	0.614985118081093	0.705940977923737	-0.0909558598426432	-7.74026956543188	10.6636384551303	1.07492412764364e-05	0.0117013195807153	-0.116919506721419	-0.0649922129638677	0.0117509938218241
chr7:8733582	NXPH1	-	0.652973810541643	0.75838902812587	-0.105415217584227	-9.22343229826161	10.9991884713599	1.64885863356696e-06	0.0070944656213233	-0.130570648948343	-0.0802597862201108	0.0114290661193551
chr7:8744823	NXPH1	-	0.545045865652273	0.633738387216648	-0.0886925215643751	-5.10466113415569	7.94350123155517	0.000944982126156389	0.0480545105689605	-0.128808565204481	-0.0485764779242694	0.017374810831404
chr7:87622188	ABCB1	+	0.593350673602774	0.674424333836099	-0.0810736602333241	-5.83381524625364	9.7002725825446	0.000186035674568318	0.0269499657614484	-0.112168718701305	-0.0499786017653436	0.013897193656482
chr7:88246262	AC003991.1	-	0.605866005202051	0.686160714285714	-0.0802947090836628	-5.42720369793825	10.9769898091386	0.000209424150552061	0.0279193293925569	-0.112866302458706	-0.0477231157086197	0.0147948581908149
chr7:90585892	CDK14	-	0.668491396558623	0.756215425952268	-0.0877240293936447	-6.50580262235547	8.60682620988972	0.00013527682954945	0.0244131326908152	-0.118440616427802	-0.0570074423594877	0.0134839672344507
chr7:91117296	CDK14	-	0.544232020702609	0.771188672438672	-0.226956651736063	-6.03167496288279	10.0004896635242	0.000126627904732056	0.0238401544721544	-0.310795316835915	-0.143117986636212	0.0376274671849345
chr7:9126094	AC004852.2	-	0.605310538867257	0.728716779176549	-0.123406240309293	-5.00032611370649	10.3636216264558	0.000481978152228221	0.0372882712792132	-0.178135494540694	-0.0686769860778913	0.0246796383881886
chr7:93220944	HEPACAM2	+	0.633380275186998	0.824818456397404	-0.191438181210406	-6.09007628136856	7.85931124896574	0.000314195778449507	0.031900365198017	-0.264152633446462	-0.11872372897435	0.0314344471835394
chr7:94570093	SGCE	-	0.665694366991648	0.773635840809754	-0.107941473818106	-5.81051982511184	7.43196643057573	0.000526781143395631	0.0387930716050904	-0.151356558409237	-0.0645263892269744	0.0185769048324395
chr8:103533882	RIMS2	+	0.595634920634921	0.703555800924222	-0.107920880289301	-6.47587389977009	9.80205915567312	7.79049525099274e-05	0.0204965097803925	-0.145154857068348	-0.0706869035102548	0.0166650682146749
chr8:105292723	ZFPM2	+	0.631067154134381	0.735446900769481	-0.1043797466351	-5.33428461414156	9.56891453561957	0.000384059318639988	0.0342481609135003	-0.148247041794739	-0.0605124514754615	0.0195677122961123
chr8:108902310	AC104248.1	+	0.611651583710407	0.704991809402395	-0.0933402256919876	-5.2706852769465	10.3405491773157	0.000324322419783005	0.0322343097419059	-0.132623598808502	-0.0540568525754735	0.0177093149728081
chr8:112750067	CSMD3	+	0.470785270629991	0.55406746031746	-0.0832821896874692	-4.96625350713429	10.1133719405424	0.000546039571314342	0.0393690234907935	-0.120590535126583	-0.0459738442483553	0.0167696211173735
chr8:113133376	CSMD3	+	0.557724796815278	0.645591503005296	-0.0878667061900182	-4.79611213367411	10.9958738845475	0.000557397461758569	0.0397449639862508	-0.128191487027958	-0.0475419253520789	0.018320402805659
chr8:113450936	AC055788.1	-	0.624859964052511	0.711288775255229	-0.0864288112027188	-5.16434558289273	10.9407972762691	0.000316665436898303	0.0319808523780927	-0.123288117346082	-0.0495695050593553	0.0167356753756024
chr8:118550045	SAMD12	+	0.587799811937743	0.679165464165464	-0.0913656522277212	-4.5061628777139	10.9997519568646	0.000892163931773102	0.0471296575602705	-0.135992312073358	-0.0467389923820844	0.0202757101123858
chr8:120779819	SNTB1	+	0.40438637177359	0.48868778280543	-0.08430141103184	-5.05730350228417	8.56606887352371	0.000795513261109839	0.0452116914367661	-0.122303054395615	-0.046299767668065	0.0166692410281022
chr8:122651658	LINC01151	-	0.654611844737895	0.738468545202825	-0.08385670046493	-4.53848889548956	10.9566842020475	0.000854436981973235	0.0464285106864842	-0.124543462058918	-0.0431699388709415	0.0184767887276905
chr8:126143449	LINC00861	+	0.561572373904835	0.476451754944402	0.0851206189604335	6.40055171962663	8.68315898941754	0.000146535656398431	0.024981224232867	0.0548681326712679	0.115373105249599	0.0132989502607127
chr8:13480274	DLC1	+	0.456045286662827	0.261777634423442	0.194267652239385	6.81167333121596	6.11322952886559	0.00045321904111597	0.0363005035769343	0.124794310854659	0.263740993624111	0.0285198133840493
chr8:141968101	AC104417.1	-	0.572936543038268	0.667186617730096	-0.0942500746918281	-5.85364273513666	7.34342033985408	0.0005260558655462	0.0387679823169392	-0.131965135218479	-0.0565350141651775	0.0161010978900522
chr8:142266799	TSNARE1	-	0.633989488772097	0.861740890688259	-0.227751401916162	-4.45396813533046	10.8917534259009	0.000996014901004552	0.0490739710643024	-0.340434279994635	-0.115068523837688	0.0511344928827749
chr8:15140712	SGCZ	-	0.514231333559065	0.604703994835574	-0.0904726612765091	-4.63345992024647	10.3898498836754	0.000841796696171012	0.0461561696761467	-0.133758901692616	-0.0471864208604026	0.0195259401902189
chr8:15186050	SGCZ	+	0.643289691186795	0.767772967772968	-0.124483276586173	-5.49800011067177	10.7050289844557	0.000205883918557625	0.0277224126712682	-0.174485049835631	-0.0744815033367139	0.0226415558531087
chr8:16230255	MSR1	-	0.522286402483699	0.636802395135728	-0.11451599265203	-5.17528663999516	7.87990613087036	0.000889062512068047	0.0470668186437945	-0.165677706959227	-0.0633542783448326	0.0221274686057074
chr8:16850309	AC011586.2	+	0.64115527284841	0.727958746222503	-0.0868034733740938	-5.42229215175546	7.51622539397961	0.000776505898287565	0.0447801301694567	-0.124137146344622	-0.0494698004035654	0.0160086308418463
chr8:20166488	SLC18A1	+	0.660789871504157	0.760287047336547	-0.0994971758323895	-5.53373945359088	10.720919279085	0.000194275545535735	0.0273276813005258	-0.139197154229022	-0.0597971974357574	0.0179800976657521
chr8:22029346	NPM2	-	0.617490842490843	0.761440058479532	-0.14394921598869	-5.93291412116872	10.7822827503585	0.00010663104764654	0.0226740862756589	-0.197483173211244	-0.0904152587661355	0.024262818077052
chr8:23378560	LOXL2	-	0.668806916359221	0.487324079429343	0.181482836929878	5.03252670765227	8.65382512840192	0.000796657460099865	0.0452116914367661	0.0994048224163323	0.263560851443425	0.0360619719422298
chr8:2673131	AC246817.2	-	0.539026739350711	0.666727964765624	-0.127701225414912	-8.80840829552962	10.9992148312594	2.5873825806512e-06	0.00797269741178083	-0.159610617050963	-0.0957918337788617	0.0144976505550637
chr8:2738589	AC246817.1	+	0.595997245051867	0.676727893908094	-0.0807306488562272	-5.58631314381092	9.55356299066067	0.000274062952291083	0.0304692628548792	-0.113135745393628	-0.0483255523188265	0.0144515079584589
chr8:2816459	AC246817.1	-	0.517088653643275	0.634402591445935	-0.11731393780266	-5.27862353569827	7.72226873654187	0.000838352293835059	0.046082583246342	-0.16888597444609	-0.0657419011592288	0.0222243425789487
chr8:30077907	SARAF	+	0.633343395837867	0.525850876464412	0.107492519373455	7.40774459902822	10.9333464931829	1.39380506810249e-05	0.0127233847248448	0.0755306274271366	0.139454411319774	0.0145108295698473
chr8:32042385	NRG1-IT1	+	0.560591362419093	0.65719696969697	-0.0966056072778763	-8.14790944042376	10.5593912776969	7.1203939098693e-06	0.0100346862669303	-0.12283503534196	-0.070376179213793	0.0118564900584919
chr8:32042385	NRG1	+	0.560591362419093	0.65719696969697	-0.0966056072778763	-8.14790944042376	10.5593912776969	7.1203939098693e-06	0.0100346862669303	-0.12283503534196	-0.070376179213793	0.0118564900584919
chr8:32395479	NRG1	-	0.640245583613562	0.737123256860099	-0.0968776732465365	-6.68783477083488	10.9717907854028	3.47512362469503e-05	0.016330330820541	-0.128770390947189	-0.0649849555458837	0.014485655906006
chr8:33840373	AF279873.3	-	0.465770123839009	0.623677248677249	-0.157907124838239	-8.82357215914949	9.62127617562338	6.42798911947836e-06	0.0097754614274205	-0.197995803044244	-0.117818446632235	0.0178960541139225
chr8:33849604	AF279873.3	+	0.551458272198591	0.638669574153445	-0.0872113019548546	-6.19755832604659	7.43492883302128	0.000350552053812495	0.0330344282174118	-0.120095457283049	-0.0543271466266606	0.014071880790267
chr8:33877904	AF279873.3	-	0.355758980884206	0.447945881279215	-0.0921869003950083	-4.85217913806273	9.43477144990585	0.000790920093261783	0.0450772070114513	-0.134865767567633	-0.0495080332223836	0.0189990719163379
chr8:3620692	CSMD1	+	0.609309812994024	0.694351944351944	-0.0850421313579208	-5.20903653242579	10.1012488835334	0.000383326685303581	0.0342217517186478	-0.121369107555915	-0.048715155159927	0.0163258849939986
chr8:36548829	AC090809.1	-	0.615584639652963	0.704322169059011	-0.0887375294060485	-5.37987314766219	10.9759278117234	0.000225092933179594	0.0286206281325923	-0.125051073251003	-0.0524239855610939	0.0164943534857526
chr8:39831455	ADAM2	+	0.513302486986698	0.623865431066518	-0.11056294407982	-6.19125555311008	10.9250241882551	7.00448982483338e-05	0.0198418834907519	-0.149900895296145	-0.0712249928634958	0.0178579196305798
chr8:4456407	CSMD1	+	0.618660751013692	0.785774029891677	-0.167113278877985	-4.96781682879987	8.97886435289024	0.000777646981515214	0.0447922527273097	-0.243237702449444	-0.0909888553065258	0.0336391788660928
chr8:46939517	AC091163.2	+	0.650774390118243	0.871503354690961	-0.220728964572718	-9.34139064463559	6.37548439379829	5.94867904870452e-05	0.0188646843489033	-0.277731882962196	-0.163726046183239	0.0236291332810789
chr8:4951263	CSMD1	+	0.635928247997213	0.723069358178054	-0.0871411101808404	-5.35338036791941	8.38658224389661	0.000583548458077725	0.0403164747752349	-0.124378668494032	-0.0499035518676485	0.0162777729568855
chr8:53474838	AC022034.3	+	0.588720583927351	0.675255754475703	-0.0865351705483525	-5.35299559302226	9.82431921217525	0.000342251892747527	0.0328622825335285	-0.1226421980141	-0.050428143082605	0.0161657466449539
chr8:57527746	AC090796.1	-	0.644981918132506	0.737241790258202	-0.0922598721256966	-7.65076032689373	10.1061371456591	1.6344263046127e-05	0.0134329535745402	-0.119090609644035	-0.0654291346073583	0.0120589154781633
chr8:57788065	AC104051.1	+	0.558963585434174	0.640885984023239	-0.0819223985890652	-5.02450349141349	10.6873424795482	0.000422985664393469	0.0353716353600513	-0.117937032628019	-0.0459077645501119	0.0163045759106476
chr8:60475711	LINC01301	-	0.562904089429939	0.644756791290765	-0.0818527018608258	-4.99139529511539	9.27576676527294	0.000682752366581276	0.0426909031992945	-0.11878183950992	-0.0449235642117316	0.0163987616730992
chr8:63415812	AC011124.1	-	0.646100752747026	0.735850569183903	-0.0897498164368762	-7.21968127992367	10.8572997139801	1.8350965212449e-05	0.0136666101194708	-0.117154799086164	-0.0623448337875883	0.0124312712649034
chr8:63887295	LINC01414	-	0.642423088220127	0.754331323221747	-0.111908235001621	-6.45970810676358	5.98555511740908	0.000658859075608834	0.0421232240479514	-0.1543234414979	-0.0694930285053413	0.0173240389739048
chr8:64023509	LINC01414	+	0.533999689606097	0.617990523968785	-0.0839908343626879	-6.64868233582499	10.8311689634429	3.89891258198137e-05	0.0167349079731407	-0.111848197081784	-0.0561334716435917	0.012632703762988
chr8:64616316	CYP7B1	+	0.639198406635381	0.734029822516665	-0.0948314158812832	-5.08783335112281	10.5876534028202	0.000395154805805118	0.0345777605895702	-0.136051047023883	-0.0536117847386833	0.0186388604611736
chr8:69055930	LINC01592	-	0.610313813408695	0.691502264499556	-0.081188451090861	-4.58386933756178	10.0037687184381	0.00100366808375635	0.0492068466498268	-0.120650724482297	-0.041726177699425	0.017711772546738
chr8:70898454	AC015687.1	-	0.670129403395994	0.762313829487743	-0.0921844260917487	-8.23990588190144	10.8696354355623	5.3238994512891e-06	0.00969589840442519	-0.11684415471896	-0.0675246974645375	0.0111875581363408
chr8:75463326	HNF4G	-	0.617900432037067	0.716145286046386	-0.0982448540093194	-8.15996268140296	10.5375092193074	7.11709458721207e-06	0.0100346862669303	-0.124887013953519	-0.0716026940651197	0.0120398656029672
chr8:76207877	AC011029.1	-	0.636377713140592	0.745310909850384	-0.108933196709791	-5.48286335861975	7.09109819144634	0.000883754221748817	0.0469572406515783	-0.155791334514272	-0.0620750589053107	0.0198679393566383
chr8:76236910	AC011029.1	+	0.63109636837191	0.729500805152979	-0.0984044367810688	-6.46706000303297	10.2506168109018	6.41882905465164e-05	0.0193705409591816	-0.132196343573707	-0.0646125299884309	0.0152162554135756
chr8:76253799	AC011029.1	+	0.649557169228467	0.783677167823509	-0.134119998595042	-13.2207695872022	10.896102517933	4.73263474287091e-08	0.00128442796799451	-0.156474212450763	-0.111765784739322	0.0101446438280621
chr8:78491339	PKIA-AS1	+	0.558562667491239	0.65048906659438	-0.0919263991031407	-8.40256979285125	6.02206391022201	0.000151809598761625	0.0252646618448489	-0.11867252328301	-0.0651802749232711	0.0109402720083742
chr8:80770904	ZNF704	-	0.603296038785519	0.68381218228032	-0.0805161434948002	-5.02454078687181	10.4552296303403	0.000452333982378763	0.0362872543947065	-0.116011517745492	-0.0450207692441085	0.0160245775504846
chr8:82157673	AC060765.2	-	0.590019692087361	0.687575333163568	-0.0975556410762072	-6.98323854429838	8.54170219316597	8.33644460210947e-05	0.0208790089772647	-0.129418278518558	-0.0656930036338561	0.0139699711612829
chr8:82157673	LINC02839	-	0.590019692087361	0.687575333163568	-0.0975556410762072	-6.98323854429838	8.54170219316597	8.33644460210947e-05	0.0208790089772647	-0.129418278518558	-0.0656930036338561	0.0139699711612829
chr8:82599390	AC060765.1	-	0.655410561660562	0.755344542768478	-0.0999339811079162	-5.39185988267501	8.89809221836621	0.000454974191568529	0.0363667550597484	-0.141934637821524	-0.0579333243943081	0.0185342318388172
chr8:82599390	AC060765.2	-	0.655410561660562	0.755344542768478	-0.0999339811079162	-5.39185988267501	8.89809221836621	0.000454974191568529	0.0363667550597484	-0.141934637821524	-0.0579333243943081	0.0185342318388172
chr8:82642213	AC060765.1	+	0.622813313514712	0.770621353954687	-0.147808040439975	-8.56873242560431	10.3378997087329	5.14564725521512e-06	0.00963116392820616	-0.186073155694743	-0.109542925185208	0.0172496972829153
chr8:82642213	AC060765.2	+	0.622813313514712	0.770621353954687	-0.147808040439975	-8.56873242560431	10.3378997087329	5.14564725521512e-06	0.00963116392820616	-0.186073155694743	-0.109542925185208	0.0172496972829153
chr8:84823532	RALYL	-	0.542175788696345	0.65869939707149	-0.116523608375145	-8.65067418859237	10.8742156744286	3.33728377040881e-06	0.00847277389877691	-0.146212524654851	-0.0868346920954384	0.0134698875295528
chr8:87119141	CNBD1	-	0.643927914415194	0.726026714513557	-0.0820988000983626	-4.6866447889922	9.48082372740042	0.000991754410895632	0.0489808415382912	-0.121422130829563	-0.0427754693671625	0.0175176066876655
chr8:8729945	AC087269.1	+	0.626433883576741	0.726553852703278	-0.100119969126537	-6.62060603829439	9.56001323144083	7.32073100605686e-05	0.020154246789382	-0.13402634165396	-0.0662135965991149	0.0151224779948288
chr8:87754754	AF121898.1	-	0.669410360635482	0.775866413345191	-0.106456052709709	-6.48453343169334	10.5700220244712	5.44476065698308e-05	0.018351795330547	-0.142769590498082	-0.0701425149213355	0.0164169178601812
chr8:88695253	AC090578.1	-	0.567687867687868	0.720559364096516	-0.152871496408648	-7.87412478947865	10.5446132689097	9.82907322100743e-06	0.0112036913395411	-0.195828560229001	-0.109914432588295	0.0194144111880109
chr8:88695425	AC090578.1	-	0.56141046895787	0.646621142575468	-0.0852106736175979	-5.40068826407404	10.9999236708533	0.000216438471124439	0.0281988955490747	-0.119937282102052	-0.0504840651331442	0.0157777434006752
chr8:88869601	AC090578.1	-	0.56101528715528	0.643256985055231	-0.0822416978999504	-4.84645099675965	8.77714706606339	0.000980699979806162	0.0487885103109504	-0.120778391553404	-0.0437050042464969	0.0169694685770964
chr8:90563009	AC004083.1	-	0.621430846990944	0.715099815643294	-0.09366896865235	-5.82307607486951	7.37579696920757	0.000534567684757883	0.0390085559335576	-0.131316534597852	-0.0560214027068484	0.0160858225872395
chr8:90563009	LINC00534	-	0.621430846990944	0.715099815643294	-0.09366896865235	-5.82307607486951	7.37579696920757	0.000534567684757883	0.0390085559335576	-0.131316534597852	-0.0560214027068484	0.0160858225872395
chr8:91355822	SLC26A7	-	0.630948520452491	0.715369879162983	-0.0844213587104912	-5.96926542118908	6.12377713297979	0.000919778696445844	0.0476144912985943	-0.118858379792119	-0.0499843376288637	0.0141426712926554
chr8:92640025	AC091096.1	+	0.609425462975159	0.699412393162393	-0.0899869301872344	-6.45229020983422	7.5305972370093	0.000256634253660074	0.0298877886749342	-0.122499943449364	-0.0574739169251045	0.0139465100391922
chr8:97990392	MATN2	+	0.655136968294863	0.769873382401987	-0.114736414107124	-6.50419891296481	8.06510782204823	0.000180729668835555	0.0266685863380964	-0.15535806861196	-0.0741147596022874	0.017640360579751
chr9:10012373	PTPRD	+	0.633827964650946	0.733452658452658	-0.0996246938017123	-4.90486770519949	8.46700247233155	0.001006087376604	0.0492460090170619	-0.146016963375383	-0.053232424228042	0.0203113926388072
chr9:100331619	TEX10	+	0.644460946433909	0.733465608465608	-0.089004662031699	-5.11729052674186	8.51236892791761	0.000750291543288195	0.0442441129657947	-0.128696468247523	-0.0493128558158745	0.017392927285754
chr9:10303323	PTPRD	+	0.563035836344107	0.656162074640335	-0.0931262382962285	-7.74577606467447	9.11069973886608	2.6705314223521e-05	0.0149815264454611	-0.120273504155823	-0.0659789724366335	0.0120228415485624
chr9:103369163	AL390962.1	+	0.582612684587412	0.680763023600245	-0.0981503390128331	-5.86123532666803	9.87741866859349	0.00016709305971662	0.0260050090853853	-0.135524887761024	-0.0607757902646417	0.0167456745110129
chr9:10392030	PTPRD	-	0.571838328611728	0.659166666666667	-0.087328338054939	-5.45819882781037	9.29711114673334	0.000358405660219482	0.0333206295189689	-0.123346125636775	-0.0513105504731033	0.0159994790973879
chr9:10469388	PTPRD	+	0.623913768752768	0.711218128309583	-0.0873043595568141	-4.77417532757003	10.989458533805	0.000578333096838912	0.0402029104350367	-0.127558032171626	-0.0470506869420023	0.0182867937531843
chr9:107486539	KLF4	+	0.586226613294282	0.667210141236838	-0.080983527942555	-6.2084878924169	6.36460967931828	0.000642053962299622	0.0417451735539053	-0.112463023023154	-0.0495040328619561	0.0130440019125219
chr9:109540774	PALM2AKAP2	-	0.628638028638029	0.715741978609626	-0.087103949971597	-5.25569399820693	10.4251358580375	0.000322746531712031	0.0322011738933266	-0.123828352142083	-0.0503795478011107	0.0165732536942436
chr9:110026114	PALM2AKAP2	-	0.572948855655623	0.661021394064872	-0.0880725384092498	-6.18850474302874	7.9224789332594	0.000273388334477845	0.0304589870154518	-0.120946726870459	-0.0551983499480404	0.0142316346300715
chr9:110956074	LPAR1	+	0.610037494529976	0.696050599913839	-0.0860131053838629	-5.74495659099983	10.9025900031864	0.000133837419098401	0.0243660325337414	-0.119002064629996	-0.05302414613773	0.014971933037512
chr9:110989906	LPAR1	+	0.629640101654697	0.70981684981685	-0.0801767481621528	-6.365666198093	10.9820253863024	5.36756383539521e-05	0.0183468765959512	-0.107904101885873	-0.0524493944384324	0.0125951857460216
chr9:111235238	AL162414.1	-	0.653252774794128	0.741854636591479	-0.0886018617973505	-7.69541999186089	9.59705921427375	2.09355828180399e-05	0.0140875400148853	-0.114402476379533	-0.062801247215168	0.0115135836498932
chr9:111235628	AL162414.1	-	0.578955171812315	0.691330215123319	-0.112375043311004	-7.57159836724104	9.55270146181053	2.46051793475043e-05	0.0145288435894105	-0.14565540534099	-0.0790946812810178	0.0148416540155116
chr9:113940951	ZNF618	-	0.652590441079864	0.806592109312497	-0.154001668232633	-30.6735368930453	9.90181670988732	3.80667405984746e-11	1.34306122511023e-05	-0.165203469205098	-0.142799867260168	0.00502066875331714
chr9:115712088	AL691420.1	-	0.565750915750916	0.663311027899129	-0.0975601121482128	-5.68037620588505	9.84109548310669	0.000216338855382153	0.0281988955490747	-0.135912183297203	-0.0592080409992221	0.0171749385273351
chr9:116831650	ASTN2	+	0.601377220602228	0.728641456582633	-0.127264235980405	-7.59766129420515	6.80574709297687	0.000145852271928697	0.0249257611776232	-0.167103087567343	-0.0874253843934665	0.0167504487305154
chr9:119163385	BRINP1	-	0.65742787946686	0.861456311887346	-0.204028432420486	-6.80810567792661	10.1944576301496	4.26830215300297e-05	0.0170760844457794	-0.270630072859101	-0.137426791981872	0.0299684584923515
chr9:11918403	AL353595.1	+	0.615677070603179	0.698205281851542	-0.0825282112483627	-7.30048509381907	10.7312296109793	1.76792884944554e-05	0.0136666101194708	-0.107485452128379	-0.0575709703683465	0.011304483221017
chr9:121282986	GSN-AS1	-	0.376216640502355	0.278641679957469	0.0975749605448854	5.24718967252267	9.37352105625388	0.000463676253517695	0.0366718441101725	0.0557627962444359	0.139387124845335	0.018595661036582
chr9:121282986	GSN	-	0.376216640502355	0.278641679957469	0.0975749605448854	5.24718967252267	9.37352105625388	0.000463676253517695	0.0366718441101725	0.0557627962444359	0.139387124845335	0.018595661036582
chr9:122021820	TTLL11	+	0.660970926832271	0.749819624819625	-0.0888486979873534	-5.82388804016286	9.75827899598023	0.000184179549684048	0.0268519703597734	-0.122955459237957	-0.0547419367367497	0.015255907629857
chr9:130360723	HMCN2	-	0.657495199036552	0.775841750841751	-0.118346551805198	-6.78452236840748	10.7913057228739	3.31744847662403e-05	0.0160887130982996	-0.156830458052803	-0.0798626455575939	0.0174436084633291
chr9:131970640	MED27	+	0.64576407374544	0.760754543363239	-0.114990469617799	-6.17159848017361	8.07520662552719	0.000257550253449473	0.0298994421540508	-0.157886851955301	-0.0720940872802967	0.0186322020117167
chr9:13551486	AL583785.1	+	0.554005742954126	0.673972179645938	-0.119966436691813	-7.1947049219561	8.17533627138949	8.33816361879487e-05	0.0208790089772647	-0.158274296546093	-0.0816585768375324	0.0166742678112775
chr9:17180266	CNTLN	-	0.654524092748532	0.741158016569201	-0.0866339238206685	-6.20849827644904	7.16982730676779	0.000401238330184911	0.0347012880402046	-0.119472318693602	-0.0537955289477354	0.0139540867957233
chr9:17651340	SH3GL2	-	0.451867062614519	0.549251207729469	-0.0973841451149491	-6.93398510004172	9.75313899563257	4.56421075385216e-05	0.0174623435903743	-0.128784869139038	-0.0659834210908606	0.0140444699130321
chr9:18098083	ADAMTSL1	-	0.635269142622084	0.72567930320554	-0.0904101605834563	-5.86088513060235	10.7452414698548	0.000119813667192656	0.0235025771221701	-0.124461083720965	-0.0563592374459475	0.0154260250062544
chr9:22708291	AL391117.1	-	0.59708386851244	0.739889467830644	-0.142805599318204	-6.70717916018394	10.5204777973622	4.15825373940582e-05	0.0170296539605666	-0.1899296989246	-0.0956814997118089	0.0212914544114083
chr9:22708291	LINC01239	-	0.59708386851244	0.739889467830644	-0.142805599318204	-6.70717916018394	10.5204777973622	4.15825373940582e-05	0.0170296539605666	-0.1899296989246	-0.0956814997118089	0.0212914544114083
chr9:22758094	LINC01239	-	0.505073180787466	0.292775404812677	0.21229777597479	5.71594882718221	8.15029797006371	0.00041663537399994	0.0352021689612587	0.126923923719218	0.297671628230362	0.0371413010146639
chr9:22758094	AL391117.1	-	0.505073180787466	0.292775404812677	0.21229777597479	5.71594882718221	8.15029797006371	0.00041663537399994	0.0352021689612587	0.126923923719218	0.297671628230362	0.0371413010146639
chr9:2562278	VLDLR-AS1	+	0.656349206349206	0.752729817581749	-0.0963806112325428	-8.19421422507627	10.6159181151225	6.53083572853581e-06	0.00983197389221267	-0.122383403485111	-0.0703778189799748	0.0117620321589342
chr9:28230007	LINGO2	+	0.598133348133348	0.693136737117378	-0.0950033889840302	-5.7638282750912	10.2369700796706	0.000166057694898646	0.0259635626982614	-0.131614198549797	-0.0583925794182632	0.016482689013237
chr9:28472485	LINGO2	-	0.607840410118163	0.746902489065802	-0.139062078947638	-7.73712116507097	7.96271766194846	5.69227729011103e-05	0.0185956948407754	-0.180542528550187	-0.0975816293450898	0.0179733619237386
chr9:28627037	LINGO2	-	0.583075571382023	0.667654998258447	-0.0845794268764235	-5.87803168983493	7.48682018013886	0.000476772549723006	0.0371127852315271	-0.118160777410577	-0.05099807634227	0.0143890729651372
chr9:29221716	AL162388.2	+	0.603931683897017	0.692310637705374	-0.0883789538083577	-5.16176858524976	10.7124477484581	0.000340190503946081	0.0327892810069653	-0.12618764613493	-0.0505702614817852	0.0171218357329906
chr9:2941373	CARM1P1	+	0.533918824446775	0.650517896737409	-0.116599072290634	-6.29007148580816	6.44756502069245	0.000567192374881738	0.0399917234751971	-0.161205076135947	-0.0719930684453213	0.018537002727824
chr9:30413997	LINC01242	-	0.620460789210789	0.722003753469271	-0.101542964258482	-8.3866776185634	8.02590318863763	3.04480458509931e-05	0.0156518122730343	-0.129447579840422	-0.0736383486765415	0.0121076508334746
chr9:35224286	UNC13B	-	0.607980115122972	0.721222557399028	-0.113242442276056	-6.33544434211675	10.3842212072123	7.1950704942898e-05	0.0200140110763824	-0.152870304705361	-0.07361457984675	0.0178744277687427
chr9:35481088	ATP8B5P	-	0.630088958660387	0.745484443093139	-0.115395484432751	-5.67422997311802	8.66729856112901	0.000349369117922124	0.0330344282174118	-0.161671048425464	-0.0691199204400393	0.0203367655134607
chr9:36371420	RNF38	-	0.635063499083844	0.71820088314712	-0.0831373840632756	-7.815760253372	8.46210390668006	3.77893612052828e-05	0.0166625219869005	-0.107435471397147	-0.0588392967294046	0.0106371461467753
chr9:40802358	AL353626.1	+	0.522089611706752	0.620847543261336	-0.0987579315545847	-5.9107236777036	10.6626225820998	0.000115116838685756	0.0232153388013785	-0.13567503752588	-0.0618408255832892	0.0167082639858667
chr9:41910107	CNTNAP3B	+	0.615107588929292	0.716434937611408	-0.101327348682117	-4.85380872238451	10.9621161090652	0.000512714164827189	0.0382573117170482	-0.14729414996535	-0.0553605473988829	0.0208758429673632
chr9:42892661	ANKRD20A7P	-	0.575058685681631	0.469816701497736	0.105241984183895	5.90165478556195	9.25576941817596	0.000204761194052192	0.0277224126712682	0.0650710770420457	0.145412891325743	0.0178326228842397
chr9:63314438	BMS1P10	-	0.651309523809524	0.754615482556659	-0.103305958747135	-7.33559299011669	10.2102101494151	2.22713946730543e-05	0.0141893359179215	-0.134597126428606	-0.0720147910656643	0.0140828367776566
chr9:64824828	AL359955.1	-	0.468021276297138	0.549557709430468	-0.0815364331333294	-5.62204628415075	9.3326450798013	0.000284639951356815	0.0308943109612889	-0.11416706341179	-0.0489058028548692	0.0145029814790374
chr9:68520176	PGM5	+	0.635800294763274	0.744891473214812	-0.109091178451537	-5.09860379627723	8.97482167100801	0.000652038787288182	0.0419706681155664	-0.157513644029277	-0.0606687128737977	0.0213962847105693
chr9:69612615	APBA1	+	0.586084366270125	0.673354058222479	-0.0872696919523545	-5.20138297733988	10.3841007979105	0.00035438115016935	0.0331517622828781	-0.124467193036373	-0.0500721908683357	0.0167781707927584
chr9:71163671	TRPM3	+	0.590616195973339	0.703452797202797	-0.112836601229458	-5.92098585608445	8.12280198688437	0.000333115673139085	0.0324355542780219	-0.156666891749296	-0.0690063107096212	0.0190570631263215
chr9:71281953	TRPM3	+	0.670667376704725	0.872831319383043	-0.202163942678318	-7.7724460402986	8.01773159405143	5.30712285863321e-05	0.0183033059722752	-0.262120806500911	-0.142207078855726	0.0260103372387712
chr9:71880000	ABHD17B	+	0.663652262524443	0.842811134115482	-0.179158871591039	-9.89773571434634	6.98705031297917	2.31765029301808e-05	0.0143206231568635	-0.221977011591759	-0.136340731590319	0.0181009956985774
chr9:72171383	GDA	-	0.61535876651084	0.695791221853677	-0.0804324553428366	-6.50681038742817	10.934307126519	4.51167328210799e-05	0.017444594613869	-0.107659388583319	-0.0532055221023547	0.0123612723521559
chr9:82246218	AL162726.3	-	0.637420700030634	0.722680329409719	-0.0852596293790853	-6.33236093313806	6.93385121637434	0.000407273410820014	0.0348444720102639	-0.117158874900318	-0.0533603838578526	0.0134641139820238
chr9:82575798	AL162726.3	+	0.563657107213008	0.667175184337656	-0.103518077124648	-6.45461782701856	10.5763950374197	5.65002275135487e-05	0.0185314956771959	-0.138990368111251	-0.0680457861380446	0.0160378321225044
chr9:85946683	NAA35	-	0.669942163100058	0.791913963653094	-0.121971800553036	-6.6973335122546	9.34439674944291	7.43936235024365e-05	0.0202789696026141	-0.162939892592759	-0.0810037085133139	0.0182119944198472
chr9:87689228	DAPK1	-	0.665384615384615	0.762962962962963	-0.0975783475783476	-4.43373732495003	10.9096372701995	0.00102560949601229	0.0496180782847732	-0.146066950889968	-0.0490897442667277	0.0220081480761712
chr9:87693066	DAPK1	-	0.603514963297572	0.722293079282327	-0.118778115984755	-9.36109531415582	6.14720155217152	7.30627071249012e-05	0.0201389075554999	-0.149646388438993	-0.0879098435305165	0.0126884848405655
chr9:89058354	SHC3	+	0.634052283120606	0.741849713199458	-0.107797430078852	-5.59473601266777	8.49853786203624	0.000413721129975628	0.0350964124482158	-0.151779098193835	-0.0638157619638698	0.0192676526354012
chr9:89059169	SHC3	+	0.637350918916754	0.725974025974026	-0.0886231070572723	-5.73247875127999	9.54141544825399	0.000226647067335433	0.0286767264406022	-0.123295476889788	-0.053950737224757	0.0154598230368466
chr9:91201867	AL158071.3	+	0.654023952823356	0.829234412841869	-0.175210460018513	-6.42272020669315	6.74700472691883	0.000418590016027713	0.0352556416757836	-0.24021050737148	-0.110210412665547	0.0272797902415126
chr9:91230571	AUH	-	0.642246292456377	0.730182671359142	-0.0879363789027654	-8.38264604111538	10.9999763458934	4.17783023381596e-06	0.00874784343334933	-0.11102535520293	-0.0648474026026013	0.0104902889220722
chr9:91330202	AUH	+	0.66494966886672	0.800738187012697	-0.135788518145977	-5.35031545927592	7.11314988798873	0.00100967220107788	0.04931201852212	-0.195608601203301	-0.0759684350886538	0.0253795349413573
chr9:91609433	ROR2	+	0.610649667792525	0.747626236484932	-0.136976568692407	-7.29998527450784	8.83605394422832	5.02671113554503e-05	0.0179960594222746	-0.179543933357706	-0.0944092040271085	0.0187639513699762
chr9:95214837	FANCC	+	0.481153777300394	0.577003650430424	-0.0958498731300301	-5.27570227227506	10.3222822059806	0.000323838005958619	0.0322241338945997	-0.136160417854194	-0.0555393284058659	0.0181681732939597
chr9:96262685	HSD17B3	-	0.682686335403727	0.802400933741513	-0.119714598337787	-8.25544784924376	6.90234173671259	8.05653641259309e-05	0.0206090607906728	-0.154103282816913	-0.0853259138586608	0.0145012845485728
chr9:96262685	AL160269.1	-	0.682686335403727	0.802400933741513	-0.119714598337787	-8.25544784924376	6.90234173671259	8.05653641259309e-05	0.0206090607906728	-0.154103282816913	-0.0853259138586608	0.0145012845485728
chr9:97803067	PTCSC2	+	0.597684491087789	0.493023332803644	0.104661158284145	8.64033398239117	8.54506976906694	1.65693921800845e-05	0.0135166971687791	0.0770354416335033	0.132286874934787	0.0121130917505553
† NA - not applicable (no mapped gene to site); mean MD - mean methylation in MD patients; Mean Control - mean methylation in controls; ∆Mean - difference in methylation between MD patients and controls; padjust – p-value corrected by FDR; DF - degrees of freedom; CI_1 - lower bound of confidence interval; CI_2 - higher bound of confidence interval; SE - standard error
