# Supplementary material for: DNA Methylation Signature in Mononuclear Cells and Proinflammatory Cytokines May Define Molecular Subtypes in Sporadic Meniere Disease
Source: Preprints.org preprint supplement (doi:10.20944/preprints202110.0030.v1), 2021-10-01
Supplement: Supplementary file 12 [file Table_S5.xls]

## Sheet: Folha1
chr	start	end	nCpG	methdiff	gene
chr16	32346	32347	1	-0.25	IL9RP3
chr16	32346	32347	1	-0.25	Z84723,1
chr16	39180	39181	1	-0.371429	NA
chr5	56907	57077	1	0.173333	NA
chr10	61959	61960	1	-0.122525	TUBB8
chr18	89235	89236	1	-0.357143	NA
chr20	193893	193895	1	-0.240086	NA
chr19	244427	244428	1	0.17224	LINC01002
chr20	247325	247326	1	-0.120468	NA
chr16	264730	264813	1	0.0921927	FAM234A
chr8	309817	309818	1	-0.285862	NA
chr18	323672	323673	1	-0.352941	COLEC12
chr11	338367	338368	1	-0.30303	NA
chr6	397778	397779	1	-0.314286	IRF4
chr8	420686	420687	1	-0.218487	FBXO25
chr2	422956	422957	1	-0.378378	AC105393,1
chr17	428007	428008	1	-0.339024	C17orf97
chr20	586984	587012	1	-0.175735	NA
chr20	621665	621666	1	-0.256863	NA
chr2	624764	624765	1	-0.328431	NA
chr11	676706	676707	1	-0.284188	AC131934,1
chr11	676706	676707	1	-0.284188	DEAF1
chr19	682804	682895	1	-0.10555	FSTL3
chr12	758148	758727	2	-0.123057	WNK1
chr19	869956	869957	1	-0.389744	MED16
chr2	874094	874095	1	0.342105	NA
chr11	876377	876378	1	-0.332827	CHID1
chr20	878964	878993	1	-0.185033	ANGPT4
chr19	886559	886565	1	-0.258788	MED16
chr6	901898	901899	1	-0.271429	NA
chr20	976133	976134	1	-0.333333	RSPO4
chr4	992106	992107	1	-0.266667	IDUA
chr4	992106	992107	1	-0.266667	SLC26A1
chr20	995476	995477	1	-0.388889	RSPO4
chr2	1070426	1070427	1	-0.319853	SNTG2
chr4	1104406	1104407	1	-0.310256	RNF212
chr16	1111267	1111337	1	0.0917874	NA
chr11	1121729	1121730	1	-0.301948	NA
chr6	1155424	1155425	1	-0.275	NA
chr16	1160664	1160665	1	-0.34375	CACNA1H
chr18	1163036	1163037	1	-0.183983	AP000829,1
chr17	1193777	1193931	2	-0.0960815	ABR
chr11	1198401	1198402	1	0.405405	MUC5AC
chr16	1261214	1261269	1	0.222304	PRSS29P
chr2	1274263	1274264	1	0.180851	SNTG2
chr6	1294381	1294382	1	0.179487	NA
chr17	1299958	1299959	1	-0.352941	TRARG1
chr10	1359543	1359548	1	0.202582	ADARB2
chr10	1369897	1369898	1	0.346154	ADARB2
chr4	1416526	1416527	1	0.357576	NA
chr2	1421141	1421142	1	-0.248889	AC105450,1
chr2	1421141	1421142	1	-0.248889	TPO
chr10	1440902	1440903	1	-0.263214	ADARB2
chr11	1453157	1453158	1	-0.333333	BRSK2
chr20	1491025	1491099	1	-0.291047	SIRPB2
chr17	1617891	1617892	1	-0.340426	SLC43A2
chr18	1647160	1647239	1	-0.241313	AP005262,2
chr19	1668163	1668164	1	0.145425	NA
chr16	1708970	1708971	1	-0.264706	MAPK8IP3
chr10	1778049	1778050	1	-0.296296	NA
chr16	1779120	1779121	1	-0.275641	EME2
chr16	1779120	1779121	1	-0.275641	SPSB3
chr17	1910235	1910236	1	-0.331933	NA
chr11	1914178	1914179	1	-0.261905	NA
chr18	1934407	1934408	1	-0.296154	AP005230,1
chr18	1934407	1934408	1	-0.296154	AP005262,2
chr16	1939555	1939556	1	-0.317814	MSRB1
chr17	1966538	1966539	1	-0.354839	RTN4RL1
chr18	2002433	2002434	1	-0.196477	AP005230,1
chr18	2002433	2002434	1	-0.196477	AP005262,2
chr11	2021031	2021032	1	-0.310345	NA
chr20	2044296	2044297	1	-0.358696	NA
chr20	2103653	2103654	1	0.333333	STK35
chr8	2127785	2128002	1	0.124235	MYOM2
chr11	2203069	2203070	1	-0.307692	NA
chr2	2238506	2238511	1	-0.259259	MYT1L
chr10	2303351	2303378	2	-0.157204	NA
chr20	2314408	2314409	1	0.302231	AL121899,2
chr20	2314408	2314409	1	0.302231	TGM3
chr16	2422742	2422883	1	-0.143386	ABCA17P
chr11	2450614	2450633	2	-0.229339	KCNQ1
chr8	2511294	2511345	1	-0.0990447	AC245519,1
chr20	2641375	2641376	1	-0.354489	TMC2
chr19	2706953	2706954	1	-0.357143	NA
chr10	2708538	2708539	1	-0.315646	NA
chr4	2763927	2763982	3	0.24647	NA
chr17	2808703	2808704	1	-0.287037	AC002316,1
chr6	2843300	2843301	1	0.261905	NA
chr8	2851215	2851216	1	0.143461	NA
chr10	2947634	2947635	1	-0.291525	NA
chr11	2955878	2955879	1	0.275641	NAP1L4
chr20	2986784	2986819	1	0.301291	PTPRA
chr10	3028839	3028840	1	-0.270833	NA
chr17	3029816	3029832	1	-0.208475	AC002316,1
chr12	3049751	3050141	1	-0.256944	NA
chr16	3065173	3065174	1	-0.333333	NA
chr2	3090075	3090076	1	-0.12783	LINC01250
chr18	3092817	3092818	1	-0.242563	MYOM1
chr12	3118954	3120469	1	-0.106831	TSPAN9
chr2	3139707	3139708	1	-0.461905	AC019118,2
chr20	3172769	3172770	1	0.416667	LZTS3
chr17	3212211	3212212	1	-0.123106	OR1A1
chr8	3241720	3241721	1	-0.275194	CSMD1
chr4	3469787	3469788	1	-0.322581	DOK7
chr4	3481546	3481547	1	0.326087	DOK7
chr2	3532948	3532949	1	-0.3125	AC108488,1
chr2	3532948	3532949	1	-0.3125	AC108488,2
chr16	3533900	3533901	1	-0.416667	AC004494,2
chr16	3533900	3533901	1	-0.416667	CLUAP1
chr12	3575295	3575506	1	-0.127127	PRMT8
chr17	3595258	3595271	1	-0.23252	AC027796,3
chr17	3595258	3595271	1	-0.23252	TRPV1
chr17	3606634	3606635	1	0.38756	AC027796,3
chr17	3606634	3606635	1	0.38756	TRPV1
chr6	3620994	3620995	1	-0.230603	AL033523,1
chr1	3679231	3679232	1	0.163767	TP73
chr4	3796780	3796781	1	-0.242105	NA
chr10	3806690	3806810	2	-0.205556	NA
chr4	3864721	3864722	1	-0.307692	NA
chr6	3873925	3873926	1	-0.222527	AL391422,2
chr2	3888685	3888697	1	-0.193601	NA
chr16	3914934	3914951	1	-0.322967	NA
chr6	3948089	3948132	1	-0.0864529	NA
chr17	3957054	3957085	1	0.303647	ATP2A3
chr2	3998627	3998628	1	-0.309524	NA
chr2	4067333	4067459	1	-0.266129	NA
chr16	4345943	4345944	1	0.351351	CORO7-PAM16
chr16	4345943	4345944	1	0.351351	PAM16
chr16	4362188	4362189	1	-0.342857	CORO7
chr16	4362188	4362189	1	-0.342857	CORO7-PAM16
chr4	4366925	4366926	1	-0.260256	NSG1
chr8	4434075	4434076	1	-0.320707	CSMD1
chr10	4435888	4435889	1	-0.333333	NA
chr2	4462297	4462299	1	-0.26161	NA
chr17	4488752	4488753	1	-0.361111	NA
chr17	4642095	4642144	2	-0.370291	ALOX15
chr5	4650429	4650731	1	-0.0898623	AC106799,2
chr6	4679538	4679539	1	-0.363636	NA
chr10	4697989	4697990	1	-0.0897563	NA
chr4	4709123	4709124	1	-0.104519	STX18-AS1
chr19	4715959	4716039	2	-0.197209	DPP9
chr4	4743830	4743831	1	-0.326471	STX18-AS1
chr20	4754435	4754436	1	0.245143	NA
chr11	4758281	4758282	1	-0.0818468	MMP26
chr19	4762331	4762332	1	-0.375	NA
chr4	4858705	4858706	1	0.307692	NA
chr20	4907023	4907024	1	-0.229885	SLC23A2
chr12	4956884	4957276	1	-0.0958606	AC005906,2
chr19	4977849	4977870	1	-0.262755	KDM4B
chr2	4998160	4998161	1	-0.0810839	NA
chr11	5060649	5060650	1	0.228956	NA
chr10	5169109	5169252	1	-0.221869	AKR1C8P
chr8	5199090	5199091	1	-0.240495	NA
chr16	5209379	5209380	1	-0.275067	AC074051,5
chr2	5316463	5316464	1	-0.27451	NA
chr4	5339866	5339867	1	0.287719	STK32B
chr4	5403234	5403235	1	-0.247768	STK32B
chr8	5406089	5406090	1	-0.353383	NA
chr10	5432424	5432425	1	-0.168687	NET1
chr8	5433403	5433404	1	0.254873	NA
chr4	5459426	5459427	1	-0.296188	STK32B
chr10	5459655	5459656	1	-0.290274	NA
chr18	5472746	5472747	1	-0.290323	AP005059,2
chr18	5472746	5472747	1	-0.290323	EPB41L3
chr18	5526024	5526025	1	-0.322511	EPB41L3
chr11	5533787	5533788	1	-0.291667	AC104389,5
chr10	5587209	5587372	2	-0.352774	NA
chr16	5594308	5594309	1	0.420455	RBFOX1
chr11	5600478	5600484	1	0.331927	AC104389,5
chr11	5600478	5600484	1	0.331927	TRIM6
chr11	5600478	5600484	1	0.331927	TRIM6-TRIM34
chr16	5601546	5601571	1	-0.280357	LINC01570
chr16	5601546	5601571	1	-0.280357	RBFOX1
chr8	5672072	5672235	1	-0.180083	NA
chr8	5702451	5702452	1	-0.258772	NA
chr4	5766933	5767055	1	-0.195402	CRMP1
chr4	5766933	5767055	1	-0.195402	EVC
chr8	5780866	5780867	1	-0.146051	NA
chr17	5788584	5788599	1	-0.164686	AC007846,1
chr17	5788584	5788599	1	-0.164686	AC007846,2
chr17	5823009	5823010	1	-0.27451	AC007846,1
chr17	5823009	5823010	1	-0.27451	AC007846,2
chr6	5855221	5855222	1	-0.384783	AL136307,1
chr4	5918324	5918325	1	-0.279762	C4orf50
chr8	5938495	5938496	1	0.28465	NA
chr2	5989901	5989902	1	-0.346154	SILC1
chr19	6118063	6118064	1	-0.0916682	AC011444,3
chr19	6118063	6118064	1	-0.0916682	RFX2
chr16	6224614	6224615	1	0.263889	RBFOX1
chr20	6252942	6252943	1	-0.308333	NA
chr11	6286966	6286967	1	0.352632	NA
chr8	6390167	6390168	1	-0.287879	NA
chr18	6441960	6441961	1	-0.109292	NA
chr11	6466663	6466664	1	-0.13598	TRIM3
chr16	6499554	6499555	1	-0.265934	RBFOX1
chr20	6513304	6513305	1	0.134502	CASC20
chr18	6521387	6521388	1	-0.122196	LINC01387
chr2	6541445	6541539	2	-0.211818	NA
chr18	6666320	6666321	1	-0.25641	NA
chr8	6680668	6680669	1	-0.201754	MCPH1-AS1
chr11	6726372	6726373	1	-0.0805905	GVINP1
chr4	6760660	6760835	1	-0.178941	NA
chr20	6860911	6860912	1	-0.294737	NA
chr16	6925521	6925673	1	-0.214286	RBFOX1
chr16	6941919	6941920	1	-0.277778	RBFOX1
chr8	6943786	6943787	1	0.281513	NA
chr8	6964517	6964518	1	0.226786	NA
chr2	7010524	7010627	1	0.240912	RNF144A
chr5	7023192	7025565	1	-0.134503	LINC02196
chr18	7029588	7029589	1	-0.333333	LAMA1
chr4	7050607	7050608	1	-0.322581	TADA2B
chr16	7087255	7087342	1	-0.266996	RBFOX1
chr16	7103494	7103495	1	-0.217117	RBFOX1
chr11	7137617	7137618	1	-0.190126	NA
chr12	7165009	7165535	2	-0.178107	NA
chr20	7214549	7214589	1	-0.297888	LINC01428
chr2	7220079	7220080	1	-0.116071	NA
chr19	7221073	7221074	1	-0.304348	INSR
chr11	7349774	7349775	1	-0.266667	SYT9
chr11	7427006	7427007	1	-0.238636	AC107884,1
chr11	7427006	7427007	1	-0.238636	SYT9
chr11	7429535	7429536	1	-0.36855	AC107884,1
chr11	7429535	7429536	1	-0.36855	SYT9
chr4	7435539	7435579	1	-0.222997	SORCS2
chr17	7478656	7478657	1	0.390805	ZBTB4
chr10	7501176	7501177	1	-0.246032	NA
chr20	7515117	7515118	1	-0.313321	NA
chr6	7521315	7521316	1	-0.277409	NA
chr4	7527152	7527153	1	-0.32	SORCS2
chr8	7536839	7536840	1	0.496622	NA
chr6	7546610	7546718	1	-0.137278	DSP
chr10	7551985	7551986	1	-0.325758	NA
chr6	7571964	7571965	1	-0.246225	DSP
chr11	7575067	7575110	1	-0.16219	PPFIBP2
chr16	7609657	7609658	1	-0.327273	RBFOX1
chr16	7614874	7614875	1	-0.279481	AC005774,2
chr16	7614874	7614875	1	-0.279481	RBFOX1
chr11	7656656	7656657	1	-0.352941	PPFIBP2
chr20	7675562	7675563	1	-0.0907103	NA
chr11	7766995	7767052	1	-0.163254	AC044810,2
chr11	7766995	7767052	1	-0.163254	AC044810,3
chr17	7798163	7798420	1	-0.251128	DNAH2
chr11	7844488	7844489	1	-0.239011	AC044810,2
chr11	7844488	7844489	1	-0.239011	AC044810,3
chr11	7856945	7856946	1	0.187419	AC044810,2
chr11	7856945	7856946	1	0.187419	AC044810,3
chr4	7907083	7907084	1	-0.433333	AFAP1
chr6	7923879	7923880	1	-0.243472	BLOC1S5-TXNDC5
chr6	7956337	7956338	1	-0.13733	BLOC1S5-TXNDC5
chr16	7999996	8000009	2	-0.34375	AC093515,1
chr17	8020533	8020534	1	0.375	NA
chr4	8024302	8024303	1	0.466667	ABLIM2
chr10	8057859	8057860	1	0.386628	GATA3
chr11	8072729	8072730	1	-0.316312	TUB
chr18	8180919	8180920	1	-0.37037	PTPRM
chr4	8227683	8227691	2	0.346939	SH3TC1
chr4	8282487	8282488	1	-0.310345	HTRA3
chr19	8384287	8384288	1	-0.371429	RAB11B-AS1
chr4	8393660	8393845	1	-0.253516	ACOX3
chr17	8438027	8438028	1	-0.351351	NDEL1
chr10	8480254	8480255	1	-0.287719	NA
chr16	8493271	8493280	1	-0.325	NA
chr2	8519558	8519559	1	-0.285714	LINC01814
chr4	8526468	8526469	1	-0.34375	NA
chr8	8537976	8537977	1	0.160445	NA
chr4	8553018	8553034	1	-0.314538	NA
chr8	8604601	8604602	1	-0.256236	NA
chr18	8646693	8646694	1	-0.265182	NA
chr8	8684341	8684342	1	-0.272237	NA
chr18	8695065	8695066	1	-0.333333	NA
chr19	8698375	8698376	1	0.344828	ACTL9
chr17	8716224	8716234	1	-0.26454	NA
chr8	8765994	8765995	1	-0.282171	AC087269,1
chr20	8830095	8830101	1	-0.212585	PLCB1
chr6	8851483	8851484	1	-0.320922	HULC
chr4	8864302	8864303	1	-0.309091	HMX1
chr18	8870140	8870175	1	-0.221569	NA
chr20	8964158	8964159	1	-0.363636	PLCB1
chr10	9030354	9030355	1	-0.325714	NA
chr11	9033755	9033762	1	-0.303704	AC079296,1
chr11	9033755	9033762	1	-0.303704	SCUBE2
chr20	9041436	9041437	1	-0.268717	NA
chr17	9084471	9084472	1	-0.314286	NTN1
chr20	9092080	9092264	2	-0.179222	PLCB4
chr20	9102135	9102136	1	-0.277778	PLCB4
chr10	9125343	9125344	1	-0.149358	NA
chr21	9140636	9140668	1	-0.0921401	NA
chr8	9201363	9201364	1	-0.227273	AC022784,1
chr2	9229925	9229926	1	-0.242308	ASAP2
chr10	9234290	9234291	1	-0.207393	NA
chr2	9259749	9259750	1	-0.269231	ASAP2
chr10	9261717	9261718	1	-0.252362	NA
chr16	9276052	9276053	1	-0.334038	NA
chr16	9287224	9287225	1	0.313725	NA
chr21	9340471	9340472	1	0.333333	CR381653,1
chr8	9388531	9388532	1	-0.29207	AC021242,2
chr8	9388531	9388532	1	-0.29207	AC022784,1
chr20	9410486	9410487	1	0.415966	PLCB4
chr10	9663537	9663567	1	-0.255675	NA
chr16	9764547	9764548	1	-0.310345	GRIN2A
chr17	9764862	9764863	1	-0.403743	AC027045,2
chr6	9829708	9829709	1	-0.333333	OFCC1
chr17	9841585	9841586	1	-0.30444	GLP2R
chr4	9874500	9874569	1	-0.199586	SLC2A9
chr6	9910363	9910364	1	-0.201754	OFCC1
chr4	9944651	9944652	1	-0.4	SLC2A9
chr20	9980025	9980150	1	-0.21241	NA
chr16	10023143	10023144	1	-0.270677	GRIN2A
chr4	10032406	10032407	1	-0.236111	SLC2A9
chr5	10032800	10033059	1	-0.131232	NA
chr16	10055761	10055762	1	-0.28988	GRIN2A
chr4	10060701	10060702	1	0.196071	NA
chr16	10072661	10072662	1	0.270035	GRIN2A
chr17	10086222	10086223	1	-0.32971	AC005747,1
chr18	10144207	10144208	1	-0.363636	AP005271,1
chr4	10146751	10146752	1	-0.257658	NA
chr10	10175263	10175264	1	-0.0929774	NA
chr6	10196976	10196977	1	-0.20647	OFCC1
chr6	10213411	10213575	1	-0.103317	NA
chr16	10226953	10226954	1	0.238356	AC022168,1
chr11	10250295	10250296	1	0.289024	SBF2
chr11	10370831	10370832	1	-0.270833	AMPD3
chr12	10382236	10382484	1	-0.0902494	AC022075,1
chr12	10382236	10382484	1	-0.0902494	KLRC4-KLRK1
chr12	10382236	10382484	1	-0.0902494	KLRK1
chr18	10413561	10413681	1	-0.247198	AP006219,3
chr18	10413561	10413681	1	-0.247198	LINC01254
chr18	10435693	10435694	1	-0.232867	NA
chr10	10440731	10440891	1	-0.134649	CELF2-DT
chr10	10451770	10451771	1	0.180976	CELF2-DT
chr17	10491052	10491099	1	-0.189216	AC005323,2
chr17	10491052	10491099	1	-0.189216	MYHAS
chr8	10551538	10551539	1	-0.387255	PRSS55
chr11	10568736	10568748	1	-0.235503	LYVE1
chr11	10568736	10568748	1	-0.235503	MRVI1-AS1
chr17	10572735	10572736	1	-0.351103	MYHAS
chr12	10582514	10582890	2	-0.0880585	NA
chr4	10598016	10598017	1	-0.247024	CLNK
chr11	10601052	10601053	1	-0.360502	LYVE1
chr11	10601052	10601053	1	-0.360502	MRVI1
chr17	10607729	10607730	1	-0.099028	AC005323,1
chr17	10607729	10607730	1	-0.099028	MYHAS
chr2	10619009	10619010	1	-0.289474	NOL10
chr4	10622751	10622752	1	0.34127	CLNK
chr8	10630721	10630722	1	0.244055	RP1L1
chr8	10632079	10632352	2	0.103388	RP1L1
chr6	10644199	10644200	1	-0.0847301	NA
chr18	10652039	10652040	1	-0.216017	NA
chr8	10673917	10673918	1	-0.359664	C8orf74
chr8	10673917	10673918	1	-0.359664	RP1L1
chr18	10690759	10690760	1	-0.322072	PIEZO2
chr19	10697691	10697692	1	-0.467914	NA
chr8	10745089	10745091	1	-0.194712	AC105001,1
chr8	10745089	10745091	1	-0.194712	PINX1
chr16	10765559	10765560	1	-0.269841	NUBP1
chr16	10765559	10765560	1	-0.269841	TVP23A
chr4	10785502	10785504	1	-0.172673	NA
chr17	10802353	10802354	1	-0.25	AC015908,6
chr17	10802353	10802354	1	-0.25	AC015908,7
chr17	10802353	10802354	1	-0.25	TMEM220-AS1
chr17	10802353	10802354	1	-0.25	TMEM238L
chr16	10809469	10809470	1	-0.294444	TVP23A
chr2	10861165	10861166	1	0.303419	LINC01954
chr4	10883488	10883489	1	-0.289575	NA
chr20	10895576	10895577	1	-0.393939	AL050403,1
chr20	10895576	10895577	1	-0.393939	AL050403,2
chr16	10914065	10914066	1	-0.289474	CIITA
chr18	10927301	10927302	1	-0.253333	PIEZO2
chr18	10967703	10967705	1	-0.0940263	PIEZO2
chr4	10976134	10976135	1	-0.263889	NA
chr8	11039005	11039006	1	-0.405594	XKR6
chr18	11069659	11069660	1	-0.176471	PIEZO2
chr6	11151198	11151199	1	-0.305627	NA
chr10	11162876	11162877	1	-0.308333	CELF2
chr11	11163013	11163014	1	-0.318681	LINC02752
chr16	11203597	11203598	1	-0.242947	AC007220,1
chr17	11207718	11207729	1	-0.25188	AC005548,1
chr18	11240429	11240431	1	-0.157991	NA
chr10	11242585	11242586	1	-0.413793	CELF2
chr16	11254272	11254304	1	-0.288889	RMI2
chr8	11254931	11254932	1	-0.295045	LINC00529
chr20	11256766	11256767	1	-0.316667	AL049649,1
chr4	11256915	11256916	1	-0.220779	NA
chr11	11305312	11305313	1	-0.262554	GALNT18
chr11	11308199	11308200	1	-0.342424	GALNT18
chr10	11308806	11308807	1	-0.158696	CELF2
chr10	11337555	11337575	1	0.286415	NA
chr20	11352793	11352794	1	-0.344988	NA
chr16	11370619	11370620	1	0.354545	AC099489,1
chr16	11370619	11370620	1	0.354545	RMI2
chr17	11394620	11394621	1	-0.090231	SHISA6
chr16	11431880	11431881	1	-0.405405	AC099489,1
chr18	11435446	11435447	1	-0.166667	NA
chr17	11440763	11440764	1	-0.257143	SHISA6
chr8	11442750	11442751	1	-0.352941	FAM167A
chr20	11528690	11528691	1	-0.105422	NA
chr17	11559754	11559755	1	-0.306911	SHISA6
chr10	11600247	11600248	1	-0.339367	USP6NL
chr11	11606279	11606280	1	-0.313853	GALNT18
chr6	11634855	11634856	1	-0.308523	NA
chr18	11649890	11649891	1	-0.234962	NA
chr11	11658584	11658585	1	-0.246552	NA
chr5	11681695	11682167	2	-0.233621	CTNND2
chr20	11732303	11732304	1	-0.221818	NA
chr6	11756222	11756223	1	-0.288095	ADTRP
chr10	11845080	11845081	1	-0.293706	PROSER2
chr6	11850093	11850094	1	-0.291667	NA
chr2	11850260	11850261	1	-0.424242	MIR3681HG
chr19	11915890	11915891	1	-0.237755	NA
chr20	11926212	11926213	1	-0.32807	BTBD3
chr4	11938859	11938860	1	-0.270936	NA
chr8	12009776	12009777	1	-0.254902	AC107918,4
chr4	12028363	12028364	1	-0.17566	NA
chr16	12049613	12049614	1	-0.233918	SNX29
chr4	12075357	12075358	1	-0.301248	NA
chr11	12146267	12146268	1	-0.193182	MICAL2
chr20	12156411	12156412	1	-0.371429	NA
chr6	12163711	12163712	1	-0.259259	HIVEP1
chr4	12234720	12234869	1	-0.100837	LINC02270
chr11	12294095	12294114	1	-0.227113	MICAL2
chr8	12381108	12381109	1	-0.534562	FAM66A
chr4	12484744	12484745	1	-0.0854582	NA
chr17	12508548	12508549	1	-0.338095	NA
chr16	12510996	12510997	1	-0.280303	SNX29
chr16	12524073	12524074	1	-0.276018	SNX29
chr11	12553115	12553116	1	-0.239496	NA
chr4	12584183	12584184	1	-0.128261	NA
chr4	12589614	12589615	1	-0.210744	NA
chr4	12601025	12601026	1	-0.188746	NA
chr10	12615012	12615013	1	-0.322093	CAMK1D
chr16	12621062	12621063	1	-0.413043	NA
chr16	12686027	12686028	1	0.410256	CPPED1
chr17	12763230	12763231	1	-0.451613	AC005358,1
chr17	12763230	12763231	1	-0.451613	MYOCD
chr20	12775198	12775249	1	0.114615	NA
chr4	12805305	12805306	1	0.166778	NA
chr11	12820244	12820245	1	-0.318815	TEAD1
chr18	12884840	12884885	2	0.248279	PTPN2
chr11	12997388	12997389	1	-0.348837	NA
chr19	13060872	13060873	1	0.281834	NFIX
chr11	13146589	13146590	1	-0.327696	NA
chr10	13170537	13170538	1	-0.298942	MCM10
chr11	13251952	13251953	1	-0.278195	NA
chr16	13269276	13269281	1	-0.277679	U91319,1
chr8	13301922	13301923	1	-0.285354	DLC1
chr19	13471899	13471900	1	-0.347619	CACNA1A
chr12	13523889	13524454	1	-0.104353	GRIN2B
chr10	13545671	13545673	1	-0.0861345	NA
chr18	13552048	13552049	1	-0.303297	LDLRAD4
chr10	13569766	13569803	1	-0.100175	NA
chr10	13659521	13659522	1	0.333333	AL157392,3
chr10	13659521	13659522	1	0.333333	FRMD4A
chr17	13670512	13670642	1	-0.142985	NA
chr2	13691262	13691264	1	-0.27709	NA
chr17	13692815	13692816	1	-0.203704	NA
chr17	13694683	13694684	1	-0.099359	NA
chr4	13748356	13748366	1	-0.234912	LINC01182
chr16	13776232	13776233	1	-0.190244	U95743,1
chr17	13827173	13827174	1	-0.323077	COX10-AS1
chr4	13935777	13935861	1	-0.192336	LINC01182
chr6	13950167	13950331	1	-0.208429	RNF182
chr4	13958565	13958676	1	0.185868	LINC01182
chr10	13966727	13966728	1	-0.38	FRMD4A
chr17	13969528	13969529	1	0.208382	COX10-AS1
chr16	13970303	13970304	1	-0.4	NA
chr19	14053030	14053031	1	-0.19582	IL27RA
chr8	14053238	14053239	1	-0.184	NA
chr17	14065867	14065868	1	-0.173062	COX10-AS1
chr11	14075364	14075365	1	0.3125	SPON1
chr10	14102161	14102162	1	-0.309091	FRMD4A
chr10	14125554	14125555	1	-0.324675	FRMD4A
chr10	14177754	14177755	1	-0.287115	FRMD4A
chr11	14437272	14437273	1	0.128297	NA
chr18	14451947	14451948	1	-0.095836	NA
chr20	14533901	14533902	1	-0.198344	MACROD2
chr8	14587436	14587437	1	-0.181345	SGCZ
chr17	14654828	14654829	1	0.0916086	NA
chr8	14655968	14656089	1	-0.109451	SGCZ
chr17	14762112	14762113	1	-0.161466	NA
chr6	14770130	14770131	1	-0.333333	AL138720,1
chr4	14827553	14827554	1	-0.310345	LINC00504
chr18	14842530	14842531	1	0.338828	ANKRD30B
chr20	14880974	14880975	1	-0.428571	MACROD2
chr17	14897021	14897022	1	-0.105831	LINC02096
chr2	14913394	14913395	1	-0.188737	AC068286,2
chr19	14920105	14920106	1	-0.352941	NA
chr4	14928572	14928573	1	-0.293605	CPEB2-DT
chr2	15059164	15059165	1	-0.265182	NA
chr11	15082912	15082913	1	-0.365646	NA
chr21	15093387	15093664	1	-0.145925	NA
chr6	15118629	15118630	1	-0.242698	NA
chr18	15133618	15133619	1	-0.294219	NA
chr2	15234707	15234708	1	-0.304762	NBAS
chr11	15257799	15257800	1	-0.256708	NA
chr10	15269199	15269200	1	-0.286869	FAM171A1
chr2	15297584	15297585	1	-0.28898	NBAS
chr8	15355062	15355063	1	-0.302387	NA
chr6	15362726	15362727	1	-0.207692	JARID2
chr19	15374132	15374133	1	-0.333333	AKAP8
chr11	15398596	15398597	1	-0.164258	NA
chr11	15451618	15451619	1	-0.275	NA
chr8	15503720	15503721	1	-0.230183	TUSC3
chr16	15509247	15509256	1	-0.323755	AC140504,1
chr16	15509247	15509256	1	-0.323755	BMERB1
chr21	15553621	15554906	1	-0.152246	AJ009632,2
chr17	15618682	15618683	1	0.48048	AC005324,3
chr17	15618682	15618683	1	0.48048	CDRT1
chr11	15620986	15621165	1	-0.185768	AC073172,1
chr11	15620986	15621165	1	-0.185768	AC087379,2
chr20	15672387	15672388	1	-0.25	MACROD2
chr20	15718278	15718452	1	-0.242351	MACROD2
chr11	15727068	15727069	1	-0.352941	AC087379,1
chr16	15762765	15762766	1	-0.328571	MYH11
chr4	15768700	15768719	1	-0.285606	NA
chr6	15837548	15837549	1	-0.305497	NA
chr17	15851613	15851614	1	-0.34413	SPECC1P1
chr11	15861505	15861506	1	-0.199301	NA
chr4	15967510	15967511	1	-0.2625	FGFBP2
chr4	15967510	15967511	1	-0.2625	PROM1
chr10	15975098	15975099	1	-0.328571	NA
chr20	16043111	16043112	1	-0.290598	MACROD2
chr4	16145742	16145743	1	-0.331373	NA
chr4	16168542	16168543	1	-0.240891	TAPT1
chr10	16257070	16257071	1	-0.281567	NA
chr11	16446396	16446625	2	-0.080928	SOX6
chr2	16455064	16455065	1	-0.280051	NA
chr4	16456647	16456648	1	-0.309091	AC097515,1
chr11	16505419	16505420	1	-0.196257	SOX6
chr16	16547230	16547231	1	-0.101416	AC136431,1
chr22	16697757	16697758	1	-0.285714	TPTEP1
chr22	16697757	16697758	1	-0.285714	VWFP1
chr19	16768971	16769059	1	-0.144124	NWD1
chr17	16815460	16815461	1	-0.375	AC098850,4
chr11	16864734	16864735	1	-0.301706	PLEKHA7
chr16	16892826	16892827	1	-0.30303	NA
chr20	16935180	16935309	1	-0.140526	NA
chr17	16958530	16958531	1	-0.0880521	TNFRSF13B
chr8	16978493	16978494	1	-0.125888	NA
chr6	17024683	17024684	1	-0.154318	AL133405,1
chr20	17078624	17078625	1	-0.22156	NA
chr17	17106924	17106925	1	-0.245854	MPRIP
chr12	17128537	17128778	1	-0.205016	AC092110,1
chr2	17135442	17135443	1	-0.104859	NA
chr4	17143515	17143516	1	-0.26146	NA
chr2	17155187	17155326	1	-0.145673	NA
chr2	17161343	17161344	1	-0.337165	NA
chr20	17274285	17274286	1	-0.287719	PCSK2
chr11	17397677	17397693	2	-0.372549	ABCC8
chr2	17410304	17410305	1	-0.234994	NA
chr19	17414761	17414762	1	-0.27971	AC010319,4
chr19	17414761	17414762	1	-0.27971	BISPR
chr19	17414761	17414762	1	-0.27971	MVB12A
chr2	17435630	17435631	1	-0.204082	NA
chr11	17452989	17452990	1	-0.275253	ABCC8
chr2	17454046	17454047	1	-0.294038	NA
chr8	17522912	17522913	1	-0.234359	SLC7A2
chr11	17527965	17527966	1	-0.25731	USH1C
chr4	17547700	17547701	1	-0.28252	NA
chr11	17628478	17628479	1	-0.166138	OTOG
chr11	17650720	17650721	1	-0.383333	NA
chr17	17683479	17683480	1	0.454545	RAI1
chr8	17773237	17773278	1	-0.157497	MTUS1
chr17	17809368	17809369	1	-0.285714	RAI1
chr17	17819219	17819220	1	-0.3125	SREBF1
chr20	17826192	17826193	1	-0.2875	NA
chr20	17866341	17866342	1	-0.291667	NA
chr19	17949517	17949518	1	0.3	NA
chr20	17962678	17962679	1	-0.286275	OVOL2
chr20	17962678	17962679	1	-0.286275	SNX5
chr10	17970219	17970220	1	-0.186265	SLC39A12
chr16	18012987	18012988	1	-0.29517	AC010601,1
chr16	18012987	18012988	1	-0.29517	AC091489,1
chr20	18031241	18031242	1	-0.296992	OVOL2
chr19	18031647	18031710	1	0.214258	AC020904,2
chr10	18051479	18051480	1	0.151239	NA
chr19	18088850	18088851	1	-0.299335	IL12RB1
chr17	18113567	18113568	1	-0.266667	MYO15A
chr22	18157793	18157794	1	-0.319328	USP18
chr17	18172975	18172976	1	-0.366667	AC087164,1
chr17	18172975	18172976	1	-0.366667	MYO15A
chr6	18261203	18261204	1	-0.23913	DEK
chr8	18283502	18283503	1	-0.357143	NA
chr10	18305190	18305191	1	-0.234921	CACNB2
chr2	18343623	18343624	1	-0.150216	KCNS3
chr6	18357286	18357287	1	-0.215488	NA
chr11	18365480	18365481	1	-0.264706	GTF2H1
chr4	18379050	18379051	1	-0.340426	NA
chr2	18389794	18389795	1	-0.259615	NA
chr5	18409028	18409791	2	-0.228238	NA
chr19	18475207	18475579	2	-0.16169	ELL
chr4	18490666	18490683	1	-0.105874	AC093898,1
chr14	18542494	18542495	1	-0.281481	NA
chr19	18557796	18558369	1	0.247951	AC005253,1
chr19	18557796	18558369	1	0.247951	KXD1
chr4	18566084	18566085	1	-0.255556	AC093898,1
chr13	18639140	18639141	1	-0.140469	NA
chr13	18670785	18670786	1	0.275	NA
chr17	18709336	18709337	1	-0.239362	TRIM16L
chr20	18724975	18724976	1	-0.250758	AL121900,1
chr20	18724975	18724976	1	-0.250758	DTD1
chr11	18750021	18750022	1	-0.294118	PTPN5
chr9	18752720	18752721	1	-0.278719	ADAMTSL1
chr4	18788080	18788232	1	-0.176921	AC093898,1
chr8	18854254	18854333	1	0.306878	PSD3
chr20	18878111	18878112	1	0.118973	NA
chr11	18890015	18890016	1	-0.227513	NA
chr4	18890542	18890543	1	-0.208539	NA
chr19	18892107	18892235	1	-0.185185	CERS1
chr19	18892107	18892235	1	-0.185185	GDF1
chr19	18922112	18922113	1	-0.307692	AC002985,1
chr19	18922112	18922113	1	-0.307692	DDX49
chr11	18932723	18932724	1	-0.206921	NA
chr20	18942290	18942291	1	-0.189283	NA
chr10	18954752	18954753	1	0.2575	NA
chr11	18967373	18967419	1	-0.22766	NA
chr13	18991632	18991660	1	-0.211336	PHF2P2
chr10	19007182	19007308	1	-0.269643	NA
chr16	19045832	19045967	1	-0.148407	TMC7
chr2	19071687	19071688	1	-0.255405	LINC01376
chr20	19072089	19072090	1	0.288032	NA
chr10	19158076	19158077	1	-0.299107	MALRD1
chr2	19165498	19165499	1	-0.24537	LINC01376
chr19	19167828	19167829	1	-0.352227	BORCS8-MEF2B
chr19	19167828	19167829	1	-0.352227	MEF2B
chr13	19178644	19178645	1	0.425	TUBA3C
chr20	19186773	19186775	1	-0.157429	NA
chr20	19229660	19229661	1	-0.121197	SLC24A3
chr13	19296654	19296656	1	-0.207417	ANKRD26P3
chr2	19310219	19310220	1	-0.271429	LINC01376
chr17	19347860	19347861	1	-0.37037	B9D1
chr6	19355041	19355042	1	0.277526	LNC-LBCS
chr13	19384886	19384887	1	-0.419355	PARP4P2
chr16	19399680	19399681	1	-0.237097	AC130456,2
chr19	19407528	19407529	1	-0.341954	GATAD2A
chr19	19417262	19417263	1	-0.247738	GATAD2A
chr8	19431475	19431476	1	-0.162903	CSGALNACT1
chr8	19452185	19452211	1	-0.175997	CSGALNACT1
chr16	19458441	19458442	1	-0.258824	TMC5
chr14	19471562	19471563	1	-0.303571	NA
chr19	19495870	19495871	1	-0.346154	GATAD2A
chr2	19501394	19501514	1	-0.212079	LINC01808
chr4	19501643	19501644	1	-0.269355	AC024230,1
chr19	19598885	19598886	1	0.583333	PBX4
chr11	19611165	19611166	1	-0.281915	NAV2
chr6	19627575	19627576	1	-0.0907688	LNC-LBCS
chr13	19684311	19684312	1	-0.200535	PSPC1
chr10	19704265	19704266	1	-0.240896	MALRD1
chr20	19751109	19751110	1	-0.317814	NA
chr20	19762984	19762999	1	-0.29798	RIN2
chr14	19801272	19801292	1	-0.160298	OR4N2
chr10	19802014	19802015	1	-0.0948095	NA
chr2	19871451	19871452	1	-0.281988	LINC00954
chr14	19905347	19905348	1	-0.299043	NA
chr4	19951881	19951882	1	-0.293086	NA
chr19	19972107	19972108	1	-0.144985	NA
chr6	20000188	20000189	1	-0.225581	NA
chr21	20006022	20006273	1	-0.0866667	NA
chr20	20107825	20107826	1	-0.298886	CFAP61
chr11	20116753	20116754	1	-0.278195	NAV2
chr11	20136380	20136381	1	-0.328571	NA
chr4	20156643	20156644	1	-0.296846	NA
chr10	20158195	20158311	1	-0.237976	PLXDC2
chr16	20171330	20171331	1	-0.273954	NA
chr8	20195127	20195128	1	-0.179138	NA
chr10	20216253	20216254	1	-0.0833296	PLXDC2
chr4	20253721	20253750	2	0.2657	SLIT2
chr12	20316862	20316863	1	-0.361472	NA
chr16	20381266	20381267	1	-0.285714	PDILT
chr13	20388819	20388820	1	-0.263889	NA
chr20	20397779	20397780	1	-0.352941	RALGAPA2
chr14	20427633	20427643	1	0.235679	KLHL33
chr17	20472108	20472109	1	-0.333333	NA
chr2	20487389	20487390	1	-0.32807	NA
chr4	20504341	20504342	1	-0.352941	SLIT2
chr2	20508118	20508119	1	-0.351351	NA
chr10	20542788	20542789	1	-0.285714	NA
chr19	20573628	20573629	1	0.0900453	AC010636,2
chr19	20664543	20664591	2	0.252665	NA
chr20	20724732	20724733	1	-0.187719	NA
chr4	20732341	20732342	1	-0.431818	KCNIP4
chr4	20732341	20732342	1	-0.431818	PACRGL
chr4	20734704	20734705	1	-0.1875	KCNIP4
chr4	20734704	20734705	1	-0.1875	PACRGL
chr4	20741538	20741539	1	-0.132754	KCNIP4
chr4	20741538	20741539	1	-0.132754	PACRGL
chr8	20789926	20789929	1	0.252358	NA
chr12	20830051	20830175	1	-0.105909	SLCO1B3
chr12	20830051	20830175	1	-0.105909	SLCO1B3-SLCO1B7
chr4	20848718	20848719	1	-0.092909	KCNIP4
chr11	20878157	20878158	1	-0.333333	NELL1
chr2	20884157	20884158	1	0.244231	NA
chr16	20990505	20990506	1	-0.285714	DNAH3
chr19	20992283	20992284	1	-0.358974	NA
chr4	20994311	20994312	1	-0.1856	KCNIP4
chr14	21026003	21026025	1	0.125797	AL161668,4
chr14	21026003	21026025	1	0.125797	NDRG2
chr14	21026003	21026025	1	0.125797	TPPP2
chr16	21052973	21053108	2	-0.337041	DNAH3
chr19	21091873	21091874	1	-0.411765	ZNF714
chr13	21095807	21095808	1	-0.270833	NA
chr18	21131970	21131971	1	-0.333333	NA
chr4	21190834	21190835	1	-0.23273	KCNIP4
chr20	21222884	21222885	1	-0.261905	KIZ
chr8	21243175	21243176	1	-0.112661	AC021613,1
chr20	21245498	21245499	1	-0.388889	KIZ
chr14	21345922	21345923	1	-0.326531	RPGRIP1
chr6	21350616	21350617	1	-0.286713	NA
chr11	21363017	21363018	1	-0.52381	NELL1
chr4	21363931	21363932	1	-0.245931	KCNIP4
chr2	21419602	21419603	1	-0.250774	AC011752,1
chr2	21419602	21419603	1	-0.250774	AC018742,1
chr8	21434721	21434722	1	-0.141922	NA
chr18	21455273	21455344	2	-0.225029	GREB1L
chr8	21489050	21489051	1	-0.333333	NA
chr22	21572262	21572296	1	-0.217532	UBE2L3
chr2	21574087	21574088	1	-0.200994	AC018742,1
chr8	21580927	21580928	1	-0.266667	NA
chr4	21595293	21595353	1	-0.239472	AC096576,3
chr4	21595293	21595353	1	-0.239472	KCNIP4
chr22	21614566	21614567	1	-0.333333	UBE2L3
chr8	21684283	21684284	1	-0.284014	NA
chr2	21762487	21762488	1	-0.265873	AC018742,1
chr6	21802303	21802304	1	-0.272727	CASC15
chr4	21855691	21855756	1	-0.157373	KCNIP4
chr11	21892995	21892997	1	-0.211672	ANO5
chr20	21900893	21900894	1	0.184922	NA
chr4	21926221	21926256	1	-0.234417	KCNIP4
chr11	21934913	21934914	1	-0.235349	ANO5
chr4	22057322	22057323	1	-0.255952	AC096719,1
chr14	22149449	22149450	1	-0.301282	NA
chr19	22158396	22158397	1	-0.0897436	NA
chr4	22194611	22194612	1	-0.231975	AC096719,1
chr20	22208162	22208163	1	-0.269737	NA
chr11	22215171	22215173	1	-0.121057	ANO5
chr19	22238538	22238539	1	-0.339362	NA
chr14	22304485	22304548	2	-0.310272	AC244502,1
chr14	22304485	22304548	2	-0.310272	TRAV39
chr6	22321226	22321227	1	-0.116291	CASC15
chr4	22326754	22326755	1	-0.216312	AC096719,1
chr19	22330856	22330857	1	-0.26	NA
chr4	22350260	22350276	1	0.0976506	ADGRA3
chr4	22367196	22367197	1	-0.250246	ADGRA3
chr12	22406634	22407499	2	-0.17722	ST8SIA1
chr14	22460002	22460003	1	-0.361111	AC244502,1
chr17	22474936	22474937	1	-0.26454	NA
chr11	22507466	22507565	1	-0.0994211	AC055878,1
chr2	22511613	22511615	1	-0.258547	AC096570,1
chr2	22511613	22511615	1	-0.258547	LINC01884
chr22	22538382	22538474	1	-0.144526	NA
chr19	22559664	22559665	1	-0.22	NA
chr14	22566553	22566554	1	-0.354839	DAD1
chr17	22579119	22579120	1	-0.148268	NA
chr19	22611439	22611440	1	-0.419355	NA
chr4	22622931	22622932	1	-0.261905	NA
chr10	22634445	22634531	1	-0.153262	PIP4K2A
chr7	22758216	22758345	1	-0.13598	NA
chr14	22778729	22778730	1	-0.223011	SLC7A7
chr15	22802119	22802120	1	0.276361	NIPA1
chr20	22822377	22822378	1	-0.344444	NA
chr13	22837937	22837938	1	0.313853	NA
chr16	22849982	22849983	1	-0.37931	HS3ST2
chr16	22886128	22886129	1	0.37037	HS3ST2
chr16	22890756	22890757	1	-0.314035	HS3ST2
chr13	22912183	22912184	1	-0.0953248	LINC00621
chr10	22952897	22952898	1	-0.176466	ARMC3
chr15	22965884	22965885	1	-0.296474	CYFIP1
chr18	22984311	22984312	1	0.258772	RBBP8
chr11	22987303	22987304	1	-0.300395	NA
chr22	22996335	22996336	1	-0.186757	AC245054,1
chr20	23080613	23080695	1	-0.217718	CD93
chr8	23108747	23108748	1	-0.265328	AC107959,5
chr8	23108747	23108748	1	-0.265328	TNFRSF10C
chr2	23110304	23110305	1	-0.246612	AC018467,1
chr19	23138425	23138426	1	-0.27971	ZNF730
chr2	23158574	23158575	1	0.339286	AC018467,1
chr14	23189187	23189188	1	-0.332432	RNF212B
chr15	23201109	23201110	1	0.129032	NA
chr16	23217623	23217624	1	-0.278431	NA
chr11	23227366	23227367	1	-0.233115	NA
chr19	23292364	23292365	1	0.0834496	NA
chr6	23297583	23297584	1	-0.447368	NA
chr18	23330604	23330708	1	-0.210728	TMEM241
chr5	23335514	23335859	1	-0.0914043	NA
chr4	23361348	23361349	1	-0.390244	NA
chr14	23451606	23451607	1	-0.138567	NA
chr8	23460806	23460909	1	-0.105173	AC104561,1
chr11	23491810	23491811	1	-0.286713	NA
chr6	23507840	23507841	1	-0.243952	NA
chr20	23510394	23510395	1	-0.324074	AL109954,2
chr2	23514509	23514510	1	-0.303258	AC011239,1
chr2	23514509	23514510	1	-0.303258	KLHL29
chr22	23519913	23519914	1	-0.357143	NA
chr13	23526465	23526466	1	-0.287037	NA
chr2	23546834	23546835	1	-0.358865	KLHL29
chr19	23564505	23564506	1	-0.257143	ZNF675
chr14	23575071	23575072	1	-0.272321	JPH4
chr6	23582744	23582745	1	-0.28876	NA
chr6	23649266	23649267	1	-0.206723	NA
chr8	23713445	23713446	1	0.27051	AC012574,1
chr6	23728581	23728582	1	-0.256628	NA
chr4	23772345	23772346	1	-0.203509	PPARGC1A
chr10	23856670	23856671	1	-0.345238	KIAA1217
chr10	23896602	23896745	1	-0.207071	KIAA1217
chr22	23906271	23906272	1	-0.328273	AP000350,6
chr8	23947914	23947915	1	-0.111364	NA
chr19	23953373	23953374	1	-0.217949	AC011503,1
chr19	23955824	23955825	1	-0.277778	AC011503,1
chr8	23957350	23957351	1	-0.305317	NA
chr19	23974082	23974083	1	-0.0945231	NA
chr10	23976067	23976068	1	-0.306818	KIAA1217
chr13	23985280	23985281	1	-0.365854	AL359736,1
chr13	23985280	23985281	1	-0.365854	AL445985,1
chr13	23985280	23985281	1	-0.365854	SPATA13
chr2	24009691	24009692	1	0.492754	NA
chr4	24030229	24030230	1	-0.261905	NA
chr22	24165657	24165671	2	-0.309859	CABIN1
chr19	24191440	24191441	1	-0.328431	NA
chr19	24200634	24200635	1	-0.120581	NA
chr20	24203995	24203996	1	-0.309091	LINC01721
chr19	24240795	24240797	1	-0.103881	NA
chr16	24277300	24277301	1	-0.316667	CACNG3
chr21	24328764	24329904	1	-0.0987654	LINC01684
chr4	24328953	24328954	1	0.289575	NA
chr20	24338066	24338067	1	-0.291667	NA
chr11	24354551	24354552	1	-0.12161	NA
chr11	24355296	24355297	1	-0.251391	NA
chr13	24389390	24389391	1	-0.27521	NA
chr14	24404696	24404828	1	-0.181004	NYNRIN
chr18	24427397	24427398	1	0.36	IMPACT
chr22	24482484	24482485	1	-0.202366	ADORA2A-AS1
chr14	24529251	24529252	1	-0.124852	NA
chr21	24535308	24535805	1	-0.100329	LINC01684
chr20	24607759	24607760	1	-0.333333	SYNDIG1
chr11	24608408	24608409	1	-0.221538	LUZP2
chr20	24622134	24622135	1	-0.0994824	SYNDIG1
chr20	24629149	24629150	1	-0.292683	SYNDIG1
chr14	24647517	24647518	1	0.133363	AL136018,1
chr10	24709872	24709873	1	0.268142	ARHGAP21
chr10	24728918	24728919	1	-0.238636	NA
chr4	24735670	24735671	1	-0.342857	NA
chr10	24736336	24736337	1	-0.148387	NA
chr8	24748471	24748482	1	-0.274725	AC120193,1
chr8	24815095	24815096	1	-0.266667	AC120193,1
chr20	24834729	24834730	1	-0.342857	NA
chr11	24883238	24883248	1	-0.0826884	LUZP2
chr14	24886330	24886332	1	-0.210256	STXBP6
chr5	24934221	24935534	1	-0.0880873	NA
chr16	24986405	24986427	1	-0.142105	ARHGAP17
chr13	25043546	25043547	1	-0.375	NA
chr10	25054678	25054679	1	-0.0853031	AL512598,2
chr10	25054678	25054679	1	-0.0853031	ENKUR
chr11	25061973	25061974	1	-0.163476	LUZP2
chr20	25131645	25131646	1	-0.372549	NA
chr20	25140749	25140750	1	-0.301418	AL035252,3
chr20	25163382	25163383	1	-0.388889	NA
chr14	25182709	25182710	1	-0.27	NA
chr11	25230682	25230683	1	-0.226087	NA
chr22	25231727	25231728	1	-0.366667	CRYBB2
chr18	25293283	25293284	1	-0.205033	ZNF521
chr14	25308941	25309006	1	-0.286232	NA
chr6	25379046	25379047	1	-0.334091	CARMIL1
chr6	25379046	25379047	1	-0.334091	CMAHP
chr13	25469574	25469575	1	0.351613	ATP8A2
chr14	25490825	25490826	1	-0.270416	NA
chr11	25491030	25491031	1	-0.302392	NA
chr21	25491462	25492079	1	-0.117205	NA
chr13	25501292	25501337	1	-0.189022	ATP8A2
chr10	25520708	25520892	1	-0.0974359	GPR158
chr13	25521122	25521123	1	0.0976492	ATP8A2
chr6	25608430	25608431	1	-0.27709	CARMIL1
chr5	25609495	25610248	1	-0.17288	NA
chr20	25658236	25658237	1	-0.34375	ZNF337-AS1
chr10	25660239	25660240	1	-0.138324	LINC00836
chr22	25669190	25669191	1	-0.290014	GRK3
chr11	25738185	25738186	1	-0.101771	LINC02699
chr22	25760211	25760212	1	-0.244444	MYO18B
chr2	25790308	25790346	1	-0.143949	ASXL2
chr18	25836869	25836959	1	-0.176871	NA
chr16	25856130	25856131	1	0.405797	AC093516,1
chr16	25856130	25856131	1	0.405797	HS3ST4
chr13	25887091	25887092	1	-0.2	ATP8A2
chr11	25893135	25893136	1	0.313765	NA
chr22	25903729	25903772	1	-0.263923	MYO18B
chr8	26032676	26032677	1	-0.336898	EBF2
chr14	26060416	26060417	1	-0.266667	LINC02306
chr6	26080141	26080142	1	-0.264286	NA
chr13	26091927	26091928	1	-0.150867	NA
chr18	26134121	26134318	1	-0.2056	PSMA8
chr4	26167432	26167433	1	-0.22619	RBPJ
chr14	26242541	26242601	1	-0.176126	NA
chr22	26401187	26401188	1	-0.277778	NA
chr10	26420832	26420833	1	0.221167	NA
chr6	26434268	26434269	1	-0.371429	NA
chr6	26562257	26562258	1	-0.162592	NA
chr2	26577299	26577300	1	-0.291667	FAM166C
chr1	26621970	26621971	1	0.295228	NA
chr6	26623767	26623768	1	0.102133	NA
chr6	26639284	26639285	1	-0.270903	ZNF322
chr11	26669402	26669403	1	-0.129771	SLC5A12
chr22	26719079	26719080	1	-0.314286	MIATNB
chr16	26724140	26724141	1	-0.297619	AC009035,1
chr2	26730001	26730002	1	-0.288793	KCNK3
chr8	26738720	26738747	1	-0.10646	NA
chr13	26837549	26837550	1	-0.318182	NA
chr18	26868901	26868903	1	-0.266234	AQP4-AS1
chr18	26891885	26891886	1	-0.192879	AQP4-AS1
chr8	26892769	26892770	1	-0.234615	NA
chr11	26927106	26927107	1	-0.0845324	NA
chr13	26979510	26979511	1	-0.37037	AL160035,1
chr13	27029710	27029711	1	0.104476	NA
chr22	27038273	27038274	1	-0.336022	NA
chr4	27041821	27041822	1	-0.34375	NA
chr11	27045707	27045708	1	-0.323529	BBOX1
chr14	27066481	27066482	1	0.135982	AL110292,1
chr14	27089046	27089047	1	0.213072	AL110292,1
chr14	27121908	27122023	1	0.160256	AL110292,1
chr22	27143033	27143034	1	-0.288043	NA
chr14	27218740	27218741	1	-0.303828	AL110292,1
chr8	27238831	27238832	1	-0.277778	STMN4
chr18	27262878	27262879	1	-0.132536	NA
chr18	27268044	27268074	1	-0.215317	NA
chr18	27300411	27300412	1	-0.1875	NA
chr11	27315326	27315327	1	0.216312	NA
chr6	27330050	27330051	1	-0.128368	NA
chr16	27388328	27388329	1	0.263636	NA
chr18	27393061	27393062	1	-0.24	AC068408,1
chr18	27393061	27393062	1	-0.24	AC090403,1
chr4	27403721	27403723	1	-0.248214	NA
chr18	27430433	27430434	1	-0.0964649	AC090403,1
chr17	27440479	27440480	1	0.182516	NA
chr8	27514719	27514720	1	-0.392857	EPHX2
chr19	27515679	27515680	1	-0.312937	NA
chr19	27521291	27521292	1	-0.359459	NA
chr5	27573749	27574112	1	0.0941446	NA
chr22	27578365	27578366	1	-0.319805	NA
chr22	27596279	27596280	1	-0.283358	NA
chr11	27597034	27597035	1	-0.25	BDNF-AS
chr8	27632737	27632738	1	-0.284762	NA
chr10	27640233	27640234	1	-0.176092	NA
chr6	27684258	27684448	1	0.188172	NA
chr22	27698645	27699031	1	-0.237373	AL121885,2
chr2	27730084	27730085	1	-0.294444	NA
chr14	27740250	27740311	1	-0.121074	AL390334,1
chr8	27840123	27840124	1	-0.288676	AC104997,1
chr4	27857179	27857180	1	-0.0893919	NA
chr4	27880099	27880100	1	-0.304839	NA
chr13	27898512	27898513	1	-0.111281	PLUT
chr11	27918473	27918474	1	-0.228758	NA
chr14	27974291	27974292	1	-0.168349	NA
chr19	27977433	27977434	1	0.388889	AC005357,2
chr19	27977433	27977434	1	0.388889	AC006504,5
chr17	27978558	27978559	1	-0.270108	LINC01992
chr2	27983402	27983403	1	-0.169011	BABAM2
chr2	27983402	27983403	1	-0.169011	MRPL33
chr16	28049860	28049861	1	-0.25387	GSG1L
chr22	28189967	28189968	1	-0.193452	TTC28
chr22	28252560	28252561	1	-0.272917	TTC28
chr21	28263494	28263760	1	-0.194474	NA
chr8	28314197	28314198	1	-0.255848	AC021678,2
chr8	28352081	28352088	1	-0.28022	FBXO16
chr8	28352081	28352088	1	-0.28022	ZNF395
chr10	28365454	28365455	1	-0.152226	NA
chr4	28383586	28383769	1	-0.188025	AC093791,1
chr18	28400955	28400956	1	-0.285714	NA
chr2	28409276	28409277	1	-0.342857	FOSL2
chr11	28418286	28418287	1	-0.354839	METTL15
chr17	28421424	28421425	1	-0.257559	NA
chr4	28422699	28422700	1	0.188575	NA
chr6	28524440	28524441	1	-0.161348	GPX6
chr17	28540452	28540453	1	-0.291444	AC005726,1
chr13	28549826	28549827	1	-0.277049	NA
chr14	28598300	28598301	1	-0.108235	LINC02300
chr14	28661686	28661687	1	-0.296791	NA
chr11	28767533	28767534	1	-0.241289	LINC02742
chr13	28771621	28771622	1	-0.159622	NA
chr2	28773428	28773429	1	-0.317949	PPP1CB
chr4	28803517	28803518	1	-0.29959	NA
chr22	28808370	28808401	1	-0.220066	Z93930,2
chr6	28866180	28866181	1	-0.363415	NA
chr13	28868841	28868842	1	-0.346154	MTUS2
chr2	28871103	28871104	1	0.344444	NA
chr18	28881871	28882008	1	-0.115261	NA
chr18	28902014	28902015	1	-0.109016	NA
chr4	28914985	28915124	1	-0.108399	NA
chr13	28925305	28925307	1	-0.19883	MTUS2
chr13	28967677	28967678	1	-0.290516	MTUS2
chr22	28976472	28976473	1	-0.312821	ZNRF3
chr19	28989947	28989948	1	0.37296	NA
chr18	29029597	29029598	1	-0.128913	NA
chr18	29064105	29064106	1	-0.112864	NA
chr6	29075217	29075219	1	-0.217611	AL662791,2
chr13	29081740	29081741	1	-0.333977	MTUS2
chr10	29291783	29291784	1	-0.308756	LYZL1
chr19	29303209	29303297	1	-0.179643	AC011474,1
chr10	29348922	29348923	1	-0.265182	NA
chr11	29406792	29406793	1	-0.257053	LINC02755
chr12	29432999	29433000	1	-0.171371	OVCH1
chr12	29432999	29433000	1	-0.171371	OVCH1-AS1
chr10	29483957	29483958	1	-0.382979	SVIL
chr10	29483957	29483958	1	-0.382979	SVIL-AS1
chr8	29523764	29523768	1	-0.147284	NA
chr19	29578994	29578995	1	-0.275862	NA
chr18	29593413	29593414	1	0.127934	NA
chr2	29617714	29617715	1	-0.262353	ALK
chr4	29667539	29667540	1	-0.40625	NA
chr22	29694847	29694848	1	-0.371429	NF2
chr18	29734769	29734770	1	-0.239912	NA
chr16	29741956	29741957	1	0.294118	NA
chr11	29837207	29837208	1	-0.316667	AC107973,1
chr11	29837207	29837208	1	-0.316667	LINC02755
chr16	29851184	29851185	1	-0.272543	NA
chr6	29857331	29857686	2	-0.147677	AL645929,3
chr2	29870371	29870372	1	-0.208405	AC106870,3
chr2	29870371	29870372	1	-0.208405	ALK
chr13	29887343	29887587	2	-0.123333	LINC00297
chr11	29896674	29896675	1	-0.282609	LINC02755
chr2	29921341	29921362	1	0.217172	AC106870,3
chr2	29921341	29921362	1	0.217172	ALK
chr10	29923219	29923220	1	-0.27971	NA
chr17	29953418	29953419	1	-0.261905	EFCAB5
chr6	29971766	29971771	1	-0.277473	MICD
chr2	29974019	29974020	1	-0.307432	NA
chr6	29995365	29995366	1	-0.349265	NA
chr6	30047505	30047506	1	-0.352535	ZNRD1ASP
chr10	30049143	30049144	1	0.344444	JCAD
chr22	30062424	30062425	1	0.212329	HORMAD2-AS1
chr14	30110218	30110219	1	0.19186	AL133372,2
chr14	30110218	30110219	1	0.19186	PRKD1
chr11	30174892	30174893	1	-0.268421	AL358944,1
chr2	30229890	30229891	1	-0.328431	NA
chr18	30235648	30235649	1	-0.333333	NA
chr6	30244027	30244028	1	0.103488	HCG17
chr11	30285651	30285652	1	-0.383333	AL358944,1
chr11	30314178	30314179	1	-0.275484	AL358944,1
chr13	30344994	30344995	1	-0.290043	AL356750,1
chr13	30344994	30344995	1	-0.290043	LINC00426
chr11	30417404	30417405	1	-0.295238	MPPED2
chr2	30444380	30444381	1	0.303846	NA
chr14	30447054	30447055	1	-0.279605	G2E3-AS1
chr19	30452421	30452422	1	-0.328947	ZNF536
chr4	30470778	30470779	1	-0.107554	NA
chr11	30519078	30519079	1	-0.286713	MPPED2
chr6	30533611	30533767	2	-0.167337	NA
chr19	30552862	30552863	1	-0.434921	ZNF536
chr18	30568928	30568929	1	-0.35	NA
chr2	30577870	30577871	1	-0.132882	LCLAT1
chr13	30657377	30657378	1	0.328205	USPL1
chr14	30685889	30685890	1	-0.266667	SCFD1
chr6	30805864	30805865	1	-0.232143	LINC00243
chr10	30812801	30812802	1	0.258915	NA
chr4	30862181	30862182	1	-0.267105	PCDH7
chr4	30958304	30958317	1	-0.145665	PCDH7
chr6	31001227	31001228	1	0.418605	NA
chr6	31101188	31101189	1	0.128761	NA
chr4	31124908	31124909	1	-0.268939	PCDH7
chr8	31193792	31193793	1	-0.119445	NA
chr4	31234747	31234748	1	-0.278632	NA
chr8	31286256	31286257	1	0.318182	AC068672,2
chr11	31302218	31302219	1	-0.228387	DCDC1
chr11	31307983	31307984	1	-0.208978	AL137804,1
chr11	31307983	31307984	1	-0.208978	DCDC1
chr8	31319775	31319776	1	-0.21931	AC068672,2
chr21	31322413	31322778	1	-0.108696	TIAM1
chr16	31329046	31329047	1	-0.309091	ITGAM
chr11	31348250	31348251	1	-0.178772	DCDC1
chr8	31411424	31411426	1	-0.0811632	NA
chr19	31433116	31433117	1	-0.248564	NA
chr13	31441285	31441286	1	-0.34413	NA
chr13	31460803	31460994	1	-0.167685	NA
chr18	31473725	31473789	1	-0.149447	DSG3
chr16	31502580	31502581	1	-0.32	C16orf58
chr14	31530280	31530431	1	-0.153384	NUBPL
chr19	31560354	31560355	1	-0.358974	NA
chr2	31574166	31574167	1	-0.334967	SRD5A2
chr16	31583071	31583072	1	-0.195726	NA
chr8	31586857	31586858	1	0.113335	NA
chr2	31607344	31607345	1	-0.0874621	NA
chr17	31612356	31612357	1	0.219903	AC007923,4
chr16	31696782	31696783	1	-0.303605	NA
chr18	31754755	31754756	1	-0.165169	NA
chr22	31835696	31835848	1	-0.214895	DEPDC5
chr22	31835696	31835848	1	-0.214895	Z82190,2
chr14	31883349	31883351	1	-0.148148	NA
chr18	31966244	31966245	1	-0.338235	NA
chr19	31970023	31970024	1	-0.28046	LINC01837
chr22	31994321	31994322	1	-0.265182	LINC02558
chr14	32049991	32050003	1	0.217143	NA
chr18	32151118	32151119	1	-0.113412	GAREM1
chr22	32190031	32190032	1	-0.334842	NA
chr4	32210299	32210300	1	-0.285088	LINC02506
chr8	32234545	32234546	1	-0.267637	NRG1
chr17	32308550	32308551	1	-0.284314	RHBDL3
chr22	32324956	32324957	1	-0.299242	NA
chr11	32347699	32347700	1	-0.226939	NA
chr14	32360622	32360623	1	-0.192526	AKAP6
chr16	32396737	32396738	1	0.115697	AC138915,2
chr18	32407876	32407877	1	-0.231267	GAREM1
chr11	32435235	32435247	2	0.310811	WT1
chr4	32489214	32489215	1	-0.0820879	NA
chr8	32492053	32492054	1	-0.283333	NRG1
chr11	32503427	32503428	1	-0.140466	NA
chr17	32550641	32550642	1	-0.256739	MYO1D
chr8	32563564	32563565	1	-0.283529	NRG1
chr17	32564672	32564673	1	-0.296188	MYO1D
chr8	32613170	32613171	1	-0.251915	NRG1
chr22	32621847	32621848	1	-0.351351	SYN3
chr14	32628642	32628643	1	-0.15766	AKAP6
chr18	32655568	32655569	1	-0.275758	AC025887,2
chr10	32669646	32669647	1	-0.0950457	CCDC7
chr14	32810398	32810399	1	-0.310345	AKAP6
chr18	32950534	32950541	1	-0.188492	CCDC178
chr2	32987451	32987452	1	-0.26533	LTBP1
chr8	33021619	33021620	1	-0.277059	AC090204,1
chr17	33036950	33036951	1	-0.226087	ASIC2
chr16	33065251	33065252	1	-0.0833284	AC145350,2
chr1	33086706	33087196	1	-0.131211	AZIN2
chr4	33087394	33087395	1	-0.115954	NA
chr14	33088822	33088823	1	-0.266667	NPAS3
chr20	33097042	33099505	1	-0.164548	BPIFB4
chr10	33112148	33112149	1	-0.235294	IATPR
chr17	33183172	33183173	1	-0.258462	ASIC2
chr17	33191299	33191301	1	-0.128805	ASIC2
chr8	33223572	33223573	1	-0.240721	NA
chr4	33238631	33238632	1	-0.335913	AC093878,1
chr22	33247853	33247854	1	-0.301176	LARGE1
chr14	33272778	33272779	1	-0.243939	NPAS3
chr17	33333310	33333311	1	-0.232432	ASIC2
chr19	33391692	33391693	1	-0.31681	PEPD
chr19	33409144	33409228	1	-0.253197	PEPD
chr18	33437013	33437163	1	-0.190275	CCDC178
chr19	33471073	33471074	1	0.378378	PEPD
chr4	33473229	33473230	1	-0.388889	AC079772,1
chr4	33498299	33498300	1	-0.215934	AC079772,1
chr10	33499120	33499280	1	-0.148592	NA
chr11	33504521	33504522	1	-0.205243	KIAA1549L
chr22	33505677	33505678	1	-0.387097	LARGE1
chr4	33508082	33508083	1	-0.4	AC079772,1
chr5	33542963	33543158	1	-0.0877867	ADAMTS12
chr11	33572983	33572984	1	-0.176158	KIAA1549L
chr11	33608043	33608044	1	-0.280051	KIAA1549L
chr22	33654692	33654693	1	-0.321389	LARGE1
chr13	33696197	33696199	1	-0.20154	NA
chr2	33698359	33698360	1	0.363158	NA
chr17	33742437	33742438	1	-0.322917	ASIC2
chr2	33745835	33745864	1	0.233929	LINC01320
chr2	33752453	33752454	1	0.105551	LINC01320
chr13	33766049	33766050	1	-0.124763	NA
chr22	33788577	33788578	1	-0.218599	LARGE1
chr6	33789513	33789529	1	-0.219048	NA
chr4	33790394	33790395	1	-0.387755	AC016687,3
chr22	33813080	33813154	1	-0.102381	LARGE1
chr16	33825613	33825766	2	-0.130952	NA
chr16	33847120	33847121	1	-0.260317	NA
chr10	33855908	33855909	1	-0.107207	NA
chr16	33886211	33886212	1	0.522989	NA
chr18	33938144	33938145	1	-0.228682	NOL4
chr18	33995180	33995182	1	-0.0818407	NOL4
chr17	33996364	33996365	1	-0.103738	AC004147,4
chr17	33996364	33996365	1	-0.103738	AC024610,2
chr17	33996364	33996365	1	-0.103738	ASIC2
chr2	34024693	34024694	1	-0.250774	LINC01320
chr17	34081430	34081431	1	-0.244444	AC004147,1
chr17	34081430	34081431	1	-0.244444	AC004147,4
chr17	34081430	34081431	1	-0.244444	ASIC2
chr2	34085950	34085951	1	0.216524	LINC01320
chr6	34091799	34091800	1	-0.413793	GRM4
chr8	34098330	34098331	1	-0.222222	NA
chr22	34128622	34128623	1	-0.363889	LINC01643
chr13	34216287	34216288	1	-0.338828	NA
chr2	34301614	34301615	1	-0.294118	LINC01320
chr17	34340074	34340075	1	-0.277778	NA
chr12	34386310	34386948	1	-0.179438	NA
chr13	34387019	34387020	1	-0.344828	LINC02343
chr2	34410585	34410586	1	0.136923	LINC01320
chr18	34412636	34412637	1	-0.223721	NA
chr22	34415796	34415798	1	-0.226091	NA
chr13	34422392	34422439	1	-0.157525	LINC02343
chr13	34443508	34443510	1	-0.161143	LINC00457
chr13	34443508	34443510	1	-0.161143	LINC02343
chr21	34457381	34457408	1	-0.115426	KCNE1
chr2	34459613	34459614	1	-0.272825	LINC01320
chr5	34459744	34460106	1	0.142605	NA
chr10	34466370	34466371	1	-0.36	PARD3
chr10	34477090	34477091	1	-0.368421	PARD3
chr17	34537907	34537908	1	-0.234848	NA
chr19	34654903	34654904	1	-0.221429	SCGB2B2
chr18	34699604	34699649	1	-0.131137	DTNA
chr22	34700588	34700589	1	-0.346154	NA
chr13	34721397	34721398	1	-0.340223	NA
chr6	34744009	34744010	1	0.209462	NA
chr11	34754624	34754625	1	0.25	NA
chr18	34774384	34774385	1	0.262626	DTNA
chr17	34789637	34789638	1	-0.259863	NA
chr10	34795320	34795321	1	-0.290476	PARD3
chr17	34807233	34807234	1	-0.346154	NA
chr19	34854111	34854112	1	-0.291667	AC008555,2
chr19	34854111	34854112	1	-0.291667	AC008555,4
chr6	34981941	34981942	1	-0.287037	ANKS1A
chr17	35016771	35016772	1	-0.320922	AC004223,3
chr17	35016771	35016772	1	-0.320922	RFFL
chr6	35048079	35048080	1	0.377005	AL591002,1
chr6	35048079	35048080	1	0.377005	ANKS1A
chr20	35070472	35070505	1	-0.164708	TRPC4AP
chr19	35142257	35142258	1	0.296296	AC020907,2
chr19	35142257	35142258	1	0.296296	FXYD1
chr19	35142257	35142258	1	0.296296	LGI4
chr4	35164687	35164785	1	-0.134821	NA
chr22	35187913	35187914	1	-0.115018	LINC01399
chr2	35234060	35234061	1	-0.222069	NA
chr6	35263769	35263770	1	-0.251282	ZNF76
chr2	35271731	35271732	1	-0.271527	AC013442,2
chr2	35298335	35298336	1	-0.242978	NA
chr14	35332597	35332598	1	0.254274	NA
chr13	35339684	35339685	1	-0.172161	NBEA
chr8	35382491	35382492	1	-0.299679	UNC5D
chr18	35494538	35494539	1	0.32	AC007998,2
chr18	35494538	35494539	1	0.32	INO80C
chr18	35506455	35506456	1	-0.272358	NA
chr4	35558123	35558124	1	0.130592	NA
chr21	35621636	35621694	1	-0.185771	RUNX1
chr11	35628526	35628527	1	0.162476	NA
chr17	35635147	35635148	1	-0.307494	AP2B1
chr11	35649944	35649945	1	0.222642	NA
chr8	35690261	35690262	1	-0.25	AC105230,1
chr8	35690261	35690262	1	-0.25	UNC5D
chr19	35756284	35756456	1	0.189062	HSPB6
chr6	35774530	35774531	1	-0.34058	NA
chr18	35806656	35806657	1	-0.288095	NA
chr8	35857707	35857749	1	-0.19943	NA
chr19	35874051	35874163	1	-0.238497	APLP1
chr13	35986657	35986666	1	-0.142857	DCLK1
chr8	36012023	36012024	1	-0.257576	AC124290,1
chr8	36012023	36012024	1	-0.257576	AC124290,2
chr6	36012177	36012178	1	-0.294643	SLC26A8
chr10	36070405	36070406	1	-0.31954	NA
chr14	36072997	36072998	1	-0.351613	LINC00609
chr13	36179010	36179011	1	-0.08915	CCDC169-SOHLH2
chr13	36179010	36179011	1	-0.08915	SOHLH2
chr8	36194436	36194437	1	-0.262153	NA
chr6	36245974	36245975	1	-0.413793	PNPLA1
chr8	36296725	36296726	1	-0.300813	NA
chr13	36299454	36299455	1	-0.270903	NA
chr4	36305535	36305536	1	-0.351351	DTHD1
chr4	36325458	36325459	1	-0.187267	AC104078,2
chr4	36325458	36325459	1	-0.187267	DTHD1
chr6	36325790	36325791	1	-0.333333	BNIP5
chr2	36382085	36382086	1	-0.315018	CRIM1
chr14	36429364	36429365	1	-0.128388	AL132857,2
chr8	36546108	36546109	1	-0.263252	AC090809,1
chr5	36557721	36558151	1	0.0947494	NA
chr13	36558415	36558416	1	-0.229567	NA
chr14	36589459	36589460	1	0.297297	AL132857,2
chr22	36591181	36591198	2	-0.292642	CACNG2
chr8	36619733	36619734	1	-0.305613	AC090809,1
chr2	36640225	36640226	1	-0.136553	FEZ2
chr18	36667224	36667225	1	-0.270833	FHOD3
chr22	36691806	36691934	1	-0.16975	CACNG2
chr4	36801700	36801701	1	-0.0808353	NA
chr10	36868632	36868633	1	-0.290043	NA
chr8	36887267	36887269	1	-0.13787	KCNU1
chr22	36896040	36896042	1	-0.196429	NA
chr19	36906399	36906400	1	-0.132576	ZNF345
chr19	36906399	36906400	1	-0.132576	ZNF829
chr13	36914728	36914729	1	-0.263077	SMAD9
chr4	36955483	36955484	1	-0.137363	NA
chr10	36964756	36964757	1	-0.307988	NA
chr10	36978650	36978651	1	-0.190051	NA
chr10	36980371	36980717	1	-0.151786	NA
chr10	37017060	37017061	1	-0.206531	NA
chr14	37063935	37063936	1	-0.368421	SLC25A21
chr10	37076027	37076030	2	-0.382353	NA
chr13	37080353	37080354	1	-0.411765	NA
chr8	37116269	37116270	1	0.118012	NA
chr8	37138683	37138684	1	-0.254743	NA
chr19	37154555	37154556	1	-0.0873494	AC012309,1
chr19	37154555	37154556	1	-0.0873494	ZNF585A
chr4	37192252	37192253	1	-0.189224	NA
chr10	37203533	37203535	1	-0.223927	ANKRD30A
chr10	37219859	37219860	1	-0.0927166	ANKRD30A
chr8	37259929	37260078	1	-0.222644	NA
chr18	37336932	37337034	1	-0.0850722	CELF4
chr18	37405444	37405445	1	0.25	CELF4
chr2	37411491	37411492	1	-0.252525	NA
chr18	37421960	37421961	1	-0.354839	CELF4
chr14	37430630	37430631	1	-0.210339	MIPOL1
chr20	37495551	37496762	1	-0.086896	BLCAP
chr22	37521512	37521513	1	-0.336257	NA
chr18	37567857	37567864	1	0.299889	AC009899,1
chr2	37625795	37625796	1	-0.322072	AC006369,1
chr18	37659522	37659523	1	-0.231818	AC009899,1
chr14	37723023	37723024	1	-0.183515	TTC6
chr14	37749342	37749343	1	-0.188779	TTC6
chr4	37766956	37766957	1	-0.328682	NA
chr4	37775260	37775261	1	-0.321429	NA
chr11	37786741	37786742	1	-0.267057	NA
chr11	37791049	37791050	1	-0.135974	NA
chr11	37796824	37796825	1	-0.328932	NA
chr14	37800694	37800695	1	-0.27619	TTC6
chr17	37831860	37831861	1	-0.314286	YWHAEP7
chr17	37897751	37897752	1	-0.25	NA
chr18	37948120	37948121	1	-0.230885	NA
chr19	37974286	37974287	1	-0.363636	SIPA1L3
chr11	38019758	38019759	1	-0.26	NA
chr14	38053332	38053333	1	-0.287719	AL392023,2
chr21	38063512	38063794	1	-0.146045	DSCR4
chr21	38063512	38063794	1	-0.146045	KCNJ6
chr18	38134134	38134135	1	-0.240891	NA
chr22	38289814	38290004	1	-0.150152	NA
chr10	38328282	38328324	1	-0.270833	AL117339,5
chr10	38328282	38328324	1	-0.270833	AL133217,1
chr2	38417587	38417588	1	-0.37931	LINC02613
chr14	38436547	38436548	1	-0.282353	NA
chr18	38439919	38439920	1	-0.217049	NA
chr8	38459110	38459111	1	-0.307692	FGFR1
chr17	38459821	38459822	1	-0.361472	ARHGAP23
chr2	38463688	38463689	1	-0.342301	LINC02613
chr14	38516349	38516350	1	-0.238961	NA
chr14	38550862	38550864	1	-0.196409	NA
chr14	38599701	38599702	1	-0.181406	NA
chr14	38681918	38681919	1	-0.133973	NA
chr5	38690184	38690745	1	-0.140728	OSMR-AS1
chr11	38774508	38774509	1	-0.268717	NA
chr21	38801598	38802367	1	-0.17165	NA
chr20	38840869	38841810	1	-0.136296	PPP1R16B
chr11	38931013	38931014	1	-0.185435	NA
chr17	38952946	38952947	1	-0.344444	FBXO47
chr2	38970932	38970933	1	-0.290244	ARHGEF33
chr22	39101408	39101409	1	-0.378378	APOBEC3H
chr14	39102210	39102408	2	-0.174801	SEC23A
chr18	39137749	39137750	1	-0.334842	NA
chr18	39140882	39140883	1	-0.313059	NA
chr18	39146546	39146547	1	-0.244498	NA
chr18	39159047	39159074	1	-0.202381	NA
chr11	39161757	39161786	3	-0.288324	AC021723,1
chr13	39225911	39225912	1	-0.272072	LHFPL6
chr6	39228759	39228760	1	-0.417614	KCNK5
chr17	39238682	39238701	2	0.30303	AC015910,1
chr11	39316543	39316544	1	-0.28145	NA
chr6	39371149	39371150	1	0.315412	KIF6
chr14	39383990	39383991	1	-0.216312	MIA2
chr13	39436571	39436572	1	-0.228372	LHFPL6
chr22	39491142	39491143	1	-0.222222	MGAT3
chr14	39525129	39525130	1	-0.282828	AL049828,1
chr5	39530333	39531155	1	-0.151371	NA
chr2	39539144	39539145	1	-0.421911	MAP4K3-DT
chr22	39596767	39596768	1	-0.286364	CACNA1I
chr22	39605811	39605812	1	-0.302326	CACNA1I
chr14	39757079	39757140	1	-0.110299	AL049828,1
chr6	39855059	39855060	1	-0.4	DAAM2
chr17	39860479	39860645	2	-0.18271	IKZF3
chr19	39949011	39949012	1	-0.282407	NA
chr13	40048255	40048256	1	-0.265766	NA
chr17	40084226	40084227	1	-0.416667	THRA
chr2	40148361	40148514	1	-0.131024	SLC8A1
chr2	40148361	40148514	1	-0.131024	SLC8A1-AS1
chr17	40176806	40176807	1	-0.240244	NA
chr8	40177722	40177723	1	-0.240625	NA
chr8	40236833	40236834	1	0.149752	NA
chr2	40350975	40350976	1	0.203947	SLC8A1
chr11	40364268	40364269	1	-0.083244	LRRC4C
chr11	40372555	40372558	2	-0.405172	LRRC4C
chr18	40445440	40445441	1	-0.13658	NA
chr4	40502514	40502536	1	-0.24508	RBM47
chr14	40505438	40505439	1	-0.306561	NA
chr18	40537045	40537046	1	-0.288014	NA
chr14	40566010	40566011	1	-0.303136	NA
chr8	40585045	40585046	1	-0.307018	ZMAT4
chr19	40609452	40609453	1	0.342857	LTBP4
chr17	40648906	40648907	1	-0.342857	AC073508,2
chr17	40648906	40648907	1	-0.342857	AC073508,3
chr2	40675388	40675389	1	-0.290476	AC007317,1
chr19	40691832	40691833	1	-0.354545	COQ8B
chr19	40697668	40697669	1	-0.237755	COQ8B
chr17	40759628	40759629	1	-0.107256	NA
chr6	40766591	40766592	1	0.197084	NA
chr11	40845989	40845990	1	-0.203724	LRRC4C
chr13	40870115	40870116	1	0.404762	TPTE2P5
chr6	40889263	40889264	1	-0.294737	NA
chr6	40889759	40889760	1	-0.316176	NA
chr14	40904337	40904338	1	-0.187578	AL390800,1
chr17	40949085	40949121	1	-0.163116	AC004231,1
chr14	41016182	41016184	1	-0.223721	LINC02315
chr14	41025535	41025536	1	-0.190235	LINC02315
chr17	41086500	41086501	1	-0.245833	NA
chr17	41088812	41088813	1	-0.343629	NA
chr6	41100717	41100718	1	-0.252525	AL031778,1
chr21	41145626	41145817	1	0.113673	LINC00323
chr2	41149270	41149271	1	-0.135934	HNRNPA1P57
chr19	41170847	41170849	1	-0.221575	NA
chr11	41191676	41191677	1	-0.244306	LRRC4C
chr8	41383081	41383096	1	-0.254032	NA
chr12	41431532	41432175	1	-0.139501	AC090531,1
chr12	41431532	41432175	1	-0.139501	PDZRN4
chr14	41472407	41472408	1	-0.0836386	NA
chr6	41495547	41495548	1	-0.414286	FOXP4-AS1
chr19	41539554	41539555	1	-0.373737	NA
chr17	41552106	41552107	1	-0.309524	LINC00974
chr13	41595943	41595944	1	0.236364	VWA8
chr11	41617495	41617496	1	-0.296053	LINC02741
chr17	41631457	41631458	1	-0.424242	KRT42P
chr18	41642512	41642514	1	-0.115409	NA
chr14	41722002	41722003	1	-0.104535	LRFN5
chr6	41785031	41785032	1	-0.384615	AL365205,1
chr6	41785031	41785032	1	-0.384615	FRS3
chr6	41785031	41785032	1	-0.384615	PRICKLE4
chr4	41832376	41832377	1	-0.272222	NA
chr18	41900173	41900174	1	-0.272599	NA
chr4	41902176	41902177	1	-0.144485	AC108210,1
chr22	41934079	41934090	2	0.309091	NA
chr11	41987402	41987515	1	-0.175872	NA
chr11	42071591	42071592	1	-0.258838	LINC02745
chr14	42265236	42265237	1	0.116325	AL445074,1
chr17	42271256	42271257	1	-0.25	AC099811,1
chr17	42271256	42271257	1	-0.25	STAT5B
chr5	42275077	42275078	1	-0.27451	NA
chr12	42286637	42287413	1	-0.136432	AC020629,1
chr12	42286637	42287413	1	-0.136432	PPHLN1
chr17	42315714	42315764	2	0.260315	STAT3
chr22	42368236	42368237	1	0.238095	LINC01315
chr6	42368710	42368711	1	-0.282828	TRERF1
chr18	42373312	42373313	1	-0.340426	LINC00907
chr21	42403972	42405250	1	0.18254	UBASH3A
chr14	42422911	42422912	1	-0.0980242	AL442163,1
chr14	42422911	42422912	1	-0.0980242	AL450442,1
chr11	42471864	42471865	1	0.302676	NA
chr10	42526875	42526876	1	0.21271	ZNF37BP
chr11	42603436	42603437	1	-0.212733	NA
chr2	42667695	42667696	1	-0.316667	MTA3
chr10	42687338	42687339	1	-0.265625	LINC01518
chr13	42699989	42700072	1	-0.121095	NA
chr11	42726865	42726866	1	-0.28	NA
chr13	42765293	42765294	1	-0.361702	NA
chr10	42765328	42765329	1	-0.306799	NA
chr5	42766301	42766302	1	0.209091	CCDC152
chr13	42808861	42808862	1	-0.419048	NA
chr8	42813529	42813530	1	-0.378378	NA
chr14	42854145	42854146	1	-0.27318	NA
chr10	42864049	42864050	1	-0.22929	NA
chr22	42882193	42882194	1	-0.388889	PACSIN2
chr17	42884370	42884371	1	-0.326613	LINC00671
chr19	42994959	42995016	1	-0.203401	AC004784,1
chr13	43004085	43004116	1	-0.267857	NA
chr10	43019944	43019945	1	-0.152661	NA
chr13	43172057	43172058	1	-0.361111	NA
chr13	43190925	43190926	1	-0.253333	NA
chr5	43203854	43203855	1	-0.315789	NIM1K
chr2	43209449	43209450	1	-0.388514	NA
chr5	43364969	43365067	1	-0.169706	NA
chr17	43367155	43367179	1	0.32043	LINC00910
chr4	43378421	43378422	1	-0.301291	NA
chr20	43394937	43395045	1	-0.210813	NA
chr22	43449631	43449632	1	-0.30303	MPPED1
chr17	43455789	43455790	1	-0.318426	NA
chr22	43471721	43471722	1	-0.372222	MPPED1
chr22	43474697	43474698	1	0.290323	MPPED1
chr13	43503737	43503738	1	-0.138722	ENOX1
chr14	43518717	43518718	1	-0.138703	NA
chr19	43534386	43534394	1	0.302985	ZNF575
chr22	43534573	43534574	1	-0.298246	EFCAB6
chr22	43534573	43534574	1	-0.298246	EFCAB6-AS1
chr10	43542347	43542348	1	-0.278226	NA
chr4	43565061	43565062	1	-0.216504	NA
chr22	43635945	43635946	1	-0.300699	EFCAB6
chr17	43649694	43649695	1	-0.283333	MEOX1
chr10	43670119	43670183	1	-0.222777	ZNF32-AS3
chr19	43692212	43692213	1	-0.313929	AC005622,1
chr13	43697604	43697771	1	-0.25035	ENOX1
chr18	43698716	43698747	1	-0.2	NA
chr2	43710060	43710061	1	-0.252033	PLEKHH2
chr18	43779228	43779229	1	-0.144526	NA
chr19	43793473	43793474	1	-0.269795	LYPD5
chr17	43815719	43815720	1	-0.270677	MPP3
chr8	43825954	43825955	1	-0.228992	NA
chr19	43861248	43861249	1	-0.139788	NA
chr4	43869251	43869252	1	-0.224224	AC080132,1
chr11	43878551	43878552	1	-0.375	AC087521,2
chr4	43915400	43915561	1	-0.0968992	AC080132,1
chr11	43986490	43986491	1	-0.278897	AC087521,3
chr19	44041017	44041018	1	-0.235931	AC067968,1
chr10	44044132	44044133	1	-0.285088	NA
chr14	44113641	44113642	1	-0.25614	LINC02307
chr4	44133987	44133988	1	-0.19582	NA
chr13	44136132	44136133	1	-0.311712	LINC00390
chr13	44136132	44136133	1	-0.311712	SMIM2-AS1
chr21	44202070	44205130	1	-0.151911	AP001057,1
chr21	44202070	44205130	1	-0.151911	GATD3A
chr2	44239409	44239410	1	-0.155004	AC013717,1
chr2	44239409	44239410	1	-0.155004	PPM1B
chr2	44317815	44317816	1	-0.136242	AC013717,1
chr2	44317815	44317816	1	-0.136242	PREPL
chr2	44317815	44317816	1	-0.136242	SLC3A1
chr10	44344585	44344586	1	-0.241658	NA
chr17	44354770	44354781	1	0.304276	FAM171A2
chr13	44365983	44365984	1	-0.384615	NA
chr5	44409863	44409864	1	-0.211944	FGF10-AS1
chr22	44435174	44435175	1	-0.20625	NA
chr10	44488827	44488828	1	-0.287634	NA
chr4	44492836	44492837	1	-0.25	NA
chr6	44506825	44506826	1	-0.201049	NA
chr10	44546963	44546964	1	-0.0932333	NA
chr11	44549436	44549437	1	-0.252896	NA
chr5	44573370	44573371	1	-0.218703	LINC02224
chr5	44662858	44662859	1	-0.11189	NA
chr5	44697926	44697933	1	-0.142174	NA
chr18	44723584	44723585	1	-0.293605	SETBP1
chr13	44729643	44729644	1	-0.368421	NA
chr10	44789552	44789601	1	-0.161576	NA
chr14	44830660	44830661	1	-0.323708	NA
chr10	44892238	44892328	1	-0.272222	TMEM72-AS1
chr4	44953887	44953888	1	-0.250712	NA
chr4	44996399	44996400	1	-0.242424	NA
chr21	45023970	45023971	1	-0.133102	NA
chr17	45047300	45047301	1	-0.316667	DCAKD
chr4	45122593	45122594	1	-0.2875	NA
chr10	45143856	45143857	1	-0.198464	AL358394,3
chr10	45143856	45143857	1	-0.198464	CUBNP3
chr10	45143856	45143857	1	-0.198464	RSU1P2
chr2	45149273	45149347	1	-0.217391	NA
chr2	45166806	45166807	1	-0.354005	LINC01121
chr6	45212724	45212725	1	-0.226374	SUPT3H
chr18	45252657	45252658	1	-0.253742	SLC14A2
chr11	45267163	45267164	1	-0.333333	SYT13
chr6	45310278	45310279	1	-0.363636	SUPT3H
chr14	45463487	45463488	1	-0.350649	NA
chr18	45474978	45475129	1	-0.0976678	SLC14A2
chr18	45474978	45475129	1	-0.0976678	SLC14A2-AS1
chr6	45519747	45519748	1	-0.361702	RUNX2
chr19	45544278	45544299	1	0.222142	OPA3
chr6	45593135	45593136	1	-0.295455	RUNX2
chr11	45616866	45616867	1	-0.285714	NA
chr6	45652181	45652182	1	-0.291667	RUNX2
chr20	45690154	45690155	1	-0.235043	WFDC10B
chr11	45720651	45720652	1	-0.262016	NA
chr5	45737795	45737796	1	-0.30084	NA
chr6	45743254	45743273	1	0.299844	NA
chr10	45794911	45794912	1	0.136374	NA
chr2	45840208	45840209	1	0.452381	PRKCE
chr14	45907869	45907870	1	-0.254545	LINC00871
chr22	45926798	45926799	1	-0.411765	WNT7B
chr19	45953223	45953224	1	0.344828	NOVA2
chr5	45954526	45954527	1	0.454545	NA
chr6	45989204	45989205	1	0.346847	CLIC5
chr5	46009907	46009908	1	0.312709	NA
chr5	46059031	46059032	1	-0.219569	NA
chr13	46076519	46076559	2	-0.0946376	CPB2
chr13	46076519	46076559	2	-0.0946376	CPB2-AS1
chr4	46103125	46103126	1	-0.251391	GABRG1
chr2	46105126	46105127	1	0.15	PRKCE
chr19	46123172	46123173	1	-0.325	AC007785,1
chr19	46123172	46123173	1	-0.325	IGFL3
chr14	46135093	46135094	1	-0.372093	LINC00871
chr19	46198740	46198741	1	0.513889	IGFL2-AS1
chr2	46212428	46212429	1	-0.155344	NA
chr19	46228964	46228965	1	-0.288961	AC006262,3
chr6	46280411	46280412	1	-0.277083	RCAN2
chr4	46317973	46317974	1	-0.145482	GABRA2
chr11	46375607	46375608	1	-0.363636	DGKZ
chr13	46504097	46504098	1	-0.258824	LINC01198
chr19	46584158	46584159	1	-0.0834602	AC093503,1
chr19	46584158	46584159	1	-0.0834602	PPP5D1
chr2	46723631	46723632	1	-0.193841	LINC01118
chr2	46723631	46723632	1	-0.193841	SOCS5
chr17	46741380	46741382	1	-0.122555	NSF
chr13	46831246	46831247	1	-0.336134	NA
chr19	46853151	46853152	1	-0.255952	NA
chr8	46856950	46856951	1	-0.378378	LINC00293
chr11	46865358	46865382	1	-0.166901	LRP4
chr11	46865358	46865382	1	-0.166901	LRP4-AS1
chr4	46942943	46942944	1	-0.181931	GABRA4
chr22	46969696	46969697	1	-0.354839	TBC1D22A
chr8	47027339	47027340	1	0.152657	NA
chr14	47071123	47071124	1	-0.283871	MDGA2
chr2	47096028	47096029	1	-0.353153	AC073283,3
chr2	47096028	47096029	1	-0.353153	STPG4
chr6	47133158	47133159	1	-0.25	NA
chr22	47200261	47200262	1	-0.305556	NA
chr13	47216310	47216311	1	-0.298319	NA
chr6	47284319	47284320	1	-0.316092	TNFRSF21
chr2	47343985	47343986	1	-0.375	EPCAM-DT
chr13	47369693	47369694	1	0.0869798	NA
chr19	47370372	47370373	1	-0.47479	DHX34
chr6	47374139	47374141	1	-0.145852	NA
chr13	47385498	47385499	1	-0.37931	NA
chr4	47431668	47431669	1	-0.263492	NA
chr17	47498802	47498803	1	-0.310458	NA
chr22	47609290	47609297	1	-0.251584	NA
chr14	47627309	47627310	1	0.403846	MDGA2
chr14	47669632	47669633	1	-0.237433	MDGA2
chr22	47696504	47696505	1	-0.220779	AL117329,1
chr22	47701178	47701179	1	-0.19933	AL117329,1
chr22	47702739	47702740	1	-0.120561	AL117329,1
chr16	47726738	47726739	1	-0.272072	LINC02133
chr2	47752726	47753095	1	-0.0992295	MSH6
chr8	47756657	47756659	1	0.0860964	NA
chr13	47761031	47761032	1	-0.261364	SUCLA2
chr6	47767420	47767421	1	0.108625	NA
chr19	47865292	47865293	1	-0.327504	LINC01595
chr4	47922651	47922652	1	-0.474747	NIPAL1
chr2	47932161	47932193	1	-0.218641	AC092650,1
chr6	48000916	48000917	1	-0.240844	PTCHD4
chr6	48024392	48024393	1	-0.228571	PTCHD4
chr16	48052025	48052026	1	-0.277778	AC096996,3
chr2	48080561	48080562	1	-0.38	AC092650,1
chr22	48090263	48090354	2	0.214021	NA
chr16	48195408	48195423	1	-0.303719	ABCC11
chr3	48215868	48215869	1	-0.288889	NA
chr8	48253470	48253471	1	-0.300395	NA
chr22	48271495	48271496	1	-0.260131	NA
chr8	48325325	48325326	1	-0.227273	NA
chr20	48363762	48364752	1	-0.100893	AL121888,1
chr20	48363762	48364752	1	-0.100893	LINC00494
chr8	48398110	48398111	1	0.463415	NA
chr22	48423099	48423100	1	-0.304511	NA
chr16	48478228	48478241	1	-0.199241	NA
chr19	48570551	48570552	1	-0.288889	AC008403,3
chr19	48570551	48570552	1	-0.288889	SULT2B1
chr17	48582415	48582438	1	0.216734	HOXB-AS3
chr17	48582415	48582438	1	0.216734	HOXB3
chr13	48601127	48601128	1	0.305556	NA
chr22	48621775	48621776	1	-0.366667	TAFA5
chr8	48666139	48666140	1	-0.322581	AC022915,2
chr14	48667065	48667110	1	-0.214583	NA
chr14	48680383	48680384	1	-0.141393	NA
chr16	48681237	48681238	1	-0.242105	AC007611,1
chr11	48718892	48718893	1	-0.345588	NA
chr8	48789163	48789164	1	-0.354839	NA
chr6	48904328	48904329	1	-0.0860183	NA
chr6	48933642	48933643	1	-0.148309	NA
chr6	48944394	48944395	1	0.244366	NA
chr13	48999147	48999148	1	-0.252147	FNDC3A
chr2	49002471	49002472	1	-0.318376	AC009975,1
chr2	49002471	49002472	1	-0.318376	FSHR
chr16	49011794	49011795	1	-0.261905	NA
chr11	49029390	49029391	1	-0.200577	TRIM49B
chr17	49039963	49039982	1	-0.259852	IGF2BP1
chr8	49097872	49097873	1	-0.27521	AC044893,1
chr16	49099609	49099610	1	-0.131245	AC044798,3
chr2	49216005	49216006	1	-0.295133	AC009975,1
chr2	49216005	49216006	1	-0.295133	AC009975,2
chr11	49223123	49223251	1	-0.174422	NA
chr2	49249970	49249971	1	-0.220484	AC009975,1
chr2	49249970	49249971	1	-0.220484	AC009975,2
chr6	49257896	49257897	1	-0.294872	NA
chr16	49300382	49300383	1	0.288095	AC007614,1
chr12	49366199	49366496	1	0.226336	NA
chr16	49387306	49387307	1	-0.184701	C16orf78
chr14	49417206	49417207	1	-0.163369	NA
chr13	49443453	49443456	2	0.460591	CAB39L
chr11	49449549	49449700	1	-0.163821	NA
chr16	49555500	49555501	1	-0.212335	ZNF423
chr22	49599323	49599324	1	-0.324138	C22orf34
chr2	49603418	49603419	1	-0.286667	NA
chr11	49627263	49627264	1	-0.131656	AC136759,1
chr22	49695851	49695852	1	-0.145092	NA
chr18	49754300	49754545	1	-0.111969	NA
chr22	49820763	49820764	1	-0.371212	BRD1
chr13	49833340	49833503	1	-0.0861833	NA
chr17	49899506	49899507	1	-0.361111	AC027801,2
chr6	49910450	49910452	1	-0.164512	NA
chr16	49988601	49988602	1	-0.287692	NA
chr8	49989607	49989609	1	-0.0932294	SNTG1
chr19	50003511	50003547	2	-0.214184	VRK3
chr8	50004488	50004489	1	-0.232337	SNTG1
chr2	50036729	50036730	1	-0.30303	NRXN1
chr19	50086870	50086871	1	0.305195	NA
chr2	50116511	50116512	1	-0.357143	NRXN1
chr8	50122407	50122408	1	-0.344376	SNTG1
chr22	50152706	50152707	1	-0.283333	MOV10L1
chr17	50171257	50171258	1	-0.296296	SGCA
chr5	50178799	50178800	1	-0.270531	NA
chr6	50179070	50179071	1	-0.236074	AL138826,1
chr8	50195938	50195939	1	-0.366667	SNTG1
chr17	50202964	50202965	1	-0.333333	AC015909,1
chr18	50217646	50217916	1	-0.155603	NA
chr3	50225925	50225933	1	0.32	NA
chr5	50453030	50453031	1	-0.246604	NA
chr8	50571760	50571761	1	-0.31891	SNTG1
chr6	50621976	50621977	1	-0.140408	AL135908,1
chr16	50632276	50632277	1	-0.299335	NKD1
chr16	50636858	50636859	1	-0.293233	NKD1
chr6	50644593	50644594	1	-0.188921	NA
chr11	50651086	50651087	1	-0.255694	NA
chr3	50683959	50683960	1	-0.341538	DOCK3
chr8	50685977	50685995	1	-0.174463	SNTG1
chr8	50819592	50819593	1	-0.136704	NA
chr16	50819988	50819989	1	-0.322917	NA
chr8	50839390	50839391	1	-0.172557	NA
chr19	50870193	50870244	2	-0.208569	KLK2
chr8	50944672	50944673	1	-0.326797	NA
chr16	50975160	50975161	1	-0.388889	NA
chr2	50996643	50996644	1	-0.279365	NRXN1
chr10	51012352	51012353	1	-0.285948	PRKG1
chr13	51065306	51065307	1	-0.278075	GUCY1B2
chr2	51100522	51100523	1	-0.278469	AC007402,1
chr2	51100522	51100523	1	-0.278469	NRXN1
chr14	51147195	51147196	1	-0.145186	NA
chr13	51208206	51208297	1	-0.155662	NA
chr13	51244286	51244287	1	-0.29902	FAM124A
chr6	51312189	51312190	1	-0.328571	NA
chr8	51394273	51394274	1	-0.25	PXDNL
chr2	51394842	51394843	1	0.165193	AC007402,1
chr2	51396793	51396794	1	0.167264	AC007402,1
chr6	51403671	51403793	1	-0.108457	NA
chr16	51419443	51419444	1	0.273657	AC007344,1
chr16	51419443	51419444	1	0.273657	AC087564,1
chr14	51435373	51435440	1	-0.130379	NA
chr19	51483805	51483836	2	-0.238095	CEACAM18
chr17	51519316	51519317	1	-0.283088	LINC02073
chr20	51531689	51531983	1	-0.152478	NFATC2
chr17	51551146	51551147	1	-0.382979	NA
chr20	51563211	51563452	1	0.0801668	NA
chr19	51566358	51566360	1	-0.141604	NA
chr2	51567615	51567616	1	-0.18481	AC007402,1
chr6	51572850	51572851	1	-0.253968	NA
chr2	51588150	51588151	1	-0.185274	AC007402,1
chr16	51634172	51634174	1	-0.173106	HNRNPA1P48
chr2	51659766	51659767	1	-0.254902	AC007402,1
chr17	51668171	51668172	1	-0.466667	CA10
chr5	51692841	51692842	1	-0.357143	NA
chr2	51723962	51723963	1	0.149673	AC007402,1
chr3	51776497	51776498	1	-0.225071	NA
chr2	51780810	51780811	1	-0.393665	AC007402,1
chr10	51811469	51811471	1	-0.16723	PRKG1
chr17	51813670	51813671	1	-0.292683	CA10
chr14	51881728	51881729	1	-0.138225	GNG2
chr6	51893308	51893309	1	-0.265244	PKHD1
chr13	51928361	51928371	1	-0.248889	NA
chr6	51937697	51937698	1	-0.423077	PKHD1
chr16	51983836	51983837	1	-0.251994	NA
chr17	51988246	51988247	1	-0.0940352	CA10
chr5	52001297	52001298	1	-0.345588	NA
chr5	52015385	52015386	1	-0.243845	LINC02118
chr14	52022612	52022613	1	-0.291444	NID2
chr17	52049582	52049583	1	-0.22949	CA10
chr5	52054401	52054402	1	-0.127286	LINC02118
chr13	52077248	52077249	1	-0.318277	NEK5
chr16	52126449	52126450	1	-0.283245	NA
chr16	52147059	52147060	1	-0.239583	NA
chr5	52149884	52149885	1	-0.225071	NA
chr4	52158894	52158895	1	-0.0964011	NA
chr5	52158949	52158950	1	-0.160183	NA
chr16	52185284	52185285	1	-0.243506	NA
chr5	52206920	52206921	1	-0.244038	NA
chr13	52311038	52311039	1	-0.283208	TPTE2P2
chr8	52330580	52330581	1	-0.254446	ST18
chr5	52350551	52350552	1	-0.380952	NA
chr19	52355039	52355040	1	-0.293706	ZNF610
chr20	52367884	52368314	1	-0.116541	LINC01524
chr17	52401523	52401524	1	-0.232143	LINC01982
chr6	52408668	52408674	2	-0.371795	EFHC1
chr16	52445442	52445443	1	-0.301455	TOX3
chr8	52445564	52445574	3	-0.333333	ST18
chr19	52463364	52463365	1	-0.29902	ZNF578
chr3	52488935	52488936	1	-0.235162	NISCH
chr2	52491777	52491778	1	0.145944	NA
chr6	52512367	52512368	1	-0.295977	EFHC1
chr6	52512367	52512368	1	-0.295977	TRAM2
chr10	52580866	52580867	1	-0.310924	LNCAROD
chr10	52624447	52624448	1	-0.228266	LNCAROD
chr5	52630924	52630925	1	-0.258824	NA
chr2	52689032	52689033	1	-0.253846	NA
chr6	52736813	52736814	1	-0.380952	NA
chr4	52745352	52745353	1	-0.264706	ERVMER34-1
chr4	52745352	52745353	1	-0.264706	LINC01618
chr19	52778722	52778723	1	-0.393939	ZNF600
chr16	52841774	52841775	1	-0.30622	NA
chr5	52842523	52842524	1	-0.24	ITGA1
chr4	52847285	52847286	1	-0.238095	LINC01618
chr2	52889408	52889409	1	0.548387	AC010967,1
chr5	52896583	52896584	1	-0.287115	ITGA1
chr8	52921271	52921272	1	-0.0977317	NA
chr10	52926459	52926460	1	-0.388889	NA
chr17	52956483	52956484	1	-0.288931	NA
chr10	52972263	52972264	1	-0.303571	NA
chr5	53060165	53060166	1	-0.26087	ITGA2
chr4	53080487	53080552	1	0.0873016	SCFD2
chr5	53126609	53126610	1	-0.252013	AC008966,1
chr4	53140438	53140439	1	-0.26203	SCFD2
chr13	53144362	53144363	1	-0.346667	LINC01065
chr5	53145904	53145905	1	-0.322674	NA
chr5	53157055	53157056	1	-0.263889	NA
chr3	53162811	53162812	1	-0.325758	PRKCD
chr14	53191855	53191973	1	-0.0988889	AL365295,1
chr3	53207468	53207469	1	0.242424	NA
chr18	53227714	53228245	1	-0.0805634	DCC
chr10	53234320	53234321	1	-0.416667	NA
chr2	53272248	53272249	1	-0.144715	NA
chr17	53313446	53313447	1	-0.23913	AC034268,2
chr5	53343965	53343966	1	-0.316071	NA
chr17	53376324	53376325	1	-0.151459	AC034268,2
chr8	53447347	53447348	1	0.173763	AC022034,3
chr8	53458210	53458211	1	0.164322	AC022034,3
chr4	53473041	53473042	1	0.132399	AC058822,1
chr4	53473041	53473042	1	0.132399	LNX1
chr13	53479238	53479239	1	0.139441	AL356295,1
chr19	53482976	53482977	1	0.25096	ZNF813
chr14	53571718	53571719	1	-0.399287	AL365295,1
chr8	53605915	53605917	1	-0.135897	NA
chr10	53607591	53607724	1	-0.174603	NA
chr13	53635440	53635441	1	-0.201294	AL356295,1
chr19	53644655	53644656	1	-0.342199	NA
chr1	53650316	53650317	1	-0.313321	GLIS1
chr3	53660496	53660497	1	-0.242015	CACNA1D
chr14	53686649	53686650	1	-0.386364	AL365295,1
chr14	53686649	53686650	1	-0.386364	LINC02331
chr2	53690665	53690713	1	-0.0807447	ASB3
chr6	53698768	53698769	1	-0.272425	NA
chr2	53728714	53728715	1	-0.346352	ASB3
chr10	53759445	53759446	1	-0.093744	NA
chr8	53774663	53774664	1	-0.333333	ATP6V1H
chr14	53828930	53828931	1	0.229101	AL365295,1
chr14	53828930	53828931	1	0.229101	LINC02331
chr8	53829482	53829483	1	-0.301587	ATP6V1H
chr4	53845292	53845293	1	-0.290476	AC058822,1
chr6	53907919	53907920	1	-0.166416	LRRC1
chr14	53918431	53918432	1	-0.34127	NA
chr10	53920057	53920159	1	-0.188732	PCDH15
chr4	53925869	53925946	1	-0.0926561	AC058822,1
chr3	53940106	53940107	1	-0.30444	NA
chr10	54052889	54052890	1	-0.295238	PCDH15
chr16	54138230	54138231	1	-0.17759	FTO
chr8	54198250	54198251	1	-0.125234	NA
chr3	54245703	54245704	1	-0.234994	CACNA2D3
chr19	54260149	54260150	1	-0.308081	NA
chr5	54260411	54260412	1	-0.257358	ARL15
chr16	54300602	54300603	1	-0.37931	NA
chr13	54323487	54323488	1	0.178869	NA
chr8	54360080	54360081	1	-0.285256	NA
chr3	54404695	54404696	1	-0.144649	CACNA2D3
chr10	54439041	54439042	1	0.202824	PCDH15
chr17	54523336	54523337	1	-0.23913	NA
chr13	54547871	54547872	1	-0.0857185	NA
chr13	54583682	54583683	1	-0.328571	AL442636,1
chr13	54601663	54601664	1	-0.255493	AL442636,1
chr5	54608536	54608537	1	-0.199391	NA
chr3	54640611	54640612	1	-0.409091	CACNA2D3
chr10	54740303	54740304	1	0.126725	PCDH15
chr10	54758855	54758986	1	0.0990506	PCDH15
chr10	54803530	54803531	1	-0.309441	PCDH15
chr3	54869576	54869778	1	-0.208431	CACNA2D3
chr17	54905998	54906114	1	-0.248966	TOM1L1
chr3	54962923	54962924	1	-0.318182	CACNA2D3
chr3	54962923	54962924	1	-0.318182	LRTM1
chr5	54989300	54989302	1	-0.223291	ESM1
chr16	54999088	54999089	1	-0.325758	NA
chr2	55080902	55080903	1	0.13542	RTN4
chr3	55131456	55131457	1	-0.181107	NA
chr13	55139321	55139322	1	0.101823	LINC02335
chr16	55205223	55205224	1	-0.275641	NA
chr8	55305300	55305301	1	-0.256522	XKR4
chr10	55337859	55337860	1	-0.134193	AC016822,1
chr10	55337859	55337860	1	-0.134193	PCDH15
chr18	55354906	55355351	2	0.154155	TCF4
chr10	55381817	55381882	1	-0.128332	AC016822,1
chr10	55381817	55381882	1	-0.128332	PCDH15
chr16	55470328	55470361	1	-0.203463	MMP2
chr13	55474172	55474173	1	-0.0955472	NA
chr10	55484885	55484886	1	-0.142925	AC016822,1
chr10	55484885	55484886	1	-0.142925	PCDH15
chr13	55485103	55485104	1	-0.138186	NA
chr17	55494862	55494863	1	-0.283493	SMIM36
chr10	55539033	55539034	1	-0.0986642	AC016822,1
chr10	55539033	55539034	1	-0.0986642	PCDH15
chr13	55541267	55541268	1	-0.0826331	AL354821,1
chr11	55666925	55666926	1	-0.10368	NA
chr13	55679263	55679265	1	-0.230738	NA
chr13	55736290	55736291	1	-0.261905	NA
chr14	55736818	55736819	1	-0.279923	NA
chr14	55793562	55793563	1	-0.302128	LINC00520
chr2	55835928	55835929	1	-0.208516	NA
chr14	55854826	55854919	1	-0.190209	NA
chr3	55868592	55868791	1	-0.23023	ERC2
chr2	55888069	55888070	1	-0.246615	EFEMP1
chr20	55935420	55935721	1	-0.13212	NA
chr6	55962283	55962284	1	-0.112839	NA
chr10	55965214	55965215	1	-0.40625	NA
chr19	55977394	55977395	1	-0.176186	NLRP8
chr10	56000684	56000685	1	-0.202571	NA
chr19	56026672	56026673	1	-0.258009	NLRP5
chr2	56062569	56062570	1	-0.0886505	AC011306,1
chr16	56113381	56113382	1	0.301948	AC007495,1
chr16	56113381	56113382	1	0.301948	AC040168,1
chr11	56163538	56163539	1	-0.235203	NA
chr13	56182633	56182634	1	-0.319149	NA
chr2	56242674	56242675	1	-0.231383	AC007744,1
chr2	56242674	56242675	1	-0.231383	CCDC85A
chr2	56271528	56271529	1	-0.283966	AC007744,1
chr2	56271528	56271529	1	-0.283966	CCDC85A
chr3	56281978	56282168	1	-0.124252	ERC2
chr2	56389307	56389318	1	-0.22573	NA
chr19	56416588	56416589	1	-0.0912906	ZNF583
chr6	56428958	56428959	1	-0.275641	NA
chr13	56455133	56455134	1	-0.218132	NA
chr8	56463782	56463783	1	-0.169056	AC012349,1
chr13	56467041	56467043	1	-0.0989593	NA
chr10	56474001	56474006	1	-0.215668	NA
chr14	56491556	56491618	1	0.263158	TMEM260
chr17	56550436	56550437	1	-0.299003	NA
chr5	56554648	56554649	1	-0.296667	C5orf67
chr19	56587857	56587858	1	-0.358974	ZNF470
chr11	56618884	56618885	1	-0.27451	NA
chr13	56640308	56640309	1	-0.283626	NA
chr6	56659344	56659345	1	-0.118622	DST
chr11	56663143	56663327	1	-0.101893	NA
chr2	56694391	56694392	1	0.139429	NA
chr17	56698548	56698549	1	-0.287719	NA
chr17	56708748	56708749	1	-0.340502	NA
chr3	56762481	56762482	1	-0.236364	ARHGEF3
chr2	56777145	56777146	1	0.352941	NA
chr5	56786811	56786812	1	-0.22037	NA
chr6	56787377	56787378	1	-0.252778	DST
chr13	56811145	56811146	1	-0.29902	NA
chr20	56935201	56935642	1	-0.141166	NA
chr19	56963369	56963515	1	-0.105999	NA
chr8	56970863	56970864	1	-0.260256	IMPAD1
chr19	56978829	56978830	1	-0.252778	NA
chr14	57018877	57018878	1	-0.315789	AL137100,3
chr14	57018877	57018878	1	-0.315789	OTX2-AS1
chr8	57028536	57028537	1	-0.271046	NA
chr3	57030391	57030392	1	-0.266304	ARHGEF3
chr8	57143571	57143617	1	0.190395	LINC01606
chr10	57177122	57177123	1	-0.158616	NA
chr3	57183119	57183120	1	-0.4	NA
chr11	57185800	57185801	1	-0.275915	LRRC55
chr8	57220595	57220596	1	-0.269608	LINC01606
chr10	57260940	57261124	2	-0.128309	NA
chr6	57280150	57280151	1	-0.136337	NA
chr5	57311647	57311648	1	-0.212043	NA
chr8	57378056	57378057	1	-0.245989	NA
chr13	57401705	57401712	1	0.233276	NA
chr2	57411463	57411464	1	0.125979	NA
chr10	57413999	57414146	1	-0.192647	NA
chr10	57435933	57436045	1	-0.130024	NA
chr2	57475343	57475344	1	-0.272031	NA
chr5	57475608	57475638	2	-0.196416	AC025470,2
chr10	57491335	57491336	1	-0.199726	NA
chr14	57502296	57502297	1	-0.31746	NA
chr5	57512677	57512678	1	-0.331429	AC025470,2
chr10	57526184	57526185	1	-0.260652	NA
chr14	57535326	57535327	1	-0.395349	NA
chr5	57582831	57582832	1	-0.291667	AC008780,1
chr13	57585181	57585192	2	-0.235145	NA
chr19	57590393	57590425	1	-0.234027	ZIK1
chr10	57613541	57613542	1	0.273449	NA
chr14	57637472	57637473	1	-0.375	SLC35F4
chr5	57653555	57653556	1	-0.143983	AC008780,2
chr2	57657596	57657597	1	-0.238739	NA
chr4	57703876	57703948	1	0.11018	NA
chr5	57715502	57715503	1	-0.141738	NA
chr17	57750474	57750475	1	0.26087	NA
chr5	57759364	57759365	1	-0.146564	NA
chr2	57819074	57819075	1	-0.087956	NA
chr2	57871822	57871824	2	-0.229565	NA
chr18	57937098	57937744	1	-0.176314	NA
chr8	57964561	57964562	1	-0.252316	LINC01602
chr2	58079676	58079677	1	-0.0924775	VRK2
chr16	58137834	58137979	1	-0.117653	AC009107,2
chr5	58144589	58144590	1	-0.0951282	AC008786,1
chr5	58165245	58165383	1	-0.201575	NA
chr5	58254720	58254730	2	-0.285354	NA
chr17	58261509	58261510	1	-0.14026	LPO
chr13	58266646	58266647	1	-0.0912566	NA
chr17	58293494	58293495	1	-0.117343	NA
chr13	58295984	58295985	1	-0.185714	NA
chr4	58336685	58336686	1	0.123272	NA
chr4	58384150	58384151	1	-0.132604	NA
chr5	58428760	58428761	1	-0.388031	NA
chr10	58497605	58497606	1	-0.272874	NA
chr19	58497606	58497607	1	-0.333333	SLC27A5
chr13	58499160	58499161	1	-0.237566	NA
chr13	58505067	58505068	1	-0.303763	NA
chr4	58547080	58547081	1	-0.290541	NA
chr3	58564493	58564543	1	-0.185372	FAM107A
chr10	58596970	58596971	1	-0.291667	BICC1
chr2	58600748	58600749	1	-0.260982	LINC01122
chr17	58610566	58610567	1	-0.254743	TEX14
chr20	58627657	58628789	1	-0.174389	NA
chr3	58714898	58714899	1	-0.352941	NA
chr10	58729071	58729072	1	0.295238	BICC1
chr5	58743578	58743579	1	-0.37931	AC016642,1
chr5	58743578	58743579	1	-0.37931	RAB3C
chr13	58755514	58755515	1	-0.10778	NA
chr3	58761279	58761280	1	-0.146858	C3orf67
chr4	58783454	58783455	1	-0.176836	AC017091,1
chr3	58794481	58794482	1	-0.25731	C3orf67
chr5	58795046	58795047	1	-0.339744	AC016642,1
chr5	58795046	58795047	1	-0.339744	RAB3C
chr3	58821737	58821738	1	-0.266667	C3orf67
chr3	58832357	58832359	1	-0.2125	C3orf67
chr3	58832357	58832359	1	-0.2125	C3orf67-AS1
chr11	58895228	58895229	1	-0.196825	GLYATL2
chr10	58964012	58964013	1	-0.269231	NA
chr11	58982015	58982016	1	-0.262687	AP001636,3
chr11	58982015	58982016	1	-0.262687	GLYATL1
chr11	58982015	58982016	1	-0.262687	GLYATL1P1
chr2	58996824	58996971	1	-0.180883	LINC01122
chr4	58998536	58998538	1	-0.172857	LINC02429
chr16	59015953	59015954	1	-0.161341	AC106793,1
chr2	59033171	59033172	1	-0.271795	AC007092,1
[truncated: 1,982 more rows]
