# Supplementary material for: DNA Methylation Signature in Mononuclear Cells and Proinflammatory Cytokines May Define Molecular Subtypes in Sporadic Meniere Disease
Source: Preprints.org preprint supplement (doi:10.20944/preprints202110.0030.v1), 2021-10-01
Supplement: Supplementary file 13 [file Table_S6.xls]

## Sheet: Folha1
chr	start	end	nCpG	methdiff	gene
chr16	39180	39181	1	-0.333333	NA
chr5	56907	57077	1	0.175	NA
chr10	61959	61960	1	-0.131071	TUBB8
chr18	89235	89236	1	-0.375	NA
chr4	110823	110861	1	-0.0914286	NA
chr19	244427	244428	1	0.200488	LINC01002
chr20	247325	247326	1	-0.132713	NA
chr19	256636	256649	1	0.259146	NA
chr10	308725	308726	1	-0.307018	DIP2C
chr8	309817	309818	1	-0.310924	NA
chr18	323672	323673	1	-0.388889	COLEC12
chr16	339225	339279	1	-0.163291	AXIN1
chr17	364598	364689	1	-0.261379	RPH3AL
chr2	373586	373587	1	0.3125	NA
chr6	397778	397779	1	-0.333333	IRF4
chr8	420686	420687	1	-0.236063	FBXO25
chr2	422956	422957	1	-0.368421	AC105393,1
chr17	428007	428008	1	-0.37619	C17orf97
chr2	624764	624765	1	-0.337719	NA
chr8	707651	707652	1	-0.277778	ERICH1
chr16	725733	725734	1	-0.318182	CCDC78
chr12	758148	758727	2	-0.117586	WNK1
chr3	814578	814579	1	-0.181051	LINC01266
chr19	869956	869957	1	-0.360577	MED16
chr2	874094	874095	1	0.35	NA
chr11	876377	876378	1	-0.357143	CHID1
chr20	878964	878993	1	-0.210337	ANGPT4
chr19	886559	886565	1	-0.308571	MED16
chr6	901898	901899	1	-0.336134	NA
chr20	948249	948357	1	-0.171981	NA
chr20	976133	976134	1	-0.357143	RSPO4
chr2	1070426	1070427	1	-0.319853	SNTG2
chr4	1104406	1104407	1	-0.373684	RNF212
chr4	1152058	1152059	1	0.307692	AC092535,2
chr4	1152058	1152059	1	0.307692	TMED11P
chr6	1155424	1155425	1	-0.339286	NA
chr16	1160664	1160665	1	-0.333333	CACNA1H
chr5	1172835	1172875	1	-0.226045	NA
chr17	1193777	1193931	2	-0.102541	ABR
chr11	1198401	1198402	1	0.421053	MUC5AC
chr16	1261214	1261269	1	0.2395	PRSS29P
chr19	1283763	1283764	1	-0.3125	NA
chr6	1294381	1294382	1	0.182692	NA
chr17	1299958	1299959	1	-0.315789	TRARG1
chr4	1330959	1330962	1	-0.277143	MAEA
chr10	1359543	1359548	1	0.233731	ADARB2
chr10	1369897	1369898	1	0.375	ADARB2
chr2	1421141	1421142	1	-0.252525	AC105450,1
chr2	1421141	1421142	1	-0.252525	TPO
chr10	1440902	1440903	1	-0.331818	ADARB2
chr11	1453157	1453158	1	-0.388889	BRSK2
chr2	1489221	1489222	1	-0.274074	AC105450,1
chr2	1489221	1489222	1	-0.274074	TPO
chr20	1491025	1491099	2	-0.346048	SIRPB2
chr16	1527792	1527793	1	-0.4	IFT140
chr16	1534451	1534641	2	0.315556	IFT140
chr16	1534451	1534641	2	0.315556	TMEM204
chr2	1568194	1568221	2	0.291579	AC105450,1
chr2	1568194	1568221	2	0.291579	AC141930,1
chr17	1617891	1617892	1	-0.333333	SLC43A2
chr11	1622269	1622270	1	-0.281859	NA
chr19	1668163	1668164	1	0.185136	NA
chr16	1708970	1708971	1	-0.304348	MAPK8IP3
chr10	1778049	1778050	1	-0.302083	NA
chr4	1841587	1841625	1	0.265766	LETM1
chr18	1934407	1934408	1	-0.346154	AP005230,1
chr18	1934407	1934408	1	-0.346154	AP005262,2
chr16	1939555	1939556	1	-0.360577	MSRB1
chr17	1966490	1966539	1	-0.282432	RTN4RL1
chr18	2002433	2002434	1	-0.232733	AP005230,1
chr18	2002433	2002434	1	-0.232733	AP005262,2
chr17	2027714	2027715	1	0.340909	NA
chr20	2044296	2044297	1	-0.369048	NA
chr4	2102535	2102536	1	0.375	HAUS3
chr4	2102535	2102536	1	0.375	POLN
chr20	2103653	2103654	1	0.375	STK35
chr17	2155651	2155725	1	0.237374	SMG6
chr11	2203069	2203070	1	-0.357143	NA
chr10	2272466	2272549	2	-0.0879216	NA
chr11	2282636	2282637	1	0.138828	NA
chr8	2382611	2382674	2	-0.0966514	NA
chr16	2422742	2422883	1	-0.148148	ABCA17P
chr11	2450614	2450633	2	-0.247608	KCNQ1
chr20	2631070	2631071	1	-0.153103	TMC2
chr8	2634823	2634824	1	-0.244444	NA
chr20	2641375	2641376	1	-0.327751	TMC2
chr10	2708538	2708539	1	-0.385185	NA
chr19	2711225	2711509	2	0.134524	NA
chr4	2763927	2763982	2	0.2556	NA
chr17	2767146	2767192	1	-0.299496	AC002316,1
chr8	2851215	2851216	1	0.156836	NA
chr10	2947634	2947635	1	-0.333333	NA
chr20	2986784	2986819	1	0.313725	PTPRA
chr18	3029239	3029282	1	-0.264286	NA
chr16	3065173	3065174	1	-0.416667	NA
chr16	3076879	3077078	1	-0.350649	AC108134,3
chr16	3076879	3077078	1	-0.350649	IL32
chr5	3086855	3087020	1	-0.151634	NA
chr18	3092817	3092818	1	-0.254737	MYOM1
chr19	3098965	3098986	1	0.247863	GNA11
chr12	3118954	3120469	1	-0.129076	TSPAN9
chr2	3139707	3139708	1	-0.588889	AC019118,2
chr20	3172769	3172770	1	0.583333	LZTS3
chr17	3212211	3212212	1	-0.141335	OR1A1
chr8	3241720	3241721	1	-0.333333	CSMD1
chr11	3402853	3402854	1	-0.354545	TSSC2
chr12	3468179	3468504	1	-0.234091	PRMT8
chr4	3469787	3469788	1	-0.333333	DOK7
chr4	3481546	3481547	1	0.409091	DOK7
chr2	3532948	3532949	1	-0.35	AC108488,1
chr2	3532948	3532949	1	-0.35	AC108488,2
chr16	3533900	3533901	1	-0.428571	AC004494,2
chr16	3533900	3533901	1	-0.428571	CLUAP1
chr4	3542194	3542195	1	0.126786	NA
chr12	3575295	3575506	1	-0.156757	PRMT8
chr6	3620994	3620995	1	-0.293103	AL033523,1
chr18	3661175	3661176	1	-0.294872	DLGAP1
chr4	3754927	3754928	1	0.363636	NA
chr16	3767729	3767767	1	0.161435	CREBBP
chr4	3774061	3774093	1	0.0928571	NA
chr10	3806690	3806810	2	-0.220513	NA
chr4	3864721	3864722	1	-0.471154	NA
chr6	3873925	3873926	1	-0.24424	AL391422,2
chr2	3888685	3888697	1	-0.199577	NA
chr16	3914934	3914951	1	-0.360795	NA
chr6	3948089	3948132	1	-0.104878	NA
chr17	3957054	3957085	1	0.392977	ATP2A3
chr2	3998627	3998628	1	-0.35119	NA
chr4	4016347	4016349	1	0.169118	NA
chr19	4035133	4035141	1	0.339048	PIAS4
chr2	4067333	4067459	1	-0.279412	NA
chr10	4122058	4122059	1	-0.351974	NA
chr19	4134882	4134883	1	-0.296537	NA
chr19	4194390	4194391	1	-0.392857	ANKRD24
chr8	4232731	4232779	2	-0.214194	CSMD1
chr8	4273695	4273790	1	-0.294872	CSMD1
chr2	4315049	4315050	1	-0.0852871	NA
chr16	4345943	4345944	1	0.368421	CORO7-PAM16
chr16	4345943	4345944	1	0.368421	PAM16
chr16	4362188	4362189	1	-0.4	CORO7
chr16	4362188	4362189	1	-0.4	CORO7-PAM16
chr17	4396393	4396581	1	-0.317873	NA
chr8	4434075	4434076	1	-0.328889	CSMD1
chr17	4488752	4488753	1	-0.421053	NA
chr10	4528245	4528246	1	0.146318	NA
chr17	4642095	4642144	2	-0.41184	ALOX15
chr5	4650429	4650731	1	-0.113787	AC106799,2
chr6	4679538	4679539	1	-0.333333	NA
chr10	4697989	4697990	1	-0.101353	NA
chr4	4709123	4709124	1	-0.100797	STX18-AS1
chr19	4715959	4716039	2	-0.224597	DPP9
chr10	4730032	4730033	1	-0.293981	NA
chr4	4743830	4743831	1	-0.316667	STX18-AS1
chr20	4754132	4754436	2	0.209861	NA
chr11	4758281	4758282	1	-0.0985801	MMP26
chr19	4762331	4762332	1	-0.391304	NA
chr20	4826164	4826166	1	-0.235119	NA
chr20	4907023	4907024	1	-0.222222	SLC23A2
chr19	4977849	4977870	1	-0.336538	KDM4B
chr4	4981567	4981568	1	-0.367273	NA
chr2	4998160	4998161	1	-0.08	NA
chr11	5016944	5016945	1	-0.166667	NA
chr18	5123657	5123658	1	-0.180556	NA
chr10	5169109	5169252	1	-0.238182	AKR1C8P
chr8	5199090	5199091	1	-0.247492	NA
chr16	5209379	5209380	1	-0.326087	AC074051,5
chr2	5316463	5316464	1	-0.304813	NA
chr4	5339866	5339867	1	0.306667	STK32B
chr18	5379203	5379333	1	-0.220011	NA
chr4	5403234	5403235	1	-0.235521	STK32B
chr8	5406089	5406090	1	-0.404762	NA
chr10	5432424	5432425	1	-0.183494	NET1
chr8	5433403	5433404	1	0.315217	NA
chr10	5459655	5459656	1	-0.313187	NA
chr18	5472746	5472747	1	-0.277778	AP005059,2
chr18	5472746	5472747	1	-0.277778	EPB41L3
chr18	5526024	5526025	1	-0.366071	EPB41L3
chr10	5587209	5587372	2	-0.362003	NA
chr16	5594308	5594309	1	0.490385	RBFOX1
chr11	5600478	5600484	2	0.377261	AC104389,5
chr11	5600478	5600484	2	0.377261	TRIM6
chr11	5600478	5600484	2	0.377261	TRIM6-TRIM34
chr2	5674946	5674981	1	-0.185281	AC108025,1
chr2	5674946	5674981	1	-0.185281	LINC01248
chr11	5698668	5698669	1	0.384615	TRIM22
chr11	5698668	5698669	1	0.384615	TRIM5
chr4	5766933	5767055	1	-0.236053	CRMP1
chr4	5766933	5767055	1	-0.236053	EVC
chr17	5788584	5788599	1	-0.175473	AC007846,1
chr17	5788584	5788599	1	-0.175473	AC007846,2
chr17	5823009	5823010	1	-0.289003	AC007846,1
chr17	5823009	5823010	1	-0.289003	AC007846,2
chr6	5855221	5855222	1	-0.411538	AL136307,1
chr18	5871648	5871649	1	-0.256579	MIR3976HG
chr4	5918324	5918325	1	-0.275	C4orf50
chr6	5930535	5930552	1	-0.285714	NA
chr8	5938495	5938496	1	0.29484	NA
chr2	5989901	5990093	1	-0.304611	SILC1
chr19	5993137	5993145	1	-0.161949	AC011444,1
chr10	6022930	6022931	1	0.316667	IL2RA
chr19	6118063	6118064	1	-0.100969	AC011444,3
chr19	6118063	6118064	1	-0.100969	RFX2
chr10	6208502	6208503	1	-0.345833	PFKFB3
chr16	6224614	6224615	1	0.284091	RBFOX1
chr20	6252942	6252943	1	-0.389706	NA
chr5	6281197	6281546	1	-0.202814	NA
chr11	6286966	6286967	1	0.425	NA
chr10	6326095	6326096	1	-0.327731	LINC02649
chr8	6390167	6390168	1	-0.275401	NA
chr4	6431849	6431850	1	-0.333333	PPP2R2C
chr18	6441960	6441961	1	-0.161329	NA
chr20	6513304	6513305	1	0.166105	CASC20
chr18	6521387	6521388	1	-0.143593	LINC01387
chr5	6521504	6521797	1	-0.136379	NA
chr18	6666320	6666321	1	-0.304029	NA
chr8	6680668	6680669	1	-0.214575	MCPH1-AS1
chr11	6726372	6726373	1	-0.0939427	GVINP1
chr8	6798942	6798943	1	-0.346154	NA
chr20	6860911	6860912	1	-0.339181	NA
chr10	6874952	6874953	1	-0.297143	AL392086,1
chr10	6874952	6874953	1	-0.297143	AL392086,3
chr10	6874952	6874953	1	-0.297143	LINC00707
chr8	6875746	6875747	1	0.242424	AF233439,1
chr8	6875746	6875747	1	0.242424	DEFB1
chr16	6925521	6925673	1	-0.233603	RBFOX1
chr8	6964517	6964518	1	0.256944	NA
chr16	6984430	6984431	1	0.306667	RBFOX1
chr5	6989619	6989620	1	-0.165062	LINC02196
chr2	7010524	7010627	1	0.225543	RNF144A
chr18	7029588	7029589	1	-0.396154	LAMA1
chr4	7050607	7050608	1	-0.363636	TADA2B
chr16	7103494	7103495	1	-0.238329	RBFOX1
chr18	7104241	7104242	1	-0.411765	LAMA1
chr11	7137617	7137618	1	-0.217988	NA
chr11	7143826	7143827	1	-0.165844	NA
chr20	7150322	7150323	1	-0.291667	LINC01428
chr12	7165009	7165535	2	-0.181237	NA
chr20	7214549	7214589	1	-0.312418	LINC01428
chr2	7220079	7220080	1	-0.125	NA
chr19	7221073	7221074	1	-0.25	INSR
chr11	7349774	7349775	1	-0.301449	SYT9
chr4	7400514	7400677	1	-0.0954049	SORCS2
chr11	7429535	7429536	1	-0.382775	AC107884,1
chr11	7429535	7429536	1	-0.382775	SYT9
chr20	7430603	7430604	1	-0.292982	NA
chr4	7435539	7435579	1	-0.27381	SORCS2
chr17	7478656	7478657	1	0.354167	ZBTB4
chr11	7487586	7487587	1	0.347985	AC107884,1
chr11	7487586	7487587	1	0.347985	OLFML1
chr10	7501176	7501177	1	-0.31746	NA
chr18	7506167	7506168	1	-0.311905	NA
chr20	7515117	7515118	1	-0.286713	NA
chr9	7524686	7524687	1	-0.200501	NA
chr8	7536839	7536840	1	0.435	NA
chr6	7571964	7571965	1	-0.238095	DSP
chr16	7609657	7609658	1	-0.333333	RBFOX1
chr16	7614874	7614875	1	-0.336694	AC005774,2
chr16	7614874	7614875	1	-0.336694	RBFOX1
chr11	7656656	7656657	1	-0.294118	PPFIBP2
chr20	7675562	7675563	1	-0.12395	NA
chr4	7715460	7715485	1	0.282353	SORCS2
chr11	7766995	7767052	1	-0.181974	AC044810,2
chr11	7766995	7767052	1	-0.181974	AC044810,3
chr17	7798163	7798173	1	-0.305017	DNAH2
chr5	7802340	7803163	1	-0.086631	ADCY2
chr11	7844488	7844489	1	-0.259947	AC044810,2
chr11	7844488	7844489	1	-0.259947	AC044810,3
chr11	7856945	7856946	1	0.179128	AC044810,2
chr11	7856945	7856946	1	0.179128	AC044810,3
chr4	7880131	7880132	1	-0.267813	AFAP1
chr17	7881768	7881836	1	0.0833429	NAA38
chr16	7905720	7905725	1	-0.244108	AC093515,1
chr4	7907083	7907084	1	-0.547619	AFAP1
chr6	7923879	7923880	1	-0.228291	BLOC1S5-TXNDC5
chr6	7956337	7956338	1	-0.171801	BLOC1S5-TXNDC5
chr16	7999996	8000009	2	-0.35	AC093515,1
chr20	8021543	8021544	1	-0.23126	AL021396,1
chr4	8024302	8024303	1	0.566667	ABLIM2
chr20	8047537	8047538	1	-0.16787	NA
chr10	8057859	8057860	1	0.440217	GATA3
chr11	8072729	8072730	1	-0.293333	TUB
chr18	8180919	8180920	1	-0.375	PTPRM
chr4	8227683	8227691	2	0.363636	SH3TC1
chr4	8282487	8282488	1	-0.3125	HTRA3
chr19	8384287	8384288	1	-0.4	RAB11B-AS1
chr4	8393660	8393845	1	-0.279716	ACOX3
chr11	8394482	8394483	1	-0.231667	STK33
chr17	8438027	8438028	1	-0.3	NDEL1
chr10	8480254	8480255	1	-0.306667	NA
chr16	8493271	8493280	2	-0.372312	NA
chr2	8519558	8519559	1	-0.341014	LINC01814
chr4	8526468	8526469	1	-0.368421	NA
chr8	8537976	8537977	1	0.223486	NA
chr4	8553018	8553034	1	-0.351852	NA
chr16	8557394	8557395	1	-0.346591	TMEM114
chr8	8581603	8581604	1	-0.267593	NA
chr8	8604601	8604602	1	-0.269841	NA
chr8	8684341	8684342	1	-0.298319	NA
chr18	8695065	8695066	1	-0.391304	NA
chr19	8698375	8698376	1	0.294118	ACTL9
chr17	8716224	8716234	2	-0.278632	NA
chr4	8790976	8790977	1	0.338462	NA
chr20	8830095	8830101	1	-0.26366	PLCB1
chr6	8851483	8851484	1	-0.33046	HULC
chr18	8870140	8870175	1	-0.273333	NA
chr10	8957849	8957907	1	0.0917325	NA
chr20	8964158	8964159	1	-0.4375	PLCB1
chr10	9007281	9007282	1	-0.203194	NA
chr4	9010692	9010693	1	-0.224194	NA
chr10	9030354	9030355	1	-0.337438	NA
chr11	9033755	9033762	1	-0.290476	AC079296,1
chr11	9033755	9033762	1	-0.290476	SCUBE2
chr20	9041436	9041437	1	-0.29902	NA
chr20	9092080	9092264	1	-0.173429	PLCB4
chr20	9102135	9102136	1	-0.337719	PLCB4
chr6	9122095	9122136	1	-0.193548	HULC
chr10	9125343	9125344	1	-0.174713	NA
chr2	9259749	9259750	1	-0.352941	ASAP2
chr10	9261717	9261718	1	-0.320366	NA
chr16	9335097	9335098	1	-0.135357	NA
chr21	9340471	9340472	1	0.333333	CR381653,1
chr8	9388531	9388532	1	-0.332168	AC021242,2
chr8	9388531	9388532	1	-0.332168	AC022784,1
chr20	9410486	9410487	1	0.43609	PLCB4
chr10	9592948	9593116	1	-0.0875367	NA
chr5	9654855	9656037	1	-0.0877312	AC026787,1
chr5	9654855	9656037	1	-0.0877312	LINC02112
chr5	9654855	9656037	1	-0.0877312	TAS2R1
chr10	9663537	9663567	1	-0.284203	NA
chr20	9690539	9690540	1	-0.272727	PAK5
chr16	9764547	9764548	1	-0.307692	GRIN2A
chr17	9764862	9764863	1	-0.377273	AC027045,2
chr6	9829708	9829709	1	-0.347126	OFCC1
chr17	9841585	9841586	1	-0.330144	GLP2R
chr2	9891613	9891614	1	-0.178278	TAF1B
chr20	9898366	9898367	1	-0.225287	NA
chr16	9943726	9943727	1	-0.401099	GRIN2A
chr4	9944651	9944652	1	-0.357143	SLC2A9
chr20	9980025	9980150	1	-0.221429	NA
chr16	10023143	10023144	1	-0.296992	GRIN2A
chr4	10032406	10032407	1	-0.308908	SLC2A9
chr16	10055761	10055762	1	-0.262626	GRIN2A
chr16	10072661	10072662	1	0.278571	GRIN2A
chr17	10086222	10086223	1	-0.341615	AC005747,1
chr18	10144207	10144208	1	-0.392857	AP005271,1
chr4	10146751	10146752	1	-0.301754	NA
chr10	10175263	10175264	1	-0.111421	NA
chr6	10196976	10196977	1	-0.220275	OFCC1
chr6	10213411	10213575	1	-0.12039	NA
chr16	10226953	10226954	1	0.265116	AC022168,1
chr11	10250295	10250296	1	0.4	SBF2
chr11	10370831	10370832	1	-0.291667	AMPD3
chr18	10413561	10413681	1	-0.240107	AP006219,3
chr18	10413561	10413681	1	-0.240107	LINC01254
chr18	10435693	10435694	1	-0.25942	NA
chr10	10440731	10440891	1	-0.151613	CELF2-DT
chr10	10451770	10451771	1	0.227273	CELF2-DT
chr6	10519128	10519158	1	0.203056	GCNT2
chr8	10551538	10551539	1	-0.354167	PRSS55
chr11	10568736	10568748	1	-0.288194	LYVE1
chr11	10568736	10568748	1	-0.288194	MRVI1-AS1
chr17	10572735	10572736	1	-0.444853	MYHAS
chr12	10582514	10582890	1	-0.0891407	NA
chr4	10598016	10598017	1	-0.309524	CLNK
chr17	10607729	10607730	1	-0.118182	AC005323,1
chr17	10607729	10607730	1	-0.118182	MYHAS
chr8	10632079	10632352	1	0.100962	RP1L1
chr6	10644199	10644200	1	-0.101819	NA
chr18	10652039	10652040	1	-0.230769	NA
chr4	10655994	10656216	1	-0.0939716	CLNK
chr8	10673917	10673918	1	-0.511312	C8orf74
chr8	10673917	10673918	1	-0.511312	RP1L1
chr18	10690759	10690760	1	-0.333333	PIEZO2
chr19	10697691	10697692	1	-0.509091	NA
chr17	10712153	10712154	1	-0.285714	TMEM220
chr2	10730261	10730337	1	-0.212616	ATP6V1C2
chr8	10745089	10745091	1	-0.231592	AC105001,1
chr8	10745089	10745091	1	-0.231592	PINX1
chr4	10750073	10750074	1	-0.246212	NA
chr16	10765559	10765560	1	-0.280193	NUBP1
chr16	10765559	10765560	1	-0.280193	TVP23A
chr4	10785502	10785504	1	-0.19404	NA
chr4	10883488	10883489	1	-0.330827	NA
chr20	10895576	10895577	1	-0.333333	AL050403,1
chr20	10895576	10895577	1	-0.333333	AL050403,2
chr16	10914065	10914066	1	-0.311005	CIITA
chr18	10967703	10967705	1	-0.115313	PIEZO2
chr18	11069659	11069660	1	-0.203704	PIEZO2
chr4	11091187	11091217	1	-0.143228	NA
chr4	11120045	11120046	1	0.416667	NA
chr2	11120653	11120654	1	-0.337662	AC062028,1
chr12	11135909	11136196	1	-0.13761	AC018630,2
chr12	11135909	11136196	1	-0.13761	PRH1
chr12	11135909	11136196	1	-0.13761	TAS2R14
chr6	11151198	11151199	1	-0.366013	NA
chr10	11162876	11162877	1	-0.35	CELF2
chr11	11163013	11163014	1	-0.357143	LINC02752
chr16	11203597	11203598	1	-0.284689	AC007220,1
chr6	11218872	11218873	1	0.4	AL139807,1
chr6	11218872	11218873	1	0.4	NEDD9
chr10	11242585	11242586	1	-0.4375	CELF2
chr16	11254272	11254304	1	-0.313889	RMI2
chr8	11254931	11254932	1	-0.371212	LINC00529
chr20	11256766	11256767	1	-0.316667	AL049649,1
chr10	11270536	11270802	1	-0.127329	CELF2
chr12	11284682	11284918	1	-0.0846792	NA
chr19	11288504	11288529	1	-0.216862	NA
chr11	11308199	11308200	1	-0.370629	GALNT18
chr10	11308806	11308807	1	-0.176471	CELF2
chr10	11337555	11337575	1	0.307359	NA
chr20	11352793	11352794	1	-0.43083	NA
chr16	11370619	11370620	1	0.4	AC099489,1
chr16	11370619	11370620	1	0.4	RMI2
chr16	11384625	11384657	1	0.282609	AC099489,1
chr17	11394620	11394621	1	-0.1032	SHISA6
chr20	11419104	11419105	1	-0.276316	NA
chr16	11431880	11431881	1	-0.4	AC099489,1
chr18	11435446	11435447	1	-0.22381	NA
chr8	11442750	11442751	1	-0.333333	FAM167A
chr20	11491606	11491607	1	-0.343653	NA
chr20	11528690	11528691	1	-0.119876	NA
chr17	11559754	11559755	1	-0.333333	SHISA6
chr11	11606279	11606280	1	-0.370629	GALNT18
chr6	11634855	11634856	1	-0.341176	NA
chr4	11644208	11644209	1	-0.0890071	AC005699,1
chr18	11649890	11649891	1	-0.273923	NA
chr11	11658584	11658585	1	-0.257407	NA
chr5	11681695	11682167	2	-0.254747	CTNND2
chr11	11700722	11700723	1	-0.346154	NA
chr20	11732303	11732304	1	-0.247407	NA
chr6	11756222	11756223	1	-0.337719	ADTRP
chr10	11845080	11845081	1	-0.379679	PROSER2
chr6	11850093	11850094	1	-0.352941	NA
chr2	11850260	11850261	1	-0.5	MIR3681HG
chr19	11915890	11915891	1	-0.284783	NA
chr4	11938859	11938860	1	-0.294643	NA
chr18	11968759	11968760	1	-0.311111	NA
chr4	12028363	12028364	1	-0.201301	NA
chr5	12038149	12038150	1	-0.214493	NA
chr20	12156411	12156412	1	-0.333333	NA
chr6	12163711	12163712	1	-0.277778	HIVEP1
chr4	12234720	12234869	1	-0.116546	LINC02270
chr4	12282415	12282416	1	-0.228571	NA
chr11	12294095	12294114	1	-0.240854	MICAL2
chr4	12380401	12380402	1	-0.324415	NA
chr8	12381108	12381109	1	-0.563025	FAM66A
chr4	12484744	12484745	1	-0.0948908	NA
chr17	12508548	12508549	1	-0.333333	NA
chr16	12524073	12524074	1	-0.311966	SNX29
chr4	12584183	12584184	1	-0.14823	NA
chr4	12589614	12589615	1	-0.221501	NA
chr10	12615012	12615013	1	-0.32931	CAMK1D
chr16	12621062	12621063	1	-0.407407	NA
chr16	12686027	12686028	1	0.428571	CPPED1
chr16	12742889	12742890	1	0.289969	CPPED1
chr17	12763230	12763231	1	-0.5	AC005358,1
chr17	12763230	12763231	1	-0.5	MYOCD
chr11	12763796	12763825	1	-0.277526	TEAD1
chr20	12775198	12775249	1	0.114311	NA
chr11	12820244	12820245	1	-0.328571	TEAD1
chr18	12884840	12884885	2	0.261278	PTPN2
chr17	12886678	12886679	1	-0.0926101	ARHGAP44
chr11	12997388	12997389	1	-0.35	NA
chr19	13060872	13060873	1	0.315789	NFIX
chr19	13067115	13067116	1	0.338462	NFIX
chr12	13100864	13101149	1	0.0970696	FAM234B
chr12	13100864	13101149	1	0.0970696	GSG1
chr11	13137327	13137328	1	-0.296296	NA
chr11	13146589	13146590	1	-0.353535	NA
chr10	13170537	13170538	1	-0.298942	MCM10
chr16	13269276	13269281	1	-0.274671	U91319,1
chr18	13288621	13288714	1	-0.15679	LDLRAD4
chr8	13301922	13301923	1	-0.277778	DLC1
chr17	13429511	13429512	1	-0.257407	NA
chr12	13496813	13497122	1	-0.142956	GRIN2B
chr12	13523889	13524454	1	-0.0963502	GRIN2B
chr20	13609995	13609996	1	0.171731	TASP1
chr10	13659521	13659522	1	0.444444	AL157392,3
chr10	13659521	13659522	1	0.444444	FRMD4A
chr6	13668267	13668268	1	-0.155612	RANBP9
chr17	13670512	13670642	1	-0.15737	NA
chr2	13676779	13676780	1	-0.326599	NA
chr4	13686697	13686721	1	0.108149	LINC01182
chr2	13691262	13691264	1	-0.269737	NA
chr17	13692815	13692816	1	-0.244186	NA
chr17	13694683	13694684	1	-0.121337	NA
chr16	13705312	13705371	1	-0.0865426	NA
chr4	13748356	13748366	1	-0.276471	LINC01182
chr16	13776232	13776233	1	-0.225532	U95743,1
chr17	13823711	13823722	1	-0.393665	COX10-AS1
chr17	13827173	13827174	1	-0.298077	COX10-AS1
chr18	13832584	13832585	1	-0.333333	NA
chr10	13877944	13877945	1	-0.352227	FRMD4A
chr4	13935777	13935861	1	-0.199134	LINC01182
chr6	13950167	13950331	1	-0.210526	RNF182
chr10	13966727	13966728	1	-0.419355	FRMD4A
chr17	13969528	13969529	1	0.223827	COX10-AS1
chr16	13970303	13970304	1	-0.433333	NA
chr8	14053238	14053239	1	-0.199394	NA
chr17	14065867	14065868	1	-0.233212	COX10-AS1
chr8	14070019	14070058	1	-0.0916617	NA
chr10	14102161	14102162	1	-0.367424	FRMD4A
chr10	14125554	14125555	1	-0.332512	FRMD4A
chr10	14177754	14177755	1	-0.336898	FRMD4A
chr19	14272187	14272188	1	-0.388889	AC011509,2
chr20	14286754	14286755	1	-0.193051	MACROD2
chr6	14326587	14326588	1	-0.295455	NA
chr4	14417169	14417170	1	-0.313131	AC006296,3
chr2	14430850	14430851	1	-0.314815	NA
chr11	14437272	14437273	1	0.147542	NA
chr18	14451947	14451948	1	-0.114094	NA
chr20	14533901	14533902	1	-0.228674	MACROD2
chr8	14587436	14587437	1	-0.207112	SGCZ
chr17	14654828	14654829	1	0.104906	NA
chr8	14655968	14656089	1	-0.138433	SGCZ
chr17	14762112	14762113	1	-0.185155	NA
chr6	14770130	14770131	1	-0.390909	AL138720,1
chr21	14825741	14826587	1	-0.105542	AF127577,4
chr21	14825741	14826587	1	-0.105542	LINC02246
chr4	14827553	14827554	1	-0.352941	LINC00504
chr18	14842530	14842531	1	0.39011	ANKRD30B
chr18	14875350	14875351	1	-0.412088	NA
chr20	14880974	14880975	1	-0.470588	MACROD2
chr2	14913394	14913395	1	-0.216802	AC068286,2
chr19	14920105	14920106	1	-0.388889	NA
chr4	14928572	14928573	1	-0.333333	CPEB2-DT
chr20	14937915	14937916	1	-0.108769	MACROD2
chr18	14980998	14980999	1	-0.255556	NA
chr18	14987870	14987871	1	-0.245442	NA
chr11	15082912	15082913	1	-0.351449	NA
chr10	15084514	15084562	1	0.0975057	ACBD7
chr21	15093387	15093664	1	-0.142191	NA
chr6	15118629	15118630	1	-0.281667	NA
chr18	15133618	15133619	1	-0.299342	NA
chr18	15207727	15207729	1	-0.0915989	NA
chr2	15234707	15234708	1	-0.361905	NBAS
chr11	15257799	15257800	1	-0.284615	NA
chr10	15269199	15269200	1	-0.290043	FAM171A1
chr2	15297584	15297585	1	-0.356129	NBAS
chr8	15355062	15355063	1	-0.283077	NA
chr6	15362726	15362727	1	-0.225	JARID2
chr20	15363630	15363631	1	0.3125	MACROD2
chr18	15389339	15389426	1	0.143009	NA
chr11	15398596	15398597	1	-0.184051	NA
chr11	15451618	15451619	1	-0.303571	NA
chr8	15503720	15503721	1	-0.285326	TUSC3
chr21	15553621	15554906	1	-0.187801	AJ009632,2
chr17	15618682	15618683	1	0.457778	AC005324,3
chr17	15618682	15618683	1	0.457778	CDRT1
chr11	15620986	15621165	1	-0.185579	AC073172,1
chr11	15620986	15621165	1	-0.185579	AC087379,2
chr20	15672387	15672388	1	-0.277778	MACROD2
chr20	15718278	15718452	1	-0.246684	MACROD2
chr11	15727068	15727069	1	-0.333333	AC087379,1
chr2	15753766	15753767	1	-0.423077	NA
chr4	15768700	15768719	1	-0.298718	NA
chr6	15837548	15837549	1	-0.308081	NA
chr17	15851613	15851614	1	-0.351648	SPECC1P1
chr11	15861505	15861506	1	-0.209402	NA
chr20	15886513	15886514	1	-0.284585	MACROD2
chr4	15888571	15888746	1	0.153061	NA
chr6	15947232	15947233	1	-0.266204	NA
chr4	15967510	15967511	1	-0.301449	FGFBP2
chr4	15967510	15967511	1	-0.301449	PROM1
chr10	15975098	15975099	1	-0.357143	NA
chr4	16145742	16145743	1	-0.36875	NA
chr4	16168542	16168543	1	-0.274047	TAPT1
chr8	16200397	16200487	1	-0.294118	MSR1
chr6	16228816	16229203	3	-0.0874358	NA
chr10	16257070	16257071	1	-0.28022	NA
chr19	16266372	16266571	1	-0.212531	NA
chr16	16295715	16295716	1	-0.26146	NA
chr5	16365616	16365944	1	-0.166211	NA
chr11	16374509	16374511	1	-0.182055	SOX6
chr22	16415260	16415261	1	0.298246	NA
chr22	16439693	16439694	1	-0.210402	SLC9B1P4
chr11	16446457	16446625	2	-0.120723	SOX6
chr2	16455064	16455065	1	-0.323529	NA
chr4	16456647	16456648	1	-0.358333	AC097515,1
chr11	16505419	16505420	1	-0.225108	SOX6
chr11	16538139	16538140	1	-0.243158	SOX6
chr4	16670000	16670136	1	-0.225	LDB2
chr22	16697757	16697758	1	-0.328571	TPTEP1
chr22	16697757	16697758	1	-0.328571	VWFP1
chr19	16715411	16715412	1	-0.333333	NA
chr17	16746580	16746834	1	0.117599	AC098850,3
chr17	16746580	16746834	1	0.117599	CCDC144A
chr17	16746580	16746834	1	0.117599	UPF3AP1
chr17	16815460	16815461	1	-0.333333	AC098850,4
chr8	16829111	16829112	1	-0.322344	AC011586,2
chr11	16864734	16864735	1	-0.295238	PLEKHA7
chr16	16892826	16892827	1	-0.277778	NA
chr11	16905791	16905792	1	0.45	PLEKHA7
chr17	16958530	16958531	1	-0.114796	TNFRSF13B
chr8	16978493	16978494	1	-0.146214	NA
chr6	17073749	17073750	1	-0.378947	NA
chr20	17078624	17078625	1	-0.263636	NA
chr17	17106924	17106925	1	-0.28	MPRIP
chr2	17135442	17135443	1	-0.0949	NA
chr4	17143515	17143516	1	-0.28655	NA
chr2	17161343	17161344	1	-0.460317	NA
chr17	17182090	17182214	1	0.254849	AC055811,1
chr17	17182090	17182214	1	0.254849	AC055811,4
chr17	17182090	17182214	1	0.254849	MPRIP
chr20	17274285	17274286	1	-0.316667	PCSK2
chr17	17365868	17365982	1	-0.194014	NA
chr11	17397677	17397693	1	-0.392857	ABCC8
chr2	17410304	17410305	1	-0.268763	NA
chr11	17452989	17452990	1	-0.323671	ABCC8
chr2	17454046	17454047	1	-0.373016	NA
chr19	17503880	17503881	1	-0.297619	AC010618,3
chr19	17503880	17503881	1	-0.297619	SLC27A1
chr11	17527965	17527966	1	-0.277778	USH1C
chr11	17628478	17628479	1	-0.209211	OTOG
chr11	17650720	17650721	1	-0.395833	NA
chr5	17654369	17656530	1	-0.0855856	AC233724,2
chr5	17654369	17656530	1	-0.0855856	H3Y1
chr17	17683479	17683480	1	0.6	RAI1
chr6	17704853	17705005	1	-0.184586	NUP153
chr8	17773237	17773278	1	-0.161437	MTUS1
chr20	17826192	17826193	1	-0.305921	NA
chr20	17866341	17866342	1	-0.345238	NA
chr6	17937410	17937411	1	0.260417	KIF13A
chr19	17949517	17949518	1	0.31746	NA
chr20	17962678	17962679	1	-0.286275	OVOL2
chr20	17962678	17962679	1	-0.286275	SNX5
chr10	17970219	17970220	1	-0.203194	SLC39A12
chr16	18012987	18012988	1	-0.291498	AC010601,1
chr16	18012987	18012988	1	-0.291498	AC091489,1
chr2	18019943	18019944	1	-0.0887396	KCNS3
chr20	18031241	18031242	1	-0.278571	OVOL2
chr10	18051479	18051480	1	0.20064	NA
chr17	18056698	18056699	1	-0.313397	GID4
chr4	18059140	18059141	1	-0.257206	NA
chr6	18107445	18107446	1	-0.127976	NA
chr17	18172975	18172976	1	-0.368421	AC087164,1
chr17	18172975	18172976	1	-0.368421	MYO15A
chr8	18283502	18283503	1	-0.333333	NA
chr2	18341827	18341868	1	-0.107238	KCNS3
chr2	18343623	18343624	1	-0.202249	KCNS3
chr6	18357286	18357287	1	-0.263636	NA
chr19	18370162	18370187	1	-0.0958165	NA
chr4	18379050	18379051	1	-0.333333	NA
chr5	18409028	18409791	2	-0.28903	NA
chr11	18442038	18442039	1	0.275253	LDHC
chr19	18475207	18475579	2	-0.193701	ELL
chr4	18490666	18490683	1	-0.122109	AC093898,1
chr14	18542494	18542495	1	-0.351047	NA
chr19	18557796	18558369	2	0.266026	AC005253,1
chr19	18557796	18558369	2	0.266026	KXD1
chr13	18639140	18639141	1	-0.153754	NA
chr17	18709336	18709337	1	-0.291667	TRIM16L
chr11	18750021	18750022	1	-0.285714	PTPN5
chr9	18752720	18752721	1	-0.328889	ADAMTSL1
chr8	18854254	18854516	2	0.29888	PSD3
chr11	18864392	18864393	1	0.296371	MRGPRX7P
chr20	18878111	18878112	1	0.177203	NA
chr4	18890542	18890543	1	-0.244253	NA
chr19	18922112	18922113	1	-0.357143	AC002985,1
chr19	18922112	18922113	1	-0.357143	DDX49
chr11	18932723	18932724	1	-0.226817	NA
chr20	18942290	18942291	1	-0.221195	NA
chr10	19007182	19007308	1	-0.304511	NA
chr2	19071687	19071688	1	-0.328261	LINC01376
chr10	19158076	19158077	1	-0.330357	MALRD1
chr2	19165498	19165499	1	-0.266304	LINC01376
chr19	19167828	19167829	1	-0.342657	BORCS8-MEF2B
chr19	19167828	19167829	1	-0.342657	MEF2B
chr13	19178644	19178645	1	0.461905	TUBA3C
chr20	19229660	19229661	1	-0.153153	SLC24A3
chr10	19289272	19289273	1	-0.195614	MALRD1
chr2	19310219	19310220	1	-0.321053	LINC01376
chr13	19326765	19326766	1	-0.109927	ANKRD26P3
chr17	19347860	19347861	1	-0.4	B9D1
chr6	19355041	19355042	1	0.306373	LNC-LBCS
chr13	19384886	19384887	1	-0.466667	PARP4P2
chr4	19399822	19399823	1	-0.150725	LINC02438
chr2	19400115	19400116	1	-0.0814132	NA
chr10	19412471	19412473	1	-0.226667	MALRD1
chr19	19417262	19417263	1	-0.26945	GATAD2A
chr17	19423491	19423553	1	-0.215805	AC004448,2
chr17	19423491	19423553	1	-0.215805	LINC02094
chr14	19471562	19471563	1	-0.328571	NA
chr13	19477892	19477893	1	-0.249554	TPTE2
chr4	19501643	19501644	1	-0.320588	AC024230,1
chr20	19576478	19576479	1	-0.284091	SLC24A3
chr6	19627575	19627576	1	-0.113158	LNC-LBCS
chr20	19676295	19676296	1	0.4	SLC24A3
chr13	19684311	19684312	1	-0.253896	PSPC1
chr4	19693746	19693747	1	-0.275	AC024230,1
chr20	19751109	19751110	1	-0.304029	NA
chr10	19760771	19760772	1	-0.337662	MALRD1
chr20	19762984	19762999	1	-0.330749	RIN2
chr10	19802014	19802015	1	-0.0959821	NA
chr4	19951881	19951882	1	-0.363844	NA
chr19	19972107	19972108	1	-0.199201	NA
chr21	20006022	20006273	1	-0.0865562	NA
chr4	20046810	20046811	1	0.0838704	NA
chr10	20050524	20050578	1	-0.0826409	PLXDC2
chr14	20058886	20058887	1	0.267857	NA
chr14	20098071	20098072	1	-0.120048	NA
chr20	20107825	20107826	1	-0.309524	CFAP61
chr11	20136380	20136381	1	-0.298942	NA
chr10	20158195	20158311	2	-0.279758	PLXDC2
chr16	20171330	20171331	1	-0.342432	NA
chr8	20195127	20195128	1	-0.183183	NA
chr16	20241720	20241721	1	0.370588	NA
chr4	20253721	20253750	2	0.269171	SLIT2
chr8	20293855	20293856	1	-0.175064	LZTS1
chr12	20316862	20316863	1	-0.369048	NA
chr13	20322511	20322515	1	-0.312655	NA
chr16	20381266	20381267	1	-0.333333	PDILT
chr21	20383666	20383898	1	0.0949507	NA
chr20	20397779	20397780	1	-0.384615	RALGAPA2
chr16	20414412	20414413	1	-0.228702	ACSM5
chr6	20414568	20414569	1	-0.278034	E2F3
chr14	20427633	20427643	1	0.239953	KLHL33
chr17	20472108	20472109	1	-0.333333	NA
chr2	20487389	20487390	1	-0.314286	NA
chr4	20504341	20504342	1	-0.345882	SLIT2
chr2	20508118	20508119	1	-0.333333	NA
chr10	20542788	20542789	1	-0.303571	NA
chr4	20627414	20627415	1	-0.259119	NA
chr2	20654302	20654403	1	0.185185	NA
chr19	20664543	20664591	2	0.281385	NA
chr20	20724732	20724733	1	-0.218365	NA
chr4	20732341	20732342	1	-0.458333	KCNIP4
chr4	20732341	20732342	1	-0.458333	PACRGL
chr4	20734704	20734705	1	-0.218605	KCNIP4
chr4	20734704	20734705	1	-0.218605	PACRGL
chr4	20741538	20741539	1	-0.166044	KCNIP4
chr4	20741538	20741539	1	-0.166044	PACRGL
chr4	20848718	20848719	1	-0.109026	KCNIP4
chr11	20878157	20878158	1	-0.35	NELL1
chr11	20881187	20881188	1	-0.357143	NELL1
chr2	20884157	20884158	1	0.312088	NA
chr4	20886648	20886813	1	-0.124794	KCNIP4
chr16	20990505	20990506	1	-0.272727	DNAH3
chr19	20992283	20992284	1	-0.388889	NA
chr20	21009264	21009272	1	-0.277778	NA
chr14	21026003	21026025	1	0.104984	AL161668,4
chr14	21026003	21026025	1	0.104984	NDRG2
chr14	21026003	21026025	1	0.104984	TPPP2
chr16	21052973	21053108	1	-0.366995	DNAH3
chr14	21057901	21057902	1	0.348485	NDRG2
chr14	21057901	21057902	1	0.348485	RNASE8
chr19	21091873	21091874	1	-0.444444	ZNF714
chr13	21095807	21095808	1	-0.290441	NA
chr18	21131970	21131971	1	-0.333333	NA
chr8	21243175	21243176	1	-0.106906	AC021613,1
chr20	21245498	21245499	1	-0.35	KIZ
chr18	21345638	21345719	1	-0.308081	GREB1L
chr14	21345922	21345923	1	-0.357143	RPGRIP1
chr11	21363017	21363018	1	-0.52381	NELL1
chr4	21363931	21363932	1	-0.289286	KCNIP4
chr2	21419602	21419603	1	-0.294118	AC011752,1
chr2	21419602	21419603	1	-0.294118	AC018742,1
chr8	21434721	21434722	1	-0.171308	NA
chr18	21455273	21455453	1	-0.201131	GREB1L
chr8	21489050	21489051	1	-0.357143	NA
chr8	21580927	21580928	1	-0.308333	NA
chr4	21595293	21595353	1	-0.279931	AC096576,3
chr4	21595293	21595353	1	-0.279931	KCNIP4
chr17	21598257	21598258	1	0.365217	NA
chr22	21614566	21614567	1	-0.333333	UBE2L3
chr8	21684283	21684284	1	-0.316667	NA
chr4	21700367	21700398	1	-0.11598	AC096576,2
chr4	21700367	21700398	1	-0.11598	KCNIP4
chr2	21762487	21762488	1	-0.32906	AC018742,1
chr4	21855691	21855756	1	-0.17402	KCNIP4
chr20	21900893	21900894	1	0.202281	NA
chr11	21934913	21934914	1	-0.294545	ANO5
chr4	21945778	21945779	1	-0.222556	KCNIP4
chr19	22158396	22158397	1	-0.118531	NA
chr19	22238538	22238539	1	-0.391667	NA
chr17	22295352	22295527	1	-0.0851372	NA
chr14	22304485	22304548	2	-0.341735	AC244502,1
chr14	22304485	22304548	2	-0.341735	TRAV39
chr6	22321226	22321227	1	-0.132902	CASC15
chr4	22326754	22326755	1	-0.238095	AC096719,1
chr19	22330856	22330857	1	-0.3	NA
chr4	22336320	22336362	1	0.185026	NA
chr4	22350260	22350276	1	0.127544	ADGRA3
chr6	22352575	22352576	1	-0.292398	CASC15
chr4	22367196	22367197	1	-0.345342	ADGRA3
chr14	22406104	22406105	1	-0.291444	AC244502,1
chr12	22406634	22407499	2	-0.177605	ST8SIA1
chr22	22437664	22437665	1	-0.369231	NA
chr19	22455251	22455252	1	0.122065	ZNF98
chr14	22460002	22460003	1	-0.318182	AC244502,1
chr11	22507466	22507565	1	-0.111771	AC055878,1
chr22	22538382	22538474	1	-0.156132	NA
chr14	22566553	22566554	1	-0.4	DAD1
chr17	22579119	22579120	1	-0.192029	NA
chr19	22611439	22611440	1	-0.375	NA
chr4	22622931	22622932	1	-0.292208	NA
chr18	22678475	22678476	1	-0.366667	NA
chr7	22758216	22758345	1	-0.138821	NA
chr4	22761204	22761205	1	-0.269231	GBA3
chr15	22802119	22802120	1	0.327381	NIPA1
chr13	22837937	22837938	1	0.332168	NA
chr13	22842341	22842342	1	-0.15023	NA
chr16	22849982	22849983	1	-0.333333	HS3ST2
chr16	22886128	22886129	1	0.470085	HS3ST2
chr16	22890756	22890757	1	-0.342857	HS3ST2
chr13	22912183	22912184	1	-0.102366	LINC00621
chr10	22952897	22952898	1	-0.183703	ARMC3
chr15	22965884	22965885	1	-0.318452	CYFIP1
chr18	22984311	22984312	1	0.315789	RBBP8
chr22	22996335	22996336	1	-0.189467	AC245054,1
chr12	23001363	23001780	1	-0.192064	AC084816,1
chr13	23028852	23028853	1	0.416667	NA
chr2	23050501	23050502	1	0.294444	AC018467,1
chr20	23080613	23080695	1	-0.233913	CD93
chr2	23110304	23110305	1	-0.307588	AC018467,1
chr2	23127609	23127610	1	0.333333	AC018467,1
chr19	23138425	23138426	1	-0.321212	ZNF730
chr2	23158574	23158575	1	0.402778	AC018467,1
chr22	23193563	23193564	1	0.315789	BCR
chr16	23265578	23265579	1	0.327059	NA
chr6	23297583	23297584	1	-0.434783	NA
chr18	23330604	23330680	1	-0.233672	TMEM241
chr4	23361348	23361349	1	-0.44	NA
chr20	23407965	23407966	1	-0.297348	NAPB
chr18	23423063	23423089	1	0.212637	TMEM241
chr11	23433990	23434122	2	-0.174962	NA
chr8	23460806	23460909	1	-0.134687	AC104561,1
chr11	23491810	23491811	1	-0.332168	NA
chr6	23507840	23507841	1	-0.332767	NA
chr20	23510394	23510395	1	-0.387255	AL109954,2
chr22	23519913	23519914	1	-0.307692	NA
chr2	23546834	23546835	1	-0.361905	KLHL29
chr19	23564505	23564506	1	-0.27381	ZNF675
chr6	23582744	23582745	1	-0.325758	NA
chr4	23622647	23622648	1	-0.222747	AC093607,1
chr6	23649266	23649267	1	-0.26079	NA
chr11	23754642	23754644	1	-0.0967415	LINC02726
chr20	23757045	23757046	1	0.409357	NA
chr4	23772345	23772346	1	-0.244444	PPARGC1A
chr10	23854225	23854226	1	-0.185185	KIAA1217
chr10	23856670	23856671	1	-0.315217	KIAA1217
chr6	23868498	23868499	1	-0.0943082	NA
chr8	23886674	23886675	1	-0.254831	NA
chr22	23906271	23906272	1	-0.330065	AP000350,6
chr8	23947914	23947915	1	-0.124582	NA
chr8	23957350	23957351	1	-0.342424	NA
chr19	23974082	23974083	1	-0.10503	NA
chr10	23976067	23976068	1	-0.325	KIAA1217
chr13	23985280	23985281	1	-0.388889	AL359736,1
chr13	23985280	23985281	1	-0.388889	AL445985,1
chr13	23985280	23985281	1	-0.388889	SPATA13
chr20	23994697	23994698	1	-0.422222	NA
chr6	24008393	24008394	1	-0.384615	NA
chr2	24009691	24009692	1	0.435897	NA
chr11	24154953	24154954	1	-0.339744	NA
chr14	24155206	24155287	1	-0.252308	AL136295,5
chr14	24155206	24155287	1	-0.252308	RNF31
chr2	24157594	24157596	1	-0.245238	AC008073,3
chr2	24157594	24157596	1	-0.245238	FAM228B
chr22	24165657	24165671	1	-0.294118	CABIN1
chr19	24191440	24191441	1	-0.416667	NA
chr20	24222911	24222912	1	-0.289474	LINC01721
chr19	24242160	24242161	1	-0.303922	NA
chr16	24277300	24277301	1	-0.307971	CACNG3
chr20	24297493	24297494	1	-0.291667	NA
chr4	24328953	24328954	1	0.311688	NA
chr20	24338066	24338067	1	-0.316667	NA
chr11	24354551	24354552	1	-0.152511	NA
chr11	24355296	24355297	1	-0.282991	NA
chr18	24427397	24427398	1	0.363636	IMPACT
chr4	24433935	24433936	1	-0.331169	NA
chr14	24529251	24529252	1	-0.150973	NA
chr21	24535308	24535805	1	-0.129006	LINC01684
chr6	24543018	24543019	1	-0.257143	NA
chr20	24607759	24607760	1	-0.35	SYNDIG1
chr20	24622134	24622135	1	-0.118207	SYNDIG1
chr20	24629149	24629150	1	-0.222222	SYNDIG1
chr14	24647517	24647518	1	0.149573	AL136018,1
chr10	24709872	24709873	1	0.295314	ARHGAP21
chr20	24713942	24714005	1	-0.0903752	NA
chr4	24735670	24735671	1	-0.388889	NA
chr10	24736336	24736337	1	-0.16944	NA
chr22	24754742	24754743	1	-0.375758	PIWIL3
chr11	24757587	24757588	1	-0.0824107	LUZP2
chr8	24815095	24815096	1	-0.279487	AC120193,1
chr13	24834643	24834644	1	0.371429	RNF17
chr20	24834729	24834730	1	-0.285714	NA
chr18	24836247	24836249	1	-0.298077	AC018697,1
chr11	24883238	24883248	1	-0.0980266	LUZP2
chr14	24886330	24886332	1	-0.24186	STXBP6
chr6	24887665	24887666	1	0.336538	RIPOR2
chr5	24934221	24935534	1	-0.0801298	NA
chr4	24974496	24974497	1	0.30819	CCDC149
chr16	24986405	24986427	1	-0.133333	ARHGAP17
chr8	25013094	25013224	2	-0.20378	NA
chr11	25030858	25030859	1	0.169727	LUZP2
chr13	25043546	25043547	1	-0.416667	NA
chr4	25057413	25057414	1	-0.282353	NA
chr11	25061973	25061974	1	-0.173295	LUZP2
chr11	25078526	25078527	1	-0.130801	LUZP2
chr20	25131645	25131646	1	-0.371429	NA
chr20	25140749	25140750	1	-0.333333	AL035252,3
chr20	25163382	25163383	1	-0.374396	NA
chr14	25182709	25182710	1	-0.343529	NA
chr8	25214804	25214837	1	-0.248467	DOCK5
chr22	25231727	25231728	1	-0.384615	CRYBB2
chr10	25231980	25231981	1	-0.244444	GPR158
chr14	25282079	25282080	1	-0.375	NA
chr6	25289203	25289204	1	-0.25	CARMIL1
chr6	25289203	25289204	1	-0.25	CMAHP
chr18	25293283	25293284	1	-0.225507	ZNF521
chr11	25302405	25302712	1	-0.0823742	NA
chr14	25308941	25309006	1	-0.327899	NA
chr6	25379046	25379047	1	-0.363636	CARMIL1
chr6	25379046	25379047	1	-0.363636	CMAHP
chr18	25448212	25448213	1	-0.258333	NA
chr13	25469574	25469575	1	0.370588	ATP8A2
chr14	25490825	25490826	1	-0.308081	NA
chr11	25491030	25491031	1	-0.340461	NA
chr21	25491462	25492079	1	-0.120301	NA
chr13	25501292	25501337	1	-0.241973	ATP8A2
chr10	25520708	25520892	1	-0.149184	GPR158
chr6	25608430	25608431	1	-0.294118	CARMIL1
chr20	25658236	25658237	1	-0.375	ZNF337-AS1
chr10	25660239	25660240	1	-0.142492	LINC00836
chr22	25669190	25669191	1	-0.325792	GRK3
chr14	25689449	25689450	1	-0.100861	LINC02306
chr11	25738185	25738186	1	-0.109396	LINC02699
chr8	25739868	25739869	1	-0.17006	NA
chr22	25742901	25742902	1	0.307692	MYO18B
chr22	25760211	25760212	1	-0.3	MYO18B
chr18	25771904	25771941	1	0.113733	NA
chr2	25788578	25788693	1	-0.0950419	ASXL2
chr18	25836869	25836959	1	-0.190655	NA
chr13	25887091	25887092	1	-0.225	ATP8A2
chr11	25893135	25893136	1	0.359532	NA
chr22	25903729	25903772	1	-0.298319	MYO18B
chr10	26002861	26002862	1	-0.266428	MYO3A
chr8	26032676	26032677	1	-0.34902	EBF2
chr14	26060416	26060417	1	-0.291667	LINC02306
chr6	26080141	26080142	1	-0.314286	NA
chr13	26091927	26091928	1	-0.174016	NA
chr18	26134121	26134318	1	-0.210101	PSMA8
chr11	26136566	26136567	1	-0.217525	NA
chr4	26167432	26167433	1	-0.227011	RBPJ
chr14	26242541	26242601	1	-0.201515	NA
chr22	26313701	26313881	1	-0.0912162	SEZ6L
chr10	26420832	26420833	1	0.277641	NA
chr6	26434268	26434269	1	-0.4	NA
chr6	26562257	26562258	1	-0.183721	NA
chr2	26577299	26577300	1	-0.296053	FAM166C
chr1	26621970	26621971	1	0.292279	NA
chr6	26623767	26623768	1	0.11217	NA
chr11	26669402	26669403	1	-0.138459	SLC5A12
chr14	26681688	26681755	1	-0.0821091	AL110292,1
chr14	26681688	26681755	1	-0.0821091	LINC02588
chr14	26696222	26696255	1	-0.160854	AL110292,1
chr14	26696222	26696255	1	-0.160854	LINC02588
chr22	26719079	26719080	1	-0.277778	MIATNB
chr16	26724140	26724141	1	-0.369048	AC009035,1
chr2	26730001	26730002	1	-0.341667	KCNK3
chr8	26738720	26738747	1	-0.116819	NA
chr18	26868901	26868903	1	-0.256917	AQP4-AS1
chr18	26891885	26891886	1	-0.205077	AQP4-AS1
chr11	26904974	26904975	1	-0.27479	NA
chr22	26905499	26905515	1	0.0829582	LINC01422
chr22	26905499	26905515	1	0.0829582	Z97353,2
chr11	26927106	26927107	1	-0.0973355	NA
chr6	26930811	26930812	1	-0.309783	GUSBP2
chr13	26962924	26962925	1	-0.371517	NA
chr13	26969093	26969094	1	0.291667	AL160035,1
chr13	26979510	26979511	1	-0.352941	AL160035,1
chr16	27030418	27030419	1	-0.471429	NA
chr1	27032416	27032499	1	-0.218917	NA
chr22	27038273	27038274	1	-0.416667	NA
chr4	27041821	27041822	1	-0.388889	NA
chr11	27045707	27045708	1	-0.326797	BBOX1
chr21	27065109	27065315	1	0.0864516	NA
chr14	27066481	27066482	1	0.145982	AL110292,1
chr22	27143033	27143034	1	-0.35119	NA
chr4	27173126	27173127	1	-0.32381	NA
chr14	27218740	27218741	1	-0.337662	AL110292,1
chr18	27255274	27255275	1	-0.246452	NA
chr18	27268044	27268074	1	-0.233278	NA
chr19	27299423	27299425	1	-0.220846	NA
chr18	27300411	27300412	1	-0.194542	NA
chr6	27330050	27330051	1	-0.135101	NA
chr6	27360409	27360479	1	-0.105871	NA
chr16	27388328	27388329	1	0.334225	NA
chr18	27393061	27393062	1	-0.271304	AC068408,1
chr18	27393061	27393062	1	-0.271304	AC090403,1
chr4	27403721	27403723	1	-0.308442	NA
chr18	27430433	27430434	1	-0.109002	AC090403,1
chr22	27453522	27453662	1	0.260776	NA
chr8	27514719	27514720	1	-0.428571	EPHX2
chr19	27515679	27515680	1	-0.309091	NA
chr19	27521291	27521292	1	-0.4	NA
chr5	27573749	27574112	1	0.126206	NA
chr22	27578365	27578366	1	-0.315341	NA
chr14	27592109	27592110	1	-0.303167	AL390334,1
chr22	27596279	27596280	1	-0.343249	NA
chr8	27632737	27632738	1	-0.296667	NA
chr10	27640233	27640234	1	-0.199092	NA
chr6	27684443	27684448	1	0.32	NA
chr22	27698645	27699031	2	-0.261496	AL121885,2
chr2	27730084	27730085	1	-0.333333	NA
chr10	27779649	27779650	1	-0.204013	ARMC4
chr16	27827999	27828020	1	0.112465	GSG1L
chr8	27840123	27840124	1	-0.344737	AC104997,1
chr4	27857179	27857180	1	-0.110994	NA
chr4	27880099	27880100	1	-0.302941	NA
chr13	27898512	27898513	1	-0.135409	PLUT
chr17	27933660	27933661	1	-0.325758	LINC01992
chr17	27978558	27978559	1	-0.317136	LINC01992
chr2	27983402	27983403	1	-0.169405	BABAM2
chr2	27983402	27983403	1	-0.169405	MRPL33
chr16	28049860	28049861	1	-0.368421	GSG1L
chr22	28189967	28189968	1	-0.211022	TTC28
chr14	28243195	28243196	1	-0.315789	NA
chr21	28263494	28263760	1	-0.222857	NA
chr4	28290546	28290547	1	-0.301724	NA
chr10	28365454	28365455	1	-0.175552	NA
chr4	28383586	28383769	1	-0.196184	AC093791,1
chr18	28400955	28400956	1	-0.304511	NA
chr14	28406106	28406108	1	-0.133683	AL139023,1
chr2	28409276	28409277	1	-0.333333	FOSL2
chr11	28418286	28418287	1	-0.25	METTL15
chr17	28421424	28421425	1	-0.313283	NA
chr4	28422699	28422700	1	0.169361	NA
chr6	28486390	28486391	1	-0.335714	Z98745,2
chr6	28524440	28524441	1	-0.178416	GPX6
chr18	28530248	28530249	1	-0.21873	NA
chr19	28592468	28592640	1	-0.207684	AC005394,1
chr19	28592468	28592640	1	-0.207684	AC005394,2
chr14	28598300	28598301	1	-0.168592	LINC02300
chr4	28659527	28659528	1	-0.245211	NA
chr14	28661686	28661687	1	-0.376623	NA
chr11	28706004	28706005	1	-0.274322	LINC02742
chr13	28771621	28771622	1	-0.177263	NA
chr2	28773428	28773429	1	-0.324638	PPP1CB
chr22	28808370	28808401	2	-0.261867	Z93930,2
chr18	28860855	28860856	1	-0.27	NA
chr6	28866180	28866181	1	-0.4	NA
chr13	28868841	28868842	1	-0.344828	MTUS2
chr18	28881871	28882008	1	-0.135696	NA
chr18	28902014	28902015	1	-0.123061	NA
chr6	28907593	28907594	1	-0.309524	TRIM27
chr13	28925305	28925307	1	-0.222222	MTUS2
chr14	28957979	28957980	1	0.262315	AL135878,1
chr14	28957979	28957980	1	0.262315	LINC02326
chr14	28957979	28957980	1	0.262315	LINC02327
chr13	28967677	28967678	1	-0.282353	MTUS2
chr13	28974341	28974342	1	-0.307471	MTUS2
chr22	28976472	28976473	1	-0.346154	ZNRF3
chr19	28989947	28989948	1	0.342657	NA
chr18	29029597	29029598	1	-0.149702	NA
chr6	29052096	29052098	1	-0.217349	AL662791,2
chr18	29064105	29064106	1	-0.118816	NA
chr6	29075217	29075219	1	-0.276842	AL662791,2
chr18	29076070	29076071	1	-0.211111	NA
chr13	29081740	29081741	1	-0.366071	MTUS2
chr14	29138302	29138303	1	-0.0888451	AL135878,1
chr19	29163409	29163410	1	0.393939	NA
chr10	29165794	29165795	1	-0.300334	NA
chr17	29289072	29289073	1	-0.242857	NUFIP2
chr10	29291783	29291784	1	-0.357143	LYZL1
chr16	29300881	29300882	1	-0.357143	AC009093,10
chr16	29300881	29300882	1	-0.357143	AC025279,1
chr19	29303209	29303297	1	-0.199024	AC011474,1
chr11	29406792	29406793	1	-0.293506	LINC02755
chr10	29483957	29483958	1	-0.416667	SVIL
chr10	29483957	29483958	1	-0.416667	SVIL-AS1
chr2	29584277	29584278	1	-0.270531	ALK
chr18	29593413	29593414	1	0.133069	NA
chr2	29617714	29617715	1	-0.301708	ALK
chr14	29642519	29642521	1	-0.205466	PRKD1
chr8	29647931	29648007	1	-0.225529	NA
chr4	29667539	29667540	1	-0.411765	NA
chr22	29694847	29694848	1	-0.411765	NF2
chr8	29697703	29697704	1	-0.333333	LINC00589
chr18	29734769	29734770	1	-0.271364	NA
chr16	29741956	29741957	1	0.304348	NA
chr16	29821832	29821833	1	-0.328947	AC120114,4
chr16	29821832	29821833	1	-0.328947	MVP
chr16	29821832	29821833	1	-0.328947	PAGR1
chr11	29837207	29837208	1	-0.354545	AC107973,1
chr11	29837207	29837208	1	-0.354545	LINC02755
chr16	29851184	29851185	1	-0.300366	NA
chr6	29857331	29857686	2	-0.193839	AL645929,3
chr2	29870371	29870372	1	-0.228814	AC106870,3
chr2	29870371	29870372	1	-0.228814	ALK
chr13	29887343	29887587	2	-0.14823	LINC00297
chr11	29896674	29896675	1	-0.296296	LINC02755
chr17	29953418	29953419	1	-0.335404	EFCAB5
chr6	29971766	29971771	1	-0.304622	MICD
chr2	29974019	29974020	1	-0.401316	NA
chr6	29995365	29995366	1	-0.366071	NA
chr22	30036415	30036416	1	0.455072	HORMAD2-AS1
chr6	30047505	30047506	1	-0.455357	ZNRD1ASP
chr10	30049143	30049144	1	0.444444	JCAD
chr22	30062424	30062425	1	0.236842	HORMAD2-AS1
chr16	30100365	30100366	1	0.368984	AC012645,1
chr14	30110218	30110219	1	0.238889	AL133372,2
chr14	30110218	30110219	1	0.238889	PRKD1
chr13	30170054	30170055	1	-0.103312	NA
chr19	30178952	30178953	1	-0.300676	NA
chr2	30229890	30229891	1	-0.305556	NA
chr18	30235648	30235649	1	-0.357143	NA
chr6	30244027	30244028	1	0.137014	HCG17
chr11	30285651	30285652	1	-0.386207	AL358944,1
chr11	30314178	30314179	1	-0.326486	AL358944,1
chr13	30344994	30344995	1	-0.337662	AL356750,1
chr13	30344994	30344995	1	-0.337662	LINC00426
chr11	30417404	30417405	1	-0.26817	MPPED2
chr14	30447054	30447055	1	-0.342105	G2E3-AS1
chr19	30452421	30452422	1	-0.4	ZNF536
chr4	30470778	30470779	1	-0.117498	NA
chr11	30519078	30519079	1	-0.323077	MPPED2
chr10	30524690	30524691	1	0.148239	NA
chr6	30533611	30533923	2	-0.151306	NA
chr11	30551902	30551903	1	-0.249462	MPPED2
chr19	30552862	30552863	1	-0.412698	ZNF536
chr18	30568928	30568929	1	-0.315789	NA
chr2	30577870	30577871	1	-0.159343	LCLAT1
chr13	30657377	30657378	1	0.328205	USPL1
chr6	30805864	30805865	1	-0.259615	LINC00243
chr4	30862181	30862182	1	-0.300439	PCDH7
chr4	30874596	30874598	1	-0.231618	PCDH7
chr6	30914608	30914609	1	-0.3125	AL669830,2
chr6	30914608	30914609	1	-0.3125	VARS2
chr19	30940794	30940796	1	-0.121715	NA
chr4	30958304	30958317	1	-0.16811	PCDH7
chr6	31001227	31001228	1	0.48	NA
chr15	31167939	31168095	1	-0.0810913	NA
chr8	31193792	31193793	1	-0.13599	NA
chr4	31234747	31234748	1	-0.286713	NA
chr20	31267537	31267723	1	-0.132231	NA
chr8	31277931	31277932	1	-0.190705	AC068672,2
chr8	31286256	31286257	1	0.409091	AC068672,2
chr2	31319185	31319186	1	0.380342	NA
chr21	31322413	31322778	1	-0.127778	TIAM1
chr16	31329046	31329047	1	-0.359091	ITGAM
chr19	31433116	31433117	1	-0.284585	NA
chr6	31436283	31436284	1	0.291935	AL645933,5
chr8	31439424	31439425	1	-0.345238	NA
chr13	31441285	31441286	1	-0.38141	NA
chr18	31473725	31473789	1	-0.18645	DSG3
chr16	31502580	31502581	1	-0.357143	C16orf58
chr19	31560354	31560355	1	-0.333333	NA
chr2	31574166	31574414	2	-0.377778	SRD5A2
chr16	31583071	31583072	1	-0.217949	NA
chr8	31586857	31586858	1	0.140239	NA
chr2	31607344	31607345	1	-0.105727	NA
chr17	31612356	31612357	1	0.245652	AC007923,4
chr13	31689754	31689755	1	-0.0922499	NA
chr13	31718376	31718377	1	0.103016	NA
chr18	31754755	31754756	1	-0.181743	NA
chr8	31771519	31771520	1	-0.299517	NRG1
chr4	31781955	31781956	1	-0.0888051	NA
chr22	31835696	31835848	1	-0.213406	DEPDC5
chr22	31835696	31835848	1	-0.213406	Z82190,2
chr14	31883349	31883351	1	-0.173913	NA
chr16	31965147	31965149	1	-0.14844	NA
chr13	32000932	32000933	1	0.3625	FRY
chr17	32016364	32016572	1	0.167087	LRRC37B
chr22	32190031	32190032	1	-0.367521	NA
chr18	32201742	32201743	1	-0.27381	GAREM1
chr18	32201742	32201743	1	-0.27381	MEP1B
chr8	32234545	32234546	1	-0.300439	NRG1
chr17	32308550	32308551	1	-0.3	RHBDL3
chr22	32324956	32324957	1	-0.375	NA
chr11	32347699	32347700	1	-0.234839	NA
chr8	32373033	32373054	1	0.227858	NRG1
chr18	32407876	32407877	1	-0.248876	GAREM1
chr11	32435235	32435247	3	0.409091	WT1
chr4	32489214	32489215	1	-0.0987565	NA
chr8	32492053	32492054	1	-0.307018	NRG1
chr11	32503427	32503428	1	-0.151305	NA
chr19	32528319	32528320	1	0.263636	NA
chr17	32550641	32550642	1	-0.365915	MYO1D
chr8	32563564	32563565	1	-0.303529	NRG1
chr17	32564672	32564673	1	-0.375758	MYO1D
chr8	32613170	32613171	1	-0.345	NRG1
chr22	32621847	32621848	1	-0.409091	SYN3
chr18	32655568	32655569	1	-0.311111	AC025887,2
chr10	32669646	32669647	1	-0.115101	CCDC7
chr4	32742189	32742343	1	-0.0876457	AC116611,1
chr6	32796660	32796661	1	-0.333333	NA
chr14	32810398	32810399	1	-0.333333	AKAP6
chr22	32893609	32893610	1	-0.293103	SYN3
chr18	32934645	32934646	1	0.341667	AC090371,2
chr18	32950534	32950541	1	-0.200236	CCDC178
chr8	33021619	33021620	1	-0.28	AC090204,1
chr1	33086706	33087196	1	-0.144283	AZIN2
chr4	33087394	33087395	1	-0.146071	NA
chr20	33087496	33087939	1	-0.222204	BPIFB4
chr14	33088822	33088823	1	-0.35	NPAS3
chr20	33097042	33097786	1	-0.248244	BPIFB4
chr10	33112148	33112149	1	-0.263514	IATPR
chr17	33170553	33170614	1	-0.24359	ASIC2
chr17	33191299	33191301	1	-0.145287	ASIC2
chr17	33220122	33220123	1	-0.31	ASIC2
chr6	33222508	33222509	1	-0.206765	NA
chr14	33225880	33225881	1	-0.233939	NPAS3
chr4	33238631	33238632	1	-0.322129	AC093878,1
chr22	33247853	33247854	1	-0.289003	LARGE1
chr21	33269291	33269403	1	0.32973	AP000295,1
chr21	33269291	33269403	1	0.32973	IL10RB
chr14	33272778	33272779	1	-0.288406	NPAS3
chr14	33313140	33313141	1	-0.283088	NPAS3
chr17	33333310	33333311	1	-0.287179	ASIC2
chr19	33391692	33391693	1	-0.3125	PEPD
chr18	33437013	33437163	1	-0.202797	CCDC178
chr19	33471073	33471074	1	0.391304	PEPD
chr4	33473229	33473230	1	-0.363636	AC079772,1
chr4	33488849	33488850	1	-0.293233	AC079772,1
chr4	33498299	33498300	1	-0.228291	AC079772,1
chr10	33499120	33499280	1	-0.157909	NA
chr22	33505677	33505678	1	-0.411765	LARGE1
chr4	33508082	33508083	1	-0.411765	AC079772,1
chr5	33542963	33543158	1	-0.101389	ADAMTS12
chr8	33554109	33554236	1	0.217143	RNF122
chr11	33572983	33572984	1	-0.192929	KIAA1549L
chr11	33608043	33608044	1	-0.323529	KIAA1549L
chr8	33643409	33643410	1	-0.368984	AF279873,3
chr22	33654692	33654693	1	-0.309474	LARGE1
chr13	33696197	33696199	1	-0.232869	NA
chr17	33742437	33742438	1	-0.345238	ASIC2
chr2	33745835	33745864	1	0.23466	LINC01320
chr2	33752453	33752454	1	0.120191	LINC01320
chr13	33766049	33766050	1	-0.192083	NA
chr22	33788577	33788578	1	-0.228632	LARGE1
chr4	33790394	33790395	1	-0.363636	AC016687,3
chr22	33813080	33813154	1	-0.123577	LARGE1
chr16	33825613	33825766	2	-0.169734	NA
chr10	33855908	33855909	1	-0.134626	NA
chr19	33878469	33878553	1	-0.203609	NA
chr16	33886211	33886212	1	0.483333	NA
chr6	33907274	33907275	1	-0.270677	AL138889,1
chr14	33993441	33993442	1	-0.25	EGLN3
chr18	33995180	33995182	1	-0.0931077	NOL4
chr17	33996364	33996365	1	-0.121136	AC004147,4
chr17	33996364	33996365	1	-0.121136	AC024610,2
chr17	33996364	33996365	1	-0.121136	ASIC2
chr17	34000743	34000744	1	-0.0856674	AC004147,4
chr17	34000743	34000744	1	-0.0856674	AC024610,2
chr17	34000743	34000744	1	-0.0856674	ASIC2
chr8	34012075	34012076	1	0.120558	AF279873,3
chr14	34067773	34067774	1	-0.266667	EGLN3
chr2	34076939	34076940	1	-0.272727	LINC01320
chr2	34085950	34085951	1	0.25037	LINC01320
chr6	34091799	34091800	1	-0.466667	GRM4
chr22	34128622	34128623	1	-0.418301	LINC01643
chr12	34152655	34153222	1	-0.0819964	AC140847,1
chr22	34176681	34176682	1	-0.346154	LINC01643
chr13	34216287	34216288	1	-0.386905	NA
chr2	34267693	34267694	1	-0.0989817	LINC01320
chr18	34298852	34298853	1	-0.308271	NA
chr2	34301614	34301615	1	-0.325077	LINC01320
chr8	34363984	34363985	1	0.150139	NA
chr12	34386310	34386948	1	-0.145768	NA
chr13	34387019	34387020	1	-0.307692	LINC02343
chr2	34410585	34410586	1	0.173882	LINC01320
chr18	34412636	34412637	1	-0.217358	NA
chr22	34415796	34415798	1	-0.283784	NA
chr8	34418602	34418603	1	-0.25	NA
chr11	34442755	34442756	1	0.366667	CAT
chr13	34443508	34443510	1	-0.216717	LINC00457
chr13	34443508	34443510	1	-0.216717	LINC02343
chr2	34459613	34459614	1	-0.293233	LINC01320
chr5	34459744	34460106	1	0.174824	NA
chr10	34466370	34466371	1	-0.368421	PARD3
chr10	34477090	34477091	1	-0.352941	PARD3
chr8	34532151	34532152	1	-0.156627	NA
chr17	34537907	34537908	1	-0.276515	NA
chr22	34561629	34561630	1	-0.333333	NA
chr13	34584740	34584742	1	-0.20028	AL161716,1
chr13	34584740	34584742	1	-0.20028	LINC00457
chr13	34584740	34584742	1	-0.20028	LINC02343
chr17	34648876	34648877	1	-0.327731	NA
chr18	34699604	34699649	1	-0.128136	DTNA
chr22	34700588	34700589	1	-0.428571	NA
chr13	34721397	34721398	1	-0.424149	NA
chr6	34744009	34744010	1	0.230415	NA
chr18	34774384	34774385	1	0.224444	DTNA
chr17	34789637	34789638	1	-0.292208	NA
chr10	34795320	34795321	1	-0.308333	PARD3
chr19	34802126	34802127	1	-0.4	LINC01801
chr17	34807233	34807234	1	-0.357143	NA
chr19	34854111	34854112	1	-0.306159	AC008555,2
chr19	34854111	34854112	1	-0.306159	AC008555,4
chr21	34891218	34891728	2	0.176413	RUNX1
chr19	34937292	34937293	1	-0.361345	ZNF30
chr22	34937891	34937892	1	-0.140557	AL024495,1
chr19	34971107	34971108	1	-0.5	NA
chr21	34974348	34974349	1	-0.379487	RUNX1
chr6	34981941	34981942	1	-0.345238	ANKS1A
chr22	34984919	34984920	1	-0.316092	AL024495,1
chr17	35016771	35016772	1	-0.33046	AC004223,3
chr17	35016771	35016772	1	-0.33046	RFFL
chr22	35017530	35017531	1	-0.261905	NA
chr6	35048079	35048080	1	0.429293	AL591002,1
chr6	35048079	35048080	1	0.429293	ANKS1A
chr19	35055169	35055170	1	-0.31016	HPN
chr19	35055169	35055170	1	-0.31016	HPN-AS1
chr19	35142257	35142258	1	0.375	AC020907,2
chr19	35142257	35142258	1	0.375	FXYD1
chr19	35142257	35142258	1	0.375	LGI4
chr4	35164687	35164785	1	-0.164752	NA
chr2	35169365	35169366	1	0.331731	AC012593,1
chr22	35187913	35187914	1	-0.125229	LINC01399
chr6	35263769	35263770	1	-0.298246	ZNF76
chr2	35271731	35271732	1	-0.315789	AC013442,2
chr2	35298335	35298336	1	-0.270657	NA
chr14	35332597	35332598	1	0.282828	NA
chr8	35382491	35382492	1	-0.3125	UNC5D
chr18	35494538	35494539	1	0.357143	AC007998,2
chr18	35494538	35494539	1	0.357143	INO80C
chr4	35503930	35504000	1	-0.120799	NA
chr2	35511835	35511836	1	0.445455	NA
chr4	35558123	35558124	1	0.17087	NA
chr21	35621636	35621694	1	-0.20751	RUNX1
chr17	35635147	35635148	1	-0.343434	AP2B1
chr11	35649944	35649945	1	0.216279	NA
chr19	35756284	35756456	1	0.244548	HSPB6
chr6	35774530	35774531	1	-0.385417	NA
chr10	35965919	35966052	1	-0.113949	NA
chr6	36012177	36012178	1	-0.386555	SLC26A8
chr10	36070405	36070406	1	-0.466667	NA
chr14	36072997	36072998	1	-0.344444	LINC00609
chr18	36172280	36172281	1	-0.3125	ELP2
chr13	36179010	36179011	1	-0.100834	CCDC169-SOHLH2
chr13	36179010	36179011	1	-0.100834	SOHLH2
chr6	36245974	36245975	1	-0.384615	PNPLA1
chr4	36305535	36305536	1	-0.333333	DTHD1
chr6	36325790	36325791	1	-0.307692	BNIP5
chr2	36382085	36382086	1	-0.371429	CRIM1
chr14	36429364	36429365	1	-0.144466	AL132857,2
chr11	36455487	36455488	1	0.413462	PRR5L
chr8	36546108	36546109	1	-0.291859	AC090809,1
chr5	36557721	36558151	1	0.107245	NA
chr13	36558415	36558416	1	-0.274359	NA
chr22	36591181	36591198	2	-0.317443	CACNG2
chr2	36640225	36640226	1	-0.142047	FEZ2
chr18	36667224	36667225	1	-0.325	FHOD3
chr18	36675701	36675702	1	-0.324405	FHOD3
chr22	36691806	36691934	1	-0.174272	CACNG2
chr22	36736895	36736896	1	-0.321429	NA
chr4	36801700	36801701	1	-0.0862625	NA
chr19	36810128	36810129	1	-0.27619	ZNF790-AS1
chr10	36868632	36868633	1	-0.337662	NA
chr8	36887267	36887269	1	-0.156496	KCNU1
chr22	36896040	36896042	1	-0.207326	NA
chr19	36906399	36906400	1	-0.156769	ZNF345
chr19	36906399	36906400	1	-0.156769	ZNF829
chr4	36925145	36925147	1	-0.247492	NA
chr6	36935948	36936092	1	-0.0877121	NA
chr10	36980371	36980372	1	-0.160643	NA
chr14	37063935	37063936	1	-0.4	SLC25A21
chr10	37076027	37076030	2	-0.375	NA
chr13	37080353	37080354	1	-0.454545	NA
chr8	37116269	37116270	1	0.123762	NA
chr19	37154555	37154556	1	-0.12013	AC012309,1
chr19	37154555	37154556	1	-0.12013	ZNF585A
chr4	37192252	37192253	1	-0.215933	NA
chr8	37259929	37260078	1	-0.235967	NA
chr22	37282789	37282832	1	0.185	CYTH4
chr13	37284209	37284305	1	-0.0812346	NA
chr18	37325578	37325579	1	-0.334783	CELF4
chr2	37411491	37411492	1	-0.277778	NA
chr18	37411877	37411878	1	-0.380342	CELF4
chr18	37421960	37421961	1	-0.333333	CELF4
chr18	37567857	37567864	1	0.333333	AC009899,1
chr2	37625795	37625796	1	-0.366667	AC006369,1
chr14	37723023	37723024	1	-0.198203	TTC6
chr14	37749342	37749343	1	-0.198851	TTC6
chr4	37766956	37766957	1	-0.324638	NA
chr4	37775260	37775261	1	-0.339744	NA
chr4	37781205	37781206	1	-0.409091	NA
chr11	37786741	37786742	1	-0.297744	NA
chr11	37791049	37791050	1	-0.186595	NA
chr11	37796824	37796825	1	-0.347426	NA
chr14	37800694	37800695	1	-0.301754	TTC6
chr13	37803121	37803122	1	-0.0882241	TRPC4
chr17	37831860	37831861	1	-0.315789	YWHAEP7
chr17	37942004	37942005	1	-0.118908	NA
chr11	37945452	37945453	1	0.096593	LINC02760
chr19	37974286	37974287	1	-0.352941	SIPA1L3
chr14	38053332	38053333	1	-0.321212	AL392023,2
chr21	38063512	38063794	1	-0.111285	DSCR4
chr21	38063512	38063794	1	-0.111285	KCNJ6
chr18	38116376	38116377	1	-0.143214	NA
chr11	38128994	38128995	1	-0.085764	NA
chr18	38134134	38134135	1	-0.274725	NA
chr14	38164351	38164352	1	-0.176882	AL392023,2
chr18	38209773	38209940	1	-0.0968334	NA
chr22	38289814	38290004	1	-0.167027	NA
chr10	38293768	38293770	1	-0.257692	AL117339,5
chr10	38293768	38293770	1	-0.257692	AL133217,1
chr2	38417587	38417588	1	-0.285714	LINC02613
chr14	38436547	38436548	1	-0.322353	NA
chr18	38439919	38439920	1	-0.268571	NA
chr8	38459110	38459111	1	-0.285714	FGFR1
chr17	38459821	38459822	1	-0.5	ARHGAP23
chr2	38463688	38463689	1	-0.383117	LINC02613
chr18	38492443	38492444	1	-0.0909946	NA
chr14	38516349	38516350	1	-0.25	NA
chr14	38599701	38599702	1	-0.200308	NA
chr5	38690184	38690745	1	-0.15	OSMR-AS1
chr11	38774508	38774509	1	-0.315686	NA
chr21	38801598	38802367	1	-0.201465	NA
chr20	38840869	38841810	1	-0.14245	PPP1R16B
chr18	38846661	38846662	1	-0.35	NA
chr6	38878287	38878331	1	0.134499	DNAH8
chr11	38931013	38931014	1	-0.21292	NA
chr17	38952946	38952947	1	-0.35	FBXO47
chr2	38970932	38970933	1	-0.34	ARHGEF33
chr22	39078481	39078517	1	-0.244444	APOBEC3G
chr22	39101408	39101409	1	-0.357143	APOBEC3H
chr14	39102210	39102408	2	-0.184454	SEC23A
chr18	39137749	39137750	1	-0.393665	NA
chr18	39146546	39146547	1	-0.319419	NA
chr18	39159047	39159074	1	-0.238095	NA
chr11	39161757	39161786	3	-0.32674	AC021723,1
chr13	39225911	39225912	1	-0.295238	LHFPL6
chr6	39228759	39228760	1	-0.409091	KCNK5
chr17	39238682	39238701	1	0.263158	AC015910,1
chr8	39327184	39327185	1	0.334783	ADAM5
chr6	39371149	39371150	1	0.308081	KIF6
chr14	39383990	39383991	1	-0.261905	MIA2
chr2	39431952	39431953	1	-0.275	MAP4K3
chr13	39436571	39436572	1	-0.265	LHFPL6
chr22	39491142	39491143	1	-0.266667	MGAT3
chr4	39506663	39506672	1	-0.247917	UGDH
chr5	39530333	39531155	1	-0.195513	NA
chr2	39539144	39539145	1	-0.391608	MAP4K3-DT
chr22	39596767	39596768	1	-0.288889	CACNA1I
chr22	39605811	39605812	1	-0.321429	CACNA1I
chr19	39722312	39722314	1	-0.111529	NA
chr6	39855059	39855060	1	-0.461538	DAAM2
chr17	39860479	39860645	2	-0.194145	IKZF3
chr17	40084226	40084227	1	-0.411765	THRA
chr2	40148361	40148514	1	-0.112805	SLC8A1
chr2	40148361	40148514	1	-0.112805	SLC8A1-AS1
chr8	40177722	40177723	1	-0.322222	NA
chr8	40236833	40236834	1	0.188338	NA
chr8	40320311	40320312	1	-0.333333	SIRLNT
chr2	40350975	40350976	1	0.270161	SLC8A1
chr11	40364268	40364269	1	-0.104243	LRRC4C
chr6	40371819	40371820	1	-0.14539	TDRG1
chr11	40372555	40372558	2	-0.464286	LRRC4C
chr18	40441733	40441785	1	-0.0840864	NA
chr18	40445440	40445441	1	-0.170829	NA
chr4	40502514	40502536	1	-0.280303	RBM47
chr14	40505438	40505439	1	-0.352941	NA
chr6	40511393	40511394	1	-0.303529	AL033380,1
chr6	40511393	40511394	1	-0.303529	LRFN2
chr18	40537045	40537046	1	-0.322344	NA
chr14	40566010	40566011	1	-0.321429	NA
chr8	40585045	40585046	1	-0.333333	ZMAT4
chr14	40596731	40596732	1	-0.271978	NA
chr2	40675388	40675389	1	-0.333333	AC007317,1
chr17	40759628	40759629	1	-0.129128	NA
chr6	40766591	40766592	1	0.229268	NA
chr19	40801403	40801408	1	0.339921	AC008537,1
chr19	40801403	40801408	1	0.339921	EGLN2
chr19	40801403	40801408	1	0.339921	RAB4B-EGLN2
chr11	40845989	40845990	1	-0.209486	LRRC4C
chr13	40870115	40870116	1	0.470588	TPTE2P5
chr6	40889263	40889264	1	-0.332237	NA
chr6	40889759	40889760	1	-0.314024	NA
chr14	40904337	40904338	1	-0.231481	AL390800,1
chr6	40925258	40925259	1	-0.353535	NA
chr13	40929764	40929765	1	0.26409	NA
chr17	40949085	40949121	1	-0.196899	AC004231,1
chr14	41016182	41016184	1	-0.256667	LINC02315
chr14	41018477	41018478	1	0.0909725	LINC02315
chr14	41025535	41025536	1	-0.214823	LINC02315
chr17	41052473	41052474	1	-0.31016	NA
chr17	41086500	41086501	1	-0.278161	NA
chr17	41088812	41088813	1	-0.383459	NA
chr6	41100717	41100718	1	-0.280193	AL031778,1
chr6	41145437	41145438	1	0.307692	NA
chr21	41145626	41145817	1	0.11393	LINC00323
chr2	41149270	41149271	1	-0.152311	HNRNPA1P57
chr19	41170847	41170849	1	-0.235556	NA
chr11	41191676	41191677	1	-0.309524	LRRC4C
chr17	41234104	41234105	1	-0.271062	NA
chr17	41466575	41466576	1	0.352941	KRT32
chr14	41472407	41472408	1	-0.0902778	NA
chr6	41495547	41495548	1	-0.575	FOXP4-AS1
chr22	41524632	41524633	1	0.435897	ACO2
chr19	41539554	41539555	1	-0.373737	NA
chr17	41552106	41552107	1	-0.383333	LINC00974
chr2	41585466	41585467	1	-0.171053	NA
chr11	41617495	41617496	1	-0.326613	LINC02741
chr17	41631457	41631458	1	-0.388889	KRT42P
chr18	41642512	41642514	1	-0.130826	NA
chr17	41654251	41654252	1	-0.307692	NA
chr14	41682642	41682643	1	-0.0832323	LRFN5
chr6	41785031	41785032	1	-0.411765	AL365205,1
chr6	41785031	41785032	1	-0.411765	FRS3
chr6	41785031	41785032	1	-0.411765	PRICKLE4
chr18	41823739	41823740	1	-0.293636	NA
chr4	41832376	41832377	1	-0.287037	NA
chr8	41842162	41842192	1	-0.239909	ANK1
chr14	41842300	41842301	1	-0.357955	LRFN5
chr18	41900173	41900174	1	-0.291667	NA
chr4	41902176	41902177	1	-0.177419	AC108210,1
chr22	41934079	41934090	1	0.286869	NA
chr11	41987402	41987515	1	-0.218112	NA
chr11	42071591	42071592	1	-0.284922	LINC02745
chr6	42112842	42112843	1	-0.33631	C6orf132
chr17	42271256	42271257	1	-0.273504	AC099811,1
chr17	42271256	42271257	1	-0.273504	STAT5B
chr5	42275077	42275078	1	-0.329412	NA
chr12	42286637	42287413	1	-0.159933	AC020629,1
chr12	42286637	42287413	1	-0.159933	PPHLN1
chr17	42315714	42315764	2	0.286667	STAT3
chr11	42319461	42319462	1	-0.293981	NA
chr6	42368710	42368711	1	-0.333333	TRERF1
chr18	42373312	42373313	1	-0.310345	LINC00907
chr21	42403972	42405250	1	0.175676	UBASH3A
chr14	42422911	42422912	1	-0.129323	AL442163,1
chr14	42422911	42422912	1	-0.129323	AL450442,1
chr11	42471864	42471865	1	0.331522	NA
chr19	42532943	42532944	1	-0.427778	CEACAM1
chr19	42532943	42532944	1	-0.427778	LIPE-AS1
chr4	42648748	42648749	1	-0.132108	ATP8A1
chr2	42667695	42667696	1	-0.354167	MTA3
chr6	42685832	42685863	1	-0.296443	UBR2
chr10	42687338	42687339	1	-0.276316	LINC01518
chr13	42699989	42700072	1	-0.123308	NA
chr11	42726865	42726866	1	-0.286667	NA
chr13	42765293	42765294	1	-0.333333	NA
chr10	42765328	42765329	1	-0.37276	NA
chr5	42766301	42766302	1	0.274716	CCDC152
chr22	42774476	42774486	1	-0.333333	NA
chr13	42808861	42808862	1	-0.433333	NA
chr8	42813529	42813530	1	-0.368421	NA
chr11	42858147	42858148	1	0.135714	NA
chr10	42864049	42864050	1	-0.230226	NA
chr11	42865441	42865442	1	0.227273	NA
chr22	42882193	42882194	1	-0.266667	PACSIN2
chr17	42884370	42884371	1	-0.375	LINC00671
chr13	42894439	42894440	1	-0.297778	EPSTI1
chr19	42950205	42950206	1	0.490385	CEACAMP7
chr14	42976554	42976556	1	-0.162948	NA
chr11	42996152	42996153	1	-0.290404	NA
chr11	43014363	43014562	1	-0.0944009	NA
chr14	43079360	43079361	1	-0.311688	NA
chr18	43120396	43120398	1	-0.140883	AC100779,1
chr4	43140829	43140830	1	-0.315789	AC111198,1
chr11	43165166	43165167	1	-0.217647	HNRNPKP3
chr13	43172057	43172058	1	-0.428571	NA
chr13	43190925	43190926	1	-0.297619	NA
chr5	43203854	43203855	1	-0.333333	NIM1K
chr2	43209449	43209450	1	-0.401316	NA
chr8	43246752	43246753	1	0.40107	NA
chr5	43364969	43365067	1	-0.203481	NA
chr17	43367155	43367179	1	0.35	LINC00910
chr13	43401991	43401992	1	-0.0812387	ENOX1
chr22	43449631	43449632	1	-0.318182	MPPED1
chr17	43455789	43455790	1	-0.298077	NA
chr22	43471721	43471722	1	-0.370588	MPPED1
chr22	43474697	43474698	1	0.333333	MPPED1
chr13	43503737	43503738	1	-0.14472	ENOX1
chr19	43534386	43534394	1	0.359459	ZNF575
chr10	43542347	43542348	1	-0.307432	NA
chr17	43550561	43550562	1	0.357143	DHX8
chr17	43550561	43550562	1	0.357143	ETV4
chr8	43623370	43623371	1	-0.315152	NA
chr22	43635945	43635946	1	-0.408654	EFCAB6
chr17	43649694	43649695	1	-0.266667	MEOX1
chr19	43692212	43692213	1	-0.358974	AC005622,1
chr13	43697604	43697771	1	-0.291375	ENOX1
chr11	43704070	43704071	1	0.230462	AC068205,2
chr11	43704070	43704071	1	0.230462	HSD17B12
chr18	43779228	43779229	1	-0.157895	NA
chr13	43815868	43815869	1	-0.327731	NA
chr8	43825954	43825955	1	-0.211393	NA
chr19	43861248	43861249	1	-0.164384	NA
chr11	43878551	43878552	1	-0.375	AC087521,2
chr17	43894565	43894566	1	-0.331263	MPP2
chr22	43904163	43904333	1	-0.187971	NA
chr11	43986490	43986491	1	-0.313043	AC087521,3
chr13	44029125	44029126	1	-0.244828	NRAD1
chr19	44041017	44041018	1	-0.255556	AC067968,1
chr10	44044132	44044133	1	-0.316667	NA
chr14	44113641	44113642	1	-0.26875	LINC02307
chr13	44136132	44136133	1	-0.333333	LINC00390
chr13	44136132	44136133	1	-0.333333	SMIM2-AS1
chr4	44173047	44173048	1	-0.466667	NA
chr21	44202070	44205130	1	-0.0934066	AP001057,1
chr21	44202070	44205130	1	-0.0934066	GATD3A
chr2	44239409	44239410	1	-0.16354	AC013717,1
chr2	44239409	44239410	1	-0.16354	PPM1B
chr5	44301042	44301044	1	-0.235102	FGF10
chr2	44317815	44317816	1	-0.166633	AC013717,1
chr2	44317815	44317816	1	-0.166633	PREPL
chr2	44317815	44317816	1	-0.166633	SLC3A1
chr10	44331478	44331479	1	-0.303922	NA
chr10	44344585	44344586	1	-0.278656	NA
chr17	44361662	44361663	1	-0.301449	FAM171A2
chr13	44365983	44365984	1	-0.421053	NA
chr5	44409863	44409864	1	-0.25	FGF10-AS1
chr22	44435174	44435175	1	-0.228571	NA
chr22	44460955	44460956	1	-0.316667	NA
chr11	44469413	44469414	1	-0.305556	AC010768,4
chr10	44488827	44488828	1	-0.28252	NA
chr11	44499110	44499111	1	-0.295259	NA
chr10	44546963	44546964	1	-0.109783	NA
chr11	44549436	44549437	1	-0.292208	NA
chr5	44573370	44573371	1	-0.253561	LINC02224
chr6	44576951	44576952	1	-0.290769	NA
chr22	44586523	44586524	1	0.425641	NA
chr5	44662858	44662859	1	-0.14033	NA
chr5	44697926	44697933	1	-0.16016	NA
chr18	44723584	44723585	1	-0.303571	SETBP1
chr13	44729643	44729644	1	-0.36	NA
chr14	44731904	44731905	1	-0.244283	NA
chr22	44746031	44746041	1	-0.271226	PRR5-ARHGAP8
chr10	44789552	44789601	1	-0.194666	NA
chr14	44830660	44830661	1	-0.332512	NA
chr10	44892238	44892328	1	-0.302682	TMEM72-AS1
chr10	44950128	44950129	1	0.384211	AL353801,1
chr10	44950128	44950129	1	0.384211	TMEM72-AS1
chr4	44953887	44953888	1	-0.300481	NA
chr10	44978343	44978344	1	0.346154	DEPP1
chr10	44978343	44978344	1	0.346154	RASSF4
chr4	44996399	44996400	1	-0.263158	NA
chr21	45023970	45023971	1	-0.15893	NA
chr17	45047300	45047301	1	-0.316667	DCAKD
chr18	45082509	45082510	1	-0.141601	NA
chr4	45122593	45122594	1	-0.433333	NA
chr10	45143856	45143857	1	-0.200535	AL358394,3
chr10	45143856	45143857	1	-0.200535	CUBNP3
chr10	45143856	45143857	1	-0.200535	RSU1P2
chr2	45166806	45166807	1	-0.388889	LINC01121
chr6	45212724	45212725	1	-0.27381	SUPT3H
chr11	45267163	45267164	1	-0.333333	SYT13
chr6	45310278	45310279	1	-0.352941	SUPT3H
chr18	45356948	45356949	1	-0.270833	SLC14A2
chr14	45381119	45381120	1	-0.146552	AL162632,1
chr4	45415341	45415342	1	-0.321739	NA
chr14	45463487	45463488	1	-0.386364	NA
chr18	45474978	45475129	1	-0.107777	SLC14A2
chr18	45474978	45475129	1	-0.107777	SLC14A2-AS1
chr6	45519747	45519748	1	-0.36	RUNX2
chr4	45549467	45549644	1	-0.0890638	NA
chr20	45565276	45565686	1	0.124047	WFDC8
chr11	45616866	45616867	1	-0.298942	NA
chr6	45652181	45652182	1	-0.295977	RUNX2
chr13	45657171	45657172	1	-0.379487	NA
chr5	45673901	45673902	1	-0.325397	HCN1
chr11	45720651	45720652	1	-0.316667	NA
chr5	45737795	45737796	1	-0.338936	NA
chr6	45743254	45743273	1	0.310606	NA
chr17	45745511	45745512	1	-0.363636	LINC02210-CRHR1
chr6	45747803	45747804	1	-0.334448	NA
chr10	45794911	45794912	1	0.155067	NA
chr2	45840208	45840209	1	0.5	PRKCE
chr14	45907869	45907870	1	-0.30094	LINC00871
chr22	45926798	45926799	1	-0.454545	WNT7B
chr19	45953223	45953224	1	0.375	NOVA2
chr5	45954526	45954527	1	0.470588	NA
chr6	45989204	45989205	1	0.464912	CLIC5
chr5	46009907	46009908	1	0.329231	NA
chr5	46059031	46059032	1	-0.244582	NA
chr4	46103125	46103126	1	-0.341897	GABRG1
chr2	46105126	46105127	1	0.203135	PRKCE
chr19	46123172	46123173	1	-0.390909	AC007785,1
chr19	46123172	46123173	1	-0.390909	IGFL3
chr14	46135093	46135094	1	-0.416667	LINC00871
chr14	46138616	46138617	1	-0.140644	LINC00871
chr8	46165586	46165587	1	-0.346591	NA
chr19	46198740	46198741	1	0.707071	IGFL2-AS1
chr2	46212428	46212429	1	-0.243479	NA
chr19	46228964	46228965	1	-0.311688	AC006262,3
chr4	46317973	46317974	1	-0.142985	GABRA2
chr11	46375607	46375608	1	-0.333333	DGKZ
chr20	46486182	46486370	1	0.202254	AL031686,1
chr20	46486182	46486370	1	0.202254	ZNF840P
chr20	46683019	46683314	1	-0.108392	SLC13A3
chr2	46723631	46723632	1	-0.28018	LINC01118
chr2	46723631	46723632	1	-0.28018	SOCS5
chr17	46741380	46741382	1	-0.133766	NSF
chr14	46783663	46783664	1	-0.2275	NA
chr13	46831246	46831247	1	-0.355615	NA
chr13	46842252	46842253	1	-0.234994	HTR2A
chr8	46856950	46856951	1	-0.35	LINC00293
chr11	46927180	46927181	1	-0.3125	AC021573,1
chr4	46940862	46940863	1	-0.286713	GABRA4
chr4	46942943	46942944	1	-0.187931	GABRA4
chr22	46969696	46969697	1	-0.368421	TBC1D22A
chr8	47027339	47027340	1	0.152381	NA
chr14	47071123	47071124	1	-0.333333	MDGA2
chr2	47096028	47096029	1	-0.388406	AC073283,3
chr2	47096028	47096029	1	-0.388406	STPG4
chr22	47131398	47131420	2	0.405526	TBC1D22A
chr6	47133158	47133159	1	-0.28125	NA
chr22	47200261	47200262	1	-0.263158	NA
chr13	47216310	47216311	1	-0.428571	NA
chr6	47237706	47237708	1	-0.141228	TNFRSF21
chr6	47284319	47284320	1	-0.366667	TNFRSF21
chr17	47286299	47286308	1	0.0863095	AC068234,1
chr17	47286299	47286308	1	0.0863095	ITGB3
chr2	47343985	47343986	1	-0.4	EPCAM-DT
chr19	47370372	47370373	1	-0.43609	DHX34
chr13	47385498	47385499	1	-0.3125	NA
chr4	47431668	47431669	1	-0.320635	NA
chr13	47539059	47539060	1	-0.0901921	NA
chr14	47627309	47627310	1	0.416667	MDGA2
chr14	47669632	47669633	1	-0.264706	MDGA2
chr22	47696504	47696505	1	-0.201299	AL117329,1
chr22	47701178	47701179	1	-0.176307	AL117329,1
chr22	47702739	47702740	1	-0.126287	AL117329,1
chr16	47726738	47726739	1	-0.301449	LINC02133
chr17	47728855	47728872	1	-0.165697	NA
chr17	47741909	47742134	2	-0.185196	TBX21
chr2	47752560	47752961	1	-0.134677	MSH6
chr8	47756657	47756659	1	0.118099	NA
chr13	47761031	47761032	1	-0.284091	SUCLA2
chr19	47865292	47865293	1	-0.358056	LINC01595
chr4	47922651	47922652	1	-0.527778	NIPAL1
chr2	47932161	47932193	2	-0.247175	AC092650,1
chr14	47992534	47992535	1	0.132958	NA
chr6	48024392	48024393	1	-0.251613	PTCHD4
chr2	48080561	48080562	1	-0.423077	AC092650,1
chr16	48195408	48195423	1	-0.316038	ABCC11
chr3	48215868	48215869	1	-0.296296	NA
chr8	48253470	48253471	1	-0.318182	NA
chr22	48271495	48271496	1	-0.326797	NA
chr20	48363762	48364752	1	-0.111688	AL121888,1
chr20	48363762	48364752	1	-0.111688	LINC00494
chr11	48380397	48380398	1	-0.357143	NA
chr8	48398110	48398111	1	0.434783	NA
chr22	48423099	48423100	1	-0.333333	NA
chr16	48558697	48558739	1	-0.181617	N4BP1
chr19	48570551	48570552	1	-0.285714	AC008403,3
chr19	48570551	48570552	1	-0.285714	SULT2B1
chr17	48582415	48582438	1	0.240569	HOXB-AS3
chr17	48582415	48582438	1	0.240569	HOXB3
chr22	48621775	48621776	1	-0.466667	TAFA5
chr2	48636063	48636064	1	-0.327273	AC073082,1
chr2	48636063	48636064	1	-0.327273	GTF2A1L
chr2	48636063	48636064	1	-0.327273	STON1-GTF2A1L
chr8	48666139	48666140	1	-0.333333	AC022915,2
chr14	48667065	48667110	1	-0.237589	NA
chr14	48680383	48680384	1	-0.155738	NA
chr8	48789163	48789164	1	-0.409091	NA
chr17	48795542	48795659	1	-0.0879409	TTLL6
chr13	48846990	48846991	1	0.34	NA
chr3	48906327	48906328	1	-0.355556	NA
chr14	48909277	48909278	1	0.128548	NA
chr6	48933642	48933643	1	-0.162344	NA
chr8	48942055	48942056	1	-0.0820292	NA
chr6	48944394	48944395	1	0.25	NA
chr13	48999147	48999148	1	-0.295238	FNDC3A
chr16	49027825	49027826	1	-0.295455	NA
chr14	49070719	49070720	1	-0.327731	AL110505,1
chr16	49099609	49099610	1	-0.174179	AC044798,3
chr13	49193364	49193365	1	-0.245098	FNDC3A
chr17	49211674	49211675	1	-0.346154	ABI3
chr2	49216005	49216006	1	-0.364672	AC009975,1
chr2	49216005	49216006	1	-0.364672	AC009975,2
chr11	49223123	49223251	1	-0.189916	NA
chr2	49249970	49249971	1	-0.246361	AC009975,1
chr2	49249970	49249971	1	-0.246361	AC009975,2
chr6	49257896	49257897	1	-0.318182	NA
chr16	49300382	49300383	1	0.297619	AC007614,1
chr16	49320374	49320375	1	-0.089978	AC007614,1
chr2	49355358	49355359	1	-0.227504	AC009975,1
chr2	49355358	49355359	1	-0.227504	AC009975,2
chr12	49366199	49366496	1	0.212727	NA
chr16	49387306	49387307	1	-0.209724	C16orf78
chr13	49443453	49443456	2	0.468254	CAB39L
chr11	49449549	49449700	1	-0.187273	NA
chr16	49555500	49555501	1	-0.25	ZNF423
chr6	49577644	49577645	1	-0.333333	CYP2AC1P
chr22	49599323	49599324	1	-0.446154	C22orf34
chr2	49603418	49603419	1	-0.31828	NA
chr11	49627263	49627264	1	-0.159259	AC136759,1
chr22	49695851	49695852	1	-0.144036	NA
chr18	49754300	49754545	1	-0.135502	NA
chr22	49820763	49820764	1	-0.390351	BRD1
chr13	49833340	49833503	1	-0.0990761	NA
chr17	49896101	49899507	2	-0.34375	AC027801,2
chr6	49910450	49910452	1	-0.187357	NA
chr16	49988601	49988602	1	-0.346154	NA
chr2	50036729	50036730	1	-0.316667	NRXN1
chr22	50061722	50061730	1	-0.322134	MLC1
chr8	50122407	50122556	1	-0.229953	SNTG1
chr22	50152706	50152707	1	-0.305556	MOV10L1
chr17	50171257	50171258	1	-0.300654	SGCA
chr5	50178799	50178800	1	-0.265583	NA
chr6	50179070	50179071	1	-0.272527	AL138826,1
chr8	50195938	50195939	1	-0.388889	SNTG1
chr17	50202964	50202965	1	-0.352941	AC015909,1
chr3	50225925	50225933	1	0.32	NA
chr5	50295231	50295232	1	0.157043	NA
chr19	50327889	50327920	1	0.196825	KCNC3
chr5	50453030	50453031	1	-0.277734	NA
chr8	50571760	50571761	1	-0.371353	SNTG1
chr6	50619607	50619608	1	-0.0895543	AL135908,1
chr16	50632276	50632277	1	-0.332168	NKD1
chr16	50636858	50636859	1	-0.328947	NKD1
chr6	50644593	50644594	1	-0.204651	NA
chr11	50675390	50675391	1	-0.25	NA
chr3	50683959	50683960	1	-0.361538	DOCK3
chr8	50756587	50756588	1	-0.120321	SNTG1
chr8	50819592	50819593	1	-0.20339	NA
chr8	50839390	50839391	1	-0.22003	NA
chr19	50870193	50870244	2	-0.234124	KLK2
chr8	50944672	50944673	1	-0.297386	NA
chr16	50975160	50975161	1	-0.411765	NA
chr2	50996643	50996644	1	-0.297143	NRXN1
chr8	51004209	51004210	1	-0.0859093	NA
chr10	51012352	51012353	1	-0.31746	PRKG1
chr13	51065306	51065614	2	-0.288043	GUCY1B2
chr2	51100522	51100523	1	-0.324864	AC007402,1
chr2	51100522	51100523	1	-0.324864	NRXN1
chr8	51107925	51108062	1	-0.108751	NA
chr14	51147195	51147196	1	-0.201515	NA
chr14	51160983	51161070	1	-0.173795	NA
chr8	51179372	51179373	1	-0.274194	NA
chr8	51227003	51227004	1	-0.122391	NA
chr13	51244286	51244287	1	-0.316667	FAM124A
chr6	51312189	51312190	1	-0.34	NA
chr17	51347418	51347419	1	-0.284091	LINC02073
chr5	51391886	51391887	1	0.305556	ISL1
chr2	51394842	51394843	1	0.173622	AC007402,1
chr3	51396234	51396235	1	-0.279762	DCAF1
chr3	51396234	51396235	1	-0.279762	RBM15B
chr2	51396793	51396794	1	0.167363	AC007402,1
chr16	51419443	51419444	1	0.352941	AC007344,1
chr16	51419443	51419444	1	0.352941	AC087564,1
chr10	51458483	51458484	1	-0.29021	PRKG1
chr19	51483805	51483836	2	-0.251055	CEACAM18
chr17	51519316	51519317	1	-0.338816	LINC02073
chr20	51531689	51531983	1	-0.175456	NFATC2
chr17	51551146	51551147	1	-0.4	NA
chr20	51563211	51563452	1	0.0924714	NA
chr2	51567615	51567616	1	-0.206222	AC007402,1
chr6	51572850	51572851	1	-0.309524	NA
chr2	51588150	51588151	1	-0.175872	AC007402,1
chr6	51588602	51588603	1	-0.133663	NA
chr2	51601301	51601302	1	-0.272727	AC007402,1
chr16	51634172	51634174	1	-0.16369	HNRNPA1P48
chr17	51668171	51668172	1	-0.5	CA10
chr5	51692841	51692842	1	-0.391304	NA
chr3	51705243	51705244	1	-0.287879	NA
chr2	51723962	51723963	1	0.142432	AC007402,1
chr2	51780810	51780811	1	-0.396761	AC007402,1
chr10	51811469	51811471	1	-0.191268	PRKG1
chr17	51813670	51813671	1	-0.26087	CA10
chr14	51866171	51866287	2	-0.239683	GNG2
chr14	51881728	51881729	1	-0.154902	GNG2
chr2	51887951	51887952	1	-0.27521	AC007402,1
chr6	51893308	51893309	1	-0.375	PKHD1
chr6	51923329	51923330	1	-0.122678	PKHD1
chr13	51928361	51928371	1	-0.273504	NA
chr6	51937697	51937698	1	-0.461538	PKHD1
chr2	51976454	51976456	1	-0.153435	AC007402,1
chr16	51983836	51983837	1	-0.223485	NA
chr17	51988246	51988247	1	-0.124523	CA10
chr5	52015385	52015386	1	-0.268398	LINC02118
chr14	52022612	52022613	1	-0.353535	NID2
chr13	52077248	52077249	1	-0.345351	NEK5
chr16	52147059	52147060	1	-0.277778	NA
chr5	52149884	52149885	1	-0.285403	NA
chr4	52158894	52158895	1	-0.104107	NA
chr6	52164486	52164487	1	-0.276087	NA
chr16	52185284	52185285	1	-0.318681	NA
chr16	52186972	52186973	1	-0.29	NA
chr5	52206920	52206921	1	-0.281853	NA
chr13	52311038	52311039	1	-0.309524	TPTE2P2
chr5	52350551	52350552	1	-0.428571	NA
chr20	52367884	52368314	1	-0.139098	LINC01524
chr4	52396818	52396819	1	-0.101069	AC097522,2
chr6	52408668	52408674	2	-0.357143	EFHC1
chr16	52445442	52445443	1	-0.339744	TOX3
chr8	52445564	52445574	3	-0.343284	ST18
chr5	52448823	52448824	1	-0.269231	NA
chr19	52463364	52463365	1	-0.337719	ZNF578
chr3	52488935	52488936	1	-0.25188	NISCH
chr6	52512367	52512368	1	-0.291667	EFHC1
chr6	52512367	52512368	1	-0.291667	TRAM2
chr10	52580866	52580867	1	-0.310924	LNCAROD
chr10	52624447	52624448	1	-0.201795	LNCAROD
chr5	52630924	52630925	1	-0.304167	NA
chr2	52689032	52689033	1	-0.283476	NA
chr6	52736813	52736814	1	-0.375	NA
chr19	52778722	52778723	1	-0.411765	ZNF600
chr8	52818553	52818554	1	-0.299242	NA
chr5	52842523	52842524	1	-0.261538	ITGA1
chr4	52847285	52847286	1	-0.283333	LINC01618
chr2	52889408	52889409	1	0.6	AC010967,1
chr5	52896583	52896584	1	-0.291444	ITGA1
chr16	52908648	52908649	1	-0.358333	NA
chr8	52921271	52921272	1	-0.108217	NA
chr10	52926459	52926460	1	-0.380952	NA
chr17	52956483	52956484	1	-0.332168	NA
chr10	52972263	52972264	1	-0.3125	NA
chr6	52979246	52979247	1	0.299539	GSTA4
chr5	53060165	53060166	1	-0.280797	ITGA2
chr4	53080487	53080552	1	0.130736	SCFD2
chr5	53126609	53126610	1	-0.307568	AC008966,1
chr4	53140438	53140439	1	-0.347396	SCFD2
chr13	53144362	53144363	1	-0.397241	LINC01065
chr5	53145904	53145905	1	-0.375	NA
chr5	53157055	53157056	1	-0.268939	NA
chr3	53162811	53162812	1	-0.409091	PRKCD
chr14	53191855	53191973	1	-0.0944444	AL365295,1
chr3	53207468	53207469	1	0.321531	NA
chr10	53234320	53234321	1	-0.416667	NA
chr3	53273614	53273615	1	-0.357143	NA
chr17	53333713	53333714	1	-0.248485	AC034268,2
chr8	53361535	53361536	1	-0.201818	NA
chr8	53447347	53447348	1	0.217826	AC022034,3
chr8	53458210	53458211	1	0.221222	AC022034,3
chr4	53473041	53473042	1	0.154734	AC058822,1
chr4	53473041	53473042	1	0.154734	LNX1
chr13	53479238	53479239	1	0.167033	AL356295,1
chr19	53482976	53482977	1	0.25096	ZNF813
chr14	53571718	53571719	1	-0.442424	AL365295,1
chr10	53607591	53607592	1	-0.213825	NA
chr19	53644655	53644656	1	-0.364943	NA
chr1	53650316	53650317	1	-0.334842	GLIS1
chr14	53686649	53686650	1	-0.37037	AL365295,1
chr14	53686649	53686650	1	-0.37037	LINC02331
chr2	53690665	53690713	1	-0.101236	ASB3
chr4	53704998	53705010	1	-0.248252	AC058822,1
chr4	53704998	53705010	1	-0.248252	AC124017,1
chr2	53728714	53728715	1	-0.350461	ASB3
chr10	53759445	53759446	1	-0.109729	NA
chr8	53774663	53774664	1	-0.304348	ATP6V1H
chr6	53775682	53775818	1	-0.123729	AL590652,1
chr14	53828930	53828931	1	0.264815	AL365295,1
chr14	53828930	53828931	1	0.264815	LINC02331
chr8	53829482	53829483	1	-0.308756	ATP6V1H
chr10	53850994	53851138	1	-0.137577	PCDH15
chr17	53852694	53852695	1	-0.3125	AC034268,2
chr6	53907919	53907920	1	-0.22126	LRRC1
chr14	53918431	53918432	1	-0.362573	NA
chr4	53925869	53925946	1	-0.101834	AC058822,1
chr3	53940106	53940107	1	-0.316498	NA
chr13	53993365	53993366	1	-0.270474	NA
chr17	54016086	54016087	1	-0.333333	AC034268,2
chr10	54052889	54052890	1	-0.340351	PCDH15
chr10	54187353	54187354	1	0.138966	PCDH15
chr10	54191880	54191881	1	0.100796	PCDH15
chr14	54201818	54201819	1	-0.409091	NA
chr3	54245703	54245704	1	-0.275862	CACNA2D3
chr1	54254266	54254865	1	0.0981057	SSBP3
chr19	54260149	54260150	1	-0.344444	NA
chr5	54260411	54260412	1	-0.28	ARL15
chr16	54300602	54300603	1	-0.433333	NA
chr4	54304078	54304079	1	-0.105477	NA
chr13	54323487	54323488	1	0.221612	NA
chr2	54343133	54343134	1	-0.235294	C2orf73
chr8	54360080	54360081	1	-0.284091	NA
chr3	54404695	54404696	1	-0.166715	CACNA2D3
chr4	54505073	54505074	1	-0.11491	NA
chr17	54523336	54523337	1	-0.357143	NA
chr13	54547871	54547872	1	-0.0949089	NA
chr13	54601663	54601664	1	-0.281481	AL442636,1
chr8	54607484	54607485	1	-0.276888	RP1
chr5	54608536	54608537	1	-0.255556	NA
chr6	54638530	54638592	1	-0.133333	NA
chr3	54640611	54640612	1	-0.409091	CACNA2D3
chr17	54663890	54663891	1	-0.301449	AC015943,1
chr10	54712982	54712983	1	-0.24714	PCDH15
chr10	54740303	54740304	1	0.127874	PCDH15
chr10	54758855	54758986	1	0.101108	PCDH15
chr10	54803530	54803531	1	-0.404558	PCDH15
chr17	54905998	54906114	1	-0.250474	TOM1L1
chr3	54962923	54962924	1	-0.272727	CACNA2D3
chr3	54962923	54962924	1	-0.272727	LRTM1
chr5	54989300	54989302	1	-0.263602	ESM1
chr16	54999088	54999089	1	-0.378205	NA
chr10	55026981	55026982	1	-0.100852	PCDH15
chr2	55080902	55080903	1	0.165285	RTN4
chr5	55114242	55114271	1	-0.191268	CDC20B
chr4	55116412	55116413	1	0.361345	KDR
chr16	55205223	55205224	1	-0.291667	NA
chr16	55230145	55230146	1	-0.227142	NA
chr8	55305300	55305301	1	-0.28	XKR4
chr10	55337859	55337860	1	-0.132269	AC016822,1
chr10	55337859	55337860	1	-0.132269	PCDH15
chr18	55354906	55355351	2	0.177068	TCF4
chr10	55381817	55381882	1	-0.138304	AC016822,1
chr10	55381817	55381882	1	-0.138304	PCDH15
chr5	55421479	55421480	1	-0.378205	MTREX
chr3	55464620	55464621	1	-0.265413	NA
chr16	55468969	55468970	1	-0.277778	MMP2
chr16	55470328	55470361	1	-0.230576	MMP2
chr13	55474172	55474173	1	-0.116328	NA
chr10	55484885	55484886	1	-0.194617	AC016822,1
[truncated: 2,340 more rows]
