# Supplementary material for: DNA Methylation Signature in Mononuclear Cells and Proinflammatory Cytokines May Define Molecular Subtypes in Sporadic Meniere Disease
Source: Preprints.org preprint supplement (doi:10.20944/preprints202110.0030.v1), 2021-10-01
Supplement: Supplementary file 14 [file Table_S7.xls]

## Sheet: Folha1
chr	start	end	nCpG	methdiff	gene
chr16	39180	39181	1	-0.428571	NA
chr20	193893	193895	1	-0.284729	NA
chr16	264742	264813	1	0.31015	FAM234A
chr8	309817	309818	1	-0.261663	NA
chr6	397778	397779	1	-0.286275	IRF4
chr2	422956	422957	1	-0.388889	AC105393,1
chr16	564771	564772	1	0.333333	PRR35
chr11	676706	676707	1	-0.304029	AC131934,1
chr11	676706	676707	1	-0.304029	DEAF1
chr12	758148	758727	2	-0.128739	WNK1
chr19	869956	869957	1	-0.423077	MED16
chr2	874094	874095	1	0.333333	NA
chr11	876377	876378	1	-0.296992	CHID1
chr20	976133	976134	1	-0.304348	RSPO4
chr4	992106	992107	1	-0.333333	IDUA
chr4	992106	992107	1	-0.333333	SLC26A1
chr2	1070426	1070427	1	-0.319853	SNTG2
chr5	1083627	1085418	1	0.156265	SLC12A7
chr16	1160664	1160665	1	-0.357143	CACNA1H
chr18	1163036	1163037	1	-0.227273	AP000829,1
chr17	1193777	1193931	2	-0.0891347	ABR
chr11	1198401	1198402	1	0.388889	MUC5AC
chr6	1294381	1294382	1	0.17674	NA
chr17	1299958	1299959	1	-0.4	TRARG1
chr11	1453157	1453158	1	-0.266667	BRSK2
chr8	1454946	1454947	1	0.428571	DLGAP2
chr17	1617891	1617892	1	-0.35	SLC43A2
chr10	1778049	1778050	1	-0.287879	NA
chr18	1836233	1836234	1	0.138022	AP005262,2
chr16	1939555	1939556	1	-0.286713	MSRB1
chr20	2044296	2044297	1	-0.35	NA
chr20	2103653	2103654	1	0.285714	STK35
chr8	2127804	2128002	1	0.119278	MYOM2
chr11	2203069	2203070	1	-0.25	NA
chr20	2641375	2641376	1	-0.403509	TMC2
chr4	2763927	2763982	2	0.234213	NA
chr6	2843300	2843301	1	0.328571	NA
chr5	2867093	2867564	1	-0.2	NA
chr10	2947634	2947635	1	-0.248276	NA
chr11	2955878	2955879	1	0.305556	NAP1L4
chr20	2986784	2986819	1	0.280835	PTPRA
chr12	3049751	3050141	1	-0.298214	NA
chr2	3090075	3090076	1	-0.13883	LINC01250
chr4	3469787	3469788	1	-0.315789	DOK7
chr16	3533900	3533901	1	-0.409091	AC004494,2
chr16	3533900	3533901	1	-0.409091	CLUAP1
chr17	3606634	3606635	1	0.434343	AC027796,3
chr17	3606634	3606635	1	0.434343	TRPV1
chr1	3679231	3679232	1	0.192613	TP73
chr10	3806690	3806810	1	-0.185088	NA
chr19	3818833	3818843	1	0.266667	ZFR2
chr16	3914934	3914951	1	-0.274545	NA
chr19	4312076	4312077	1	0.333333	FSD1
chr16	4345943	4345944	1	0.333333	CORO7-PAM16
chr16	4345943	4345944	1	0.333333	PAM16
chr4	4366925	4366926	1	-0.257407	NSG1
chr8	4434075	4434076	1	-0.309942	CSMD1
chr10	4435888	4435889	1	-0.384615	NA
chr4	4459061	4459062	1	0.4	STX18
chr2	4462297	4462299	1	-0.251423	NA
chr17	4488752	4488753	1	-0.294118	NA
chr17	4642095	4642144	1	-0.319048	ALOX15
chr6	4679538	4679539	1	-0.4	NA
chr4	4709123	4709124	1	-0.108413	STX18-AS1
chr19	4762331	4762332	1	-0.36	NA
chr4	4858705	4858706	1	0.333333	NA
chr20	4907023	4907024	1	-0.238095	SLC23A2
chr2	4998160	4998161	1	-0.0823006	NA
chr10	5169109	5169252	1	-0.204615	AKR1C8P
chr4	5403234	5403235	1	-0.26455	STK32B
chr18	5472746	5472747	1	-0.307692	AP005059,2
chr18	5472746	5472747	1	-0.307692	EPB41L3
chr10	5587209	5587372	1	-0.341308	NA
chr16	5601546	5601571	1	-0.34447	LINC01570
chr16	5601546	5601571	1	-0.34447	RBFOX1
chr6	5855221	5855222	1	-0.35	AL136307,1
chr16	5900118	5900119	1	-0.327273	RBFOX1
chr8	6390167	6390168	1	-0.301136	NA
chr17	6487057	6487058	1	0.307692	PITPNM3
chr2	6541445	6541539	1	-0.226923	NA
chr16	6941919	6941920	1	-0.380952	RBFOX1
chr8	6943786	6943787	1	0.303571	NA
chr2	7010524	7010627	1	0.257871	RNF144A
chr5	7023192	7025565	1	-0.131434	LINC02196
chr16	7087255	7087342	1	-0.29067	RBFOX1
chr12	7165009	7165535	2	-0.17436	NA
chr2	7220079	7220080	1	-0.106618	NA
chr19	7221073	7221074	1	-0.363636	INSR
chr11	7429535	7429536	1	-0.353535	AC107884,1
chr11	7429535	7429536	1	-0.353535	SYT9
chr17	7478656	7478657	1	0.435897	ZBTB4
chr20	7515117	7515118	1	-0.34413	NA
chr6	7521315	7521316	1	-0.313187	NA
chr8	7536839	7536840	1	0.625	NA
chr11	7575067	7575110	1	-0.191819	PPFIBP2
chr16	7609657	7609658	1	-0.321429	RBFOX1
chr11	7656656	7656657	1	-0.411765	PPFIBP2
chr17	7798419	7798420	1	-0.397059	DNAH2
chr11	7856945	7856946	1	0.193333	AC044810,2
chr11	7856945	7856946	1	0.193333	AC044810,3
chr6	7923879	7923880	1	-0.261905	BLOC1S5-TXNDC5
chr16	7999996	8000009	2	-0.339286	AC093515,1
chr17	8020533	8020534	1	0.404412	NA
chr11	8072729	8072730	1	-0.342424	TUB
chr18	8180919	8180920	1	-0.363636	PTPRM
chr4	8227683	8227691	1	0.333333	SH3TC1
chr4	8282487	8282488	1	-0.307692	HTRA3
chr19	8384287	8384288	1	-0.333333	RAB11B-AS1
chr17	8438027	8438028	1	-0.411765	NDEL1
chr4	8553018	8553034	1	-0.280423	NA
chr19	8698375	8698376	1	0.416667	ACTL9
chr17	8716224	8716234	1	-0.247401	NA
chr8	8765994	8765995	1	-0.308333	AC087269,1
chr6	8851483	8851484	1	-0.305556	HULC
chr4	8864302	8864303	1	-0.353535	HMX1
chr16	8961147	8961148	1	-0.314286	USP7
chr20	8964158	8964159	1	-0.294118	PLCB1
chr11	9033755	9033762	1	-0.317949	AC079296,1
chr11	9033755	9033762	1	-0.317949	SCUBE2
chr20	9092080	9092264	1	-0.185807	PLCB4
chr21	9340471	9340472	1	0.333333	CR381653,1
chr16	9764547	9764548	1	-0.3125	GRIN2A
chr17	9764862	9764863	1	-0.441558	AC027045,2
chr6	9829708	9829709	1	-0.308333	OFCC1
chr17	9841585	9841586	1	-0.284091	GLP2R
chr4	9944651	9944652	1	-0.454545	SLC2A9
chr5	10032800	10033059	1	-0.147129	NA
chr16	10055761	10055762	1	-0.318182	GRIN2A
chr18	10144207	10144208	1	-0.3125	AP005271,1
chr18	10413561	10413681	1	-0.257079	AP006219,3
chr18	10413561	10413681	1	-0.257079	LINC01254
chr8	10551538	10551539	1	-0.416667	PRSS55
chr4	10622751	10622752	1	0.388889	CLNK
chr8	10630721	10630722	1	0.303406	RP1L1
chr19	10697691	10697692	1	-0.409091	NA
chr4	10785502	10785504	1	-0.156333	NA
chr16	10809469	10809470	1	-0.316667	TVP23A
chr2	10861165	10861166	1	0.361111	LINC01954
chr20	10895576	10895577	1	-0.444444	AL050403,1
chr20	10895576	10895577	1	-0.444444	AL050403,2
chr16	10914065	10914066	1	-0.259868	CIITA
chr8	11039005	11039006	1	-0.525253	XKR6
chr10	11162876	11162877	1	-0.266667	CELF2
chr17	11207718	11207729	1	-0.302144	AC005548,1
chr10	11242585	11242586	1	-0.384615	CELF2
chr16	11254272	11254304	1	-0.255556	RMI2
chr16	11431880	11431881	1	-0.411765	AC099489,1
chr8	11442750	11442751	1	-0.384615	FAM167A
chr20	11528690	11528691	1	-0.0913043	NA
chr6	11634855	11634856	1	-0.256966	NA
chr2	11850260	11850261	1	-0.368421	MIR3681HG
chr20	11926212	11926213	1	-0.407018	BTBD3
chr8	12009776	12009777	1	-0.273657	AC107918,4
chr18	12044244	12044245	1	0.4	NA
chr16	12049613	12049614	1	-0.244444	SNX29
chr4	12075357	12075358	1	-0.309091	NA
chr11	12146267	12146268	1	-0.218182	MICAL2
chr20	12156411	12156412	1	-0.411765	NA
chr11	12242346	12242456	1	0.313525	MICAL2
chr8	12381108	12381109	1	-0.5	FAM66A
chr11	12553115	12553116	1	-0.319853	NA
chr4	12589614	12589615	1	-0.19906	NA
chr10	12615012	12615013	1	-0.307143	CAMK1D
chr16	12621062	12621063	1	-0.421053	NA
chr16	12686027	12686028	1	0.388889	CPPED1
chr17	12763230	12763231	1	-0.411765	AC005358,1
chr17	12763230	12763231	1	-0.411765	MYOCD
chr20	12775198	12775249	1	0.115009	NA
chr11	12820244	12820245	1	-0.309524	TEAD1
chr20	12886359	12886538	1	0.0870968	LINC01722
chr11	12997388	12997389	1	-0.347826	NA
chr10	13170537	13170538	1	-0.298942	MCM10
chr16	13269276	13269281	1	-0.28125	U91319,1
chr21	13284426	13284819	1	-0.120536	NA
chr8	13301922	13301923	1	-0.294444	DLC1
chr19	13471899	13471900	1	-0.4	CACNA1A
chr6	13487023	13487037	2	-0.307692	GFOD1
chr12	13523889	13524454	1	-0.116476	GRIN2B
chr2	13691262	13691264	1	-0.283626	NA
chr17	13827173	13827174	1	-0.360577	COX10-AS1
chr6	13950167	13950331	1	-0.205857	RNF182
chr10	13966727	13966728	1	-0.315789	FRMD4A
chr17	13969528	13969529	1	0.191923	COX10-AS1
chr11	14075364	14075365	1	0.354167	SPON1
chr4	14794034	14794184	1	-0.106667	LINC00504
chr20	14880974	14880975	1	-0.388889	MACROD2
chr19	14920105	14920106	1	-0.3125	NA
chr11	15082912	15082913	1	-0.378205	NA
chr18	15133618	15133619	1	-0.288566	NA
chr10	15269199	15269200	1	-0.284091	FAM171A1
chr8	15355062	15355063	1	-0.317016	NA
chr19	15374132	15374133	1	-0.35	AKAP8
chr16	15509247	15509256	1	-0.376877	AC140504,1
chr16	15509247	15509256	1	-0.376877	BMERB1
chr12	15512910	15512911	1	-0.104687	PTPRO
chr17	15618682	15618683	1	0.527778	AC005324,3
chr17	15618682	15618683	1	0.527778	CDRT1
chr11	15727068	15727069	1	-0.375	AC087379,1
chr4	15768700	15768719	1	-0.266667	NA
chr6	15837548	15837549	1	-0.301136	NA
chr17	15851613	15851614	1	-0.334842	SPECC1P1
chr10	15975098	15975099	1	-0.309524	NA
chr4	16145742	16145743	1	-0.268421	NA
chr10	16257070	16257071	1	-0.283077	NA
chr17	16815460	16815461	1	-0.411765	AC098850,4
chr16	16817659	16817660	1	-0.309211	NA
chr11	16864734	16864735	1	-0.30695	PLEKHA7
chr16	16892826	16892827	1	-0.333333	NA
chr12	17128537	17128778	1	-0.222795	AC092110,1
chr2	17135442	17135443	1	-0.114441	NA
chr2	17155187	17155326	1	-0.155839	NA
chr11	17397677	17397693	1	-0.347826	ABCC8
chr19	17414761	17414762	1	-0.321212	AC010319,4
chr19	17414761	17414762	1	-0.321212	BISPR
chr19	17414761	17414762	1	-0.321212	MVB12A
chr17	17683479	17683480	1	0.333333	RAI1
chr8	17773237	17773278	1	-0.153428	MTUS1
chr17	17809368	17809369	1	-0.333333	RAI1
chr20	17826192	17826193	1	-0.270833	NA
chr20	17962678	17962679	1	-0.286275	OVOL2
chr20	17962678	17962679	1	-0.286275	SNX5
chr16	18012987	18012988	1	-0.298077	AC010601,1
chr16	18012987	18012988	1	-0.298077	AC091489,1
chr20	18031241	18031242	1	-0.31746	OVOL2
chr17	18172975	18172976	1	-0.363636	AC087164,1
chr17	18172975	18172976	1	-0.363636	MYO15A
chr8	18283502	18283503	1	-0.375	NA
chr4	18379050	18379051	1	-0.35	NA
chr2	18497999	18498000	1	-0.356863	AC079148,3
chr11	18750021	18750022	1	-0.307692	PTPN5
chr9	18752720	18752721	1	-0.24183	ADAMTSL1
chr10	18954752	18954753	1	0.3375	NA
chr10	19158076	19158077	1	-0.267857	MALRD1
chr2	19165498	19165499	1	-0.229839	LINC01376
chr19	19167828	19167829	1	-0.365385	BORCS8-MEF2B
chr19	19167828	19167829	1	-0.365385	MEF2B
chr13	19178644	19178645	1	0.384211	TUBA3C
chr13	19296654	19296656	1	-0.223742	ANKRD26P3
chr17	19347860	19347861	1	-0.333333	B9D1
chr13	19384886	19384887	1	-0.375	PARP4P2
chr19	19495870	19495871	1	-0.411765	GATAD2A
chr2	19501394	19501514	1	-0.227317	LINC01808
chr19	19598885	19598886	1	0.625	PBX4
chr20	19751109	19751110	1	-0.334842	NA
chr10	19802014	19802015	1	-0.0935428	NA
chr14	19905347	19905348	1	-0.335227	NA
chr20	20107825	20107826	1	-0.285714	CFAP61
chr11	20136380	20136381	1	-0.363354	NA
chr8	20195127	20195128	1	-0.175038	NA
chr10	20216253	20216254	1	-0.104138	PLXDC2
chr12	20316862	20316863	1	-0.352381	NA
chr20	20397779	20397780	1	-0.32	RALGAPA2
chr14	20427633	20427643	1	0.228842	KLHL33
chr17	20472108	20472109	1	-0.333333	NA
chr2	20487389	20487390	1	-0.345098	NA
chr2	20508118	20508119	1	-0.368421	NA
chr19	20573628	20573629	1	0.103423	AC010636,2
chr4	20732341	20732342	1	-0.4	KCNIP4
chr4	20732341	20732342	1	-0.4	PACRGL
chr12	20830051	20830175	1	-0.134677	SLCO1B3
chr12	20830051	20830175	1	-0.134677	SLCO1B3-SLCO1B7
chr11	20878157	20878158	1	-0.3	NELL1
chr11	20939597	20939598	1	-0.338235	NELL1
chr16	20990505	20990506	1	-0.3	DNAH3
chr19	20992283	20992284	1	-0.333333	NA
chr19	21091873	21091874	1	-0.375	ZNF714
chr13	21095807	21095808	1	-0.255682	NA
chr18	21131970	21131971	1	-0.333333	NA
chr8	21243175	21243176	1	-0.118746	AC021613,1
chr20	21245498	21245499	1	-0.4375	KIZ
chr14	21345922	21345923	1	-0.285714	RPGRIP1
chr6	21350616	21350617	1	-0.314381	NA
chr11	21363017	21363018	1	-0.52381	NELL1
chr8	21489050	21489051	1	-0.3125	NA
chr22	21572262	21572296	1	-0.243222	UBE2L3
chr2	21574087	21574088	1	-0.218619	AC018742,1
chr22	21614566	21614567	1	-0.333333	UBE2L3
chr6	21802303	21802304	1	-0.285714	CASC15
chr4	21926221	21926256	1	-0.286325	KCNIP4
chr19	22238538	22238539	1	-0.284783	NA
chr14	22304485	22304548	1	-0.268123	AC244502,1
chr14	22304485	22304548	1	-0.268123	TRAV39
chr4	22326754	22326755	1	-0.198718	AC096719,1
chr4	22367196	22367197	1	-0.162966	ADGRA3
chr12	22406634	22407499	2	-0.176853	ST8SIA1
chr14	22460002	22460003	1	-0.428571	AC244502,1
chr18	22471972	22471973	1	0.363636	NA
chr17	22474936	22474937	1	-0.323077	NA
chr22	22538382	22538474	1	-0.128867	NA
chr14	22566553	22566554	1	-0.3125	DAD1
chr19	22611439	22611440	1	-0.466667	NA
chr16	22849982	22849983	1	-0.411765	HS3ST2
chr13	22912183	22912184	1	-0.088611	LINC00621
chr10	22952897	22952898	1	-0.168425	ARMC3
chr11	22987303	22987304	1	-0.318182	NA
chr22	23075237	23075255	2	0.307692	GNAZ
chr22	23075237	23075255	2	0.307692	RSPH14
chr16	23217623	23217624	1	-0.295238	NA
chr19	23292364	23292365	1	0.0904924	NA
chr6	23297583	23297584	1	-0.466667	NA
chr4	23361348	23361349	1	-0.3125	NA
chr2	23514509	23514510	1	-0.352381	AC011239,1
chr2	23514509	23514510	1	-0.352381	KLHL29
chr22	23519913	23519914	1	-0.4	NA
chr2	23546834	23546835	1	-0.354386	KLHL29
chr12	23565902	23566109	1	0.0810723	SOX5
chr14	23575071	23575072	1	-0.313187	JPH4
chr8	23713445	23713446	1	0.342246	AC012574,1
chr10	23856670	23856671	1	-0.381579	KIAA1217
chr22	23906271	23906272	1	-0.325792	AP000350,6
chr8	23947914	23947915	1	-0.0972159	NA
chr13	23985280	23985281	1	-0.347826	AL359736,1
chr13	23985280	23985281	1	-0.347826	AL445985,1
chr13	23985280	23985281	1	-0.347826	SPATA13
chr2	24009691	24009692	1	0.566667	NA
chr21	24104917	24105165	1	0.0931818	AP000477,3
chr22	24165657	24165671	2	-0.324324	CABIN1
chr20	24226200	24226201	1	0.135558	NA
chr19	24242719	24242720	1	-0.336842	NA
chr13	24389390	24389391	1	-0.336898	NA
chr18	24427397	24427398	1	0.357143	IMPACT
chr11	24551232	24551233	1	-0.145501	LUZP2
chr20	24607759	24607760	1	-0.307692	SYNDIG1
chr20	24629149	24629150	1	-0.347826	SYNDIG1
chr14	24647517	24647518	1	0.115181	AL136018,1
chr10	24728918	24728919	1	-0.308081	NA
chr4	24735670	24735671	1	-0.294118	NA
chr20	24834729	24834730	1	-0.428571	NA
chr13	25043546	25043547	1	-0.3125	NA
chr10	25054678	25054679	1	-0.106842	AL512598,2
chr10	25054678	25054679	1	-0.106842	ENKUR
chr11	25061973	25061974	1	-0.153985	LUZP2
chr20	25131645	25131646	1	-0.375	NA
chr20	25163382	25163383	1	-0.402222	NA
chr22	25231727	25231728	1	-0.352941	CRYBB2
chr4	25536445	25536446	1	0.25463	AC105290,1
chr20	25658236	25658237	1	-0.3125	ZNF337-AS1
chr10	25660239	25660240	1	-0.134479	LINC00836
chr2	25790308	25790346	1	-0.144028	ASXL2
chr16	25856130	25856131	1	0.466667	AC093516,1
chr16	25856130	25856131	1	0.466667	HS3ST4
chr8	26032676	26032677	1	-0.326797	EBF2
chr13	26091927	26091928	1	-0.125572	NA
chr18	26134121	26134318	1	-0.199643	PSMA8
chr6	26562257	26562258	1	-0.139175	NA
chr6	26639284	26639285	1	-0.286713	ZNF322
chr11	26669402	26669403	1	-0.121408	SLC5A12
chr22	26719079	26719080	1	-0.352941	MIATNB
chr18	26868901	26868903	1	-0.277512	AQP4-AS1
chr13	26979510	26979511	1	-0.4	AL160035,1
chr13	27029710	27029711	1	0.142757	NA
chr11	27045707	27045708	1	-0.319853	BBOX1
chr14	27066481	27066482	1	0.124929	AL110292,1
chr18	27262878	27262879	1	-0.146628	NA
chr18	27300411	27300412	1	-0.178066	NA
chr17	27440479	27440480	1	0.190392	NA
chr8	27514719	27514720	1	-0.357143	EPHX2
chr19	27515679	27515680	1	-0.316498	NA
chr22	27578365	27578366	1	-0.325758	NA
chr8	27632737	27632738	1	-0.268889	NA
chr10	27640233	27640234	1	-0.155488	NA
chr4	27880099	27880100	1	-0.307143	NA
chr2	27983402	27983403	1	-0.168466	BABAM2
chr2	27983402	27983403	1	-0.168466	MRPL33
chr2	28409276	28409277	1	-0.352941	FOSL2
chr11	28418286	28418287	1	-0.421053	METTL15
chr4	28422699	28422700	1	0.208865	NA
chr2	28480474	28480571	1	-0.220769	PLB1
chr13	28549826	28549827	1	-0.328571	NA
chr2	28773428	28773429	1	-0.308333	PPP1CB
chr4	28803517	28803518	1	-0.314706	NA
chr13	28868841	28868842	1	-0.347826	MTUS2
chr18	28902014	28902015	1	-0.0975934	NA
chr13	28967677	28967678	1	-0.303406	MTUS2
chr22	28976472	28976473	1	-0.267206	ZNRF3
chr19	28989947	28989948	1	0.433566	NA
chr18	29032370	29032371	1	-0.316092	NA
chr13	29081740	29081741	1	-0.309524	MTUS2
chr10	29483957	29483958	1	-0.347826	SVIL
chr10	29483957	29483958	1	-0.347826	SVIL-AS1
chr6	29495663	29495664	1	-0.297143	NA
chr19	29554684	29554685	1	-0.311111	VSTM2B
chr18	29593413	29593414	1	0.12218	NA
chr4	29667539	29667540	1	-0.4	NA
chr22	29694847	29694848	1	-0.333333	NF2
chr16	29741956	29741957	1	0.272727	NA
chr6	29857331	29857332	1	-0.112854	AL645929,3
chr11	29896674	29896675	1	-0.263158	LINC02755
chr6	29995365	29995366	1	-0.322115	NA
chr11	30174892	30174893	1	-0.344444	AL358944,1
chr2	30229890	30229891	1	-0.354167	NA
chr18	30235648	30235649	1	-0.307692	NA
chr11	30285651	30285652	1	-0.378947	AL358944,1
chr11	30417404	30417405	1	-0.327381	MPPED2
chr19	30552862	30552863	1	-0.468254	ZNF536
chr13	30657377	30657378	1	0.328205	USPL1
chr14	30685889	30685890	1	-0.290476	SCFD1
chr6	30805864	30805865	1	-0.208333	LINC00243
chr10	30812801	30812802	1	0.333333	NA
chr6	31001227	31001228	1	0.333333	NA
chr6	31101188	31101189	1	0.148502	NA
chr4	31124908	31124909	1	-0.286765	PCDH7
chr8	31193792	31193793	1	-0.10262	NA
chr21	31322413	31322778	1	-0.0904255	TIAM1
chr19	31560354	31560355	1	-0.380952	NA
chr17	31612356	31612357	1	0.199123	AC007923,4
chr18	31966244	31966245	1	-0.37395	NA
chr19	31970023	31970024	1	-0.337255	LINC01837
chr22	31994321	31994322	1	-0.304029	LINC02558
chr18	32151118	32151119	1	-0.132924	GAREM1
chr4	32210299	32210300	1	-0.316667	LINC02506
chr22	32621847	32621848	1	-0.266667	SYN3
chr16	32622854	32622855	1	0.318078	NA
chr14	32810398	32810399	1	-0.294118	AKAP6
chr13	32841219	32841220	1	-0.340278	NA
chr8	33021619	33021620	1	-0.273939	AC090204,1
chr1	33086706	33087196	1	-0.11575	AZIN2
chr4	33238631	33238632	1	-0.352941	AC093878,1
chr22	33247853	33247854	1	-0.311547	LARGE1
chr19	33391692	33391693	1	-0.322115	PEPD
chr19	33471073	33471074	1	0.357143	PEPD
chr4	33473229	33473230	1	-0.428571	AC079772,1
chr22	33505677	33505678	1	-0.357143	LARGE1
chr4	33508082	33508083	1	-0.388889	AC079772,1
chr6	33509879	33509880	1	0.369231	NA
chr22	33654692	33654693	1	-0.334928	LARGE1
chr2	33698359	33698360	1	0.418182	NA
chr17	33742437	33742438	1	-0.305556	ASIC2
chr2	33745835	33745864	1	0.233053	LINC01320
chr2	33752453	33752454	1	0.0937176	LINC01320
chr22	33788577	33788578	1	-0.205556	LARGE1
chr4	33790394	33790395	1	-0.4375	AC016687,3
chr16	33886211	33886212	1	0.611111	NA
chr2	34085950	34085951	1	0.185185	LINC01320
chr6	34091799	34091800	1	-0.357143	GRM4
chr8	34098330	34098331	1	-0.273946	NA
chr10	34271355	34271356	1	-0.125606	PARD3
chr14	34359533	34359592	1	-0.28	EGLN3
chr12	34386310	34386948	1	-0.202586	NA
chr13	34387019	34387020	1	-0.375	LINC02343
chr18	34412636	34412637	1	-0.233939	NA
chr13	34422392	34422439	1	-0.0854701	LINC02343
chr10	34466370	34466371	1	-0.354839	PARD3
chr10	34477090	34477091	1	-0.380952	PARD3
chr17	34722857	34722858	1	-0.344444	NA
chr18	34774384	34774385	1	0.312865	DTNA
chr10	34795320	34795321	1	-0.266667	PARD3
chr14	34795821	34795822	1	-0.35	BAZ1A
chr17	34807233	34807234	1	-0.333333	NA
chr19	34854111	34854112	1	-0.266026	AC008555,2
chr19	34854111	34854112	1	-0.266026	AC008555,4
chr17	35016771	35016772	1	-0.305556	AC004223,3
chr17	35016771	35016772	1	-0.305556	RFFL
chr20	35070472	35070537	1	-0.180336	TRPC4AP
chr2	35234060	35234061	1	-0.256008	NA
chr2	35241209	35241210	1	-0.179136	NA
chr2	35271731	35271732	1	-0.224573	AC013442,2
chr2	35298335	35298336	1	-0.21967	NA
chr8	35382491	35382492	1	-0.284722	UNC5D
chr17	35635147	35635148	1	-0.269841	AP2B1
chr11	35649944	35649945	1	0.230137	NA
chr8	35690261	35690262	1	-0.257407	AC105230,1
chr8	35690261	35690262	1	-0.257407	UNC5D
chr18	35806656	35806657	1	-0.305556	NA
chr19	35874051	35874163	1	-0.252544	APLP1
chr6	36245974	36245975	1	-0.4375	PNPLA1
chr4	36305535	36305536	1	-0.375	DTHD1
chr4	36325458	36325459	1	-0.203571	AC104078,2
chr4	36325458	36325459	1	-0.203571	DTHD1
chr6	36325790	36325791	1	-0.363636	BNIP5
chr14	36589459	36589460	1	0.347826	AL132857,2
chr22	36591181	36591198	2	-0.266361	CACNG2
chr2	36640225	36640226	1	-0.131058	FEZ2
chr22	36896040	36896042	1	-0.186063	NA
chr14	37063935	37063936	1	-0.347826	SLC25A21
chr10	37076027	37076030	2	-0.388889	NA
chr8	37116269	37116270	1	0.112903	NA
chr4	37219107	37219138	1	-0.193421	NA
chr8	37260077	37260078	1	-0.3125	NA
chr18	37421960	37421961	1	-0.384615	CELF4
chr14	37430630	37430631	1	-0.224432	MIPOL1
chr22	37521512	37521513	1	-0.365079	NA
chr11	37683987	37683988	1	-0.085476	NA
chr4	37766956	37766957	1	-0.333333	NA
chr11	37796824	37796825	1	-0.294118	NA
chr17	37897751	37897752	1	-0.305556	NA
chr19	37974286	37974287	1	-0.375	SIPA1L3
chr22	38259011	38259012	1	-0.401515	TMEM184B
chr10	38328282	38328324	1	-0.288851	AL117339,5
chr10	38328282	38328324	1	-0.288851	AL133217,1
chr2	38417587	38417588	1	-0.466667	LINC02613
chr8	38459110	38459111	1	-0.333333	FGFR1
chr14	38550862	38550864	1	-0.227273	NA
chr5	38690184	38690745	1	-0.130282	OSMR-AS1
chr22	39101408	39101409	1	-0.391304	APOBEC3H
chr6	39228759	39228760	1	-0.436364	KCNK5
chr17	39238682	39238701	2	0.357143	AC015910,1
chr13	39436571	39436572	1	-0.196522	LHFPL6
chr14	39525129	39525130	1	-0.277778	AL049828,1
chr2	39539144	39539145	1	-0.482517	MAP4K3-DT
chr22	39596767	39596768	1	-0.284615	CACNA1I
chr18	39903999	39904000	1	-0.0843086	LINC01901
chr13	40048255	40048256	1	-0.287879	NA
chr17	40084226	40084227	1	-0.421053	THRA
chr14	40172140	40172141	1	-0.291444	AL049828,1
chr8	40236833	40236834	1	0.106899	NA
chr11	40372555	40372558	1	-0.35	LRRC4C
chr19	40609452	40609453	1	0.368421	LTBP4
chr11	40845989	40845990	1	-0.19656	LRRC4C
chr13	40870115	40870116	1	0.36	TPTE2P5
chr6	40889759	40889760	1	-0.319444	NA
chr21	41145626	41145627	1	0.265509	LINC00323
chr21	41245729	41246033	1	-0.198718	BACE2
chr19	41539554	41539555	1	-0.373737	NA
chr17	41631457	41631458	1	-0.466667	KRT42P
chr6	41785031	41785032	1	-0.363636	AL365205,1
chr6	41785031	41785032	1	-0.363636	FRS3
chr6	41785031	41785032	1	-0.363636	PRICKLE4
chr22	41934079	41934090	1	0.349091	NA
chr14	42262524	42262525	1	0.138215	AL445074,1
chr14	42265236	42265237	1	0.122548	AL445074,1
chr22	42368236	42368237	1	0.272727	LINC01315
chr18	42373312	42373313	1	-0.388889	LINC00907
chr11	42471864	42471865	1	0.27795	NA
chr10	42526875	42526876	1	0.236045	ZNF37BP
chr13	42765293	42765294	1	-0.37931	NA
chr10	42765328	42765329	1	-0.25	NA
chr13	42808861	42808862	1	-0.4	NA
chr8	42813529	42813530	1	-0.388889	NA
chr10	42864049	42864050	1	-0.228193	NA
chr22	42882193	42882194	1	-0.47619	PACSIN2
chr13	43004085	43004116	1	-0.295	NA
chr13	43172057	43172058	1	-0.318182	NA
chr5	43203854	43203855	1	-0.294118	NIM1K
chr17	43367155	43367179	1	0.279487	LINC00910
chr4	43378421	43378422	1	-0.314706	NA
chr17	43455789	43455790	1	-0.34413	NA
chr22	43471721	43471722	1	-0.373684	MPPED1
chr14	43518717	43518718	1	-0.153714	NA
chr17	43649694	43649695	1	-0.301754	MEOX1
chr17	43815719	43815720	1	-0.328571	MPP3
chr8	43825954	43825955	1	-0.253321	NA
chr11	43878551	43878552	1	-0.375	AC087521,2
chr13	44136132	44136133	1	-0.286275	LINC00390
chr13	44136132	44136133	1	-0.286275	SMIM2-AS1
chr6	44176564	44176565	1	-0.5	CAPN11
chr21	44202070	44205130	1	-0.223214	AP001057,1
chr21	44202070	44205130	1	-0.223214	GATD3A
chr2	44239409	44239410	1	-0.147469	AC013717,1
chr2	44239409	44239410	1	-0.147469	PPM1B
chr17	44354770	44354781	1	0.39375	FAM171A2
chr13	44365983	44365984	1	-0.35	NA
chr13	44729643	44729644	1	-0.384615	NA
chr17	45047300	45047301	1	-0.316667	DCAKD
chr10	45143856	45143857	1	-0.19656	AL358394,3
chr10	45143856	45143857	1	-0.19656	CUBNP3
chr10	45143856	45143857	1	-0.19656	RSU1P2
chr11	45267163	45267164	1	-0.333333	SYT13
chr6	45310278	45310279	1	-0.375	SUPT3H
chr22	45415171	45415172	1	-0.378947	RIBC2
chr6	45519747	45519748	1	-0.363636	RUNX2
chr6	45652181	45652182	1	-0.287037	RUNX2
chr6	45743254	45743273	1	0.28252	NA
chr2	45840208	45840209	1	0.388889	PRKCE
chr22	45926798	45926799	1	-0.333333	WNT7B
chr19	45953223	45953224	1	0.307692	NOVA2
chr5	45954526	45954527	1	0.4375	NA
chr14	46135093	46135094	1	-0.315789	LINC00871
chr6	46280411	46280412	1	-0.333333	RCAN2
chr4	46317973	46317974	1	-0.14815	GABRA2
chr11	46375607	46375608	1	-0.4	DGKZ
chr11	46397536	46397537	1	0.363636	AMBRA1
chr13	46504097	46504098	1	-0.295238	LINC01198
chr8	46856950	46856951	1	-0.411765	LINC00293
chr11	46879010	46879011	1	0.307692	LRP4
chr4	46942943	46942944	1	-0.176393	GABRA4
chr22	46969696	46969697	1	-0.333333	TBC1D22A
chr8	47027339	47027340	1	0.152941	NA
chr22	47200261	47200262	1	-0.352941	NA
chr2	47343985	47343986	1	-0.357143	EPCAM-DT
chr13	47369693	47369694	1	0.0994536	NA
chr19	47370372	47370373	1	-0.52381	DHX34
chr14	47382153	47382154	1	-0.342105	MDGA2
chr13	47385498	47385499	1	-0.461538	NA
chr17	47498802	47498803	1	-0.338235	NA
chr22	47609290	47609297	1	-0.271242	NA
chr14	47627309	47627310	1	0.392857	MDGA2
chr22	47696504	47696505	1	-0.244589	AL117329,1
chr22	47701178	47701179	1	-0.223739	AL117329,1
chr17	47744435	47744436	1	-0.326797	TBX21
chr6	47767420	47767421	1	0.138228	NA
chr4	47922651	47922652	1	-0.424837	NIPAL1
chr2	48080561	48080562	1	-0.333333	AC092650,1
chr22	48090263	48090354	1	0.238298	NA
chr16	48195408	48195423	1	-0.294118	ABCC11
chr3	48215868	48215869	1	-0.277778	NA
chr4	48281679	48281680	1	-0.286713	NA
chr8	48325325	48325326	1	-0.3	NA
chr8	48398110	48398111	1	0.5	NA
chr19	48570551	48570552	1	-0.294118	AC008403,3
chr19	48570551	48570552	1	-0.294118	SULT2B1
chr13	48601127	48601128	1	0.380952	NA
chr8	48666139	48666140	1	-0.3125	AC022915,2
chr6	48904328	48904329	1	-0.0877684	NA
chr6	48933642	48933643	1	-0.135387	NA
chr2	49002471	49002472	1	-0.346154	AC009975,1
chr2	49002471	49002472	1	-0.346154	FSHR
chr8	49097872	49097873	1	-0.310924	AC044893,1
chr12	49366199	49366496	1	0.240812	NA
chr16	49387306	49387307	1	-0.150943	C16orf78
chr13	49443453	49443456	1	0.448052	CAB39L
chr22	49695851	49695852	1	-0.146153	NA
chr22	49820763	49820764	1	-0.345238	BRD1
chr19	50003511	50003547	2	-0.239801	VRK3
chr16	50117549	50117550	1	-0.145887	AC007610,3
chr17	50171257	50171258	1	-0.288889	SGCA
chr8	50195938	50195939	1	-0.333333	SNTG1
chr17	50202964	50202965	1	-0.318182	AC015909,1
chr3	50683959	50683960	1	-0.311538	DOCK3
chr16	50819988	50819989	1	-0.354167	NA
chr8	50944672	50944673	1	-0.356209	NA
chr16	50975160	50975161	1	-0.368421	NA
chr10	51012352	51012353	1	-0.252525	PRKG1
chr6	51312189	51312190	1	-0.311765	NA
chr2	51396793	51396794	1	0.16715	AC007402,1
chr14	51446901	51447062	1	-0.196757	NA
chr19	51566358	51566360	1	-0.127086	NA
chr2	51567615	51567616	1	-0.159	AC007402,1
chr2	51588150	51588151	1	-0.194994	AC007402,1
chr16	51634172	51634174	1	-0.18287	HNRNPA1P48
chr17	51668171	51668172	1	-0.428571	CA10
chr5	51692841	51692842	1	-0.315789	NA
chr2	51723962	51723963	1	0.156755	AC007402,1
chr3	51776497	51776498	1	-0.314815	NA
chr2	51780810	51780811	1	-0.389744	AC007402,1
chr17	51813670	51813671	1	-0.333333	CA10
chr6	51937697	51937698	1	-0.384615	PKHD1
chr16	51983836	51983837	1	-0.288485	NA
chr5	52001297	52001298	1	-0.39881	NA
chr5	52350551	52350552	1	-0.333333	NA
chr6	52408668	52408674	2	-0.388889	EFHC1
chr8	52445564	52445574	3	-0.315789	ST18
chr2	52491777	52491778	1	0.151341	NA
chr6	52512367	52512368	1	-0.301282	EFHC1
chr6	52512367	52512368	1	-0.301282	TRAM2
chr10	52580866	52580867	1	-0.310924	LNCAROD
chr10	52624447	52624448	1	-0.261905	LNCAROD
chr16	52631543	52631544	1	-0.318182	AC026462,4
chr16	52631543	52631544	1	-0.318182	CASC16
chr6	52736813	52736814	1	-0.388889	NA
chr19	52778722	52778723	1	-0.375	ZNF600
chr2	52889408	52889409	1	0.5	AC010967,1
chr5	52896583	52896584	1	-0.282353	ITGA1
chr10	52926459	52926460	1	-0.4	NA
chr10	52972263	52972264	1	-0.286765	NA
chr5	53157055	53157056	1	-0.255952	NA
chr14	53191855	53191973	1	-0.105556	AL365295,1
chr10	53234320	53234321	1	-0.416667	NA
chr4	53473041	53473042	1	0.105158	AC058822,1
chr4	53473041	53473042	1	0.105158	LNX1
chr19	53482976	53482977	1	0.25096	ZNF813
chr14	53571718	53571719	1	-0.337662	AL365295,1
chr19	53644655	53644656	1	-0.305556	NA
chr1	53650316	53650317	1	-0.298077	GLIS1
chr14	53686649	53686650	1	-0.411765	AL365295,1
chr14	53686649	53686650	1	-0.411765	LINC02331
chr2	53728714	53728715	1	-0.341137	ASB3
chr8	53774663	53774664	1	-0.375	ATP6V1H
chr13	53928038	53928039	1	-0.120292	LINC00558
chr8	54198250	54198251	1	-0.147391	NA
chr19	54260149	54260150	1	-0.277778	NA
chr5	54260411	54260412	1	-0.237143	ARL15
chr16	54300602	54300603	1	-0.321429	NA
chr10	54439041	54439042	1	0.239409	PCDH15
chr13	54583682	54583683	1	-0.357143	AL442636,1
chr3	54640611	54640612	1	-0.409091	CACNA2D3
chr10	54740303	54740304	1	0.125584	PCDH15
chr17	54905998	54906114	1	-0.246873	TOM1L1
chr3	54962923	54962924	1	-0.363636	CACNA2D3
chr3	54962923	54962924	1	-0.363636	LRTM1
chr5	54989300	54989302	1	-0.169975	ESM1
chr19	55432406	55432407	1	-0.454545	SHISA7
chr10	55539033	55539034	1	-0.115528	AC016822,1
chr10	55539033	55539034	1	-0.115528	PCDH15
chr2	55835928	55835929	1	-0.205	NA
chr3	55868592	55868791	1	-0.23023	ERC2
chr10	55965214	55965215	1	-0.428571	NA
chr19	55977394	55977395	1	-0.17548	NLRP8
chr2	56062569	56062570	1	-0.094132	AC011306,1
chr13	56182633	56182634	1	-0.304348	NA
chr2	56242674	56242675	1	-0.225	AC007744,1
chr2	56242674	56242675	1	-0.225	CCDC85A
chr2	56271528	56271529	1	-0.322105	AC007744,1
chr2	56271528	56271529	1	-0.322105	CCDC85A
chr5	56554648	56554649	1	-0.316667	C5orf67
chr19	56587857	56587858	1	-0.478022	ZNF470
chr16	56700409	56700410	1	-0.133473	NA
chr14	57018877	57018878	1	-0.3	AL137100,3
chr14	57018877	57018878	1	-0.3	OTX2-AS1
chr10	57040913	57040924	2	-0.149166	NA
chr3	57183119	57183120	1	-0.428571	NA
chr2	57225265	57225266	1	0.285714	NA
chr10	57260940	57261124	2	-0.11413	NA
chr2	57411463	57411464	1	0.132548	NA
chr5	57475109	57475638	1	-0.219106	AC025470,2
chr2	57475343	57475344	1	-0.267586	NA
chr5	57512677	57512678	1	-0.38961	AC025470,2
chr14	57535326	57535327	1	-0.368421	NA
chr14	57637472	57637473	1	-0.352941	SLC35F4
chr5	57715502	57715503	1	-0.151333	NA
chr2	57871822	57871824	1	-0.202899	NA
chr10	58066131	58066132	1	-0.294372	NA
chr2	58079676	58079677	1	-0.105061	VRK2
chr16	58137834	58137979	1	-0.101426	AC009107,2
chr5	58144589	58144590	1	-0.0835066	AC008786,1
chr2	58236405	58236406	1	-0.0983812	FANCL
chr5	58428760	58428761	1	-0.402256	NA
chr19	58497606	58497607	1	-0.333333	SLC27A5
chr13	58505067	58505068	1	-0.345238	NA
chr4	58547080	58547081	1	-0.25	NA
chr2	58600748	58600749	1	-0.31746	LINC01122
chr20	58627657	58628789	1	-0.184524	NA
chr5	58743578	58743579	1	-0.4	AC016642,1
chr5	58743578	58743579	1	-0.4	RAB3C
chr5	58795046	58795047	1	-0.339744	AC016642,1
chr5	58795046	58795047	1	-0.339744	RAB3C
chr10	58964012	58964013	1	-0.384615	NA
chr2	58996824	58996971	1	-0.192453	LINC01122
chr16	59015953	59015954	1	-0.181184	AC106793,1
chr4	59188709	59188710	1	0.0951152	NA
chr13	59413576	59413577	1	-0.235294	NA
chr8	59419032	59419033	1	-0.4	NA
chr4	59789027	59789082	1	-0.244497	AC093857,1
chr3	59912382	59912383	1	-0.4	FHIT
chr2	59948367	59948368	1	-0.31746	AC007100,1
chr2	60074033	60074049	1	-0.283033	AC007100,1
chr18	60090903	60091297	1	-0.177479	NA
chr16	60260313	60260314	1	-0.37931	NA
chr14	60345282	60345283	1	0.137017	NA
chr11	60401573	60401574	1	0.351648	MS4A14
chr3	60844850	60844851	1	-0.164126	FHIT
chr3	60984703	60984704	1	-0.304622	FHIT
chr4	61221174	61221176	1	0.201149	ADGRL3
chr14	61224383	61224384	1	0.199747	PRKCH
chr2	61239077	61239078	1	-0.262422	USP34
chr3	61408017	61408018	1	-0.25	NA
chr10	61424780	61424781	1	-0.145292	TMEM26
chr11	61462979	61462980	1	-0.35	AP003108,2
chr14	61488743	61488744	1	-0.287037	PRKCH
chr11	61588393	61588417	2	0.322368	NA
chr6	61732696	61732747	1	-0.262821	KHDRBS2
chr5	61891494	61891495	1	-0.268571	AC008877,1
chr5	61901507	61901508	1	-0.353535	AC008877,1
chr8	62163799	62164543	1	-0.143098	NA
chr11	62219791	62219792	1	-0.333333	AP003306,1
chr4	62309932	62309933	1	-0.409091	NA
chr14	62346721	62346722	1	-0.283636	NA
chr13	62381515	62381516	1	-0.235294	NA
chr3	62401162	62401163	1	-0.254941	CADPS
chr6	62479313	62479314	1	-0.238487	NA
chr3	62669817	62669818	1	-0.316498	CADPS
chr3	62725500	62725501	1	-0.328431	CADPS
chr3	62934593	62934594	1	0.42735	NA
chr16	63129669	63129693	3	-0.302466	NA
chr17	63414222	63414223	1	-0.277778	AC005828,1
chr17	63414222	63414223	1	-0.277778	AC005828,3
chr17	63414222	63414223	1	-0.277778	TANC2
chr5	63432518	63432519	1	-0.333333	NA
chr2	63450359	63450360	1	-0.3	WDPCP
chr3	63480861	63480862	1	-0.316176	SYNPR
chr3	63480861	63480862	1	-0.316176	SYNPR-AS1
chr5	63482014	63482015	1	-0.183359	NA
chr13	63526900	63526901	1	-0.17791	NA
chr3	63575516	63575517	1	-0.263889	SYNPR
chr20	63613905	63614442	1	-0.115385	GMEB2
chr3	63663254	63663255	1	0.300439	SNTN
chr3	63707487	63707488	1	-0.308333	NA
chr18	64068613	64068873	1	-0.183672	LINC01924
chr5	64094590	64094591	1	-0.239583	NA
chr6	64466513	64466514	1	-0.15389	EYS
chr17	64496707	64496708	1	0.318182	POLG2
chr11	64935944	64935945	1	-0.375	NA
chr3	65215707	65215708	1	0.307692	NA
chr16	65519109	65519110	1	-0.207143	LINC00922
chr14	65527463	65527581	1	0.129822	FUT8
chr4	65571012	65571013	1	-0.22028	EPHA5
chr8	65583732	65584213	1	0.10678	NA
chr6	65761359	65761360	1	-0.270833	NA
chr11	65777494	65777495	1	-0.323077	AP5B1
chr14	65803802	65803803	1	-0.333333	NA
chr13	66175217	66175218	1	0.173797	NA
chr6	66210431	66210432	1	-0.35	NA
chr14	66924953	66924954	1	-0.116173	GPHN
chr17	67245728	67245729	1	-0.307692	AC007448,4
chr17	67245728	67245729	1	-0.307692	AC007448,5
chr17	67245728	67245729	1	-0.307692	HELZ
chr6	67705207	67705208	1	-0.149788	NA
chr14	67734878	67734879	1	-0.333333	ZFYVE26
chr4	67915232	67915233	1	-0.277778	TMPRSS11A
chr4	67915232	67915233	1	-0.277778	UBA6-AS1
chr16	67942291	67942292	1	-0.4	LCAT
chr13	68157476	68157477	1	0.3375	NA
chr5	68945393	68945394	1	-0.272727	AC093523,2
chr11	68966018	68966019	1	-0.416667	NA
chr14	69183791	69183792	1	0.375	AL359317,2
chr13	69239313	69239314	1	-0.112473	LINC00383
chr14	69314677	69314678	1	-0.330144	GALNT16
chr14	69361938	69361964	1	-0.289831	NA
chr4	69438157	69438159	1	0.196713	AC108078,3
chr16	69441979	69441980	1	-0.321429	CYB5B
chr17	69461842	69461843	1	-0.285714	MAP2K6
chr11	69601434	69601435	1	-0.388889	NA
chr6	69632641	69632642	1	-0.28976	NA
chr14	69675171	69675172	1	0.268398	SUSD6
chr11	69889540	69889541	1	-0.384615	NA
chr2	69989252	69989253	1	-0.307692	PCBP1-AS1
chr14	70102483	70102484	1	-0.112078	SLC8A3
chr17	70194684	70194685	1	0.120773	NA
chr17	70264070	70264071	1	-0.131938	NA
chr13	70392715	70392716	1	-0.110904	NA
chr16	70423780	70423781	1	0.291667	ST3GAL2
chr16	70455131	70455132	1	0.25	FCSK
chr11	70610770	70610771	1	0.340278	SHANK2
chr4	70623130	70623131	1	0.181122	NA
chr11	70667436	70667499	1	-0.298485	SHANK2
chr16	70796630	70796631	1	-0.303922	VAC14
chr2	70876354	70876355	1	-0.394231	NA
chr11	70883535	70883536	1	-0.307692	SHANK2
chr17	70947766	70947771	1	-0.313043	NA
chr3	70948591	70948752	1	-0.239234	NA
chr14	71164679	71164680	1	-0.333333	NA
chr6	71262861	71262862	1	-0.294118	AL589935,1
chr16	71326843	71326844	1	-0.4	NA
chr11	71369534	71369535	1	-0.420635	NA
chr14	71385447	71385449	1	-0.265385	SIPA1L1
chr4	71517594	71517595	1	0.0967542	SLC4A4
chr2	71595482	71595483	1	-0.318182	DYSF
chr2	71845351	71845352	1	-0.318182	NA
chr11	72011085	72011086	1	-0.333333	NUMA1
chr5	72039968	72039969	1	-0.339744	NA
chr16	72140548	72140549	1	-0.3375	PMFBP1
chr16	72348857	72348858	1	-0.311966	LINC01572
chr5	72441260	72441319	1	-0.243021	AC093278,2
chr5	72441260	72441319	1	-0.243021	ZNF366
chr17	73069999	73070000	1	-0.291444	SLC39A11
chr5	73194769	73194770	1	-0.411765	NA
chr11	73236736	73236737	1	-0.333333	NA
chr17	73250678	73250679	1	0.309524	CPSF4L
chr11	73395641	73395642	1	-0.3125	AP000763,4
chr11	73395641	73395642	1	-0.3125	RELT
chr14	73458775	73458776	1	0.307692	AC005280,3
chr17	73480546	73480547	1	-0.284783	SDK2
chr17	73490337	73490338	1	-0.307692	SDK2
chr16	73511201	73511202	1	0.347222	ZFHX3
chr2	73560845	73560846	1	-0.490385	ALMS1
chr16	73616589	73616590	1	-0.38961	ZFHX3
chr3	73766973	73766975	1	-0.2622	NA
chr17	73962674	73962675	1	-0.125287	NA
chr5	73973644	73973645	1	-0.322222	NA
chr11	73977936	73977937	1	-0.25	UCP2
chr6	74027091	74027092	1	-0.347826	NA
chr4	74028657	74028658	1	-0.0826629	NA
chr3	74122934	74122935	1	-0.306763	NA
chr2	74209992	74209993	1	-0.4375	MTHFD2
chr5	74223900	74223901	1	-0.103472	LINC01331
chr16	74306359	74306360	1	-0.285714	AC009120,2
chr5	74341033	74341034	1	-0.150884	LINC01331
chr5	74341033	74341034	1	-0.150884	LINC01333
chr14	74386760	74386761	1	-0.304813	NA
chr13	74467697	74467698	1	-0.335227	AL355390,2
chr4	74595464	74595465	1	-0.448276	NA
chr6	74611212	74611213	1	0.255556	AL356277,3
chr6	74611212	74611213	1	0.255556	AL357507,1
chr6	74677557	74677558	1	-0.179277	AL356277,3
chr6	74677557	74677558	1	-0.179277	AL357507,1
chr2	74691297	74691298	1	-0.3125	NA
chr14	74742484	74742485	1	0.340336	NA
chr16	74792816	74792817	1	-0.3125	NA
chr17	74820970	74820971	1	-0.333333	TMEM104
chr6	75209860	75210034	1	-0.215	NA
chr14	75294581	75294588	1	0.342432	LINC01220
chr11	75559657	75559658	1	-0.3125	NA
chr5	75784701	75784702	1	-0.170707	NA
chr3	75817187	75817188	1	-0.204465	NA
chr4	76090564	76090565	1	0.286275	ART3
chr3	76135871	76135872	1	-0.340336	ROBO2
chr11	76233974	76234112	1	-0.179673	NA
chr6	76318224	76318225	1	0.26	NA
chr14	76395575	76395576	1	-0.411765	ESRRB
chr16	76797660	76797661	1	-0.332237	AC106729,1
chr16	76797660	76797661	1	-0.332237	AC106741,2
chr6	77025315	77025316	1	-0.310924	AL355612,1
chr16	77155468	77155469	1	-0.375	NA
chr4	77227489	77227490	1	-0.307692	CCNG2
chr4	77347521	77347522	1	-0.477273	CCNG2
chr4	77426038	77426039	1	-0.295238	AC092674,1
chr4	77426038	77426039	1	-0.295238	CCNG2
chr2	77573670	77573671	1	-0.283333	LRRTM4
chr16	77699930	77699931	1	-0.2331	NA
chr17	77815435	77815436	1	-0.333333	NA
chr5	77922653	77922654	1	-0.30622	NA
chr14	78141683	78141684	1	-0.384615	NA
chr6	78207207	78207208	1	-0.357143	NA
chr4	78244266	78244267	1	0.232639	FRAS1
chr14	78303843	78303958	1	-0.198052	NRXN3
chr2	78356161	78356162	1	-0.3125	NA
chr3	78361167	78361168	1	-0.291667	NA
chr6	78502762	78502763	1	-0.316667	NA
chr11	78706759	78706760	1	-0.285714	TENM4
chr13	78753835	78753909	1	-0.224359	NA
chr11	78788369	78788370	1	-0.384615	TENM4
chr14	78960162	78960163	1	-0.365385	NRXN3
chr11	79090511	79090512	1	-0.35	TENM4
chr17	79292466	79292467	1	0.421053	RBFOX3
chr14	79403248	79403250	1	-0.234764	NRXN3
chr16	79480985	79480986	1	-0.230769	NA
chr18	79507384	79508298	2	0.183333	NFATC1
chr2	79970553	79970554	1	-0.484848	CTNNA2
chr16	80206582	80206583	1	-0.216802	AC105411,1
chr17	80294637	80294638	1	-0.345238	RNF213
chr17	80471241	80471242	1	-0.366667	NPTX1
chr4	80668797	80668798	1	0.311966	CFAP299
chr6	80683505	80683651	1	-0.101899	NA
chr4	80886710	80886815	1	-0.155123	CFAP299
chr6	80899997	80899998	1	-0.333333	NA
chr16	80907808	80907814	2	-0.344828	AC009070,1
chr14	80998345	80998346	1	-0.315789	TSHR
chr6	81051030	81051031	1	-0.314286	NA
chr2	81096369	81096370	1	-0.332237	NA
chr6	81137386	81137387	1	-0.26945	NA
chr4	81189251	81189252	1	-0.136196	AC139722,1
chr4	81189251	81189252	1	-0.136196	PRKG2
chr3	81242995	81242996	1	0.392308	NA
chr6	81578560	81578576	1	-0.293939	TENT5A
chr14	81670666	81670667	1	-0.106027	NA
chr17	81685700	81685701	1	0.307692	HGS
chr2	81724200	81724231	1	-0.313341	NA
chr16	81997329	81997363	1	-0.253918	SDR42E1
chr16	82035192	82035199	1	-0.294634	HSD17B2
chr6	82496298	82496299	1	-0.164039	NA
chr5	82542514	82542515	1	-0.297659	NA
chr16	82632512	82632534	1	-0.28876	CDH13
chr16	82815094	82815116	1	-0.268036	AC099506,1
chr16	82815094	82815116	1	-0.268036	CDH13
chr4	82852832	82852833	1	-0.380952	SEC31A
chr4	82905584	82905585	1	0.401515	THAP9
chr11	82949318	82949319	1	0.113987	DDIAS
chr11	82949318	82949319	1	0.113987	PRCP
chr14	83102758	83102759	1	0.240448	NA
chr6	83243529	83243675	5	-0.10192	ME1
chr11	83383232	83383233	1	-0.285714	AP000446,1
chr11	83588293	83588294	1	-0.307692	DLG2
chr6	83652772	83652773	1	-0.144384	SNAP91
chr12	83716819	83716820	1	-0.145432	NA
chr16	84194108	84194109	1	-0.43609	AC009123,1
chr16	84194108	84194109	1	-0.43609	ADAD2
chr13	84306478	84306479	1	-0.326389	AL162493,1
chr16	84320149	84320150	1	-0.288889	WFDC1
chr16	84324740	84324741	1	0.110515	WFDC1
chr14	84385127	84385128	1	-0.110078	NA
chr4	84593940	84593941	1	-0.354691	CDS1
chr16	84630917	84630918	1	0.291444	NA
chr2	84642423	84642424	1	-0.119213	DNAH6
chr5	84795316	84795317	1	-0.323529	NA
chr2	84836504	84836505	1	-0.144186	TRABD2A
chr2	84859986	84859987	1	-0.411765	TRABD2A
chr14	85107572	85107573	1	-0.248252	NA
chr11	85158772	85158773	1	-0.368421	DLG2
chr16	85395311	85395312	1	-0.397059	GSE1
chr2	85409994	85409995	1	-0.378947	CAPG
chr4	85531260	85531261	1	-0.354839	ARHGAP24
chr2	85755763	85755773	1	0.353261	ATOH8
chr4	85827621	85827622	1	-0.388889	ARHGAP24
chr16	85948328	85948329	1	0.333333	AC092723,5
chr16	85950677	85950678	1	0.315789	NA
chr6	86192583	86192584	1	-0.333333	NA
chr13	86271203	86271204	1	-0.206452	NA
chr14	86282811	86282812	1	0.291176	NA
chr3	86453806	86453807	1	0.0968851	NA
chr4	86481985	86481986	1	-0.276398	MAPK10
chr3	86514026	86514027	1	-0.255848	NA
chr14	86894303	86894306	1	0.24726	NA
chr5	86974728	86974729	1	0.13392	AC109492,1
chr16	87065920	87065921	1	0.346154	LINC02181
chr3	87348319	87348320	1	-0.117824	NA
chr11	87467046	87467047	1	-0.333333	NA
chr6	88047674	88047751	2	0.257272	AL136096,1
chr6	88107869	88107870	1	-0.190934	NA
chr16	88196805	88197521	2	-0.298019	NA
chr6	88353094	88353095	1	-0.352941	AL139042,1
chr5	88361745	88361746	1	-0.6	TMEM161B-AS1
chr16	88528550	88528551	1	-0.363636	AC116552,1
chr16	88528550	88528551	1	-0.363636	ZFPM1
chr16	88897000	88897001	1	-0.405594	CBFA2T3
chr16	88975347	88975399	1	0.150255	CBFA2T3
chr16	88980316	88980317	1	-0.127536	NA
chr3	89006965	89006966	1	0.123893	NA
chr16	89224257	89224258	1	-0.3	ZNF778
chr16	89250550	89250551	1	-0.368421	NA
chr16	89269168	89269194	1	-0.0834915	AC137932,3
chr16	89269168	89269194	1	-0.0834915	ANKRD11
chr3	89492181	89492182	1	-0.116858	NA
chr3	89867643	89867644	1	-0.222222	NA
chr16	90082812	90082813	1	-0.375	PRDM7
chr11	90520884	90520885	1	0.105465	DISC1FP1
chr6	90562508	90562532	1	-0.273836	MAP3K7
chr5	90566799	90566800	1	0.111292	ADGRV1
chr6	90828165	90828166	1	-0.36	NA
chr6	91286277	91286278	1	-0.27871	NA
chr11	91421845	91421846	1	-0.316176	NA
chr2	91709346	91709347	1	0.0840044	AC027612,2
chr5	91737269	91737270	1	-0.192253	AC093298,2
chr11	92173093	92173094	1	-0.333333	NA
chr5	92375175	92375176	1	-0.25	AC114316,1
chr11	92622971	92622972	1	-0.477778	FAT3
chr12	92750766	92751085	1	-0.105615	PLEKHG7
chr11	93048176	93048177	1	-0.263889	NA
chr13	93074949	93074950	1	-0.256966	NA
chr13	93212778	93212779	1	-0.283333	NA
chr13	93341447	93341448	1	-0.141509	GPC6
chr13	93367582	93367583	1	-0.111507	GPC6
chr11	93923800	93923801	1	0.362745	NA
chr6	94070317	94070318	1	-0.32381	NA
chr6	94191770	94191771	1	-0.334842	AL157378,1
chr3	94284612	94284613	1	-0.280193	NA
chr3	94361970	94361971	1	0.147842	NA
chr6	94486149	94486150	1	-0.282051	NA
chr13	95168047	95168048	1	-0.35	ABCC4
chr2	95284767	95284768	1	-0.307692	PROM2
chr8	95678863	95679307	1	-0.160335	C8orf37-AS1
chr2	95783932	95783933	1	-0.333333	NA
chr5	95790831	95790832	1	-0.351648	GLRX
chr5	95790831	95790832	1	-0.351648	RHOBTB3
chr12	96210235	96210456	1	0.199204	ELK3
chr5	96618930	96618931	1	-0.436364	AC104123,1
chr5	96618930	96618931	1	-0.436364	CAST
chr2	96700013	96700014	1	-0.357143	FER1L5
chr13	96873016	96873070	1	-0.254839	NA
chr13	96914158	96914160	1	-0.135714	NA
chr11	97001243	97001244	1	-0.245442	NA
chr11	97022494	97022495	1	-0.0874469	NA
chr3	97270541	97270542	1	-0.355556	EPHA6
chr13	97376531	97376532	1	-0.254941	MBNL2
chr5	97483359	97483360	1	-0.360577	NA
chr11	97616789	97616790	1	-0.328571	NA
chr13	98139946	98139947	1	-0.25	NA
chr13	98584028	98584029	1	-0.272727	NA
chr3	98888694	98888695	1	-0.30543	DCBLD2
chr2	99375206	99375207	1	-0.113596	EIF5B
chr5	99841714	99841715	1	0.182084	NA
chr6	100252192	100252193	1	-0.186843	NA
chr6	100403493	100403494	1	-0.266667	SIM1
chr3	100582678	100582679	1	-0.333333	NA
chr5	100615878	100615879	1	-0.378571	NA
chr6	101173860	101173861	1	0.162602	NA
chr13	101308767	101308768	1	-0.277778	NALCN
chr13	101606524	101606525	1	-0.25	ITGBL1
chr7	102028084	102028122	3	-0.232903	CUX1
chr3	102065613	102065614	1	0.200468	NA
chr7	102065780	102065781	1	-0.333333	CUX1
chr11	102108173	102108174	1	-0.2975	AP001527,1
chr13	102243689	102243690	1	-0.444444	FGF14
chr7	102282529	102282530	1	-0.346154	CUX1
chr7	102425001	102425002	1	0.307692	PRKRIP1
chr12	103017595	103017596	1	-0.287273	NA
chr12	103046209	103046210	1	-0.375	NA
chr13	103340595	103340596	1	0.24359	NA
chr2	103397441	103397491	1	-0.187166	AC011593,1
chr2	103516348	103516349	1	-0.146912	NA
chr7	103555248	103555249	1	-0.421053	RELN
chr8	103763502	103763934	2	-0.101168	RIMS2
chr7	104012301	104012302	1	0.148815	NA
chr3	104125226	104125227	1	-0.295455	NA
chr11	104139803	104139921	1	-0.124444	PDGFD
chr12	104231812	104231813	1	-0.325397	TXNRD1
chr6	104255337	104255338	1	-0.253289	NA
chr6	104348760	104348761	1	-0.105039	NA
chr12	104363195	104363196	1	-0.321429	NA
chr7	104746298	104746299	1	-0.363636	LHFPL3
chr7	104746298	104746299	1	-0.363636	LHFPL3-AS1
chr7	104827228	104827229	1	-0.266667	LHFPL3
chr13	104854356	104854357	1	-0.304348	NA
chr12	104891089	104891090	1	-0.363636	SLC41A2
chr2	105001577	105001578	1	-0.230769	MRPS9-AS2
chr11	105032210	105032211	1	0.168324	CASP1
chr2	105196151	105196152	1	-0.320175	NA
chr11	105436062	105436063	1	0.149202	CARD18
chr11	105493221	105493222	1	0.22093	CARD18
chr7	105854309	105854310	1	-0.375	ATXN7L1
chr2	105901838	105901839	1	-0.428571	AC009505,1
chr3	106055148	106055149	1	-0.0849488	NA
chr7	106354279	106354280	1	-0.104037	NA
chr2	106363104	106363105	1	0.294595	NA
chr13	106365499	106365500	1	-0.207199	AL139379,1
chr2	106489965	106489966	1	0.35	CD8B2
chr7	106554085	106554086	1	-0.357143	AC004917,1
chr13	107054055	107054057	1	-0.189885	NA
chr2	107529672	107529673	1	-0.380952	LINC01885
chr2	107529672	107529673	1	-0.380952	LINC01886
chr12	107652328	107652329	1	-0.345411	BTBD11
chr2	108263283	108263284	1	-0.405594	SULT1C3
chr11	108538180	108538311	2	-0.192784	EXPH5
chr11	108604119	108604120	1	-0.296925	NA
chr7	108629555	108629556	1	-0.308333	AC005487,1
chr7	108807999	108808000	1	-0.25	NA
chr2	108921061	108921062	1	-0.363636	EDAR
chr7	108931265	108931266	1	-0.307692	AC004014,1
chr11	109025014	109025015	1	-0.155526	AP003123,1
chr13	109042559	109042560	1	-0.298182	MYO16
chr3	109229634	109229635	1	-0.305556	NA
chr2	109405994	109405995	1	-0.428571	SH3RF3
chr2	109452272	109452273	1	-0.285714	SH3RF3
chr3	109524448	109524449	1	-0.135121	LINC01205
chr13	110102354	110102355	1	-0.222222	AL390755,1
chr7	110135336	110135406	1	-0.0891723	AC073114,1
chr2	110161686	110161687	1	-0.254181	NPHP1
chr13	110287542	110287543	1	-0.313187	COL4A1
chr11	110539873	110539874	1	0.135733	NA
chr3	110624090	110624091	1	-0.210606	NA
chr2	110948147	110948148	1	-0.380952	ACOXL
chr13	110992642	110992643	1	-0.345238	NA
chr6	111014486	111014487	1	0.294118	RPF2
chr11	111121565	111121566	1	-0.368421	LINC02550
chr3	111216505	111216506	1	-0.292271	NECTIN3
chr13	111326418	111326440	1	-0.3	TEX29
chr2	111351677	111351678	1	0.4375	MIR4435-2HG
chr3	111511818	111511833	1	-0.250958	CD96
chr8	112337586	112337956	1	-0.158301	CSMD3
chr13	112762501	112762525	2	-0.346154	ATP11A
chr13	112961186	112961187	1	-0.388889	MCF2L
chr12	113029274	113029275	1	-0.303571	NA
chr12	113106284	113106285	1	-0.278195	RASAL1
chr3	113131083	113131084	1	-0.231225	AC078785,1
chr11	113296360	113296361	1	-0.293447	AP000880,1
chr13	113465989	113465990	1	-0.333333	DCUN1D2
chr3	113743294	113743536	1	-0.16431	NAA50
chr7	113756731	113756732	1	-0.339744	NA
chr7	114119805	114119806	1	-0.2975	FOXP2
chr13	114165072	114165073	1	-0.375	CFAP97D2
chr12	114165765	114165766	1	-0.352941	NA
chr12	114967195	114967196	1	-0.292208	NA
chr7	115098789	115098790	1	-0.134365	LINC01392
chr7	115098789	115098790	1	-0.134365	LINC01393
chr6	115394399	115394400	1	0.405882	NA
chr5	115394775	115394776	1	0.3367	NA
chr11	115477677	115477678	1	0.304029	CADM1
chr12	115513319	115513320	1	-0.294643	NA
chr6	115723361	115723362	1	-0.110414	NA
chr6	115761088	115761089	1	-0.128153	NA
chr12	115769841	115769842	1	-0.307692	AC009387,1
chr11	115784638	115784639	1	-0.352941	LINC02698
chr6	115898406	115898407	1	-0.257143	NA
chr3	116213221	116213222	1	-0.263505	LSAMP
chr3	116909153	116909154	1	0.101209	LSAMP
chr12	117126778	117126779	1	-0.4	TESC-AS1
chr3	117598593	117598687	1	0.249129	NA
chr11	117710170	117710171	1	-0.416667	DSCAML1
chr6	118102602	118102603	1	-0.3	SLC35F1
chr5	118176675	118176676	1	-0.181248	LINC02147
chr5	118176675	118176676	1	-0.181248	LINC02208
chr5	118186382	118186383	1	-0.320574	LINC02147
chr5	118186382	118186383	1	-0.320574	LINC02208
chr3	118675172	118675173	1	-0.384615	AC068633,1
chr12	118708876	118708877	1	-0.108679	NA
chr7	118870867	118870868	1	-0.330065	NA
chr11	119347068	119347069	1	-0.303571	NA
chr11	119675189	119675190	1	-0.283333	NECTIN1
chr6	119923153	119923154	1	-0.104958	NA
chr3	119965981	119965982	1	-0.24375	GSK3B
chr11	120097517	120097518	1	-0.305556	NA
chr11	120187225	120187226	1	-0.346154	NA
chr11	120261940	120261941	1	-0.277778	AP001150,1
chr11	120261940	120261941	1	-0.277778	POU2F3
chr11	120770790	120770791	1	-0.307692	GRIK4
chr8	120811579	120812584	2	0.219623	AC104958,2
chr8	120811579	120812584	2	0.219623	SNTB1
chr11	120928774	120928775	1	-0.518182	GRIK4
chr5	121127208	121127209	1	0.4	NA
chr7	121628333	121628334	1	-0.156463	NA
chr3	121871325	121871326	1	-0.156989	EAF2
chr3	121923532	121923709	1	-0.192194	SLC15A2
chr3	121960778	121960779	1	0.135979	NA
chr3	122041757	122041758	1	0.149527	NA
chr6	122314251	122314261	1	-0.249493	NA
chr6	122689473	122689474	1	-0.139553	PKIB
chr5	122721440	122721441	1	-0.0983746	LINC02201
chr12	122793706	122793737	1	0.0857143	CCDC62
chr11	123156425	123156449	1	-0.223323	CLMP
chr5	123712983	123712984	1	-0.175742	NA
chr3	123759164	123759165	1	-0.352941	MYLK
chr12	124045904	124045905	1	-0.384615	AC068790,8
chr12	124045904	124045905	1	-0.384615	RFLNA
chr5	124146911	124146912	1	-0.322222	LINC01170
chr12	124275264	124275265	1	-0.416667	RFLNA
chr3	124377842	124377843	1	0.0994949	KALRN
chr12	124484744	124484745	1	-0.461538	NCOR2
chr6	124529410	124529411	1	-0.291667	NKAIN2
chr11	124912577	124912578	1	-0.272727	NA
chr6	124962771	124962772	1	-0.4	RNF217
chr6	124962771	124962772	1	-0.4	RNF217-AS1
chr6	125078605	125078606	1	-0.375	RNF217
chr2	125087273	125087274	1	-0.151358	NA
chr7	125112603	125112604	1	-0.303571	POT1-AS1
chr11	125270623	125270624	1	-0.416667	PKNOX2
chr11	125417764	125417765	1	-0.3	PKNOX2
chr5	126110578	126110579	1	-0.416667	AC116362,1
chr11	126178893	126178894	1	-0.30179	NA
chr5	126180699	126180700	1	-0.31746	AC116362,1
chr5	126180699	126180700	1	-0.31746	LINC02039
chr3	126196901	126196902	1	0.283333	ALDH1L1
chr3	126196901	126196902	1	0.283333	ALDH1L1-AS2
chr11	126275429	126275430	1	-0.363636	FOXRED1
chr7	126277618	126277749	1	-0.18698	NA
chr6	126390797	126390798	1	-0.187487	AL356534,1
chr3	126438091	126438092	1	-0.333333	ZXDC
chr4	126513147	126513148	1	-0.31746	AC097528,1
chr5	126514272	126514273	1	-0.347826	NA
chr3	126554409	126554410	1	-0.321429	C3orf22
chr5	126685227	126685232	1	0.287302	NA
chr7	126724093	126724094	1	0.3125	GRM8
chr2	126770358	126770748	1	-0.18321	NA
chr7	126816183	126816184	1	-0.230769	GRM8
chr3	127178762	127178763	1	-0.304348	AC112482,3
chr7	128275322	128275323	1	-0.333333	NA
chr3	128528721	128528998	1	-0.0988821	NA
chr3	128875709	128875774	1	0.11	AC112484,5
chr3	128967317	128967367	1	-0.175439	KIAA1257
chr6	128975684	128975752	1	-0.252727	LAMA2
chr12	128992123	128992124	1	0.318182	NA
chr3	129334901	129334902	1	-0.308333	AC137695,1
chr7	129456832	129456833	1	-0.266667	STRIP2
chr12	129834578	129834600	2	-0.448276	TMEM132D
chr7	130240726	130240727	1	0.278274	NA
chr7	130293807	130293808	1	-0.323077	CPA4
chr7	130365781	130365782	1	-0.328431	CPA5
chr11	130463561	130463568	1	-0.27314	ADAMTS15
chr3	130597472	130597473	1	-0.266667	COL6A6
chr12	130674897	130674972	1	0.268102	RIMBP2
chr6	130886123	130886124	1	-0.4	EPB41L2
chr11	130909585	130909586	1	-0.263889	SNX19
chr12	130947131	130947132	1	0.458333	NA
chr12	131072586	131072622	1	-0.0858586	ADGRD1
chr3	131296401	131296402	1	-0.144905	NEK11
chr2	131353866	131354524	1	-0.164736	AC073869,7
chr2	131353866	131354524	1	-0.164736	AC073869,9
chr12	131468632	131468633	1	-0.272727	AC073578,1
chr7	131667722	131667723	1	-0.371795	NA
chr12	131944509	131944510	1	-0.625	PUS1
chr8	132432964	132433465	1	-0.173789	KCNQ3
chr5	132744811	132744812	1	-0.113595	NA
chr6	133040707	133040708	1	-0.333333	LINC00326
chr3	133179787	133179788	1	-0.142522	TMEM108
chr11	133365634	133365635	1	-0.371212	OPCML
chr11	133365634	133365635	1	-0.371212	OPCML-IT1
chr10	133559343	133559344	1	-0.366667	CYP2E1
chr10	133559343	133559344	1	-0.366667	SYCE1
chr11	133671866	133671867	1	-0.315789	NA
chr3	134009021	134009022	1	0.384211	SLCO2A1
chr11	134737768	134737769	1	-0.357143	LINC02714
chr7	134966852	134966853	1	-0.333333	AC083870,1
chr7	134966852	134966853	1	-0.333333	CALD1
chr3	134983916	134983917	1	-0.4	EPHB1
chr3	135021517	135021518	1	-0.169573	EPHB1
chr5	135429858	135429859	1	-0.3	NA
chr6	135567837	135567838	1	0.409091	LINC00271
chr7	135842419	135842420	1	-0.296188	AC015987,1
chr7	135936145	135936146	1	-0.366667	MTPN
chr5	136021229	136021230	1	0.3125	NA
chr7	136124761	136124762	1	-0.35	AC078845,1
chr9	136483898	136483899	1	0.375	C9orf163
chr5	136651811	136651812	1	-0.195455	NA
chr7	136729467	136729468	1	-0.278571	AC009264,1
chr5	137457688	137457689	1	-0.343874	SPOCK1
chr7	137661777	137661778	1	-0.461538	DGKI
chr5	137735960	137735976	2	0.259259	KLHL3
chr3	139449873	139449920	1	-0.281513	AC046134,2
chr7	139496629	139496630	1	-0.230769	NA
chr8	139639415	139639670	1	-0.245098	KCNK9
chr3	139756889	139756898	1	-0.263529	AC046134,2
chr5	140039586	140039587	1	-0.325815	NRG2
chr6	140778646	140778647	1	-0.0972263	AL035446,2
chr6	140885117	140885118	1	-0.294643	AL035446,2
chr5	141782669	141782670	1	-0.449393	NA
chr6	142696738	142696739	1	-0.333333	NA
chr7	143225434	143225435	1	-0.357143	NA
chr3	143455223	143455224	1	-0.166667	SLC9A9
chr5	143595239	143595245	1	-0.289362	AC016598,2
chr5	143978056	143978057	1	0.147768	NA
chr5	144527833	144527865	1	-0.100062	NA
chr6	144658190	144658191	1	-0.232114	UTRN
chr7	144965226	144965227	1	-0.275689	NA
chr7	145232534	145232535	1	-0.149345	NA
chr5	145274231	145274232	1	-0.333333	NA
chr3	145545847	145545848	1	0.155572	NA
chr6	145609640	145609641	1	-0.265107	EPM2A
chr6	146044192	146044193	1	-0.25	GRM1
chr6	146465193	146465194	1	-0.308244	NA
chr6	146594604	146594605	1	-0.458333	AL359547,1
chr7	146595822	146595823	1	-0.307971	CNTNAP2
chr6	146952675	146952676	1	0.147345	STXBP5-AS1
chr7	147166845	147166846	1	-0.289855	CNTNAP2
chr5	147194601	147194602	1	-0.278656	STK32A-AS1
chr7	147225688	147225689	1	-0.0890427	CNTNAP2
chr5	147483105	147483106	1	-0.333333	DPYSL3
chr6	147741284	147741285	1	-0.406593	AL033504,1
chr7	148419920	148419921	1	-0.368421	CNTNAP2
chr3	148871674	148871675	1	0.232143	AC092979,1
chr3	148871674	148871675	1	0.232143	CPA3
chr6	148982244	148982245	1	-0.428571	UST
chr6	149220169	149220170	1	0.295455	AL031056,1
chr6	149220169	149220170	1	0.295455	TAB2
chr6	150293673	150293674	1	0.391304	NA
chr3	150478135	150478136	1	-0.126222	NA
chr3	150543067	150543068	1	0.294118	SERP1
chr3	150888148	150888149	1	-0.323077	AC020636,2
chr3	150888148	150888149	1	-0.323077	CLRN1-AS1
chr3	150888148	150888149	1	-0.323077	MINDY4B
chr7	150938964	150938965	1	-0.357143	NA
chr5	150961057	150961058	1	-0.325792	NA
chr3	151525257	151525269	1	-0.129754	NA
chr7	151702508	151702509	1	-0.272727	PRKAG2
chr5	151950991	151950992	1	-0.47619	LINC01933
chr5	152571291	152571292	1	-0.318182	AC008571,2
chr3	153031847	153031848	1	-0.17778	NA
chr7	153860726	153860727	1	0.315789	NA
chr3	154023840	154023841	1	0.282407	RPL21P42
chr3	154852540	154852541	1	-0.243636	AC073359,2
chr7	154853327	154853328	1	-0.380952	AC073336,1
chr7	154853327	154853328	1	-0.380952	DPP6
chr7	155013188	155013189	1	-0.333333	NA
chr5	155203030	155203031	1	-0.116997	NA
chr6	155594606	155594607	1	-0.179123	NA
chr6	155673854	155673935	1	-0.0866155	NA
chr6	156341874	156341875	1	-0.323077	AL589693,1
chr3	156429429	156429430	1	-0.3125	AC091607,2
chr3	156429429	156429430	1	-0.3125	KCNAB1
chr7	157020509	157020510	1	0.315789	NA
chr7	157071671	157071672	1	0.139224	NA
chr7	157289420	157289421	1	-0.307692	NA
chr3	157323576	157323577	1	-0.324074	AC092944,1
chr3	157323576	157323577	1	-0.324074	VEPH1
chr7	157816551	157816552	1	-0.272727	PTPRN2
chr5	158279068	158279069	1	-0.274286	NA
chr3	158371301	158371302	1	-0.216383	RSRC1
chr5	158517640	158517641	1	-0.388889	AC091939,1
chr5	158658299	158658300	1	-0.303571	NA
chr5	158830903	158830905	1	-0.233333	EBF1
chr6	159095871	159095872	1	0.461538	AL356417,1
chr6	159095871	159095872	1	0.461538	AL356417,3
chr6	159978668	159978704	1	-0.236842	IGF2R
chr5	160642598	160642599	1	-0.241176	ATP10B
chr3	160735344	160735345	1	-0.346154	NA
chr5	161076454	161076455	1	0.352941	NA
chr5	161539689	161539781	1	-0.197343	GABRB2
chr6	161654490	161654491	1	-0.286713	PRKN
chr6	162793073	162793074	1	-0.275	PACRG
chr4	163050863	163050864	1	-0.209266	NA
chr6	163181160	163181356	1	-0.126838	PACRG
chr6	163181160	163181356	1	-0.126838	PACRG-AS3
chr5	163882234	163882235	1	-0.309524	NA
chr3	163967962	163967963	1	0.127484	NA
chr3	164862218	164862219	1	-0.290441	NA
chr5	164968055	164968056	1	0.294466	AC109466,1
chr5	165025096	165025097	1	-0.380952	AC109466,1
chr6	165137071	165137072	1	-0.305556	NA
chr3	165293691	165293692	1	0.0977894	LINC01322
chr3	167640641	167640642	1	-0.368421	WDR49
chr5	167878487	167878488	1	-0.278571	TENM2
chr6	168088540	168088541	1	-0.333333	FRMD1
chr3	168094815	168094840	2	0.357143	AC069243,1
chr3	168094815	168094840	2	0.357143	GOLIM4
chr5	168191494	168191495	1	-0.346591	TENM2
chr6	168196094	168196111	1	-0.259524	AL611929,1
chr6	168341350	168341394	1	-0.203431	NA
chr6	168362753	168362754	1	-0.266667	NA
chr6	168368284	168368367	1	-0.232353	NA
chr5	168402888	168402889	1	0.0936699	WWC1
chr6	168433537	168433538	1	-0.268421	NA
chr5	168703596	168703597	1	-0.307692	SLIT3
chr3	168724579	168724580	1	-0.272727	EGFEM1P
chr5	169212429	169212430	1	-0.216783	SLIT3
chr5	169386312	169386313	1	0.235394	NA
chr6	169397949	169397950	1	0.545455	NA
chr3	169541819	169541820	1	-0.409357	MECOM
chr5	169563063	169563064	1	0.401316	NA
chr3	169603408	169603409	1	-0.176339	MECOM
chr6	169800283	169800290	1	-0.329293	LINC00574
chr5	169910651	169910652	1	-0.416667	DOCK2
chr5	169910651	169910652	1	-0.416667	INSYN2B
chr3	169952513	169952514	1	-0.427778	AC008040,1
chr3	170630866	170630867	1	-0.265985	AC026316,4
chr3	170630866	170630867	1	-0.265985	SLC7A14-AS1
chr3	171196390	171196391	1	-0.114164	TNIK
chr3	172133911	172133912	1	-0.388889	FNDC3B
chr5	172825870	172825871	1	0.157009	NA
chr5	173196494	173196508	1	0.0862069	NA
chr5	173198652	173198653	1	-0.0870716	NA
chr5	173748616	173748617	1	-0.4	NA
chr3	174250758	174250759	1	-0.276786	NLGN1
chr3	175589585	175589586	1	-0.122615	NAALADL2
chr5	177432288	177432289	1	0.380952	GRK6
chr5	179257489	179257498	2	0.305322	ADAMTS2
chr5	179759243	179759244	1	0.375	MAML1
chr5	179957679	179957680	1	-0.2875	RNF130
† chr - chromossome; nCpG - number of CpG in DMR; methdiff - difference in methylation
