# Supplementary material for: DNA Methylation Signature in Mononuclear Cells and Proinflammatory Cytokines May Define Molecular Subtypes in Sporadic Meniere Disease
Source: Preprints.org preprint supplement (doi:10.20944/preprints202110.0030.v1), 2021-10-01
Supplement: Supplementary file 15 [file Table_S8.xls]

## Sheet: Folha1
chr	start	end	nCpG	methdiff	gene
chr1	47023632	47023633	1	0.30303	CYP4X1
chr1	47687910	47687911	1	-0.375676	LINC01738
chr1	54518201	54518202	1	-0.28022	LINC02784
chr1	64579048	64579049	1	-0.298077	MIR4794
chr1	153429190	153429191	1	-0.277778	S100A7P1
chr1	169105101	169105102	1	-0.311765	ATP1B1
chr1	171653103	171653104	1	-0.307692	MYOC
chr1	181668371	181668372	1	-0.298039	AL590998,1
chr10	6088115	6088116	1	-0.227795	RBM17
chr10	44488827	44488828	1	-0.287634	AL356157,2
chr10	132419066	132419067	1	-0.5	AL451069,2
chr11	39161783	39162038	2	-0.0976744	AC021723,2
chr11	46375607	46375608	1	-0.363636	MIR4688
chr11	56663143	56663327	1	-0.101893	OR5AR1
chr11	61588393	61588417	2	0.328321	AP002754,1
chr11	64935944	64935945	1	-0.4	GPHA2
chr11	71628781	71628782	1	-0.222222	AP000867,3
chr11	97001243	97001575	2	-0.155572	MED28P5
chr11	119347068	119347069	1	-0.292208	MFRP
chr12	49366492	49366498	1	0.303846	SPATS2
chr12	52367705	52367706	1	-0.334928	KRT85
chr12	54635173	54635174	1	-0.291667	LACRT
chr13	22837937	22837938	1	0.313853	IPMKP1
chr13	59262528	59262529	1	-0.278261	RPP40P2
chr14	19905347	19905348	1	-0.299043	OR4K4P
chr14	51435373	51435440	1	-0.130379	SETP2
chr14	53918431	53918432	1	-0.34127	AL138479,1
chr14	73458775	73458776	1	0.296296	NUMB
chr14	86282811	86282812	1	0.213904	AL161753,1
chr14	94963949	94963950	1	-0.243333	LINC02279
chr14	101041234	101041235	1	-0.377622	MIR300
chr14	106776129	106776131	1	-0.231372	IGHV3-71
chr15	67839008	67839180	5	0.0887681	AC009292,1
chr15	71817416	71817417	1	-0.234214	AC104938,1
chr15	78245794	78245795	1	-0.331301	ACSBG1
chr16	39180	39181	1	-0.371429	IL9RP3
chr16	1160664	1160665	1	-0.34375	AC120498,1
chr16	3065173	3065174	1	-0.333333	IL32
chr16	87065920	87065921	1	0.346154	AC106745,1
chr17	40176806	40176807	1	-0.240244	RAPGEFL1
chr17	70369057	70369058	1	-0.432432	AC011990,1
chr18	89235	89236	1	-0.357143	IL9RP4
chr18	31966244	31966245	1	-0.338235	AC009831,2
chr19	35142257	35142258	1	0.296296	FXYD7
chr19	40691832	40691833	1	-0.354545	NUMBL
chr19	40911641	40911642	1	-0.287758	CYP2A7P2
chr2	24009691	24009692	1	0.492754	MFSD2B
chr2	28871103	28871104	1	0.344444	TRMT61B
chr2	69438160	69438161	1	-0.271429	NFU1
chr2	131353763	131353867	1	-0.216337	AC073869,2
chr2	163288458	163288459	1	-0.35	RNU6-627P
chr2	222423612	222423613	1	0.272072	SGPP2
chr2	240108879	240108880	1	-0.396364	OR5S1P
chr2	240184613	240184614	1	-0.3	AC124861,4
chr2	240867886	240867975	1	-0.215934	AGXT
chr20	38099045	38099046	1	-0.184866	RN7SL237P
chr20	52483882	52483883	1	-0.246087	AL049765,2
chr20	63217328	63217329	1	-0.328671	AL096828,3
chr21	44667110	44667111	1	-0.238749	KRTAP12-2
chr21	46184685	46184686	1	0.310832	AP001468,1
chr21	46184685	46184686	1	0.310832	SPATC1L
chr22	25903729	25903772	1	-0.263923	MYO18B-AS1
chr22	27143033	27143034	1	-0.288043	AL008638,1
chr3	4981052	4981143	1	0.305361	BHLHE40-AS1
chr3	10330185	10330186	1	-0.284848	MIR378B
chr3	50225925	50225933	1	0.32	GNAI2
chr3	54640611	54640612	1	-0.409091	ESRG
chr3	121431929	121431930	1	-0.285271	AC079841,2
chr4	4858705	4858706	1	0.307692	MSX1
chr4	5459426	5459427	1	-0.296188	RN7SKP275
chr4	7435539	7435579	1	-0.222997	PSAPL1
chr4	47431668	47431669	1	-0.263492	AC107398,3
chr4	69995443	69995444	1	-0.215341	STATH
chr4	140497729	140497903	3	0.148499	AC093671,1
chr5	191297	191298	1	0.435294	LRRC14B
chr5	17656529	17656574	1	-0.273962	H3Y1
chr5	61736646	61736647	1	-0.326797	C5orf64-AS1
chr5	98025618	98025619	1	0.113751	AC008834,1
chr5	178698042	178698043	1	-0.285714	AC113348,1
chr6	2750971	2750972	1	-0.261905	MYLK4
chr6	23649266	23649267	1	-0.206723	AL133270,1
chr6	29995365	29995366	1	-0.349265	MCCD1P2
chr6	33789513	33789529	1	-0.219048	LEMD2
chr6	34744009	34744010	1	0.209462	AL139100,2
chr6	79406885	79406886	1	-0.333333	AL078601,2
chr6	84966663	84966664	1	-0.368421	AL109941,1
chr7	9850199	9850218	1	-0.10578	AC006363,1
chr7	38359818	38359819	1	-0.288793	TRGV3
chr7	139132829	139132830	1	-0.290381	TTC26
chr7	147166845	147166846	1	-0.346352	RANP2
chr8	12381108	12381109	1	-0.534562	AC087203,2
chr8	74549569	74549570	1	-0.306349	MIR5681B
chr8	79890677	79890696	1	0.218242	AC036214,4
chr8	102528283	102528284	1	-0.274704	AP002852,1
chr8	137104409	137104410	1	-0.311966	RNU6-144P
chr9	14025760	14025761	1	-0.238095	AL360089,1
† chr - chromossome; nCpG - number of CpG in DMR; methdiff - difference in methylation
