# Supplementary material for: DNA Methylation Signature in Mononuclear Cells and Proinflammatory Cytokines May Define Molecular Subtypes in Sporadic Meniere Disease
Source: Preprints.org preprint supplement (doi:10.20944/preprints202110.0030.v1), 2021-10-01
Supplement: Supplementary file 16 [file Table_S9.xls]

## Sheet: Folha1
start	end	nCpG	methdiff	gene
26471687	26471688	1	-0.4	HMGN2
33466121	33466122	1	-0.345588	TLR12P
47023632	47023633	1	0.352941	CYP4X1
64579048	64579049	1	-0.314381	MIR4794
95353352	95353353	1	-0.378788	LINC01650
153429190	153429191	1	-0.254789	S100A7P1
181668371	181668372	1	-0.348148	AL590998,1
227563540	227563541	1	0.384615	ZNF678
6088115	6088116	1	-0.280899	RBM17
44488827	44488828	1	-0.28252	AL356157,2
117734496	117734497	1	-0.297619	LINC02674
132419066	132419067	1	-0.545455	AL451069,2
1622269	1622270	1	-0.281859	KRTAP5-4
39161783	39162038	2	-0.107379	AC021723,2
46375607	46375608	1	-0.333333	MIR4688
55958494	55958496	1	-0.200772	OR10AK1P
61588393	61588417	1	0.336257	AP002754,1
64935944	64935945	1	-0.421053	GPHA2
68870347	68870633	2	0.0934956	LINC02701
71628781	71628782	1	-0.233333	AP000867,3
97001574	97001575	1	-0.159348	MED28P5
105352958	105353342	1	-0.121924	AP003530,1
2336596	2336597	1	0.359091	AC005293,1
3468503	3468534	1	-0.237316	AC005908,1
8156109	8156110	1	-0.116774	ZNF705A
46404565	46404566	1	0.435897	AC025031,5
49366492	49366498	1	0.303846	SPATS2
52367705	52367706	1	-0.363636	KRT85
52721991	52721992	1	-0.353175	KRT126P
132277232	132277233	1	-0.329231	AC148477,2
22837937	22837938	1	0.332168	IPMKP1
90136613	90136614	1	0.260417	RNA5SP34
113658794	113658795	1	-0.344444	ATP4B
53918431	53918432	1	-0.362573	AL138479,1
73458775	73458776	1	0.285714	NUMB
81450453	81450454	1	0.355392	LINC02308
94963949	94963950	1	-0.265882	LINC02279
100910994	100911005	1	-0.296919	MIR370
101041234	101041235	1	-0.373077	MIR300
105903662	105903663	1	0.368984	IGHD4-11
105903662	105903663	1	0.368984	IGHD5-12
106776129	106776131	1	-0.269827	IGHV3-71
67839008	67839180	5	0.112977	AC009292,1
71817416	71817417	1	-0.251559	AC104938,1
78245794	78245795	1	-0.305556	ACSBG1
96550824	96550825	1	-0.354167	AC110588,1
39180	39181	1	-0.333333	IL9RP3
1160664	1160665	1	-0.333333	AC120498,1
3065173	3065174	1	-0.416667	IL32
33768486	33768487	1	-0.388889	ENPP7P13
48558697	48558739	1	-0.181617	AC026470,2
87065920	87065921	1	0.346154	AC106745,1
67997190	67997191	1	0.123344	C17orf58
89235	89236	1	-0.375	IL9RP4
35142257	35142258	1	0.375	FXYD7
40911641	40911642	1	-0.291444	CYP2A7P2
24009691	24009692	1	0.435897	MFSD2B
69438160	69438161	1	-0.301449	NFU1
90038707	90038743	1	-0.275	IGKV3D-20
163288458	163288459	1	-0.391304	RNU6-627P
183116738	183116739	1	0.293651	NUP35
238300705	238300706	1	0.4	AC012485,2
240108879	240108880	1	-0.454545	OR5S1P
240184613	240184614	1	-0.35	AC124861,4
38099045	38099046	1	-0.205556	RN7SL237P
52483882	52483883	1	-0.30336	AL049765,2
30283337	30283338	1	-0.244244	KRTAP24-1
46184685	46184686	1	0.339744	AP001468,1
46184685	46184686	1	0.339744	SPATC1L
25903729	25903772	1	-0.298319	MYO18B-AS1
27143033	27143034	1	-0.35119	AL008638,1
4981052	4981143	1	0.303896	BHLHE40-AS1
10330185	10330186	1	-0.4	MIR378B
50225925	50225933	1	0.32	GNAI2
54640611	54640612	1	-0.409091	ESRG
152497015	152497016	1	0.215201	AC026347,2
170995059	170995060	1	-0.270531	RNU1-70P
7435539	7435579	1	-0.27381	PSAPL1
45415341	45415342	1	-0.321739	AC108043,1
47431668	47431669	1	-0.320635	AC107398,3
69995443	69995444	1	-0.241379	STATH
191297	191298	1	0.5	LRRC14B
17656529	17656574	1	-0.34	H3Y1
61736646	61736647	1	-0.402778	C5orf64-AS1
98025618	98025619	1	0.134416	AC008834,1
178698042	178698043	1	-0.422078	AC113348,1
2750971	2750972	1	-0.333333	MYLK4
23649266	23649267	1	-0.26079	AL133270,1
27360409	27360479	1	-0.105871	ZNF204P
29995365	29995366	1	-0.366071	MCCD1P2
34744009	34744010	1	0.230415	AL139100,2
79406885	79406886	1	-0.36	AL078601,2
84966663	84966664	1	-0.4	AL109941,1
132558160	132558161	1	0.159344	TAAR7P
9850199	9850218	1	-0.127082	AC006363,1
38359818	38359819	1	-0.3125	TRGV3
144451231	144451232	1	0.345865	RNU6ATAC40P
147166845	147166846	1	-0.385093	RANP2
12381108	12381109	1	-0.563025	AC087203,2
74549569	74549570	1	-0.278571	MIR5681B
101034311	101034312	1	-0.245455	AC018781,1
137104409	137104410	1	-0.37037	RNU6-144P
14025760	14025761	1	-0.27381	AL360089,1
33719648	33719649	1	-0.321739	AL356489,1
129258144	129258152	1	-0.255675	AL161785,2
129258144	129258152	1	-0.255675	AL161785,3
† chr - chromossome; nCpG - number of CpG in DMR; methdiff - difference in methylation
