# Supplementary material for: DNA Methylation Signature in Mononuclear Cells and Proinflammatory Cytokines May Define Molecular Subtypes in Sporadic Meniere Disease
Source: Preprints.org preprint supplement (doi:10.20944/preprints202110.0030.v1), 2021-10-01
Supplement: Supplementary file 17 [file table_S1.xlsx]

## Sheet: Folha1
Table S1 -	Undermethylated regions (< 10% average methylation) present in at least 75% of Meniere Disease patients and not present in controls.
chr	start	end	N MD	CpG annotation	Gene
chr1	204505866	204505882	11	Inter CpG islands	NA
chr14	20624396	20626053	11	CpG island	NA
chr15	42550020	42550126	12	Cpg shore	HAUS2
chr15	55249888	55250276	11	Inter CpG islands	RAB27A
chr17	49403702	49408310	12	Inter CpG islands	PHB
chr17	49408310	49408414	11	Inter CpG islands	PHB
chr3	172041110	172041286	11	Cpg shore	FNDC3B
chr5	159101384	159101518	12	Cpg shore	LINC02202
chr7	127617036	127621314	11	Inter CpG islands	PAX4
chr7	140923039	140923349	12	Cpg shore	BRAF
chr9	33474684	33474690	11	Inter CpG islands	NA
